# Supplementary material for: Risk of diabetic foot ulcer and its associated factors among Bangladeshi subjects: a multicentric cross-sectional study
Source: PubMed Central journal article supplement — BMJ Open. 2020 Feb 28;10(2):e034058. doi: 10.1136/bmjopen-2019-034058 (PMC7050319; doi:10.1136/bmjopen-2019-034058), 2020-02-28
Supplement: bmjopen-2019-034058.draft_revisions.pdf [file bmjopen-2019-034058.draft_revisions.pdf]

# BMJ Open

BMJ Open is committed to open peer review. As part of this commitment we make the peer review history of every article we publish publicly available.

When an article is published we post the peer reviewers' comments and the authors' responses online. We also post the versions of the paper that were used during peer review. These are the versions that the peer review comments apply to.

The versions of the paper that follow are the versions that were submitted during the peer review process. They are not the versions of record or the final published versions. They should not be cited or distributed as the published version of this manuscript.

BMJ Open is an open access journal and the full, final, typeset and author-corrected version of record of the manuscript is available on our site with no access controls, subscription charges or pay-per-view fees (<http://bmjopen.bmj.com>).

If you have any questions on BMJ Open's open peer review process please email [info.bmjopen@bmj.com](mailto:info.bmjopen@bmj.com)

# BMJ Open

## Risk of diabetic foot ulcer and its predictors among Bangladeshi subjects: a multi-centric cross-sectional study

|                               |                                                                                                                                                                                                                                                                                                                                                                                                                                                                                                                                                                                                                    |
|-------------------------------|--------------------------------------------------------------------------------------------------------------------------------------------------------------------------------------------------------------------------------------------------------------------------------------------------------------------------------------------------------------------------------------------------------------------------------------------------------------------------------------------------------------------------------------------------------------------------------------------------------------------|
| Journal:                      | <i>BMJ Open</i>                                                                                                                                                                                                                                                                                                                                                                                                                                                                                                                                                                                                    |
| Manuscript ID                 | bmjopen-2019-034058                                                                                                                                                                                                                                                                                                                                                                                                                                                                                                                                                                                                |
| Article Type:                 | Original research                                                                                                                                                                                                                                                                                                                                                                                                                                                                                                                                                                                                  |
| Date Submitted by the Author: | 03-Sep-2019                                                                                                                                                                                                                                                                                                                                                                                                                                                                                                                                                                                                        |
| Complete List of Authors:     | <p>Banik, Palash; Bangladesh Institute of Health Sciences, Community Medicine; Bangladesh University of Health Sciences, Noncommunicable Diseases</p> <p>Barua, Lingkan; Bangladesh University of Health Sciences, Noncommunicable Diseases</p> <p>Moniruzzaman, Mohammad; Bangladesh Institute of Health Sciences, Community Medicine</p> <p>Mondal, Rajib; Bangladesh University of Health Sciences, Noncommunicable Diseases</p> <p>Zaman, Farhana; Bangladesh Institute of Health Sciences, Community Medicine</p> <p>Ali, Liaquat; Bangladesh Institute of Health Sciences, Biochemistry and Cell Biology</p> |
| Keywords:                     | Diabetic foot < DIABETES & ENDOCRINOLOGY, DIABETES & ENDOCRINOLOGY, Bangladesh, diabetic foot ulcer risk, International Working Group on the Diabetic Foot, diabetic foot ulcer                                                                                                                                                                                                                                                                                                                                                                                                                                    |
|                               |                                                                                                                                                                                                                                                                                                                                                                                                                                                                                                                                                                                                                    |

SCHOLARONE™  
Manuscripts

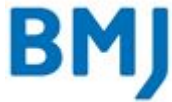

I, the Submitting Author has the right to grant and does grant on behalf of all authors of the Work (as defined in the below author licence), an exclusive licence and/or a non-exclusive licence for contributions from authors who are: i) UK Crown employees; ii) where BMJ has agreed a CC-BY licence shall apply, and/or iii) in accordance with the terms applicable for US Federal Government officers or employees acting as part of their official duties; on a worldwide, perpetual, irrevocable, royalty-free basis to BMJ Publishing Group Ltd ("BMJ") its licensees and where the relevant Journal is co-owned by BMJ to the co-owners of the Journal, to publish the Work in this journal and any other BMJ products and to exploit all rights, as set out in our [licence](#).

The Submitting Author accepts and understands that any supply made under these terms is made by BMJ to the Submitting Author unless you are acting as an employee on behalf of your employer or a postgraduate student of an affiliated institution which is paying any applicable article publishing charge ("APC") for Open Access articles. Where the Submitting Author wishes to make the Work available on an Open Access basis (and intends to pay the relevant APC), the terms of reuse of such Open Access shall be governed by a Creative Commons licence – details of these licences and which [Creative Commons](#) licence will apply to this Work are set out in our licence referred to above.

Other than as permitted in any relevant BMJ Author's Self Archiving Policies, I confirm this Work has not been accepted for publication elsewhere, is not being considered for publication elsewhere and does not duplicate material already published. I confirm all authors consent to publication of this Work and authorise the granting of this licence.

1  
2  
3 1 **Risk of diabetic foot ulcer and its predictors among Bangladeshi subjects: a multi-**  
4  
5 2 **centric cross-sectional study**  
6  
7

8 3 Palash Chandra Banik<sup>1,2\*</sup>, Lingkan Barua<sup>2</sup>, Mohammad Moniruzzaman<sup>1</sup>, Farhana Zaman<sup>1</sup>,  
9 4 Rajib Mondal<sup>2</sup> and Liaquat Ali<sup>3</sup>  
10  
11

12  
13  
14 5 <sup>1</sup>Department of Community Medicine, Bangladesh Institute of Health Sciences, 125/1 Darus  
15  
16 6 Salam, Mirpur-1, Dhaka-1216, Bangladesh  
17

18  
19 7 <sup>2</sup>Department of Noncommunicable Diseases, Bangladesh University of Health Sciences,  
20  
21 8 125/1 Darus Salam, Mirpur-1, Dhaka-1216, Bangladesh  
22

23  
24 9 <sup>3</sup>Department of Biochemistry and Cell Biology, Bangladesh Institute of Health Sciences,  
25  
26 10 125/1 Darus Salam, Mirpur-1, Dhaka-1216, Bangladesh  
27  
28

29 11 **\*Corresponding Author**

30  
31  
32 12 Palash Chandra Banik  
33

34  
35 13 *Assistant Professor*, Department of Noncommunicable Diseases, Bangladesh University of  
36  
37 14 Health Sciences (BUHS), 125/1 Darus Salam, Mirpur-1, Dhaka-1216, Bangladesh  
38

39  
40 15 *Email:* [palashcbanik@buhs.ac.bd](mailto:palashcbanik@buhs.ac.bd)  
41

42  
43 16 Word count (main text): 5198 (including tables and excluding references)  
44

45  
46 17 Word count (abstract): 265 (excluding keywords)  
47  
48

49 18

50 19

51 20

52 21

53 22

54 23

55

56

57

58

59

60

## 24 **Abstract**

### 25 **Objective**

26 To assess the risk of diabetic foot ulcer (DFU) and find out its predictors among type 2  
27 diabetic (T2D) subjects of Bangladesh.

### 28 **Design, setting and participants**

29 This cross-sectional study recruited 1200 T2D subjects who visited sixteen centres of Health  
30 Care Development Project's owned by Diabetic Association of Bangladesh (DAB).

### 31 **Primary and secondary outcome measures**

32 Risk of DFU was assessed using modified version of International Working Group on the  
33 Diabetic Foot (IWGDF) Risk Classification System. This classification system was based on  
34 five parameters namely peripheral neuropathy (PN), peripheral arterial diseases (PAD),  
35 deformity, ulcer history and amputation. The risks were categorized as Group 0 (no PN, no  
36 PAD), Group 1 (PN, no PAD, and no deformity), Group 2A (PN and deformity, no PAD),  
37 Group 2B (PAD), Group 3A (ulcer history) and Group 3B (amputation). The predictors of  
38 DFU risk were determined using multinomial logistic regression for each risk category  
39 separately.

40 **Interventions:** not applicable for this manuscript.

### 41 **Results:**

42 Overall 44.5% of the participants were 'at risk' of DFU. The burden was higher among men  
43 (45.6%) and those lived in rural areas (45.5%). According to IWGDF categories, the risk  
44 was distributed as 55.5%, 4.2%, 11.6%, 0.3%, 20.6% and 7.9% for group 0, group 1, group  
45 2A, group 2B, group 3A and group 3B respectively. The predictors of DFU (odd ratio > 1)  
46 were age  $\geq$  50 years, rural area, low economy status, insulin use, history of trauma, diabetic  
47 retinopathy and diabetic nephropathy.

### 48 **Conclusion**

1  
2  
3 49 Significant proportion of T2D subjects of Bangladesh was at risk of DFU that demands  
4  
5 50 effective screening program to reduce the DFU related morbidity and mortality.  
6  
7  
8

9 51 **Keywords:** diabetes; diabetic foot ulcer; diabetic foot ulcer risk; Bangladesh; International  
10  
11 52 Working Group on the Diabetic Foot; predictors; risk factors  
12  
13

## 14 53 **Article summary**

### 17 54 **Strengths and limitations of this study**

- 20 55 • First study in Bangladesh that prompted to assess the risk of DFU among Bangladeshi  
21  
22 56 subjects using a standard tool
- 24 57 • First time, the predictors of DFU was explored to guide the prevention effort
- 27 58 • Area-wise and gender-wise risk difference will help to identify the disparities and  
28  
29 59 promote decentralization of diabetes foot care for all
- 31 60 • Cross-sectional design did not allow to establish any causal relationship
- 34 61 • The risk may be overestimated or underestimated as all the centers were not provided  
35  
36 62 same quality diabetes care

### 39 63 **Introduction**

41  
42 64 In recent years, the epidemic of diabetes mellitus (DM) has become a fast-expanding public  
43  
44 65 health problem affecting both developed and developing countries [1]. The International  
45  
46 66 Diabetes Federation (IDF) reported that about 415 million people had DM globally and it will  
47  
48 67 be projected to reach 642 million by 2040 or may be even doubled by the year 2040 [2].  
49  
50  
51 68 Among the clinical classifications of DM, Type 2 diabetes (T2D) is more common and  
52  
53 69 prevalent in certain ethnic groups, estimates are of up to six times more common in people of  
54  
55 70 South Asian descent, three times more common in those of African and African-Caribbean  
56  
57  
58 71 descent, and is more common in people of Chinese descent compared with the white  
59  
60

1  
2  
3 72 population [3]. Like other developed and developing countries, it is also an epidemic in  
4  
5 73 Bangladesh. Evidence suggested that 9.7% of Bangladeshi adult population (>35 years) are  
6  
7 74 diabetic and 22.4% are prediabetic [4]. Trend analysis revealed an increasing prevalence of  
8  
9 75 DM in Bangladesh as from 4% in 1995 to 2000 and 5% in 2001 to 2005 to 9% in 2006 to  
10  
11 76 2010 respectively [5]. As the prevalence of diabetes increases, the prevalence of long-term  
12  
13 77 diabetes-related complications is also likely to increase. Diabetic foot ulcer (DFU) is a  
14  
15 78 common and important complication of diabetes, representing a major healthcare burden with  
16  
17 79 significant morbidity [6].  
18  
19  
20

21 80 Diabetic foot is defined as the presence of infection, ulceration and/or destruction of deep  
22  
23 81 tissues associated with neurologic abnormalities and various degrees of peripheral arterial  
24  
25 82 disease (PAD) in the lower limb in patients with diabetes [7]. It is a significant cause of  
26  
27 83 morbidity and can lead to prolonged hospital stays, which is evidenced by the fact that ~20%  
28  
29 84 of hospitalizations related to diabetes involve DFU [8]. The mortality rate in patients with  
30  
31 85 DFU is also high and is approximately twice that of patients without ulceration [9]. Other  
32  
33 86 than the morbidity and mortality, the toll of economic burden in terms of direct and indirect  
34  
35 87 cost is also high for those having DFU, estimated approximately €11.6 billion per year for  
36  
37 88 Europe in 2017 and €7.6–11 billion among Medicare beneficiaries of United States from  
38  
39 89 2007 to 2014. Another issue related to foot ulcers among diabetic patient is health-related  
40  
41 90 quality of life that cannot be measured in economic terms. It has reported that patients with  
42  
43 91 foot ulcers or amputation have low health-related quality of life due to substantial burden of  
44  
45 92 depression and other physical problems like inability to do simple task or recreational  
46  
47 93 activities [7].  
48  
49  
50

51 94 The major risk factors of DFU are a loss of protective sensation due to diabetic peripheral  
52  
53 95 neuropathy (DPN), peripheral arterial diseases (PAD) and trauma. However, first two are not  
54  
55 96 independently responsible for DFU; it is the combination of triad of neuropathy and PAD  
56  
57  
58  
59  
60

1  
2  
3 97 with trauma that leads to foot problems. It has reported that trauma and PAD are the major  
4  
5 98 contributors to foot ulceration, and diabetic neuropathy is the common denominator in almost  
6  
7 99 90% of DFU. Other than these three leading risk factors, male gender, previous foot  
8  
9  
10 100 ulceration or amputation, foot deformities, calluses, Charcot arthropathy and high plantar  
11  
12 101 pressures have been associated with an increased risk for foot ulceration. There are some  
13  
14 102 diabetes related risk factors that also associated with risk of foot ulcers including duration of  
15  
16 103 diabetes, poor glycaemic control, diabetic retinopathy, nephropathy, poor compliance of the  
17  
18 104 patient with medical instructions and neglectful behavior. Some societal and behavioral risk  
19  
20 105 factors also showed significant association with DFU including low socioeconomic  
21  
22 106 condition, poor access to healthcare services, poor educational status, living alone and  
23  
24 107 cigarette smoking [7, 10]. Previous studies reported that the risk of diabetic foot or  
25  
26 108 amputation is significantly lower among the Asians compared to Europeans in the United  
27  
28 109 Kingdom [11-12]. This reduced risk is probably due to low prevalence of DPN and PAD  
29  
30 110 among Asians, but the exact reason is not fully understood. However, previous study reported  
31  
32 111 the prevalence of DPN among Bangladeshi subjects was 19.7% and it was significantly as  
33  
34 112 well as independently associated with age, mode of treatment, income, duration of diabetes  
35  
36 113 and glycaemic status [13].

37  
38 114 The best possible way to prevent DFU is identification of individuals at risk, proper health  
39  
40 115 education and timely follow-up [14]. It has estimated that the lifetime risk of foot ulcers  
41  
42 116 among diabetic population is 19% – 34% [7]. To overcome this burden of DFU, clinicians are  
43  
44 117 recommended to estimate the risk and response to the associated factors that increase risk  
45  
46 118 [10]. However, published data related to diabetic foot risk assessment and associated factors  
47  
48 119 among Bangladeshi subjects are absolutely lacking. Hence, we prompted to assess the risk of  
49  
50 120 foot ulcers and sought to determine the factors that influenced the risk among T2D patients of  
51  
52 121 Bangladesh.



## 122 **Methods**

### 123 **Study design**

124 This cross-sectional study was conducted among 1200 T2D patients visited multiple centres  
125 of Health Care Development Project's (HCDP) owned by Diabetic Association of  
126 Bangladesh (DAB). Total sixteen centres were selected; seven from Dhaka districts and rest  
127 nine from northern part of Bangladesh. We selected the centre purposively and followed  
128 convenient sampling technique to collect data from diabetic subjects. Exclusion criteria  
129 included presence of DFU during interview, acute illness of the subjects, unwilling to  
130 participate or those with mental instability. To meet the eligibility, the subjects were screened  
131 as having no DFU based on their self-reported statement, clinical history, foot examination  
132 and medical records review.

### 133 **Data collection and measurement**

134 The data collection procedure was comprised of two phases and conducted from July 2011 to  
135 June 2012. At first phase, face-to-face interview was conducted using pre-tested  
136 questionnaire adapted from STEP-wise approach to Surveillance (STEPS) of  
137 Noncommunicable diseases risk factors of World Health Organization (WHO) with  
138 appropriate modifications [15]. The questionnaire collected sociodemographic, behavioral  
139 risk factors (tobacco use, physical inactivity), diabetes (duration, medication) and its  
140 complications (retinopathy, nephropathy), and foot problem related information (neuropathy,  
141 PAD, trauma, Foot hygiene) of the participants. The blood glucose levels (fasting/random)  
142 and presence of diabetic nephropathy or retinopathy related information of the participants  
143 were extracted from their diabetes record book. The last record within one month was  
144 considered to assess glycaemic status. In second phase, physical measurements  
145 (anthropometric and blood pressure) and foot examination were carried out by trained  
146 physicians. The anthropometric and blood pressure measurement followed the methods

1  
2  
3 147 described in ‘Noncommunicable disease risk factors survey Bangladesh 2010’ [16]. The  
4  
5 148 anthropometric measurements included height, weight, waist circumference, hip  
6  
7 149 circumference, and their derivatives like body mass index (BMI) and waist-hip ratio. The foot  
8  
9 150 examination was the part of DFU risk assessment that described below briefly.

### 12 151 **Assessment of DFU**

14 152 Risk of DFU was assessed using modified version International Working Group on the  
15  
16 153 Diabetic Foot (IWGDF) Risk Classification System proposed by Lavery *et al.* [17]. We  
17  
18 154 screened each patient to identify lower extremity complications and presence of any risk  
19  
20 155 factors like ulcerations, amputation, peripheral neuropathy (PN), PAD, foot deformities,  
21  
22 156 limited joint mobility, and abnormal foot pressures using the methods followed by Lavery *et*  
23  
24 157 *al.* [17-18]. We used a 10-g Semmes-Weinstein monofilament and vibration perception  
25  
26 158 threshold tester to assess peripheral neuropathy (PN), Ankle Brachial Index (ABI) to detect  
27  
28 159 PAD, Goniometer to identify foot deformity and clinical examinations to evaluate joint  
29  
30 160 mobility. We defined PAD as non-palpable dorsalis pedis or posterior tibial arterial pulse and  
31  
32 161 ankle brachial index in either foot  $< 0.80$ . The deformity was defined as any contracture that  
33  
34 162 could not be fully corrected manually, such as hallux valgus, hammer toes or claw toes,  
35  
36 163 hallux rigidus and ankle equines [17]. Again, infection was defined by criteria consistent with  
37  
38 164 the International Working Group and Infectious Diseases Society of America guidelines [19].  
39  
40 165 The risks were categorized according to modified IWGDF risk classification system: Group 0  
41  
42 166 (no PN, no PAD), Group 1 (PN, no PAD, no deformity), Group 2A (PN and deformity, no  
43  
44 167 PAD), Group 2B (PAD), Group 3A (ulcer history) and Group 3B (amputation). Here, Group  
45  
46 168 0 indicated ‘no risk’ and rest of the groups (1, 2A, 2B, 3A, 3B) classified the study  
47  
48 169 population ‘at risk’ of varying degree.

### 56 170 **Quality assurance**

1  
2  
3 171 To ensure standard quality control, a panel of senior researchers and survey investigators  
4  
5 172 visited the data collection sites to monitor the activities. To prevent bias, anonymity of the  
6  
7  
8 173 monitoring panel was preserved to the data collectors. All team members including  
9  
10 174 investigators, supervisor and data collectors were participated in an intensive 3-consecutive  
11  
12 175 training programme in Dhaka before commencement of the survey. First training program  
13  
14 176 was conducted for the physicians who involved in foot examination. This training program  
15  
16 177 was focused on “Detection of Diabetic Foot Problem at the Early Stage” through screening  
17  
18 178 using standard instrument. A highly qualified neurologist from a reputed post-graduate  
19  
20 179 training institution was appointed as a resource person to conduct the sessions. Second and  
21  
22 180 third training was conducted for volunteer data collectors who interviewed the respondents to  
23  
24 181 fill-up the questionnaire. The purpose of these training was to inform the data collectors  
25  
26 182 about potential difficulties associated with data collection. During this intensive training, data  
27  
28 183 collectors got practical training about mode of self-administration of the questionnaire, mode  
29  
30 184 of physical measurement and maintenances of data collection environment. Other than these  
31  
32 185 initiatives, to assure quality of the study we also followed certain protocol as (1) pre-testing  
33  
34 186 of the whole procedure (2) used standard method of measurement as per STEPS survey of  
35  
36 187 Bangladesh 2010 (3) used show cards to better understanding of different forms of tobacco  
37  
38 188 use and intensity of physical activities (4) maintained adequate privacy during physical  
39  
40 189 measurements and clinical examinations (5) applied robust equipment for physical  
41  
42 190 measurement and clinical examination. None of the quality control observer reported any  
43  
44 191 violation of physical measurement and data collection.  
45  
46  
47  
48  
49  
50

## 51 192 **Patient and public involvement**

52 193 We collected data from the patients who visited the selected diabetes care centers of DAB.  
53  
54 194 However, they were not involved directly in the setting of the research question or the  
55  
56 195 outcome measures. They did not have any role in designing or implementing this work or  
57  
58  
59  
60

1  
2  
3 196 interpretation of the results. We were unable to disseminate results of this study directly to  
4  
5 197 study participants due to the anonymous nature of the data. We had a plan to disseminate our  
6  
7  
8 198 findings to the general population through the local and national press.  
9

### 10 199 **Ethical consideration**

11  
12  
13 200 The purpose of the study, rights of the respondents and data safety issues were explained to  
14  
15 201 the participants. All subjects gave their informed written consent for inclusion before they  
16  
17 202 participated in the study. The study was conducted in accordance with the Declaration of  
18  
19 203 Helsinki, and the protocol was approved by the Ethical Review Committee of Bangladesh  
20  
21 204 Diabetic Association (Identification number: BADAS/BIO/EA/11/033) on 17<sup>th</sup> January 2011.  
22  
23

### 24 205 **Data processing and analysis**

25  
26 206 Data were analyzed using the Statistical Package for Social Science (SPSS) version 20.0 for  
27  
28 207 Windows (SPSS, Inc. Chicago. IL.USA). All estimates of precision were presented at 95%  
29  
30 208 confidence interval (CI) in the tables. Descriptive analysis included mean, standard deviation  
31  
32 209 (SD), median and interquartile range (IQR), frequencies and percentages where appropriate.  
33  
34  
35 210 In this study the p-value was considered statistically significant at a threshold of  $p < 0.05$ . In  
36  
37 211 our study, we found only three respondents having PAD. Hence, we had to merge group 2B  
38  
39 212 with group 2A and made a new variable namely group 2-A/B which was implied in  
40  
41 213 multinomial logistic regression analysis. To find out the predictors, we run chi-square test  
42  
43 214 and the variables showed significant association ( $p < 0.05$ ) with the modified IWGDF risk  
44  
45 215 classification were identified. Then those variables were examined as independent variable  
46  
47 216 against the dependent variable in the multinomial logistic regression analysis. For  
48  
49 217 multinomial logistic regression analysis, we calculated odds ratios (OR), and 95% CI for each  
50  
51 218 independent variable. In the regression table, predictors those had  $OR > 1$  were presented for  
52  
53 219 each risk category. We ensured presence of no multicollinearity using Variance Inflation  
54  
55 220 Factor (VIF) to run the regression analysis.  
56  
57  
58  
59  
60

221 We used the STROBE (Strengthening the Reporting of Observational Studies in  
222 Epidemiology) guidelines for reporting the cross-sectional observational study [20].

## 223 Results

### 224 Sociodemographic characteristics and diabetes related information

225 The mean age of the participants was  $51.6 \pm 11.9$  years and most of them were 50 - 59 years  
226 age group (33.1%). More than half of the participants were women (62.9%) and  
227 predominantly urban residents (67.3%). Most of them completed primary level education  
228 (36.7%), married (99%), housewives (57.8%) and came from middle-income background  
229 (44.5%). However, urban participants were more literate (88.2%) and economically stable  
230 ( $60.3\% >$  lower-middle-income range) than their rural counterpart. The mean duration of  
231 diabetes was  $6.9 \pm 5.9$  years and majority of them had uncontrolled glycaemic status (89.3%).  
232 Among the diabetes related complications, the proportion of retinopathy (14.3%) was much  
233 higher than the nephropathy (5.6%). No mentionable urban-rural difference was observed for  
234 glycaemic status and diabetic nephropathy (Table 1).

235 **Table 1: Sociodemographic and diabetes related information of the study subjects,**  
236 **n=1200**

| Variables                     | Urban           |             | Rural           |              | Total           |             |
|-------------------------------|-----------------|-------------|-----------------|--------------|-----------------|-------------|
|                               | n (%)           | 95% CI      | n (%)           | 95% CI       | n (%)           | 95% CI      |
| Age (years)*                  | $52.3 \pm 11.9$ |             | $50.2 \pm 11.8$ |              | $51.6 \pm 11.9$ |             |
| <b>Age categories (years)</b> |                 |             |                 |              |                 |             |
| < 30                          | 52 (4)          | 2.6 – 5.4   | 22 (5.6)        | 3.3 – 7.9    | 54 (4.5)        | 3.3 – 5.7   |
| 30 - 39                       | 63 (7.8)        | 5.9 – 9.7   | 39 (9.9)        | 14.6 - 18    | 102 (8.5)       | 6.9 – 10.1  |
| 40 - 49                       | 212 (26.3)      | 23.3 – 29.3 | 109 (27.7)      | 23.3 – 32.1  | 321 (26.8)      | 24.3 – 29.3 |
| 50 - 59                       | 270 (33.5)      | 30.2 – 36.8 | 127 (32.3)      | 27.7 – 36.9  | 397 (33.1)      | 30.4 – 35.8 |
| $\geq 60$                     | 230 (28.5)      | 25.4 – 31.6 | 96 (24.4)       | 20.2 – 28.6  | 326 (27.2)      | 24.7 – 29.7 |
| <b>Gender</b>                 |                 |             |                 |              |                 |             |
| Men                           | 302 (37.4)      | 34.1 – 40.7 | 143 (36.4)      | 31.6 – 41.2  | 445 (37.1)      | 34.4 – 39.8 |
| Women                         | 505 (62.6)      | 59.3 – 65.9 | 250 (63.6)      | 58.8 – 68.4  | 755 (62.9)      | 60.2 – 65.6 |
| <b>Educational status</b>     |                 |             |                 |              |                 |             |
| Illiterate                    | 95 (11.8)       | 9.6 – 14    | 107 (27.2)      | 22.8 – 31.6  | 210 (16.8)      | 14.7 – 18.9 |
| Primary                       | 288 (35.7)      | 32.4 – 39   | 152 (38.7)      | 33.9 – 43.5  | 440 (36.7)      | 34 – 39.4   |
| Secondary                     | 265 (32.8)      | 29.6 – 36   | 98 (24.9)       | 20.6 – 29.2  | 363 (30.3)      | 27.7 – 32.9 |
| Higher education              | 159 (19.7)      | 17 – 22.4   | 36 (9.2)        | 6.3 – 12.1   | 195 (16.3)      | 14.2 – 18.4 |
| <b>Marital status</b>         |                 |             |                 |              |                 |             |
| Married                       | 797 (98.8)      | 98 – 99.6   | 391 (99.5)      | 98.8 – 100.2 | 1188 (99)       | 98.4 – 99.6 |
| Others                        | 10 (1.2)        | 0.4 – 2     | 2 (0.5)         | -0.2 – 1.2   | 12 (1)          | 0.4 – 1.6   |

| <b>Occupational status</b>              |                       |             |                      |             |                       |             |
|-----------------------------------------|-----------------------|-------------|----------------------|-------------|-----------------------|-------------|
| Service holder                          | 184 (22.8)            | 19.9 – 25.7 | 49 (12.5)            | 9.2 – 15.8  | 233 (19.4)            | 17.2 – 21.6 |
| Business                                | 89 (11)               | 8.8 – 13.2  | 38 (9.7)             | 6.8 – 12.6  | 127 (10.6)            | 8.9 – 12.3  |
| Housewife                               | 462 (57.2)            | 53.8 – 60.6 | 231 (58.8)           | 53.9 – 63.7 | 693 (57.8)            | 55 – 60.6   |
| Others                                  | 72 (8.9)              | 6.9 – 10.9  | 75 (15.2)            | 11.7 – 18.7 | 147 (12.3)            | 10.4 – 14.2 |
| <b>Monthly household income (BDT) †</b> | 20000 (10000 – 40000) |             | 10000 (6000 – 20000) |             | 20000 (10000 – 30000) |             |
| <b>Monthly household income groups</b>  |                       |             |                      |             |                       |             |
| <4907 (low)                             | 21 (2.6)              | 1.5 – 3.7   | 41 (10.4)            | 7.4 – 13.4  | 62 (5.2)              | 3.9 – 6.5   |
| 4907–19,488 (lower-middle)              | 299 (37.1)            | 33.8 – 40.4 | 238 (60.6)           | 55.8 – 65.4 | 537 (44.8)            | 42 – 47.6   |
| 19489–60252 (upper-middle)              | 422 (52.3)            | 48.9 – 55.7 | 108 (27.5)           | 23.1 – 31.9 | 530 (44.2)            | 41.4 – 47   |
| >60,252 (high)                          | 65 (8.1)              | 6.2 – 10    | 6 (1.5)              | 0.3 – 2.7   | 71 (5.9)              | 4.6 – 7.2   |
| <b>Duration of diabetes (years)*</b>    | 7.3 ± 6               |             | 6.3 ± 5.8            |             | 6.9 ± 5.9             |             |
| <b>Glycaemic status§</b>                |                       |             |                      |             |                       |             |
| Controlled                              | 87 (10.8)             | 8.7 – 12.9  | 42 (10.7)            | 7.6–13.8    | 129 (10.8)            | 9 – 12.6    |
| Uncontrolled                            | 720 (89.2)            | 87.1 – 91.3 | 351 (89.3)           | 86.2 – 92.4 | 1071 (89.3)           | 87.6 – 91   |
| <b>Diabetic retinopathy</b>             | 134 (16.6)            | 14 – 19.2   | 38 (9.7)             | 6.8 – 12.6  | 172 (14.3)            | 12.3 – 16.3 |
| <b>Diabetic nephropathy</b>             | 46 (5.7)              | 4.1 – 7.3   | 21 (5.3)             | 3.1 – 7.5   | 67 (5.6)              | 4.3 – 6.9   |

\*Representing mean and standard deviation,

†Presented as median with interquartile range,

‡ According to the 2006 per-capita gross national income (GNI) and the World Bank calculation,

§Based on plasma glucose level pre-meal (fasting) < 6.1 mmol/l and / two hours post meal < 7.8 mmol/l

## Risk of DFU among the study population

Here, Table 2 depicted the gender and area-based distribution of DFU risk according to modified version of IWGDF classification. Overall 44.5% of the study population were diagnosed as ‘at risk’ of DFU and the burden was higher among men (45.6%) and those lived in rural areas (45.5%). The risk of DFU according to modified version of IWGDF was 55.5%, 4.2%, 11.6%, 0.3%, 20.6% and 7.9% for group 0, group 1, group 2A, group 2B, group 3A and group 3B respectively. Among the six groups of risk classification, group 3A (ulcer history) showed maximum burden (20.6%) compared to other groups. Gender and area-wise distribution revealed that 21.8% men and one fourth of the rural residents (25.7%) had the previous history of foot ulceration than their counterpart.

**Table 2: Gender and area-based distribution of DFU risk among the study subjects, n = 1200**

| IWGDF DFU risk classification | Gender     |          | Area of residence |            | Overall    |
|-------------------------------|------------|----------|-------------------|------------|------------|
|                               | Men        | Women    | Urban             | Rural      |            |
|                               | n (%)      | n (%)    | n (%)             | n (%)      |            |
| Group 0 (no PN, no PAD)       | 242 (54.4) | 430 (57) | 452 (56)          | 214 (54.5) | 666 (55.5) |

|                                     |           |            |            |            |            |
|-------------------------------------|-----------|------------|------------|------------|------------|
| Group 1 (PN, no PAD, no deformity)  | 18 (4)    | 32 (4.2)   | 32 (4)     | 18 (4.6)   | 50 (4.2)   |
| Group 2A (PN and deformity, no PAD) | 49 (11)   | 90 (11.9)  | 103 (12.8) | 36 (9.2)   | 139 (11.6) |
| Group 2B (PAD)                      | 1(0.2)    | 2 (0.3)    | 3 (0.4)    | 0          | 3 (0.3)    |
| Group 3A (ulcer history)            | 97 (21.8) | 150 (19.9) | 146 (18.1) | 101 (25.7) | 247 (20.6) |
| Group 3B (amputation)               | 38 (8.5)  | 57 (7.5)   | 71 (8.8)   | 24 (6.1)   | 95 (7.9)   |

253 IWGDF, International Working Group on the Diabetic Foot; DFU, diabetic foot ulcer, PN, peripheral  
254 neuropathy; PAD, peripheral arterial disease

### 255 Predictors of DFU risk among the study subjects

256 Here, Table 3 depicted the predictors of DFU risk among the study population. Total six  
257 predictors were identified those showed high odds (>1) for different groups of risk as age  
258 (group 2, OR 1.212; group 3B, OR 1.173), area of residence (group 1, OR 1.188; group 3A,  
259 OR 1.461), monthly income (group 2, OR 1.491; group 3A, OR 1.415; group 3B, OR 1.768),  
260 medication (group 2, OR 1.014), history of trauma (group 1, OR 2.015; group 2, OR 1.032;  
261 group 3A, OR 2.998; group 3B, OR 3.104), diabetic retinopathy (group 1, OR 1.104; group  
262 3B, OR, 1.933) and diabetic nephropathy (group 1, OR 2.174; group 3A, OR 1.260; group  
263 3B, OR 2.389). Overall, the odds for risk of DFU was higher among those having age  $\geq 50$   
264 years, living in rural area, monthly income  $\leq 19,488$  BDT, with previous history of trauma,  
265 insulin user and having diabetic complications as retinopathy or nephropathy.

266 **Table 3: Predictors of diabetic foot ulcer among type 2 diabetic subjects of Bangladesh using multinomial**  
267 **logistic regression, n = 1200**

| Risk groups          | Predictors           | B     | p-value | OR          | 95% CI for OR |             |
|----------------------|----------------------|-------|---------|-------------|---------------|-------------|
|                      |                      |       |         |             | Lower Bound   | Upper Bound |
| Group 1              | Area of residence    |       |         |             |               |             |
|                      | Rural area           | 0.172 | 0.573   | 1.188       | 0.652         | 2.165       |
|                      | Urban area           |       |         |             | <i>Ref.</i>   |             |
|                      | History of trauma    |       |         |             |               |             |
|                      | Present              | 0.7   | 0.076   | 2.015       | 0.929         | 4.369       |
|                      | Absent               |       |         |             | <i>Ref.</i>   |             |
|                      | Diabetic retinopathy |       |         |             |               |             |
|                      | Present              | 0.099 | 0.814   | 1.104       | 0.486         | 2.508       |
| Absent               |                      |       |         | <i>Ref.</i> |               |             |
| Diabetic nephropathy | Present              | 0.526 | 0.14    | 2.174       | 755           | 6.099       |
|                      | Absent               |       |         |             | <i>Ref.</i>   |             |
| Group 2-A/B†         | Age                  |       |         |             |               |             |
|                      | $\geq 50$ years      | 0.192 | 0.324   | 1.212       | 0.827         | 1.774       |

|          |                      |       |          |       |             |       |       |
|----------|----------------------|-------|----------|-------|-------------|-------|-------|
|          | < 50 years           |       |          |       | <i>Ref.</i> |       |       |
|          | Monthly income (BDT) |       |          |       |             |       |       |
|          | ≤ 19,488             | 0.4   | 0.039*   | 1.491 |             | 1.020 | 2.181 |
|          | > 19,488             |       |          |       | <i>Ref.</i> |       |       |
|          | Medication           |       |          |       |             |       |       |
|          | Insulin user         | 0.013 | 0.945    | 1.014 |             | 0.692 | 1.485 |
|          | Insulin non-user     |       |          |       | <i>Ref.</i> |       |       |
|          | History of trauma    |       |          |       |             |       |       |
|          | Present              | 0.032 | 0.916    | 1.032 |             | 0.570 | 1.870 |
|          | Absent               |       |          |       | <i>Ref.</i> |       |       |
|          | Area of residence    |       |          |       |             |       |       |
|          | Rural area           | 0.379 | 0.014*   | 1.461 |             | 1.081 | 1.975 |
|          | Urban area           |       |          |       | <i>Ref.</i> |       |       |
|          | Monthly income (BDT) |       |          |       |             |       |       |
|          | ≤ 19,488             | 0.347 | 0.031*   | 1.415 |             | 1.032 | 1.940 |
|          | > 19,488             |       |          |       | <i>Ref.</i> |       |       |
| Group 3A | History of trauma    |       |          |       |             |       |       |
|          | Present              | 1.098 | < 0.001* | 2.998 |             | 2.044 | 4.396 |
|          | Absent               |       |          |       | <i>Ref.</i> |       |       |
|          | Diabetic Nephropathy |       |          |       |             |       |       |
|          | Present              | 0.231 | 0.504    | 1.260 |             | 0.640 | 2.482 |
|          | Absent               |       |          |       | <i>Ref.</i> |       |       |
|          | Age                  |       |          |       |             |       |       |
|          | ≥ 50 years           | 0.160 | 0.494    | 1.173 |             | 0.742 | 1.854 |
|          | < 50 years           |       |          |       | <i>Ref.</i> |       |       |
|          | Monthly income (BDT) |       |          |       |             |       |       |
|          | ≤ 19,488             | 0.570 | 0.016*   | 1.768 |             | 1.114 | 2.805 |
|          | > 19,488             |       |          |       | <i>Ref.</i> |       |       |
|          | History of trauma    |       |          |       |             |       |       |
| Group 3B | Present              | 1.133 | < 0.001* | 3.104 |             | 1.810 | 5.324 |
|          | Absent               |       |          |       | <i>Ref.</i> |       |       |
|          | Diabetic retinopathy |       |          |       |             |       |       |
|          | Present              | 0.659 | 0.018*   | 1.933 |             | 1.122 | 3.329 |
|          | Absent               |       |          |       | <i>Ref.</i> |       |       |
|          | Diabetic nephropathy |       |          |       |             |       |       |
|          | Present              | 0.871 | 0.024*   | 2.389 |             | 1.123 | 5.083 |
|          | Absent               |       |          |       | <i>Ref.</i> |       |       |

268 OR, odd-ratio; CI, confidence interval; Ref, reference; BDT, Bangladesh taka

269 \*indicates significant

270 †Group 2B was merged with 2A as the participants were very few in the group 2B

## 271 Discussion

272 Our study demonstrated that nearly half (45%) of the T2D subjects of Bangladesh were at  
 273 risk of DFU and rural population was mostly affected. This finding was significant as there is  
 274 no straight forward evidence on risk of DFU among T2D population of Bangladesh.  
 275 Moreover, the contributing factors have not yet been explored from the Bangladesh  
 276 perspective to take an effective initiative to reduce the burden of associated morbidity and  
 277 mortality.



1  
2  
3 278 In our modified DFU risk classification as per IWGDF, higher burden was observed in the  
4  
5 279 group of those had previous history of foot ulcer (20.6%). This proportion is much higher  
6  
7  
8 280 than the Iranian study that detected only 7% of the study subjects had previous history of foot  
9  
10 281 ulceration [21]. Our finding was also higher than the European country Portugal that reported  
11  
12 282 previous history of DFU among 16% of study subjects using modified IWGDF risk  
13  
14 283 classification [22]. Although it has estimated that the annual risk of DFU is around 2%, this  
15  
16 284 risk in patients with previous history of foot ulceration is expected to increase to 17–60%  
17  
18 285 over the next three years [23]. Several studies reported the cumulative burden of previous  
19  
20 286 history of foot ulcer and amputation as a part of diabetic foot risk assessment. In our study,  
21  
22 287 the cumulative proportion of previous history of foot ulcer and amputation was 14.3% which  
23  
24 288 was twice of the study conducted in neighboring country India [24,25] and half of the  
25  
26 289 Portugal [22]. A follow-up study of USA detected nearly three-times higher proportion of  
27  
28 290 foot ulcer or amputation compared to current study [26]. In this regard, a systematic review  
29  
30 291 comprised of 41 documents by Hunt et al. found that the person with previous history of DFU  
31  
32 292 have the 66% and 12% five-years cumulative rate of ulcer recurrence and amputation  
33  
34 293 respectively [27].

35  
36  
37  
38  
39 294 We have mentioned previously that PN is one of the major risk factors of DFU. In our study,  
40  
41 295 4.2% of the T2D subjects had only PN and 11.6% had PN with deformity, represented as  
42  
43 296 group 1 and group 2A respectively. This finding was much lower compared to similar studies  
44  
45 297 conducted among subjects of India [24,28-29] and Iran [21,29]. However, this burden is  
46  
47 298 higher than the European country Portugal [22]. Current study classified very low proportion  
48  
49 299 of T2D subjects as having PAD compared to aforementioned studies [21-22,24,28-30]. The  
50  
51 300 overall burden of ‘at risk’ (other than group 0) T2D subjects of this study were also lower  
52  
53 301 than the findings of India [28-29] and Portugal [22]. However, proportion of ‘at risk’ subjects  
54  
55 302 was more than twice of aforementioned Indian [24] and Iranian study [21]. The reasons of  
56  
57  
58  
59  
60

1  
2  
3 303 risk difference in different countries are still unclear. The study of Abott et al. tried to explore  
4  
5 304 this risk difference among different ethnic population including South-Asians, African-  
6  
7 305 Caribbean's and Europeans of United Kingdom [11]. They reported the possibilities of such  
8  
9 306 difference might be due to methods applied to detect neuropathy, provision of primary health  
10  
11 307 care services, such as diabetes mini-clinics, podiatric care, and referrals for special footwear  
12  
13 308 for the health care districts and variable quality of health care. Regarding burden of risk  
14  
15 309 factors of DFU, Abott et al. added that the lower level of PN and PAD also contributed for  
16  
17 310 less percentage of South-Asian population 'at risk' compared to Europeans. Another cause of  
18  
19 311 DFU risk difference is application of various risk classification system in different countries.  
20  
21 312 We applied modified IWGDF risk classification similar to the study of Iran [21] and Portugal  
22  
23 313 [11], where one of the two Indian [24] study applied semi-structured pre-tested questionnaire  
24  
25 314 and another [28] applied American Diabetic Association (ADA) task force report for  
26  
27 315 comprehensive foot examination risk classification.  
28  
29 316 Our study demonstrated gender-wise and area-wise difference in risk of DFU among T2D  
30  
31 317 population of Bangladesh. Overall proportion of DFU risk was higher among men than their  
32  
33 318 counterpart women and previous studies [7,21,24,31] also reported similar findings.  
34  
35 319 However, a community-based study of India reported that the DFU risk was high in women  
36  
37 320 [25], contradictory to our finding. Current study demonstrated that the risk of DFU was  
38  
39 321 greater among men with previous history of ulcer or amputation. This higher burden of foot  
40  
41 322 ulcer history or amputation in men was also supported by another study of Iran using IWGDF  
42  
43 323 risk classification system [21]. This men-to-women risk difference might be due to diabetes  
44  
45 324 related healthy behavioral practice, health seeking behavior and self-care. In this regard, a  
46  
47 325 Brazilian study reported that gender was significantly associated with changes of lifestyle  
48  
49 326 behavior that related to control of T2D, foot self-care and prevent ulceration, and women  
50  
51 327 were more adhere to lifestyle changes than men [32]. Same study also reported that men were  
52  
53  
54  
55  
56  
57  
58  
59  
60

1  
2  
3 328 highly reluctant to check their glycaemic status and lipid profile compared to women [31]. In  
4  
5 329 this case, the fact is that women are more sensitive to their health issues and more frequently  
6  
7  
8 330 seek health services than men [33,34].  
9

10 331 According to urban-rural difference, we found the risk was higher among those lived in a  
11  
12 332 rural area and this finding was also supported by other studies [24,29,35]. The possible  
13  
14 333 explanation included that the diabetic patients of rural area are not aware about their PN due  
15  
16 334 to illiteracy, especially lack of knowledge about diabetic foot related complications. Hence,  
17  
18 335 they used to barefoot walking that lead to injury to the foot and subsequent complications.  
19  
20 336 [36] Another explanation included that individuals in rural areas often sleep in huts or  
21  
22 337 farmhouses where rodents are common; rodent bites to the feet of the patients with diabetes  
23  
24 338 can lead to chronic ulcers [35].  
25  
26  
27

28 339 One of the major objectives of this study was to identify the predictors of DFU risk among  
29  
30 340 Bangladeshi T2D population. Sociodemographic predictors including age  $\geq 50$  years, living  
31  
32 341 in rural area and monthly income  $\leq 19,488$  BDT showed higher odds for the risk of DFU. In  
33  
34 342 diabetic research, age is widely evaluated as a predictor of DFU. Like our study, there are  
35  
36 343 some other studies that found age as a significant predictor [37-39]. In our study, age below  
37  
38 344 50 years was a protective factor and above this cut-off value was associated with  
39  
40 345 development of DFU, also supported by the other studies that reported older age was a  
41  
42 346 significant predictor [38,39]. Globally, findings about the association of economic status and  
43  
44 347 area of residence with the risk of DFU are inconsistent. Current study demonstrated lower  
45  
46 348 economic status (monthly income  $\leq 19,488$  BDT) and living in a rural area were the strong  
47  
48 349 predictors of DFU. This finding was consistent with the results of other studies conducted in  
49  
50 350 India [25,28] and Sri Lanka [40]. It has postulated that financial status is directly related to  
51  
52 351 burden of risk factors leading to complications of chronic diseases. This is because lack of  
53  
54 352 financial resources interferes in the access to healthcare services, options of treatments, and  
55  
56  
57  
58  
59  
60

1  
2  
3 353 hinders the adoption of preventive measures that are necessary to avoid amputations [32].  
4  
5 354 Regarding place of residence, significant urban-rural risk difference for DFU was explained  
6  
7 355 by the study of Viswanathan et al. and we mentioned it in this section previously [35].  
8  
9  
10 356 However, one study reported no association for the aforementioned predictors that concurred  
11  
12 357 with the current study [41].  
13  
14 358 Our study informed that the odds for risk of DFU were higher among insulin user, having  
15  
16 359 diabetic related complications as nephropathy and retinopathy. Previous studies also reported  
17  
18 360 that use of insulin is a predictor of diabetic foot [30,42]. However, exact mechanism has not  
19  
20 361 yet been explored and hence this finding is inconclusive. The possibility may include the fact  
21  
22 362 that when patients acquiesce to start insulin, they may already have diabetes for a long time  
23  
24 363 with greater associated complications [30]. Our findings of retinopathy and nephropathy were  
25  
26 364 also supported by other studies [21,39,43-44]. Regarding nephropathy, it has suggested that  
27  
28 365 about 10% of diabetic patient have a history of amputation when they entered into a dialysis  
29  
30 366 program [45]. Several factors responsible for increased risk of DFU among nephropathy  
31  
32 367 patients. They included co-existence of PN, peripheral vascular diseases, susceptibility to  
33  
34 368 infection, reduce self-care, dialysis therapy and anemia [46]. On the other hand, one study  
35  
36 369 reported that the prevalence of diabetic retinopathy was much higher (90%) among patients  
37  
38 370 with DFU than those had no DFU [43]. Another study [44] applied IWGDF risk classification  
39  
40 371 to predict DFU and they found that around 67.58% of patients had diabetic retinopathy and  
41  
42 372 they were included in the risk group 3, similar to our study. In this regard, a systematic  
43  
44 373 review and meta-analysis explained that both the retinopathy and nephropathy are  
45  
46 374 microvascular complications. The impairment of microcirculation in T2D may lead to  
47  
48 375 secondary complications in lower extremity due to dysfunctional vasodilatation. Moreover,  
49  
50 376 patients of diabetic foot with retinopathy have higher level of diabetic biomarkers like  
51  
52 377 ceruloplasmin. Again, this ceruloplasmin is an independent predictor of progression of  
53  
54  
55  
56  
57  
58  
59  
60

1  
2  
3 378 diabetic nephropathy in T2D patients. Thus, aforementioned explanation implied the link  
4  
5 379 among DFU, retinopathy and nephropathy [47].  
6

7  
8 380 Previous history of trauma was identified as a significant predictor of DFU (group 3A, OR  
9  
10 381 2.998,  $p < 0.001$ ; group 3B,  $p < 0.001$ ) in our study. This finding was similar with other  
11  
12 382 studies that reported significant association between previous history of trauma and DFU [48-  
13  
14 383 50]. However, the exact mechanism of previous trauma leading to DFU is not clear that  
15  
16 384 demands further research on this issue.

17  
18  
19 385 This study has some limitations that should be considered. First, the participating centers  
20  
21 386 were not representative of the Bangladesh diabetes centers as a whole, considering their  
22  
23 387 geographical distribution, as some areas were underrepresented or not represented at all. So,  
24  
25 388 the results of our study cannot be extrapolated to the general diabetic population in  
26  
27 389 Bangladesh. Second, in our study some diabetes related complications were  
28  
29 390 underrepresented, especially for diabetic retinopathy and nephropathy. These co-morbidities  
30  
31 391 were not based on real-time clinical examination of eyes and assessment of kidney functions,  
32  
33 392 rather based on diabetic record books review. In the similar way, glycaemic status was  
34  
35 393 evaluated using the values previously recorded in the diabetic record book instead of  
36  
37 394 biochemical measurement during data collection.

38  
39  
40 395 Other than these issues, this study was important from the public health and clinical  
41  
42 396 perspective. This was the first study of Bangladesh that predicted DFU risk in a moderately  
43  
44 397 large sample of T2D population. Moreover, it was a multi-centric study that recruited  
45  
46 398 respondents from world renowned DAB affiliated diabetes centers. The other strength of this  
47  
48 399 study was gender-wise and area-wise reporting of DFU risk among the study subjects. This  
49  
50 400 will help to address the gender and urban-rural disparities in diabetes foot care in Bangladesh  
51  
52 401 and remodeling of the chain of diabetes centers where appropriate. Finally, and most  
53  
54 402 importantly, first time we explored the predictors that influence the risk of DFU among  
55  
56  
57  
58  
59  
60

1  
2  
3 403 Bangladeshi T2D subjects. The clinicians of Bangladesh will concentrate more on these  
4  
5 404 predictors during diabetes patient management as they are associated with significant  
6  
7 405 morbidity and mortality resulting from DFU.  
8  
9

## 10 406 **Conclusions**

11  
12 407 Current study detected a significant proportion of T2D population of Bangladesh were at high  
13  
14 408 risk of DFU. This indicated that each and every diabetic patient must be screened for their  
15  
16 409 foot ulcer risk factors according to IWGDF recommendation. In this regard, diabetic foot  
17  
18 410 screening program can be introduced in primary health care system of Bangladesh. Based on  
19  
20 411 the findings of this study, we also recommend that specialized diabetic foot care center  
21  
22 412 should be established in both urban and rural area to stop the devastating consequences of  
23  
24 413 DFU.  
25  
26  
27

## 28 414 **Funding**

29  
30 415 This study was funded by the Norwegian Award for Masters Studies (NOMA) through  
31  
32 416 University of Oslo, Norway, awarded to Bangladesh Institute of Health Sciences,  
33  
34 417 Bangladesh.  
35  
36  
37

## 38 418 **Conflicts of Interest**

39  
40 419 All authors have none to declare.  
41  
42

## 43 420 **Data statement**

44  
45 421 Dataset is available in the supplementary file.  
46  
47

## 48 422 **Author Contributions**

49  
50 423 Conceptualization, Palash Chandra Banik and Liaquat Ali; Data curation, Palash Chandra  
51  
52 424 Banik and Rajib Mondal; Formal analysis, Palash Chandra Banik, Mohammad  
53  
54 425 Moniruzzaman and Lingkan Barua; Methodology, Farhana Zaman, Mohammad  
55  
56  
57  
58  
59  
60

1  
2  
3 426 Moniruzzaman and Liaquat Ali; Resources, Farhana Zaman and Rajib Mondal; Supervision,  
4  
5 427 Liaquat Ali; Writing – original draft, Lingkan Barua.  
6  
7

## 8 428 **Acknowledgments**

9  
10 429 The authors would like to thank the Head of the Department of Community Medicine, Prof.  
11  
12 430 Dr. MSA Mansur Ahmed for his kind cooperation to conduct the study and grateful to  
13  
14 431 Diabetic Association of Bangladesh (DAB) for allowing us for data collection from their  
15  
16  
17 432 chain diabetes care centers.  
18

19  
20 433  
21  
22  
23  
24  
25  
26  
27  
28  
29  
30  
31  
32  
33  
34  
35  
36  
37  
38  
39  
40  
41  
42  
43  
44  
45  
46  
47  
48  
49  
50  
51  
52  
53  
54  
55  
56  
57  
58  
59  
60

434 **References**

- 435 1. Wild S, Roglic G, Green A, Sicree R, King H. Global Prevalence of Diabetes: Estimates  
436 for the year 2000 and projections for 2030. *Diabetes Care* 2004;**27**:1047–53.  
437 doi:10.2337/diacare.27.5.1047.
- 438 2. Ogurtsova K, Fernandes JDR, Huang Y, Linnenkamp U, Guariguata L, Cho N, et al. IDF  
439 Diabetes Atlas: Global estimates for the prevalence of diabetes for 2015 and 2040.  
440 *Diabetes Research and Clinical Practice* 2017;**128**:40–50.  
441 doi:10.1016/j.diabres.2017.03.024.
- 442 3. Hutchinson A. *Clinical guidelines for type 2 diabetes: prevention and management of*  
443 *foot problems*. London: Royal College of General Practitioners; 2000.
- 444 4. Akter S, Rahman MM, Abe SK, Sultana P. Prevalence of diabetes and prediabetes and  
445 their risk factors among Bangladeshi adults: a nationwide survey. *Bulletin of the World*  
446 *Health Organization* 2014;**92**. doi:10.2471/blt.13.128371.
- 447 5. Saquib N, Saquib J, Ahmed T, Khanam MA, Cullen MR. Cardiovascular diseases and  
448 Type 2 Diabetes in Bangladesh: A systematic review and meta-analysis of studies  
449 between 1995 and 2010. *BMC Public Health* 2012;**12**. doi:10.1186/1471-2458-12-434.
- 450 6. Karthikesalingam A, Holt PJE, Moxey P, Jones KG, Thompson MM, Hinchliffe RJ. A  
451 systematic review of scoring systems for diabetic foot ulcers. *Diabetic Medicine* 2010;  
452 **27**:544–9. doi:10.1111/j.1464-5491.2010.02989.x.
- 453 7. Eleftheriadou I. *Atlas of the diabetic foot*. Hoboken, NJ, USA: Wiley-Blackwell; 2019.
- 454 8. Diabetic Foot Ulcers ,Ä Effects on QOL, Costs, and Mortality and the Role of Standard  
455 Wound Care and Advanced-Care Therapies. *Wound Management & Prevention*.  
456 [https://www.o-wm.com/content/diabetic-foot-ulcers—effects-qol-costs-and-mortality-](https://www.o-wm.com/content/diabetic-foot-ulcers—effects-qol-costs-and-mortality-and-role-standard-wound-care-and-adva)  
457 [and-role-standard-wound-care-and-adva](https://www.o-wm.com/content/diabetic-foot-ulcers—effects-qol-costs-and-mortality-and-role-standard-wound-care-and-adva) (accessed June 11, 2019).



- 1  
2  
3 458 9. Boyko E, Ahroni J, Smith D, Davignon D. Increased Mortality Associated with Diabetic  
4  
5 459 Foot Ulcer. *Diabetic Medicine* 1996;**13**:967–72. doi:10.1002/(sici)1096-  
6  
7 460 9136(199611)13:11<967::aid-dia266>3.3.co;2-b.
- 8  
9  
10 461 10. Boulton A, Armstrong D, Albert S, Frykberg R, Hellman R, Kirkman M, et al.  
11  
12 462 Comprehensive Foot Examination and Risk Assessment. *Endocrine Practice* 2008;**14**:  
13  
14 463 576–83. doi:10.4158/ep.14.5.576.
- 15  
16  
17 464 11. Abbott CA, Garrow AP, Carrington AL, Morris J, Ross ERV, Boulton AJ. Foot Ulcer  
18  
19 465 Risk Is Lower in South-Asian and African-Caribbean Compared With European Diabetic  
20  
21 466 Patients in the U.K.: The North-West Diabetes Foot Care Study. *Diabetes Care*  
22  
23 467 2005;**28**:1869–75. doi:10.2337/diacare.28.8.1869.
- 24  
25  
26 468 12. Chaturvedi N, Stevens L, Fuller J, Lee E, Lu M. Risk factors, ethnic differences and  
27  
28 469 mortality associated with lower-extremity gangrene and amputation in diabetes. The  
29  
30 470 WHO multinational study of vascular disease in diabetes. *Diabetologia* 2001;**44**.  
31  
32 471 doi:10.1007/pl00002941.
- 33  
34  
35 472 13. Mørkrid K, Ali L, Hussain A. Risk factors and prevalence of diabetic peripheral  
36  
37 473 neuropathy: A study of type 2 diabetic outpatients in Bangladesh. *International Journal*  
38  
39 474 *of Diabetes in Developing Countries* 2010;**30**:11. doi:10.4103/0973-3930.60004.
- 40  
41  
42 475 14. Akbari C, Logerfo. Vascular disease of the lower extremities in diabetes mellitus:  
43  
44 476 Etiology and management, In ‘*Joslin’s Diabetes mellitus*,’ 14th ed.; Kahn, C. Ronald;  
45  
46 477 Weir, Gordon C.; King, George L.; Moses, Alan C.; Smith, Robert J.; Jacobson, Alan  
47  
48 478 M.Lippincott Williams & Wilkins, USA. 2005:1124-1131.
- 49  
50  
51 479 15. Bonita R. *Surveillance of risk factors for noncommunicable diseases: the WHO*  
52  
53 480 *STEPwise approach: summary*. Geneva: Noncommunicable Disease and Mental Health,  
54  
55 481 World Health Organization 2001.
- 56  
57  
58  
59  
60

- 1  
2  
3 482 16. Non-Communicable Disease Risk Factor Survey Bangladesh 2010. Available:  
4  
5 483 [https://www.who.int/ncds/surveillance/steps/2010\\_STEPS\\_Report\\_Bangladesh.pdf](https://www.who.int/ncds/surveillance/steps/2010_STEPS_Report_Bangladesh.pdf)  
6  
7  
8 484 17. Lavery LA, Peters EJ, Williams JR, Murdoch DP, Hudson A, Lavery DC. Reevaluating  
9  
10 485 the Way We Classify the Diabetic Foot: Restructuring the diabetic foot risk classification  
11  
12 486 system of the International Working Group on the Diabetic Foot. *Diabetes Care* 2007;  
13  
14 487 **31**:154–6. doi:10.2337/dc07-1302.  
15  
16  
17 488 18. Lavery LA, Armstrong DG, Vela SA, Quebedeaux TL, Fleischli JG. Practical Criteria for  
18  
19 489 Screening Patients at High Risk for Diabetic Foot Ulceration. *Archives of Internal*  
20  
21 490 *Medicine* 1998;**158**:157. doi:10.1001/archinte.158.2.157.  
22  
23  
24 491 19. Lavery LA, Armstrong DG, Murdoch DP, Peters EJG, Lipsky BA. Validation of the  
25  
26 492 Infectious Diseases Society of Americas Diabetic Foot Infection Classification System.  
27  
28 493 *Clinical Infectious Diseases* 2007;**44**:562–5. doi:10.1086/511036.  
29  
30  
31 494 20. von Elm E, Altman DG, Egger M, Pocock SJ, Gotsche PC, Vandenbroucke JP. The  
32  
33 495 Strengthening the Reporting of Observational Studies in Epidemiology (STROBE)  
34  
35 496 Statement: guidelines for reporting observational studies. *Journal of Clinical*  
36  
37 497 *Epidemiology* 2008;**61**:344-9. doi: 10.1016/j.jclinepi.2007.11.008.  
38  
39  
40 498 21. Shahbazian H, Yazdanpanah L, Latifi SM. Risk assessment of patients with diabetes for  
41  
42 499 foot ulcers according to risk classification consensus of international working group on  
43  
44 500 diabetic foot (IWGDF). *Pakistan Journal of Medical Sciences* 2013;**29**.  
45  
46 501 doi:10.12669/pjms.293.3473.  
47  
48  
49 502 22. Monteiro-Soares M, Vaz-Carneiro A, Sampaio S, Dinis-Ribeiro M. Validation and  
50  
51 503 comparison of currently available stratification systems for patients with diabetes by risk  
52  
53 504 of foot ulcer development. *European Journal of Endocrinology* 2012;**167**:401–7.  
54  
55 505 doi:10.1530/eje-12-0279.  
56  
57  
58  
59  
60

- 1  
2  
3 506 23. Dubský M, Jirkovská A, Bem R, Fejfarová V, Skibová J, Schaper NC, et al. Risk factors  
4  
5 507 for recurrence of diabetic foot ulcers: prospective follow-up analysis in the Eurodiale  
6  
7 508 subgroup. *International Wound Journal* 2012;**10**:555–61. doi:10.1111/j.1742-  
8  
9 509 481x.2012.01022.x.
- 10  
11  
12 510 24. Naik BN, Srinivasan M, Reddy MM, Kanungo S, Sarkar S, Kar SS. Diabetes Foot Ulcer  
13  
14 511 Risk - A Public Health Concern in Rural Pondicherry!! *National Journal of Community*  
15  
16 512 *Medicine* 2018;**9**:755–9.
- 17  
18  
19 513 25. Vibha SP, Kulkarni MM, Ballala ABK, Kamath A, Maiya GA. Community based study  
20  
21 514 to assess the prevalence of diabetic foot syndrome and associated risk factors among  
22  
23 515 people with diabetes mellitus. *BMC Endocrine Disorders* 2018;**18**. doi:10.1186/s12902-  
24  
25 516 018-0270-2.
- 26  
27  
28 517 26. Peters EJ, Lavery LA. Effectiveness of the Diabetic Foot Risk Classification System of  
29  
30 518 the International Working Group on the Diabetic Foot. *Diabetes Care* 2001;**24**:1442–7.  
31  
32 519 doi:10.2337/diacare.24.8.1442.
- 33  
34  
35 520 27. Hunt, D. Diabetes: foot ulcers and amputations. *BMJ clinical evidence* 2009.
- 36  
37  
38 521 28. Jyotsna V, Kishore S, Upadhyay A. Categories of foot at risk in patients of diabetes at a  
39  
40 522 tertiary care center: Insights into need for foot care. *Indian Journal of Endocrinology and*  
41  
42 523 *Metabolism* 2015;**19**:405. doi:10.4103/2230-8210.152789.
- 43  
44  
45 524 29. A C, Valame S. Diabetic Foot Risk Assessment And Foot Care Among Patients  
46  
47 525 Attending Tertiary Care Hospital In Central India. *Journal of Evolution of Medical and*  
48  
49 526 *Dental Sciences* 2017;**6**:5153–8. doi:10.14260/jemds/2017/1119.
- 50  
51  
52 527 30. Yazdanpanah L, Shahbazian H, Nazari I, Arti HR, Ahmadi F, Mohammadianinejad SE,  
53  
54 528 et al. Incidence and Risk Factors of Diabetic Foot Ulcer: A Population-Based Diabetic  
55  
56 529 Foot Cohort (ADFC Study)—Two-Year Follow-Up Study. *International Journal of*  
57  
58 530 *Endocrinology* 2018;**2018**:1–9. doi:10.1155/2018/7631659.
- 59  
60

- 1  
2  
3 531 31. Kumar MS, Valame S. Risk Of Diabetic Foot In Diabetics With Micro And  
4  
5 532 Macrovascular Complications. *Journal of Evolution of Medical and Dental Sciences*  
6  
7 533 2014;**3**:14467–77. doi:10.14260/jemds/2014/3941.
- 8  
9  
10 534 32. Rossaneis MA, Maria Do Carmo Fernandez Lourenço Haddad, Mathias TADF, *et al.*  
11  
12 535 Differences in foot self-care and lifestyle between men and women with diabetes  
13  
14 536 mellitus. *Revista Latino-Americana de Enfermagem* 2016;**24**. doi:10.1590/1518-  
15  
16 537 8345.1203.2761
- 17  
18  
19 538 33. Mansyur CL, Rustveld LO, Nash SG, *et al.* Social factors and barriers to self-care  
20  
21 539 adherence in Hispanic men and women with diabetes. *Patient Education and Counseling*  
22  
23 540 2015;**98**:805–10. doi:10.1016/j.pec.2015.03.001
- 24  
25  
26 541 34. Tang Z-Q, Chen H-L, Zhao F-F. Gender Differences of Lower Extremity Amputation  
27  
28 542 Risk in Patients With Diabetic Foot. *The International Journal of Lower Extremity*  
29  
30 543 *Wounds* 2014;**13**:197–204. doi:10.1177/1534734614545872
- 31  
32  
33 544 35. Viswanathan V, Madhavan S, Rajasekar S, Chamukuttan S, Ambady R. Urban-Rural  
34  
35 545 Differences in the Prevalence of Foot Complications in South-Indian Diabetic Patients.  
36  
37 546 *Diabetes Care* 2006;**29**:701–3. doi:10.2337/diacare.29.03.06.dc05-1777.
- 38  
39  
40 547 36. Vijay V, Snehalatha C, Ramachandran A. Socio cultural practices that may affect the  
41  
42 548 development of the diabetic foot. *IDF Bulletin* 1997;**42**:10–12.
- 43  
44  
45 549 37. Armstrong DG, Holtz-Neiderer K, Wendel C, Mohler MJ, Kimbriel HR, Lavery LA.  
46  
47 550 Skin Temperature Monitoring Reduces the Risk for Diabetic Foot Ulceration in High-  
48  
49 551 risk Patients. *The American Journal of Medicine* 2007;**120**:1042–6.  
50  
51 552 doi:10.1016/j.amjmed.2007.06.028.
- 52  
53  
54 553 38. Monami M, Vivarelli M, Desideri CM, Colombi C, Marchionni N, Mannucci E. Pulse  
55  
56 554 Pressure and Prediction of Incident Foot Ulcers in Type 2 Diabetes. *Diabetes Care* 2009;  
57  
58 555 **32**:897–9. doi:10.2337/dc08-1679.
- 59  
60

- 1  
2  
3 556 39. Margolis DJ, Hofstad O, Feldman HI. Association Between Renal Failure and Foot Ulcer  
4  
5 557 or Lower-Extremity Amputation in Patients With Diabetes. *Diabetes Care* 2008;  
6  
7 558 **31**:1331–6. doi:10.2337/dc07-2244.
- 9  
10 559 40. Sriyani KA, Wasalathanthri S, Hettiarachchi P, *et al.* Predictors of Diabetic Foot and Leg  
11  
12 560 Ulcers in a Developing Country with a Rapid Increase in the Prevalence of Diabetes  
13  
14 561 Mellitus. *PLoS ONE* 2013;**8**. doi:10.1371/journal.pone.0080856
- 16  
17 562 41. Sriussadaporn S, Mekanandha P, Vannasaeng S, Nitiyanant W, Komoltri C, Ploybutr S,  
18  
19 563 et al. Factors Associated with Diabetic Foot Ulceration in Thailand: a Case-control  
20  
21 564 Study. *Diabetic Medicine* 1997;**14**:50–6. doi:10.1002/(sici)1096-  
22  
23 565 9136(199701)14:1<50::aid-dia292>3.0.co;2-6.
- 25  
26 566 42. Monteiro-Soares M, Boyko EJ, Ribeiro J, *et al.* Predictive factors for diabetic foot  
27  
28 567 ulceration: a systematic review. *Diabetes/Metabolism Research and Reviews*  
29  
30 568 2012;**28**:574–600. doi:10.1002/dmrr.2319
- 32  
33 569 43. Hwang DJ, Lee KM, Park MS, Choi SH, Park JI, Cho JH, et al. Association between  
34  
35 570 diabetic foot ulcer and diabetic retinopathy. *Plos One* 2017;**12**.  
36  
37 571 doi:10.1371/journal.pone.0175270.
- 39  
40 572 44. Kamath Y, Karam T, Rao L, Rao K, Shenoy S, Bhandary S. Diabetic retinopathy in  
41  
42 573 patients with diabetic foot syndrome in South India. *Indian Journal of Ophthalmology*  
43  
44 574 2018;**66**:547. doi:10.4103/ijo.ijo\_1000\_17.
- 46  
47 575 45. Papanas N, Liakopoulos V, Maltezos E, Stefanidis I. The Diabetic Foot in End Stage  
48  
49 576 Renal Disease. *Renal Failure* 2007;**29**:519–28. doi:10.1080/08860220701391662.
- 51  
52 577 46. Valabhji J. Foot Problems In Patients With Diabetes And Chronic Kidney Disease.  
53  
54 578 *Journal of Renal Care* 2012;**38**:99–108. doi:10.1111/j.1755-6686.2012.00284.x.
- 55  
56  
57  
58  
59  
60

- 1  
2  
3 579 47. Zhang P, Lu J, Jing Y, *et al.* Global epidemiology of diabetic foot ulceration: a  
4  
5 580 systematic review and meta-analysis. *Annals of Medicine* 2016;**49**:106–16.  
6  
7 581 doi:10.1080/07853890.2016.1231932  
8  
9  
10 582 48. Nongmaithem M, Bawa AP, Pithwa A, Bhatia S, Singh G, Gooptu S. A study of risk  
11  
12 583 factors and foot care behavior among diabetics. *Journal of Family Medicine and Primary*  
13  
14 584 *Care* 2016;**5**:399. doi:10.4103/2249-4863.192340.  
15  
16  
17 585 49. Sharma DM, Sharma DA, Gothwal DSR, Dixit DS, Lunia DAK, Sharma DM. Diabetic  
18  
19 586 Foot Ulcers: A Prospective Study Of 100 Patients Based On Wound Based Severity  
20  
21 587 Score. *IOSR Journal of Dental and Medical Sciences* 2014;**13**:79–89. doi:10.9790/0853-  
22  
23 588 13187989.  
24  
25  
26 589 50. Nyamu P, Otieno C, Amayo E, Mcligeyo S. Risk factors and prevalence of diabetic foot  
27  
28 590 ulcers at Kenyatta National Hospital, Nairobi. *East African Medical Journal* 2004;**80**.  
29  
30 591 doi:10.4314/eamj.v80i1.8664.  
31  
32

33 592

34 593

35 594

36 595

37

38

39

40

41

42

43

44

45

46

47

48

49

50

51

52

53

54

55

56

57

58

59

60

|    | id | Center | Q1_age | Q1a_sex | rec_area | rec_edu | rec_occ | rec_marr | Q8_fam_inc |
|----|----|--------|--------|---------|----------|---------|---------|----------|------------|
| 1  |    |        |        |         |          |         |         |          |            |
| 2  |    |        |        |         |          |         |         |          |            |
| 3  | 1  | 1      | 70     | 2       | 1        | 2       | 2       | 1        | 20000      |
| 4  | 2  | 1      | 55     | 2       | 2        | 3       | 3       | 1        | 5000       |
| 5  | 3  | 1      | 35     | 2       | 1        | 4       | 1       | 1        | 15000      |
| 6  | 4  | 1      | 57     | 2       | 1        | 3       | 3       | 1        | 35000      |
| 7  | 5  | 1      | 57     | 2       | 1        | 3       | 3       | 1        | 10000      |
| 8  | 6  | 1      | 50     | 2       | 1        | 2       | 3       | 1        | 20000      |
| 9  | 7  | 1      | 56     | 2       | 1        | 1       | 3       | 1        | 40000      |
| 10 | 8  | 1      | 55     | 2       | 1        | 2       | 3       | 1        | 50000      |
| 11 | 9  | 1      | 70     | 2       | 1        | 2       | 3       | 1        | 20000      |
| 12 | 10 | 1      | 75     | 2       | 1        | 2       | 3       | 1        | 50000      |
| 13 | 11 | 1      | 65     | 2       | 1        | 2       | 3       | 1        | 20000      |
| 14 | 12 | 1      | 60     | 2       | 1        | 2       | 3       | 1        | 10000      |
| 15 | 13 | 1      | 45     | 1       | 1        | 4       | 1       | 1        | 30000      |
| 16 | 14 | 1      | 58     | 2       | 1        | 3       | 3       | 1        | 60000      |
| 17 | 15 | 1      | 47     | 2       | 2        | 1       | 3       | 1        | 6000       |
| 18 | 16 | 1      | 62     | 1       | 1        | 4       | 1       | 1        | 100000     |
| 19 | 17 | 1      | 45     | 1       | 1        | 4       | 1       | 1        | 15000      |
| 20 | 18 | 1      | 34     | 1       | 2        | 2       | 4       | 1        | 6000       |
| 21 | 19 | 1      | 68     | 1       | 1        | 3       | 1       | 1        | 65000      |
| 22 | 20 | 1      | 58     | 1       | 1        | 4       | 2       | 1        | 100000     |
| 23 | 21 | 1      | 60     | 1       | 1        | 2       | 4       | 1        | 10000      |
| 24 | 22 | 1      | 51     | 2       | 2        | 2       | 3       | 1        | 6000       |
| 25 | 23 | 1      | 53     | 1       | 1        | 3       | 2       | 1        | 20000      |
| 26 | 24 | 1      | 70     | 1       | 1        | 4       | 1       | 1        | 35000      |
| 27 | 25 | 1      | 70     | 1       | 1        | 2       | 1       | 1        | 3000       |
| 28 | 26 | 1      | 27     | 1       | 1        | 4       | 1       | 1        | 8000       |
| 29 | 27 | 1      | 60     | 1       | 1        | 2       | 1       | 1        | 15000      |
| 30 | 28 | 1      | 73     | 1       | 1        | 4       | 1       | 1        | 30000      |
| 31 | 29 | 1      | 55     | 1       | 2        | 2       | 1       | 1        | 15000      |
| 32 | 30 | 1      | 55     | 1       | 1        | 4       | 2       | 1        | 15000      |
| 33 | 31 | 1      | 44     | 1       | 1        | 2       | 2       | 1        | 20000      |
| 34 | 32 | 1      | 50     | 1       | 1        | 4       | 4       | 1        | 30000      |
| 35 | 33 | 1      | 67     | 1       | 1        | 4       | 1       | 1        | 15000      |
| 36 | 34 | 1      | 77     | 1       | 1        | 2       | 4       | 1        | 30000      |
| 37 | 35 | 1      | 44     | 1       | 1        | 4       | 1       | 1        | 20000      |
| 38 | 36 | 1      | 40     | 1       | 2        | 4       | 1       | 1        | 4000       |
| 39 | 37 | 1      | 80     | 1       | 1        | 4       | 1       | 1        | 500000     |
| 40 | 38 | 1      | 63     | 1       | 1        | 2       | 1       | 1        | 22000      |
| 41 | 39 | 1      | 50     | 1       | 1        | 3       | 2       | 1        | 30000      |
| 42 | 40 | 1      | 50     | 1       | 1        | 4       | 1       | 1        | 40000      |
| 43 | 41 | 1      | 50     | 1       | 1        | 4       | 1       | 1        | 750000     |
| 44 | 42 | 1      | 80     | 1       | 1        | 3       | 1       | 1        | 6000       |
| 45 | 43 | 1      | 50     | 1       | 2        | 3       | 1       | 1        | 2000       |
| 46 | 44 | 1      | 48     | 1       | 1        | 4       | 1       | 1        | 7000       |
| 47 | 45 | 1      | 72     | 1       | 1        | 3       | 1       | 1        | 30000      |
| 48 | 46 | 1      | 58     | 1       | 1        | 2       | 2       | 1        | 90000      |
| 49 | 47 | 1      | 59     | 1       | 1        | 3       | 1       | 1        | 35000      |
| 50 | 48 | 1      | 65     | 1       | 1        | 4       | 1       | 1        | 35000      |
| 51 | 49 | 1      | 54     | 1       | 1        | 2       | 4       | 1        | 50000      |

|    |    |   |    |   |   |   |   |   |        |
|----|----|---|----|---|---|---|---|---|--------|
| 1  |    |   |    |   |   |   |   |   |        |
| 2  | 50 | 1 | 58 | 1 | 1 | 2 | 4 | 1 | 20000  |
| 3  | 51 | 1 | 67 | 1 | 1 | 4 | 1 | 1 | 40000  |
| 4  | 52 | 1 | 50 | 1 | 1 | 4 | 1 | 1 | 20000  |
| 5  | 53 | 1 | 65 | 1 | 1 | 4 | 2 | 1 | 40000  |
| 6  | 54 | 1 | 78 | 1 | 1 | 4 | 1 | 1 | 20000  |
| 7  | 55 | 1 | 55 | 1 | 1 | 4 | 1 | 1 | 70000  |
| 8  | 56 | 1 | 41 | 1 | 1 | 4 | 4 | 1 | 90000  |
| 9  | 57 | 1 | 75 | 1 | 1 | 4 | 2 | 1 | 5000   |
| 10 | 58 | 1 | 76 | 1 | 1 | 4 | 1 | 1 | 40000  |
| 11 | 59 | 1 | 52 | 1 | 1 | 4 | 1 | 1 | 15000  |
| 12 | 60 | 1 | 51 | 1 | 2 | 3 | 2 | 1 | 12000  |
| 13 | 61 | 1 | 63 | 1 | 1 | 2 | 1 | 1 | 50000  |
| 14 | 62 | 1 | 68 | 1 | 1 | 4 | 1 | 1 | 65000  |
| 15 | 63 | 1 | 58 | 1 | 1 | 2 | 2 | 1 | 100000 |
| 16 | 64 | 1 | 62 | 1 | 1 | 4 | 1 | 1 | 60000  |
| 17 | 65 | 1 | 50 | 1 | 1 | 3 | 1 | 1 | 10000  |
| 18 | 66 | 1 | 65 | 1 | 1 | 3 | 1 | 1 | 20000  |
| 19 | 67 | 1 | 61 | 1 | 1 | 3 | 4 | 1 | 100000 |
| 20 | 68 | 1 | 66 | 1 | 1 | 2 | 2 | 1 | 35000  |
| 21 | 69 | 1 | 40 | 1 | 1 | 3 | 2 | 1 | 7000   |
| 22 | 70 | 1 | 48 | 1 | 1 | 4 | 4 | 1 | 20000  |
| 23 | 71 | 1 | 37 | 2 | 2 | 2 | 3 | 1 | 5000   |
| 24 | 72 | 1 | 42 | 2 | 1 | 2 | 3 | 1 | 30000  |
| 25 | 73 | 1 | 63 | 2 | 1 | 2 | 3 | 1 | 30000  |
| 26 | 74 | 1 | 56 | 2 | 1 | 2 | 3 | 1 | 35000  |
| 27 | 75 | 1 | 70 | 2 | 1 | 3 | 3 | 1 | 50000  |
| 28 | 76 | 1 | 50 | 2 | 2 | 1 | 3 | 1 | 30000  |
| 29 | 77 | 1 | 71 | 2 | 1 | 2 | 3 | 1 | 30000  |
| 30 | 78 | 1 | 70 | 2 | 1 | 2 | 3 | 1 | 20000  |
| 31 | 79 | 1 | 58 | 2 | 1 | 4 | 3 | 1 | 25000  |
| 32 | 80 | 1 | 70 | 1 | 1 | 2 | 3 | 1 | 30000  |
| 33 | 81 | 1 | 44 | 2 | 1 | 1 | 4 | 1 | 15000  |
| 34 | 82 | 1 | 55 | 2 | 1 | 4 | 1 | 1 | 10000  |
| 35 | 83 | 1 | 41 | 2 | 1 | 4 | 1 | 1 | 100000 |
| 36 | 84 | 1 | 52 | 2 | 1 | 2 | 3 | 1 | 20000  |
| 37 | 85 | 1 | 52 | 2 | 1 | 2 | 3 | 1 | 30000  |
| 38 | 86 | 1 | 55 | 2 | 1 | 4 | 1 | 1 | 5000   |
| 39 | 87 | 1 | 55 | 2 | 1 | 2 | 1 | 1 | 6000   |
| 40 | 88 | 1 | 50 | 2 | 1 | 3 | 3 | 1 | 100000 |
| 41 | 89 | 1 | 59 | 2 | 1 | 3 | 3 | 1 | 60000  |
| 42 | 90 | 1 | 52 | 2 | 2 | 2 | 3 | 1 | 20000  |
| 43 | 91 | 1 | 42 | 2 | 2 | 3 | 1 | 1 | 5000   |
| 44 | 92 | 1 | 56 | 2 | 1 | 2 | 3 | 1 | 12000  |
| 45 | 93 | 1 | 50 | 2 | 1 | 4 | 1 | 1 | 50000  |
| 46 | 94 | 1 | 33 | 2 | 1 | 3 | 3 | 1 | 40000  |
| 47 | 95 | 1 | 52 | 2 | 1 | 2 | 3 | 1 | 70000  |
| 48 | 96 | 1 | 55 | 2 | 1 | 2 | 3 | 1 | 25000  |
| 49 | 97 | 1 | 45 | 2 | 2 | 2 | 3 | 1 | 50000  |
| 50 | 98 | 1 | 65 | 2 | 1 | 2 | 3 | 1 | 40000  |
| 51 | 99 | 1 | 58 | 2 | 1 | 3 | 3 | 1 | 25000  |



|    |     |   |    |   |   |   |   |   |        |
|----|-----|---|----|---|---|---|---|---|--------|
| 1  |     |   |    |   |   |   |   |   |        |
| 2  | 100 | 1 | 45 | 2 | 1 | 3 | 3 | 1 | 15000  |
| 3  | 101 | 1 | 57 | 2 | 1 | 2 | 3 | 1 | 70000  |
| 4  | 102 | 1 | 30 | 2 | 1 | 2 | 3 | 1 | 15000  |
| 5  | 103 | 1 | 52 | 2 | 1 | 1 | 3 | 1 | 10000  |
| 6  | 104 | 1 | 47 | 2 | 1 | 2 | 3 | 1 | 8000   |
| 8  | 105 | 1 | 68 | 2 | 1 | 1 | 4 | 1 | 30000  |
| 9  | 106 | 1 | 42 | 2 | 2 | 3 | 3 | 1 | 10000  |
| 10 | 107 | 1 | 68 | 2 | 1 | 4 | 3 | 1 | 40000  |
| 11 | 108 | 1 | 43 | 2 | 1 | 2 | 3 | 1 | 15000  |
| 12 | 109 | 1 | 65 | 2 | 2 | 1 | 3 | 1 | 10000  |
| 13 | 110 | 1 | 71 | 2 | 1 | 3 | 1 | 1 | 20000  |
| 15 | 111 | 1 | 50 | 2 | 1 | 2 | 3 | 1 | 40000  |
| 16 | 112 | 1 | 70 | 2 | 1 | 2 | 3 | 1 | 10000  |
| 17 | 113 | 1 | 65 | 2 | 2 | 1 | 3 | 1 | 7000   |
| 18 | 114 | 1 | 35 | 2 | 1 | 1 | 3 | 1 | 40000  |
| 19 | 115 | 1 | 32 | 2 | 1 | 2 | 3 | 1 | 60000  |
| 20 | 116 | 1 | 45 | 2 | 1 | 1 | 3 | 1 | 40000  |
| 21 | 117 | 1 | 65 | 2 | 1 | 3 | 3 | 1 | 30000  |
| 22 | 118 | 1 | 64 | 2 | 1 | 2 | 3 | 1 | 30000  |
| 23 | 119 | 1 | 60 | 2 | 1 | 3 | 3 | 1 | 30000  |
| 24 | 120 | 1 | 52 | 2 | 1 | 2 | 3 | 1 | 30000  |
| 25 | 121 | 1 | 45 | 2 | 1 | 2 | 3 | 1 | 10000  |
| 26 | 122 | 1 | 45 | 2 | 1 | 2 | 3 | 1 | 25000  |
| 27 | 123 | 1 | 40 | 2 | 1 | 2 | 3 | 1 | 20000  |
| 28 | 124 | 1 | 32 | 2 | 1 | 4 | 1 | 1 | 22000  |
| 29 | 125 | 1 | 75 | 2 | 1 | 2 | 3 | 1 | 20000  |
| 30 | 126 | 1 | 50 | 2 | 1 | 2 | 3 | 1 | 20000  |
| 31 | 127 | 1 | 68 | 2 | 2 | 2 | 3 | 1 | 30000  |
| 32 | 128 | 1 | 60 | 2 | 1 | 2 | 3 | 1 | 100000 |
| 33 | 129 | 1 | 50 | 2 | 1 | 2 | 3 | 1 | 80000  |
| 34 | 130 | 1 | 45 | 2 | 1 | 3 | 3 | 1 | 5000   |
| 35 | 131 | 1 | 61 | 2 | 1 | 2 | 3 | 1 | 12000  |
| 36 | 132 | 1 | 55 | 2 | 1 | 3 | 3 | 1 | 10000  |
| 37 | 133 | 1 | 50 | 2 | 1 | 3 | 3 | 1 | 5000   |
| 38 | 134 | 1 | 45 | 2 | 1 | 2 | 3 | 1 | 25000  |
| 39 | 135 | 1 | 45 | 2 | 1 | 2 | 3 | 1 | 20000  |
| 40 | 136 | 1 | 52 | 2 | 1 | 3 | 3 | 1 | 30000  |
| 41 | 137 | 1 | 62 | 2 | 1 | 2 | 3 | 1 | 50000  |
| 42 | 138 | 1 | 62 | 2 | 1 | 2 | 3 | 1 | 30000  |
| 43 | 139 | 1 | 82 | 2 | 1 | 2 | 3 | 1 | 100000 |
| 44 | 140 | 1 | 60 | 2 | 1 | 3 | 3 | 1 | 50000  |
| 45 | 141 | 1 | 59 | 2 | 1 | 3 | 3 | 1 | 25000  |
| 46 | 142 | 1 | 57 | 2 | 1 | 2 | 3 | 1 | 28000  |
| 47 | 143 | 1 | 60 | 2 | 1 | 2 | 3 | 1 | 20000  |
| 48 | 144 | 1 | 55 | 2 | 1 | 3 | 3 | 1 | 8000   |
| 49 | 145 | 1 | 50 | 2 | 1 | 3 | 3 | 1 | 30000  |
| 50 | 146 | 1 | 50 | 2 | 1 | 3 | 3 | 1 | 15000  |
| 51 | 147 | 1 | 55 | 2 | 1 | 4 | 1 | 1 | 25000  |
| 52 | 148 | 1 | 75 | 2 | 1 | 4 | 4 | 1 | 8000   |
| 53 | 149 | 1 | 50 | 2 | 1 | 2 | 3 | 1 | 30000  |

|    |     |   |    |   |   |   |   |   |        |
|----|-----|---|----|---|---|---|---|---|--------|
| 1  |     |   |    |   |   |   |   |   |        |
| 2  | 150 | 1 | 44 | 2 | 1 | 3 | 3 | 1 | 25000  |
| 3  | 151 | 1 | 37 | 2 | 1 | 2 | 3 | 1 | 15000  |
| 4  | 152 | 1 | 40 | 2 | 1 | 1 | 3 | 1 | 7000   |
| 5  | 153 | 1 | 85 | 2 | 1 | 2 | 3 | 1 | 100000 |
| 6  | 154 | 1 | 43 | 2 | 1 | 3 | 4 | 1 | 13000  |
| 7  | 155 | 1 | 65 | 2 | 1 | 2 | 3 | 1 | 30000  |
| 8  | 156 | 1 | 63 | 2 | 1 | 2 | 3 | 1 | 25000  |
| 9  | 157 | 1 | 55 | 2 | 1 | 3 | 3 | 1 | 30000  |
| 10 | 158 | 1 | 53 | 2 | 1 | 2 | 3 | 1 | 20000  |
| 11 | 159 | 1 | 62 | 2 | 1 | 2 | 3 | 1 | 15000  |
| 12 | 160 | 1 | 65 | 2 | 1 | 4 | 3 | 1 | 7000   |
| 13 | 161 | 1 | 34 | 2 | 1 | 4 | 3 | 1 | 20000  |
| 14 | 162 | 1 | 63 | 2 | 1 | 3 | 3 | 1 | 60000  |
| 15 | 163 | 1 | 60 | 2 | 1 | 2 | 3 | 1 | 30000  |
| 16 | 164 | 1 | 43 | 2 | 1 | 2 | 3 | 1 | 60000  |
| 17 | 165 | 1 | 65 | 2 | 1 | 2 | 3 | 1 | 40000  |
| 18 | 166 | 1 | 56 | 2 | 1 | 4 | 3 | 1 | 20000  |
| 19 | 167 | 1 | 40 | 2 | 1 | 2 | 3 | 1 | 50000  |
| 20 | 168 | 1 | 40 | 2 | 1 | 4 | 3 | 1 | 20000  |
| 21 | 169 | 1 | 55 | 2 | 1 | 2 | 3 | 1 | 5000   |
| 22 | 170 | 1 | 66 | 2 | 1 | 3 | 3 | 1 | 30000  |
| 23 | 171 | 1 | 70 | 2 | 1 | 4 | 3 | 1 | 50000  |
| 24 | 172 | 1 | 47 | 2 | 1 | 3 | 3 | 1 | 7000   |
| 25 | 173 | 1 | 45 | 2 | 1 | 1 | 3 | 1 | 30000  |
| 26 | 174 | 1 | 36 | 2 | 1 | 3 | 3 | 1 | 13000  |
| 27 | 175 | 1 | 52 | 2 | 1 | 2 | 3 | 1 | 30000  |
| 28 | 176 | 1 | 57 | 2 | 1 | 3 | 3 | 1 | 20000  |
| 29 | 177 | 1 | 20 | 2 | 1 | 3 | 3 | 1 | 20000  |
| 30 | 178 | 1 | 50 | 2 | 1 | 4 | 1 | 1 | 60000  |
| 31 | 179 | 1 | 57 | 2 | 1 | 4 | 3 | 1 | 25000  |
| 32 | 180 | 1 | 40 | 2 | 1 | 4 | 1 | 1 | 30000  |
| 33 | 181 | 1 | 51 | 2 | 1 | 2 | 3 | 1 | 30000  |
| 34 | 182 | 1 | 50 | 2 | 1 | 4 | 3 | 1 | 40000  |
| 35 | 183 | 1 | 45 | 2 | 1 | 3 | 3 | 1 | 30000  |
| 36 | 184 | 1 | 40 | 2 | 1 | 3 | 3 | 1 | 30000  |
| 37 | 185 | 1 | 62 | 2 | 1 | 3 | 3 | 1 | 115000 |
| 38 | 186 | 1 | 38 | 2 | 1 | 3 | 3 | 1 | 12000  |
| 39 | 187 | 1 | 52 | 2 | 1 | 2 | 3 | 1 | 30000  |
| 40 | 188 | 1 | 50 | 2 | 1 | 2 | 3 | 1 | 25000  |
| 41 | 189 | 1 | 65 | 2 | 1 | 3 | 3 | 1 | 60000  |
| 42 | 190 | 1 | 55 | 2 | 1 | 2 | 3 | 1 | 50000  |
| 43 | 191 | 1 | 50 | 2 | 1 | 1 | 3 | 1 | 15000  |
| 44 | 192 | 1 | 65 | 2 | 2 | 2 | 3 | 1 | 60000  |
| 45 | 193 | 1 | 50 | 2 | 1 | 2 | 3 | 1 | 50000  |
| 46 | 194 | 1 | 46 | 2 | 1 | 4 | 1 | 1 | 70000  |
| 47 | 195 | 1 | 51 | 2 | 1 | 3 | 3 | 1 | 55000  |
| 48 | 196 | 1 | 60 | 2 | 1 | 2 | 3 | 1 | 15000  |
| 49 | 197 | 1 | 55 | 2 | 1 | 2 | 3 | 1 | 30000  |
| 50 | 198 | 1 | 48 | 2 | 1 | 3 | 3 | 1 | 35000  |
| 51 | 199 | 1 | 65 | 2 | 1 | 4 | 2 | 1 | 20000  |

|    |     |   |    |   |   |   |   |   |        |
|----|-----|---|----|---|---|---|---|---|--------|
| 1  |     |   |    |   |   |   |   |   |        |
| 2  | 200 | 1 | 56 | 2 | 1 | 1 | 3 | 1 | 30000  |
| 3  | 201 | 1 | 34 | 2 | 1 | 3 | 4 | 1 | 20000  |
| 4  | 202 | 1 | 46 | 2 | 1 | 3 | 3 | 1 | 75000  |
| 5  | 203 | 1 | 56 | 2 | 2 | 1 | 4 | 1 | 10000  |
| 6  | 204 | 1 | 58 | 2 | 1 | 2 | 3 | 1 | 200000 |
| 8  | 205 | 1 | 30 | 2 | 1 | 4 | 1 | 1 | 30000  |
| 9  | 206 | 1 | 47 | 2 | 1 | 3 | 3 | 1 | 35000  |
| 10 | 207 | 1 | 62 | 2 | 1 | 2 | 3 | 1 | 20000  |
| 11 | 208 | 1 | 57 | 2 | 1 | 3 | 3 | 1 | 20000  |
| 12 | 209 | 1 | 37 | 2 | 1 | 4 | 3 | 1 | 30000  |
| 14 | 210 | 1 | 35 | 2 | 1 | 3 | 3 | 1 | 5000   |
| 15 | 211 | 1 | 47 | 2 | 1 | 2 | 3 | 1 | 40000  |
| 16 | 212 | 1 | 50 | 2 | 1 | 4 | 3 | 1 | 50000  |
| 17 | 213 | 1 | 50 | 1 | 1 | 3 | 2 | 1 | 50000  |
| 18 | 214 | 1 | 50 | 1 | 1 | 4 | 1 | 1 | 50000  |
| 20 | 215 | 1 | 45 | 1 | 1 | 4 | 4 | 1 | 35000  |
| 21 | 216 | 1 | 61 | 1 | 1 | 1 | 2 | 1 | 40000  |
| 22 | 217 | 1 | 41 | 1 | 1 | 3 | 4 | 1 | 15000  |
| 23 | 218 | 1 | 32 | 1 | 1 | 4 | 1 | 1 | 200000 |
| 24 | 219 | 1 | 65 | 1 | 1 | 3 | 1 | 1 | 100000 |
| 25 | 220 | 1 | 35 | 1 | 1 | 2 | 2 | 1 | 30000  |
| 27 | 221 | 1 | 45 | 1 | 1 | 4 | 1 | 1 | 50000  |
| 28 | 222 | 1 | 50 | 1 | 1 | 4 | 4 | 1 | 20000  |
| 29 | 223 | 1 | 48 | 1 | 1 | 4 | 1 | 1 | 10000  |
| 30 | 224 | 1 | 65 | 1 | 1 | 4 | 1 | 1 | 40000  |
| 31 | 225 | 1 | 35 | 1 | 1 | 3 | 1 | 1 | 6000   |
| 32 | 226 | 1 | 50 | 1 | 1 | 3 | 1 | 1 | 10000  |
| 34 | 227 | 1 | 42 | 1 | 1 | 4 | 2 | 1 | 20000  |
| 35 | 228 | 1 | 38 | 1 | 1 | 3 | 1 | 1 | 30000  |
| 36 | 229 | 1 | 30 | 1 | 1 | 4 | 4 | 1 | 10000  |
| 38 | 230 | 1 | 48 | 1 | 1 | 4 | 1 | 1 | 30000  |
| 39 | 231 | 1 | 40 | 1 | 1 | 4 | 1 | 1 | 35000  |
| 40 | 232 | 1 | 30 | 1 | 1 | 3 | 1 | 1 | 30000  |
| 41 | 233 | 1 | 63 | 1 | 1 | 3 | 2 | 1 | 20000  |
| 42 | 234 | 1 | 48 | 1 | 1 | 4 | 1 | 1 | 30000  |
| 44 | 235 | 1 | 52 | 1 | 1 | 4 | 1 | 2 | 20000  |
| 45 | 236 | 1 | 45 | 1 | 1 | 2 | 4 | 1 | 10000  |
| 46 | 237 | 1 | 38 | 1 | 1 | 4 | 1 | 1 | 15000  |
| 47 | 238 | 1 | 54 | 1 | 1 | 4 | 2 | 1 | 16000  |
| 48 | 239 | 1 | 43 | 1 | 1 | 4 | 4 | 1 | 25000  |
| 49 | 240 | 1 | 70 | 1 | 1 | 3 | 1 | 1 | 90000  |
| 50 | 241 | 1 | 32 | 1 | 1 | 4 | 4 | 1 | 5000   |
| 51 | 242 | 1 | 52 | 1 | 1 | 2 | 2 | 1 | 40000  |
| 52 | 243 | 1 | 55 | 1 | 1 | 3 | 1 | 1 | 60000  |
| 53 | 244 | 1 | 65 | 1 | 1 | 3 | 1 | 1 | 30000  |
| 54 | 245 | 1 | 48 | 1 | 1 | 3 | 2 | 1 | 40000  |
| 55 | 246 | 1 | 50 | 1 | 1 | 2 | 2 | 1 | 20000  |
| 56 | 247 | 1 | 41 | 1 | 1 | 4 | 1 | 1 | 30000  |
| 57 | 248 | 1 | 70 | 1 | 1 | 4 | 1 | 1 | 50000  |
| 58 | 249 | 1 | 70 | 1 | 1 | 3 | 2 | 1 | 50000  |

|    |     |   |    |   |   |   |   |   |        |
|----|-----|---|----|---|---|---|---|---|--------|
| 1  |     |   |    |   |   |   |   |   |        |
| 2  | 250 | 1 | 45 | 1 | 1 | 2 | 2 | 1 | 9000   |
| 3  | 251 | 1 | 40 | 1 | 1 | 4 | 3 | 1 | 20000  |
| 4  | 252 | 1 | 52 | 1 | 1 | 3 | 3 | 1 | 90000  |
| 5  | 253 | 1 | 36 | 1 | 1 | 2 | 3 | 1 | 20000  |
| 6  | 254 | 1 | 25 | 1 | 1 | 4 | 3 | 1 | 40000  |
| 7  | 255 | 1 | 45 | 1 | 1 | 3 | 2 | 1 | 30000  |
| 8  | 256 | 1 | 67 | 1 | 1 | 4 | 1 | 1 | 20000  |
| 9  | 257 | 1 | 65 | 1 | 1 | 4 | 4 | 1 | 30000  |
| 10 | 258 | 1 | 58 | 1 | 1 | 1 | 2 | 1 | 20000  |
| 11 | 259 | 1 | 48 | 1 | 1 | 3 | 4 | 1 | 45000  |
| 12 | 260 | 1 | 58 | 1 | 1 | 2 | 2 | 1 | 50000  |
| 13 | 261 | 1 | 54 | 1 | 1 | 4 | 3 | 1 | 2000   |
| 14 | 262 | 1 | 45 | 1 | 1 | 3 | 3 | 1 | 20000  |
| 15 | 263 | 1 | 55 | 1 | 1 | 2 | 3 | 1 | 200000 |
| 16 | 264 | 1 | 48 | 1 | 1 | 4 | 3 | 1 | 20000  |
| 17 | 265 | 1 | 40 | 1 | 1 | 3 | 2 | 1 | 50000  |
| 18 | 266 | 1 | 42 | 1 | 1 | 4 | 1 | 1 | 40000  |
| 19 | 267 | 1 | 60 | 1 | 1 | 4 | 4 | 1 | 20000  |
| 20 | 268 | 1 | 40 | 1 | 1 | 1 | 2 | 1 | 5000   |
| 21 | 269 | 1 | 40 | 1 | 1 | 3 | 4 | 1 | 20000  |
| 22 | 270 | 1 | 38 | 1 | 1 | 4 | 1 | 1 | 30000  |
| 23 | 271 | 1 | 72 | 2 | 2 | 1 | 3 | 1 | 20000  |
| 24 | 272 | 1 | 30 | 2 | 1 | 3 | 3 | 1 | 10000  |
| 25 | 273 | 1 | 48 | 2 | 1 | 2 | 3 | 1 | 30000  |
| 26 | 274 | 1 | 56 | 2 | 2 | 2 | 3 | 1 | 10000  |
| 27 | 275 | 1 | 40 | 2 | 1 | 2 | 3 | 1 | 35000  |
| 28 | 276 | 1 | 30 | 2 | 1 | 1 | 3 | 1 | 30000  |
| 29 | 277 | 1 | 63 | 2 | 1 | 1 | 3 | 1 | 20000  |
| 30 | 278 | 1 | 48 | 2 | 1 | 1 | 3 | 1 | 30000  |
| 31 | 279 | 1 | 52 | 2 | 1 | 1 | 3 | 1 | 20000  |
| 32 | 280 | 1 | 55 | 2 | 2 | 2 | 3 | 1 | 5000   |
| 33 | 281 | 1 | 45 | 2 | 1 | 2 | 3 | 1 | 10000  |
| 34 | 282 | 1 | 40 | 2 | 1 | 1 | 3 | 1 | 20000  |
| 35 | 283 | 1 | 50 | 2 | 2 | 1 | 3 | 1 | 50000  |
| 36 | 284 | 1 | 38 | 2 | 1 | 3 | 3 | 1 | 30000  |
| 37 | 285 | 1 | 30 | 2 | 1 | 2 | 3 | 1 | 10000  |
| 38 | 286 | 1 | 58 | 2 | 2 | 2 | 3 | 1 | 15000  |
| 39 | 287 | 1 | 48 | 1 | 1 | 2 | 3 | 1 | 30000  |
| 40 | 288 | 1 | 40 | 1 | 1 | 3 | 4 | 1 | 35000  |
| 41 | 289 | 1 | 30 | 1 | 1 | 3 | 3 | 1 | 30000  |
| 42 | 290 | 1 | 62 | 1 | 2 | 1 | 4 | 1 | 15000  |
| 43 | 291 | 1 | 63 | 1 | 1 | 2 | 3 | 1 | 20000  |
| 44 | 292 | 1 | 48 | 1 | 1 | 4 | 1 | 1 | 30000  |
| 45 | 293 | 1 | 52 | 1 | 1 | 3 | 3 | 1 | 20000  |
| 46 | 294 | 1 | 45 | 1 | 1 | 2 | 3 | 1 | 10000  |
| 47 | 295 | 1 | 45 | 1 | 2 | 3 | 3 | 1 | 2000   |
| 48 | 296 | 1 | 38 | 1 | 1 | 3 | 1 | 1 | 15000  |
| 49 | 297 | 1 | 30 | 1 | 1 | 3 | 3 | 1 | 10000  |
| 50 | 298 | 1 | 43 | 1 | 1 | 2 | 3 | 1 | 3000   |
| 51 | 299 | 1 | 54 | 2 | 1 | 3 | 3 | 1 | 15000  |

|    |     |   |    |   |   |   |   |   |        |
|----|-----|---|----|---|---|---|---|---|--------|
| 1  |     |   |    |   |   |   |   |   |        |
| 2  | 300 | 1 | 48 | 1 | 2 | 1 | 4 | 1 | 15000  |
| 3  | 301 | 1 | 45 | 1 | 2 | 3 | 1 | 1 | 20000  |
| 4  | 302 | 1 | 60 | 1 | 2 | 3 | 1 | 1 | 10000  |
| 5  | 303 | 1 | 45 | 1 | 2 | 4 | 1 | 1 | 5000   |
| 6  | 304 | 1 | 55 | 1 | 1 | 1 | 4 | 1 | 10000  |
| 7  | 305 | 1 | 43 | 2 | 1 | 1 | 3 | 1 | 20000  |
| 8  | 306 | 1 | 60 | 2 | 1 | 2 | 3 | 1 | 20000  |
| 9  | 307 | 1 | 55 | 2 | 1 | 1 | 3 | 1 | 10000  |
| 10 | 308 | 1 | 55 | 1 | 1 | 4 | 4 | 1 | 10000  |
| 11 | 309 | 1 | 60 | 2 | 1 | 2 | 3 | 1 | 100000 |
| 12 | 310 | 1 | 55 | 1 | 2 | 2 | 4 | 1 | 20000  |
| 13 | 311 | 1 | 40 | 2 | 1 | 2 | 3 | 1 | 20000  |
| 14 | 312 | 1 | 58 | 2 | 1 | 2 | 3 | 1 | 10000  |
| 15 | 313 | 1 | 60 | 2 | 1 | 2 | 3 | 1 | 20000  |
| 16 | 314 | 1 | 54 | 2 | 1 | 2 | 3 | 1 | 15000  |
| 17 | 315 | 1 | 37 | 2 | 2 | 3 | 3 | 1 | 5000   |
| 18 | 316 | 1 | 65 | 2 | 2 | 2 | 3 | 1 | 10000  |
| 19 | 317 | 1 | 85 | 2 | 2 | 1 | 3 | 1 | 2000   |
| 20 | 318 | 1 | 55 | 2 | 1 | 2 | 3 | 1 | 10000  |
| 21 | 319 | 1 | 60 | 2 | 1 | 3 | 3 | 1 | 100000 |
| 22 | 320 | 1 | 55 | 2 | 1 | 3 | 3 | 1 | 10000  |
| 23 | 321 | 1 | 60 | 2 | 1 | 3 | 3 | 1 | 20000  |
| 24 | 322 | 1 | 65 | 2 | 1 | 1 | 3 | 1 | 30000  |
| 25 | 323 | 1 | 38 | 2 | 1 | 2 | 3 | 1 | 50000  |
| 26 | 324 | 1 | 50 | 2 | 1 | 1 | 3 | 1 | 20000  |
| 27 | 325 | 1 | 43 | 2 | 2 | 2 | 3 | 1 | 3000   |
| 28 | 326 | 1 | 50 | 2 | 1 | 2 | 3 | 1 | 10000  |
| 29 | 327 | 1 | 55 | 1 | 1 | 3 | 2 | 1 | 40000  |
| 30 | 328 | 1 | 60 | 1 | 1 | 3 | 1 | 1 | 6000   |
| 31 | 329 | 1 | 26 | 1 | 1 | 3 | 2 | 1 | 10000  |
| 32 | 330 | 1 | 53 | 1 | 1 | 3 | 1 | 1 | 20000  |
| 33 | 331 | 1 | 60 | 1 | 1 | 2 | 1 | 1 | 40000  |
| 34 | 332 | 1 | 55 | 1 | 2 | 3 | 1 | 1 | 5000   |
| 35 | 333 | 1 | 51 | 1 | 1 | 3 | 1 | 1 | 10000  |
| 36 | 334 | 1 | 50 | 1 | 1 | 3 | 1 | 1 | 30000  |
| 37 | 335 | 1 | 28 | 2 | 1 | 2 | 1 | 1 | 35000  |
| 38 | 336 | 1 | 65 | 2 | 1 | 2 | 3 | 1 | 50000  |
| 39 | 337 | 1 | 66 | 2 | 1 | 3 | 3 | 1 | 40000  |
| 40 | 338 | 1 | 69 | 2 | 1 | 3 | 3 | 1 | 10000  |
| 41 | 339 | 1 | 52 | 2 | 1 | 2 | 3 | 1 | 12000  |
| 42 | 340 | 1 | 45 | 2 | 2 | 1 | 3 | 1 | 10000  |
| 43 | 341 | 1 | 70 | 2 | 1 | 3 | 3 | 1 | 30000  |
| 44 | 342 | 1 | 60 | 2 | 1 | 4 | 1 | 1 | 10000  |
| 45 | 343 | 1 | 44 | 2 | 1 | 1 | 3 | 1 | 25000  |
| 46 | 344 | 1 | 61 | 2 | 2 | 3 | 3 | 1 | 10000  |
| 47 | 345 | 1 | 24 | 2 | 1 | 3 | 2 | 1 | 12000  |
| 48 | 346 | 1 | 80 | 1 | 1 | 3 | 4 | 2 | 50000  |
| 49 | 347 | 1 | 75 | 1 | 1 | 3 | 2 | 1 | 50000  |
| 50 | 348 | 1 | 50 | 1 | 1 | 2 | 1 | 1 | 20000  |
| 51 | 349 | 1 | 56 | 1 | 1 | 1 | 3 | 1 | 300000 |

|    |     |   |    |   |   |   |   |   |        |
|----|-----|---|----|---|---|---|---|---|--------|
| 1  |     |   |    |   |   |   |   |   |        |
| 2  | 350 | 1 | 55 | 1 | 1 | 2 | 1 | 1 | 30000  |
| 3  | 351 | 1 | 50 | 1 | 2 | 4 | 1 | 1 | 15000  |
| 4  | 352 | 1 | 17 | 1 | 2 | 4 | 1 | 1 | 5000   |
| 5  | 353 | 1 | 40 | 1 | 1 | 4 | 1 | 1 | 20000  |
| 6  | 354 | 1 | 47 | 1 | 1 | 3 | 2 | 2 | 40000  |
| 7  | 355 | 1 | 30 | 1 | 1 | 3 | 1 | 1 | 20000  |
| 8  | 356 | 1 | 31 | 2 | 1 | 2 | 3 | 1 | 5000   |
| 9  | 357 | 1 | 50 | 2 | 1 | 4 | 1 | 1 | 40000  |
| 10 | 358 | 1 | 50 | 2 | 1 | 3 | 3 | 1 | 5000   |
| 11 | 359 | 1 | 40 | 2 | 1 | 2 | 3 | 1 | 10000  |
| 12 | 360 | 1 | 60 | 2 | 1 | 3 | 3 | 2 | 10000  |
| 13 | 361 | 1 | 50 | 2 | 1 | 1 | 3 | 1 | 15000  |
| 14 | 362 | 1 | 35 | 2 | 1 | 3 | 3 | 1 | 30000  |
| 15 | 363 | 1 | 44 | 2 | 1 | 2 | 3 | 1 | 10000  |
| 16 | 364 | 1 | 45 | 2 | 2 | 1 | 3 | 1 | 4000   |
| 17 | 365 | 1 | 35 | 2 | 1 | 2 | 3 | 1 | 7000   |
| 18 | 366 | 1 | 35 | 2 | 1 | 2 | 3 | 1 | 5000   |
| 19 | 367 | 1 | 53 | 2 | 1 | 1 | 3 | 1 | 10000  |
| 20 | 368 | 1 | 57 | 2 | 1 | 4 | 3 | 1 | 40000  |
| 21 | 369 | 1 | 56 | 2 | 1 | 2 | 3 | 1 | 25000  |
| 22 | 370 | 1 | 55 | 2 | 1 | 4 | 3 | 1 | 50000  |
| 23 | 371 | 1 | 60 | 2 | 1 | 4 | 1 | 1 | 20000  |
| 24 | 372 | 1 | 50 | 2 | 1 | 1 | 1 | 1 | 15000  |
| 25 | 373 | 1 | 62 | 2 | 1 | 2 | 3 | 1 | 150000 |
| 26 | 374 | 1 | 62 | 2 | 1 | 3 | 3 | 1 | 20000  |
| 27 | 375 | 1 | 45 | 2 | 1 | 3 | 3 | 1 | 10000  |
| 28 | 376 | 1 | 50 | 2 | 1 | 3 | 3 | 1 | 40000  |
| 29 | 377 | 1 | 50 | 2 | 1 | 2 | 3 | 1 | 10000  |
| 30 | 378 | 1 | 52 | 2 | 1 | 3 | 3 | 1 | 40000  |
| 31 | 379 | 1 | 33 | 2 | 1 | 3 | 3 | 2 | 25000  |
| 32 | 380 | 1 | 51 | 2 | 2 | 2 | 3 | 1 | 5000   |
| 33 | 381 | 1 | 25 | 2 | 1 | 1 | 3 | 1 | 20000  |
| 34 | 382 | 1 | 45 | 2 | 1 | 1 | 3 | 1 | 20000  |
| 35 | 383 | 1 | 32 | 2 | 1 | 2 | 3 | 1 | 16000  |
| 36 | 384 | 1 | 63 | 2 | 1 | 2 | 3 | 1 | 16000  |
| 37 | 385 | 1 | 45 | 2 | 1 | 4 | 3 | 1 | 50000  |
| 38 | 386 | 1 | 41 | 2 | 1 | 2 | 3 | 1 | 22000  |
| 39 | 387 | 1 | 40 | 2 | 1 | 3 | 3 | 1 | 50000  |
| 40 | 388 | 1 | 62 | 2 | 1 | 2 | 3 | 1 | 18000  |
| 41 | 389 | 1 | 62 | 2 | 1 | 2 | 3 | 1 | 200000 |
| 42 | 390 | 1 | 65 | 1 | 1 | 4 | 4 | 1 | 50000  |
| 43 | 391 | 1 | 60 | 1 | 1 | 4 | 1 | 1 | 5000   |
| 44 | 392 | 1 | 50 | 1 | 1 | 4 | 1 | 1 | 2000   |
| 45 | 393 | 1 | 35 | 1 | 1 | 4 | 1 | 1 | 50000  |
| 46 | 394 | 1 | 65 | 1 | 1 | 4 | 1 | 1 | 25000  |
| 47 | 395 | 1 | 60 | 1 | 1 | 3 | 2 | 1 | 50000  |
| 48 | 396 | 1 | 52 | 1 | 1 | 4 | 1 | 1 | 75000  |
| 49 | 397 | 1 | 64 | 1 | 1 | 4 | 1 | 1 | 10000  |
| 50 | 398 | 1 | 42 | 1 | 1 | 4 | 1 | 1 | 50000  |
| 51 | 399 | 1 | 48 | 1 | 1 | 4 | 1 | 1 | 80000  |

|    |     |   |    |   |   |   |   |   |        |
|----|-----|---|----|---|---|---|---|---|--------|
| 1  |     |   |    |   |   |   |   |   |        |
| 2  | 400 | 1 | 40 | 1 | 1 | 3 | 1 | 1 | 30000  |
| 3  | 401 | 1 | 53 | 1 | 1 | 3 | 1 | 1 | 12000  |
| 4  | 402 | 1 | 45 | 1 | 1 | 2 | 4 | 1 | 50000  |
| 5  | 403 | 1 | 65 | 1 | 1 | 4 | 4 | 1 | 5000   |
| 6  | 404 | 1 | 60 | 1 | 1 | 3 | 2 | 1 | 100000 |
| 7  | 405 | 1 | 60 | 1 | 1 | 4 | 1 | 1 | 50000  |
| 8  | 406 | 1 | 47 | 1 | 1 | 3 | 2 | 1 | 15000  |
| 9  | 407 | 1 | 38 | 1 | 1 | 3 | 2 | 1 | 50000  |
| 10 | 408 | 1 | 60 | 1 | 1 | 4 | 2 | 1 | 20000  |
| 11 | 409 | 1 | 80 | 1 | 1 | 3 | 2 | 1 | 80000  |
| 12 | 410 | 1 | 38 | 2 | 1 | 2 | 3 | 1 | 400000 |
| 13 | 411 | 1 | 68 | 2 | 1 | 3 | 3 | 1 | 40000  |
| 14 | 412 | 1 | 41 | 2 | 1 | 3 | 3 | 1 | 20000  |
| 15 | 413 | 1 | 47 | 2 | 1 | 3 | 3 | 1 | 50000  |
| 16 | 414 | 1 | 40 | 2 | 1 | 3 | 3 | 1 | 28000  |
| 17 | 415 | 1 | 68 | 2 | 1 | 4 | 4 | 1 | 40000  |
| 18 | 416 | 1 | 49 | 2 | 1 | 3 | 3 | 1 | 5000   |
| 19 | 417 | 1 | 36 | 2 | 1 | 1 | 3 | 1 | 10000  |
| 20 | 418 | 1 | 57 | 2 | 1 | 2 | 3 | 1 | 90000  |
| 21 | 419 | 1 | 60 | 2 | 1 | 3 | 1 | 1 | 50000  |
| 22 | 420 | 1 | 60 | 2 | 1 | 2 | 3 | 1 | 35000  |
| 23 | 421 | 1 | 45 | 2 | 1 | 2 | 3 | 1 | 31000  |
| 24 | 422 | 1 | 67 | 1 | 1 | 3 | 4 | 1 | 20000  |
| 25 | 423 | 1 | 65 | 1 | 1 | 4 | 1 | 1 | 25000  |
| 26 | 424 | 1 | 80 | 1 | 1 | 4 | 1 | 1 | 80000  |
| 27 | 425 | 1 | 30 | 1 | 1 | 3 | 2 | 1 | 15000  |
| 28 | 426 | 1 | 65 | 1 | 1 | 3 | 4 | 1 | 30000  |
| 29 | 427 | 1 | 40 | 1 | 1 | 3 | 2 | 1 | 40000  |
| 30 | 428 | 1 | 50 | 1 | 1 | 4 | 1 | 1 | 35000  |
| 31 | 429 | 1 | 28 | 1 | 1 | 4 | 4 | 1 | 20000  |
| 32 | 430 | 1 | 53 | 1 | 1 | 3 | 1 | 1 | 50000  |
| 33 | 431 | 1 | 67 | 1 | 1 | 3 | 4 | 1 | 50000  |
| 34 | 432 | 1 | 60 | 1 | 1 | 3 | 4 | 1 | 50000  |
| 35 | 433 | 1 | 65 | 1 | 1 | 4 | 1 | 1 | 22000  |
| 36 | 434 | 1 | 46 | 1 | 1 | 3 | 4 | 1 | 20000  |
| 37 | 435 | 1 | 72 | 1 | 1 | 3 | 2 | 1 | 50000  |
| 38 | 436 | 1 | 68 | 1 | 1 | 4 | 4 | 1 | 10000  |
| 39 | 437 | 1 | 39 | 1 | 1 | 4 | 2 | 1 | 30000  |
| 40 | 438 | 1 | 31 | 1 | 1 | 3 | 2 | 1 | 20000  |
| 41 | 439 | 1 | 74 | 1 | 1 | 3 | 1 | 1 | 10000  |
| 42 | 440 | 1 | 61 | 1 | 1 | 4 | 4 | 1 | 65000  |
| 43 | 441 | 1 | 51 | 1 | 1 | 2 | 1 | 1 | 20000  |
| 44 | 442 | 1 | 59 | 1 | 1 | 3 | 2 | 1 | 5000   |
| 45 | 443 | 1 | 80 | 1 | 1 | 4 | 1 | 1 | 15000  |
| 46 | 444 | 1 | 89 | 1 | 1 | 3 | 2 | 1 | 20000  |
| 47 | 445 | 1 | 50 | 1 | 2 | 3 | 4 | 1 | 5000   |
| 48 | 446 | 1 | 62 | 1 | 1 | 3 | 2 | 1 | 50000  |
| 49 | 447 | 1 | 55 | 1 | 1 | 3 | 2 | 1 | 40000  |
| 50 | 448 | 1 | 70 | 1 | 1 | 3 | 1 | 1 | 15000  |
| 51 | 449 | 1 | 65 | 1 | 1 | 2 | 3 | 1 | 12000  |

|    |     |   |    |   |   |   |   |   |        |
|----|-----|---|----|---|---|---|---|---|--------|
| 1  |     |   |    |   |   |   |   |   |        |
| 2  | 450 | 1 | 48 | 1 | 1 | 2 | 3 | 1 | 50000  |
| 3  | 451 | 1 | 44 | 2 | 1 | 2 | 3 | 1 | 50000  |
| 4  | 452 | 1 | 48 | 2 | 1 | 2 | 3 | 1 | 20000  |
| 5  | 453 | 1 | 56 | 2 | 1 | 2 | 3 | 1 | 4000   |
| 6  | 454 | 1 | 48 | 2 | 1 | 1 | 3 | 1 | 10000  |
| 7  | 455 | 1 | 40 | 2 | 1 | 2 | 3 | 1 | 50000  |
| 8  | 456 | 1 | 55 | 2 | 1 | 2 | 3 | 1 | 25000  |
| 9  | 457 | 1 | 40 | 2 | 1 | 2 | 3 | 1 | 15000  |
| 10 | 458 | 1 | 47 | 2 | 1 | 3 | 3 | 1 | 30000  |
| 11 | 459 | 1 | 41 | 2 | 1 | 1 | 3 | 1 | 20000  |
| 12 | 460 | 1 | 52 | 2 | 1 | 2 | 3 | 1 | 7000   |
| 13 | 461 | 1 | 46 | 2 | 1 | 2 | 3 | 1 | 15000  |
| 14 | 462 | 1 | 56 | 2 | 1 | 3 | 3 | 1 | 100000 |
| 15 | 463 | 1 | 39 | 2 | 1 | 2 | 3 | 1 | 20000  |
| 16 | 464 | 1 | 60 | 2 | 1 | 2 | 3 | 1 | 140000 |
| 17 | 465 | 1 | 60 | 2 | 1 | 3 | 3 | 1 | 40000  |
| 18 | 466 | 1 | 41 | 2 | 1 | 3 | 3 | 1 | 17000  |
| 19 | 467 | 1 | 58 | 2 | 1 | 2 | 3 | 1 | 27000  |
| 20 | 468 | 1 | 46 | 2 | 1 | 3 | 3 | 1 | 20000  |
| 21 | 469 | 1 | 59 | 2 | 1 | 4 | 4 | 1 | 100000 |
| 22 | 470 | 1 | 39 | 2 | 1 | 3 | 3 | 1 | 25000  |
| 23 | 471 | 1 | 50 | 2 | 1 | 4 | 4 | 1 | 22000  |
| 24 | 472 | 1 | 59 | 2 | 1 | 2 | 3 | 1 | 50000  |
| 25 | 473 | 1 | 50 | 2 | 1 | 2 | 3 | 1 | 15000  |
| 26 | 474 | 1 | 55 | 2 | 1 | 3 | 3 | 1 | 30000  |
| 27 | 475 | 1 | 67 | 2 | 1 | 3 | 3 | 1 | 100000 |
| 28 | 476 | 1 | 56 | 2 | 1 | 3 | 3 | 1 | 35000  |
| 29 | 477 | 1 | 70 | 2 | 1 | 2 | 2 | 1 | 20000  |
| 30 | 478 | 1 | 70 | 2 | 1 | 1 | 3 | 1 | 25000  |
| 31 | 479 | 1 | 59 | 2 | 1 | 2 | 3 | 1 | 10000  |
| 32 | 480 | 1 | 41 | 2 | 1 | 4 | 4 | 1 | 12000  |
| 33 | 481 | 1 | 50 | 2 | 1 | 2 | 3 | 1 | 20000  |
| 34 | 482 | 1 | 57 | 2 | 1 | 3 | 3 | 1 | 25000  |
| 35 | 483 | 1 | 66 | 2 | 1 | 1 | 3 | 1 | 40000  |
| 36 | 484 | 1 | 43 | 2 | 1 | 2 | 3 | 1 | 100000 |
| 37 | 485 | 1 | 42 | 2 | 1 | 3 | 3 | 1 | 12000  |
| 38 | 486 | 1 | 50 | 2 | 1 | 3 | 3 | 1 | 5000   |
| 39 | 487 | 1 | 66 | 2 | 1 | 2 | 3 | 1 | 200000 |
| 40 | 488 | 1 | 65 | 2 | 1 | 3 | 3 | 1 | 20000  |
| 41 | 489 | 1 | 39 | 2 | 1 | 3 | 3 | 1 | 30000  |
| 42 | 490 | 1 | 60 | 2 | 1 | 3 | 3 | 1 | 20000  |
| 43 | 491 | 1 | 46 | 2 | 1 | 2 | 4 | 1 | 10000  |
| 44 | 492 | 1 | 65 | 2 | 2 | 3 | 3 | 1 | 7000   |
| 45 | 493 | 1 | 45 | 1 | 1 | 3 | 4 | 1 | 18000  |
| 46 | 494 | 1 | 50 | 2 | 1 | 2 | 3 | 1 | 20000  |
| 47 | 495 | 1 | 62 | 2 | 1 | 2 | 3 | 1 | 30000  |
| 48 | 496 | 1 | 55 | 1 | 1 | 4 | 1 | 1 | 20000  |
| 49 | 497 | 1 | 62 | 2 | 1 | 2 | 3 | 1 | 50000  |
| 50 | 498 | 1 | 50 | 1 | 1 | 4 | 1 | 1 | 10000  |
| 51 | 499 | 1 | 65 | 2 | 1 | 2 | 3 | 1 | 35000  |



|    |     |   |    |   |   |   |   |   |        |
|----|-----|---|----|---|---|---|---|---|--------|
| 1  |     |   |    |   |   |   |   |   |        |
| 2  | 500 | 1 | 45 | 2 | 1 | 3 | 3 | 1 | 50000  |
| 3  | 501 | 1 | 58 | 1 | 1 | 3 | 1 | 1 | 15000  |
| 4  | 502 | 1 | 49 | 1 | 1 | 3 | 3 | 1 | 150000 |
| 5  | 503 | 1 | 46 | 2 | 1 | 2 | 3 | 1 | 10000  |
| 6  | 504 | 1 | 37 | 2 | 1 | 2 | 3 | 1 | 50000  |
| 7  | 505 | 1 | 50 | 1 | 1 | 1 | 3 | 1 | 50000  |
| 8  | 506 | 1 | 51 | 2 | 1 | 1 | 2 | 1 | 10000  |
| 9  | 507 | 1 | 43 | 2 | 1 | 4 | 3 | 1 | 30000  |
| 10 | 508 | 1 | 40 | 2 | 1 | 1 | 3 | 1 | 30000  |
| 11 | 509 | 1 | 55 | 2 | 1 | 3 | 3 | 1 | 50000  |
| 12 | 510 | 1 | 48 | 2 | 1 | 4 | 3 | 1 | 20000  |
| 13 | 511 | 1 | 65 | 2 | 1 | 2 | 3 | 1 | 50000  |
| 14 | 512 | 1 | 56 | 2 | 1 | 1 | 3 | 1 | 30000  |
| 15 | 513 | 1 | 50 | 2 | 1 | 3 | 3 | 1 | 30000  |
| 16 | 514 | 1 | 35 | 2 | 1 | 3 | 1 | 1 | 25000  |
| 17 | 515 | 1 | 60 | 2 | 1 | 3 | 3 | 1 | 50000  |
| 18 | 516 | 1 | 53 | 2 | 1 | 3 | 3 | 1 | 10000  |
| 19 | 517 | 1 | 62 | 2 | 1 | 1 | 3 | 1 | 100000 |
| 20 | 518 | 1 | 52 | 2 | 1 | 3 | 3 | 1 | 20000  |
| 21 | 519 | 1 | 63 | 2 | 1 | 2 | 3 | 1 | 20000  |
| 22 | 520 | 1 | 42 | 2 | 1 | 1 | 3 | 1 | 60000  |
| 23 | 521 | 1 | 45 | 2 | 2 | 2 | 3 | 1 | 10000  |
| 24 | 522 | 1 | 50 | 2 | 1 | 1 | 3 | 1 | 10000  |
| 25 | 523 | 1 | 80 | 2 | 1 | 3 | 4 | 1 | 10000  |
| 26 | 524 | 1 | 44 | 2 | 1 | 2 | 3 | 1 | 20000  |
| 27 | 525 | 1 | 72 | 2 | 1 | 2 | 3 | 1 | 40000  |
| 28 | 526 | 1 | 45 | 2 | 1 | 2 | 3 | 1 | 30000  |
| 29 | 527 | 1 | 60 | 2 | 1 | 3 | 3 | 1 | 30000  |
| 30 | 528 | 1 | 50 | 2 | 1 | 1 | 3 | 1 | 10000  |
| 31 | 529 | 1 | 31 | 2 | 1 | 3 | 3 | 1 | 30000  |
| 32 | 530 | 1 | 55 | 2 | 1 | 2 | 3 | 1 | 100000 |
| 33 | 531 | 1 | 50 | 2 | 1 | 2 | 3 | 1 | 50000  |
| 34 | 532 | 1 | 40 | 2 | 1 | 2 | 3 | 1 | 12000  |
| 35 | 533 | 1 | 48 | 2 | 1 | 2 | 3 | 1 | 20000  |
| 36 | 534 | 1 | 42 | 2 | 1 | 1 | 3 | 1 | 100000 |
| 37 | 535 | 1 | 41 | 2 | 1 | 3 | 3 | 1 | 100000 |
| 38 | 536 | 1 | 62 | 2 | 1 | 2 | 3 | 1 | 10000  |
| 39 | 537 | 1 | 50 | 2 | 1 | 2 | 3 | 1 | 15000  |
| 40 | 538 | 1 | 58 | 2 | 1 | 2 | 3 | 1 | 30000  |
| 41 | 539 | 1 | 65 | 2 | 2 | 1 | 3 | 1 | 20000  |
| 42 | 540 | 1 | 56 | 2 | 1 | 2 | 3 | 1 | 50000  |
| 43 | 541 | 1 | 37 | 1 | 1 | 3 | 3 | 1 | 15000  |
| 44 | 542 | 1 | 30 | 2 | 1 | 1 | 3 | 1 | 18000  |
| 45 | 543 | 1 | 55 | 2 | 1 | 2 | 3 | 1 | 30000  |
| 46 | 544 | 1 | 55 | 2 | 1 | 2 | 3 | 1 | 175000 |
| 47 | 545 | 1 | 49 | 1 | 1 | 2 | 3 | 1 | 20000  |
| 48 | 546 | 1 | 33 | 1 | 1 | 3 | 1 | 1 | 50000  |
| 49 | 547 | 1 | 70 | 1 | 1 | 2 | 3 | 1 | 60000  |
| 50 | 548 | 1 | 55 | 2 | 1 | 2 | 3 | 1 | 30000  |
| 51 | 549 | 1 | 55 | 1 | 1 | 1 | 1 | 1 | 60000  |

|    |     |   |    |   |   |   |   |   |        |
|----|-----|---|----|---|---|---|---|---|--------|
| 1  |     |   |    |   |   |   |   |   |        |
| 2  | 550 | 1 | 70 | 1 | 1 | 4 | 1 | 1 | 100000 |
| 3  | 551 | 1 | 60 | 2 | 1 | 2 | 1 | 1 | 35000  |
| 4  | 552 | 1 | 40 | 2 | 1 | 2 | 3 | 1 | 15000  |
| 5  | 553 | 1 | 40 | 1 | 1 | 2 | 3 | 1 | 30000  |
| 6  | 554 | 1 | 16 | 2 | 2 | 2 | 3 | 1 | 5000   |
| 7  | 555 | 1 | 50 | 2 | 1 | 2 | 3 | 1 | 15000  |
| 8  | 556 | 1 | 32 | 2 | 1 | 2 | 3 | 1 | 25000  |
| 9  | 557 | 1 | 29 | 2 | 1 | 1 | 3 | 1 | 30000  |
| 10 | 558 | 1 | 54 | 2 | 1 | 2 | 3 | 1 | 25000  |
| 11 | 559 | 1 | 60 | 1 | 1 | 2 | 2 | 1 | 20000  |
| 12 | 560 | 1 | 40 | 1 | 1 | 4 | 2 | 1 | 20000  |
| 13 | 561 | 1 | 42 | 2 | 1 | 1 | 3 | 1 | 15000  |
| 14 | 562 | 1 | 54 | 2 | 1 | 3 | 3 | 1 | 40000  |
| 15 | 563 | 1 | 42 | 2 | 1 | 2 | 3 | 1 | 27000  |
| 16 | 564 | 1 | 41 | 2 | 1 | 1 | 3 | 1 | 1000   |
| 17 | 565 | 1 | 31 | 2 | 1 | 1 | 3 | 1 | 10000  |
| 18 | 566 | 1 | 70 | 2 | 1 | 3 | 3 | 1 | 10000  |
| 19 | 567 | 1 | 40 | 2 | 1 | 2 | 3 | 1 | 13000  |
| 20 | 568 | 1 | 42 | 2 | 1 | 1 | 3 | 1 | 10000  |
| 21 | 569 | 1 | 92 | 2 | 1 | 2 | 3 | 1 | 40000  |
| 22 | 570 | 1 | 55 | 2 | 1 | 3 | 3 | 1 | 25000  |
| 23 | 571 | 1 | 58 | 2 | 1 | 2 | 3 | 1 | 20000  |
| 24 | 572 | 1 | 56 | 1 | 1 | 2 | 3 | 1 | 30000  |
| 25 | 573 | 1 | 30 | 2 | 1 | 2 | 3 | 1 | 6000   |
| 26 | 574 | 1 | 40 | 2 | 2 | 2 | 3 | 1 | 8000   |
| 27 | 575 | 1 | 35 | 2 | 1 | 1 | 3 | 1 | 40000  |
| 28 | 576 | 1 | 75 | 2 | 1 | 2 | 3 | 1 | 60000  |
| 29 | 577 | 1 | 55 | 2 | 1 | 4 | 3 | 1 | 50000  |
| 30 | 578 | 1 | 50 | 2 | 1 | 1 | 3 | 2 | 60000  |
| 31 | 579 | 1 | 62 | 1 | 1 | 3 | 2 | 1 | 25000  |
| 32 | 580 | 1 | 55 | 2 | 1 | 2 | 3 | 1 | 50000  |
| 33 | 581 | 1 | 52 | 1 | 1 | 4 | 1 | 1 | 50000  |
| 34 | 582 | 1 | 55 | 2 | 1 | 2 | 3 | 1 | 5000   |
| 35 | 583 | 1 | 50 | 2 | 1 | 3 | 1 | 1 | 7000   |
| 36 | 584 | 1 | 81 | 1 | 1 | 3 | 2 | 1 | 8000   |
| 37 | 585 | 1 | 62 | 1 | 1 | 3 | 1 | 1 | 10000  |
| 38 | 586 | 1 | 50 | 1 | 1 | 1 | 3 | 1 | 25000  |
| 39 | 587 | 1 | 45 | 2 | 1 | 1 | 3 | 1 | 50000  |
| 40 | 588 | 1 | 44 | 2 | 1 | 2 | 3 | 1 | 50000  |
| 41 | 589 | 1 | 42 | 1 | 1 | 2 | 1 | 1 | 15000  |
| 42 | 590 | 1 | 55 | 1 | 1 | 2 | 2 | 1 | 15000  |
| 43 | 591 | 1 | 60 | 1 | 1 | 2 | 2 | 1 | 35000  |
| 44 | 592 | 1 | 47 | 1 | 2 | 1 | 3 | 1 | 3500   |
| 45 | 593 | 1 | 45 | 2 | 1 | 2 | 3 | 1 | 1000   |
| 46 | 594 | 1 | 61 | 1 | 1 | 2 | 4 | 1 | 35000  |
| 47 | 595 | 1 | 57 | 2 | 1 | 2 | 3 | 1 | 8000   |
| 48 | 596 | 1 | 30 | 1 | 1 | 2 | 2 | 1 | 20000  |
| 49 | 597 | 1 | 42 | 2 | 1 | 2 | 3 | 1 | 15000  |
| 50 | 598 | 1 | 75 | 2 | 1 | 3 | 3 | 1 | 15000  |
| 51 | 599 | 1 | 40 | 2 | 2 | 1 | 3 | 1 | 1000   |

|    |     |   |    |   |   |   |   |   |        |
|----|-----|---|----|---|---|---|---|---|--------|
| 1  |     |   |    |   |   |   |   |   |        |
| 2  | 600 | 1 | 47 | 1 | 2 | 2 | 2 | 1 | 16000  |
| 3  | 601 | 1 | 47 | 2 | 1 | 2 | 3 | 1 | 12000  |
| 4  | 602 | 1 | 50 | 2 | 1 | 2 | 3 | 1 | 20000  |
| 5  | 603 | 1 | 50 | 1 | 1 | 2 | 1 | 1 | 20000  |
| 6  | 604 | 1 | 63 | 2 | 2 | 2 | 3 | 1 | 10000  |
| 8  | 605 | 1 | 55 | 2 | 1 | 2 | 3 | 1 | 8000   |
| 9  | 606 | 1 | 52 | 2 | 1 | 2 | 3 | 1 | 10000  |
| 10 | 607 | 1 | 40 | 2 | 1 | 3 | 3 | 1 | 50000  |
| 11 | 608 | 1 | 47 | 2 | 1 | 3 | 3 | 1 | 12000  |
| 12 | 609 | 1 | 50 | 2 | 1 | 2 | 3 | 1 | 10000  |
| 14 | 610 | 1 | 55 | 1 | 1 | 2 | 1 | 1 | 5000   |
| 15 | 611 | 1 | 60 | 2 | 1 | 1 | 3 | 1 | 10000  |
| 16 | 612 | 1 | 52 | 2 | 1 | 3 | 2 | 1 | 20000  |
| 17 | 613 | 1 | 51 | 2 | 1 | 2 | 3 | 1 | 15000  |
| 18 | 614 | 1 | 40 | 1 | 1 | 4 | 1 | 1 | 10000  |
| 20 | 615 | 1 | 52 | 1 | 1 | 2 | 2 | 1 | 9000   |
| 21 | 616 | 1 | 40 | 1 | 1 | 2 | 3 | 1 | 15000  |
| 22 | 617 | 1 | 70 | 2 | 1 | 3 | 3 | 1 | 5000   |
| 23 | 618 | 1 | 82 | 2 | 1 | 2 | 3 | 1 | 8000   |
| 24 | 619 | 1 | 40 | 1 | 1 | 1 | 1 | 1 | 10000  |
| 26 | 620 | 1 | 40 | 2 | 1 | 1 | 1 | 1 | 20000  |
| 27 | 621 | 1 | 50 | 2 | 1 | 3 | 1 | 1 | 15000  |
| 28 | 622 | 1 | 50 | 1 | 1 | 1 | 2 | 1 | 20000  |
| 29 | 623 | 1 | 55 | 2 | 1 | 3 | 3 | 1 | 10000  |
| 30 | 624 | 1 | 50 | 1 | 1 | 2 | 2 | 1 | 15000  |
| 32 | 625 | 1 | 81 | 2 | 2 | 2 | 3 | 1 | 10000  |
| 33 | 626 | 1 | 57 | 2 | 1 | 2 | 3 | 1 | 20000  |
| 34 | 627 | 1 | 55 | 2 | 1 | 2 | 3 | 1 | 8000   |
| 35 | 628 | 1 | 55 | 1 | 1 | 4 | 1 | 1 | 3000   |
| 36 | 629 | 1 | 55 | 1 | 1 | 3 | 1 | 1 | 50000  |
| 38 | 630 | 1 | 60 | 2 | 1 | 1 | 3 | 1 | 20000  |
| 39 | 631 | 1 | 55 | 1 | 1 | 3 | 2 | 1 | 15000  |
| 40 | 632 | 1 | 35 | 1 | 1 | 2 | 1 | 1 | 15000  |
| 41 | 633 | 1 | 48 | 2 | 1 | 3 | 3 | 1 | 20000  |
| 42 | 634 | 1 | 66 | 2 | 1 | 1 | 3 | 1 | 10000  |
| 44 | 635 | 1 | 45 | 2 | 1 | 2 | 3 | 1 | 15000  |
| 45 | 636 | 1 | 47 | 1 | 1 | 2 | 1 | 1 | 15000  |
| 46 | 637 | 1 | 48 | 1 | 1 | 2 | 1 | 1 | 15000  |
| 47 | 638 | 1 | 60 | 1 | 1 | 3 | 2 | 1 | 20000  |
| 48 | 639 | 1 | 70 | 2 | 1 | 2 | 3 | 1 | 500000 |
| 50 | 640 | 1 | 60 | 1 | 1 | 2 | 2 | 1 | 20000  |
| 51 | 641 | 2 | 50 | 2 | 2 | 2 | 3 | 1 | 35000  |
| 52 | 642 | 2 | 58 | 2 | 2 | 2 | 3 | 1 | 5000   |
| 53 | 643 | 2 | 65 | 2 | 2 | 3 | 3 | 1 | 25000  |
| 54 | 644 | 2 | 50 | 1 | 1 | 2 | 2 | 1 | 35000  |
| 56 | 645 | 2 | 50 | 2 | 2 | 1 | 3 | 1 | 10000  |
| 57 | 646 | 2 | 52 | 2 | 2 | 1 | 3 | 1 | 15000  |
| 58 | 647 | 2 | 50 | 2 | 2 | 2 | 3 | 1 | 10000  |
| 59 | 648 | 2 | 32 | 2 | 2 | 2 | 3 | 1 | 14000  |
| 60 | 649 | 2 | 55 | 2 | 2 | 2 | 3 | 1 | 10000  |

|    |     |   |    |   |   |   |   |   |       |
|----|-----|---|----|---|---|---|---|---|-------|
| 1  |     |   |    |   |   |   |   |   |       |
| 2  | 650 | 2 | 48 | 2 | 2 | 1 | 3 | 1 | 15000 |
| 3  | 651 | 2 | 50 | 2 | 2 | 3 | 3 | 1 | 10000 |
| 4  | 652 | 2 | 58 | 2 | 2 | 2 | 3 | 1 | 30000 |
| 5  | 653 | 2 | 42 | 2 | 2 | 1 | 3 | 1 | 10000 |
| 6  | 654 | 2 | 32 | 2 | 1 | 3 | 3 | 1 | 7000  |
| 8  | 655 | 2 | 42 | 2 | 1 | 2 | 3 | 1 | 10000 |
| 9  | 656 | 2 | 34 | 2 | 2 | 2 | 3 | 1 | 10000 |
| 10 | 657 | 2 | 60 | 2 | 2 | 1 | 3 | 1 | 50000 |
| 11 | 658 | 2 | 60 | 2 | 1 | 3 | 3 | 1 | 35000 |
| 12 | 659 | 2 | 55 | 2 | 2 | 1 | 3 | 1 | 6000  |
| 14 | 660 | 2 | 50 | 2 | 2 | 1 | 3 | 1 | 10000 |
| 15 | 661 | 2 | 64 | 2 | 2 | 3 | 3 | 1 | 8000  |
| 16 | 662 | 2 | 55 | 2 | 2 | 2 | 3 | 1 | 2000  |
| 17 | 663 | 2 | 39 | 2 | 2 | 2 | 3 | 1 | 3000  |
| 18 | 664 | 2 | 70 | 2 | 2 | 1 | 3 | 1 | 15000 |
| 20 | 665 | 2 | 50 | 2 | 2 | 2 | 3 | 1 | 90000 |
| 21 | 666 | 2 | 54 | 2 | 2 | 3 | 3 | 1 | 10000 |
| 22 | 667 | 2 | 53 | 1 | 2 | 4 | 1 | 1 | 10000 |
| 23 | 668 | 2 | 30 | 1 | 1 | 3 | 1 | 1 | 10000 |
| 24 | 669 | 2 | 50 | 1 | 2 | 2 | 4 | 1 | 15000 |
| 26 | 670 | 2 | 38 | 1 | 1 | 1 | 2 | 1 | 50000 |
| 27 | 671 | 2 | 61 | 1 | 1 | 2 | 1 | 1 | 20000 |
| 28 | 672 | 2 | 52 | 1 | 2 | 3 | 4 | 1 | 2000  |
| 29 | 673 | 2 | 30 | 1 | 2 | 3 | 1 | 1 | 6000  |
| 31 | 674 | 2 | 45 | 1 | 2 | 3 | 4 | 1 | 10000 |
| 32 | 675 | 2 | 38 | 1 | 2 | 3 | 2 | 1 | 2000  |
| 33 | 676 | 2 | 50 | 1 | 2 | 1 | 2 | 1 | 10000 |
| 34 | 677 | 2 | 50 | 1 | 1 | 4 | 2 | 1 | 50000 |
| 35 | 678 | 2 | 55 | 1 | 1 | 2 | 2 | 1 | 10000 |
| 36 | 679 | 2 | 45 | 1 | 1 | 2 | 2 | 1 | 15000 |
| 38 | 680 | 2 | 42 | 1 | 1 | 2 | 2 | 1 | 35000 |
| 39 | 681 | 2 | 45 | 1 | 2 | 1 | 4 | 1 | 5000  |
| 40 | 682 | 2 | 30 | 1 | 2 | 1 | 2 | 1 | 3000  |
| 41 | 683 | 2 | 45 | 1 | 2 | 3 | 4 | 1 | 20000 |
| 42 | 684 | 2 | 50 | 1 | 2 | 2 | 2 | 1 | 20000 |
| 44 | 685 | 2 | 65 | 1 | 1 | 2 | 4 | 1 | 20000 |
| 45 | 686 | 2 | 70 | 1 | 1 | 3 | 1 | 1 | 10000 |
| 46 | 687 | 2 | 50 | 1 | 2 | 1 | 4 | 1 | 10000 |
| 47 | 689 | 2 | 50 | 1 | 1 | 2 | 2 | 1 | 25000 |
| 49 | 690 | 2 | 31 | 1 | 2 | 3 | 2 | 1 | 10000 |
| 50 | 691 | 2 | 62 | 1 | 2 | 4 | 4 | 1 | 15000 |
| 51 | 692 | 2 | 35 | 1 | 2 | 3 | 2 | 1 | 10000 |
| 52 | 693 | 2 | 45 | 1 | 2 | 4 | 2 | 1 | 3000  |
| 53 | 694 | 2 | 35 | 1 | 2 | 3 | 4 | 1 | 30000 |
| 55 | 695 | 2 | 50 | 1 | 2 | 2 | 4 | 1 | 5000  |
| 56 | 696 | 2 | 50 | 1 | 2 | 1 | 4 | 1 | 5000  |
| 57 | 697 | 2 | 59 | 1 | 2 | 2 | 4 | 1 | 8000  |
| 58 | 698 | 2 | 35 | 1 | 1 | 1 | 4 | 1 | 10000 |
| 59 | 699 | 2 | 60 | 1 | 2 | 1 | 4 | 1 | 50000 |
| 60 | 700 | 2 | 40 | 1 | 1 | 4 | 4 | 1 | 6000  |

|    |     |   |    |   |   |   |   |   |        |
|----|-----|---|----|---|---|---|---|---|--------|
| 1  |     |   |    |   |   |   |   |   |        |
| 2  | 701 | 2 | 42 | 1 | 2 | 3 | 1 | 1 | 20000  |
| 3  | 702 | 2 | 48 | 1 | 1 | 3 | 4 | 1 | 12000  |
| 4  | 702 | 2 | 30 | 1 | 1 | 3 | 4 | 1 | 5000   |
| 5  | 703 | 2 | 35 | 1 | 2 | 2 | 2 | 1 | 2000   |
| 6  | 704 | 2 | 50 | 1 | 2 | 4 | 4 | 1 | 10000  |
| 8  | 705 | 2 | 35 | 1 | 2 | 4 | 4 | 1 | 8000   |
| 9  | 706 | 2 | 55 | 1 | 2 | 2 | 2 | 1 | 10000  |
| 10 | 707 | 2 | 46 | 1 | 2 | 3 | 4 | 1 | 5000   |
| 11 | 708 | 2 | 50 | 1 | 2 | 4 | 4 | 1 | 10000  |
| 12 | 709 | 2 | 35 | 1 | 2 | 2 | 2 | 1 | 20000  |
| 14 | 710 | 2 | 52 | 1 | 2 | 2 | 3 | 1 | 16000  |
| 15 | 711 | 2 | 24 | 1 | 2 | 4 | 2 | 1 | 3000   |
| 16 | 712 | 2 | 65 | 1 | 2 | 3 | 4 | 1 | 5000   |
| 17 | 713 | 2 | 40 | 1 | 2 | 3 | 2 | 1 | 10000  |
| 18 | 714 | 2 | 55 | 1 | 1 | 4 | 1 | 1 | 40000  |
| 20 | 715 | 2 | 40 | 1 | 2 | 3 | 4 | 1 | 2000   |
| 21 | 716 | 2 | 45 | 1 | 2 | 4 | 4 | 1 | 10000  |
| 22 | 717 | 2 | 51 | 1 | 2 | 4 | 4 | 1 | 5000   |
| 23 | 718 | 2 | 52 | 1 | 2 | 2 | 4 | 1 | 10000  |
| 24 | 719 | 2 | 40 | 1 | 1 | 4 | 1 | 1 | 20000  |
| 26 | 720 | 2 | 35 | 1 | 1 | 2 | 4 | 1 | 100000 |
| 27 | 721 | 2 | 55 | 1 | 2 | 3 | 4 | 1 | 15000  |
| 28 | 722 | 2 | 65 | 1 | 1 | 4 | 1 | 1 | 18000  |
| 29 | 723 | 2 | 32 | 1 | 2 | 4 | 4 | 1 | 12000  |
| 31 | 724 | 2 | 43 | 1 | 2 | 4 | 1 | 1 | 10000  |
| 32 | 725 | 2 | 30 | 1 | 1 | 1 | 4 | 1 | 15000  |
| 33 | 726 | 2 | 45 | 1 | 2 | 4 | 1 | 1 | 10000  |
| 34 | 727 | 2 | 50 | 1 | 2 | 3 | 4 | 1 | 10000  |
| 35 | 728 | 2 | 60 | 1 | 1 | 3 | 2 | 1 | 5000   |
| 36 | 729 | 2 | 60 | 1 | 1 | 2 | 1 | 1 | 30000  |
| 38 | 730 | 2 | 45 | 1 | 2 | 3 | 2 | 1 | 3000   |
| 39 | 731 | 2 | 50 | 1 | 1 | 3 | 2 | 1 | 25000  |
| 40 | 732 | 2 | 54 | 1 | 1 | 4 | 1 | 1 | 50000  |
| 41 | 733 | 2 | 59 | 1 | 1 | 4 | 2 | 1 | 30000  |
| 43 | 734 | 2 | 80 | 2 | 1 | 2 | 3 | 1 | 10000  |
| 44 | 735 | 2 | 45 | 1 | 2 | 4 | 1 | 1 | 2000   |
| 45 | 736 | 2 | 32 | 1 | 2 | 2 | 1 | 1 | 15000  |
| 46 | 737 | 2 | 62 | 1 | 2 | 2 | 4 | 1 | 100000 |
| 47 | 738 | 2 | 46 | 1 | 2 | 3 | 2 | 1 | 15000  |
| 48 | 739 | 2 | 45 | 1 | 1 | 3 | 2 | 1 | 20000  |
| 50 | 740 | 2 | 40 | 1 | 1 | 2 | 2 | 1 | 30000  |
| 51 | 741 | 2 | 40 | 1 | 2 | 3 | 1 | 1 | 80000  |
| 52 | 742 | 2 | 35 | 1 | 2 | 2 | 4 | 1 | 22000  |
| 53 | 743 | 2 | 58 | 1 | 1 | 3 | 4 | 1 | 80000  |
| 54 | 744 | 2 | 50 | 1 | 1 | 4 | 4 | 1 | 20000  |
| 56 | 745 | 2 | 32 | 1 | 2 | 4 | 1 | 1 | 30000  |
| 57 | 746 | 2 | 49 | 1 | 2 | 3 | 4 | 1 | 2000   |
| 58 | 747 | 2 | 65 | 2 | 1 | 3 | 3 | 1 | 9000   |
| 59 | 748 | 2 | 52 | 2 | 2 | 4 | 3 | 1 | 30000  |
| 60 | 749 | 2 | 47 | 2 | 1 | 4 | 3 | 1 | 50000  |

|    |     |   |    |   |   |   |   |   |        |
|----|-----|---|----|---|---|---|---|---|--------|
| 1  |     |   |    |   |   |   |   |   |        |
| 2  | 750 | 2 | 61 | 2 | 2 | 3 | 3 | 1 | 25000  |
| 3  | 751 | 2 | 48 | 2 | 1 | 4 | 1 | 2 | 120000 |
| 4  | 752 | 2 | 50 | 2 | 1 | 2 | 3 | 1 | 12000  |
| 5  | 753 | 2 | 52 | 2 | 1 | 3 | 1 | 2 | 20000  |
| 6  | 754 | 2 | 30 | 2 | 2 | 2 | 3 | 1 | 5000   |
| 8  | 755 | 2 | 44 | 2 | 1 | 2 | 3 | 1 | 50000  |
| 9  | 756 | 2 | 55 | 2 | 2 | 4 | 3 | 1 | 25000  |
| 10 | 757 | 2 | 70 | 2 | 1 | 4 | 3 | 1 | 12000  |
| 11 | 758 | 2 | 56 | 2 | 1 | 4 | 1 | 1 | 120000 |
| 12 | 759 | 2 | 60 | 2 | 1 | 1 | 3 | 1 | 20000  |
| 13 | 760 | 2 | 50 | 2 | 1 | 3 | 3 | 1 | 20000  |
| 14 | 761 | 2 | 40 | 2 | 2 | 2 | 3 | 1 | 10000  |
| 15 | 762 | 2 | 50 | 2 | 2 | 2 | 3 | 1 | 10000  |
| 16 | 762 | 2 | 50 | 2 | 2 | 2 | 3 | 1 | 10000  |
| 17 | 763 | 2 | 31 | 2 | 2 | 2 | 3 | 1 | 20000  |
| 18 | 764 | 2 | 55 | 2 | 1 | 4 | 1 | 1 | 15000  |
| 19 | 764 | 2 | 55 | 2 | 1 | 4 | 1 | 1 | 15000  |
| 20 | 765 | 2 | 53 | 2 | 2 | 2 | 3 | 1 | 10000  |
| 21 | 766 | 2 | 60 | 2 | 2 | 1 | 3 | 1 | 20000  |
| 22 | 767 | 2 | 50 | 2 | 2 | 1 | 3 | 1 | 15000  |
| 23 | 768 | 2 | 40 | 2 | 1 | 3 | 3 | 1 | 100000 |
| 24 | 769 | 2 | 32 | 2 | 2 | 1 | 3 | 1 | 15000  |
| 25 | 769 | 2 | 32 | 2 | 2 | 1 | 3 | 1 | 15000  |
| 26 | 770 | 2 | 60 | 2 | 1 | 1 | 3 | 1 | 40000  |
| 27 | 771 | 2 | 55 | 2 | 2 | 3 | 3 | 1 | 15000  |
| 28 | 772 | 2 | 53 | 2 | 1 | 2 | 2 | 1 | 10000  |
| 29 | 773 | 2 | 65 | 2 | 1 | 3 | 3 | 1 | 12000  |
| 30 | 773 | 2 | 65 | 2 | 1 | 3 | 3 | 1 | 12000  |
| 31 | 774 | 2 | 49 | 2 | 2 | 3 | 3 | 1 | 8000   |
| 32 | 775 | 2 | 57 | 2 | 1 | 2 | 3 | 1 | 20000  |
| 33 | 776 | 2 | 50 | 2 | 1 | 2 | 3 | 1 | 15000  |
| 34 | 777 | 2 | 43 | 2 | 2 | 1 | 3 | 1 | 60000  |
| 35 | 778 | 2 | 30 | 2 | 1 | 3 | 3 | 1 | 20000  |
| 36 | 778 | 2 | 30 | 2 | 1 | 3 | 3 | 1 | 20000  |
| 37 | 779 | 2 | 60 | 2 | 2 | 1 | 3 | 1 | 25000  |
| 38 | 780 | 2 | 50 | 2 | 2 | 2 | 3 | 1 | 18000  |
| 39 | 781 | 2 | 55 | 2 | 1 | 2 | 3 | 1 | 7000   |
| 40 | 782 | 2 | 35 | 2 | 2 | 2 | 3 | 1 | 9000   |
| 41 | 783 | 2 | 50 | 2 | 2 | 1 | 3 | 1 | 15000  |
| 42 | 783 | 2 | 50 | 2 | 2 | 1 | 3 | 1 | 15000  |
| 43 | 784 | 2 | 37 | 2 | 2 | 2 | 3 | 1 | 7000   |
| 44 | 785 | 2 | 40 | 2 | 2 | 3 | 1 | 1 | 15000  |
| 45 | 786 | 2 | 45 | 2 | 2 | 2 | 3 | 1 | 5000   |
| 46 | 787 | 2 | 37 | 2 | 2 | 4 | 3 | 1 | 5000   |
| 47 | 787 | 2 | 37 | 2 | 2 | 4 | 3 | 1 | 5000   |
| 48 | 788 | 2 | 60 | 2 | 2 | 1 | 3 | 1 | 10000  |
| 49 | 789 | 2 | 45 | 2 | 2 | 2 | 3 | 1 | 20000  |
| 50 | 790 | 2 | 55 | 2 | 2 | 4 | 3 | 1 | 5000   |
| 51 | 791 | 2 | 42 | 2 | 2 | 2 | 3 | 1 | 20000  |
| 52 | 792 | 2 | 60 | 2 | 2 | 1 | 3 | 1 | 6000   |
| 53 | 792 | 2 | 60 | 2 | 2 | 1 | 3 | 1 | 6000   |
| 54 | 793 | 2 | 71 | 2 | 2 | 1 | 3 | 1 | 3000   |
| 55 | 794 | 2 | 44 | 2 | 1 | 2 | 3 | 1 | 5000   |
| 56 | 795 | 2 | 45 | 2 | 1 | 1 | 3 | 1 | 45000  |
| 57 | 796 | 2 | 56 | 2 | 1 | 3 | 1 | 1 | 2000   |
| 58 | 797 | 2 | 72 | 2 | 2 | 3 | 3 | 1 | 5000   |
| 59 | 798 | 2 | 45 | 2 | 1 | 4 | 1 | 1 | 45000  |
| 60 | 798 | 2 | 45 | 2 | 1 | 4 | 1 | 1 | 45000  |
|    | 799 | 2 | 38 | 2 | 1 | 2 | 2 | 1 | 12000  |

|    |     |   |    |   |   |   |   |   |        |
|----|-----|---|----|---|---|---|---|---|--------|
| 1  |     |   |    |   |   |   |   |   |        |
| 2  | 800 | 2 | 60 | 2 | 2 | 3 | 3 | 1 | 50000  |
| 3  | 801 | 2 | 46 | 2 | 2 | 2 | 3 | 1 | 8000   |
| 4  | 802 | 2 | 50 | 2 | 2 | 2 | 3 | 1 | 50000  |
| 5  | 803 | 2 | 49 | 2 | 2 | 3 | 3 | 1 | 12000  |
| 6  | 804 | 2 | 45 | 2 | 1 | 3 | 1 | 1 | 10000  |
| 7  | 805 | 2 | 54 | 2 | 2 | 2 | 3 | 1 | 10000  |
| 8  | 806 | 2 | 55 | 2 | 2 | 2 | 3 | 1 | 7000   |
| 9  | 807 | 2 | 60 | 2 | 2 | 2 | 3 | 1 | 20000  |
| 10 | 808 | 2 | 60 | 2 | 1 | 2 | 3 | 1 | 10000  |
| 11 | 809 | 2 | 27 | 2 | 1 | 3 | 3 | 1 | 2000   |
| 12 | 810 | 2 | 61 | 2 | 2 | 2 | 3 | 1 | 25000  |
| 13 | 811 | 2 | 55 | 2 | 2 | 3 | 3 | 1 | 20000  |
| 14 | 812 | 2 | 50 | 2 | 1 | 2 | 1 | 1 | 6000   |
| 15 | 813 | 2 | 35 | 2 | 1 | 3 | 3 | 1 | 6000   |
| 16 | 814 | 2 | 60 | 2 | 2 | 3 | 3 | 1 | 3000   |
| 17 | 815 | 2 | 45 | 2 | 1 | 3 | 3 | 1 | 10000  |
| 18 | 816 | 2 | 60 | 2 | 2 | 1 | 4 | 1 | 5000   |
| 19 | 817 | 2 | 40 | 2 | 2 | 1 | 3 | 1 | 2000   |
| 20 | 818 | 2 | 50 | 2 | 1 | 4 | 1 | 1 | 10000  |
| 21 | 819 | 2 | 55 | 2 | 2 | 2 | 3 | 1 | 75000  |
| 22 | 820 | 2 | 55 | 2 | 2 | 2 | 4 | 1 | 20000  |
| 23 | 821 | 2 | 62 | 2 | 2 | 2 | 3 | 1 | 10000  |
| 24 | 822 | 2 | 55 | 2 | 1 | 1 | 3 | 1 | 8000   |
| 25 | 823 | 2 | 50 | 2 | 2 | 2 | 3 | 1 | 4000   |
| 26 | 824 | 2 | 70 | 2 | 1 | 2 | 3 | 1 | 20000  |
| 27 | 825 | 2 | 65 | 2 | 2 | 2 | 3 | 1 | 10000  |
| 28 | 826 | 2 | 72 | 1 | 2 | 3 | 2 | 1 | 20000  |
| 29 | 827 | 2 | 60 | 1 | 2 | 3 | 4 | 1 | 30000  |
| 30 | 828 | 2 | 45 | 1 | 2 | 3 | 1 | 1 | 10000  |
| 31 | 829 | 2 | 55 | 1 | 2 | 3 | 4 | 1 | 12000  |
| 32 | 830 | 2 | 56 | 1 | 2 | 3 | 2 | 1 | 100000 |
| 33 | 831 | 2 | 40 | 1 | 2 | 2 | 4 | 1 | 20000  |
| 34 | 832 | 2 | 42 | 1 | 2 | 3 | 1 | 1 | 5000   |
| 35 | 833 | 2 | 59 | 2 | 2 | 2 | 3 | 1 | 10000  |
| 36 | 834 | 2 | 42 | 2 | 1 | 3 | 3 | 1 | 15000  |
| 37 | 835 | 2 | 65 | 2 | 1 | 3 | 3 | 1 | 20000  |
| 38 | 836 | 2 | 54 | 2 | 2 | 1 | 3 | 1 | 5000   |
| 39 | 837 | 2 | 52 | 2 | 2 | 2 | 3 | 1 | 20000  |
| 40 | 838 | 2 | 25 | 2 | 2 | 2 | 3 | 1 | 15000  |
| 41 | 839 | 2 | 50 | 2 | 2 | 2 | 3 | 1 | 6000   |
| 42 | 840 | 2 | 45 | 1 | 2 | 2 | 4 | 1 | 10000  |
| 43 | 841 | 2 | 29 | 1 | 2 | 1 | 4 | 1 | 5000   |
| 44 | 842 | 2 | 55 | 1 | 1 | 2 | 4 | 1 | 20000  |
| 45 | 843 | 2 | 55 | 1 | 1 | 2 | 2 | 1 | 8000   |
| 46 | 844 | 2 | 50 | 2 | 2 | 2 | 3 | 1 | 10000  |
| 47 | 845 | 2 | 22 | 1 | 2 | 4 | 2 | 1 | 8000   |
| 48 | 846 | 2 | 45 | 1 | 2 | 2 | 2 | 1 | 4000   |
| 49 | 847 | 2 | 35 | 1 | 2 | 2 | 4 | 2 | 20000  |
| 50 | 848 | 2 | 45 | 1 | 2 | 1 | 4 | 1 | 10000  |
| 51 | 849 | 2 | 48 | 1 | 2 | 4 | 1 | 1 | 20000  |

|    |     |   |    |   |   |   |   |   |       |
|----|-----|---|----|---|---|---|---|---|-------|
| 1  |     |   |    |   |   |   |   |   |       |
| 2  | 850 | 2 | 30 | 1 | 2 | 3 | 1 | 1 | 30000 |
| 3  | 851 | 2 | 40 | 1 | 2 | 2 | 4 | 1 | 10000 |
| 4  | 852 | 2 | 42 | 1 | 2 | 3 | 1 | 1 | 40000 |
| 5  | 853 | 2 | 59 | 1 | 2 | 3 | 2 | 1 | 20000 |
| 6  | 854 | 2 | 92 | 2 | 2 | 2 | 3 | 1 | 1500  |
| 7  | 855 | 2 | 50 | 1 | 2 | 3 | 1 | 1 | 30000 |
| 8  | 856 | 2 | 54 | 1 | 2 | 1 | 4 | 1 | 5000  |
| 9  | 857 | 2 | 27 | 1 | 1 | 1 | 3 | 1 | 10000 |
| 10 | 858 | 2 | 59 | 1 | 2 | 2 | 2 | 1 | 12000 |
| 11 | 859 | 2 | 55 | 1 | 1 | 4 | 1 | 1 | 10000 |
| 12 | 860 | 2 | 48 | 1 | 2 | 4 | 1 | 1 | 18000 |
| 13 | 861 | 2 | 22 | 1 | 2 | 3 | 2 | 1 | 8000  |
| 14 | 862 | 2 | 52 | 1 | 1 | 4 | 4 | 1 | 10000 |
| 15 | 863 | 2 | 35 | 1 | 1 | 3 | 2 | 1 | 10000 |
| 16 | 864 | 2 | 20 | 1 | 1 | 4 | 1 | 1 | 6000  |
| 17 | 865 | 2 | 35 | 1 | 2 | 4 | 1 | 1 | 5000  |
| 18 | 866 | 2 | 58 | 1 | 2 | 2 | 4 | 1 | 60000 |
| 19 | 867 | 2 | 49 | 1 | 2 | 4 | 1 | 1 | 9000  |
| 20 | 868 | 2 | 47 | 1 | 2 | 2 | 4 | 1 | 30000 |
| 21 | 869 | 2 | 58 | 1 | 2 | 4 | 2 | 1 | 5000  |
| 22 | 870 | 2 | 55 | 1 | 2 | 3 | 1 | 1 | 6000  |
| 23 | 871 | 2 | 50 | 1 | 1 | 3 | 4 | 1 | 40000 |
| 24 | 872 | 2 | 60 | 1 | 2 | 1 | 4 | 1 | 20000 |
| 25 | 873 | 2 | 51 | 1 | 2 | 4 | 2 | 1 | 15000 |
| 26 | 874 | 2 | 60 | 1 | 1 | 3 | 4 | 1 | 10000 |
| 27 | 875 | 2 | 59 | 1 | 2 | 1 | 4 | 1 | 40000 |
| 28 | 876 | 2 | 55 | 1 | 2 | 1 | 4 | 1 | 20000 |
| 29 | 877 | 2 | 35 | 1 | 2 | 3 | 1 | 1 | 5000  |
| 30 | 878 | 2 | 48 | 2 | 2 | 2 | 3 | 1 | 3000  |
| 31 | 879 | 2 | 56 | 2 | 2 | 1 | 3 | 1 | 10000 |
| 32 | 880 | 2 | 46 | 2 | 2 | 1 | 4 | 1 | 40000 |
| 33 | 881 | 2 | 45 | 2 | 1 | 2 | 3 | 1 | 20000 |
| 34 | 882 | 2 | 45 | 2 | 1 | 2 | 3 | 1 | 40000 |
| 35 | 883 | 2 | 58 | 2 | 2 | 2 | 3 | 1 | 3000  |
| 36 | 884 | 2 | 73 | 2 | 2 | 2 | 3 | 1 | 10000 |
| 37 | 885 | 2 | 48 | 2 | 2 | 1 | 3 | 1 | 15000 |
| 38 | 886 | 2 | 43 | 2 | 2 | 2 | 3 | 1 | 4000  |
| 39 | 887 | 2 | 45 | 2 | 2 | 2 | 3 | 1 | 12000 |
| 40 | 888 | 2 | 39 | 2 | 2 | 2 | 3 | 1 | 10000 |
| 41 | 889 | 2 | 55 | 2 | 2 | 2 | 3 | 1 | 15000 |
| 42 | 890 | 2 | 55 | 2 | 2 | 2 | 3 | 1 | 14000 |
| 43 | 891 | 2 | 35 | 2 | 2 | 1 | 3 | 1 | 4000  |
| 44 | 892 | 2 | 52 | 2 | 2 | 2 | 3 | 1 | 5000  |
| 45 | 893 | 2 | 30 | 2 | 2 | 2 | 3 | 1 | 4000  |
| 46 | 894 | 2 | 44 | 2 | 2 | 2 | 3 | 1 | 3000  |
| 47 | 895 | 2 | 66 | 2 | 2 | 3 | 3 | 1 | 2000  |
| 48 | 896 | 2 | 59 | 2 | 1 | 2 | 3 | 1 | 30000 |
| 49 | 897 | 2 | 44 | 1 | 2 | 1 | 4 | 1 | 7000  |
| 50 | 898 | 2 | 33 | 2 | 2 | 2 | 3 | 1 | 10000 |
| 51 | 899 | 2 | 34 | 2 | 2 | 3 | 3 | 1 | 10000 |



|    |     |   |    |   |   |   |   |   |       |
|----|-----|---|----|---|---|---|---|---|-------|
| 1  |     |   |    |   |   |   |   |   |       |
| 2  | 900 | 2 | 58 | 2 | 2 | 1 | 3 | 1 | 25000 |
| 3  | 901 | 2 | 54 | 2 | 2 | 2 | 3 | 1 | 15000 |
| 4  | 902 | 2 | 57 | 2 | 2 | 3 | 3 | 1 | 60000 |
| 5  | 903 | 2 | 50 | 2 | 1 | 3 | 3 | 1 | 12000 |
| 6  | 904 | 2 | 46 | 2 | 2 | 3 | 3 | 1 | 20000 |
| 7  | 905 | 2 | 25 | 2 | 2 | 2 | 3 | 1 | 25000 |
| 8  | 906 | 2 | 47 | 2 | 2 | 1 | 3 | 1 | 10000 |
| 9  | 907 | 2 | 55 | 2 | 2 | 2 | 3 | 1 | 40000 |
| 10 | 908 | 2 | 60 | 2 | 1 | 1 | 3 | 1 | 10000 |
| 11 | 909 | 2 | 63 | 2 | 2 | 2 | 3 | 1 | 20000 |
| 12 | 910 | 2 | 52 | 2 | 1 | 2 | 3 | 1 | 10000 |
| 13 | 911 | 2 | 45 | 2 | 2 | 2 | 3 | 1 | 30000 |
| 14 | 912 | 2 | 54 | 2 | 1 | 4 | 1 | 1 | 40000 |
| 15 | 913 | 2 | 36 | 2 | 2 | 2 | 4 | 1 | 15000 |
| 16 | 914 | 2 | 40 | 2 | 2 | 2 | 2 | 1 | 10000 |
| 17 | 915 | 2 | 68 | 2 | 1 | 1 | 3 | 1 | 3000  |
| 18 | 916 | 2 | 58 | 2 | 1 | 1 | 3 | 1 | 50000 |
| 19 | 917 | 2 | 45 | 2 | 2 | 2 | 3 | 1 | 15000 |
| 20 | 918 | 2 | 62 | 2 | 1 | 3 | 4 | 1 | 11000 |
| 21 | 919 | 2 | 40 | 2 | 2 | 2 | 2 | 1 | 9000  |
| 22 | 920 | 2 | 57 | 2 | 1 | 2 | 3 | 1 | 50000 |
| 23 | 921 | 2 | 40 | 2 | 2 | 3 | 3 | 1 | 60000 |
| 24 | 922 | 2 | 45 | 2 | 2 | 1 | 4 | 1 | 20000 |
| 25 | 923 | 2 | 51 | 2 | 2 | 1 | 3 | 1 | 7000  |
| 26 | 924 | 2 | 56 | 2 | 2 | 3 | 3 | 1 | 10000 |
| 27 | 925 | 2 | 35 | 2 | 2 | 1 | 3 | 1 | 20000 |
| 28 | 926 | 2 | 75 | 2 | 2 | 1 | 3 | 1 | 20000 |
| 29 | 927 | 2 | 60 | 2 | 1 | 3 | 1 | 1 | 7000  |
| 30 | 928 | 2 | 56 | 2 | 2 | 2 | 3 | 1 | 20000 |
| 31 | 929 | 2 | 57 | 2 | 2 | 1 | 3 | 1 | 7000  |
| 32 | 930 | 2 | 72 | 2 | 1 | 3 | 1 | 1 | 3000  |
| 33 | 931 | 2 | 56 | 2 | 2 | 2 | 3 | 1 | 15000 |
| 34 | 932 | 2 | 60 | 2 | 2 | 3 | 3 | 1 | 6000  |
| 35 | 933 | 2 | 53 | 2 | 2 | 1 | 3 | 1 | 20000 |
| 36 | 934 | 2 | 40 | 2 | 2 | 1 | 3 | 1 | 5000  |
| 37 | 935 | 2 | 55 | 2 | 2 | 4 | 4 | 1 | 30000 |
| 38 | 936 | 2 | 67 | 2 | 1 | 1 | 3 | 1 | 15000 |
| 39 | 937 | 2 | 50 | 2 | 1 | 1 | 3 | 1 | 20000 |
| 40 | 938 | 2 | 47 | 2 | 1 | 1 | 3 | 1 | 3000  |
| 41 | 939 | 2 | 57 | 2 | 2 | 2 | 3 | 1 | 16000 |
| 42 | 940 | 2 | 27 | 2 | 1 | 4 | 3 | 1 | 5000  |
| 43 | 941 | 2 | 50 | 2 | 2 | 2 | 3 | 1 | 12000 |
| 44 | 942 | 2 | 53 | 2 | 2 | 2 | 3 | 1 | 15000 |
| 45 | 943 | 2 | 45 | 2 | 1 | 3 | 3 | 1 | 5000  |
| 46 | 944 | 2 | 52 | 2 | 2 | 3 | 3 | 1 | 30000 |
| 47 | 945 | 2 | 40 | 2 | 1 | 2 | 3 | 1 | 4000  |
| 48 | 946 | 2 | 47 | 1 | 1 | 3 | 1 | 1 | 5000  |
| 49 | 947 | 2 | 50 | 2 | 2 | 3 | 1 | 1 | 20000 |
| 50 | 948 | 2 | 50 | 2 | 1 | 3 | 1 | 2 | 8000  |
| 51 | 949 | 2 | 58 | 2 | 1 | 2 | 3 | 1 | 15000 |

|    |     |   |    |   |   |   |   |   |        |
|----|-----|---|----|---|---|---|---|---|--------|
| 1  |     |   |    |   |   |   |   |   |        |
| 2  | 950 | 2 | 50 | 2 | 1 | 3 | 1 | 1 | 8000   |
| 3  | 951 | 2 | 32 | 2 | 1 | 3 | 3 | 1 | 7000   |
| 4  | 952 | 2 | 40 | 2 | 1 | 2 | 3 | 1 | 10000  |
| 5  | 953 | 2 | 70 | 2 | 1 | 3 | 1 | 1 | 20000  |
| 6  | 954 | 2 | 50 | 2 | 1 | 3 | 3 | 1 | 16000  |
| 7  | 955 | 2 | 38 | 2 | 1 | 3 | 1 | 1 | 15000  |
| 8  | 956 | 2 | 49 | 2 | 2 | 2 | 3 | 1 | 35000  |
| 9  | 957 | 2 | 55 | 2 | 2 | 2 | 3 | 1 | 19000  |
| 10 | 958 | 2 | 35 | 2 | 2 | 2 | 3 | 1 | 7000   |
| 11 | 959 | 2 | 66 | 2 | 1 | 2 | 3 | 1 | 150000 |
| 12 | 960 | 2 | 57 | 2 | 1 | 3 | 1 | 1 | 22000  |
| 13 | 961 | 2 | 55 | 2 | 2 | 1 | 3 | 1 | 6000   |
| 14 | 962 | 2 | 65 | 2 | 1 | 3 | 1 | 1 | 6000   |
| 15 | 963 | 2 | 55 | 2 | 1 | 2 | 3 | 1 | 10000  |
| 16 | 964 | 2 | 50 | 2 | 2 | 2 | 3 | 1 | 6000   |
| 17 | 965 | 2 | 73 | 2 | 2 | 2 | 3 | 1 | 30000  |
| 18 | 966 | 2 | 59 | 2 | 2 | 3 | 3 | 1 | 15000  |
| 19 | 967 | 2 | 65 | 2 | 1 | 3 | 3 | 1 | 30000  |
| 20 | 968 | 2 | 60 | 2 | 1 | 2 | 3 | 1 | 5000   |
| 21 | 969 | 2 | 50 | 1 | 2 | 3 | 4 | 1 | 9000   |
| 22 | 970 | 2 | 56 | 1 | 2 | 4 | 1 | 1 | 20000  |
| 23 | 971 | 2 | 50 | 1 | 2 | 3 | 2 | 1 | 5000   |
| 24 | 972 | 2 | 75 | 1 | 1 | 3 | 2 | 1 | 7000   |
| 25 | 973 | 2 | 80 | 1 | 2 | 1 | 4 | 1 | 7000   |
| 26 | 974 | 2 | 60 | 1 | 2 | 2 | 4 | 2 | 20000  |
| 27 | 975 | 2 | 78 | 1 | 2 | 3 | 2 | 1 | 1000   |
| 28 | 976 | 2 | 52 | 1 | 1 | 3 | 1 | 1 | 20000  |
| 29 | 977 | 2 | 60 | 1 | 1 | 4 | 1 | 1 | 20000  |
| 30 | 978 | 2 | 51 | 1 | 2 | 1 | 4 | 1 | 12000  |
| 31 | 979 | 2 | 45 | 1 | 2 | 2 | 4 | 1 | 5000   |
| 32 | 980 | 2 | 60 | 1 | 1 | 4 | 4 | 1 | 20000  |
| 33 | 981 | 2 | 45 | 1 | 2 | 3 | 4 | 1 | 7000   |
| 34 | 982 | 2 | 67 | 1 | 2 | 3 | 4 | 1 | 8500   |
| 35 | 983 | 2 | 40 | 1 | 2 | 3 | 1 | 1 | 20000  |
| 36 | 984 | 2 | 63 | 1 | 2 | 3 | 1 | 1 | 8000   |
| 37 | 985 | 2 | 50 | 2 | 1 | 2 | 3 | 1 | 5000   |
| 38 | 986 | 2 | 35 | 2 | 2 | 1 | 3 | 1 | 7000   |
| 39 | 987 | 2 | 47 | 2 | 2 | 2 | 3 | 1 | 20000  |
| 40 | 988 | 2 | 50 | 2 | 2 | 3 | 3 | 1 | 10000  |
| 41 | 989 | 2 | 62 | 2 | 1 | 3 | 1 | 1 | 40000  |
| 42 | 990 | 2 | 62 | 2 | 1 | 2 | 3 | 1 | 10000  |
| 43 | 991 | 2 | 65 | 2 | 2 | 1 | 3 | 1 | 10000  |
| 44 | 992 | 2 | 62 | 2 | 1 | 2 | 3 | 1 | 5000   |
| 45 | 993 | 2 | 66 | 2 | 1 | 3 | 3 | 1 | 150000 |
| 46 | 994 | 2 | 73 | 2 | 1 | 3 | 3 | 1 | 15000  |
| 47 | 995 | 2 | 48 | 2 | 1 | 2 | 3 | 1 | 10000  |
| 48 | 996 | 2 | 50 | 2 | 2 | 3 | 3 | 1 | 12000  |
| 49 | 997 | 2 | 57 | 2 | 1 | 3 | 3 | 1 | 20000  |
| 50 | 998 | 2 | 47 | 2 | 1 | 3 | 3 | 1 | 25000  |
| 51 | 999 | 2 | 55 | 2 | 2 | 2 | 3 | 1 | 8000   |

|    |      |   |    |   |   |   |   |   |       |
|----|------|---|----|---|---|---|---|---|-------|
| 1  |      |   |    |   |   |   |   |   |       |
| 2  | 1000 | 2 | 40 | 2 | 2 | 2 | 3 | 1 | 10000 |
| 3  | 1001 | 2 | 45 | 2 | 2 | 2 | 3 | 1 | 8000  |
| 4  | 1002 | 2 | 62 | 2 | 1 | 4 | 1 | 1 | 10000 |
| 5  | 1003 | 2 | 45 | 2 | 1 | 3 | 3 | 1 | 15000 |
| 6  | 1004 | 2 | 46 | 2 | 1 | 2 | 1 | 1 | 35000 |
| 8  | 1005 | 2 | 55 | 2 | 2 | 1 | 3 | 1 | 10000 |
| 9  | 1006 | 2 | 59 | 2 | 1 | 3 | 3 | 1 | 5000  |
| 10 | 1007 | 2 | 74 | 2 | 1 | 3 | 3 | 1 | 5000  |
| 11 | 1008 | 2 | 60 | 2 | 1 | 3 | 3 | 1 | 10000 |
| 12 | 1009 | 2 | 70 | 2 | 1 | 2 | 3 | 1 | 4000  |
| 14 | 1010 | 2 | 60 | 2 | 2 | 2 | 3 | 1 | 15000 |
| 15 | 1011 | 2 | 63 | 2 | 1 | 3 | 3 | 1 | 7000  |
| 16 | 1012 | 2 | 62 | 2 | 1 | 2 | 3 | 1 | 5000  |
| 17 | 1013 | 2 | 70 | 2 | 1 | 3 | 3 | 1 | 20000 |
| 18 | 1014 | 2 | 43 | 1 | 1 | 3 | 1 | 1 | 22000 |
| 20 | 1015 | 2 | 50 | 1 | 2 | 1 | 2 | 1 | 6000  |
| 21 | 1016 | 2 | 45 | 2 | 2 | 3 | 1 | 1 | 15000 |
| 22 | 1017 | 2 | 63 | 2 | 2 | 3 | 2 | 1 | 15000 |
| 23 | 1018 | 2 | 63 | 1 | 1 | 4 | 1 | 1 | 20000 |
| 24 | 1019 | 2 | 35 | 2 | 2 | 1 | 3 | 1 | 4000  |
| 25 | 1020 | 2 | 60 | 2 | 2 | 2 | 3 | 1 | 15000 |
| 27 | 1021 | 2 | 73 | 2 | 2 | 1 | 3 | 1 | 10000 |
| 28 | 1022 | 2 | 58 | 2 | 2 | 3 | 3 | 1 | 15000 |
| 29 | 1023 | 2 | 40 | 2 | 2 | 3 | 1 | 1 | 15000 |
| 30 | 1024 | 2 | 65 | 2 | 2 | 2 | 3 | 1 | 9000  |
| 32 | 1025 | 2 | 50 | 2 | 2 | 1 | 3 | 1 | 10000 |
| 33 | 1026 | 2 | 45 | 2 | 2 | 2 | 1 | 1 | 15000 |
| 34 | 1027 | 2 | 35 | 2 | 2 | 3 | 1 | 1 | 12000 |
| 35 | 1028 | 2 | 46 | 2 | 2 | 3 | 3 | 1 | 15000 |
| 36 | 1029 | 2 | 63 | 2 | 2 | 1 | 3 | 1 | 12000 |
| 38 | 1030 | 2 | 45 | 2 | 2 | 2 | 1 | 1 | 40000 |
| 39 | 1031 | 2 | 63 | 2 | 2 | 2 | 3 | 1 | 15000 |
| 40 | 1032 | 2 | 45 | 2 | 2 | 1 | 3 | 1 | 9000  |
| 41 | 1033 | 2 | 40 | 2 | 2 | 2 | 3 | 1 | 10000 |
| 42 | 1034 | 2 | 42 | 2 | 2 | 2 | 3 | 1 | 10000 |
| 44 | 1035 | 2 | 61 | 2 | 2 | 2 | 3 | 1 | 18000 |
| 45 | 1036 | 2 | 66 | 2 | 2 | 1 | 3 | 1 | 4000  |
| 46 | 1037 | 2 | 62 | 2 | 2 | 2 | 3 | 1 | 10000 |
| 47 | 1038 | 2 | 60 | 2 | 2 | 2 | 3 | 1 | 10000 |
| 49 | 1039 | 2 | 50 | 2 | 2 | 2 | 3 | 1 | 8000  |
| 50 | 1040 | 2 | 45 | 2 | 2 | 3 | 1 | 1 | 8000  |
| 51 | 1041 | 2 | 45 | 2 | 2 | 2 | 3 | 1 | 5000  |
| 52 | 1042 | 2 | 60 | 2 | 2 | 1 | 3 | 1 | 7000  |
| 53 | 1043 | 2 | 45 | 2 | 1 | 3 | 3 | 1 | 10000 |
| 54 | 1044 | 2 | 60 | 2 | 1 | 3 | 1 | 1 | 5000  |
| 56 | 1045 | 2 | 61 | 2 | 2 | 3 | 3 | 1 | 45000 |
| 57 | 1046 | 2 | 43 | 2 | 1 | 3 | 1 | 1 | 10000 |
| 58 | 1047 | 2 | 69 | 1 | 1 | 4 | 2 | 1 | 10000 |
| 59 | 1048 | 2 | 40 | 2 | 1 | 1 | 3 | 1 | 10000 |
| 60 | 1049 | 2 | 42 | 2 | 1 | 3 | 3 | 1 | 10000 |

|    |      |   |    |   |   |   |   |   |       |
|----|------|---|----|---|---|---|---|---|-------|
| 1  |      |   |    |   |   |   |   |   |       |
| 2  | 1050 | 2 | 62 | 2 | 1 | 3 | 3 | 1 | 15000 |
| 3  | 1051 | 2 | 70 | 2 | 1 | 3 | 3 | 1 | 10000 |
| 4  | 1052 | 2 | 49 | 2 | 1 | 1 | 3 | 1 | 10000 |
| 5  | 1053 | 2 | 58 | 2 | 2 | 1 | 3 | 1 | 45000 |
| 6  | 1054 | 2 | 53 | 2 | 2 | 2 | 3 | 1 | 20000 |
| 7  | 1055 | 2 | 44 | 2 | 1 | 3 | 3 | 1 | 15000 |
| 8  | 1056 | 2 | 40 | 2 | 2 | 2 | 3 | 1 | 15000 |
| 9  | 1057 | 2 | 60 | 2 | 2 | 4 | 1 | 1 | 8000  |
| 10 | 1058 | 2 | 48 | 2 | 1 | 2 | 3 | 1 | 20000 |
| 11 | 1059 | 2 | 56 | 2 | 2 | 1 | 3 | 1 | 30000 |
| 12 | 1060 | 2 | 65 | 2 | 1 | 3 | 3 | 1 | 20000 |
| 13 | 1061 | 2 | 57 | 2 | 1 | 3 | 3 | 1 | 7000  |
| 14 | 1062 | 2 | 70 | 2 | 1 | 1 | 3 | 1 | 20000 |
| 15 | 1063 | 2 | 52 | 2 | 1 | 2 | 3 | 1 | 50000 |
| 16 | 1064 | 2 | 49 | 2 | 2 | 2 | 3 | 1 | 8000  |
| 17 | 1065 | 2 | 60 | 2 | 1 | 1 | 3 | 1 | 70000 |
| 18 | 1066 | 2 | 55 | 2 | 1 | 3 | 1 | 1 | 10000 |
| 19 | 1067 | 2 | 55 | 2 | 1 | 2 | 3 | 1 | 10000 |
| 20 | 1068 | 2 | 93 | 2 | 1 | 3 | 3 | 1 | 50000 |
| 21 | 1069 | 2 | 68 | 2 | 1 | 1 | 3 | 1 | 60000 |
| 22 | 1070 | 2 | 70 | 2 | 2 | 1 | 3 | 1 | 5000  |
| 23 | 1071 | 2 | 60 | 1 | 1 | 3 | 1 | 1 | 8000  |
| 24 | 1072 | 2 | 59 | 1 | 1 | 4 | 1 | 1 | 32000 |
| 25 | 1073 | 2 | 75 | 1 | 1 | 2 | 1 | 1 | 25000 |
| 26 | 1074 | 2 | 80 | 1 | 2 | 3 | 2 | 1 | 30000 |
| 27 | 1075 | 2 | 48 | 1 | 1 | 3 | 1 | 1 | 20000 |
| 28 | 1076 | 2 | 30 | 1 | 1 | 1 | 1 | 1 | 15000 |
| 29 | 1077 | 2 | 44 | 1 | 1 | 4 | 1 | 1 | 30000 |
| 30 | 1078 | 2 | 65 | 1 | 2 | 3 | 1 | 1 | 50000 |
| 31 | 1079 | 2 | 52 | 1 | 1 | 3 | 1 | 1 | 20000 |
| 32 | 1080 | 2 | 47 | 1 | 1 | 2 | 2 | 1 | 15000 |
| 33 | 1081 | 2 | 42 | 1 | 2 | 2 | 4 | 1 | 30000 |
| 34 | 1082 | 2 | 75 | 1 | 1 | 3 | 4 | 1 | 20000 |
| 35 | 1083 | 2 | 50 | 1 | 1 | 2 | 2 | 1 | 5000  |
| 36 | 1084 | 2 | 36 | 1 | 1 | 2 | 1 | 1 | 8000  |
| 37 | 1085 | 2 | 24 | 1 | 2 | 3 | 2 | 1 | 7000  |
| 38 | 1086 | 2 | 47 | 1 | 2 | 4 | 1 | 1 | 10000 |
| 39 | 1087 | 2 | 41 | 1 | 1 | 3 | 1 | 1 | 7000  |
| 40 | 1088 | 2 | 49 | 2 | 1 | 2 | 3 | 1 | 20000 |
| 41 | 1089 | 2 | 35 | 2 | 1 | 1 | 3 | 1 | 30000 |
| 42 | 1090 | 2 | 37 | 2 | 1 | 1 | 3 | 1 | 70000 |
| 43 | 1091 | 2 | 50 | 2 | 1 | 2 | 3 | 1 | 6000  |
| 44 | 1092 | 2 | 50 | 1 | 1 | 3 | 1 | 2 | 40000 |
| 45 | 1093 | 2 | 23 | 1 | 1 | 3 | 4 | 1 | 20000 |
| 46 | 1094 | 2 | 52 | 1 | 1 | 3 | 1 | 1 | 10000 |
| 47 | 1095 | 2 | 30 | 1 | 2 | 1 | 4 | 1 | 7000  |
| 48 | 1096 | 2 | 45 | 2 | 1 | 2 | 3 | 1 | 10000 |
| 49 | 1097 | 2 | 60 | 1 | 2 | 1 | 4 | 1 | 8000  |
| 50 | 1098 | 2 | 42 | 2 | 2 | 1 | 3 | 1 | 12000 |
| 51 | 1099 | 2 | 35 | 2 | 1 | 1 | 3 | 1 | 60000 |

|    |      |   |    |   |   |   |   |   |       |
|----|------|---|----|---|---|---|---|---|-------|
| 1  |      |   |    |   |   |   |   |   |       |
| 2  | 1100 | 2 | 53 | 1 | 1 | 1 | 4 | 1 | 25000 |
| 3  | 1101 | 2 | 70 | 1 | 1 | 3 | 2 | 1 | 10000 |
| 4  | 1102 | 2 | 46 | 2 | 1 | 2 | 3 | 1 | 15000 |
| 5  | 1103 | 2 | 43 | 2 | 2 | 1 | 3 | 1 | 20000 |
| 6  | 1104 | 2 | 49 | 2 | 1 | 2 | 3 | 1 | 20000 |
| 8  | 1105 | 2 | 70 | 1 | 1 | 4 | 1 | 1 | 7000  |
| 9  | 1106 | 2 | 79 | 2 | 1 | 1 | 3 | 1 | 50000 |
| 10 | 1107 | 2 | 25 | 2 | 1 | 3 | 3 | 1 | 50000 |
| 11 | 1108 | 2 | 40 | 1 | 1 | 1 | 4 | 1 | 10000 |
| 12 | 1109 | 2 | 50 | 2 | 1 | 1 | 3 | 1 | 10000 |
| 14 | 1110 | 2 | 30 | 2 | 1 | 1 | 3 | 1 | 50000 |
| 15 | 1111 | 2 | 46 | 1 | 1 | 3 | 2 | 1 | 3000  |
| 16 | 1112 | 2 | 70 | 1 | 2 | 2 | 4 | 1 | 25000 |
| 17 | 1113 | 2 | 35 | 1 | 1 | 4 | 4 | 1 | 5000  |
| 18 | 1114 | 2 | 45 | 1 | 1 | 4 | 1 | 1 | 30000 |
| 20 | 1115 | 2 | 47 | 1 | 1 | 4 | 4 | 1 | 30000 |
| 21 | 1116 | 2 | 65 | 2 | 1 | 1 | 3 | 1 | 15000 |
| 22 | 1117 | 2 | 20 | 2 | 2 | 1 | 3 | 1 | 10000 |
| 23 | 1118 | 2 | 45 | 2 | 2 | 1 | 3 | 1 | 6000  |
| 24 | 1119 | 2 | 55 | 1 | 1 | 1 | 1 | 1 | 10000 |
| 26 | 1120 | 2 | 65 | 2 | 1 | 2 | 3 | 1 | 30000 |
| 27 | 1121 | 2 | 46 | 1 | 1 | 2 | 1 | 1 | 5000  |
| 28 | 1122 | 2 | 45 | 1 | 1 | 4 | 4 | 1 | 10000 |
| 29 | 1123 | 2 | 41 | 1 | 2 | 2 | 2 | 1 | 30000 |
| 30 | 1124 | 2 | 47 | 2 | 2 | 1 | 3 | 1 | 20000 |
| 32 | 1125 | 2 | 55 | 2 | 1 | 2 | 3 | 1 | 10000 |
| 33 | 1126 | 2 | 70 | 2 | 2 | 1 | 3 | 1 | 20000 |
| 34 | 1127 | 2 | 43 | 2 | 1 | 4 | 4 | 1 | 15000 |
| 35 | 1128 | 2 | 55 | 1 | 1 | 3 | 2 | 1 | 7000  |
| 36 | 1129 | 2 | 55 | 2 | 1 | 2 | 3 | 1 | 40000 |
| 38 | 1130 | 2 | 72 | 2 | 1 | 3 | 3 | 1 | 25000 |
| 39 | 1131 | 2 | 40 | 2 | 2 | 1 | 3 | 1 | 20000 |
| 40 | 1132 | 2 | 39 | 1 | 1 | 3 | 1 | 1 | 10000 |
| 41 | 1133 | 2 | 70 | 2 | 1 | 2 | 3 | 1 | 15000 |
| 42 | 1134 | 2 | 50 | 2 | 2 | 1 | 3 | 1 | 15000 |
| 44 | 1135 | 2 | 35 | 1 | 2 | 1 | 4 | 1 | 3000  |
| 45 | 1136 | 2 | 42 | 2 | 1 | 2 | 3 | 1 | 15000 |
| 46 | 1137 | 2 | 50 | 2 | 1 | 4 | 1 | 1 | 7000  |
| 47 | 1138 | 2 | 42 | 2 | 1 | 2 | 3 | 1 | 7000  |
| 48 | 1139 | 2 | 36 | 2 | 2 | 1 | 3 | 1 | 5000  |
| 50 | 1140 | 2 | 55 | 2 | 1 | 1 | 3 | 1 | 10000 |
| 51 | 1141 | 2 | 50 | 1 | 2 | 4 | 1 | 1 | 5000  |
| 52 | 1142 | 2 | 60 | 2 | 1 | 2 | 3 | 1 | 60000 |
| 53 | 1143 | 2 | 45 | 2 | 2 | 2 | 3 | 1 | 10000 |
| 54 | 1144 | 2 | 60 | 1 | 2 | 1 | 4 | 1 | 3000  |
| 56 | 1145 | 2 | 73 | 2 | 2 | 3 | 3 | 1 | 30000 |
| 57 | 1146 | 2 | 90 | 2 | 2 | 2 | 3 | 1 | 4000  |
| 58 | 1147 | 2 | 40 | 2 | 1 | 2 | 3 | 1 | 5000  |
| 59 | 1148 | 2 | 46 | 2 | 1 | 2 | 3 | 1 | 15000 |
| 60 | 1149 | 2 | 56 | 2 | 1 | 1 | 3 | 1 | 15000 |

|    |      |   |    |   |   |   |   |   |       |
|----|------|---|----|---|---|---|---|---|-------|
| 1  |      |   |    |   |   |   |   |   |       |
| 2  | 1150 | 2 | 45 | 2 | 1 | 1 | 3 | 1 | 2000  |
| 3  | 1151 | 2 | 55 | 2 | 1 | 2 | 2 | 1 | 10000 |
| 4  | 1152 | 2 | 42 | 2 | 2 | 2 | 2 | 1 | 10000 |
| 5  | 1153 | 2 | 50 | 2 | 2 | 2 | 3 | 1 | 20000 |
| 6  | 1154 | 2 | 45 | 2 | 2 | 1 | 3 | 1 | 3000  |
| 7  | 1155 | 2 | 42 | 2 | 2 | 2 | 3 | 1 | 30000 |
| 8  | 1156 | 2 | 35 | 2 | 2 | 2 | 3 | 1 | 3000  |
| 9  | 1157 | 2 | 45 | 1 | 2 | 3 | 4 | 1 | 5000  |
| 10 | 1158 | 2 | 42 | 1 | 2 | 4 | 4 | 1 | 10000 |
| 11 | 1159 | 2 | 65 | 2 | 2 | 2 | 3 | 1 | 80000 |
| 12 | 1160 | 2 | 40 | 2 | 2 | 2 | 3 | 1 | 5000  |
| 13 | 1161 | 2 | 55 | 2 | 1 | 1 | 3 | 1 | 10000 |
| 14 | 1162 | 2 | 60 | 1 | 2 | 2 | 2 | 1 | 5000  |
| 15 | 1163 | 2 | 50 | 1 | 2 | 1 | 4 | 1 | 15000 |
| 16 | 1164 | 2 | 47 | 2 | 2 | 1 | 3 | 1 | 15000 |
| 17 | 1165 | 2 | 70 | 1 | 2 | 3 | 4 | 1 | 5000  |
| 18 | 1166 | 2 | 52 | 2 | 1 | 2 | 3 | 1 | 10000 |
| 19 | 1167 | 2 | 40 | 1 | 2 | 3 | 4 | 1 | 20000 |
| 20 | 1168 | 2 | 40 | 2 | 2 | 1 | 3 | 1 | 4000  |
| 21 | 1169 | 2 | 60 | 2 | 2 | 1 | 3 | 1 | 12000 |
| 22 | 1170 | 2 | 46 | 1 | 2 | 4 | 1 | 1 | 15000 |
| 23 | 1171 | 2 | 40 | 1 | 2 | 3 | 4 | 1 | 5000  |
| 24 | 1172 | 2 | 50 | 2 | 1 | 2 | 3 | 1 | 10000 |
| 25 | 1173 | 2 | 50 | 2 | 2 | 1 | 3 | 1 | 8000  |
| 26 | 1174 | 2 | 40 | 2 | 2 | 1 | 3 | 1 | 15000 |
| 27 | 1175 | 2 | 56 | 2 | 1 | 3 | 3 | 1 | 10000 |
| 28 | 1176 | 2 | 60 | 2 | 2 | 2 | 3 | 1 | 3000  |
| 29 | 1177 | 2 | 60 | 1 | 2 | 3 | 2 | 1 | 30000 |
| 30 | 1178 | 2 | 30 | 2 | 2 | 2 | 3 | 1 | 15000 |
| 31 | 1179 | 2 | 40 | 1 | 2 | 3 | 4 | 1 | 3000  |
| 32 | 1180 | 2 | 30 | 2 | 2 | 1 | 3 | 1 | 30000 |
| 33 | 1181 | 2 | 55 | 2 | 2 | 2 | 3 | 1 | 8000  |
| 34 | 1182 | 2 | 60 | 2 | 2 | 1 | 3 | 1 | 20000 |
| 35 | 1183 | 2 | 65 | 2 | 2 | 3 | 3 | 1 | 10000 |
| 36 | 1184 | 2 | 41 | 2 | 2 | 1 | 3 | 1 | 7000  |
| 37 | 1185 | 2 | 60 | 2 | 2 | 2 | 3 | 1 | 6000  |
| 38 | 1186 | 2 | 30 | 2 | 2 | 1 | 3 | 1 | 6000  |
| 39 | 1187 | 2 | 35 | 2 | 2 | 1 | 3 | 1 | 60000 |
| 40 | 1188 | 2 | 56 | 2 | 2 | 1 | 3 | 1 | 30000 |
| 41 | 1189 | 2 | 56 | 2 | 2 | 1 | 3 | 1 | 10000 |
| 42 | 1190 | 2 | 72 | 1 | 2 | 2 | 1 | 1 | 5000  |
| 43 | 1191 | 2 | 65 | 1 | 2 | 3 | 2 | 1 | 20000 |
| 44 | 1192 | 2 | 54 | 1 | 2 | 3 | 1 | 1 | 11500 |
| 45 | 1193 | 2 | 55 | 1 | 2 | 2 | 1 | 1 | 10000 |
| 46 | 1194 | 2 | 45 | 2 | 2 | 2 | 4 | 1 | 10000 |
| 47 | 1195 | 2 | 45 | 1 | 1 | 4 | 1 | 1 | 6000  |
| 48 | 1196 | 2 | 63 | 2 | 2 | 2 | 3 | 1 | 50000 |
| 49 | 1197 | 2 | 70 | 2 | 2 | 1 | 3 | 1 | 40000 |
| 50 | 1198 | 2 | 68 | 2 | 2 | 1 | 3 | 1 | 20000 |
| 51 | 1199 | 2 | 37 | 1 | 1 | 3 | 4 | 1 | 10000 |

|    |      |   |    |   |   |   |   |   |      |
|----|------|---|----|---|---|---|---|---|------|
| 1  |      |   |    |   |   |   |   |   |      |
| 2  | 1200 | 2 | 59 | 2 | 1 | 2 | 4 | 1 | 2500 |
| 3  |      |   |    |   |   |   |   |   |      |
| 4  |      |   |    |   |   |   |   |   |      |
| 5  |      |   |    |   |   |   |   |   |      |
| 6  |      |   |    |   |   |   |   |   |      |
| 7  |      |   |    |   |   |   |   |   |      |
| 8  |      |   |    |   |   |   |   |   |      |
| 9  |      |   |    |   |   |   |   |   |      |
| 10 |      |   |    |   |   |   |   |   |      |
| 11 |      |   |    |   |   |   |   |   |      |
| 12 |      |   |    |   |   |   |   |   |      |
| 13 |      |   |    |   |   |   |   |   |      |
| 14 |      |   |    |   |   |   |   |   |      |
| 15 |      |   |    |   |   |   |   |   |      |
| 16 |      |   |    |   |   |   |   |   |      |
| 17 |      |   |    |   |   |   |   |   |      |
| 18 |      |   |    |   |   |   |   |   |      |
| 19 |      |   |    |   |   |   |   |   |      |
| 20 |      |   |    |   |   |   |   |   |      |
| 21 |      |   |    |   |   |   |   |   |      |
| 22 |      |   |    |   |   |   |   |   |      |
| 23 |      |   |    |   |   |   |   |   |      |
| 24 |      |   |    |   |   |   |   |   |      |
| 25 |      |   |    |   |   |   |   |   |      |
| 26 |      |   |    |   |   |   |   |   |      |
| 27 |      |   |    |   |   |   |   |   |      |
| 28 |      |   |    |   |   |   |   |   |      |
| 29 |      |   |    |   |   |   |   |   |      |
| 30 |      |   |    |   |   |   |   |   |      |
| 31 |      |   |    |   |   |   |   |   |      |
| 32 |      |   |    |   |   |   |   |   |      |
| 33 |      |   |    |   |   |   |   |   |      |
| 34 |      |   |    |   |   |   |   |   |      |
| 35 |      |   |    |   |   |   |   |   |      |
| 36 |      |   |    |   |   |   |   |   |      |
| 37 |      |   |    |   |   |   |   |   |      |
| 38 |      |   |    |   |   |   |   |   |      |
| 39 |      |   |    |   |   |   |   |   |      |
| 40 |      |   |    |   |   |   |   |   |      |
| 41 |      |   |    |   |   |   |   |   |      |
| 42 |      |   |    |   |   |   |   |   |      |
| 43 |      |   |    |   |   |   |   |   |      |
| 44 |      |   |    |   |   |   |   |   |      |
| 45 |      |   |    |   |   |   |   |   |      |
| 46 |      |   |    |   |   |   |   |   |      |
| 47 |      |   |    |   |   |   |   |   |      |
| 48 |      |   |    |   |   |   |   |   |      |
| 49 |      |   |    |   |   |   |   |   |      |
| 50 |      |   |    |   |   |   |   |   |      |
| 51 |      |   |    |   |   |   |   |   |      |
| 52 |      |   |    |   |   |   |   |   |      |
| 53 |      |   |    |   |   |   |   |   |      |
| 54 |      |   |    |   |   |   |   |   |      |
| 55 |      |   |    |   |   |   |   |   |      |
| 56 |      |   |    |   |   |   |   |   |      |
| 57 |      |   |    |   |   |   |   |   |      |
| 58 |      |   |    |   |   |   |   |   |      |
| 59 |      |   |    |   |   |   |   |   |      |
| 60 |      |   |    |   |   |   |   |   |      |

For peer review only

|    | BMI      | 18_dur_DN | insulin_user | Q20_FBG | Q21_RBG | _current_sn6 | _current_ | PA | use_fitting_f |
|----|----------|-----------|--------------|---------|---------|--------------|-----------|----|---------------|
| 1  |          |           |              |         |         |              |           |    |               |
| 2  |          |           |              |         |         |              |           |    |               |
| 3  | 22.22222 | 8         | 2            | 8.9     | 10.9    | 2            | 2         | 2  | 1             |
| 4  | 26.25499 | 2         | 2            | 7.2     | 11.5    | 2            | 2         | 1  | 1             |
| 5  | 25.63117 | 8         | 2            | 6.4     | 10.5    | 2            | 2         | 2  | 1             |
| 6  |          |           |              |         |         |              |           |    |               |
| 7  | 23.55556 | 12        | 2            | 9       | 12      | 2            | 2         | 1  | 1             |
| 8  | 26.57538 | 15        | 1            | 9.8     | 13.5    | 2            | 1         | 1  | 1             |
| 9  | 23.55556 | 11        | 1            | 6.4     | 9.1     | 2            | 2         | 1  | 1             |
| 10 | 24.86395 | 1         | 2            | 5.5     | 8.4     | 2            | 2         | 2  | 1             |
| 11 | 31.73973 | 6         | 1            | 5.7     | 7.8     | 2            | 2         | 2  | 1             |
| 12 |          |           |              |         |         |              |           |    |               |
| 13 | 24       | 20        | 2            | 5.2     | 6.6     | 2            | 1         | 1  | 1             |
| 14 | 29.17489 | 19        | 1            | 7.7     | 12      | 2            | 1         | 2  | 1             |
| 15 | 22.21368 | 11        | 2            | 6.6     | 8.9     | 2            | 1         | 2  | 1             |
| 16 | 22.37034 | 3         | 2            | 6.2     | 11.2    | 2            | 1         | 2  | 1             |
| 17 | 23.82813 | 7         | 2            | 5.5     | 7.8     | 2            | 2         | 1  | 1             |
| 18 | 23.11111 | 14        | 1            | 6.5     | 8.4     | 2            | 2         | 2  | 1             |
| 19 | 36.21228 | 8         | 2            | 7.9     | 8.9     | 2            | 2         | 2  | 1             |
| 20 | 23.55556 | 14        | 1            | 6.3     | 11.5    | 2            | 2         | 2  | 1             |
| 21 |          |           |              |         |         |              |           |    |               |
| 22 | 26.3656  | 13        | 2            | 6.9     | 9.5     | 2            | 2         | 2  | 1             |
| 23 | 21.48438 | 8         | 2            | 3.2     | 11.5    | 2            | 2         | 2  | 1             |
| 24 | 25.91068 | 10        | 2            | 5.8     | 7.2     | 2            | 2         | 1  | 1             |
| 25 | 24.76757 | 2         | 2            | 5.3     | 7.6     | 2            | 1         | 2  | 1             |
| 26 |          |           |              |         |         |              |           |    |               |
| 27 | 25       | 8         | 2            | 7.1     | 14.7    | 2            | 1         | 1  | 1             |
| 28 | 23.8048  | 3         | 1            | 9.7     | 16.9    | 2            | 2         | 1  | 1             |
| 29 | 25.71166 | 15        | 2            | 5.2     | 9.9     | 1            | 2         | 1  | 1             |
| 30 | 23.73996 | 7         | 2            | 9.1     | 11.3    | 2            | 2         | 2  | 1             |
| 31 | 20.80856 | 8         | 2            | 8.5     | 13.6    | 2            | 2         | 2  | 1             |
| 32 | 22.03857 | 2         | 2            | 4.5     | 12.5    | 2            | 2         | 2  | 1             |
| 33 | 24.38653 | 6         | 1            | 5.2     | 9.7     | 1            | 1         | 1  | 1             |
| 34 | 26.12861 | 7         | 2            | 6       | 10.2    | 2            | 2         | 1  | 1             |
| 35 | 22.30815 | 15        | 1            | 7       | 12.7    | 2            | 2         | 2  | 1             |
| 36 | 23.91883 | 3         | 2            | 5.3     | 6.4     | 1            | 1         | 2  | 1             |
| 37 | 24.97399 | 15        | 1            | 4.1     | 7.2     | 2            | 2         | 2  | 2             |
| 38 | 25.81663 | 5         | 2            | 6.6     | 8.6     | 1            | 2         | 2  | 1             |
| 39 | 26.15933 | 19        | 1            | 10      | 18      | 2            | 2         | 1  | 2             |
| 40 | 25.03992 | 13        | 2            | 17.9    | 14.2    | 2            | 2         | 2  | 1             |
| 41 | 20.17715 | 15        | 1            | 10      | 15      | 1            | 2         | 2  | 1             |
| 42 | 24.38237 | 5         | 2            | 6.8     | 13.2    | 2            | 2         | 2  | 1             |
| 43 | 19.00391 | 3         | 2            | 6       | 7.5     | 2            | 2         | 2  | 1             |
| 44 | 28.99931 | 12        | 1            | 4.1     | 7.2     | 2            | 2         | 2  | 1             |
| 45 | 24.14152 | 7         | 1            | 5.9     | 12.5    | 1            | 1         | 1  | 1             |
| 46 | 28.57796 | 12        | 1            | 6.6     | 9.9     | 2            | 1         | 2  | 1             |
| 47 | 23.11111 | 11        | 1            | 6.9     | 10.7    | 2            | 2         | 1  | 1             |
| 48 | 22.10029 | 12        | 1            | 5.8     | 7.2     | 2            | 2         | 2  | 1             |
| 49 | 25.71166 | 10        | 2            | 6.2     | 8.1     | 2            | 1         | 2  | 1             |
| 50 | 25.91068 | 5         | 2            | 4.2     | 9.6     | 1            | 2         | 2  | 2             |
| 51 | 25.63117 | 2         | 2            | 5.9     | 7.7     | 1            | 2         | 1  | 1             |
| 52 | 19.95935 | 17        | 1            | 5       | 8.9     | 2            | 1         | 2  | 1             |
| 53 | 24.53897 | 21        | 1            | 5.9     | 11.1    | 2            | 2         | 2  | 1             |
| 54 | 24.97399 | 16        | 1            | 8.8     | 16      | 1            | 1         | 2  | 1             |
| 55 |          |           |              |         |         |              |           |    |               |
| 56 | 28.959   | 12        | 2            | 5.2     | 6.9     | 2            | 1         | 2  | 1             |



|    |          |    |   |       |      |   |   |   |   |
|----|----------|----|---|-------|------|---|---|---|---|
| 1  |          |    |   |       |      |   |   |   |   |
| 2  | 25.45236 | 6  | 2 | 6.9   | 8.6  | 2 | 2 | 1 | 1 |
| 3  | 28.51563 | 11 | 1 | 6.8   | 11.2 | 2 | 2 | 1 | 1 |
| 4  | 32.88919 | 7  | 2 | 7     | 8.5  | 2 | 2 | 2 | 1 |
| 5  | 26.57313 | 6  | 2 | 6.8   | 8.9  | 2 | 2 | 2 | 1 |
| 6  | 23.55556 | 14 | 1 | 6.7   | 11.9 | 2 | 2 | 2 | 1 |
| 7  | 26.3656  | 7  | 2 | 6.911 | 11.1 | 2 | 2 | 2 | 1 |
| 8  | 23.4375  | 15 | 2 | 7.2   | 8.3  | 2 | 2 | 2 | 2 |
| 9  | 22.03173 | 26 | 1 | 6.2   | 7.2  | 2 | 2 | 2 | 1 |
| 10 | 27.11111 | 23 | 2 | 9     | 13   | 2 | 2 | 2 | 1 |
| 11 | 21.875   | 24 | 2 | 6.7   | 13   | 2 | 2 | 2 | 1 |
| 12 | 29.38476 | 5  | 2 | 6     | 10.5 | 2 | 2 | 1 | 1 |
| 13 | 30.07813 | 3  | 2 | 5.9   | 10.2 | 2 | 2 | 2 | 1 |
| 14 | 22.03857 | 9  | 1 | 5.1   | 8.2  | 2 | 2 | 1 | 1 |
| 15 | 27.91552 | 10 | 2 | 6.4   | 13.9 | 1 | 2 | 2 | 1 |
| 16 | 24.21875 | 20 | 2 | 5.7   | 9.8  | 2 | 1 | 2 | 1 |
| 17 | 17.99015 | 25 | 1 | 6     | 11   | 1 | 1 | 1 | 1 |
| 18 | 27.34375 | 5  | 2 | 5.8   | 9.9  | 2 | 2 | 1 | 1 |
| 19 | 32.46618 | 20 | 2 | 9.3   | 9.9  | 2 | 2 | 2 | 1 |
| 20 | 24.00549 | 3  | 2 | 6.7   | 10.3 | 2 | 1 | 2 | 1 |
| 21 | 24.52435 | 8  | 2 | 8.2   | 11.5 | 2 | 1 | 1 | 1 |
| 22 | 26.29758 | 25 | 2 | 6.4   | 8.4  | 1 | 2 | 1 | 1 |
| 23 | 24.39482 | 1  | 2 | 6.8   | 11   | 2 | 1 | 2 | 1 |
| 24 | 24.79667 | 1  | 1 | 5.2   | 8    | 2 | 2 | 2 | 1 |
| 25 | 23.11111 | 10 | 1 | 8.1   | 12   | 2 | 2 | 2 | 1 |
| 26 | 37.53049 | 1  | 2 | 4.9   | 6.2  | 2 | 2 | 2 | 1 |
| 27 | 22.22222 | 3  | 2 | 5.8   | 8    | 2 | 1 | 2 | 1 |
| 28 | 23.11111 | 1  | 2 | 7.2   | 11.2 | 2 | 2 | 2 | 1 |
| 29 | 24.64665 | 12 | 2 | 8.8   | 14.4 | 2 | 1 | 2 | 1 |
| 30 | 30.29778 | 10 | 2 | 5.3   | 7.2  | 2 | 2 | 2 | 1 |
| 31 | 27.8488  | 10 | 1 | 6.5   | 10.8 | 2 | 2 | 1 | 1 |
| 32 | 22.82688 | 10 | 1 | 7.4   | 8.4  | 2 | 2 | 1 | 2 |
| 33 | 25.5102  | 12 | 2 | 6.4   | 7.8  | 2 | 1 | 1 | 1 |
| 34 | 25.78125 | 1  | 2 | 6.2   | 7.5  | 2 | 2 | 2 | 1 |
| 35 | 28.06894 | 5  | 2 | 7.4   | 13.5 | 2 | 2 | 1 | 1 |
| 36 | 22.0741  | 15 | 2 | 6.7   | 7.4  | 2 | 2 | 2 | 2 |
| 37 | 23.42237 | 3  | 2 | 6.9   | 9.2  | 2 | 2 | 1 | 2 |
| 38 | 28.93407 | 6  | 2 | 7     | 10.8 | 2 | 2 | 1 | 1 |
| 39 | 21.64127 | 2  | 2 | 7.2   | 10.7 | 2 | 2 | 2 | 1 |
| 40 | 26.17188 | 8  | 2 | 6.6   | 8.1  | 2 | 1 | 1 | 1 |
| 41 | 29.35752 | 5  | 2 | 6.8   | 12.1 | 2 | 2 | 2 | 1 |
| 42 | 27.20961 | 2  | 2 | 5.1   | 6.1  | 2 | 2 | 1 | 1 |
| 43 | 25.56611 | 5  | 2 | 6.6   | 7.6  | 2 | 2 | 1 | 1 |
| 44 | 23.8048  | 5  | 2 | 6.1   | 11.6 | 2 | 2 | 1 | 1 |
| 45 | 24.00549 | 10 | 1 | 6     | 10.4 | 2 | 2 | 2 | 2 |
| 46 | 23.73996 | 16 | 1 | 8.3   | 10.8 | 2 | 2 | 1 | 1 |
| 47 | 29.08613 | 5  | 2 | 6.4   | 8.8  | 2 | 2 | 2 | 1 |
| 48 | 25.91068 | 8  | 2 | 7.2   | 13.7 | 2 | 1 | 1 | 1 |
| 49 | 17.77778 | 1  | 2 | 7.2   | 11.9 | 2 | 2 | 2 | 1 |
| 50 | 24.30462 | 1  | 2 | 7.9   | 13   | 2 | 2 | 2 | 1 |
| 51 | 25.5102  | 1  | 2 | 8.1   | 10.1 | 2 | 2 | 1 | 2 |

|    |          |    |   |      |      |   |   |   |   |
|----|----------|----|---|------|------|---|---|---|---|
| 1  |          |    |   |      |      |   |   |   |   |
| 2  | 24.97399 | 6  | 2 | 9.2  | 11   | 2 | 2 | 1 | 1 |
| 3  | 28.98114 | 2  | 1 | 11.6 | 14.2 | 2 | 2 | 2 | 1 |
| 4  | 28.30385 | 19 | 1 | 6.2  | 7.9  | 2 | 2 | 2 | 1 |
| 5  | 27.20961 | 2  | 2 | 4.3  | 4.9  | 2 | 1 | 2 | 1 |
| 6  | 27.76621 | 5  | 2 | 6    | 10   | 2 | 2 | 1 | 1 |
| 7  | 20.3428  | 4  | 2 | 11   | 13   | 2 | 1 | 2 | 1 |
| 8  | 27.99302 | 7  | 2 | 8    | 9    | 2 | 2 | 1 | 1 |
| 9  | 23.23346 | 2  | 2 | 7    | 10   | 2 | 2 | 1 | 1 |
| 10 | 26.27135 | 2  | 2 | 8    | 9    | 2 | 2 | 1 | 1 |
| 11 | 19.43635 | 5  | 2 | 9    | 14   | 2 | 2 | 1 | 1 |
| 12 | 28.06894 | 20 | 1 | 5    | 9    | 2 | 2 | 2 | 1 |
| 13 | 25.67452 | 8  | 2 | 4    | 7    | 2 | 2 | 2 | 1 |
| 14 | 32.89474 | 14 | 1 | 7    | 9    | 2 | 1 | 1 | 1 |
| 15 | 29.67495 | 2  | 2 | 6.5  | 7    | 2 | 2 | 2 | 1 |
| 16 | 32.51821 | 7  | 2 | 8    | 10   | 2 | 2 | 2 | 1 |
| 17 | 26.83518 | 3  | 2 | 7    | 13   | 2 | 1 | 2 | 1 |
| 18 | 27.70083 | 15 | 2 | 6    | 9    | 2 | 1 | 2 | 1 |
| 19 | 24.83576 | 3  | 2 | 7    | 14   | 2 | 2 | 1 | 1 |
| 20 | 24.76757 | 19 | 1 | 7    | 12   | 2 | 2 | 1 | 1 |
| 21 | 24.65303 | 20 | 1 | 7    | 9    | 2 | 1 | 2 | 1 |
| 22 | 25.20398 | 12 | 2 | 7    | 10   | 2 | 2 | 1 | 1 |
| 23 | 29.34129 | 2  | 2 | 6    | 8    | 2 | 1 | 2 | 1 |
| 24 | 27.55556 | 10 | 1 | 8    | 4    | 2 | 2 | 2 | 1 |
| 25 | 24       | 5  | 1 | 7    | 6    | 2 | 2 | 1 | 1 |
| 26 | 23.42209 | 20 | 2 | 8    | 11   | 2 | 2 | 2 | 1 |
| 27 | 26.40236 | 16 | 1 | 7    | 10   | 2 | 1 | 2 | 1 |
| 28 | 29.43213 | 2  | 2 | 6    | 8    | 2 | 2 | 2 | 1 |
| 29 | 25.55885 | 8  | 2 | 6    | 14   | 2 | 2 | 2 | 1 |
| 30 | 22.93975 | 14 | 2 | 13   | 17   | 2 | 2 | 2 | 1 |
| 31 | 29.08613 | 3  | 2 | 11   | 16   | 2 | 1 | 2 | 1 |
| 32 | 24.21875 | 4  | 2 | 4    | 7    | 2 | 2 | 1 | 1 |
| 33 | 21.36752 | 15 | 1 | 10   | 17   | 2 | 2 | 1 | 2 |
| 34 | 29.51594 | 6  | 2 | 8    | 11   | 2 | 1 | 1 | 1 |
| 35 | 18.75    | 1  | 2 | 5    | 7    | 2 | 2 | 1 | 1 |
| 36 | 22.0741  | 2  | 2 | 6    | 14   | 2 | 2 | 1 | 1 |
| 37 | 33.28402 | 10 | 2 | 12   | 14   | 2 | 2 | 1 | 1 |
| 38 | 26.83518 | 17 | 2 | 8    | 11   | 2 | 2 | 1 | 1 |
| 39 | 21.1109  | 5  | 2 | 9    | 10   | 2 | 2 | 2 | 1 |
| 40 | 26.22269 | 20 | 1 | 7    | 10   | 2 | 2 | 1 | 1 |
| 41 | 30.49353 | 9  | 2 | 8    | 11   | 2 | 1 | 2 | 1 |
| 42 | 27.55556 | 17 | 2 | 9    | 12   | 2 | 2 | 2 | 1 |
| 43 | 27.18163 | 6  | 2 | 13   | 18   | 2 | 2 | 2 | 1 |
| 44 | 27.00617 | 5  | 2 | 7    | 9    | 2 | 2 | 2 | 1 |
| 45 | 26.03749 | 10 | 2 | 4    | 14   | 2 | 2 | 1 | 2 |
| 46 | 24       | 2  | 2 | 7    | 9    | 2 | 2 | 2 | 2 |
| 47 | 28.76187 | 16 | 2 | 10   | 11   | 2 | 2 | 1 | 1 |
| 48 | 23.83301 | 1  | 2 | 6    | 9    | 2 | 2 | 2 | 1 |
| 49 | 23.83301 | 1  | 2 | 5    | 6    | 2 | 2 | 2 | 1 |
| 50 | 23.8054  | 15 | 2 | 9    | 10   | 2 | 2 | 2 | 1 |
| 51 | 22.89282 | 5  | 1 | 9    | 11   | 2 | 2 | 2 | 1 |

|    |          |    |   |     |     |   |   |   |   |
|----|----------|----|---|-----|-----|---|---|---|---|
| 1  |          |    |   |     |     |   |   |   |   |
| 2  | 32       | 4  | 2 | 10  | 12  | 2 | 2 | 1 | 1 |
| 3  | 23.87512 | 1  | 2 | 6.4 | 7.2 | 2 | 2 | 1 | 1 |
| 4  | 29.09428 | 5  | 2 | 6   | 10  | 2 | 2 | 2 | 1 |
| 5  | 26.29849 | 18 | 2 | 9   | 10  | 2 | 2 | 2 | 1 |
| 6  | 29.41744 | 17 | 2 | 11  | 12  | 2 | 2 | 2 | 2 |
| 7  | 22.50693 | 6  | 2 | 9   | 16  | 2 | 2 | 1 | 1 |
| 8  | 24.31412 | 5  | 2 | 7   | 11  | 2 | 2 | 2 | 1 |
| 9  | 28.13366 | 17 | 2 | 14  | 24  | 2 | 2 | 2 | 1 |
| 10 | 33.77778 | 1  | 2 | 6   | 8   | 2 | 1 | 2 | 2 |
| 11 | 30.13148 | 5  | 2 | 7   | 13  | 2 | 1 | 2 | 1 |
| 12 | 31.07968 | 1  | 2 | 7   | 11  | 2 | 2 | 1 | 1 |
| 13 | 24.74745 | 8  | 2 | 5   | 6   | 2 | 2 | 2 | 1 |
| 14 | 23.8054  | 5  | 2 | 14  | 19  | 2 | 2 | 1 | 1 |
| 15 | 20.44444 | 1  | 2 | 5   | 9   | 2 | 2 | 1 | 1 |
| 16 | 29.86496 | 1  | 2 | 8   | 11  | 2 | 1 | 2 | 1 |
| 17 | 23.61275 | 9  | 2 | 13  | 17  | 2 | 1 | 2 | 1 |
| 18 | 28.76187 | 7  | 1 | 11  | 14  | 2 | 1 | 2 | 1 |
| 19 | 33.7325  | 4  | 2 | 6   | 8   | 2 | 1 | 2 | 1 |
| 20 | 31.90092 | 9  | 1 | 6   | 10  | 2 | 2 | 2 | 1 |
| 21 | 23.95123 | 12 | 2 | 11  | 13  | 2 | 1 | 2 | 1 |
| 22 | 21.20845 | 9  | 2 | 12  | 13  | 2 | 1 | 2 | 1 |
| 23 | 28.88889 | 1  | 2 | 6   | 11  | 2 | 2 | 1 | 2 |
| 24 | 29.26007 | 25 | 2 | 14  | 22  | 2 | 2 | 2 | 2 |
| 25 | 33.32756 | 16 | 2 | 7   | 12  | 2 | 2 | 1 | 2 |
| 26 | 31.5011  | 7  | 2 | 3   | 12  | 2 | 2 | 1 | 1 |
| 27 | 21.33821 | 3  | 2 | 7   | 8   | 2 | 2 | 2 | 1 |
| 28 | 25.10957 | 8  | 2 | 6   | 7   | 2 | 2 | 1 | 1 |
| 29 | 22.18364 | 16 | 2 | 9   | 16  | 2 | 2 | 1 | 1 |
| 30 | 28.88889 | 10 | 2 | 8   | 12  | 2 | 2 | 2 | 1 |
| 31 | 20.70082 | 11 | 2 | 5   | 6   | 2 | 2 | 1 | 1 |
| 32 | 22.67995 | 12 | 2 | 9   | 14  | 2 | 2 | 2 | 1 |
| 33 | 25.5367  | 30 | 2 | 14  | 16  | 2 | 1 | 2 | 1 |
| 34 | 27.29322 | 8  | 2 | 8   | 9   | 2 | 2 | 1 | 1 |
| 35 | 26.95313 | 2  | 2 | 6   | 7   | 2 | 2 | 1 | 2 |
| 36 | 27.55556 | 7  | 2 | 7   | 9   | 2 | 2 | 2 | 2 |
| 37 | 23.92242 | 22 | 2 | 8   | 18  | 2 | 2 | 1 | 2 |
| 38 | 21.21914 | 1  | 2 | 8   | 10  | 2 | 2 | 2 | 1 |
| 39 | 28       | 8  | 2 | 9   | 11  | 2 | 2 | 2 | 1 |
| 40 | 25.5367  | 25 | 2 | 6   | 8   | 2 | 2 | 1 | 2 |
| 41 | 25.80221 | 17 | 2 | 20  | 22  | 2 | 2 | 2 | 1 |
| 42 | 34.29355 | 2  | 1 | 10  | 12  | 2 | 2 | 1 | 2 |
| 43 | 25.5367  | 6  | 2 | 10  | 11  | 2 | 1 | 2 | 1 |
| 44 | 26.66667 | 5  | 2 | 6   | 16  | 2 | 2 | 1 | 1 |
| 45 | 24.65483 | 12 | 2 | 7   | 10  | 2 | 2 | 2 | 1 |
| 46 | 32.87311 | 9  | 1 | 8   | 12  | 2 | 2 | 2 | 1 |
| 47 | 29.77778 | 4  | 2 | 6   | 11  | 2 | 2 | 2 | 2 |
| 48 | 32.46614 | 7  | 2 | 5   | 9   | 2 | 2 | 1 | 1 |
| 49 | 32.29787 | 5  | 2 | 8   | 10  | 2 | 1 | 2 | 1 |
| 50 | 24.38653 | 4  | 2 | 7   | 8   | 2 | 2 | 1 | 2 |
| 51 | 33.32756 | 1  | 2 | 5   | 8   | 2 | 2 | 2 | 1 |

|    |          |    |   |      |      |   |   |   |   |
|----|----------|----|---|------|------|---|---|---|---|
| 1  |          |    |   |      |      |   |   |   |   |
| 2  | 21.64127 | 8  | 1 | 9    | 12   | 2 | 2 | 2 | 1 |
| 3  | 25.33333 | 6  | 2 | 17.4 | 8.4  | 2 | 1 | 2 | 2 |
| 4  | 26.47918 | 5  | 2 | 11.8 | 14.5 | 2 | 2 | 2 | 2 |
| 5  | 30.29778 | 1  | 2 | 5.6  | 13   | 2 | 2 | 1 | 2 |
| 6  | 24.55775 | 5  | 2 | 7.9  | 9.1  | 2 | 2 | 1 | 1 |
| 7  | 29.27796 | 20 | 2 | 9.4  | 12.5 | 2 | 2 | 2 | 1 |
| 8  | 21.63115 | 3  | 1 | 9    | 11.2 | 2 | 2 | 2 | 1 |
| 9  | 23.8054  | 3  | 2 | 8.7  | 13.3 | 2 | 2 | 2 | 2 |
| 10 | 24.03441 | 8  | 1 | 10   | 15   | 2 | 1 | 2 | 1 |
| 11 | 24.03441 | 5  | 1 | 13.3 | 24   | 2 | 2 | 1 | 1 |
| 12 | 27.11058 | 4  | 1 | 7.6  | 9    | 2 | 2 | 1 | 1 |
| 13 | 25.14861 | 3  | 2 | 6    | 8    | 2 | 2 | 2 | 2 |
| 14 | 28.76397 | 1  | 2 | 5    | 7    | 2 | 2 | 1 | 1 |
| 15 | 21.56455 | 1  | 2 | 6    | 8    | 2 | 2 | 2 | 1 |
| 16 | 23.87512 | 15 | 2 | 6    | 10   | 2 | 2 | 1 | 1 |
| 17 | 23.79536 | 2  | 1 | 4    | 9    | 2 | 2 | 2 | 1 |
| 18 | 26.95313 | 1  | 2 | 9.5  | 17   | 2 | 2 | 2 | 1 |
| 19 | 32.8125  | 12 | 1 | 7    | 4    | 2 | 2 | 2 | 1 |
| 20 | 22.3403  | 1  | 2 | 6    | 11   | 2 | 2 | 1 | 1 |
| 21 | 26.95313 | 10 | 1 | 14   | 22   | 2 | 2 | 1 | 1 |
| 22 | 22.26563 | 5  | 1 | 11   | 14   | 2 | 2 | 1 | 1 |
| 23 | 20.68515 | 11 | 2 | 6    | 7    | 2 | 2 | 1 | 2 |
| 24 | 28.04967 | 1  | 2 | 6    | 8    | 2 | 2 | 1 | 1 |
| 25 | 25.5367  | 15 | 1 | 17   | 30   | 2 | 2 | 1 | 1 |
| 26 | 26.7094  | 16 | 1 | 6    | 17   | 2 | 2 | 1 | 1 |
| 27 | 26.66667 | 20 | 1 | 8    | 16   | 2 | 2 | 1 | 1 |
| 28 | 23.22543 | 1  | 2 | 8    | 14   | 2 | 2 | 1 | 1 |
| 29 | 26.57313 | 1  | 2 | 7    | 16   | 2 | 2 | 1 | 1 |
| 30 | 22.03173 | 1  | 2 | 6    | 19.9 | 1 | 2 | 1 | 1 |
| 31 | 26.67276 | 3  | 2 | 8    | 14   | 2 | 2 | 2 | 1 |
| 32 | 30.07813 | 1  | 2 | 6    | 10   | 1 | 2 | 2 | 1 |
| 33 | 26.17188 | 4  | 2 | 5    | 9    | 2 | 2 | 1 | 1 |
| 34 | 25.68956 | 12 | 2 | 9    | 14   | 1 | 2 | 1 | 1 |
| 35 | 22.30815 | 3  | 2 | 12   | 19   | 1 | 2 | 2 | 1 |
| 36 | 24.50895 | 4  | 2 | 5    | 9    | 2 | 2 | 1 | 1 |
| 37 | 21.875   | 3  | 2 | 7    | 9    | 2 | 2 | 2 | 1 |
| 38 | 26.43807 | 3  | 2 | 7    | 10   | 2 | 2 | 2 | 1 |
| 39 | 26.17188 | 10 | 2 | 8    | 8    | 2 | 2 | 1 | 1 |
| 40 | 18.55288 | 22 | 2 | 9    | 12   | 2 | 2 | 1 | 2 |
| 41 | 25.39063 | 7  | 2 | 5    | 6    | 2 | 2 | 2 | 1 |
| 42 | 25.63117 | 14 | 2 | 6    | 13   | 1 | 1 | 1 | 1 |
| 43 | 25.03992 | 4  | 2 | 9    | 14   | 2 | 2 | 2 | 1 |
| 44 | 21.56455 | 3  | 2 | 6    | 7    | 2 | 2 | 1 | 1 |
| 45 | 21.19274 | 8  | 2 | 12   | 18   | 1 | 1 | 2 | 1 |
| 46 | 29.32099 | 10 | 2 | 7    | 9    | 2 | 2 | 2 | 1 |
| 47 | 26.83518 | 5  | 2 | 8    | 12   | 2 | 2 | 2 | 1 |
| 48 | 27.00513 | 8  | 1 | 14   | 21   | 1 | 2 | 2 | 1 |
| 49 | 25.40282 | 2  | 2 | 13   | 17   | 2 | 1 | 2 | 1 |
| 50 | 25.03992 | 15 | 2 | 7    | 10   | 2 | 2 | 2 | 1 |
| 51 | 23.8054  | 3  | 2 | 8.7  | 13.3 | 2 | 2 | 2 | 2 |

|    |          |    |   |      |      |   |   |   |   |
|----|----------|----|---|------|------|---|---|---|---|
| 1  |          |    |   |      |      |   |   |   |   |
| 2  | 24.03441 | 8  | 1 | 10   | 15   | 2 | 1 | 2 | 1 |
| 3  | 24.03441 | 5  | 1 | 13.3 | 24   | 2 | 2 | 1 | 1 |
| 4  | 27.11058 | 4  | 1 | 7.6  | 9    | 2 | 2 | 1 | 1 |
| 5  | 25.14861 | 3  | 2 | 6    | 8    | 2 | 2 | 2 | 2 |
| 6  | 28.76397 | 1  | 2 | 5    | 7    | 2 | 2 | 1 | 1 |
| 7  | 21.56455 | 1  | 2 | 6    | 8    | 2 | 2 | 2 | 1 |
| 8  | 23.87512 | 15 | 2 | 6    | 10   | 2 | 2 | 1 | 1 |
| 9  | 23.79536 | 2  | 1 | 4    | 8    | 2 | 2 | 2 | 1 |
| 10 | 26.95313 | 1  | 2 | 9.5  | 17   | 2 | 2 | 2 | 1 |
| 11 | 32.8125  | 12 | 1 | 7    | 9    | 2 | 2 | 2 | 1 |
| 12 | 24.03441 | 8  | 1 | 10   | 15   | 2 | 1 | 2 | 1 |
| 13 | 24.03441 | 5  | 1 | 13.3 | 24   | 2 | 2 | 1 | 1 |
| 14 | 27.11058 | 4  | 1 | 7.6  | 9    | 2 | 2 | 1 | 1 |
| 15 | 25.14861 | 3  | 2 | 6    | 8    | 2 | 2 | 2 | 2 |
| 16 | 28.76397 | 1  | 2 | 5    | 7    | 2 | 2 | 1 | 1 |
| 17 | 21.56455 | 1  | 2 | 6    | 8    | 2 | 2 | 2 | 1 |
| 18 | 23.87512 | 15 | 2 | 6    | 10   | 2 | 2 | 1 | 1 |
| 19 | 23.79536 | 2  | 1 | 4    | 5    | 2 | 2 | 2 | 1 |
| 20 | 26.95313 | 1  | 2 | 9.5  | 17   | 2 | 2 | 2 | 1 |
| 21 | 32.8125  | 12 | 2 | 7    | 4    | 2 | 2 | 2 | 1 |
| 22 | 22.3403  | 1  | 2 | 6    | 11   | 2 | 2 | 1 | 1 |
| 23 | 26.63892 | 4  | 1 | 10   | 18   | 2 | 1 | 1 | 1 |
| 24 | 32.88889 | 10 | 1 | 11   | 13   | 2 | 2 | 1 | 1 |
| 25 | 22.15102 | 3  | 2 | 9    | 13   | 2 | 2 | 1 | 1 |
| 26 | 23.29072 | 4  | 2 | 15   | 18   | 2 | 1 | 1 | 1 |
| 27 | 24.59491 | 10 | 2 | 10   | 11   | 2 | 1 | 1 | 1 |
| 28 | 30.29778 | 15 | 1 | 9    | 13   | 2 | 1 | 1 | 1 |
| 29 | 21.21832 | 4  | 1 | 10   | 18   | 2 | 1 | 1 | 1 |
| 30 | 30.22222 | 4  | 1 | 7    | 13   | 2 | 2 | 2 | 1 |
| 31 | 22.94213 | 3  | 2 | 9    | 13   | 2 | 2 | 1 | 1 |
| 32 | 32.08944 | 12 | 1 | 6    | 16   | 2 | 1 | 1 | 1 |
| 33 | 28.99931 | 10 | 2 | 4    | 10   | 2 | 2 | 2 | 1 |
| 34 | 27.97068 | 8  | 2 | 9    | 13   | 2 | 1 | 1 | 1 |
| 35 | 24.14152 | 4  | 1 | 10   | 18   | 2 | 1 | 1 | 1 |
| 36 | 29.33333 | 7  | 1 | 5    | 7    | 2 | 2 | 1 | 1 |
| 37 | 24.14152 | 6  | 2 | 7    | 12   | 2 | 2 | 1 | 1 |
| 38 | 23.29072 | 4  | 2 | 15   | 18   | 2 | 1 | 1 | 1 |
| 39 | 24.59491 | 10 | 2 | 10   | 11   | 2 | 1 | 1 | 1 |
| 40 | 25.33333 | 6  | 2 | 17.4 | 8.4  | 2 | 1 | 2 | 2 |
| 41 | 26.47918 | 5  | 2 | 11.8 | 14.5 | 2 | 2 | 2 | 2 |
| 42 | 30.29778 | 1  | 2 | 5.6  | 13   | 2 | 2 | 1 | 2 |
| 43 | 24.55775 | 5  | 2 | 7.9  | 9.1  | 2 | 2 | 1 | 1 |
| 44 | 29.27796 | 20 | 1 | 9.4  | 12.5 | 2 | 2 | 2 | 1 |
| 45 | 21.63115 | 3  | 1 | 9    | 11.2 | 2 | 2 | 2 | 1 |
| 46 | 23.8054  | 3  | 2 | 8.7  | 13.3 | 2 | 2 | 2 | 2 |
| 47 | 24.03441 | 8  | 1 | 10   | 15   | 2 | 1 | 2 | 1 |
| 48 | 27.82931 | 7  | 2 | 5    | 9    | 2 | 2 | 1 | 1 |
| 49 | 27.11058 | 4  | 1 | 7.6  | 9    | 2 | 2 | 1 | 1 |
| 50 | 25.14861 | 3  | 2 | 6    | 8    | 2 | 2 | 2 | 2 |
| 51 | 28.76397 | 1  | 2 | 5    | 7    | 2 | 2 | 1 | 1 |

|    |          |    |   |    |    |   |   |   |   |
|----|----------|----|---|----|----|---|---|---|---|
| 1  |          |    |   |    |    |   |   |   |   |
| 2  | 18.96193 | 15 | 1 | 6  | 8  | 2 | 2 | 2 | 1 |
| 3  | 27.40766 | 3  | 2 | 7  | 14 | 2 | 1 | 1 | 2 |
| 4  | 21.36752 | 1  | 2 | 7  | 8  | 1 | 2 | 1 | 1 |
| 5  | 24.60938 | 2  | 2 | 8  | 10 | 2 | 1 | 1 | 1 |
| 6  | 27.81588 | 3  | 1 | 8  | 16 | 2 | 1 | 1 | 1 |
| 7  | 26.04167 | 10 | 1 | 7  | 8  | 2 | 1 | 2 | 1 |
| 8  | 22.64087 | 4  | 2 | 8  | 16 | 2 | 2 | 2 | 1 |
| 9  | 25.39022 | 1  | 2 | 8  | 10 | 2 | 2 | 1 | 1 |
| 10 | 42.34405 | 6  | 1 | 7  | 9  | 2 | 2 | 1 | 1 |
| 11 | 24.65483 | 10 | 1 | 9  | 19 | 2 | 2 | 1 | 1 |
| 12 | 24.11265 | 2  | 2 | 7  | 8  | 2 | 2 | 2 | 1 |
| 13 | 24.24392 | 7  | 1 | 7  | 16 | 2 | 1 | 1 | 1 |
| 14 | 24.39482 | 5  | 2 | 6  | 10 | 2 | 2 | 2 | 1 |
| 15 | 27.23922 | 4  | 2 | 8  | 13 | 2 | 2 | 2 | 1 |
| 16 | 28.45293 | 6  | 2 | 6  | 11 | 2 | 2 | 2 | 1 |
| 17 | 26.04005 | 1  | 2 | 7  | 11 | 2 | 2 | 1 | 1 |
| 18 | 19.72387 | 6  | 2 | 14 | 17 | 2 | 2 | 2 | 2 |
| 19 | 26.52392 | 3  | 2 | 10 | 14 | 2 | 1 | 1 | 1 |
| 20 | 21.91381 | 6  | 1 | 11 | 16 | 2 | 2 | 2 | 1 |
| 21 | 24.24392 | 3  | 2 | 9  | 11 | 2 | 2 | 2 | 1 |
| 22 | 28.45293 | 14 | 1 | 6  | 9  | 2 | 1 | 2 | 1 |
| 23 | 28.3771  | 24 | 2 | 9  | 11 | 2 | 2 | 1 | 1 |
| 24 | 28.617   | 2  | 2 | 11 | 17 | 2 | 2 | 1 | 1 |
| 25 | 27.19179 | 6  | 2 | 7  | 11 | 2 | 2 | 2 | 2 |
| 26 | 25.87858 | 1  | 2 | 5  | 9  | 2 | 2 | 2 | 1 |
| 27 | 31.34645 | 1  | 2 | 13 | 23 | 2 | 2 | 2 | 1 |
| 28 | 34.72222 | 10 | 2 | 8  | 14 | 2 | 1 | 2 | 1 |
| 29 | 23.83301 | 14 | 2 | 7  | 11 | 2 | 2 | 1 | 1 |
| 30 | 29.89969 | 12 | 1 | 7  | 16 | 2 | 2 | 2 | 1 |
| 31 | 24.67702 | 11 | 1 | 6  | 12 | 1 | 2 | 2 | 1 |
| 32 | 29.27796 | 9  | 2 | 7  | 14 | 2 | 1 | 1 | 1 |
| 33 | 18.02596 | 1  | 2 | 7  | 8  | 1 | 2 | 1 | 1 |
| 34 | 25.1559  | 16 | 2 | 7  | 12 | 1 | 1 | 1 | 1 |
| 35 | 25.33333 | 1  | 2 | 7  | 8  | 2 | 2 | 1 | 1 |
| 36 | 23.82813 | 2  | 2 | 4  | 10 | 2 | 2 | 1 | 1 |
| 37 | 29.33333 | 1  | 2 | 12 | 20 | 2 | 2 | 1 | 1 |
| 38 | 23.33768 | 6  | 1 | 9  | 10 | 2 | 1 | 1 | 1 |
| 39 | 32.71862 | 5  | 1 | 9  | 11 | 2 | 2 | 1 | 1 |
| 40 | 22.60026 | 4  | 1 | 5  | 11 | 2 | 2 | 1 | 1 |
| 41 | 24.03461 | 2  | 2 | 5  | 10 | 2 | 2 | 1 | 1 |
| 42 | 24.03441 | 1  | 2 | 6  | 16 | 2 | 1 | 1 | 1 |
| 43 | 34.31953 | 1  | 1 | 7  | 8  | 2 | 2 | 1 | 1 |
| 44 | 28.67263 | 16 | 1 | 13 | 15 | 2 | 2 | 1 | 1 |
| 45 | 28.93519 | 8  | 1 | 11 | 14 | 2 | 2 | 1 | 1 |
| 46 | 32.31096 | 15 | 2 | 6  | 8  | 2 | 2 | 1 | 1 |
| 47 | 23.04688 | 18 | 1 | 9  | 11 | 2 | 2 | 2 | 1 |
| 48 | 24.22145 | 2  | 2 | 6  | 7  | 1 | 1 | 2 | 1 |
| 49 | 20.95717 | 1  | 2 | 7  | 8  | 2 | 2 | 2 | 1 |
| 50 | 23.62445 | 4  | 1 | 6  | 8  | 1 | 2 | 2 | 1 |
| 51 | 30.38194 | 10 | 2 | 5  | 9  | 2 | 2 | 2 | 1 |

|    |          |    |   |      |      |   |   |   |   |
|----|----------|----|---|------|------|---|---|---|---|
| 1  |          |    |   |      |      |   |   |   |   |
| 2  | 32.46753 | 2  | 2 | 5    | 9    | 2 | 2 | 2 | 1 |
| 3  | 18.36547 | 5  | 2 | 5.5  | 8    | 2 | 2 | 2 | 1 |
| 4  | 23.30668 | 10 | 1 | 13.4 | 20   | 2 | 2 | 2 | 1 |
| 5  | 23.87543 | 20 | 2 | 8    | 14   | 2 | 2 | 2 | 1 |
| 6  | 23.87512 | 1  | 1 | 7    | 11   | 2 | 2 | 2 | 1 |
| 7  | 24.91077 | 9  | 1 | 6    | 8    | 2 | 2 | 2 | 1 |
| 8  | 21.92613 | 7  | 1 | 7    | 9    | 2 | 2 | 2 | 1 |
| 9  | 37.10575 | 18 | 1 | 8    | 12   | 2 | 2 | 2 | 1 |
| 10 | 30.48338 | 5  | 2 | 5    | 7    | 2 | 2 | 2 | 1 |
| 11 | 25.87606 | 15 | 2 | 6    | 11   | 2 | 2 | 2 | 1 |
| 12 | 23.1911  | 17 | 1 | 8    | 11   | 2 | 2 | 2 | 2 |
| 13 | 31.55556 | 3  | 2 | 9    | 14   | 2 | 2 | 2 | 1 |
| 14 | 27.63037 | 20 | 1 | 8    | 11   | 2 | 2 | 2 | 1 |
| 15 | 24.14152 | 13 | 2 | 5    | 8    | 2 | 2 | 2 | 1 |
| 16 | 29.08163 | 1  | 2 | 7    | 8    | 2 | 1 | 2 | 1 |
| 17 | 32.46618 | 3  | 1 | 8    | 3    | 2 | 2 | 2 | 2 |
| 18 | 30.13148 | 10 | 2 | 11   | 18   | 2 | 1 | 2 | 2 |
| 19 | 34.24499 | 8  | 1 | 15   | 20   | 2 | 1 | 2 | 1 |
| 20 | 32.04995 | 3  | 2 | 6    | 8    | 2 | 2 | 2 | 1 |
| 21 | 27.88762 | 8  | 2 | 5    | 7    | 2 | 1 | 2 | 1 |
| 22 | 27.76621 | 8  | 1 | 14   | 17   | 2 | 2 | 1 | 1 |
| 23 | 22.22222 | 1  | 2 | 5    | 7.2  | 2 | 2 | 2 | 1 |
| 24 | 22.65625 | 3  | 2 | 8.1  | 11.3 | 2 | 2 | 2 | 1 |
| 25 | 27.88762 | 8  | 2 | 5    | 7    | 2 | 1 | 2 | 1 |
| 26 | 43.67106 | 13 | 1 | 7    | 9    | 2 | 2 | 2 | 1 |
| 27 | 30.29778 | 11 | 2 | 7    | 9    | 2 | 2 | 2 | 1 |
| 28 | 28.13366 | 8  | 2 | 5    | 10   | 2 | 2 | 2 | 2 |
| 29 | 24.14152 | 13 | 2 | 5    | 8    | 2 | 2 | 2 | 1 |
| 30 | 28.93519 | 20 | 1 | 6    | 13   | 2 | 2 | 2 | 1 |
| 31 | 29.4887  | 7  | 2 | 5    | 8    | 2 | 2 | 2 | 1 |
| 32 | 29.13632 | 25 | 1 | 9    | 12   | 2 | 2 | 2 | 1 |
| 33 | 23.8054  | 9  | 2 | 8    | 10   | 2 | 1 | 2 | 1 |
| 34 | 34.24499 | 8  | 1 | 15   | 20   | 2 | 1 | 2 | 1 |
| 35 | 30.08006 | 1  | 1 | 8    | 10   | 2 | 2 | 2 | 1 |
| 36 | 21.09619 | 2  | 2 | 6    | 8    | 2 | 2 | 2 | 1 |
| 37 | 23.8054  | 2  | 1 | 8    | 11   | 2 | 2 | 2 | 1 |
| 38 | 28.04038 | 30 | 1 | 11   | 20   | 2 | 2 | 1 | 1 |
| 39 | 25.22409 | 1  | 1 | 9    | 11   | 2 | 2 | 1 | 1 |
| 40 | 29.59184 | 10 | 1 | 8    | 10   | 2 | 1 | 2 | 1 |
| 41 | 26.03749 | 15 | 2 | 6    | 9    | 2 | 2 | 2 | 1 |
| 42 | 24.9135  | 22 | 1 | 14   | 15   | 2 | 2 | 2 | 1 |
| 43 | 26.12245 | 12 | 1 | 11   | 12   | 2 | 1 | 1 | 1 |
| 44 | 28.69898 | 8  | 2 | 6    | 8    | 1 | 2 | 1 | 1 |
| 45 | 22.03857 | 14 | 1 | 5    | 9    | 2 | 2 | 1 | 1 |
| 46 | 28.30385 | 7  | 2 | 6    | 7    | 2 | 2 | 1 | 1 |
| 47 | 24.60973 | 3  | 2 | 6    | 10   | 2 | 2 | 1 | 1 |
| 48 | 26.39798 | 1  | 2 | 4    | 8    | 1 | 2 | 2 | 1 |
| 49 | 24.9135  | 34 | 2 | 7    | 10   | 1 | 1 | 1 | 1 |
| 50 | 23.4375  | 21 | 1 | 9    | 13   | 2 | 2 | 2 | 1 |
| 51 | 22.26563 | 18 | 2 | 6    | 7    | 2 | 2 | 2 | 1 |

|    |          |    |   |     |      |   |   |   |   |
|----|----------|----|---|-----|------|---|---|---|---|
| 1  |          |    |   |     |      |   |   |   |   |
| 2  | 20.0796  | 10 | 1 | 6   | 8    | 2 | 2 | 2 | 1 |
| 3  | 24.34176 | 4  | 2 | 6.7 | 18   | 1 | 2 | 2 | 1 |
| 4  | 23.30668 | 3  | 1 | 6.1 | 4.7  | 2 | 1 | 2 | 1 |
| 5  | 27.23922 | 5  | 1 | 5.5 | 9.8  | 2 | 2 | 2 | 1 |
| 6  | 24.00549 | 1  | 2 | 5.7 | 7.3  | 2 | 2 | 2 | 1 |
| 7  | 22.51631 | 8  | 1 | 7.4 | 12.1 | 2 | 2 | 2 | 1 |
| 8  | 23.33768 | 4  | 2 | 6.1 | 4.7  | 1 | 2 | 1 | 1 |
| 9  | 27.91552 | 5  | 1 | 9.7 | 15.5 | 2 | 2 | 2 | 1 |
| 10 | 19.83471 | 8  | 2 | 6.7 | 4.7  | 2 | 2 | 1 | 1 |
| 11 | 27.25089 | 8  | 1 | 5.6 | 9    | 2 | 2 | 2 | 1 |
| 12 | 24.30462 | 3  | 1 | 8   | 6    | 2 | 2 | 2 | 1 |
| 13 | 26.31464 | 1  | 1 | 8   | 12.3 | 2 | 2 | 2 | 1 |
| 14 | 23.30905 | 12 | 2 | 8   | 14   | 2 | 2 | 2 | 1 |
| 15 | 27.30344 | 1  | 2 | 8.2 | 7    | 2 | 2 | 2 | 1 |
| 16 | 27.27633 | 4  | 2 | 4   | 7    | 2 | 2 | 2 | 1 |
| 17 | 27.05515 | 4  | 2 | 7   | 8    | 2 | 2 | 2 | 1 |
| 18 | 30.58802 | 1  | 2 | 12  | 10   | 2 | 2 | 2 | 1 |
| 19 | 23.8048  | 4  | 2 | 7   | 6    | 2 | 2 | 1 | 1 |
| 20 | 27.11111 | 3  | 2 | 7   | 9    | 2 | 2 | 2 | 1 |
| 21 | 24.23823 | 4  | 1 | 11  | 13   | 2 | 2 | 2 | 1 |
| 22 | 21.58003 | 4  | 2 | 8   | 11   | 2 | 2 | 2 | 1 |
| 23 | 31.86683 | 14 | 1 | 8   | 7    | 2 | 2 | 2 | 1 |
| 24 | 26.39798 | 22 | 2 | 6   | 11   | 2 | 2 | 2 | 1 |
| 25 | 26.40236 | 3  | 1 | 6   | 11.5 | 1 | 2 | 2 | 1 |
| 26 | 25.65437 | 15 | 1 | 11  | 7.3  | 2 | 2 | 2 | 1 |
| 27 | 21.21832 | 2  | 2 | 11  | 12   | 2 | 2 | 2 | 1 |
| 28 | 28.90625 | 19 | 2 | 5   | 8    | 2 | 2 | 2 | 1 |
| 29 | 33.59375 | 1  | 2 | 8   | 11.4 | 2 | 2 | 2 | 1 |
| 30 | 25.86451 | 15 | 2 | 8   | 12   | 2 | 2 | 1 | 1 |
| 31 | 25.78125 | 8  | 2 | 9   | 15   | 2 | 2 | 2 | 1 |
| 32 | 23.12467 | 8  | 2 | 5   | 18   | 2 | 2 | 1 | 1 |
| 33 | 22.21297 | 7  | 2 | 10  | 13   | 2 | 2 | 2 | 1 |
| 34 | 22.47659 | 13 | 2 | 5   | 7    | 2 | 1 | 2 | 1 |
| 35 | 25.71166 | 0  | 2 | 10  | 12   | 2 | 2 | 2 | 1 |
| 36 | 20.86112 | 20 | 1 | 7   | 18   | 1 | 2 | 2 | 1 |
| 37 | 22.83737 | 5  | 2 | 6   | 10   | 2 | 2 | 2 | 1 |
| 38 | 21.51386 | 6  | 2 | 7   | 10   | 2 | 2 | 2 | 1 |
| 39 | 25.63692 | 2  | 2 | 9   | 11   | 2 | 2 | 2 | 1 |
| 40 | 23.23346 | 3  | 1 | 5   | 9    | 2 | 2 | 2 | 1 |
| 41 | 23.73866 | 7  | 2 | 8   | 11   | 2 | 1 | 2 | 1 |
| 42 | 25.52965 | 12 | 2 | 7   | 12   | 1 | 2 | 2 | 1 |
| 43 | 30.42185 | 5  | 2 | 6   | 12   | 2 | 2 | 2 | 1 |
| 44 | 25       | 1  | 2 | 7   | 9    | 2 | 2 | 2 | 1 |
| 45 | 20.95717 | 11 | 1 | 12  | 11   | 1 | 2 | 2 | 1 |
| 46 | 27.6398  | 14 | 2 | 12  | 15   | 2 | 2 | 2 | 1 |
| 47 | 24.97399 | 13 | 2 | 9   | 20   | 2 | 2 | 2 | 1 |
| 48 | 29.40227 | 2  | 2 | 6   | 9    | 1 | 1 | 2 | 1 |
| 49 | 23.87512 | 11 | 1 | 6   | 9    | 2 | 2 | 2 | 1 |
| 50 | 20.79673 | 10 | 2 | 10  | 14   | 2 | 2 | 2 | 1 |
| 51 | 24.65483 | 5  | 1 | 9   | 10   | 2 | 2 | 2 | 1 |



|    |          |    |   |    |     |   |   |   |   |
|----|----------|----|---|----|-----|---|---|---|---|
| 1  |          |    |   |    |     |   |   |   |   |
| 2  | 24.44444 | 7  | 2 | 6  | 9   | 2 | 2 | 2 | 1 |
| 3  | 22.37034 | 4  | 2 | 6  | 7   | 2 | 1 | 2 | 1 |
| 4  | 22.0741  | 20 | 1 | 13 | 15  | 2 | 1 | 2 | 1 |
| 5  | 32       | 1  | 2 | 5  | 7   | 2 | 2 | 2 | 1 |
| 6  | 27.70526 | 2  | 2 | 5  | 9   | 2 | 1 | 2 | 1 |
| 7  | 25.07619 | 11 | 2 | 8  | 12  | 2 | 2 | 2 | 1 |
| 8  | 21.50447 | 2  | 1 | 5  | 7   | 2 | 1 | 2 | 1 |
| 9  | 23.45656 | 6  | 1 | 11 | 14  | 2 | 1 | 2 | 1 |
| 10 | 27.20961 | 11 | 2 | 7  | 9   | 2 | 2 | 2 | 1 |
| 11 | 29.51594 | 14 | 1 | 13 | 15  | 2 | 2 | 2 | 1 |
| 12 | 33.7477  | 3  | 1 | 13 | 14  | 2 | 2 | 2 | 1 |
| 13 | 32.7316  | 1  | 2 | 7  | 8   | 2 | 2 | 2 | 1 |
| 14 | 27.67874 | 9  | 1 | 7  | 8   | 2 | 2 | 2 | 1 |
| 15 | 23.06805 | 6  | 1 | 6  | 7   | 2 | 2 | 2 | 1 |
| 16 | 27.19179 | 10 | 1 | 12 | 11  | 2 | 1 | 2 | 1 |
| 17 | 26.77593 | 3  | 2 | 7  | 9   | 2 | 2 | 2 | 1 |
| 18 | 27.67874 | 3  | 2 | 11 | 12  | 2 | 2 | 2 | 1 |
| 19 | 20.8292  | 7  | 1 | 15 | 18  | 2 | 1 | 2 | 1 |
| 20 | 26.02264 | 9  | 1 | 8  | 11  | 2 | 1 | 2 | 1 |
| 21 | 27.11111 | 3  | 2 | 6  | 8   | 2 | 2 | 2 | 1 |
| 22 | 24.67105 | 6  | 2 | 9  | 11  | 2 | 2 | 2 | 1 |
| 23 | 24.19649 | 13 | 1 | 8  | 10  | 2 | 2 | 2 | 1 |
| 24 | 30.74787 | 3  | 2 | 9  | 11  | 2 | 2 | 2 | 1 |
| 25 | 30.63043 | 4  | 1 | 9  | 11  | 2 | 1 | 2 | 1 |
| 26 | 18.98659 | 10 | 1 | 12 | 16  | 2 | 1 | 2 | 1 |
| 27 | 24.14152 | 4  | 1 | 6  | 8   | 2 | 2 | 2 | 1 |
| 28 | 26.93572 | 15 | 1 | 18 | 20  | 2 | 2 | 2 | 1 |
| 29 | 33.22753 | 1  | 1 | 7  | 9   | 2 | 2 | 2 | 1 |
| 30 | 24.52682 | 9  | 1 | 8  | 14  | 2 | 2 | 2 | 1 |
| 31 | 45.88009 | 2  | 1 | 10 | 20  | 2 | 2 | 2 | 1 |
| 32 | 28.25097 | 12 | 1 | 5  | 8   | 2 | 2 | 2 | 1 |
| 33 | 33.69494 | 2  | 1 | 13 | 18  | 2 | 1 | 2 | 1 |
| 34 | 23.61275 | 6  | 1 | 6  | 12  | 2 | 2 | 2 | 1 |
| 35 | 17.25838 | 5  | 1 | 6  | 8   | 2 | 2 | 2 | 1 |
| 36 | 17.30104 | 1  | 2 | 11 | 18  | 2 | 2 | 2 | 1 |
| 37 | 32.83918 | 6  | 1 | 7  | 9   | 2 | 1 | 2 | 1 |
| 38 | 25.29938 | 9  | 1 | 8  | 14  | 2 | 2 | 2 | 1 |
| 39 | 32.31096 | 2  | 2 | 4  | 8   | 2 | 2 | 2 | 2 |
| 40 | 21.64127 | 2  | 2 | 7  | 9   | 2 | 2 | 2 | 1 |
| 41 | 21.58003 | 6  | 1 | 6  | 7   | 2 | 2 | 2 | 1 |
| 42 | 28.93519 | 4  | 1 | 7  | 8   | 2 | 2 | 2 | 1 |
| 43 | 27.27633 | 5  | 1 | 5  | 9   | 2 | 1 | 2 | 1 |
| 44 | 27.97068 | 5  | 1 | 7  | 9   | 2 | 1 | 2 | 1 |
| 45 | 26.91273 | 8  | 1 | 7  | 9   | 2 | 2 | 2 | 1 |
| 46 | 34.43526 | 2  | 1 | 7  | 9   | 2 | 2 | 2 | 1 |
| 47 | 28.13366 | 4  | 1 | 7  | 9   | 2 | 1 | 2 | 1 |
| 48 | 23.1911  | 1  | 1 | 7  | 8   | 2 | 2 | 2 | 1 |
| 49 | 26.27135 | 10 | 1 | 11 | 14  | 2 | 1 | 2 | 1 |
| 50 | 30.11028 | 14 | 2 | 7  | 6.5 | 2 | 2 | 2 | 1 |
| 51 | 29.26997 | 12 | 1 | 7  | 8   | 2 | 1 | 2 | 1 |

|    |          |    |   |      |      |   |   |   |   |
|----|----------|----|---|------|------|---|---|---|---|
| 1  |          |    |   |      |      |   |   |   |   |
| 2  | 32.45472 | 1  | 1 | 7    | 9    | 2 | 2 | 2 | 1 |
| 3  | 30.80125 | 9  | 2 | 8    | 11.1 | 2 | 1 | 2 | 1 |
| 4  | 27.55556 | 1  | 2 | 6.3  | 9.8  | 2 | 2 | 2 | 1 |
| 5  | 31.29737 | 16 | 1 | 11.8 | 13.1 | 2 | 1 | 2 | 1 |
| 6  | 25.45236 | 12 | 1 | 9.1  | 11.8 | 2 | 1 | 2 | 1 |
| 7  | 26.3779  | 4  | 2 | 5.2  | 8.1  | 2 | 1 | 2 | 1 |
| 8  | 35.7072  | 1  | 2 | 8.5  | 9    | 2 | 1 | 2 | 1 |
| 9  | 23.47303 | 5  | 1 | 9.2  | 10   | 2 | 2 | 2 | 1 |
| 10 | 30.73061 | 2  | 2 | 5.2  | 7.8  | 2 | 2 | 2 | 1 |
| 11 | 28.30385 | 1  | 1 | 6    | 7.2  | 2 | 2 | 2 | 1 |
| 12 | 26.22269 | 1  | 2 | 4.7  | 5.9  | 2 | 2 | 2 | 1 |
| 13 | 34.69686 | 1  | 2 | 4.7  | 6.8  | 2 | 1 | 2 | 1 |
| 14 | 29.03179 | 9  | 1 | 6.8  | 9.8  | 2 | 2 | 2 | 1 |
| 15 | 23.6304  | 8  | 2 | 6.5  | 12.1 | 2 | 2 | 2 | 1 |
| 16 | 29.43213 | 6  | 2 | 12.7 | 17.7 | 2 | 2 | 2 | 1 |
| 17 | 20.2395  | 1  | 1 | 6.4  | 11.4 | 2 | 2 | 2 | 1 |
| 18 | 23.49524 | 9  | 1 | 6.8  | 9.1  | 2 | 2 | 2 | 1 |
| 19 | 27.39226 | 1  | 2 | 3.1  | 8.8  | 2 | 2 | 2 | 1 |
| 20 | 27.76621 | 2  | 1 | 11.6 | 19   | 2 | 2 | 2 | 1 |
| 21 | 16.97601 | 1  | 2 | 4.2  | 6.3  | 2 | 2 | 2 | 1 |
| 22 | 24       | 5  | 2 | 6.8  | 9.3  | 2 | 2 | 2 | 1 |
| 23 | 22.89282 | 1  | 1 | 7.9  | 16.3 | 2 | 2 | 2 | 1 |
| 24 | 21.77778 | 10 | 1 | 15.2 | 22.4 | 2 | 2 | 2 | 2 |
| 25 | 22.0741  | 5  | 1 | 10.4 | 18.1 | 2 | 1 | 2 | 1 |
| 26 | 29.90303 | 5  | 2 | 6.1  | 7.9  | 2 | 1 | 2 | 1 |
| 27 | 26.75321 | 18 | 1 | 6.8  | 10.3 | 2 | 2 | 2 | 1 |
| 28 | 23.8048  | 2  | 1 | 6.8  | 7.9  | 2 | 2 | 2 | 1 |
| 29 | 28.53746 | 10 | 2 | 6.3  | 8.3  | 2 | 2 | 2 | 1 |
| 30 | 19.97622 | 6  | 2 | 12.2 | 14.2 | 2 | 1 | 2 | 1 |
| 31 | 33.70052 | 11 | 2 | 5.4  | 7    | 2 | 2 | 2 | 1 |
| 32 | 23.42237 | 13 | 2 | 6.4  | 7.7  | 2 | 2 | 2 | 1 |
| 33 | 25.65263 | 5  | 2 | 7.5  | 8.5  | 2 | 2 | 2 | 1 |
| 34 | 34.70776 | 1  | 2 | 10.8 | 16.1 | 2 | 2 | 2 | 1 |
| 35 | 23.2446  | 4  | 1 | 5    | 7.3  | 2 | 1 | 2 | 1 |
| 36 | 17.85714 | 6  | 1 | 16.6 | 18.2 | 2 | 2 | 2 | 1 |
| 37 | 27.58621 | 18 | 2 | 6    | 12.9 | 2 | 1 | 2 | 1 |
| 38 | 21.58003 | 3  | 1 | 6.2  | 16.2 | 2 | 2 | 2 | 2 |
| 39 | 27.11058 | 9  | 2 | 10.7 | 13.2 | 2 | 2 | 2 | 1 |
| 40 | 17.30104 | 11 | 1 | 6.7  | 9.3  | 2 | 1 | 2 | 1 |
| 41 | 27.47138 | 3  | 2 | 11   | 14   | 2 | 2 | 2 | 1 |
| 42 | 29.96878 | 4  | 1 | 7.2  | 11.2 | 2 | 2 | 2 | 2 |
| 43 | 26.84067 | 6  | 2 | 5    | 9.2  | 2 | 2 | 2 | 1 |
| 44 | 22.22222 | 5  | 2 | 6.4  | 9    | 2 | 2 | 2 | 1 |
| 45 | 27.05515 | 6  | 1 | 5.3  | 8    | 2 | 2 | 1 | 1 |
| 46 | 27.76621 | 1  | 1 | 5.7  | 8.9  | 2 | 2 | 1 | 1 |
| 47 | 21.70139 | 15 | 2 | 1.2  | 3.6  | 2 | 2 | 2 | 1 |
| 48 | 23.18339 | 6  | 2 | 9.5  | 11.3 | 2 | 2 | 2 | 2 |
| 49 | 26.67276 | 8  | 1 | 6    | 8.5  | 2 | 2 | 2 | 1 |
| 50 | 25.10957 | 5  | 1 | 9.8  | 12.1 | 2 | 2 | 2 | 1 |
| 51 | 22.49135 | 5  | 1 | 13.2 | 17.3 | 2 | 2 | 2 | 1 |

|    |          |     |   |       |      |   |   |   |   |
|----|----------|-----|---|-------|------|---|---|---|---|
| 1  |          |     |   |       |      |   |   |   |   |
| 2  | 24.12175 | 12  | 2 | 9.6   | 16.8 | 1 | 2 | 2 | 1 |
| 3  | 22.52151 | 1   | 2 | 5.6   | 8.5  | 2 | 2 | 1 | 1 |
| 4  | 31.99217 | 6   | 1 | 5     | 10   | 2 | 1 | 2 | 1 |
| 5  | 32.83918 | 3   | 2 | 4     | 8    | 2 | 2 | 2 | 1 |
| 6  | 22.82688 | 2   | 2 | 14    | 18   | 2 | 1 | 1 | 1 |
| 7  | 24.44444 | 6   | 2 | 6     | 8    | 2 | 2 | 1 | 2 |
| 8  | 23.45656 | 3   | 2 | 5     | 8    | 2 | 2 | 2 | 2 |
| 9  | 25.33333 | 3   | 2 | 10    | 22   | 2 | 1 | 2 | 1 |
| 10 | 24.44444 | 1   | 2 | 6.5   | 9    | 2 | 1 | 1 | 1 |
| 11 | 20.76125 | 10  | 1 | 11    | 13   | 1 | 1 | 1 | 1 |
| 12 | 23.14815 | 3   | 1 | 11    | 14   | 2 | 2 | 1 | 1 |
| 13 | 24.34176 | 2.5 | 2 | 6.6   | 7.4  | 2 | 2 | 2 | 1 |
| 14 | 22.22222 | 12  | 2 | 8.5   | 11.3 | 2 | 2 | 1 | 1 |
| 15 | 24.45107 | 10  | 2 | 7     | 10   | 2 | 1 | 1 | 1 |
| 16 | 22.82688 | 3   | 2 | 6     | 7    | 2 | 2 | 2 | 1 |
| 17 | 21.45727 | 5   | 1 | 6     | 5    | 2 | 2 | 2 | 1 |
| 18 | 26.89618 | 3   | 2 | 8     | 9    | 2 | 2 | 2 | 1 |
| 19 | 27.05515 | 10  | 2 | 4.5   | 8    | 2 | 2 | 2 | 1 |
| 20 | 23.49524 | 2   | 2 | 14    | 17   | 2 | 2 | 1 | 1 |
| 21 | 27.02581 | 4   | 2 | 8     | 14   | 2 | 2 | 2 | 1 |
| 22 | 25.5102  | 4   | 2 | 7     | 11   | 2 | 2 | 2 | 1 |
| 23 | 28.80441 | 3   | 1 | 10.11 | 18.1 | 2 | 2 | 2 | 1 |
| 24 | 31.95763 | 3   | 1 | 4     | 8    | 2 | 2 | 2 | 2 |
| 25 | 24.79667 | 6   | 2 | 8     | 12   | 2 | 2 | 1 | 1 |
| 26 | 20.81165 | 5   | 2 | 9     | 13   | 2 | 2 | 2 | 1 |
| 27 | 22.21368 | 5   | 2 | 4     | 6    | 2 | 2 | 2 | 1 |
| 28 | 19.29012 | 2   | 2 | 8     | 11   | 2 | 1 | 1 | 1 |
| 29 | 26.31464 | 2   | 1 | 12.6  | 15   | 2 | 2 | 2 | 2 |
| 30 | 18.76525 | 1   | 2 | 7.5   | 7.6  | 2 | 2 | 2 | 1 |
| 31 | 30.70041 | 6   | 2 | 5     | 10   | 2 | 2 | 1 | 1 |
| 32 | 25.33333 | 7   | 2 | 3.5   | 5.1  | 2 | 2 | 2 | 1 |
| 33 | 23.22543 | 8   | 1 | 4.8   | 16.8 | 2 | 2 | 2 | 1 |
| 34 | 22.22222 | 1   | 2 | 6.5   | 8.4  | 2 | 2 | 2 | 1 |
| 35 | 25.91068 | 3   | 2 | 5.4   | 8.9  | 2 | 2 | 2 | 1 |
| 36 | 24.80159 | 2   | 2 | 6     | 8.4  | 2 | 2 | 2 | 1 |
| 37 | 19.81768 | 2   | 2 | 8     | 13   | 2 | 2 | 2 | 1 |
| 38 | 19.39619 | 12  | 2 | 5.7   | 15   | 2 | 2 | 2 | 1 |
| 39 | 23.72529 | 4   | 2 | 5.1   | 7.4  | 2 | 2 | 2 | 1 |
| 40 | 25.39063 | 2   | 1 | 8     | 10   | 2 | 2 | 2 | 2 |
| 41 | 20.81165 | 3   | 1 | 9     | 11   | 2 | 1 | 2 | 1 |
| 42 | 18.64534 | 6   | 1 | 8     | 11   | 2 | 2 | 2 | 1 |
| 43 | 23.4375  | 2   | 2 | 6     | 8    | 2 | 2 | 2 | 1 |
| 44 | 25.88757 | 4   | 2 | 9     | 10   | 2 | 2 | 1 | 1 |
| 45 | 25.96953 | 5   | 1 | 10    | 13   | 2 | 2 | 2 | 1 |
| 46 | 21.22789 | 5   | 2 | 9     | 11   | 1 | 2 | 1 | 2 |
| 47 | 38.04994 | 4   | 2 | 11    | 14   | 2 | 2 | 2 | 2 |
| 48 | 27.68166 | 8   | 2 | 10    | 13   | 2 | 1 | 1 | 2 |
| 49 | 23.4375  | 1   | 2 | 8     | 11   | 2 | 2 | 1 | 1 |
| 50 | 28       | 8   | 2 | 5     | 8    | 2 | 2 | 2 | 1 |
| 51 | 19.05197 | 10  | 1 | 9     | 11   | 2 | 2 | 2 | 1 |

|    |          |    |   |       |       |   |   |   |   |
|----|----------|----|---|-------|-------|---|---|---|---|
| 1  |          |    |   |       |       |   |   |   |   |
| 2  | 27.34375 | 2  | 1 | 9     | 11    | 1 | 2 | 2 | 1 |
| 3  | 21.95248 | 5  | 1 | 6     | 11    | 2 | 2 | 2 | 1 |
| 4  | 20.81165 | 3  | 1 | 5     | 9     | 2 | 2 | 2 | 1 |
| 5  | 24.22145 | 1  | 2 | 6     | 8     | 2 | 2 | 2 | 1 |
| 6  |          |    |   |       |       |   |   |   |   |
| 7  | 19.53125 | 10 | 1 | 10    | 14    | 2 | 1 | 2 | 1 |
| 8  | 24.21875 | 3  | 2 | 10    | 14    | 2 | 2 | 2 | 1 |
| 9  | 22.89282 | 1  | 2 | 5     | 6     | 2 | 2 | 2 | 1 |
| 10 | 21.56455 | 8  | 2 | 8     | 12    | 2 | 2 | 2 | 1 |
| 11 | 35.20955 | 1  | 2 | 9     | 10    | 2 | 2 | 2 | 1 |
| 12 |          |    |   |       |       |   |   |   |   |
| 13 | 31.11111 | 12 | 2 | 12    | 16    | 2 | 2 | 2 | 1 |
| 14 | 22.86237 | 1  | 1 | 11    | 14    | 2 | 2 | 2 | 1 |
| 15 | 30.22222 | 6  | 2 | 4     | 7     | 2 | 2 | 2 | 1 |
| 16 | 31.21748 | 4  | 2 | 6     | 9     | 2 | 1 | 2 | 1 |
| 17 | 21.7502  | 8  | 2 | 10    | 13    | 2 | 2 | 2 | 1 |
| 18 | 22.86237 | 6  | 2 | 5     | 7     | 2 | 2 | 2 | 1 |
| 19 |          |    |   |       |       |   |   |   |   |
| 20 | 23.58833 | 10 | 2 | 12    | 14    | 2 | 1 | 2 | 1 |
| 21 | 32.79321 | 7  | 2 | 7     | 10    | 2 | 2 | 2 | 2 |
| 22 | 20       | 10 | 2 | 6.3   | 9     | 2 | 2 | 2 | 2 |
| 23 |          |    |   |       |       |   |   |   |   |
| 24 | 28.14787 | 4  | 2 | 11    | 15.8  | 2 | 2 | 2 | 2 |
| 25 | 31.11111 | 20 | 2 | 6     | 7     | 2 | 2 | 2 | 1 |
| 26 | 22.22222 | 7  | 2 | 10    | 9     | 2 | 2 | 2 | 1 |
| 27 | 31.46837 | 1  | 2 | 5     | 9     | 2 | 2 | 2 | 1 |
| 28 | 30.61225 | 14 | 2 | 8     | 10    | 2 | 2 | 1 | 1 |
| 29 | 25.56611 | 8  | 2 | 6     | 8     | 2 | 2 | 2 | 2 |
| 30 | 33.21799 | 8  | 1 | 18    | 21    | 2 | 2 | 2 | 2 |
| 31 | 24.12175 | 7  | 1 | 5     | 7     | 2 | 2 | 1 | 1 |
| 32 | 24.97704 | 5  | 1 | 25    | 27    | 2 | 2 | 1 | 1 |
| 33 | 28.88889 | 10 | 1 | 8     | 9     | 2 | 2 | 2 | 1 |
| 34 | 21.30395 | 8  | 2 | 7     | 9     | 2 | 2 | 1 | 1 |
| 35 | 21.22281 | 20 | 2 | 9     | 7     | 2 | 2 | 2 | 1 |
| 36 | 30.10212 | 16 | 1 | 7     | 12    | 2 | 2 | 2 | 1 |
| 37 | 29.29688 | 1  | 2 | 6     | 8     | 2 | 2 | 1 | 1 |
| 38 | 23.38869 | 3  | 2 | 10    | 13    | 2 | 2 | 2 | 1 |
| 39 | 29.26007 | 1  | 1 | 5     | 7     | 2 | 2 | 1 | 1 |
| 40 | 27.84585 | 20 | 2 | 9     | 11    | 2 | 2 | 1 | 1 |
| 41 | 25.10957 | 5  | 2 | 3     | 13    | 2 | 2 | 2 | 1 |
| 42 | 26.7094  | 10 | 1 | 6     | 9     | 2 | 2 | 2 | 1 |
| 43 | 23.18339 | 7  | 1 | 8     | 17    | 2 | 2 | 2 | 2 |
| 44 | 28.57796 | 2  | 1 | 13    | 16    | 2 | 2 | 1 | 1 |
| 45 | 27.11111 | 15 | 1 | 7     | 9     | 2 | 1 | 1 | 1 |
| 46 | 28.76397 | 8  | 2 | 6     | 9     | 2 | 2 | 2 | 1 |
| 47 | 27.26801 | 3  | 2 | 15.6  | 17.83 | 2 | 2 | 2 | 1 |
| 48 | 22.34778 | 8  | 1 | 15.1  | 17.66 | 2 | 1 | 2 | 1 |
| 49 | 31.16344 | 4  | 1 | 6.3   | 9.6   | 2 | 2 | 1 | 1 |
| 50 | 22.47659 | 3  | 1 | 11.9  | 13.4  | 1 | 2 | 2 | 1 |
| 51 | 18.66667 | 10 | 1 | 18.74 | 21.94 | 2 | 2 | 1 | 2 |
| 52 | 21.64127 | 1  | 1 | 6.9   | 9.3   | 2 | 1 | 2 | 1 |
| 53 | 21.33333 | 1  | 2 | 6     | 7.8   | 2 | 2 | 1 | 1 |
| 54 | 20.45184 | 1  | 1 | 5.05  | 9.55  | 2 | 2 | 1 | 2 |
| 55 | 24.88889 | 3  | 1 | 13.6  | 25.66 | 2 | 1 | 1 | 2 |

|    |          |    |   |      |       |   |   |   |   |
|----|----------|----|---|------|-------|---|---|---|---|
| 1  |          |    |   |      |       |   |   |   |   |
| 2  | 20.77562 | 3  | 1 | 6.3  | 7.6   | 1 | 1 | 2 | 1 |
| 3  | 19.47715 | 4  | 2 | 11.6 | 22.2  | 2 | 2 | 2 | 1 |
| 4  | 22.89282 | 1  | 2 | 8.22 | 15    | 2 | 2 | 1 | 1 |
| 5  | 22.26563 | 7  | 1 | 8.9  | 11.27 | 2 | 1 | 1 | 1 |
| 6  | 26.93572 | 5  | 1 | 8.9  | 10.1  | 2 | 2 | 2 | 1 |
| 7  | 20.19509 | 1  | 1 | 5.3  | 7     | 2 | 2 | 2 | 1 |
| 8  | 21.09619 | 9  | 1 | 11   | 19    | 2 | 2 | 2 | 1 |
| 9  | 20.50493 | 12 | 1 | 9    | 14    | 2 | 1 | 2 | 1 |
| 10 | 27.81588 | 2  | 1 | 6    | 17    | 2 | 2 | 2 | 1 |
| 11 | 19.90997 | 15 | 1 | 14   | 18    | 2 | 1 | 1 | 1 |
| 12 | 24.52682 | 5  | 1 | 6    | 9     | 2 | 2 | 2 | 1 |
| 13 | 24.38653 | 7  | 2 | 15   | 22    | 2 | 2 | 2 | 1 |
| 14 | 19.29012 | 7  | 2 | 8    | 16    | 2 | 2 | 2 | 1 |
| 15 | 22.22222 | 12 | 1 | 13   | 21    | 2 | 2 | 2 | 2 |
| 16 | 22.82996 | 3  | 2 | 11   | 17    | 2 | 1 | 2 | 1 |
| 17 | 23.55556 | 6  | 2 | 5    | 7     | 2 | 2 | 2 | 1 |
| 18 | 22.64087 | 10 | 2 | 6    | 9     | 2 | 1 | 2 | 1 |
| 19 | 22.58271 | 3  | 1 | 17   | 21    | 2 | 1 | 1 | 1 |
| 20 | 14.0625  | 20 | 1 | 9    | 14    | 2 | 2 | 2 | 1 |
| 21 | 18.5178  | 7  | 2 | 11   | 22    | 1 | 2 | 2 | 1 |
| 22 | 26.29172 | 3  | 1 | 6    | 10    | 2 | 2 | 2 | 1 |
| 23 | 21.30395 | 4  | 2 | 14   | 21    | 2 | 2 | 1 | 1 |
| 24 | 15.05514 | 12 | 2 | 6    | 8     | 2 | 2 | 1 | 1 |
| 25 | 21.77384 | 14 | 1 | 8    | 15    | 2 | 2 | 1 | 1 |
| 26 | 43.80165 | 8  | 1 | 7    | 9     | 1 | 2 | 1 | 1 |
| 27 | 25.5102  | 15 | 1 | 13   | 16    | 1 | 1 | 2 | 1 |
| 28 | 21.64127 | 10 | 1 | 9    | 14    | 1 | 2 | 2 | 1 |
| 29 | 17.00882 | 1  | 2 | 6    | 10    | 2 | 2 | 2 | 1 |
| 30 | 24.76757 | 2  | 2 | 8    | 9     | 1 | 1 | 2 | 1 |
| 31 | 22.86237 | 13 | 2 | 16   | 24    | 2 | 2 | 2 | 1 |
| 32 | 19.84127 | 1  | 1 | 8    | 13    | 2 | 2 | 2 | 1 |
| 33 | 19.22769 | 9  | 1 | 8    | 15    | 1 | 1 | 2 | 1 |
| 34 | 22.26563 | 2  | 1 | 6    | 7     | 2 | 1 | 2 | 1 |
| 35 | 20.50493 | 11 | 2 | 9    | 15    | 1 | 2 | 2 | 2 |
| 36 | 23.1911  | 3  | 1 | 6    | 7     | 1 | 1 | 2 | 1 |
| 37 | 23.4375  | 1  | 2 | 6    | 7     | 2 | 1 | 2 | 1 |
| 38 | 20.93664 | 2  | 2 | 6    | 8     | 2 | 2 | 2 | 1 |
| 39 | 16.44737 | 8  | 1 | 18   | 20    | 2 | 2 | 2 | 1 |
| 40 | 21.50189 | 1  | 1 | 19   | 28    | 2 | 2 | 1 | 1 |
| 41 | 20.0796  | 1  | 1 | 17   | 26    | 1 | 2 | 2 | 1 |
| 42 | 22.31328 | 5  | 2 | 6    | 8     | 2 | 2 | 1 | 1 |
| 43 | 20.28123 | 18 | 1 | 14   | 22    | 2 | 2 | 2 | 1 |
| 44 | 21.23057 | 19 | 1 | 6    | 13    | 2 | 2 | 1 | 1 |
| 45 | 20.95717 | 24 | 2 | 12   | 17    | 2 | 1 | 1 | 1 |
| 46 | 24.34176 | 15 | 1 | 5    | 8     | 2 | 2 | 1 | 1 |
| 47 | 21.33821 | 30 | 1 | 6    | 9     | 2 | 2 | 2 | 1 |
| 48 | 22.37568 | 3  | 2 | 9    | 14    | 2 | 2 | 2 | 1 |
| 49 | 22.18935 | 12 | 1 | 7    | 9     | 2 | 2 | 2 | 1 |
| 50 | 21.71925 | 18 | 1 | 6    | 10    | 2 | 2 | 1 | 2 |
| 51 | 20.54569 | 10 | 1 | 5    | 8     | 2 | 1 | 2 | 1 |

|    |          |    |   |     |      |   |   |   |   |
|----|----------|----|---|-----|------|---|---|---|---|
| 1  |          |    |   |     |      |   |   |   |   |
| 2  | 24.38653 | 16 | 1 | 9   | 13   | 2 | 1 | 2 | 1 |
| 3  | 29.06977 | 12 | 1 | 16  | 19   | 2 | 2 | 2 | 1 |
| 4  | 29.06977 | 12 | 1 | 16  | 19   | 2 | 2 | 2 | 1 |
| 5  | 21.875   | 8  | 2 | 12  | 20   | 2 | 2 | 2 | 2 |
| 6  | 30.86304 | 9  | 1 | 6   | 8    | 2 | 1 | 1 | 1 |
| 7  | 26.02758 | 2  | 2 | 5.4 | 8.1  | 2 | 1 | 2 | 1 |
| 8  | 21.22789 | 36 | 2 | 5.8 | 7.9  | 1 | 2 | 2 | 1 |
| 9  | 20.95717 | 24 | 2 | 12  | 17   | 2 | 1 | 1 | 1 |
| 10 | 21.00767 | 3  | 1 | 6.4 | 8    | 1 | 2 | 2 | 1 |
| 11 | 24.09297 | 5  | 2 | 7   | 22   | 1 | 1 | 1 | 1 |
| 12 | 27.47624 | 10 | 1 | 9   | 12   | 2 | 2 | 2 | 1 |
| 13 | 23.73866 | 8  | 1 | 7   | 10   | 1 | 2 | 1 | 2 |
| 14 | 28.959   | 4  | 1 | 7   | 13   | 2 | 2 | 2 | 1 |
| 15 | 25.96454 | 9  | 1 | 10  | 17   | 2 | 1 | 2 | 1 |
| 16 | 22.26563 | 2  | 2 | 6   | 7    | 1 | 1 | 1 | 1 |
| 17 | 24.30462 | 10 | 1 | 7.9 | 19   | 2 | 2 | 2 | 1 |
| 18 | 18.55956 | 12 | 1 | 7   | 10   | 2 | 2 | 2 | 1 |
| 19 | 24.67702 | 15 | 1 | 7   | 9    | 2 | 1 | 2 | 1 |
| 20 | 15.94388 | 12 | 1 | 9   | 22   | 2 | 1 | 2 | 1 |
| 21 | 22.83737 | 5  | 1 | 7   | 9    | 2 | 1 | 2 | 2 |
| 22 | 19.69267 | 12 | 1 | 9   | 14   | 2 | 2 | 2 | 2 |
| 23 | 23.33768 | 10 | 1 | 11  | 14   | 2 | 1 | 2 | 1 |
| 24 | 22.49135 | 10 | 2 | 8.4 | 9    | 2 | 1 | 2 | 1 |
| 25 | 19.53125 | 5  | 2 | 9   | 12   | 1 | 2 | 2 | 1 |
| 26 | 21.93635 | 12 | 1 | 11  | 12   | 2 | 2 | 2 | 1 |
| 27 | 18.30577 | 16 | 1 | 8   | 12   | 2 | 1 | 2 | 1 |
| 28 | 29.72108 | 15 | 1 | 8   | 10   | 2 | 1 | 1 | 1 |
| 29 | 25.34435 | 8  | 2 | 24  | 11   | 2 | 1 | 2 | 1 |
| 30 | 17.71542 | 1  | 1 | 7   | 28   | 2 | 1 | 2 | 2 |
| 31 | 21.19274 | 2  | 1 | 12  | 17   | 1 | 1 | 2 | 1 |
| 32 | 26.17188 | 2  | 2 | 8   | 9    | 2 | 1 | 2 | 1 |
| 33 | 20.54569 | 20 | 1 | 8   | 10   | 2 | 2 | 1 | 2 |
| 34 | 21.33333 | 7  | 1 | 15  | 24   | 2 | 1 | 2 | 1 |
| 35 | 23.45856 | 10 | 1 | 15  | 30   | 2 | 2 | 2 | 1 |
| 36 | 19.39619 | 9  | 1 | 24  | 28   | 2 | 1 | 2 | 2 |
| 37 | 17.1875  | 20 | 2 | 6   | 8    | 2 | 2 | 2 | 1 |
| 38 | 29.7442  | 1  | 2 | 7   | 8    | 2 | 1 | 2 | 1 |
| 39 | 21.67126 | 22 | 1 | 10  | 16   | 2 | 2 | 2 | 1 |
| 40 | 29.05475 | 15 | 2 | 13  | 21   | 2 | 1 | 2 | 1 |
| 41 | 21.38394 | 15 | 1 | 8   | 10   | 2 | 2 | 2 | 1 |
| 42 | 23.56663 | 3  | 1 | 10  | 14   | 2 | 2 | 2 | 1 |
| 43 | 22.60026 | 17 | 1 | 12  | 14   | 2 | 2 | 2 | 1 |
| 44 | 24.38272 | 10 | 1 | 6   | 13   | 2 | 1 | 2 | 2 |
| 45 | 25.07619 | 12 | 1 | 10  | 19   | 2 | 1 | 2 | 1 |
| 46 | 25.95156 | 3  | 1 | 7.3 | 8.14 | 2 | 2 | 2 | 2 |
| 47 | 26.23356 | 7  | 1 | 11  | 12   | 2 | 2 | 2 | 1 |
| 48 | 19.05197 | 6  | 2 | 7   | 9    | 2 | 1 | 2 | 1 |
| 49 | 22.47659 | 10 | 2 | 7   | 11   | 2 | 1 | 2 | 1 |
| 50 | 22.67995 | 3  | 1 | 8   | 9    | 2 | 2 | 2 | 1 |
| 51 | 22.86237 | 7  | 1 | 9   | 11   | 2 | 2 | 2 | 1 |

|    |          |    |   |      |      |   |   |   |   |
|----|----------|----|---|------|------|---|---|---|---|
| 1  |          |    |   |      |      |   |   |   |   |
| 2  | 20.77562 | 2  | 2 | 10   | 17   | 2 | 1 | 2 | 1 |
| 3  | 23.78121 | 4  | 2 | 6    | 8    | 2 | 2 | 1 | 2 |
| 4  | 22.5183  | 20 | 2 | 7    | 10   | 2 | 2 | 2 | 1 |
| 5  | 22.98401 | 3  | 1 | 6    | 8    | 2 | 2 | 2 | 1 |
| 6  | 18.59104 | 5  | 1 | 9    | 17   | 2 | 2 | 2 | 1 |
| 7  | 24.7768  | 10 | 2 | 6    | 24   | 2 | 1 | 2 | 1 |
| 8  | 26.47918 | 9  | 1 | 6.7  | 8.3  | 2 | 1 | 2 | 2 |
| 9  | 25.14861 | 6  | 2 | 7.9  | 10.8 | 2 | 2 | 1 | 2 |
| 10 | 25.96953 | 5  | 1 | 9.8  | 17   | 2 | 2 | 2 | 2 |
| 11 | 46.23725 | 12 | 1 | 9.7  | 11.5 | 2 | 2 | 2 | 1 |
| 12 | 27.40766 | 3  | 2 | 6    | 8.5  | 2 | 2 | 2 | 1 |
| 13 | 23.8054  | 4  | 1 | 8.9  | 14.9 | 2 | 2 | 2 | 1 |
| 14 | 18.08021 | 7  | 1 | 6.4  | 7.5  | 2 | 2 | 2 | 1 |
| 15 | 32.14286 | 2  | 1 | 11.6 | 14.6 | 2 | 1 | 2 | 1 |
| 16 | 23.33768 | 6  | 2 | 13.7 | 14.4 | 2 | 2 | 2 | 1 |
| 17 | 24.21875 | 3  | 2 | 6.6  | 24   | 2 | 2 | 2 | 1 |
| 18 | 26.14269 | 14 | 2 | 9.3  | 12.6 | 2 | 1 | 2 | 1 |
| 19 | 33.77045 | 1  | 2 | 13.7 | 24   | 2 | 1 | 2 | 1 |
| 20 | 25.78125 | 15 | 1 | 14.8 | 17.9 | 2 | 2 | 2 | 1 |
| 21 | 21.70139 | 1  | 1 | 3.6  | 8.8  | 2 | 2 | 2 | 2 |
| 22 | 26.67276 | 8  | 2 | 10.6 | 12.6 | 2 | 2 | 2 | 1 |
| 23 | 27.67874 | 1  | 2 | 5.2  | 9.2  | 2 | 2 | 2 | 1 |
| 24 | 18.51081 | 1  | 1 | 9.1  | 20.4 | 2 | 2 | 2 | 1 |
| 25 | 21.35992 | 12 | 2 | 5    | 7.1  | 2 | 1 | 2 | 1 |
| 26 | 25.23634 | 1  | 2 | 10.6 | 13.6 | 2 | 2 | 2 | 1 |
| 27 | 24.52435 | 1  | 1 | 5.4  | 6.4  | 2 | 1 | 2 | 1 |
| 28 | 18.85882 | 2  | 1 | 19   | 23   | 2 | 1 | 1 | 1 |
| 29 | 29.51594 | 1  | 2 | 6.4  | 7.8  | 2 | 2 | 2 | 1 |
| 30 | 26.75321 | 8  | 2 | 6.8  | 7.5  | 2 | 2 | 2 | 1 |
| 31 | 24.32323 | 1  | 2 | 8.3  | 12.4 | 2 | 1 | 1 | 2 |
| 32 | 21.00073 | 7  | 1 | 8.3  | 10.4 | 2 | 1 | 2 | 1 |
| 33 | 24.03461 | 5  | 2 | 5.8  | 8.7  | 2 | 1 | 2 | 1 |
| 34 | 21.04805 | 8  | 2 | 5.4  | 6    | 2 | 1 | 2 | 1 |
| 35 | 18.66667 | 16 | 1 | 5.7  | 12.2 | 2 | 1 | 1 | 1 |
| 36 | 23.11111 | 5  | 2 | 9.5  | 11.5 | 2 | 1 | 2 | 1 |
| 37 | 24.24392 | 3  | 2 | 4.8  | 6.9  | 2 | 1 | 2 | 1 |
| 38 | 23.37258 | 5  | 2 | 8.5  | 10.4 | 2 | 1 | 2 | 1 |
| 39 | 22.93975 | 4  | 1 | 6.7  | 8.8  | 2 | 2 | 2 | 1 |
| 40 | 23.45656 | 4  | 2 | 5.8  | 15.8 | 2 | 2 | 2 | 1 |
| 41 | 28.76397 | 1  | 2 | 6.1  | 8.2  | 2 | 2 | 2 | 1 |
| 42 | 22.82688 | 13 | 1 | 5.4  | 7.4  | 2 | 1 | 2 | 1 |
| 43 | 21.50189 | 4  | 2 | 7.9  | 9.9  | 2 | 1 | 2 | 1 |
| 44 | 23.96205 | 4  | 1 | 9.8  | 11.3 | 2 | 2 | 2 | 1 |
| 45 | 20.50493 | 8  | 1 | 11.2 | 13.2 | 2 | 2 | 2 | 1 |
| 46 | 24.34176 | 2  | 2 | 6.4  | 9.4  | 2 | 1 | 2 | 1 |
| 47 | 25       | 6  | 2 | 9.8  | 12.8 | 2 | 1 | 2 | 1 |
| 48 | 20.3428  | 1  | 2 | 6.1  | 7.4  | 2 | 2 | 2 | 1 |
| 49 | 18.369   | 4  | 2 | 7.9  | 17.2 | 2 | 2 | 2 | 1 |
| 50 | 21.875   | 2  | 1 | 9.8  | 16.8 | 2 | 2 | 2 | 1 |
| 51 | 22.83288 | 1  | 2 | 6.9  | 10   | 2 | 1 | 2 | 2 |

|    |          |    |   |      |      |   |   |   |   |
|----|----------|----|---|------|------|---|---|---|---|
| 1  |          |    |   |      |      |   |   |   |   |
| 2  | 18.32562 | 5  | 2 | 5.9  | 6    | 2 | 1 | 2 | 1 |
| 3  | 24.34961 | 15 | 1 | 9.8  | 14.5 | 2 | 1 | 2 | 1 |
| 4  | 25.15315 | 13 | 2 | 6.9  | 8.4  | 2 | 2 | 2 | 2 |
| 5  | 18.42025 | 2  | 1 | 8.7  | 12   | 2 | 2 | 2 | 1 |
| 6  | 22.4323  | 18 | 1 | 10   | 14.2 | 2 | 2 | 1 | 1 |
| 7  | 25.96953 | 4  | 2 | 10   | 12   | 2 | 1 | 2 | 1 |
| 8  | 15.78878 | 2  | 1 | 10.8 | 13.7 | 2 | 2 | 2 | 1 |
| 9  | 24.19649 | 15 | 2 | 7.2  | 9.7  | 2 | 2 | 1 | 2 |
| 10 | 23.04688 | 8  | 1 | 16.6 | 20   | 2 | 2 | 1 | 1 |
| 11 | 24.12175 | 5  | 2 | 6.9  | 8.7  | 2 | 2 | 2 | 1 |
| 12 | 17.85714 | 10 | 2 | 10.1 | 17.8 | 2 | 1 | 2 | 1 |
| 13 | 31.95763 | 3  | 2 | 8.8  | 10.5 | 2 | 2 | 2 | 1 |
| 14 | 26.66667 | 3  | 2 | 6.7  | 8.1  | 2 | 1 | 1 | 1 |
| 15 | 20.54419 | 8  | 1 | 10.6 | 11.1 | 2 | 2 | 2 | 1 |
| 16 | 24.65303 | 12 | 1 | 7.3  | 10.2 | 2 | 2 | 2 | 2 |
| 17 | 24.14152 | 2  | 1 | 8.7  | 10.1 | 2 | 2 | 2 | 1 |
| 18 | 21.73801 | 2  | 2 | 6.9  | 9.9  | 2 | 1 | 1 | 1 |
| 19 | 21.32513 | 4  | 2 | 6.3  | 7.3  | 2 | 1 | 1 | 1 |
| 20 | 22.82688 | 11 | 1 | 6.6  | 19.5 | 2 | 1 | 1 | 1 |
| 21 | 24.24392 | 14 | 1 | 9.1  | 13.3 | 2 | 2 | 2 | 1 |
| 22 | 24.34961 | 1  | 2 | 6.9  | 9.7  | 2 | 1 | 2 | 1 |
| 23 | 21.33333 | 8  | 2 | 6.7  | 9.8  | 2 | 1 | 2 | 1 |
| 24 | 19.22338 | 30 | 2 | 5.8  | 10.6 | 2 | 2 | 2 | 1 |
| 25 | 21.90758 | 8  | 1 | 7.2  | 15.2 | 2 | 1 | 1 | 1 |
| 26 | 23.49524 | 6  | 2 | 13   | 18   | 2 | 1 | 2 | 1 |
| 27 | 24.53897 | 3  | 2 | 6.9  | 8.9  | 2 | 1 | 2 | 1 |
| 28 | 25.06575 | 21 | 1 | 5    | 10.3 | 2 | 2 | 2 | 1 |
| 29 | 22.86237 | 5  | 1 | 8.4  | 10.7 | 2 | 2 | 1 | 1 |
| 30 | 20.57613 | 15 | 1 | 9.8  | 12.6 | 2 | 1 | 2 | 2 |
| 31 | 22.22222 | 3  | 2 | 9.6  | 15.1 | 2 | 2 | 2 | 2 |
| 32 | 26.83865 | 1  | 2 | 6.9  | 7.8  | 2 | 2 | 2 | 1 |
| 33 | 23.37258 | 6  | 2 | 9.6  | 15   | 2 | 2 | 1 | 1 |
| 34 | 24.34961 | 20 | 2 | 10.6 | 16.9 | 2 | 1 | 2 | 1 |
| 35 | 37.16563 | 6  | 2 | 5    | 6.9  | 2 | 1 | 2 | 2 |
| 36 | 31.11111 | 4  | 2 | 9.6  | 11.5 | 2 | 2 | 2 | 1 |
| 37 | 25.47666 | 1  | 1 | 6.7  | 9    | 2 | 1 | 2 | 2 |
| 38 | 28.617   | 4  | 1 | 8    | 10   | 2 | 1 | 2 | 1 |
| 39 | 17.60477 | 1  | 1 | 6    | 8.9  | 2 | 2 | 1 | 1 |
| 40 | 20.2395  | 4  | 2 | 9    | 10   | 2 | 2 | 2 | 1 |
| 41 | 23.37258 | 4  | 2 | 5.2  | 6    | 2 | 1 | 1 | 1 |
| 42 | 28.125   | 1  | 2 | 6.9  | 11.6 | 2 | 1 | 2 | 1 |
| 43 | 28.44444 | 12 | 2 | 5.2  | 6.4  | 2 | 2 | 2 | 1 |
| 44 | 23.82813 | 6  | 1 | 8.2  | 11.5 | 2 | 1 | 2 | 2 |
| 45 | 26.83865 | 2  | 2 | 6.7  | 9.8  | 1 | 1 | 2 | 1 |
| 46 | 21.45727 | 4  | 2 | 6.3  | 9.3  | 2 | 1 | 2 | 1 |
| 47 | 28.19692 | 2  | 2 | 5.3  | 11.6 | 2 | 1 | 2 | 1 |
| 48 | 22.31328 | 2  | 1 | 11.5 | 13.5 | 2 | 1 | 2 | 1 |
| 49 | 17.62538 | 2  | 1 | 18.4 | 28.6 | 2 | 2 | 2 | 1 |
| 50 | 18.25632 | 5  | 2 | 9.5  | 10.9 | 1 | 1 | 1 | 2 |
| 51 | 20.2848  | 4  | 2 | 6.5  | 9.5  | 2 | 2 | 2 | 1 |



|    |          |    |   |      |      |   |   |   |   |
|----|----------|----|---|------|------|---|---|---|---|
| 1  |          |    |   |      |      |   |   |   |   |
| 2  | 20.57613 | 5  | 2 | 6.7  | 9.8  | 2 | 1 | 2 | 1 |
| 3  | 26.47918 | 5  | 2 | 9.8  | 12.3 | 2 | 1 | 2 | 1 |
| 4  | 32.45568 | 3  | 2 | 8.7  | 10.3 | 2 | 2 | 2 | 1 |
| 5  | 33.62209 | 22 | 1 | 7.8  | 11.9 | 2 | 1 | 2 | 2 |
| 6  | 23.66864 | 3  | 1 | 6.5  | 9.8  | 2 | 2 | 2 | 1 |
| 7  | 21.33333 | 18 | 1 | 5.5  | 9.8  | 1 | 1 | 2 | 1 |
| 8  | 26.89232 | 5  | 2 | 6.8  | 12.2 | 2 | 2 | 2 | 2 |
| 9  | 22.50693 | 2  | 2 | 8.3  | 10.3 | 2 | 2 | 2 | 1 |
| 10 | 27.14158 | 1  | 2 | 7.6  | 8.7  | 2 | 1 | 1 | 1 |
| 11 | 24.14152 | 7  | 1 | 16.9 | 19.3 | 2 | 1 | 2 | 1 |
| 12 | 27.11111 | 1  | 2 | 4.9  | 9.8  | 2 | 1 | 2 | 1 |
| 13 | 22.23099 | 5  | 2 | 5.8  | 8    | 2 | 1 | 1 | 1 |
| 14 | 23.14815 | 20 | 2 | 6.8  | 9.7  | 2 | 2 | 1 | 2 |
| 15 | 33.12131 | 1  | 2 | 8.7  | 10.6 | 2 | 2 | 1 | 1 |
| 16 | 26.67276 | 1  | 2 | 7.1  | 8.3  | 2 | 1 | 2 | 1 |
| 17 | 24.76757 | 1  | 2 | 5.2  | 6.3  | 2 | 2 | 1 | 1 |
| 18 | 26.67276 | 3  | 2 | 5.8  | 6.8  | 1 | 2 | 1 | 1 |
| 19 | 20.28123 | 1  | 2 | 6.3  | 8.6  | 2 | 2 | 1 | 1 |
| 20 | 20.77562 | 1  | 2 | 10.5 | 21.6 | 1 | 1 | 1 | 1 |
| 21 | 21.09619 | 4  | 2 | 6.2  | 8.5  | 2 | 2 | 1 | 1 |
| 22 | 19.05197 | 2  | 2 | 11.5 | 15   | 2 | 1 | 1 | 1 |
| 23 | 29.33333 | 12 | 2 | 5.6  | 7.9  | 2 | 1 | 2 | 1 |
| 24 | 21.09619 | 5  | 1 | 12.2 | 27.3 | 1 | 1 | 2 | 1 |
| 25 | 28.40816 | 15 | 2 | 8.8  | 14.1 | 2 | 2 | 1 | 1 |
| 26 | 33.28402 | 5  | 2 | 10.6 | 16   | 2 | 2 | 2 | 1 |
| 27 | 26.02618 | 1  | 2 | 6.9  | 9    | 2 | 1 | 2 | 2 |
| 28 | 25.34435 | 2  | 2 | 5.2  | 8.6  | 2 | 2 | 2 | 2 |
| 29 | 26.89767 | 10 | 2 | 6.2  | 9.4  | 2 | 2 | 2 | 1 |
| 30 | 21.21914 | 5  | 2 | 6.9  | 8.3  | 2 | 1 | 1 | 1 |
| 31 | 24       | 5  | 2 | 8.8  | 12.6 | 2 | 2 | 2 | 2 |
| 32 | 30.25193 | 4  | 2 | 6.3  | 9.2  | 2 | 1 | 2 | 1 |
| 33 | 23.82813 | 1  | 2 | 6.6  | 9.7  | 2 | 1 | 2 | 1 |
| 34 | 24.88889 | 1  | 2 | 8.4  | 11.6 | 2 | 2 | 2 | 2 |
| 35 | 29.6875  | 3  | 2 | 5.8  | 7.4  | 2 | 1 | 2 | 1 |
| 36 | 31.20256 | 2  | 2 | 6.1  | 7.3  | 2 | 1 | 1 | 1 |
| 37 | 24.88889 | 2  | 1 | 8.5  | 10.5 | 2 | 1 | 2 | 2 |
| 38 | 20.40816 | 2  | 2 | 6.8  | 10   | 2 | 2 | 2 | 1 |
| 39 | 26.52392 | 3  | 2 | 5.8  | 7    | 2 | 2 | 1 | 1 |
| 40 | 23.8054  | 1  | 2 | 7.1  | 9.8  | 2 | 1 | 1 | 1 |
| 41 | 18.90204 | 17 | 1 | 14.8 | 24.8 | 2 | 2 | 2 | 1 |
| 42 | 17.77778 | 7  | 2 | 10.2 | 14.8 | 2 | 1 | 2 | 1 |
| 43 | 21.82107 | 1  | 2 | 12.6 | 18.6 | 2 | 2 | 2 | 1 |
| 44 | 22.22222 | 2  | 2 | 6.9  | 9.3  | 2 | 1 | 1 | 1 |
| 45 | 21.64127 | 10 | 2 | 6.9  | 9.8  | 2 | 1 | 2 | 1 |
| 46 | 23.30905 | 12 | 1 | 8.8  | 11.6 | 2 | 1 | 2 | 1 |
| 47 | 20.26936 | 6  | 2 | 8.3  | 10.8 | 2 | 2 | 1 | 1 |
| 48 | 26.03749 | 3  | 2 | 8.9  | 11.9 | 2 | 1 | 2 | 1 |
| 49 | 16.87886 | 2  | 1 | 9.8  | 15.5 | 2 | 1 | 2 | 1 |
| 50 | 29.27796 | 1  | 2 | 6.2  | 10.2 | 2 | 2 | 2 | 1 |
| 51 | 23.4375  | 2  | 2 | 14   | 16   | 2 | 2 | 1 | 1 |

|    |          |    |   |      |      |   |   |   |   |
|----|----------|----|---|------|------|---|---|---|---|
| 1  |          |    |   |      |      |   |   |   |   |
| 2  | 23.14815 | 1  | 2 | 9    | 16   | 2 | 2 | 1 | 1 |
| 3  | 25.96953 | 2  | 2 | 5.2  | 7.8  | 2 | 1 | 2 | 1 |
| 4  | 19.39619 | 15 | 2 | 5.4  | 8.4  | 2 | 1 | 2 | 2 |
| 5  | 27.70083 | 1  | 2 | 5.2  | 7.8  | 2 | 1 | 2 | 1 |
| 6  |          |    |   |      |      |   |   |   |   |
| 7  | 24.23823 | 1  | 1 | 5.8  | 9.2  | 2 | 2 | 2 | 1 |
| 8  | 24.88889 | 1  | 2 | 6.7  | 16.2 | 2 | 2 | 2 | 2 |
| 9  | 24       | 3  | 2 | 8.7  | 8.2  | 2 | 1 | 2 | 1 |
| 10 | 28.56648 | 2  | 2 | 9.1  | 8.4  | 2 | 1 | 2 | 2 |
| 11 | 35.69304 | 4  | 1 | 7.8  | 16.1 | 2 | 2 | 2 | 1 |
| 12 |          |    |   |      |      |   |   |   |   |
| 13 | 25.31545 | 1  | 2 | 9.2  | 15.6 | 2 | 1 | 2 | 1 |
| 14 | 29.37758 | 5  | 2 | 6.5  | 9.4  | 2 | 1 | 1 | 1 |
| 15 | 23.1911  | 4  | 2 | 6.4  | 12.3 | 2 | 2 | 1 | 1 |
| 16 | 25.77778 | 1  | 2 | 5.6  | 7.3  | 2 | 2 | 2 | 1 |
| 17 | 22.22222 | 1  | 1 | 4.6  | 7.2  | 2 | 2 | 2 | 1 |
| 18 |          |    |   |      |      |   |   |   |   |
| 19 | 17.48179 | 20 | 2 | 5.8  | 7.9  | 2 | 2 | 2 | 1 |
| 20 | 25.43748 | 2  | 2 | 6.4  | 12.3 | 2 | 1 | 2 | 1 |
| 21 | 22.34778 | 3  | 2 | 5.8  | 9.4  | 2 | 2 | 2 | 2 |
| 22 | 24.86395 | 1  | 2 | 15.2 | 21.1 | 2 | 2 | 1 | 1 |
| 23 |          |    |   |      |      |   |   |   |   |
| 24 | 28.72008 | 18 | 2 | 6.8  | 10.3 | 2 | 1 | 2 | 1 |
| 25 | 23.83301 | 3  | 2 | 5.8  | 9.7  | 2 | 2 | 1 | 1 |
| 26 | 25.77778 | 10 | 2 | 5.3  | 5.5  | 2 | 1 | 2 | 1 |
| 27 | 25.5367  | 2  | 2 | 9.8  | 10.2 | 2 | 2 | 2 | 1 |
| 28 | 22.07108 | 2  | 2 | 7    | 9    | 2 | 2 | 2 | 2 |
| 29 |          |    |   |      |      |   |   |   |   |
| 30 | 22.22222 | 30 | 2 | 10   | 20.6 | 2 | 2 | 1 | 2 |
| 31 | 24.55775 | 12 | 2 | 6.9  | 15.6 | 2 | 2 | 1 | 1 |
| 32 | 12.98477 | 4  | 2 | 5.5  | 9.9  | 2 | 2 | 2 | 2 |
| 33 | 22.81293 | 2  | 2 | 5.5  | 10.4 | 2 | 2 | 2 | 2 |
| 34 | 24.83576 | 12 | 1 | 5.5  | 9.9  | 2 | 2 | 1 | 1 |
| 35 |          |    |   |      |      |   |   |   |   |
| 36 | 20.54569 | 10 | 2 | 2.6  | 4.5  | 2 | 2 | 2 | 1 |
| 37 | 27.09925 | 1  | 2 | 5.9  | 10.5 | 2 | 1 | 2 | 1 |
| 38 | 24.83576 | 2  | 2 | 5.5  | 9.9  | 2 | 2 | 2 | 1 |
| 39 | 29.77778 | 1  | 2 | 2.6  | 4.5  | 2 | 2 | 2 | 1 |
| 40 | 25.06575 | 3  | 2 | 5.9  | 4.3  | 2 | 2 | 2 | 1 |
| 41 |          |    |   |      |      |   |   |   |   |
| 42 | 19.90997 | 10 | 2 | 5.5  | 4.2  | 2 | 1 | 2 | 1 |
| 43 | 22.18935 | 17 | 2 | 2.6  | 18.1 | 2 | 2 | 2 | 1 |
| 44 | 23.45656 | 3  | 2 | 5.9  | 6.1  | 2 | 1 | 2 | 1 |
| 45 | 26.74048 | 5  | 2 | 6.6  | 8.7  | 2 | 1 | 2 | 1 |
| 46 | 24.52682 | 18 | 2 | 6.8  | 12.3 | 2 | 1 | 2 | 1 |
| 47 |          |    |   |      |      |   |   |   |   |
| 48 | 24       | 2  | 2 | 6.2  | 8    | 2 | 1 | 2 | 2 |
| 49 | 20.88889 | 1  | 2 | 6.2  | 9.9  | 2 | 2 | 1 | 1 |
| 50 | 27.55556 | 3  | 2 | 15   | 20   | 2 | 1 | 2 | 1 |
| 51 | 15.55556 | 4  | 1 | 5.8  | 9.2  | 2 | 1 | 2 | 1 |
| 52 | 26.66667 | 20 | 2 | 6.2  | 9.4  | 2 | 1 | 2 | 1 |
| 53 |          |    |   |      |      |   |   |   |   |
| 54 | 18.73049 | 1  | 1 | 6.2  | 9.6  | 2 | 2 | 1 | 1 |
| 55 | 19.47715 | 16 | 1 | 16.2 | 21.6 | 2 | 2 | 2 | 1 |
| 56 | 25.63692 | 2  | 2 | 5.8  | 7.2  | 2 | 2 | 2 | 1 |
| 57 | 26.56435 | 1  | 2 | 6.2  | 8.5  | 2 | 1 | 2 | 2 |
| 58 | 22.22222 | 6  | 2 | 7    | 11   | 2 | 2 | 2 | 2 |
| 59 | 25.06575 | 21 | 2 | 7    | 10   | 2 | 2 | 2 | 1 |
| 60 | 22.18364 | 1  | 2 | 6    | 7    | 2 | 2 | 2 | 1 |

|    |          |    |   |      |      |   |   |   |   |
|----|----------|----|---|------|------|---|---|---|---|
| 1  |          |    |   |      |      |   |   |   |   |
| 2  | 20.25463 | 1  | 2 | 6    | 15   | 2 | 2 | 2 | 1 |
| 3  | 24.65303 | 6  | 2 | 6    | 9    | 2 | 2 | 2 | 1 |
| 4  | 21.45727 | 1  | 2 | 6    | 8    | 2 | 2 | 2 | 1 |
| 5  | 22.04917 | 1  | 2 | 9    | 15   | 2 | 2 | 2 | 1 |
| 6  | 27.00617 | 3  | 1 | 6    | 18   | 2 | 2 | 2 | 1 |
| 7  | 19.29012 | 1  | 2 | 12   | 19   | 2 | 2 | 1 | 1 |
| 8  | 31.63265 | 3  | 2 | 7    | 12   | 2 | 2 | 1 | 2 |
| 9  | 25.10388 | 10 | 1 | 7    | 4    | 2 | 2 | 2 | 1 |
| 10 | 18.73049 | 2  | 2 | 6    | 7    | 2 | 1 | 2 | 1 |
| 11 | 27.30519 | 1  | 2 | 9    | 11   | 2 | 2 | 2 | 1 |
| 12 | 22.95918 | 4  | 2 | 6    | 5    | 2 | 2 | 2 | 1 |
| 13 | 24.59491 | 6  | 1 | 5.7  | 13   | 2 | 2 | 2 | 1 |
| 14 | 22.98743 | 13 | 2 | 11.1 | 21   | 2 | 2 | 2 | 1 |
| 15 | 22.07108 | 16 | 2 | 8.5  | 12   | 2 | 2 | 2 | 2 |
| 16 | 21.91381 | 8  | 2 | 8    | 13   | 2 | 2 | 2 | 1 |
| 17 | 37.06136 | 2  | 2 | 7    | 10   | 2 | 2 | 2 | 2 |
| 18 | 26.52392 | 5  | 2 | 6    | 7    | 2 | 2 | 2 | 1 |
| 19 | 36.88889 | 1  | 2 | 6    | 10   | 2 | 2 | 2 | 2 |
| 20 | 29.51594 | 1  | 2 | 5    | 7    | 2 | 2 | 2 | 1 |
| 21 | 24.4646  | 8  | 1 | 9    | 11   | 2 | 2 | 2 | 1 |
| 22 | 20.95717 | 8  | 1 | 3    | 6    | 2 | 2 | 2 | 1 |
| 23 | 21.20845 | 15 | 1 | 10   | 13   | 2 | 1 | 2 | 1 |
| 24 | 22.27531 | 24 | 1 | 7    | 12   | 2 | 2 | 2 | 1 |
| 25 | 16.86625 | 3  | 2 | 15   | 19   | 1 | 2 | 2 | 2 |
| 26 | 21.40309 | 2  | 2 | 6    | 21   | 2 | 2 | 2 | 2 |
| 27 | 33.76039 | 4  | 2 | 7    | 13   | 2 | 2 | 1 | 1 |
| 28 | 29.24211 | 8  | 1 | 7    | 15   | 1 | 2 | 2 | 1 |
| 29 | 24.38653 | 10 | 2 | 9    | 12   | 2 | 2 | 2 | 2 |
| 30 | 22.50693 | 1  | 2 | 12   | 15   | 2 | 2 | 2 | 1 |
| 31 | 20.95717 | 3  | 1 | 7    | 9    | 2 | 2 | 2 | 1 |
| 32 | 24.60938 | 14 | 1 | 7    | 17   | 2 | 2 | 2 | 2 |
| 33 | 23.55556 | 4  | 2 | 10   | 13   | 2 | 2 | 2 | 2 |
| 34 | 22.34778 | 9  | 2 | 4.5  | 6    | 2 | 2 | 2 | 2 |
| 35 | 20.79673 | 5  | 2 | 12   | 15   | 1 | 1 | 2 | 1 |
| 36 | 38.77551 | 2  | 2 | 8    | 10   | 2 | 2 | 2 | 2 |
| 37 | 27.02581 | 5  | 1 | 8.8  | 9    | 2 | 2 | 2 | 1 |
| 38 | 21.91381 | 5  | 1 | 7    | 23   | 2 | 2 | 2 | 1 |
| 39 | 25.55941 | 5  | 2 | 5.8  | 7.2  | 2 | 2 | 2 | 1 |
| 40 | 24.11265 | 1  | 2 | 5.5  | 8    | 2 | 2 | 2 | 2 |
| 41 | 27.39226 | 2  | 2 | 5.4  | 8    | 2 | 1 | 2 | 1 |
| 42 | 30.38194 | 1  | 2 | 5    | 9    | 2 | 2 | 2 | 1 |
| 43 | 26.66667 | 1  | 2 | 6    | 8    | 2 | 1 | 2 | 1 |
| 44 | 20.17264 | 7  | 2 | 11   | 16   | 2 | 2 | 2 | 2 |
| 45 | 23.78121 | 3  | 1 | 9    | 12.5 | 2 | 2 | 2 | 2 |
| 46 | 35.0032  | 12 | 2 | 9    | 12   | 2 | 1 | 2 | 2 |
| 47 | 24.69136 | 5  | 1 | 14   | 20   | 2 | 2 | 2 | 2 |
| 48 | 18.87755 | 5  | 2 | 6.5  | 7    | 2 | 2 | 2 | 2 |
| 49 | 29.96433 | 1  | 2 | 7    | 7    | 2 | 2 | 2 | 1 |
| 50 | 27.77227 | 6  | 2 | 7    | 9    | 2 | 2 | 2 | 2 |
| 51 | 29.96433 | 7  | 1 | 16   | 26   | 2 | 1 | 2 | 1 |

|    |          |     |   |      |       |   |   |   |   |
|----|----------|-----|---|------|-------|---|---|---|---|
| 1  |          |     |   |      |       |   |   |   |   |
| 2  | 28.76397 | 1   | 2 | 4    | 6     | 2 | 2 | 2 | 1 |
| 3  | 24.73246 | 1   | 2 | 8    | 12    | 2 | 2 | 2 | 2 |
| 4  | 25.39063 | 2   | 2 | 5.1  | 13    | 2 | 2 | 2 | 1 |
| 5  | 25       | 12  | 2 | 6    | 10    | 2 | 1 | 2 | 1 |
| 6  | 20.68515 | 7   | 1 | 13   | 17    | 2 | 2 | 1 | 1 |
| 7  | 20.88889 | 12  | 2 | 3    | 6     | 2 | 1 | 2 | 1 |
| 8  | 23.92569 | 12  | 2 | 9    | 16    | 2 | 2 | 1 | 1 |
| 9  | 23.01118 | 15  | 1 | 8    | 10    | 2 | 1 | 2 | 1 |
| 10 | 22.76944 | 3   | 2 | 6    | 7     | 2 | 2 | 1 | 1 |
| 11 | 24.88889 | 3   | 2 | 12.1 | 16.2  | 2 | 2 | 2 | 2 |
| 12 | 25.56611 | 5   | 2 | 12   | 16    | 2 | 2 | 2 | 1 |
| 13 | 25.29938 | 10  | 2 | 7    | 10    | 2 | 2 | 2 | 1 |
| 14 | 15.78878 | 2   | 2 | 15   | 25    | 2 | 2 | 2 | 1 |
| 15 | 23.37258 | 2   | 2 | 6    | 6     | 2 | 2 | 2 | 1 |
| 16 | 26.50212 | 12  | 2 | 10   | 10    | 2 | 2 | 2 | 1 |
| 17 | 26.43807 | 1   | 2 | 8    | 10    | 2 | 2 | 2 | 1 |
| 18 | 28.84153 | 2   | 1 | 12   | 17    | 2 | 1 | 2 | 1 |
| 19 | 27.11111 | 1   | 2 | 8.4  | 11.6  | 2 | 2 | 2 | 1 |
| 20 | 25.39063 | 5   | 2 | 8    | 10.8  | 2 | 2 | 2 | 1 |
| 21 | 16.88889 | 1   | 2 | 18.3 | 24    | 2 | 2 | 2 | 1 |
| 22 | 16.44444 | 2   | 1 | 4.8  | 6.6   | 2 | 2 | 2 | 1 |
| 23 | 18.97453 | 1   | 2 | 5.6  | 7     | 2 | 2 | 2 | 1 |
| 24 | 24.19649 | 1.5 | 2 | 7    | 9     | 2 | 2 | 2 | 1 |
| 25 | 27.70083 | 3   | 2 | 12   | 15    | 2 | 2 | 2 | 1 |
| 26 | 25.55941 | 3   | 2 | 16   | 18    | 2 | 2 | 2 | 1 |
| 27 | 31.11111 | 5   | 2 | 5    | 7     | 2 | 2 | 2 | 1 |
| 28 | 20.45184 | 3   | 2 | 10   | 13    | 2 | 2 | 2 | 1 |
| 29 | 28.53746 | 6   | 2 | 8    | 10    | 2 | 2 | 2 | 2 |
| 30 | 27.23922 | 4   | 1 | 7    | 9     | 2 | 2 | 2 | 1 |
| 31 | 28.88889 | 2   | 2 | 20   | 22.6  | 2 | 2 | 2 | 1 |
| 32 | 19.3414  | 9   | 2 | 16   | 18    | 2 | 2 | 2 | 1 |
| 33 | 23.11111 | 3   | 2 | 3    | 7     | 2 | 1 | 2 | 1 |
| 34 | 20.77562 | 17  | 1 | 12   | 15    | 2 | 2 | 2 | 1 |
| 35 | 24.9401  | 2   | 2 | 20   | 24    | 2 | 2 | 2 | 1 |
| 36 | 19.5006  | 10  | 2 | 8    | 11    | 2 | 2 | 2 | 2 |
| 37 | 20.66116 | 4   | 2 | 8    | 10    | 2 | 2 | 2 | 1 |
| 38 | 28.30533 | 4   | 2 | 5    | 7.2   | 2 | 2 | 2 | 1 |
| 39 | 27.30344 | 2   | 2 | 3    | 7.5   | 2 | 2 | 2 | 1 |
| 40 | 25.33308 | 2   | 2 | 8    | 11    | 2 | 2 | 2 | 1 |
| 41 | 20.44444 | 5   | 2 | 24   | 28.52 | 2 | 2 | 2 | 1 |
| 42 | 25.33308 | 8   | 2 | 3.1  | 8.6   | 2 | 2 | 2 | 1 |
| 43 | 29.16667 | 2   | 2 | 9    | 11    | 2 | 2 | 2 | 2 |
| 44 | 19.29012 | 2   | 2 | 9    | 11    | 2 | 2 | 2 | 1 |
| 45 | 24.7768  | 2   | 2 | 3.1  | 4.6   | 2 | 2 | 2 | 1 |
| 46 | 40.97222 | 2   | 2 | 10   | 11    | 2 | 2 | 2 | 1 |
| 47 | 26.74048 | 6   | 2 | 3.1  | 8.5   | 2 | 2 | 2 | 1 |
| 48 | 23.87512 | 6   | 2 | 5    | 6.4   | 2 | 2 | 2 | 2 |
| 49 | 24.38653 | 13  | 2 | 15   | 17    | 1 | 2 | 2 | 1 |
| 50 | 18.26151 | 1   | 2 | 9    | 12    | 2 | 2 | 2 | 1 |
| 51 | 40.97222 | 9   | 2 | 10   | 11    | 2 | 2 | 2 | 2 |

|    |          |    |   |      |      |   |   |   |   |
|----|----------|----|---|------|------|---|---|---|---|
| 1  |          |    |   |      |      |   |   |   |   |
| 2  | 23.30887 | 8  | 2 | 8    | 10   | 2 | 1 | 2 | 1 |
| 3  | 21.08281 | 3  | 1 | 10   | 11   | 2 | 2 | 2 | 1 |
| 4  | 21.82107 | 5  | 2 | 9    | 11   | 2 | 2 | 2 | 1 |
| 5  | 18.71804 | 8  | 1 | 4    | 8    | 2 | 2 | 2 | 1 |
| 6  | 16.87886 | 2  | 2 | 10   | 17   | 2 | 2 | 2 | 1 |
| 7  | 23.55556 | 20 | 1 | 11   | 14   | 2 | 2 | 2 | 1 |
| 8  | 24.87772 | 10 | 2 | 12   | 15   | 2 | 2 | 2 | 1 |
| 9  | 20.02884 | 2  | 2 | 5    | 6.4  | 2 | 2 | 2 | 1 |
| 10 | 17.14678 | 3  | 2 | 10   | 12   | 2 | 2 | 2 | 2 |
| 11 | 19.17458 | 3  | 2 | 4    | 6    | 2 | 2 | 2 | 1 |
| 12 | 24.88889 | 13 | 1 | 18   | 22   | 2 | 2 | 2 | 1 |
| 13 | 32.02909 | 4  | 1 | 10   | 12   | 2 | 2 | 2 | 1 |
| 14 | 24.32323 | 5  | 1 | 8    | 11   | 2 | 2 | 2 | 1 |
| 15 | 17.62538 | 12 | 1 | 8    | 12   | 2 | 2 | 2 | 1 |
| 16 | 19.14063 | 12 | 1 | 7    | 9    | 2 | 2 | 2 | 1 |
| 17 | 23.73996 | 25 | 2 | 18   | 20   | 2 | 2 | 2 | 1 |
| 18 | 22.83288 | 23 | 1 | 15   | 17   | 2 | 2 | 2 | 1 |
| 19 | 23.49524 | 8  | 2 | 5    | 7    | 2 | 2 | 2 | 1 |
| 20 | 26.53061 | 6  | 2 | 6    | 9    | 2 | 2 | 2 | 2 |
| 21 | 21.20845 | 10 | 1 | 9.8  | 14   | 2 | 2 | 2 | 1 |
| 22 | 25.78853 | 9  | 2 | 9    | 11   | 2 | 2 | 2 | 1 |
| 23 | 42.80618 | 1  | 2 | 5    | 7    | 2 | 2 | 2 | 1 |
| 24 | 24.97399 | 1  | 2 | 14   | 15   | 1 | 2 | 2 | 1 |
| 25 | 23.1405  | 2  | 1 | 17   | 21   | 1 | 1 | 2 | 1 |
| 26 | 25.91068 | 5  | 1 | 8    | 11   | 2 | 2 | 2 | 1 |
| 27 | 24.33748 | 1  | 2 | 6    | 7    | 2 | 2 | 2 | 1 |
| 28 | 22.10029 | 15 | 2 | 5    | 7    | 1 | 2 | 2 | 1 |
| 29 | 33.16327 | 13 | 2 | 5    | 8    | 2 | 2 | 2 | 1 |
| 30 | 17.26355 | 3  | 2 | 8    | 10   | 1 | 2 | 2 | 1 |
| 31 | 23.82813 | 5  | 2 | 11   | 15   | 2 | 2 | 2 | 2 |
| 32 | 24.55775 | 2  | 1 | 8    | 10   | 2 | 2 | 2 | 1 |
| 33 | 22.22222 | 12 | 1 | 6    | 9    | 2 | 2 | 2 | 2 |
| 34 | 20       | 1  | 2 | 8    | 12   | 1 | 2 | 1 | 1 |
| 35 | 31.25    | 3  | 2 | 7    | 9    | 2 | 2 | 2 | 1 |
| 36 | 14.09846 | 2  | 1 | 11   | 15   | 2 | 2 | 2 | 1 |
| 37 | 27.0538  | 28 | 1 | 17   | 19   | 2 | 2 | 2 | 2 |
| 38 | 23.1405  | 1  | 2 | 12   | 15   | 2 | 2 | 2 | 1 |
| 39 | 21.91381 | 1  | 1 | 4    | 6    | 2 | 2 | 2 | 1 |
| 40 | 23.37258 | 3  | 2 | 6.2  | 8.3  | 2 | 2 | 2 | 1 |
| 41 | 23.14815 | 5  | 2 | 4.2  | 6.4  | 2 | 1 | 2 | 1 |
| 42 | 20.17264 | 2  | 2 | 7.8  | 9.7  | 2 | 2 | 2 | 2 |
| 43 | 24.45606 | 12 | 1 | 6.5  | 8.2  | 2 | 1 | 2 | 2 |
| 44 | 15.75575 | 5  | 1 | 6.7  | 9.1  | 2 | 2 | 2 | 1 |
| 45 | 24.74745 | 22 | 1 | 6.1  | 12.4 | 2 | 2 | 2 | 1 |
| 46 | 25.20479 | 6  | 2 | 10.5 | 15.3 | 2 | 2 | 1 | 1 |
| 47 | 23.73866 | 2  | 1 | 10.8 | 14.6 | 2 | 2 | 2 | 1 |
| 48 | 25.5367  | 3  | 2 | 6.2  | 8.1  | 2 | 2 | 2 | 1 |
| 49 | 24.44444 | 2  | 2 | 6.8  | 8.1  | 1 | 2 | 2 | 1 |
| 50 | 23.8054  | 1  | 1 | 6.2  | 9.7  | 2 | 1 | 2 | 1 |
| 51 | 21.40309 | 3  | 2 | 5.8  | 9.7  | 2 | 2 | 2 | 1 |

|    |          |    |   |      |      |   |   |   |   |
|----|----------|----|---|------|------|---|---|---|---|
| 1  |          |    |   |      |      |   |   |   |   |
| 2  | 25.5367  | 4  | 2 | 10.8 | 18.7 | 2 | 1 | 1 | 1 |
| 3  | 28.99931 | 5  | 2 | 5.3  | 8.5  | 1 | 2 | 2 | 1 |
| 4  | 23.23346 | 15 | 2 | 6.3  | 7.6  | 2 | 2 | 2 | 1 |
| 5  | 25.63692 | 3  | 2 | 18.1 | 24.1 | 2 | 2 | 2 | 1 |
| 6  | 26.22222 | 14 | 1 | 9.8  | 15.9 | 2 | 2 | 2 | 1 |
| 7  | 26.40236 | 3  | 2 | 5.2  | 6.3  | 2 | 2 | 2 | 1 |
| 8  | 29.04866 | 3  | 1 | 8.8  | 15.5 | 2 | 2 | 2 | 1 |
| 9  | 29.09428 | 8  | 2 | 8.2  | 11   | 2 | 2 | 2 | 1 |
| 10 | 19.81405 | 1  | 2 | 6.2  | 9.9  | 1 | 1 | 2 | 1 |
| 11 | 25.07716 | 3  | 2 | 6.2  | 9.4  | 2 | 1 | 1 | 1 |
| 12 | 24.03441 | 9  | 2 | 6.8  | 10   | 2 | 2 | 2 | 1 |
| 13 | 22.77319 | 1  | 2 | 6.2  | 8.5  | 2 | 2 | 2 | 1 |
| 14 | 24.91077 | 11 | 2 | 17   | 22.7 | 2 | 2 | 2 | 1 |
| 15 | 25.63692 | 4  | 2 | 8.9  | 10.6 | 2 | 2 | 2 | 1 |
| 16 | 27.77671 | 1  | 2 | 6.2  | 8.8  | 2 | 2 | 2 | 1 |
| 17 | 20.41523 | 20 | 1 | 6.1  | 7.8  | 2 | 1 | 1 | 1 |
| 18 | 26.7094  | 6  | 2 | 9.8  | 11.5 | 2 | 2 | 1 | 1 |
| 19 | 18.13122 | 4  | 1 | 9.1  | 12.6 | 2 | 2 | 1 | 1 |
| 20 | 21.77844 | 2  | 1 | 17.6 | 26.4 | 2 | 2 | 1 | 1 |
| 21 | 22.86253 | 25 | 1 | 14.2 | 18.2 | 1 | 1 | 1 | 1 |
| 22 | 22.81293 | 12 | 1 | 6.3  | 9.5  | 2 | 1 | 2 | 1 |
| 23 | 23.4375  | 11 | 2 | 9.8  | 13.7 | 2 | 1 | 1 | 1 |
| 24 | 30.7574  | 15 | 1 | 6.1  | 8.4  | 2 | 2 | 2 | 1 |
| 25 | 24.6755  | 7  | 2 | 6.7  | 11   | 2 | 2 | 1 | 1 |
| 26 | 18.09034 | 5  | 2 | 6.2  | 10   | 2 | 2 | 2 | 1 |
| 27 | 26.40236 | 7  | 2 | 5.8  | 7.7  | 2 | 2 | 1 | 1 |
| 28 | 20.3428  | 3  | 2 | 10   | 12.8 | 2 | 2 | 2 | 1 |
| 29 | 32.45472 | 1  | 2 | 5    | 6    | 2 | 2 | 2 | 1 |
| 30 | 28.76397 | 8  | 2 | 12   | 19   | 2 | 2 | 2 | 2 |
| 31 | 25.33333 | 6  | 1 | 8    | 17   | 2 | 2 | 1 | 1 |
| 32 | 28       | 5  | 1 | 8.7  | 6    | 2 | 2 | 1 | 2 |
| 33 | 48.65917 | 9  | 2 | 7    | 14   | 2 | 2 | 1 | 1 |
| 34 | 24.57787 | 3  | 2 | 7    | 9    | 1 | 2 | 2 | 1 |
| 35 | 22.6659  | 11 | 2 | 7    | 11   | 2 | 2 | 2 | 1 |
| 36 | 26.66667 | 6  | 2 | 5    | 8    | 2 | 1 | 2 | 1 |
| 37 | 22.07108 | 10 | 2 | 5    | 11   | 2 | 2 | 2 | 1 |
| 38 | 28.88889 | 20 | 1 | 9    | 13   | 2 | 2 | 1 | 1 |
| 39 | 28.13366 | 1  | 2 | 8.6  | 7    | 2 | 2 | 2 | 1 |
| 40 | 24.11265 | 1  | 1 | 10   | 5    | 2 | 2 | 2 | 1 |
| 41 | 29.86496 | 4  | 2 | 10   | 5    | 2 | 2 | 2 | 1 |
| 42 | 23.61275 | 2  | 2 | 7    | 10   | 2 | 2 | 2 | 1 |
| 43 | 19.69267 | 12 | 1 | 9    | 14   | 2 | 2 | 2 | 2 |
| 44 | 23.78121 | 4  | 2 | 6    | 8    | 2 | 2 | 1 | 2 |
| 45 | 22.5183  | 20 | 2 | 7    | 10   | 2 | 2 | 2 | 1 |
| 46 | 23.73866 | 8  | 1 | 7    | 10   | 1 | 2 | 1 | 2 |
| 47 | 22.60026 | 17 | 1 | 12   | 14   | 2 | 2 | 2 | 1 |
| 48 | 24.7768  | 10 | 2 | 6    | 24   | 2 | 2 | 2 | 1 |
| 49 | 30.70041 | 1  | 1 | 16.2 | 18.9 | 2 | 2 | 1 | 1 |
| 50 | 31.20256 | 7  | 2 | 6.2  | 9.8  | 2 | 2 | 1 | 1 |
| 51 | 48.07256 | 1  | 2 | 8.6  | 11.9 | 2 | 2 | 2 | 1 |

|    |          |    |   |      |      |   |   |   |   |
|----|----------|----|---|------|------|---|---|---|---|
| 1  |          |    |   |      |      |   |   |   |   |
| 2  | 22.81293 | 1  | 2 | 8.9  | 13.8 | 2 | 2 | 1 | 1 |
| 3  | 23.72529 | 2  | 1 | 5.6  | 7    | 2 | 2 | 2 | 1 |
| 4  | 17.77778 | 12 | 1 | 10.8 | 23.8 | 2 | 2 | 2 | 1 |
| 5  | 18.25632 | 1  | 2 | 7.4  | 10.9 | 2 | 1 | 2 | 1 |
| 6  | 17.84336 | 7  | 2 | 11.8 | 20.2 | 2 | 1 | 2 | 1 |
| 7  | 20.61313 | 3  | 2 | 5.2  | 7.1  | 2 | 2 | 1 | 1 |
| 8  | 25.5367  | 1  | 1 | 6.8  | 10.1 | 2 | 2 | 2 | 1 |
| 9  | 26.95313 | 1  | 1 | 8.7  | 11.5 | 2 | 2 | 2 | 1 |
| 10 | 20       | 6  | 2 | 5.2  | 7.6  | 2 | 2 | 2 | 1 |
| 11 | 29.89969 | 1  | 2 | 6.7  | 8.8  | 2 | 2 | 2 | 1 |
| 12 | 29.09428 | 2  | 2 | 7.8  | 10.4 | 2 | 2 | 1 | 1 |
| 13 | 20.77562 | 1  | 2 | 8.5  | 21.1 | 2 | 1 | 2 | 1 |
| 14 | 27.43484 | 1  | 2 | 6.9  | 8.8  | 2 | 2 | 1 | 1 |
| 15 | 16.46436 | 12 | 1 | 21.2 | 24.2 | 1 | 2 | 1 | 1 |
| 16 | 21.08281 | 5  | 2 | 12.4 | 17   | 2 | 2 | 1 | 1 |
| 17 | 31.64429 | 12 | 2 | 10.4 | 15   | 2 | 1 | 1 | 1 |
| 18 | 35.14273 | 4  | 2 | 6.3  | 9.4  | 2 | 1 | 2 | 2 |
| 19 | 19.53125 | 1  | 1 | 10   | 13   | 1 | 2 | 1 | 1 |
| 20 | 27.83029 | 7  | 2 | 10.9 | 13.8 | 2 | 2 | 1 | 1 |
| 21 | 16.44444 | 5  | 2 | 6    | 7.7  | 2 | 1 | 2 | 1 |
| 22 | 22.58271 | 2  | 2 | 6.7  | 10.4 | 1 | 1 | 2 | 1 |
| 23 | 21.64127 | 1  | 1 | 5.7  | 9.3  | 2 | 2 | 1 | 1 |
| 24 | 24.97399 | 8  | 2 | 9    | 10   | 2 | 2 | 2 | 1 |
| 25 | 20.07775 | 2  | 1 | 10.5 | 15.4 | 2 | 2 | 1 | 1 |
| 26 | 27.40766 | 2  | 2 | 12   | 14   | 2 | 2 | 2 | 1 |
| 27 | 27.20961 | 4  | 2 | 5.5  | 6.6  | 2 | 2 | 1 | 1 |
| 28 | 19.55556 | 1  | 2 | 5.8  | 8.9  | 2 | 2 | 1 | 2 |
| 29 | 26.14269 | 3  | 2 | 9.4  | 14.3 | 2 | 2 | 1 | 1 |
| 30 | 32.43945 | 2  | 2 | 6.2  | 9.5  | 2 | 2 | 1 | 2 |
| 31 | 26.37024 | 3  | 2 | 9.8  | 13.3 | 2 | 2 | 1 | 1 |
| 32 | 20.88889 | 12 | 1 | 10.1 | 14.6 | 2 | 2 | 1 | 1 |
| 33 | 27.26801 | 1  | 2 | 6    | 11.4 | 2 | 2 | 1 | 1 |
| 34 | 19.17458 | 1  | 2 | 6    | 8.4  | 2 | 2 | 1 | 1 |
| 35 | 23.42209 | 2  | 1 | 6.8  | 12.5 | 2 | 2 | 1 | 1 |
| 36 | 26.83865 | 19 | 2 | 8.9  | 13.9 | 2 | 2 | 2 | 1 |
| 37 | 23.63403 | 12 | 2 | 10   | 12.2 | 2 | 2 | 2 | 1 |
| 38 | 19.56295 | 1  | 2 | 16.2 | 20.5 | 2 | 1 | 2 | 1 |
| 39 | 29.77778 | 10 | 1 | 6    | 8.8  | 2 | 2 | 2 | 1 |
| 40 | 21.21914 | 3  | 1 | 11.6 | 19.6 | 2 | 1 | 2 | 1 |
| 41 | 15.82216 | 1  | 2 | 8.8  | 15.6 | 2 | 1 | 2 | 1 |
| 42 | 27.43484 | 4  | 2 | 10.8 | 15.4 | 1 | 2 | 2 | 2 |
| 43 | 30.76923 | 7  | 1 | 11.6 | 18.2 | 2 | 2 | 2 | 2 |
| 44 | 24.21875 | 1  | 1 | 9    | 10   | 1 | 2 | 2 | 1 |
| 45 | 25.39063 | 6  | 2 | 6.5  | 7.9  | 1 | 1 | 2 | 1 |
| 46 | 21.82107 | 7  | 2 | 5.4  | 6.4  | 2 | 2 | 2 | 1 |
| 47 | 23.23346 | 7  | 2 | 4.5  | 9.3  | 2 | 1 | 1 | 1 |
| 48 | 33.77744 | 2  | 2 | 6.1  | 7.2  | 2 | 2 | 1 | 1 |
| 49 | 27.04082 | 4  | 2 | 5.9  | 6.5  | 2 | 2 | 1 | 1 |
| 50 | 29.15452 | 20 | 2 | 8.9  | 11   | 2 | 1 | 2 | 1 |
| 51 | 24.87772 | 5  | 2 | 6.6  | 7.7  | 2 | 1 | 2 | 1 |

|    |          |   |   |     |    |   |   |   |   |
|----|----------|---|---|-----|----|---|---|---|---|
| 1  |          |   |   |     |    |   |   |   |   |
| 2  | 32.04615 | 2 | 2 | 5.7 | 10 | 2 | 1 | 2 | 1 |
| 3  |          |   |   |     |    |   |   |   |   |
| 4  |          |   |   |     |    |   |   |   |   |
| 5  |          |   |   |     |    |   |   |   |   |
| 6  |          |   |   |     |    |   |   |   |   |
| 7  |          |   |   |     |    |   |   |   |   |
| 8  |          |   |   |     |    |   |   |   |   |
| 9  |          |   |   |     |    |   |   |   |   |
| 10 |          |   |   |     |    |   |   |   |   |
| 11 |          |   |   |     |    |   |   |   |   |
| 12 |          |   |   |     |    |   |   |   |   |
| 13 |          |   |   |     |    |   |   |   |   |
| 14 |          |   |   |     |    |   |   |   |   |
| 15 |          |   |   |     |    |   |   |   |   |
| 16 |          |   |   |     |    |   |   |   |   |
| 17 |          |   |   |     |    |   |   |   |   |
| 18 |          |   |   |     |    |   |   |   |   |
| 19 |          |   |   |     |    |   |   |   |   |
| 20 |          |   |   |     |    |   |   |   |   |
| 21 |          |   |   |     |    |   |   |   |   |
| 22 |          |   |   |     |    |   |   |   |   |
| 23 |          |   |   |     |    |   |   |   |   |
| 24 |          |   |   |     |    |   |   |   |   |
| 25 |          |   |   |     |    |   |   |   |   |
| 26 |          |   |   |     |    |   |   |   |   |
| 27 |          |   |   |     |    |   |   |   |   |
| 28 |          |   |   |     |    |   |   |   |   |
| 29 |          |   |   |     |    |   |   |   |   |
| 30 |          |   |   |     |    |   |   |   |   |
| 31 |          |   |   |     |    |   |   |   |   |
| 32 |          |   |   |     |    |   |   |   |   |
| 33 |          |   |   |     |    |   |   |   |   |
| 34 |          |   |   |     |    |   |   |   |   |
| 35 |          |   |   |     |    |   |   |   |   |
| 36 |          |   |   |     |    |   |   |   |   |
| 37 |          |   |   |     |    |   |   |   |   |
| 38 |          |   |   |     |    |   |   |   |   |
| 39 |          |   |   |     |    |   |   |   |   |
| 40 |          |   |   |     |    |   |   |   |   |
| 41 |          |   |   |     |    |   |   |   |   |
| 42 |          |   |   |     |    |   |   |   |   |
| 43 |          |   |   |     |    |   |   |   |   |
| 44 |          |   |   |     |    |   |   |   |   |
| 45 |          |   |   |     |    |   |   |   |   |
| 46 |          |   |   |     |    |   |   |   |   |
| 47 |          |   |   |     |    |   |   |   |   |
| 48 |          |   |   |     |    |   |   |   |   |
| 49 |          |   |   |     |    |   |   |   |   |
| 50 |          |   |   |     |    |   |   |   |   |
| 51 |          |   |   |     |    |   |   |   |   |
| 52 |          |   |   |     |    |   |   |   |   |
| 53 |          |   |   |     |    |   |   |   |   |
| 54 |          |   |   |     |    |   |   |   |   |
| 55 |          |   |   |     |    |   |   |   |   |
| 56 |          |   |   |     |    |   |   |   |   |
| 57 |          |   |   |     |    |   |   |   |   |
| 58 |          |   |   |     |    |   |   |   |   |
| 59 |          |   |   |     |    |   |   |   |   |
| 60 |          |   |   |     |    |   |   |   |   |

For peer review only



|    | 1_HO_traui_foot_care_self_foot_ε | HTN | Q53_DRetirQ54_DNep | PN | PAD | Deformity |
|----|----------------------------------|-----|--------------------|----|-----|-----------|
| 1  |                                  |     |                    |    |     |           |
| 2  |                                  |     |                    |    |     |           |
| 3  | 2                                | 1   | 2                  | 1  | 2   | 1         |
| 4  | 2                                | 1   | 1                  | 2  | 2   | 1         |
| 5  | 2                                | 1   | 2                  | 2  | 2   | 2         |
| 6  | 2                                | 1   | 1                  | 1  | 2   | 1         |
| 7  | 2                                | 1   | 1                  | 2  | 2   | 1         |
| 8  | 2                                | 1   | 1                  | 2  | 2   | 2         |
| 9  | 2                                | 1   | 1                  | 2  | 2   | 2         |
| 10 | 2                                | 1   | 2                  | 1  | 2   | 1         |
| 11 | 1                                | 1   | 2                  | 2  | 1   | 2         |
| 12 | 2                                | 1   | 1                  | 1  | 2   | 1         |
| 13 | 2                                | 1   | 1                  | 2  | 2   | 2         |
| 14 | 2                                | 1   | 1                  | 2  | 1   | 2         |
| 15 | 2                                | 1   | 1                  | 2  | 1   | 2         |
| 16 | 2                                | 1   | 2                  | 1  | 2   | 2         |
| 17 | 2                                | 1   | 2                  | 2  | 1   | 2         |
| 18 | 2                                | 1   | 1                  | 1  | 2   | 2         |
| 19 | 2                                | 1   | 2                  | 2  | 1   | 1         |
| 20 | 2                                | 1   | 2                  | 2  | 1   | 1         |
| 21 | 2                                | 1   | 1                  | 2  | 2   | 1         |
| 22 | 2                                | 2   | 2                  | 2  | 2   | 2         |
| 23 | 2                                | 1   | 2                  | 2  | 2   | 1         |
| 24 | 2                                | 1   | 2                  | 2  | 2   | 2         |
| 25 | 2                                | 1   | 2                  | 2  | 1   | 1         |
| 26 | 2                                | 1   | 2                  | 2  | 1   | 1         |
| 27 | 2                                | 1   | 2                  | 2  | 2   | 1         |
| 28 | 2                                | 1   | 2                  | 2  | 2   | 1         |
| 29 | 2                                | 2   | 2                  | 2  | 1   | 2         |
| 30 | 2                                | 1   | 1                  | 2  | 2   | 2         |
| 31 | 2                                | 1   | 1                  | 2  | 2   | 2         |
| 32 | 1                                | 1   | 1                  | 2  | 2   | 2         |
| 33 | 2                                | 1   | 1                  | 2  | 2   | 2         |
| 34 | 2                                | 2   | 2                  | 2  | 2   | 1         |
| 35 | 1                                | 1   | 1                  | 2  | 2   | 2         |
| 36 | 2                                | 1   | 1                  | 2  | 1   | 1         |
| 37 | 2                                | 2   | 2                  | 2  | 2   | 2         |
| 38 | 2                                | 1   | 1                  | 2  | 2   | 1         |
| 39 | 2                                | 1   | 2                  | 2  | 2   | 1         |
| 40 | 2                                | 1   | 2                  | 2  | 2   | 1         |
| 41 | 1                                | 1   | 1                  | 2  | 2   | 2         |
| 42 | 2                                | 2   | 2                  | 2  | 2   | 1         |
| 43 | 2                                | 1   | 1                  | 2  | 2   | 1         |
| 44 | 2                                | 1   | 2                  | 1  | 2   | 1         |
| 45 | 2                                | 1   | 2                  | 2  | 2   | 2         |
| 46 | 2                                | 1   | 2                  | 2  | 2   | 2         |
| 47 | 1                                | 2   | 2                  | 1  | 2   | 1         |
| 48 | 2                                | 1   | 1                  | 2  | 1   | 2         |
| 49 | 2                                | 1   | 2                  | 2  | 2   | 2         |
| 50 | 2                                | 1   | 2                  | 2  | 2   | 2         |
| 51 | 2                                | 1   | 2                  | 2  | 2   | 2         |
| 52 | 2                                | 1   | 2                  | 1  | 2   | 2         |
| 53 | 2                                | 1   | 1                  | 1  | 2   | 2         |
| 54 | 2                                | 1   | 2                  | 2  | 2   | 1         |
| 55 | 2                                | 1   | 1                  | 1  | 2   | 1         |
| 56 | 1                                | 1   | 2                  | 2  | 1   | 1         |
| 57 | 2                                | 1   | 1                  | 2  | 1   | 2         |
| 58 | 1                                | 1   | 2                  | 2  | 2   | 2         |
| 59 | 1                                | 1   | 2                  | 1  | 2   | 2         |
| 60 | 2                                | 1   | 2                  | 1  | 2   | 2         |

|    |   |   |   |   |   |   |   |   |   |
|----|---|---|---|---|---|---|---|---|---|
| 1  |   |   |   |   |   |   |   |   |   |
| 2  | 2 | 1 | 1 | 2 | 1 | 2 | 2 | 2 | 2 |
| 3  | 1 | 1 | 2 | 2 | 2 | 2 | 2 | 2 | 2 |
| 4  | 2 | 1 | 2 | 1 | 2 | 2 | 2 | 2 | 2 |
| 5  | 2 | 2 | 1 | 2 | 2 | 1 | 1 | 2 | 2 |
| 6  | 2 | 1 | 2 | 2 | 2 | 2 | 2 | 2 | 2 |
| 7  | 2 | 1 | 2 | 2 | 2 | 2 | 2 | 2 | 2 |
| 8  | 2 | 1 | 2 | 2 | 2 | 2 | 2 | 2 | 1 |
| 9  | 2 | 2 | 1 | 2 | 2 | 2 | 2 | 2 | 2 |
| 10 | 1 | 1 | 1 | 2 | 2 | 2 | 1 | 2 | 1 |
| 11 | 2 | 2 | 2 | 1 | 1 | 2 | 2 | 2 | 2 |
| 12 | 2 | 1 | 2 | 2 | 1 | 2 | 2 | 2 | 2 |
| 13 | 2 | 1 | 1 | 2 | 2 | 2 | 2 | 2 | 1 |
| 14 | 2 | 1 | 2 | 2 | 2 | 2 | 2 | 2 | 2 |
| 15 | 2 | 1 | 2 | 2 | 2 | 2 | 2 | 2 | 2 |
| 16 | 2 | 1 | 1 | 2 | 2 | 2 | 2 | 2 | 2 |
| 17 | 2 | 1 | 2 | 1 | 2 | 1 | 2 | 2 | 1 |
| 18 | 1 | 1 | 2 | 2 | 1 | 2 | 2 | 2 | 2 |
| 19 | 2 | 1 | 1 | 2 | 2 | 2 | 2 | 2 | 2 |
| 20 | 2 | 1 | 1 | 1 | 2 | 2 | 2 | 2 | 2 |
| 21 | 2 | 1 | 2 | 2 | 2 | 2 | 2 | 2 | 1 |
| 22 | 2 | 1 | 2 | 2 | 2 | 2 | 2 | 2 | 2 |
| 23 | 1 | 1 | 2 | 2 | 1 | 1 | 2 | 2 | 1 |
| 24 | 2 | 1 | 1 | 2 | 2 | 2 | 1 | 2 | 2 |
| 25 | 2 | 1 | 1 | 2 | 1 | 2 | 2 | 2 | 2 |
| 26 | 2 | 1 | 1 | 1 | 2 | 2 | 2 | 2 | 2 |
| 27 | 2 | 1 | 2 | 2 | 2 | 2 | 2 | 2 | 1 |
| 28 | 2 | 1 | 2 | 2 | 2 | 2 | 2 | 2 | 1 |
| 29 | 2 | 1 | 2 | 2 | 1 | 1 | 2 | 2 | 1 |
| 30 | 2 | 1 | 1 | 2 | 2 | 2 | 1 | 2 | 2 |
| 31 | 2 | 1 | 2 | 2 | 2 | 2 | 2 | 2 | 1 |
| 32 | 2 | 1 | 2 | 2 | 2 | 2 | 2 | 2 | 1 |
| 33 | 2 | 1 | 2 | 2 | 2 | 2 | 2 | 2 | 1 |
| 34 | 2 | 1 | 1 | 2 | 2 | 2 | 2 | 2 | 2 |
| 35 | 1 | 1 | 2 | 2 | 2 | 2 | 1 | 2 | 2 |
| 36 | 2 | 1 | 2 | 2 | 1 | 1 | 2 | 2 | 1 |
| 37 | 2 | 1 | 1 | 2 | 2 | 2 | 2 | 2 | 2 |
| 38 | 1 | 1 | 2 | 2 | 2 | 2 | 1 | 2 | 2 |
| 39 | 2 | 2 | 1 | 2 | 2 | 2 | 2 | 2 | 2 |
| 40 | 2 | 1 | 1 | 2 | 2 | 2 | 2 | 2 | 2 |
| 41 | 2 | 1 | 1 | 1 | 2 | 2 | 2 | 2 | 2 |
| 42 | 2 | 1 | 1 | 2 | 1 | 2 | 2 | 2 | 2 |
| 43 | 2 | 1 | 1 | 2 | 2 | 2 | 2 | 2 | 2 |
| 44 | 2 | 1 | 1 | 2 | 2 | 2 | 2 | 2 | 1 |
| 45 | 2 | 2 | 2 | 2 | 2 | 2 | 2 | 2 | 1 |
| 46 | 2 | 1 | 1 | 2 | 2 | 2 | 2 | 2 | 2 |
| 47 | 2 | 1 | 1 | 2 | 2 | 2 | 2 | 2 | 2 |
| 48 | 2 | 1 | 1 | 2 | 2 | 2 | 2 | 2 | 2 |
| 49 | 2 | 1 | 1 | 2 | 2 | 2 | 2 | 2 | 1 |
| 50 | 2 | 1 | 1 | 2 | 2 | 2 | 2 | 2 | 1 |
| 51 | 2 | 1 | 1 | 1 | 1 | 2 | 2 | 2 | 1 |
| 52 | 2 | 1 | 1 | 1 | 1 | 2 | 2 | 2 | 1 |
| 53 | 2 | 1 | 1 | 1 | 1 | 2 | 1 | 2 | 1 |
| 54 | 1 | 1 | 1 | 2 | 1 | 2 | 2 | 2 | 1 |
| 55 | 2 | 1 | 2 | 1 | 2 | 2 | 2 | 2 | 1 |
| 56 | 2 | 2 | 2 | 2 | 1 | 2 | 1 | 2 | 2 |
| 57 | 2 | 1 | 2 | 2 | 1 | 2 | 2 | 2 | 1 |
| 58 | 2 | 2 | 1 | 1 | 2 | 2 | 2 | 2 | 1 |
| 59 | 2 | 2 | 1 | 2 | 2 | 2 | 2 | 2 | 1 |
| 60 | 2 | 1 | 1 | 2 | 2 | 2 | 2 | 2 | 2 |

|    |   |   |   |   |   |   |   |   |   |
|----|---|---|---|---|---|---|---|---|---|
| 1  |   |   |   |   |   |   |   |   |   |
| 2  | 2 | 2 | 2 | 2 | 1 | 2 | 2 | 2 | 1 |
| 3  | 2 | 2 | 2 | 1 | 1 | 2 | 2 | 2 | 2 |
| 4  | 1 | 1 | 2 | 1 | 1 | 2 | 1 | 2 | 2 |
| 5  | 2 | 1 | 2 | 1 | 2 | 2 | 2 | 2 | 2 |
| 6  | 2 | 2 | 2 | 2 | 1 | 2 | 2 | 2 | 2 |
| 7  | 2 | 1 | 2 | 2 | 2 | 2 | 2 | 2 | 1 |
| 8  | 2 | 2 | 2 | 2 | 1 | 2 | 2 | 2 | 1 |
| 9  | 2 | 1 | 1 | 2 | 2 | 2 | 2 | 2 | 2 |
| 10 | 2 | 2 | 2 | 2 | 2 | 2 | 1 | 2 | 1 |
| 11 | 2 | 1 | 2 | 2 | 2 | 2 | 2 | 2 | 1 |
| 12 | 2 | 1 | 2 | 2 | 1 | 2 | 2 | 2 | 1 |
| 13 | 2 | 1 | 2 | 2 | 2 | 1 | 2 | 2 | 1 |
| 14 | 2 | 1 | 1 | 2 | 1 | 1 | 1 | 2 | 1 |
| 15 | 2 | 1 | 2 | 2 | 2 | 2 | 1 | 2 | 1 |
| 16 | 2 | 1 | 2 | 2 | 2 | 2 | 2 | 2 | 1 |
| 17 | 2 | 2 | 2 | 1 | 2 | 2 | 1 | 2 | 2 |
| 18 | 2 | 1 | 2 | 2 | 2 | 2 | 2 | 2 | 2 |
| 19 | 2 | 2 | 2 | 2 | 2 | 2 | 2 | 2 | 1 |
| 20 | 2 | 1 | 2 | 2 | 1 | 2 | 2 | 2 | 2 |
| 21 | 2 | 2 | 2 | 2 | 2 | 2 | 2 | 2 | 1 |
| 22 | 2 | 1 | 2 | 2 | 2 | 2 | 2 | 2 | 1 |
| 23 | 2 | 1 | 1 | 1 | 1 | 2 | 2 | 2 | 1 |
| 24 | 1 | 1 | 1 | 2 | 2 | 2 | 2 | 2 | 1 |
| 25 | 1 | 1 | 1 | 2 | 1 | 2 | 2 | 2 | 1 |
| 26 | 1 | 1 | 2 | 2 | 1 | 1 | 1 | 2 | 2 |
| 27 | 2 | 1 | 2 | 2 | 2 | 2 | 2 | 2 | 2 |
| 28 | 2 | 1 | 1 | 1 | 1 | 2 | 2 | 2 | 2 |
| 29 | 2 | 1 | 2 | 2 | 2 | 2 | 2 | 2 | 2 |
| 30 | 2 | 1 | 2 | 2 | 2 | 2 | 2 | 2 | 2 |
| 31 | 2 | 1 | 1 | 2 | 1 | 2 | 2 | 2 | 1 |
| 32 | 2 | 1 | 2 | 2 | 2 | 2 | 2 | 2 | 1 |
| 33 | 2 | 1 | 2 | 2 | 1 | 2 | 2 | 2 | 1 |
| 34 | 2 | 1 | 2 | 2 | 2 | 2 | 1 | 2 | 1 |
| 35 | 2 | 1 | 1 | 1 | 1 | 2 | 1 | 2 | 2 |
| 36 | 2 | 1 | 1 | 2 | 2 | 2 | 2 | 2 | 2 |
| 37 | 2 | 1 | 1 | 2 | 2 | 2 | 2 | 2 | 1 |
| 38 | 1 | 1 | 1 | 2 | 2 | 2 | 2 | 2 | 2 |
| 39 | 2 | 1 | 1 | 2 | 2 | 2 | 1 | 2 | 2 |
| 40 | 2 | 1 | 1 | 2 | 2 | 2 | 2 | 2 | 2 |
| 41 | 2 | 1 | 1 | 2 | 2 | 2 | 2 | 2 | 1 |
| 42 | 2 | 1 | 1 | 2 | 1 | 1 | 2 | 2 | 2 |
| 43 | 2 | 1 | 1 | 2 | 2 | 2 | 1 | 2 | 1 |
| 44 | 1 | 1 | 1 | 2 | 2 | 2 | 2 | 2 | 2 |
| 45 | 2 | 1 | 2 | 2 | 2 | 2 | 1 | 2 | 2 |
| 46 | 2 | 1 | 1 | 1 | 1 | 1 | 2 | 2 | 2 |
| 47 | 2 | 1 | 2 | 1 | 2 | 2 | 2 | 2 | 2 |
| 48 | 2 | 1 | 2 | 2 | 2 | 2 | 2 | 2 | 1 |
| 49 | 2 | 1 | 2 | 2 | 2 | 2 | 2 | 2 | 2 |
| 50 | 2 | 1 | 2 | 2 | 2 | 2 | 2 | 2 | 1 |
| 51 | 2 | 1 | 2 | 2 | 2 | 2 | 2 | 2 | 2 |
| 52 | 2 | 1 | 2 | 2 | 2 | 2 | 1 | 2 | 1 |
| 53 | 2 | 1 | 1 | 2 | 1 | 1 | 2 | 2 | 2 |
| 54 | 2 | 1 | 2 | 2 | 2 | 2 | 1 | 2 | 2 |
| 55 | 2 | 1 | 2 | 1 | 1 | 2 | 2 | 2 | 1 |
| 56 | 2 | 1 | 1 | 2 | 2 | 2 | 1 | 2 | 2 |
| 57 | 2 | 1 | 2 | 2 | 2 | 2 | 2 | 2 | 1 |
| 58 | 2 | 1 | 1 | 2 | 2 | 2 | 2 | 2 | 1 |
| 59 | 2 | 1 | 1 | 2 | 1 | 2 | 2 | 2 | 1 |
| 60 | 2 | 1 | 2 | 2 | 2 | 2 | 2 | 2 | 2 |

|    |   |   |   |   |   |   |   |   |   |
|----|---|---|---|---|---|---|---|---|---|
| 1  |   |   |   |   |   |   |   |   |   |
| 2  | 2 | 1 | 2 | 1 | 2 | 1 | 2 | 2 | 1 |
| 3  | 2 | 1 | 2 | 2 | 2 | 2 | 2 | 2 | 1 |
| 4  | 2 | 1 | 2 | 2 | 2 | 2 | 2 | 2 | 1 |
| 5  | 2 | 1 | 2 | 2 | 1 | 2 | 2 | 2 | 1 |
| 6  | 2 | 1 | 2 | 1 | 2 | 2 | 1 | 2 | 1 |
| 7  | 2 | 1 | 2 | 1 | 2 | 1 | 2 | 2 | 1 |
| 8  | 2 | 1 | 2 | 2 | 2 | 2 | 1 | 2 | 1 |
| 9  | 2 | 1 | 2 | 2 | 2 | 2 | 2 | 1 | 2 |
| 10 | 2 | 1 | 2 | 2 | 2 | 2 | 1 | 2 | 1 |
| 11 | 2 | 1 | 2 | 1 | 2 | 2 | 2 | 2 | 1 |
| 12 | 2 | 1 | 1 | 2 | 2 | 2 | 2 | 2 | 1 |
| 13 | 2 | 1 | 2 | 2 | 2 | 2 | 1 | 2 | 1 |
| 14 | 2 | 1 | 1 | 2 | 2 | 2 | 2 | 2 | 1 |
| 15 | 2 | 1 | 2 | 2 | 2 | 2 | 2 | 2 | 1 |
| 16 | 2 | 1 | 2 | 1 | 2 | 2 | 2 | 2 | 1 |
| 17 | 2 | 1 | 1 | 2 | 2 | 2 | 2 | 2 | 1 |
| 18 | 2 | 1 | 1 | 1 | 1 | 2 | 2 | 2 | 2 |
| 19 | 2 | 1 | 2 | 2 | 2 | 2 | 2 | 2 | 1 |
| 20 | 2 | 1 | 2 | 1 | 2 | 2 | 2 | 2 | 1 |
| 21 | 2 | 1 | 2 | 2 | 2 | 2 | 2 | 2 | 1 |
| 22 | 2 | 1 | 2 | 2 | 2 | 2 | 1 | 2 | 1 |
| 23 | 2 | 2 | 2 | 2 | 1 | 2 | 2 | 2 | 1 |
| 24 | 2 | 1 | 2 | 1 | 2 | 2 | 1 | 2 | 1 |
| 25 | 2 | 1 | 2 | 2 | 2 | 2 | 2 | 2 | 1 |
| 26 | 2 | 1 | 2 | 2 | 2 | 2 | 2 | 2 | 1 |
| 27 | 2 | 1 | 1 | 1 | 2 | 2 | 2 | 2 | 2 |
| 28 | 2 | 1 | 2 | 2 | 2 | 1 | 2 | 2 | 1 |
| 29 | 2 | 1 | 1 | 1 | 2 | 2 | 2 | 2 | 1 |
| 30 | 1 | 1 | 2 | 2 | 2 | 2 | 2 | 2 | 1 |
| 31 | 2 | 2 | 2 | 1 | 1 | 2 | 1 | 2 | 1 |
| 32 | 2 | 1 | 2 | 2 | 1 | 2 | 2 | 2 | 1 |
| 33 | 2 | 1 | 2 | 2 | 2 | 2 | 2 | 2 | 1 |
| 34 | 2 | 1 | 2 | 2 | 2 | 2 | 2 | 2 | 1 |
| 35 | 1 | 1 | 2 | 2 | 2 | 2 | 2 | 2 | 1 |
| 36 | 2 | 1 | 1 | 2 | 2 | 1 | 2 | 2 | 1 |
| 37 | 2 | 1 | 2 | 2 | 2 | 2 | 2 | 2 | 1 |
| 38 | 2 | 1 | 1 | 1 | 1 | 2 | 2 | 2 | 1 |
| 39 | 1 | 1 | 1 | 2 | 2 | 2 | 2 | 2 | 1 |
| 40 | 2 | 1 | 2 | 2 | 2 | 2 | 2 | 2 | 1 |
| 41 | 2 | 1 | 2 | 2 | 2 | 2 | 2 | 2 | 1 |
| 42 | 2 | 1 | 2 | 2 | 2 | 2 | 1 | 2 | 1 |
| 43 | 2 | 1 | 2 | 2 | 1 | 2 | 2 | 2 | 1 |
| 44 | 1 | 1 | 1 | 2 | 2 | 2 | 2 | 2 | 1 |
| 45 | 1 | 2 | 2 | 2 | 2 | 2 | 2 | 2 | 1 |
| 46 | 2 | 1 | 2 | 2 | 1 | 2 | 1 | 2 | 2 |
| 47 | 2 | 1 | 1 | 2 | 2 | 2 | 2 | 2 | 1 |
| 48 | 1 | 2 | 2 | 2 | 2 | 2 | 1 | 2 | 1 |
| 49 | 2 | 1 | 2 | 2 | 2 | 2 | 2 | 2 | 1 |
| 50 | 2 | 1 | 2 | 1 | 2 | 2 | 2 | 2 | 1 |
| 51 | 2 | 1 | 2 | 2 | 2 | 2 | 2 | 2 | 1 |
| 52 | 2 | 1 | 1 | 2 | 2 | 2 | 2 | 2 | 1 |
| 53 | 2 | 1 | 1 | 2 | 2 | 2 | 2 | 2 | 1 |
| 54 | 2 | 1 | 1 | 2 | 2 | 2 | 2 | 2 | 2 |
| 55 | 2 | 1 | 1 | 2 | 2 | 2 | 2 | 2 | 2 |
| 56 | 2 | 1 | 2 | 2 | 2 | 2 | 2 | 2 | 1 |
| 57 | 2 | 1 | 2 | 2 | 2 | 2 | 2 | 2 | 2 |
| 58 | 2 | 1 | 1 | 2 | 1 | 2 | 2 | 2 | 1 |
| 59 | 2 | 2 | 2 | 2 | 2 | 2 | 2 | 2 | 1 |
| 60 | 2 | 2 | 2 | 2 | 2 | 2 | 2 | 2 | 1 |

|    |   |   |   |   |   |   |   |   |   |
|----|---|---|---|---|---|---|---|---|---|
| 1  |   |   |   |   |   |   |   |   |   |
| 2  | 2 | 1 | 2 | 2 | 2 | 1 | 1 | 2 | 1 |
| 3  | 2 | 1 | 1 | 2 | 2 | 1 | 2 | 2 | 2 |
| 4  | 1 | 2 | 1 | 2 | 1 | 1 | 2 | 2 | 1 |
| 5  | 1 | 2 | 1 | 2 | 2 | 1 | 2 | 2 | 1 |
| 6  | 2 | 1 | 2 | 2 | 2 | 2 | 1 | 2 | 1 |
| 7  | 2 | 1 | 2 | 2 | 2 | 1 | 1 | 2 | 1 |
| 8  | 2 | 1 | 1 | 2 | 2 | 2 | 2 | 2 | 1 |
| 9  | 2 | 1 | 1 | 2 | 2 | 2 | 2 | 2 | 1 |
| 10 | 2 | 1 | 2 | 2 | 1 | 1 | 2 | 2 | 1 |
| 11 | 2 | 1 | 1 | 2 | 1 | 2 | 2 | 2 | 1 |
| 12 | 2 | 1 | 1 | 2 | 2 | 2 | 1 | 2 | 1 |
| 13 | 1 | 2 | 1 | 2 | 2 | 2 | 2 | 2 | 1 |
| 14 | 2 | 1 | 2 | 2 | 2 | 2 | 2 | 2 | 2 |
| 15 | 2 | 1 | 2 | 2 | 2 | 2 | 2 | 2 | 2 |
| 16 | 2 | 1 | 2 | 1 | 2 | 2 | 2 | 2 | 1 |
| 17 | 2 | 1 | 1 | 2 | 2 | 2 | 1 | 2 | 1 |
| 18 | 2 | 1 | 2 | 2 | 2 | 2 | 2 | 2 | 1 |
| 19 | 2 | 1 | 2 | 2 | 2 | 2 | 2 | 2 | 1 |
| 20 | 1 | 1 | 1 | 2 | 2 | 2 | 1 | 2 | 2 |
| 21 | 2 | 2 | 2 | 2 | 2 | 2 | 2 | 2 | 1 |
| 22 | 2 | 1 | 1 | 1 | 1 | 2 | 1 | 2 | 1 |
| 23 | 2 | 1 | 1 | 2 | 1 | 2 | 2 | 2 | 1 |
| 24 | 2 | 2 | 2 | 2 | 2 | 2 | 2 | 2 | 1 |
| 25 | 2 | 2 | 2 | 2 | 2 | 2 | 2 | 2 | 2 |
| 26 | 2 | 2 | 2 | 2 | 2 | 2 | 2 | 2 | 2 |
| 27 | 1 | 1 | 2 | 2 | 2 | 2 | 2 | 2 | 2 |
| 28 | 2 | 1 | 2 | 2 | 2 | 2 | 1 | 2 | 2 |
| 29 | 2 | 1 | 2 | 2 | 2 | 2 | 1 | 2 | 1 |
| 30 | 1 | 1 | 1 | 2 | 2 | 2 | 2 | 2 | 1 |
| 31 | 2 | 2 | 2 | 1 | 2 | 2 | 2 | 2 | 2 |
| 32 | 1 | 1 | 2 | 2 | 2 | 2 | 1 | 2 | 1 |
| 33 | 2 | 2 | 2 | 2 | 2 | 2 | 1 | 2 | 1 |
| 34 | 2 | 1 | 1 | 2 | 2 | 2 | 2 | 2 | 1 |
| 35 | 2 | 1 | 2 | 2 | 2 | 2 | 2 | 2 | 1 |
| 36 | 2 | 1 | 2 | 2 | 2 | 2 | 2 | 2 | 1 |
| 37 | 1 | 1 | 2 | 2 | 2 | 2 | 2 | 2 | 1 |
| 38 | 2 | 2 | 2 | 2 | 2 | 2 | 2 | 2 | 1 |
| 39 | 2 | 1 | 2 | 2 | 2 | 2 | 2 | 2 | 1 |
| 40 | 1 | 1 | 2 | 2 | 2 | 2 | 2 | 2 | 1 |
| 41 | 1 | 1 | 2 | 2 | 2 | 2 | 2 | 2 | 1 |
| 42 | 1 | 1 | 2 | 2 | 2 | 2 | 2 | 2 | 1 |
| 43 | 2 | 1 | 2 | 2 | 2 | 2 | 2 | 2 | 2 |
| 44 | 2 | 1 | 2 | 2 | 2 | 2 | 2 | 2 | 2 |
| 45 | 1 | 1 | 2 | 2 | 2 | 2 | 2 | 2 | 1 |
| 46 | 2 | 1 | 2 | 2 | 2 | 2 | 2 | 2 | 1 |
| 47 | 2 | 1 | 2 | 2 | 2 | 2 | 2 | 2 | 1 |
| 48 | 2 | 1 | 1 | 2 | 2 | 2 | 2 | 2 | 1 |
| 49 | 1 | 1 | 2 | 2 | 2 | 2 | 2 | 2 | 2 |
| 50 | 1 | 1 | 1 | 2 | 2 | 2 | 2 | 2 | 1 |
| 51 | 2 | 1 | 1 | 1 | 2 | 2 | 2 | 2 | 1 |
| 52 | 2 | 1 | 1 | 2 | 2 | 2 | 2 | 2 | 1 |
| 53 | 2 | 1 | 1 | 2 | 2 | 2 | 2 | 2 | 1 |
| 54 | 2 | 1 | 2 | 2 | 2 | 2 | 2 | 2 | 2 |
| 55 | 1 | 1 | 2 | 2 | 2 | 2 | 2 | 2 | 1 |
| 56 | 2 | 1 | 2 | 2 | 2 | 2 | 2 | 2 | 1 |
| 57 | 2 | 1 | 2 | 2 | 2 | 2 | 2 | 2 | 1 |
| 58 | 2 | 1 | 2 | 2 | 2 | 2 | 2 | 2 | 1 |
| 59 | 2 | 1 | 2 | 2 | 2 | 2 | 2 | 2 | 2 |
| 60 | 2 | 1 | 2 | 2 | 1 | 2 | 2 | 2 | 1 |

|    |   |   |   |   |   |   |   |   |   |
|----|---|---|---|---|---|---|---|---|---|
| 1  |   |   |   |   |   |   |   |   |   |
| 2  | 1 | 1 | 1 | 2 | 1 | 2 | 2 | 2 | 1 |
| 3  | 2 | 1 | 1 | 2 | 2 | 2 | 2 | 2 | 1 |
| 4  | 1 | 2 | 1 | 2 | 2 | 2 | 1 | 2 | 1 |
| 5  | 1 | 1 | 2 | 2 | 2 | 2 | 2 | 2 | 1 |
| 6  | 2 | 1 | 1 | 1 | 2 | 2 | 2 | 2 | 1 |
| 7  | 2 | 1 | 1 | 2 | 2 | 2 | 2 | 2 | 1 |
| 8  | 2 | 1 | 2 | 2 | 2 | 2 | 1 | 2 | 1 |
| 9  | 1 | 1 | 1 | 2 | 2 | 2 | 2 | 2 | 1 |
| 10 | 2 | 2 | 2 | 2 | 2 | 2 | 2 | 2 | 1 |
| 11 | 2 | 1 | 1 | 1 | 1 | 2 | 2 | 2 | 1 |
| 12 | 1 | 1 | 1 | 2 | 1 | 2 | 2 | 2 | 1 |
| 13 | 2 | 1 | 1 | 2 | 2 | 2 | 2 | 2 | 1 |
| 14 | 1 | 2 | 1 | 2 | 2 | 2 | 2 | 2 | 1 |
| 15 | 2 | 1 | 1 | 2 | 2 | 2 | 2 | 2 | 1 |
| 16 | 1 | 2 | 1 | 2 | 2 | 2 | 2 | 2 | 1 |
| 17 | 2 | 1 | 2 | 2 | 2 | 2 | 1 | 2 | 1 |
| 18 | 2 | 1 | 1 | 1 | 2 | 2 | 2 | 2 | 1 |
| 19 | 2 | 1 | 1 | 2 | 2 | 2 | 2 | 2 | 1 |
| 20 | 2 | 1 | 2 | 2 | 2 | 2 | 2 | 2 | 1 |
| 21 | 1 | 1 | 1 | 2 | 2 | 2 | 2 | 2 | 1 |
| 22 | 2 | 2 | 2 | 2 | 2 | 2 | 1 | 2 | 1 |
| 23 | 2 | 1 | 1 | 1 | 1 | 2 | 1 | 2 | 1 |
| 24 | 2 | 1 | 1 | 2 | 1 | 2 | 2 | 2 | 1 |
| 25 | 2 | 1 | 1 | 2 | 2 | 2 | 2 | 2 | 1 |
| 26 | 2 | 1 | 2 | 2 | 2 | 2 | 2 | 2 | 1 |
| 27 | 2 | 1 | 2 | 2 | 2 | 2 | 2 | 2 | 1 |
| 28 | 2 | 1 | 2 | 2 | 2 | 2 | 2 | 2 | 1 |
| 29 | 2 | 1 | 2 | 2 | 2 | 2 | 2 | 2 | 1 |
| 30 | 2 | 1 | 2 | 1 | 2 | 2 | 2 | 2 | 2 |
| 31 | 1 | 1 | 2 | 2 | 2 | 2 | 2 | 2 | 1 |
| 32 | 2 | 2 | 2 | 1 | 2 | 1 | 2 | 2 | 1 |
| 33 | 2 | 1 | 2 | 2 | 2 | 2 | 2 | 2 | 1 |
| 34 | 1 | 1 | 2 | 2 | 2 | 2 | 2 | 2 | 1 |
| 35 | 2 | 1 | 2 | 2 | 2 | 2 | 2 | 2 | 1 |
| 36 | 2 | 1 | 2 | 2 | 2 | 2 | 2 | 2 | 1 |
| 37 | 1 | 1 | 1 | 1 | 2 | 2 | 2 | 2 | 1 |
| 38 | 1 | 1 | 1 | 1 | 2 | 2 | 2 | 2 | 1 |
| 39 | 2 | 1 | 2 | 2 | 2 | 1 | 1 | 2 | 1 |
| 40 | 2 | 1 | 1 | 2 | 2 | 2 | 2 | 2 | 2 |
| 41 | 2 | 1 | 1 | 1 | 2 | 2 | 2 | 2 | 1 |
| 42 | 2 | 1 | 1 | 2 | 2 | 2 | 2 | 2 | 1 |
| 43 | 2 | 1 | 1 | 2 | 2 | 2 | 2 | 2 | 1 |
| 44 | 2 | 1 | 1 | 1 | 2 | 2 | 2 | 2 | 2 |
| 45 | 1 | 1 | 2 | 2 | 2 | 2 | 2 | 2 | 1 |
| 46 | 2 | 1 | 1 | 2 | 2 | 1 | 2 | 2 | 1 |
| 47 | 1 | 2 | 1 | 2 | 1 | 1 | 2 | 2 | 1 |
| 48 | 1 | 2 | 1 | 2 | 2 | 1 | 2 | 2 | 1 |
| 49 | 2 | 1 | 2 | 2 | 2 | 2 | 2 | 2 | 1 |
| 50 | 2 | 1 | 2 | 2 | 1 | 1 | 2 | 2 | 1 |
| 51 | 2 | 1 | 2 | 2 | 2 | 2 | 2 | 2 | 1 |
| 52 | 2 | 1 | 1 | 2 | 2 | 2 | 2 | 2 | 2 |
| 53 | 2 | 1 | 2 | 2 | 1 | 1 | 2 | 2 | 2 |
| 54 | 2 | 1 | 1 | 2 | 2 | 2 | 2 | 2 | 1 |
| 55 | 2 | 1 | 1 | 2 | 2 | 2 | 2 | 2 | 1 |
| 56 | 1 | 2 | 1 | 2 | 2 | 2 | 1 | 2 | 1 |
| 57 | 2 | 1 | 2 | 2 | 2 | 2 | 2 | 2 | 1 |
| 58 | 2 | 1 | 2 | 2 | 2 | 2 | 2 | 2 | 1 |
| 59 | 2 | 1 | 2 | 2 | 2 | 2 | 2 | 2 | 1 |
| 60 | 2 | 1 | 1 | 1 | 2 | 2 | 2 | 2 | 1 |

|    |   |   |   |   |   |   |   |   |   |
|----|---|---|---|---|---|---|---|---|---|
| 1  |   |   |   |   |   |   |   |   |   |
| 2  | 2 | 1 | 1 | 2 | 2 | 2 | 2 | 2 | 2 |
| 3  | 1 | 1 | 1 | 2 | 1 | 1 | 2 | 2 | 1 |
| 4  | 2 | 1 | 1 | 2 | 2 | 2 | 2 | 2 | 2 |
| 5  | 2 | 2 | 1 | 2 | 1 | 1 | 1 | 2 | 1 |
| 6  | 2 | 1 | 1 | 2 | 1 | 2 | 1 | 2 | 1 |
| 7  | 2 | 1 | 2 | 1 | 2 | 2 | 2 | 2 | 1 |
| 8  | 1 | 1 | 1 | 2 | 2 | 2 | 2 | 2 | 1 |
| 9  | 1 | 1 | 2 | 2 | 2 | 2 | 1 | 2 | 1 |
| 10 | 1 | 1 | 1 | 1 | 1 | 2 | 2 | 2 | 1 |
| 11 | 1 | 1 | 1 | 1 | 1 | 2 | 2 | 2 | 1 |
| 12 | 2 | 1 | 1 | 2 | 1 | 2 | 2 | 2 | 1 |
| 13 | 2 | 1 | 1 | 2 | 1 | 2 | 2 | 2 | 2 |
| 14 | 2 | 1 | 1 | 2 | 1 | 2 | 2 | 2 | 1 |
| 15 | 2 | 1 | 1 | 2 | 1 | 2 | 2 | 2 | 1 |
| 16 | 2 | 1 | 2 | 2 | 2 | 2 | 2 | 2 | 1 |
| 17 | 1 | 1 | 1 | 2 | 1 | 2 | 2 | 2 | 1 |
| 18 | 2 | 1 | 1 | 2 | 2 | 2 | 1 | 2 | 1 |
| 19 | 2 | 1 | 1 | 2 | 2 | 2 | 2 | 2 | 1 |
| 20 | 2 | 1 | 1 | 2 | 2 | 2 | 2 | 2 | 1 |
| 21 | 2 | 1 | 2 | 2 | 2 | 2 | 2 | 2 | 1 |
| 22 | 2 | 1 | 1 | 1 | 2 | 2 | 2 | 2 | 1 |
| 23 | 2 | 2 | 2 | 1 | 2 | 2 | 2 | 2 | 1 |
| 24 | 2 | 1 | 2 | 1 | 2 | 2 | 2 | 2 | 1 |
| 25 | 2 | 1 | 1 | 2 | 1 | 2 | 1 | 2 | 1 |
| 26 | 2 | 1 | 1 | 2 | 1 | 2 | 2 | 2 | 1 |
| 27 | 2 | 1 | 1 | 2 | 1 | 2 | 2 | 2 | 2 |
| 28 | 2 | 1 | 2 | 2 | 2 | 2 | 2 | 2 | 2 |
| 29 | 2 | 1 | 1 | 2 | 2 | 2 | 1 | 2 | 2 |
| 30 | 2 | 1 | 1 | 2 | 2 | 2 | 2 | 2 | 1 |
| 31 | 2 | 1 | 1 | 1 | 1 | 2 | 1 | 2 | 1 |
| 32 | 2 | 1 | 1 | 2 | 1 | 2 | 2 | 2 | 1 |
| 33 | 2 | 1 | 1 | 1 | 1 | 2 | 1 | 2 | 1 |
| 34 | 2 | 1 | 1 | 2 | 1 | 2 | 2 | 2 | 1 |
| 35 | 2 | 1 | 1 | 2 | 1 | 2 | 2 | 2 | 2 |
| 36 | 2 | 1 | 1 | 2 | 2 | 2 | 1 | 2 | 1 |
| 37 | 2 | 1 | 2 | 1 | 2 | 2 | 1 | 2 | 1 |
| 38 | 1 | 1 | 1 | 2 | 2 | 2 | 2 | 2 | 1 |
| 39 | 2 | 1 | 1 | 2 | 2 | 1 | 2 | 2 | 2 |
| 40 | 2 | 1 | 1 | 2 | 2 | 2 | 2 | 2 | 1 |
| 41 | 2 | 1 | 1 | 2 | 2 | 2 | 2 | 2 | 1 |
| 42 | 2 | 1 | 1 | 2 | 2 | 2 | 2 | 2 | 1 |
| 43 | 2 | 1 | 1 | 2 | 2 | 2 | 2 | 2 | 1 |
| 44 | 2 | 1 | 1 | 2 | 2 | 2 | 2 | 2 | 1 |
| 45 | 2 | 1 | 1 | 2 | 2 | 2 | 2 | 2 | 1 |
| 46 | 2 | 1 | 1 | 2 | 2 | 2 | 2 | 2 | 1 |
| 47 | 1 | 1 | 1 | 2 | 2 | 2 | 2 | 2 | 2 |
| 48 | 2 | 1 | 1 | 2 | 2 | 2 | 1 | 2 | 1 |
| 49 | 2 | 1 | 2 | 2 | 2 | 2 | 2 | 2 | 1 |
| 50 | 2 | 1 | 1 | 2 | 2 | 2 | 2 | 2 | 2 |
| 51 | 2 | 1 | 2 | 2 | 2 | 2 | 1 | 2 | 1 |
| 52 | 2 | 1 | 1 | 2 | 1 | 2 | 1 | 2 | 1 |
| 53 | 2 | 1 | 1 | 2 | 2 | 2 | 2 | 2 | 1 |
| 54 | 2 | 1 | 1 | 2 | 2 | 2 | 2 | 2 | 1 |
| 55 | 2 | 1 | 2 | 1 | 2 | 2 | 2 | 2 | 2 |
| 56 | 1 | 2 | 2 | 1 | 2 | 2 | 2 | 2 | 1 |
| 57 | 2 | 1 | 2 | 2 | 2 | 2 | 1 | 2 | 2 |
| 58 | 2 | 1 | 2 | 2 | 2 | 2 | 1 | 2 | 1 |
| 59 | 2 | 1 | 2 | 2 | 2 | 2 | 1 | 2 | 1 |
| 60 | 2 | 1 | 2 | 1 | 2 | 2 | 1 | 2 | 1 |

|    |   |   |   |   |   |   |   |   |   |
|----|---|---|---|---|---|---|---|---|---|
| 1  |   |   |   |   |   |   |   |   |   |
| 2  | 2 | 1 | 2 | 2 | 2 | 2 | 1 | 2 | 1 |
| 3  | 2 | 1 | 1 | 2 | 2 | 2 | 2 | 2 | 1 |
| 4  | 2 | 1 | 2 | 2 | 2 | 2 | 2 | 2 | 2 |
| 5  | 2 | 1 | 2 | 1 | 1 | 2 | 1 | 2 | 1 |
| 6  | 2 | 1 | 2 | 2 | 2 | 2 | 2 | 2 | 1 |
| 7  | 2 | 1 | 2 | 2 | 2 | 2 | 2 | 2 | 1 |
| 8  | 2 | 1 | 2 | 2 | 2 | 2 | 2 | 2 | 1 |
| 9  | 2 | 1 | 2 | 2 | 2 | 2 | 2 | 2 | 1 |
| 10 | 2 | 1 | 2 | 1 | 2 | 2 | 2 | 2 | 1 |
| 11 | 2 | 1 | 2 | 2 | 2 | 2 | 1 | 2 | 1 |
| 12 | 2 | 1 | 2 | 2 | 2 | 2 | 2 | 2 | 1 |
| 13 | 2 | 1 | 2 | 1 | 1 | 2 | 2 | 2 | 1 |
| 14 | 2 | 1 | 2 | 2 | 2 | 2 | 2 | 2 | 1 |
| 15 | 1 | 1 | 2 | 2 | 1 | 2 | 1 | 2 | 1 |
| 16 | 2 | 1 | 2 | 2 | 2 | 2 | 1 | 2 | 1 |
| 17 | 2 | 1 | 2 | 1 | 2 | 2 | 1 | 2 | 1 |
| 18 | 2 | 2 | 2 | 2 | 2 | 2 | 2 | 2 | 2 |
| 19 | 2 | 1 | 2 | 1 | 2 | 2 | 1 | 2 | 1 |
| 20 | 1 | 1 | 2 | 1 | 2 | 2 | 1 | 2 | 1 |
| 21 | 2 | 1 | 2 | 1 | 2 | 2 | 1 | 2 | 1 |
| 22 | 2 | 1 | 2 | 2 | 2 | 2 | 1 | 2 | 1 |
| 23 | 2 | 2 | 2 | 2 | 2 | 2 | 2 | 2 | 1 |
| 24 | 2 | 1 | 2 | 1 | 2 | 2 | 1 | 2 | 1 |
| 25 | 2 | 1 | 2 | 2 | 2 | 2 | 1 | 2 | 1 |
| 26 | 2 | 1 | 2 | 2 | 2 | 2 | 1 | 2 | 1 |
| 27 | 2 | 2 | 2 | 2 | 2 | 2 | 2 | 2 | 1 |
| 28 | 1 | 1 | 2 | 2 | 2 | 2 | 2 | 2 | 1 |
| 29 | 2 | 1 | 2 | 1 | 2 | 2 | 1 | 2 | 1 |
| 30 | 2 | 1 | 2 | 2 | 2 | 2 | 2 | 2 | 1 |
| 31 | 2 | 1 | 2 | 1 | 2 | 2 | 2 | 2 | 1 |
| 32 | 2 | 1 | 2 | 2 | 2 | 2 | 1 | 2 | 1 |
| 33 | 2 | 1 | 2 | 1 | 2 | 2 | 2 | 2 | 1 |
| 34 | 2 | 1 | 2 | 2 | 2 | 2 | 2 | 2 | 2 |
| 35 | 2 | 1 | 2 | 2 | 2 | 2 | 2 | 2 | 2 |
| 36 | 2 | 1 | 2 | 1 | 2 | 2 | 2 | 2 | 2 |
| 37 | 2 | 1 | 2 | 2 | 1 | 2 | 2 | 2 | 2 |
| 38 | 2 | 1 | 2 | 2 | 2 | 2 | 2 | 2 | 1 |
| 39 | 2 | 1 | 1 | 2 | 2 | 2 | 1 | 2 | 2 |
| 40 | 2 | 1 | 2 | 1 | 2 | 2 | 2 | 2 | 2 |
| 41 | 2 | 1 | 2 | 1 | 2 | 2 | 2 | 2 | 2 |
| 42 | 2 | 1 | 2 | 2 | 2 | 2 | 2 | 2 | 1 |
| 43 | 2 | 1 | 1 | 2 | 2 | 2 | 1 | 2 | 1 |
| 44 | 2 | 1 | 2 | 2 | 1 | 2 | 2 | 2 | 1 |
| 45 | 2 | 1 | 2 | 2 | 2 | 1 | 2 | 2 | 1 |
| 46 | 2 | 1 | 2 | 2 | 1 | 2 | 2 | 2 | 1 |
| 47 | 2 | 1 | 2 | 2 | 1 | 2 | 2 | 2 | 2 |
| 48 | 2 | 1 | 2 | 1 | 1 | 2 | 2 | 2 | 1 |
| 49 | 1 | 1 | 1 | 2 | 1 | 2 | 2 | 2 | 2 |
| 50 | 2 | 1 | 1 | 2 | 2 | 2 | 2 | 2 | 1 |
| 51 | 2 | 1 | 2 | 2 | 2 | 2 | 1 | 2 | 2 |
| 52 | 2 | 1 | 1 | 2 | 1 | 2 | 2 | 2 | 2 |
| 53 | 2 | 1 | 1 | 1 | 2 | 2 | 2 | 2 | 2 |
| 54 | 2 | 1 | 1 | 2 | 2 | 2 | 2 | 2 | 2 |
| 55 | 2 | 1 | 1 | 2 | 2 | 2 | 2 | 2 | 2 |
| 56 | 2 | 1 | 1 | 2 | 2 | 2 | 2 | 2 | 2 |
| 57 | 2 | 1 | 1 | 2 | 2 | 2 | 2 | 2 | 1 |
| 58 | 2 | 2 | 2 | 2 | 1 | 1 | 2 | 2 | 2 |
| 59 | 1 | 1 | 2 | 2 | 2 | 2 | 2 | 2 | 2 |
| 60 | 2 | 1 | 2 | 2 | 1 | 2 | 2 | 2 | 2 |



|    |   |   |   |   |   |   |   |   |   |
|----|---|---|---|---|---|---|---|---|---|
| 1  |   |   |   |   |   |   |   |   |   |
| 2  | 2 | 1 | 2 | 1 | 1 | 1 | 2 | 2 | 2 |
| 3  | 1 | 1 | 1 | 1 | 2 | 2 | 2 | 2 | 1 |
| 4  | 2 | 1 | 1 | 2 | 1 | 2 | 2 | 2 | 2 |
| 5  | 2 | 1 | 1 | 2 | 2 | 2 | 2 | 2 | 2 |
| 6  | 2 | 1 | 1 | 2 | 2 | 2 | 2 | 2 | 2 |
| 7  | 2 | 1 | 1 | 1 | 2 | 2 | 2 | 2 | 2 |
| 8  | 2 | 1 | 1 | 2 | 2 | 2 | 2 | 2 | 2 |
| 9  | 2 | 1 | 1 | 2 | 2 | 2 | 2 | 2 | 2 |
| 10 | 2 | 1 | 2 | 2 | 2 | 1 | 2 | 2 | 2 |
| 11 | 2 | 1 | 2 | 2 | 2 | 2 | 2 | 2 | 2 |
| 12 | 2 | 1 | 1 | 1 | 2 | 2 | 2 | 2 | 2 |
| 13 | 2 | 1 | 1 | 2 | 1 | 2 | 2 | 2 | 2 |
| 14 | 2 | 1 | 2 | 2 | 2 | 1 | 2 | 2 | 2 |
| 15 | 2 | 1 | 2 | 2 | 2 | 1 | 2 | 2 | 1 |
| 16 | 2 | 1 | 1 | 2 | 2 | 1 | 2 | 2 | 2 |
| 17 | 2 | 1 | 2 | 2 | 2 | 2 | 2 | 2 | 2 |
| 18 | 1 | 1 | 1 | 2 | 2 | 2 | 2 | 2 | 2 |
| 19 | 2 | 1 | 1 | 1 | 2 | 2 | 2 | 2 | 1 |
| 20 | 2 | 1 | 1 | 2 | 2 | 2 | 2 | 2 | 2 |
| 21 | 2 | 1 | 2 | 2 | 2 | 2 | 2 | 2 | 2 |
| 22 | 2 | 1 | 2 | 2 | 2 | 2 | 2 | 2 | 1 |
| 23 | 2 | 1 | 1 | 2 | 2 | 2 | 2 | 2 | 1 |
| 24 | 2 | 2 | 2 | 2 | 2 | 2 | 2 | 2 | 2 |
| 25 | 2 | 1 | 2 | 2 | 2 | 2 | 2 | 2 | 2 |
| 26 | 2 | 1 | 2 | 2 | 2 | 2 | 2 | 2 | 2 |
| 27 | 2 | 1 | 2 | 2 | 2 | 2 | 2 | 2 | 1 |
| 28 | 2 | 1 | 2 | 1 | 2 | 2 | 2 | 2 | 2 |
| 29 | 2 | 1 | 1 | 2 | 2 | 2 | 2 | 2 | 2 |
| 30 | 2 | 2 | 2 | 2 | 2 | 2 | 2 | 2 | 2 |
| 31 | 2 | 1 | 2 | 2 | 1 | 2 | 2 | 2 | 1 |
| 32 | 2 | 1 | 2 | 1 | 2 | 2 | 2 | 2 | 2 |
| 33 | 2 | 1 | 1 | 2 | 2 | 2 | 2 | 2 | 1 |
| 34 | 2 | 1 | 2 | 1 | 1 | 2 | 2 | 2 | 2 |
| 35 | 2 | 2 | 2 | 1 | 2 | 2 | 2 | 2 | 2 |
| 36 | 2 | 2 | 2 | 2 | 2 | 2 | 2 | 2 | 2 |
| 37 | 2 | 1 | 2 | 2 | 2 | 2 | 2 | 2 | 1 |
| 38 | 1 | 1 | 2 | 2 | 2 | 2 | 2 | 2 | 1 |
| 39 | 2 | 1 | 2 | 2 | 2 | 2 | 2 | 2 | 2 |
| 40 | 2 | 1 | 2 | 2 | 2 | 2 | 2 | 2 | 2 |
| 41 | 2 | 1 | 2 | 2 | 2 | 2 | 1 | 2 | 2 |
| 42 | 2 | 1 | 2 | 2 | 2 | 2 | 2 | 2 | 2 |
| 43 | 2 | 1 | 2 | 1 | 2 | 2 | 2 | 2 | 1 |
| 44 | 2 | 2 | 2 | 2 | 2 | 2 | 2 | 2 | 2 |
| 45 | 2 | 1 | 1 | 2 | 2 | 2 | 2 | 2 | 2 |
| 46 | 2 | 1 | 1 | 1 | 2 | 2 | 2 | 2 | 2 |
| 47 | 2 | 1 | 2 | 2 | 2 | 2 | 2 | 2 | 2 |
| 48 | 2 | 1 | 2 | 2 | 2 | 2 | 2 | 2 | 2 |
| 49 | 2 | 1 | 2 | 2 | 2 | 2 | 2 | 2 | 2 |
| 50 | 2 | 1 | 1 | 2 | 2 | 2 | 2 | 2 | 2 |
| 51 | 2 | 1 | 1 | 1 | 2 | 2 | 2 | 2 | 2 |
| 52 | 2 | 1 | 2 | 2 | 2 | 2 | 2 | 2 | 2 |
| 53 | 2 | 1 | 2 | 2 | 2 | 2 | 2 | 2 | 2 |
| 54 | 2 | 1 | 2 | 2 | 2 | 2 | 2 | 2 | 2 |
| 55 | 2 | 2 | 2 | 2 | 2 | 2 | 2 | 2 | 1 |
| 56 | 2 | 1 | 1 | 2 | 2 | 2 | 2 | 2 | 1 |
| 57 | 1 | 1 | 2 | 2 | 2 | 2 | 2 | 2 | 2 |
| 58 | 2 | 1 | 1 | 2 | 2 | 2 | 2 | 2 | 1 |
| 59 | 2 | 1 | 2 | 2 | 2 | 2 | 2 | 2 | 2 |
| 60 | 2 | 1 | 2 | 2 | 2 | 2 | 2 | 2 | 2 |

|    |   |   |   |   |   |   |   |   |   |
|----|---|---|---|---|---|---|---|---|---|
| 1  |   |   |   |   |   |   |   |   |   |
| 2  | 2 | 1 | 2 | 2 | 2 | 2 | 2 | 2 | 2 |
| 3  | 2 | 1 | 2 | 2 | 2 | 2 | 2 | 2 | 2 |
| 4  | 2 | 1 | 2 | 1 | 2 | 2 | 2 | 2 | 2 |
| 5  | 1 | 1 | 2 | 2 | 2 | 2 | 2 | 2 | 2 |
| 6  | 1 | 1 | 1 | 2 | 2 | 2 | 2 | 2 | 2 |
| 7  | 2 | 1 | 2 | 2 | 2 | 2 | 2 | 2 | 2 |
| 8  | 2 | 1 | 2 | 2 | 2 | 2 | 2 | 2 | 2 |
| 9  | 2 | 1 | 2 | 2 | 2 | 2 | 2 | 2 | 2 |
| 10 | 2 | 1 | 2 | 2 | 2 | 2 | 2 | 2 | 2 |
| 11 | 2 | 1 | 2 | 2 | 2 | 2 | 2 | 2 | 2 |
| 12 | 2 | 1 | 1 | 2 | 2 | 2 | 2 | 2 | 2 |
| 13 | 2 | 1 | 2 | 2 | 2 | 2 | 2 | 2 | 2 |
| 14 | 2 | 1 | 2 | 2 | 2 | 2 | 2 | 2 | 2 |
| 15 | 2 | 1 | 2 | 2 | 2 | 2 | 2 | 2 | 2 |
| 16 | 2 | 2 | 2 | 1 | 2 | 2 | 2 | 2 | 1 |
| 17 | 2 | 1 | 2 | 2 | 2 | 2 | 2 | 2 | 2 |
| 18 | 2 | 1 | 2 | 2 | 2 | 2 | 2 | 2 | 2 |
| 19 | 2 | 1 | 2 | 2 | 2 | 2 | 2 | 2 | 2 |
| 20 | 2 | 1 | 2 | 2 | 2 | 2 | 2 | 2 | 1 |
| 21 | 2 | 1 | 1 | 2 | 2 | 2 | 2 | 2 | 1 |
| 22 | 2 | 1 | 2 | 2 | 2 | 2 | 2 | 2 | 1 |
| 23 | 2 | 1 | 1 | 2 | 2 | 2 | 2 | 2 | 2 |
| 24 | 1 | 1 | 2 | 2 | 2 | 2 | 2 | 2 | 1 |
| 25 | 2 | 1 | 2 | 2 | 2 | 2 | 2 | 2 | 1 |
| 26 | 2 | 1 | 2 | 2 | 2 | 2 | 2 | 2 | 1 |
| 27 | 1 | 1 | 2 | 2 | 2 | 2 | 2 | 2 | 1 |
| 28 | 2 | 1 | 2 | 2 | 2 | 2 | 2 | 2 | 1 |
| 29 | 2 | 1 | 1 | 2 | 1 | 2 | 2 | 2 | 2 |
| 30 | 2 | 1 | 2 | 2 | 2 | 2 | 2 | 2 | 1 |
| 31 | 2 | 1 | 2 | 2 | 2 | 2 | 2 | 2 | 1 |
| 32 | 2 | 1 | 2 | 2 | 2 | 2 | 2 | 2 | 1 |
| 33 | 2 | 1 | 2 | 2 | 2 | 2 | 2 | 2 | 1 |
| 34 | 2 | 1 | 2 | 2 | 2 | 2 | 2 | 2 | 1 |
| 35 | 2 | 1 | 2 | 1 | 2 | 2 | 2 | 2 | 1 |
| 36 | 2 | 1 | 2 | 2 | 2 | 2 | 2 | 2 | 2 |
| 37 | 2 | 1 | 1 | 2 | 2 | 2 | 2 | 2 | 1 |
| 38 | 2 | 1 | 2 | 2 | 2 | 2 | 2 | 2 | 1 |
| 39 | 2 | 1 | 2 | 2 | 2 | 2 | 2 | 2 | 1 |
| 40 | 2 | 1 | 1 | 2 | 2 | 2 | 2 | 2 | 1 |
| 41 | 2 | 1 | 2 | 2 | 2 | 2 | 2 | 2 | 1 |
| 42 | 2 | 1 | 2 | 2 | 2 | 2 | 2 | 2 | 2 |
| 43 | 2 | 1 | 1 | 2 | 2 | 2 | 2 | 2 | 1 |
| 44 | 2 | 1 | 1 | 1 | 2 | 2 | 2 | 2 | 1 |
| 45 | 1 | 1 | 2 | 2 | 2 | 2 | 1 | 2 | 1 |
| 46 | 2 | 1 | 2 | 2 | 2 | 2 | 2 | 2 | 2 |
| 47 | 2 | 1 | 2 | 2 | 2 | 2 | 1 | 2 | 1 |
| 48 | 2 | 1 | 2 | 2 | 2 | 2 | 2 | 2 | 2 |
| 49 | 2 | 1 | 1 | 2 | 2 | 2 | 2 | 2 | 2 |
| 50 | 2 | 1 | 1 | 2 | 2 | 2 | 2 | 2 | 2 |
| 51 | 2 | 1 | 2 | 2 | 2 | 2 | 2 | 2 | 1 |
| 52 | 2 | 1 | 2 | 2 | 2 | 2 | 2 | 2 | 1 |
| 53 | 2 | 1 | 1 | 2 | 2 | 2 | 2 | 2 | 1 |
| 54 | 2 | 1 | 2 | 2 | 2 | 2 | 2 | 2 | 1 |
| 55 | 2 | 1 | 1 | 2 | 2 | 2 | 2 | 2 | 1 |
| 56 | 2 | 1 | 1 | 2 | 2 | 2 | 2 | 2 | 1 |
| 57 | 2 | 1 | 1 | 2 | 2 | 2 | 1 | 2 | 1 |
| 58 | 2 | 1 | 2 | 1 | 2 | 2 | 2 | 2 | 1 |
| 59 | 2 | 1 | 2 | 2 | 2 | 2 | 2 | 2 | 1 |
| 60 | 2 | 1 | 2 | 2 | 2 | 2 | 2 | 2 | 1 |

|    |   |   |   |   |   |   |   |   |   |
|----|---|---|---|---|---|---|---|---|---|
| 1  |   |   |   |   |   |   |   |   |   |
| 2  | 2 | 1 | 2 | 2 | 2 | 2 | 2 | 2 | 2 |
| 3  | 2 | 1 | 2 | 2 | 2 | 2 | 2 | 2 | 2 |
| 4  | 2 | 1 | 1 | 2 | 2 | 2 | 2 | 2 | 2 |
| 5  | 2 | 1 | 1 | 2 | 2 | 2 | 1 | 2 | 1 |
| 6  | 2 | 1 | 2 | 2 | 2 | 2 | 2 | 2 | 1 |
| 7  | 2 | 1 | 1 | 2 | 2 | 2 | 2 | 2 | 2 |
| 8  | 2 | 1 | 1 | 2 | 2 | 2 | 2 | 2 | 2 |
| 9  | 2 | 1 | 1 | 2 | 2 | 2 | 2 | 2 | 2 |
| 10 | 2 | 1 | 2 | 2 | 2 | 2 | 2 | 2 | 2 |
| 11 | 2 | 1 | 2 | 1 | 1 | 2 | 2 | 2 | 2 |
| 12 | 1 | 1 | 2 | 2 | 1 | 2 | 2 | 2 | 1 |
| 13 | 2 | 1 | 1 | 2 | 1 | 2 | 2 | 2 | 1 |
| 14 | 2 | 1 | 1 | 2 | 2 | 2 | 2 | 2 | 1 |
| 15 | 2 | 1 | 1 | 2 | 2 | 2 | 2 | 2 | 1 |
| 16 | 2 | 1 | 1 | 2 | 2 | 2 | 1 | 2 | 2 |
| 17 | 2 | 1 | 2 | 2 | 2 | 2 | 2 | 2 | 1 |
| 18 | 2 | 1 | 2 | 2 | 2 | 2 | 2 | 2 | 1 |
| 19 | 2 | 1 | 2 | 2 | 2 | 2 | 2 | 2 | 1 |
| 20 | 2 | 1 | 2 | 2 | 2 | 2 | 2 | 2 | 2 |
| 21 | 1 | 1 | 1 | 1 | 2 | 2 | 2 | 2 | 1 |
| 22 | 2 | 1 | 1 | 2 | 2 | 2 | 2 | 2 | 1 |
| 23 | 2 | 1 | 2 | 1 | 1 | 2 | 2 | 2 | 1 |
| 24 | 2 | 1 | 2 | 2 | 1 | 2 | 2 | 2 | 1 |
| 25 | 2 | 1 | 2 | 2 | 2 | 2 | 2 | 2 | 1 |
| 26 | 1 | 1 | 1 | 2 | 2 | 2 | 2 | 2 | 1 |
| 27 | 2 | 1 | 2 | 2 | 2 | 2 | 2 | 2 | 1 |
| 28 | 2 | 1 | 2 | 2 | 2 | 2 | 1 | 2 | 1 |
| 29 | 1 | 1 | 2 | 2 | 1 | 2 | 2 | 2 | 1 |
| 30 | 2 | 1 | 2 | 2 | 2 | 2 | 2 | 2 | 1 |
| 31 | 2 | 1 | 2 | 2 | 2 | 2 | 2 | 2 | 1 |
| 32 | 1 | 1 | 2 | 2 | 2 | 2 | 2 | 2 | 1 |
| 33 | 2 | 1 | 1 | 2 | 2 | 2 | 2 | 2 | 2 |
| 34 | 1 | 1 | 1 | 2 | 2 | 2 | 1 | 2 | 2 |
| 35 | 2 | 1 | 2 | 2 | 2 | 2 | 1 | 2 | 2 |
| 36 | 2 | 1 | 2 | 2 | 2 | 2 | 2 | 2 | 1 |
| 37 | 2 | 1 | 2 | 2 | 2 | 2 | 2 | 2 | 1 |
| 38 | 2 | 1 | 1 | 2 | 2 | 2 | 2 | 2 | 2 |
| 39 | 2 | 1 | 2 | 1 | 2 | 2 | 2 | 2 | 2 |
| 40 | 2 | 1 | 1 | 2 | 2 | 2 | 2 | 2 | 2 |
| 41 | 2 | 1 | 1 | 2 | 2 | 2 | 2 | 2 | 2 |
| 42 | 2 | 2 | 2 | 1 | 2 | 2 | 2 | 2 | 2 |
| 43 | 2 | 1 | 2 | 2 | 2 | 2 | 2 | 2 | 1 |
| 44 | 2 | 1 | 1 | 2 | 1 | 2 | 1 | 2 | 1 |
| 45 | 2 | 2 | 2 | 2 | 2 | 2 | 2 | 2 | 1 |
| 46 | 2 | 1 | 2 | 2 | 2 | 2 | 2 | 2 | 1 |
| 47 | 2 | 2 | 2 | 2 | 2 | 2 | 2 | 2 | 1 |
| 48 | 2 | 1 | 1 | 2 | 2 | 2 | 2 | 2 | 2 |
| 49 | 2 | 1 | 1 | 2 | 2 | 2 | 2 | 2 | 1 |
| 50 | 2 | 1 | 1 | 2 | 2 | 2 | 2 | 2 | 2 |
| 51 | 2 | 1 | 1 | 2 | 2 | 2 | 2 | 2 | 1 |
| 52 | 2 | 1 | 1 | 2 | 2 | 2 | 2 | 2 | 2 |
| 53 | 1 | 1 | 1 | 2 | 1 | 2 | 2 | 2 | 1 |
| 54 | 2 | 2 | 2 | 1 | 2 | 1 | 2 | 2 | 1 |
| 55 | 2 | 1 | 1 | 2 | 1 | 2 | 2 | 2 | 1 |
| 56 | 2 | 1 | 2 | 1 | 2 | 2 | 2 | 2 | 1 |
| 57 | 2 | 2 | 2 | 2 | 2 | 2 | 2 | 2 | 1 |
| 58 | 2 | 1 | 1 | 2 | 2 | 2 | 2 | 2 | 1 |
| 59 | 2 | 1 | 1 | 2 | 2 | 2 | 2 | 2 | 1 |
| 60 | 2 | 1 | 2 | 2 | 2 | 1 | 2 | 2 | 1 |

|    |   |   |   |   |   |   |   |   |   |
|----|---|---|---|---|---|---|---|---|---|
| 1  |   |   |   |   |   |   |   |   |   |
| 2  | 2 | 1 | 1 | 2 | 2 | 2 | 2 | 2 | 1 |
| 3  | 2 | 1 | 1 | 1 | 2 | 2 | 2 | 2 | 1 |
| 4  | 2 | 2 | 2 | 1 | 1 | 2 | 1 | 2 | 2 |
| 5  | 2 | 1 | 1 | 2 | 2 | 2 | 2 | 2 | 1 |
| 6  |   |   |   |   |   |   |   |   |   |
| 7  | 1 | 1 | 1 | 2 | 2 | 2 | 2 | 2 | 1 |
| 8  | 2 | 2 | 2 | 1 | 2 | 2 | 2 | 2 | 1 |
| 9  | 2 | 1 | 1 | 1 | 2 | 2 | 2 | 2 | 1 |
| 10 | 2 | 2 | 1 | 2 | 1 | 2 | 2 | 2 | 2 |
| 11 | 2 | 1 | 1 | 1 | 2 | 2 | 2 | 2 | 1 |
| 12 |   |   |   |   |   |   |   |   |   |
| 13 | 2 | 2 | 2 | 1 | 2 | 2 | 2 | 2 | 1 |
| 14 | 2 | 1 | 1 | 1 | 2 | 2 | 2 | 2 | 2 |
| 15 | 2 | 1 | 1 | 2 | 2 | 2 | 1 | 2 | 2 |
| 16 | 2 | 1 | 2 | 2 | 2 | 2 | 1 | 2 | 2 |
| 17 | 2 | 1 | 2 | 2 | 2 | 2 | 2 | 2 | 1 |
| 18 |   |   |   |   |   |   |   |   |   |
| 19 | 2 | 2 | 2 | 2 | 2 | 2 | 2 | 2 | 1 |
| 20 | 2 | 2 | 2 | 1 | 2 | 2 | 2 | 2 | 2 |
| 21 | 2 | 1 | 1 | 1 | 2 | 2 | 2 | 2 | 1 |
| 22 | 2 | 1 | 1 | 1 | 2 | 2 | 2 | 2 | 1 |
| 23 |   |   |   |   |   |   |   |   |   |
| 24 | 2 | 1 | 1 | 2 | 2 | 2 | 2 | 2 | 1 |
| 25 | 2 | 1 | 2 | 2 | 2 | 2 | 2 | 2 | 1 |
| 26 | 2 | 1 | 1 | 1 | 2 | 2 | 2 | 2 | 1 |
| 27 | 2 | 1 | 1 | 1 | 2 | 2 | 2 | 2 | 1 |
| 28 | 2 | 1 | 1 | 2 | 2 | 2 | 2 | 2 | 1 |
| 29 |   |   |   |   |   |   |   |   |   |
| 30 | 2 | 1 | 2 | 2 | 2 | 2 | 1 | 2 | 1 |
| 31 | 2 | 1 | 1 | 2 | 2 | 2 | 2 | 2 | 1 |
| 32 | 2 | 1 | 1 | 2 | 2 | 2 | 2 | 2 | 1 |
| 33 | 2 | 1 | 2 | 1 | 2 | 2 | 2 | 2 | 1 |
| 34 | 2 | 1 | 2 | 1 | 2 | 2 | 2 | 2 | 2 |
| 35 | 2 | 1 | 2 | 1 | 2 | 2 | 2 | 2 | 2 |
| 36 |   |   |   |   |   |   |   |   |   |
| 37 | 2 | 2 | 2 | 2 | 2 | 2 | 2 | 2 | 2 |
| 38 | 2 | 1 | 1 | 2 | 2 | 2 | 2 | 2 | 1 |
| 39 | 2 | 1 | 1 | 1 | 2 | 2 | 1 | 2 | 1 |
| 40 | 2 | 1 | 1 | 1 | 2 | 2 | 1 | 2 | 2 |
| 41 |   |   |   |   |   |   |   |   |   |
| 42 | 2 | 2 | 2 | 2 | 2 | 2 | 2 | 2 | 2 |
| 43 | 2 | 2 | 1 | 2 | 2 | 2 | 1 | 2 | 2 |
| 44 | 2 | 1 | 1 | 1 | 2 | 2 | 2 | 2 | 2 |
| 45 | 2 | 2 | 2 | 2 | 2 | 2 | 2 | 2 | 1 |
| 46 | 2 | 2 | 2 | 2 | 2 | 2 | 2 | 2 | 2 |
| 47 |   |   |   |   |   |   |   |   |   |
| 48 | 1 | 1 | 2 | 2 | 2 | 2 | 2 | 2 | 1 |
| 49 | 1 | 1 | 1 | 2 | 2 | 2 | 2 | 2 | 1 |
| 50 | 2 | 1 | 1 | 2 | 2 | 2 | 2 | 2 | 2 |
| 51 | 1 | 1 | 2 | 1 | 2 | 2 | 1 | 2 | 1 |
| 52 | 2 | 1 | 2 | 2 | 2 | 2 | 2 | 2 | 2 |
| 53 |   |   |   |   |   |   |   |   |   |
| 54 | 1 | 1 | 2 | 2 | 2 | 2 | 2 | 2 | 1 |
| 55 | 1 | 1 | 2 | 1 | 1 | 2 | 1 | 2 | 1 |
| 56 | 2 | 1 | 2 | 2 | 2 | 2 | 2 | 2 | 1 |
| 57 | 1 | 1 | 2 | 2 | 2 | 2 | 2 | 2 | 1 |
| 58 | 2 | 1 | 1 | 2 | 2 | 2 | 2 | 2 | 1 |
| 59 | 2 | 1 | 1 | 2 | 2 | 2 | 2 | 2 | 1 |
| 60 | 2 | 1 | 2 | 2 | 2 | 2 | 2 | 2 | 1 |

|    |   |   |   |   |   |   |   |   |   |
|----|---|---|---|---|---|---|---|---|---|
| 1  |   |   |   |   |   |   |   |   |   |
| 2  | 2 | 1 | 1 | 2 | 2 | 2 | 2 | 2 | 2 |
| 3  | 2 | 1 | 2 | 1 | 2 | 2 | 2 | 2 | 1 |
| 4  | 2 | 1 | 1 | 2 | 2 | 2 | 2 | 2 | 1 |
| 5  | 2 | 1 | 1 | 2 | 2 | 2 | 2 | 2 | 1 |
| 6  | 2 | 1 | 1 | 1 | 1 | 1 | 2 | 2 | 2 |
| 7  | 2 | 1 | 1 | 2 | 2 | 2 | 2 | 2 | 1 |
| 8  | 2 | 1 | 1 | 2 | 2 | 2 | 2 | 2 | 1 |
| 9  | 2 | 1 | 1 | 2 | 2 | 2 | 2 | 2 | 1 |
| 10 | 2 | 1 | 2 | 2 | 2 | 1 | 2 | 2 | 1 |
| 11 | 2 | 1 | 1 | 2 | 2 | 2 | 2 | 2 | 1 |
| 12 | 2 | 1 | 1 | 2 | 2 | 2 | 2 | 2 | 1 |
| 13 | 2 | 1 | 1 | 2 | 2 | 2 | 2 | 2 | 1 |
| 14 | 2 | 1 | 1 | 2 | 2 | 2 | 1 | 2 | 2 |
| 15 | 2 | 2 | 2 | 1 | 1 | 2 | 2 | 2 | 1 |
| 16 | 1 | 1 | 1 | 2 | 2 | 2 | 2 | 2 | 1 |
| 17 | 2 | 1 | 2 | 2 | 2 | 2 | 2 | 2 | 2 |
| 18 | 1 | 1 | 2 | 2 | 2 | 2 | 2 | 2 | 1 |
| 19 | 1 | 2 | 1 | 2 | 2 | 2 | 2 | 2 | 1 |
| 20 | 2 | 1 | 2 | 2 | 2 | 2 | 1 | 2 | 1 |
| 21 | 2 | 1 | 2 | 2 | 2 | 2 | 2 | 2 | 1 |
| 22 | 2 | 1 | 2 | 2 | 2 | 2 | 2 | 2 | 1 |
| 23 | 2 | 1 | 2 | 2 | 2 | 2 | 2 | 2 | 2 |
| 24 | 2 | 1 | 2 | 2 | 2 | 2 | 2 | 2 | 2 |
| 25 | 2 | 1 | 2 | 1 | 2 | 2 | 2 | 2 | 1 |
| 26 | 2 | 1 | 2 | 1 | 2 | 2 | 1 | 2 | 1 |
| 27 | 2 | 1 | 2 | 1 | 2 | 2 | 2 | 2 | 1 |
| 28 | 2 | 1 | 2 | 1 | 2 | 2 | 2 | 2 | 1 |
| 29 | 2 | 1 | 2 | 1 | 2 | 2 | 2 | 2 | 1 |
| 30 | 2 | 1 | 1 | 2 | 2 | 2 | 2 | 2 | 1 |
| 31 | 2 | 1 | 2 | 2 | 2 | 2 | 2 | 2 | 1 |
| 32 | 2 | 1 | 1 | 2 | 2 | 2 | 2 | 2 | 1 |
| 33 | 2 | 1 | 1 | 2 | 2 | 2 | 2 | 2 | 1 |
| 34 | 2 | 2 | 2 | 2 | 2 | 2 | 2 | 2 | 1 |
| 35 | 1 | 2 | 2 | 2 | 2 | 2 | 1 | 2 | 1 |
| 36 | 2 | 1 | 2 | 2 | 2 | 2 | 2 | 2 | 1 |
| 37 | 2 | 2 | 2 | 2 | 2 | 2 | 2 | 2 | 1 |
| 38 | 2 | 2 | 2 | 2 | 2 | 2 | 2 | 2 | 1 |
| 39 | 2 | 2 | 2 | 1 | 2 | 2 | 1 | 1 | 2 |
| 40 | 2 | 2 | 2 | 2 | 2 | 2 | 2 | 2 | 1 |
| 41 | 2 | 1 | 1 | 2 | 2 | 2 | 2 | 2 | 1 |
| 42 | 2 | 1 | 1 | 2 | 2 | 2 | 2 | 2 | 1 |
| 43 | 2 | 1 | 1 | 1 | 2 | 2 | 1 | 2 | 1 |
| 44 | 1 | 1 | 1 | 2 | 2 | 2 | 2 | 2 | 2 |
| 45 | 1 | 1 | 1 | 2 | 2 | 2 | 2 | 2 | 2 |
| 46 | 2 | 1 | 2 | 2 | 2 | 2 | 2 | 2 | 1 |
| 47 | 2 | 1 | 1 | 2 | 2 | 2 | 2 | 2 | 2 |
| 48 | 1 | 1 | 1 | 2 | 2 | 2 | 2 | 2 | 2 |
| 49 | 2 | 1 | 1 | 2 | 2 | 2 | 2 | 2 | 1 |
| 50 | 2 | 1 | 1 | 2 | 2 | 2 | 2 | 2 | 1 |
| 51 | 1 | 1 | 1 | 2 | 2 | 2 | 2 | 2 | 1 |
| 52 | 2 | 1 | 1 | 1 | 2 | 2 | 2 | 2 | 1 |
| 53 | 2 | 1 | 1 | 2 | 2 | 2 | 2 | 2 | 1 |
| 54 | 2 | 1 | 1 | 2 | 2 | 2 | 2 | 2 | 2 |
| 55 | 1 | 2 | 2 | 2 | 2 | 2 | 2 | 2 | 2 |
| 56 | 1 | 1 | 2 | 2 | 2 | 2 | 2 | 2 | 1 |
| 57 | 1 | 2 | 2 | 2 | 2 | 2 | 2 | 2 | 2 |
| 58 | 2 | 2 | 2 | 1 | 2 | 2 | 2 | 2 | 1 |
| 59 | 2 | 2 | 1 | 1 | 2 | 2 | 1 | 2 | 1 |
| 60 | 2 | 2 | 1 | 1 | 2 | 2 | 2 | 2 | 1 |

|    |   |   |   |   |   |   |   |   |   |
|----|---|---|---|---|---|---|---|---|---|
| 1  |   |   |   |   |   |   |   |   |   |
| 2  | 2 | 1 | 2 | 1 | 2 | 2 | 2 | 2 | 1 |
| 3  | 2 | 1 | 1 | 2 | 2 | 2 | 2 | 2 | 1 |
| 4  | 2 | 1 | 1 | 1 | 2 | 2 | 1 | 2 | 1 |
| 5  | 2 | 2 | 2 | 2 | 1 | 2 | 2 | 2 | 1 |
| 6  | 2 | 1 | 1 | 1 | 2 | 2 | 2 | 2 | 1 |
| 7  | 2 | 1 | 1 | 2 | 2 | 1 | 2 | 2 | 2 |
| 8  | 2 | 1 | 2 | 2 | 2 | 2 | 2 | 2 | 2 |
| 9  | 2 | 1 | 1 | 1 | 2 | 2 | 2 | 2 | 1 |
| 10 | 2 | 1 | 2 | 2 | 2 | 2 | 2 | 2 | 1 |
| 11 | 2 | 1 | 2 | 2 | 2 | 2 | 2 | 2 | 1 |
| 12 | 1 | 2 | 2 | 2 | 1 | 2 | 1 | 2 | 1 |
| 13 | 2 | 1 | 1 | 1 | 2 | 2 | 2 | 2 | 1 |
| 14 | 2 | 1 | 1 | 2 | 2 | 2 | 2 | 2 | 2 |
| 15 | 2 | 1 | 2 | 2 | 2 | 2 | 2 | 2 | 2 |
| 16 | 2 | 1 | 2 | 2 | 2 | 2 | 2 | 2 | 2 |
| 17 | 1 | 1 | 2 | 1 | 2 | 2 | 1 | 2 | 1 |
| 18 | 2 | 1 | 1 | 2 | 2 | 2 | 1 | 2 | 1 |
| 19 | 2 | 1 | 2 | 2 | 2 | 2 | 2 | 2 | 1 |
| 20 | 2 | 1 | 1 | 2 | 2 | 2 | 2 | 2 | 1 |
| 21 | 2 | 1 | 1 | 2 | 2 | 2 | 2 | 2 | 1 |
| 22 | 1 | 1 | 1 | 2 | 2 | 2 | 2 | 2 | 2 |
| 23 | 1 | 1 | 2 | 1 | 2 | 2 | 2 | 2 | 1 |
| 24 | 2 | 1 | 2 | 2 | 2 | 2 | 2 | 2 | 1 |
| 25 | 2 | 1 | 2 | 2 | 2 | 2 | 2 | 2 | 1 |
| 26 | 2 | 1 | 2 | 2 | 2 | 2 | 2 | 2 | 1 |
| 27 | 1 | 1 | 2 | 1 | 2 | 2 | 2 | 2 | 2 |
| 28 | 2 | 1 | 2 | 2 | 1 | 2 | 1 | 2 | 1 |
| 29 | 2 | 1 | 1 | 2 | 2 | 2 | 1 | 2 | 1 |
| 30 | 1 | 2 | 2 | 1 | 2 | 2 | 1 | 2 | 1 |
| 31 | 1 | 1 | 1 | 2 | 2 | 2 | 1 | 2 | 2 |
| 32 | 2 | 1 | 1 | 2 | 2 | 2 | 2 | 2 | 1 |
| 33 | 2 | 1 | 2 | 2 | 2 | 2 | 2 | 2 | 1 |
| 34 | 2 | 1 | 2 | 2 | 2 | 2 | 2 | 2 | 1 |
| 35 | 2 | 1 | 2 | 2 | 2 | 2 | 2 | 2 | 1 |
| 36 | 2 | 1 | 1 | 2 | 2 | 2 | 2 | 2 | 1 |
| 37 | 2 | 1 | 2 | 2 | 2 | 2 | 2 | 2 | 2 |
| 38 | 1 | 1 | 1 | 2 | 2 | 2 | 2 | 2 | 2 |
| 39 | 2 | 2 | 1 | 1 | 2 | 2 | 1 | 2 | 1 |
| 40 | 1 | 1 | 1 | 2 | 2 | 2 | 2 | 2 | 1 |
| 41 | 2 | 1 | 2 | 2 | 2 | 2 | 2 | 2 | 1 |
| 42 | 2 | 1 | 2 | 2 | 2 | 2 | 2 | 2 | 1 |
| 43 | 2 | 1 | 2 | 2 | 2 | 2 | 2 | 2 | 1 |
| 44 | 1 | 1 | 1 | 2 | 2 | 2 | 2 | 2 | 2 |
| 45 | 2 | 1 | 1 | 2 | 2 | 2 | 2 | 2 | 1 |
| 46 | 2 | 1 | 1 | 2 | 2 | 2 | 1 | 2 | 1 |
| 47 | 2 | 1 | 1 | 2 | 2 | 2 | 2 | 2 | 1 |
| 48 | 2 | 1 | 2 | 2 | 2 | 2 | 2 | 2 | 2 |
| 49 | 2 | 1 | 2 | 2 | 2 | 2 | 2 | 2 | 2 |
| 50 | 1 | 1 | 2 | 1 | 2 | 2 | 2 | 2 | 1 |
| 51 | 2 | 1 | 2 | 2 | 2 | 2 | 1 | 2 | 1 |
| 52 | 1 | 1 | 1 | 1 | 2 | 2 | 2 | 2 | 2 |
| 53 | 2 | 1 | 1 | 2 | 2 | 2 | 1 | 2 | 1 |
| 54 | 2 | 1 | 2 | 2 | 2 | 2 | 2 | 2 | 1 |
| 55 | 1 | 1 | 1 | 2 | 2 | 2 | 2 | 2 | 2 |
| 56 | 2 | 1 | 2 | 2 | 2 | 2 | 2 | 2 | 1 |
| 57 | 1 | 1 | 1 | 2 | 2 | 2 | 2 | 2 | 2 |
| 58 | 2 | 1 | 2 | 2 | 2 | 2 | 2 | 2 | 1 |
| 59 | 1 | 2 | 2 | 1 | 2 | 2 | 2 | 2 | 1 |
| 60 | 2 | 1 | 2 | 2 | 2 | 2 | 2 | 2 | 1 |

|    |   |   |   |   |   |   |   |   |   |
|----|---|---|---|---|---|---|---|---|---|
| 1  |   |   |   |   |   |   |   |   |   |
| 2  | 1 | 1 | 1 | 2 | 2 | 2 | 1 | 2 | 2 |
| 3  | 2 | 1 | 2 | 2 | 2 | 2 | 2 | 2 | 1 |
| 4  | 2 | 1 | 2 | 2 | 2 | 2 | 2 | 2 | 1 |
| 5  | 1 | 1 | 1 | 2 | 2 | 2 | 2 | 2 | 2 |
| 6  | 1 | 1 | 2 | 2 | 2 | 2 | 2 | 2 | 1 |
| 7  | 2 | 1 | 1 | 1 | 2 | 2 | 2 | 2 | 1 |
| 8  | 2 | 1 | 2 | 1 | 2 | 2 | 2 | 2 | 2 |
| 9  | 1 | 1 | 1 | 1 | 2 | 2 | 1 | 2 | 2 |
| 10 | 2 | 1 | 2 | 2 | 2 | 2 | 2 | 2 | 2 |
| 11 | 2 | 1 | 1 | 1 | 2 | 2 | 2 | 2 | 1 |
| 12 | 2 | 1 | 2 | 1 | 2 | 2 | 2 | 2 | 2 |
| 13 | 2 | 1 | 2 | 2 | 2 | 2 | 1 | 2 | 1 |
| 14 | 1 | 1 | 2 | 2 | 2 | 2 | 1 | 2 | 1 |
| 15 | 1 | 1 | 2 | 2 | 2 | 2 | 2 | 2 | 1 |
| 16 | 2 | 1 | 1 | 2 | 2 | 2 | 2 | 2 | 1 |
| 17 | 2 | 1 | 1 | 2 | 2 | 2 | 2 | 2 | 1 |
| 18 | 2 | 2 | 2 | 2 | 2 | 2 | 2 | 2 | 1 |
| 19 | 1 | 1 | 2 | 2 | 1 | 2 | 2 | 2 | 2 |
| 20 | 2 | 2 | 2 | 2 | 2 | 2 | 2 | 2 | 1 |
| 21 | 2 | 2 | 2 | 1 | 2 | 2 | 2 | 2 | 1 |
| 22 | 2 | 1 | 1 | 2 | 1 | 2 | 2 | 2 | 2 |
| 23 | 2 | 1 | 2 | 1 | 1 | 2 | 2 | 2 | 1 |
| 24 | 2 | 1 | 1 | 1 | 2 | 2 | 2 | 2 | 2 |
| 25 | 2 | 1 | 2 | 1 | 2 | 2 | 2 | 2 | 1 |
| 26 | 2 | 1 | 1 | 1 | 2 | 2 | 2 | 2 | 2 |
| 27 | 2 | 1 | 2 | 1 | 2 | 2 | 2 | 2 | 1 |
| 28 | 2 | 1 | 2 | 1 | 2 | 2 | 1 | 2 | 1 |
| 29 | 2 | 1 | 2 | 1 | 2 | 2 | 2 | 2 | 2 |
| 30 | 2 | 1 | 2 | 1 | 2 | 2 | 1 | 2 | 1 |
| 31 | 1 | 1 | 1 | 2 | 2 | 2 | 2 | 2 | 1 |
| 32 | 2 | 1 | 1 | 1 | 2 | 2 | 2 | 2 | 1 |
| 33 | 1 | 1 | 2 | 2 | 2 | 2 | 2 | 2 | 2 |
| 34 | 2 | 1 | 1 | 2 | 2 | 2 | 2 | 2 | 2 |
| 35 | 2 | 1 | 1 | 2 | 2 | 2 | 2 | 2 | 2 |
| 36 | 2 | 1 | 1 | 1 | 2 | 2 | 2 | 2 | 1 |
| 37 | 2 | 1 | 1 | 1 | 2 | 2 | 2 | 2 | 2 |
| 38 | 1 | 1 | 2 | 2 | 2 | 2 | 2 | 2 | 1 |
| 39 | 2 | 1 | 2 | 2 | 2 | 2 | 2 | 2 | 1 |
| 40 | 1 | 1 | 2 | 1 | 2 | 2 | 2 | 2 | 2 |
| 41 | 2 | 1 | 1 | 2 | 2 | 2 | 2 | 2 | 1 |
| 42 | 2 | 1 | 1 | 2 | 2 | 2 | 2 | 2 | 1 |
| 43 | 2 | 1 | 1 | 2 | 2 | 2 | 2 | 2 | 2 |
| 44 | 2 | 1 | 1 | 2 | 2 | 2 | 2 | 2 | 1 |
| 45 | 2 | 1 | 2 | 1 | 2 | 2 | 2 | 2 | 1 |
| 46 | 2 | 1 | 2 | 1 | 2 | 2 | 2 | 2 | 1 |
| 47 | 2 | 1 | 2 | 1 | 2 | 2 | 2 | 2 | 1 |
| 48 | 1 | 2 | 2 | 1 | 2 | 2 | 2 | 2 | 1 |
| 49 | 1 | 1 | 2 | 1 | 2 | 2 | 2 | 2 | 1 |
| 50 | 2 | 1 | 1 | 2 | 2 | 2 | 2 | 2 | 1 |
| 51 | 2 | 1 | 2 | 2 | 2 | 2 | 2 | 2 | 1 |
| 52 | 2 | 1 | 1 | 2 | 2 | 2 | 2 | 2 | 2 |
| 53 | 1 | 1 | 1 | 1 | 2 | 2 | 2 | 2 | 2 |
| 54 | 1 | 2 | 2 | 2 | 2 | 2 | 2 | 2 | 1 |
| 55 | 2 | 2 | 2 | 2 | 2 | 2 | 1 | 2 | 1 |
| 56 | 2 | 1 | 2 | 2 | 2 | 2 | 2 | 2 | 1 |
| 57 | 2 | 1 | 2 | 2 | 2 | 2 | 2 | 2 | 1 |
| 58 | 2 | 1 | 2 | 2 | 2 | 2 | 2 | 2 | 1 |
| 59 | 2 | 1 | 2 | 2 | 2 | 2 | 2 | 2 | 1 |
| 60 | 2 | 1 | 1 | 2 | 2 | 2 | 1 | 2 | 2 |

|    |   |   |   |   |   |   |   |   |   |
|----|---|---|---|---|---|---|---|---|---|
| 1  |   |   |   |   |   |   |   |   |   |
| 2  | 2 | 2 | 2 | 2 | 2 | 2 | 2 | 2 | 1 |
| 3  | 2 | 1 | 1 | 2 | 2 | 2 | 2 | 2 | 1 |
| 4  | 2 | 1 | 2 | 2 | 2 | 2 | 2 | 2 | 2 |
| 5  | 2 | 1 | 1 | 2 | 2 | 2 | 2 | 2 | 1 |
| 6  | 2 | 1 | 1 | 2 | 2 | 2 | 2 | 2 | 1 |
| 7  | 2 | 2 | 1 | 2 | 2 | 2 | 2 | 2 | 1 |
| 8  | 2 | 1 | 1 | 1 | 2 | 2 | 2 | 2 | 1 |
| 9  | 2 | 1 | 1 | 1 | 1 | 2 | 2 | 2 | 2 |
| 10 | 2 | 1 | 2 | 2 | 2 | 2 | 2 | 2 | 1 |
| 11 | 2 | 1 | 2 | 2 | 2 | 2 | 2 | 2 | 2 |
| 12 | 2 | 1 | 2 | 2 | 2 | 2 | 1 | 2 | 1 |
| 13 | 2 | 2 | 2 | 2 | 2 | 2 | 2 | 2 | 1 |
| 14 | 2 | 1 | 2 | 2 | 2 | 2 | 2 | 2 | 1 |
| 15 | 2 | 2 | 2 | 2 | 2 | 2 | 2 | 2 | 1 |
| 16 | 2 | 1 | 2 | 2 | 2 | 2 | 1 | 2 | 1 |
| 17 | 2 | 2 | 2 | 2 | 2 | 2 | 2 | 1 | 2 |
| 18 | 1 | 1 | 1 | 2 | 2 | 2 | 2 | 2 | 1 |
| 19 | 2 | 2 | 2 | 2 | 2 | 2 | 2 | 2 | 2 |
| 20 | 2 | 2 | 2 | 2 | 1 | 2 | 2 | 2 | 1 |
| 21 | 2 | 1 | 2 | 2 | 2 | 2 | 2 | 2 | 1 |
| 22 | 2 | 2 | 2 | 2 | 2 | 2 | 2 | 2 | 2 |
| 23 | 2 | 2 | 2 | 1 | 2 | 2 | 2 | 2 | 1 |
| 24 | 2 | 1 | 1 | 2 | 2 | 2 | 2 | 2 | 1 |
| 25 | 2 | 2 | 2 | 2 | 2 | 2 | 2 | 2 | 2 |
| 26 | 2 | 1 | 1 | 2 | 2 | 2 | 2 | 2 | 1 |
| 27 | 2 | 2 | 2 | 2 | 2 | 2 | 2 | 2 | 2 |
| 28 | 2 | 1 | 1 | 2 | 2 | 2 | 2 | 1 | 1 |
| 29 | 2 | 1 | 1 | 1 | 2 | 2 | 2 | 2 | 1 |
| 30 | 2 | 1 | 2 | 2 | 2 | 2 | 2 | 2 | 1 |
| 31 | 2 | 1 | 2 | 1 | 2 | 2 | 2 | 2 | 1 |
| 32 | 1 | 1 | 2 | 1 | 2 | 2 | 2 | 2 | 1 |
| 33 | 2 | 2 | 2 | 2 | 2 | 2 | 2 | 2 | 1 |
| 34 | 2 | 2 | 1 | 2 | 2 | 2 | 2 | 2 | 1 |
| 35 | 2 | 1 | 1 | 2 | 2 | 2 | 2 | 2 | 1 |
| 36 | 2 | 1 | 1 | 2 | 2 | 2 | 2 | 2 | 1 |
| 37 | 2 | 1 | 2 | 2 | 1 | 2 | 2 | 2 | 1 |
| 38 | 2 | 1 | 1 | 2 | 2 | 2 | 2 | 2 | 1 |
| 39 | 2 | 1 | 2 | 2 | 2 | 2 | 2 | 2 | 1 |
| 40 | 2 | 1 | 2 | 2 | 2 | 2 | 2 | 2 | 1 |
| 41 | 2 | 1 | 1 | 2 | 2 | 2 | 2 | 2 | 2 |
| 42 | 2 | 1 | 1 | 2 | 2 | 2 | 2 | 2 | 1 |
| 43 | 2 | 1 | 1 | 2 | 1 | 2 | 1 | 2 | 2 |
| 44 | 2 | 2 | 2 | 2 | 2 | 2 | 2 | 2 | 1 |
| 45 | 2 | 1 | 2 | 2 | 2 | 2 | 1 | 2 | 1 |
| 46 | 2 | 1 | 2 | 2 | 2 | 2 | 2 | 2 | 1 |
| 47 | 2 | 1 | 2 | 2 | 2 | 2 | 2 | 2 | 1 |
| 48 | 2 | 1 | 2 | 2 | 2 | 2 | 1 | 2 | 1 |
| 49 | 2 | 1 | 2 | 1 | 2 | 2 | 1 | 2 | 1 |
| 50 | 2 | 1 | 2 | 2 | 2 | 2 | 1 | 2 | 1 |
| 51 | 2 | 1 | 2 | 2 | 2 | 2 | 2 | 2 | 2 |
| 52 | 2 | 1 | 2 | 1 | 2 | 2 | 2 | 2 | 1 |
| 53 | 2 | 1 | 2 | 2 | 2 | 2 | 2 | 2 | 1 |
| 54 | 2 | 1 | 2 | 2 | 2 | 2 | 2 | 2 | 1 |
| 55 | 1 | 1 | 2 | 1 | 2 | 2 | 1 | 2 | 1 |
| 56 | 2 | 2 | 2 | 1 | 2 | 2 | 2 | 2 | 2 |
| 57 | 2 | 1 | 1 | 2 | 2 | 2 | 1 | 2 | 1 |
| 58 | 1 | 1 | 2 | 2 | 1 | 1 | 2 | 2 | 1 |
| 59 | 2 | 1 | 1 | 2 | 2 | 2 | 2 | 2 | 1 |
| 60 | 2 | 1 | 1 | 2 | 2 | 2 | 2 | 2 | 1 |



|    |   |   |   |   |   |   |   |   |   |
|----|---|---|---|---|---|---|---|---|---|
| 1  |   |   |   |   |   |   |   |   |   |
| 2  | 2 | 1 | 2 | 2 | 2 | 2 | 1 | 2 | 1 |
| 3  | 1 | 1 | 1 | 1 | 2 | 2 | 2 | 2 | 1 |
| 4  | 2 | 2 | 2 | 2 | 2 | 2 | 2 | 2 | 1 |
| 5  | 2 | 1 | 2 | 1 | 2 | 2 | 1 | 2 | 1 |
| 6  | 2 | 1 | 1 | 2 | 2 | 2 | 2 | 2 | 2 |
| 7  | 2 | 1 | 2 | 1 | 2 | 2 | 2 | 2 | 2 |
| 8  | 2 | 1 | 1 | 2 | 2 | 2 | 2 | 2 | 1 |
| 9  | 2 | 1 | 1 | 2 | 2 | 2 | 2 | 2 | 1 |
| 10 | 2 | 1 | 1 | 2 | 1 | 2 | 2 | 2 | 1 |
| 11 | 2 | 1 | 1 | 2 | 2 | 2 | 2 | 2 | 1 |
| 12 | 2 | 1 | 2 | 1 | 2 | 2 | 2 | 2 | 1 |
| 13 | 2 | 2 | 2 | 2 | 2 | 2 | 2 | 2 | 1 |
| 14 | 2 | 2 | 2 | 2 | 2 | 2 | 2 | 2 | 1 |
| 15 | 2 | 1 | 2 | 1 | 2 | 2 | 2 | 2 | 1 |
| 16 | 2 | 1 | 2 | 2 | 2 | 2 | 1 | 2 | 1 |
| 17 | 2 | 1 | 1 | 2 | 2 | 2 | 1 | 2 | 1 |
| 18 | 2 | 1 | 1 | 2 | 2 | 2 | 1 | 2 | 1 |
| 19 | 2 | 1 | 2 | 2 | 2 | 2 | 2 | 2 | 2 |
| 20 | 2 | 1 | 1 | 2 | 2 | 2 | 1 | 2 | 1 |
| 21 | 2 | 1 | 1 | 2 | 1 | 2 | 2 | 2 | 1 |
| 22 | 2 | 1 | 1 | 2 | 2 | 2 | 2 | 2 | 1 |
| 23 | 2 | 1 | 1 | 2 | 2 | 2 | 1 | 2 | 1 |
| 24 | 1 | 1 | 2 | 1 | 2 | 2 | 2 | 2 | 1 |
| 25 | 2 | 1 | 2 | 2 | 2 | 2 | 2 | 2 | 1 |
| 26 | 2 | 2 | 2 | 2 | 2 | 2 | 2 | 2 | 1 |
| 27 | 2 | 1 | 1 | 2 | 2 | 2 | 2 | 2 | 2 |
| 28 | 2 | 1 | 2 | 1 | 2 | 1 | 2 | 2 | 2 |
| 29 | 2 | 1 | 2 | 1 | 2 | 2 | 2 | 2 | 1 |
| 30 | 2 | 1 | 1 | 2 | 2 | 2 | 2 | 2 | 2 |
| 31 | 1 | 1 | 1 | 2 | 2 | 2 | 2 | 2 | 2 |
| 32 | 2 | 1 | 2 | 1 | 1 | 2 | 1 | 2 | 2 |
| 33 | 1 | 1 | 2 | 2 | 2 | 2 | 2 | 2 | 1 |
| 34 | 1 | 1 | 2 | 2 | 2 | 1 | 2 | 2 | 1 |
| 35 | 2 | 1 | 2 | 2 | 1 | 2 | 2 | 2 | 1 |
| 36 | 2 | 1 | 2 | 2 | 2 | 2 | 2 | 2 | 1 |
| 37 | 2 | 1 | 2 | 2 | 2 | 2 | 2 | 2 | 1 |
| 38 | 2 | 1 | 2 | 2 | 2 | 2 | 2 | 2 | 2 |
| 39 | 2 | 1 | 1 | 1 | 2 | 2 | 2 | 2 | 1 |
| 40 | 2 | 1 | 2 | 2 | 2 | 2 | 2 | 2 | 1 |
| 41 | 2 | 1 | 1 | 1 | 2 | 2 | 2 | 2 | 1 |
| 42 | 2 | 1 | 1 | 2 | 2 | 2 | 2 | 2 | 1 |
| 43 | 2 | 1 | 2 | 2 | 1 | 2 | 1 | 2 | 1 |
| 44 | 2 | 1 | 1 | 1 | 2 | 2 | 2 | 2 | 1 |
| 45 | 2 | 1 | 1 | 2 | 2 | 2 | 1 | 2 | 1 |
| 46 | 2 | 1 | 2 | 2 | 2 | 2 | 2 | 2 | 2 |
| 47 | 2 | 1 | 1 | 2 | 2 | 2 | 2 | 2 | 1 |
| 48 | 2 | 1 | 2 | 2 | 2 | 2 | 2 | 2 | 1 |
| 49 | 2 | 1 | 2 | 1 | 2 | 2 | 2 | 2 | 1 |
| 50 | 2 | 2 | 2 | 2 | 2 | 2 | 2 | 2 | 1 |
| 51 | 1 | 1 | 2 | 2 | 2 | 2 | 2 | 2 | 1 |
| 52 | 2 | 1 | 2 | 2 | 2 | 2 | 1 | 2 | 1 |
| 53 | 2 | 1 | 2 | 1 | 2 | 2 | 2 | 2 | 1 |
| 54 | 2 | 1 | 1 | 2 | 2 | 2 | 2 | 2 | 1 |
| 55 | 2 | 1 | 2 | 2 | 2 | 2 | 2 | 2 | 1 |
| 56 | 2 | 1 | 1 | 2 | 2 | 2 | 2 | 2 | 1 |
| 57 | 2 | 1 | 2 | 2 | 2 | 2 | 2 | 2 | 1 |
| 58 | 2 | 1 | 2 | 1 | 2 | 2 | 2 | 2 | 1 |
| 59 | 2 | 1 | 2 | 2 | 2 | 2 | 2 | 2 | 1 |
| 60 | 2 | 1 | 2 | 1 | 2 | 2 | 2 | 2 | 1 |

|    |   |   |   |   |   |   |   |   |   |
|----|---|---|---|---|---|---|---|---|---|
| 1  |   |   |   |   |   |   |   |   |   |
| 2  | 1 | 1 | 2 | 1 | 1 | 1 | 2 | 2 | 2 |
| 3  | 2 | 1 | 1 | 2 | 2 | 2 | 2 | 2 | 1 |
| 4  | 2 | 1 | 2 | 2 | 2 | 2 | 2 | 2 | 1 |
| 5  | 2 | 1 | 1 | 2 | 2 | 2 | 2 | 2 | 2 |
| 6  | 2 | 1 | 2 | 1 | 2 | 2 | 2 | 2 | 2 |
| 7  | 2 | 1 | 2 | 2 | 2 | 2 | 1 | 2 | 1 |
| 8  | 2 | 1 | 2 | 1 | 2 | 2 | 2 | 2 | 1 |
| 9  | 2 | 1 | 2 | 2 | 2 | 2 | 1 | 2 | 2 |
| 10 | 2 | 1 | 2 | 2 | 2 | 2 | 2 | 2 | 1 |
| 11 | 2 | 1 | 1 | 2 | 2 | 2 | 2 | 2 | 1 |
| 12 | 2 | 1 | 1 | 2 | 2 | 2 | 2 | 2 | 1 |
| 13 | 2 | 1 | 2 | 2 | 2 | 2 | 2 | 2 | 1 |
| 14 | 2 | 1 | 2 | 2 | 2 | 2 | 2 | 2 | 1 |
| 15 | 2 | 1 | 2 | 2 | 2 | 2 | 2 | 2 | 1 |
| 16 | 1 | 1 | 2 | 2 | 1 | 2 | 2 | 2 | 2 |
| 17 | 2 | 1 | 1 | 1 | 2 | 2 | 2 | 2 | 1 |
| 18 | 2 | 1 | 1 | 2 | 2 | 2 | 1 | 2 | 1 |
| 19 | 2 | 1 | 1 | 2 | 2 | 2 | 1 | 2 | 1 |
| 20 | 2 | 1 | 1 | 2 | 2 | 2 | 2 | 2 | 1 |
| 21 | 2 | 1 | 2 | 2 | 2 | 2 | 2 | 2 | 1 |
| 22 | 2 | 1 | 2 | 2 | 2 | 2 | 2 | 2 | 2 |
| 23 | 2 | 1 | 2 | 2 | 2 | 2 | 2 | 2 | 1 |
| 24 | 2 | 1 | 1 | 2 | 2 | 2 | 2 | 2 | 1 |
| 25 | 2 | 1 | 1 | 2 | 2 | 2 | 2 | 2 | 1 |
| 26 | 2 | 1 | 2 | 2 | 2 | 2 | 2 | 2 | 1 |
| 27 | 2 | 1 | 2 | 2 | 2 | 2 | 1 | 2 | 1 |
| 28 | 2 | 2 | 2 | 2 | 2 | 2 | 2 | 2 | 1 |
| 29 | 2 | 1 | 1 | 2 | 2 | 2 | 2 | 2 | 1 |
| 30 | 1 | 1 | 1 | 2 | 2 | 2 | 1 | 2 | 1 |
| 31 | 2 | 2 | 2 | 1 | 2 | 2 | 2 | 2 | 1 |
| 32 | 2 | 2 | 2 | 2 | 2 | 2 | 2 | 2 | 2 |
| 33 | 1 | 1 | 2 | 1 | 2 | 2 | 2 | 2 | 1 |
| 34 | 2 | 1 | 2 | 2 | 2 | 2 | 2 | 2 | 1 |
| 35 | 2 | 1 | 1 | 2 | 2 | 2 | 2 | 2 | 1 |
| 36 | 2 | 1 | 2 | 1 | 2 | 2 | 2 | 2 | 1 |
| 37 | 2 | 1 | 2 | 2 | 2 | 2 | 2 | 2 | 1 |
| 38 | 2 | 1 | 2 | 2 | 2 | 2 | 2 | 2 | 1 |
| 39 | 2 | 1 | 2 | 2 | 2 | 2 | 2 | 2 | 1 |
| 40 | 2 | 2 | 2 | 2 | 2 | 2 | 2 | 2 | 1 |
| 41 | 2 | 1 | 1 | 1 | 2 | 2 | 2 | 2 | 1 |
| 42 | 2 | 1 | 2 | 1 | 2 | 2 | 2 | 2 | 2 |
| 43 | 2 | 2 | 2 | 2 | 2 | 2 | 2 | 2 | 1 |
| 44 | 2 | 2 | 1 | 2 | 2 | 2 | 2 | 2 | 1 |
| 45 | 2 | 1 | 2 | 2 | 2 | 2 | 2 | 2 | 1 |
| 46 | 2 | 1 | 2 | 2 | 2 | 2 | 2 | 2 | 1 |
| 47 | 2 | 1 | 2 | 2 | 2 | 2 | 2 | 2 | 2 |
| 48 | 2 | 2 | 2 | 1 | 2 | 2 | 2 | 2 | 1 |
| 49 | 2 | 1 | 2 | 2 | 2 | 2 | 2 | 2 | 1 |
| 50 | 2 | 1 | 2 | 2 | 2 | 2 | 2 | 2 | 1 |
| 51 | 2 | 2 | 2 | 2 | 2 | 2 | 2 | 2 | 1 |
| 52 | 2 | 2 | 2 | 2 | 2 | 2 | 2 | 2 | 1 |
| 53 | 2 | 1 | 2 | 2 | 2 | 2 | 2 | 2 | 1 |
| 54 | 2 | 1 | 1 | 2 | 2 | 2 | 2 | 2 | 1 |
| 55 | 2 | 1 | 2 | 2 | 2 | 2 | 2 | 2 | 2 |
| 56 | 2 | 1 | 2 | 2 | 2 | 2 | 2 | 2 | 1 |
| 57 | 1 | 1 | 1 | 2 | 2 | 2 | 2 | 2 | 2 |
| 58 | 2 | 1 | 2 | 2 | 2 | 2 | 2 | 2 | 1 |
| 59 | 2 | 1 | 1 | 1 | 2 | 2 | 2 | 2 | 2 |
| 60 | 2 | 1 | 1 | 1 | 2 | 2 | 2 | 2 | 2 |

|    |   |   |   |   |   |   |   |   |   |
|----|---|---|---|---|---|---|---|---|---|
| 1  |   |   |   |   |   |   |   |   |   |
| 2  | 2 | 1 | 2 | 2 | 2 | 2 | 2 | 2 | 1 |
| 3  | 2 | 1 | 1 | 1 | 2 | 2 | 2 | 2 | 1 |
| 4  | 2 | 1 | 2 | 1 | 2 | 2 | 2 | 2 | 1 |
| 5  | 2 | 1 | 2 | 2 | 2 | 2 | 2 | 2 | 1 |
| 6  |   |   |   |   |   |   |   |   |   |
| 7  | 1 | 1 | 1 | 1 | 2 | 1 | 2 | 2 | 1 |
| 8  | 1 | 1 | 2 | 2 | 2 | 2 | 2 | 2 | 1 |
| 9  | 2 | 1 | 2 | 1 | 2 | 2 | 1 | 2 | 2 |
| 10 | 2 | 1 | 2 | 2 | 2 | 2 | 2 | 2 | 1 |
| 11 | 2 | 1 | 2 | 2 | 2 | 2 | 2 | 2 | 1 |
| 12 | 2 | 1 | 2 | 1 | 2 | 2 | 2 | 2 | 1 |
| 13 | 2 | 1 | 2 | 2 | 2 | 2 | 2 | 2 | 1 |
| 14 | 2 | 1 | 2 | 2 | 2 | 2 | 2 | 2 | 1 |
| 15 | 2 | 1 | 1 | 2 | 2 | 2 | 2 | 2 | 1 |
| 16 | 2 | 1 | 1 | 2 | 2 | 2 | 1 | 2 | 2 |
| 17 | 2 | 2 | 1 | 2 | 2 | 2 | 2 | 2 | 2 |
| 18 | 2 | 1 | 1 | 1 | 2 | 2 | 2 | 2 | 1 |
| 19 | 2 | 2 | 2 | 2 | 2 | 2 | 2 | 2 | 1 |
| 20 | 2 | 2 | 2 | 2 | 2 | 2 | 2 | 2 | 1 |
| 21 | 2 | 1 | 2 | 2 | 2 | 2 | 2 | 2 | 1 |
| 22 | 1 | 2 | 2 | 2 | 2 | 1 | 2 | 2 | 2 |
| 23 | 2 | 1 | 2 | 2 | 2 | 2 | 2 | 2 | 1 |
| 24 | 2 | 1 | 2 | 2 | 2 | 2 | 1 | 2 | 1 |
| 25 | 2 | 1 | 2 | 1 | 2 | 2 | 2 | 2 | 1 |
| 26 | 2 | 1 | 1 | 1 | 2 | 2 | 1 | 2 | 1 |
| 27 | 2 | 1 | 1 | 1 | 2 | 2 | 2 | 2 | 1 |
| 28 | 2 | 1 | 2 | 2 | 2 | 2 | 2 | 2 | 2 |
| 29 | 1 | 1 | 1 | 1 | 2 | 2 | 2 | 2 | 1 |
| 30 | 2 | 1 | 1 | 2 | 2 | 2 | 2 | 2 | 2 |
| 31 | 2 | 1 | 2 | 1 | 2 | 2 | 2 | 2 | 1 |
| 32 | 2 | 1 | 2 | 2 | 1 | 2 | 2 | 2 | 1 |
| 33 | 2 | 1 | 2 | 2 | 2 | 1 | 2 | 2 | 1 |
| 34 | 2 | 1 | 1 | 2 | 2 | 2 | 2 | 2 | 1 |
| 35 | 2 | 1 | 2 | 1 | 2 | 2 | 2 | 2 | 1 |
| 36 | 2 | 1 | 2 | 2 | 2 | 2 | 2 | 2 | 1 |
| 37 | 2 | 1 | 2 | 2 | 2 | 2 | 2 | 2 | 1 |
| 38 | 2 | 1 | 2 | 2 | 2 | 2 | 2 | 2 | 1 |
| 39 | 2 | 1 | 2 | 2 | 2 | 2 | 2 | 2 | 2 |
| 40 | 2 | 1 | 1 | 1 | 2 | 2 | 2 | 2 | 1 |
| 41 | 1 | 1 | 2 | 2 | 2 | 2 | 2 | 2 | 2 |
| 42 | 2 | 1 | 2 | 1 | 2 | 2 | 2 | 2 | 2 |
| 43 | 2 | 1 | 2 | 2 | 2 | 2 | 2 | 2 | 1 |
| 44 | 2 | 1 | 2 | 2 | 2 | 2 | 2 | 2 | 1 |
| 45 | 2 | 1 | 2 | 2 | 2 | 2 | 1 | 2 | 1 |
| 46 | 1 | 1 | 2 | 2 | 2 | 2 | 1 | 2 | 1 |
| 47 | 1 | 1 | 2 | 2 | 2 | 2 | 2 | 2 | 1 |
| 48 | 2 | 1 | 1 | 2 | 2 | 2 | 2 | 2 | 2 |
| 49 | 2 | 1 | 1 | 2 | 2 | 2 | 2 | 2 | 1 |
| 50 | 2 | 1 | 1 | 2 | 2 | 2 | 2 | 2 | 1 |
| 51 | 2 | 1 | 1 | 2 | 2 | 2 | 2 | 2 | 2 |
| 52 | 2 | 1 | 2 | 1 | 2 | 2 | 2 | 2 | 2 |
| 53 | 2 | 1 | 1 | 2 | 2 | 2 | 2 | 2 | 1 |
| 54 | 1 | 1 | 1 | 2 | 1 | 2 | 2 | 2 | 1 |
| 55 | 2 | 1 | 2 | 2 | 2 | 2 | 1 | 2 | 1 |
| 56 | 1 | 1 | 2 | 1 | 2 | 2 | 2 | 2 | 2 |
| 57 | 2 | 1 | 1 | 2 | 1 | 2 | 2 | 2 | 2 |
| 58 | 2 | 1 | 1 | 2 | 2 | 2 | 1 | 2 | 2 |
| 59 | 2 | 1 | 1 | 2 | 2 | 2 | 2 | 2 | 2 |
| 60 | 2 | 1 | 1 | 2 | 2 | 2 | 2 | 2 | 1 |

|    |   |   |   |   |   |   |   |   |   |
|----|---|---|---|---|---|---|---|---|---|
| 1  |   |   |   |   |   |   |   |   |   |
| 2  | 2 | 1 | 1 | 2 | 2 | 2 | 2 | 2 | 1 |
| 3  | 2 | 2 | 2 | 2 | 2 | 2 | 2 | 2 | 1 |
| 4  | 2 | 1 | 1 | 1 | 2 | 2 | 2 | 2 | 1 |
| 5  | 2 | 2 | 2 | 1 | 2 | 2 | 2 | 2 | 1 |
| 6  | 2 | 2 | 2 | 2 | 2 | 2 | 2 | 2 | 1 |
| 7  | 2 | 2 | 2 | 2 | 2 | 2 | 2 | 2 | 1 |
| 8  | 2 | 1 | 2 | 2 | 2 | 2 | 2 | 2 | 1 |
| 9  | 2 | 1 | 1 | 2 | 1 | 2 | 2 | 2 | 1 |
| 10 | 2 | 1 | 1 | 2 | 2 | 2 | 2 | 2 | 1 |
| 11 | 2 | 1 | 2 | 2 | 2 | 1 | 1 | 2 | 1 |
| 12 | 2 | 1 | 1 | 2 | 2 | 2 | 2 | 2 | 1 |
| 13 | 2 | 1 | 2 | 2 | 2 | 2 | 1 | 2 | 1 |
| 14 | 2 | 1 | 2 | 1 | 2 | 2 | 2 | 2 | 1 |
| 15 | 2 | 1 | 1 | 2 | 2 | 2 | 2 | 2 | 1 |
| 16 | 2 | 1 | 2 | 2 | 2 | 2 | 2 | 2 | 1 |
| 17 | 2 | 1 | 2 | 2 | 2 | 2 | 2 | 2 | 1 |
| 18 | 1 | 1 | 1 | 2 | 2 | 2 | 2 | 2 | 1 |
| 19 | 2 | 1 | 1 | 1 | 2 | 2 | 2 | 2 | 2 |
| 20 | 2 | 1 | 2 | 2 | 2 | 2 | 2 | 2 | 2 |
| 21 | 2 | 1 | 2 | 2 | 2 | 2 | 1 | 2 | 1 |
| 22 | 2 | 1 | 1 | 2 | 2 | 2 | 2 | 2 | 1 |
| 23 | 2 | 1 | 1 | 2 | 2 | 2 | 1 | 2 | 1 |
| 24 | 2 | 1 | 1 | 2 | 1 | 2 | 2 | 2 | 1 |
| 25 | 2 | 1 | 1 | 2 | 2 | 2 | 2 | 2 | 1 |
| 26 | 2 | 1 | 2 | 2 | 2 | 2 | 2 | 2 | 1 |
| 27 | 2 | 1 | 2 | 2 | 2 | 2 | 1 | 2 | 1 |
| 28 | 2 | 2 | 2 | 2 | 2 | 2 | 2 | 2 | 2 |
| 29 | 2 | 1 | 1 | 2 | 2 | 2 | 2 | 2 | 2 |
| 30 | 2 | 1 | 1 | 2 | 2 | 2 | 2 | 2 | 1 |
| 31 | 2 | 1 | 1 | 2 | 2 | 2 | 2 | 2 | 1 |
| 32 | 1 | 2 | 1 | 2 | 2 | 2 | 2 | 2 | 1 |
| 33 | 2 | 1 | 1 | 2 | 2 | 2 | 1 | 2 | 1 |
| 34 | 2 | 1 | 1 | 2 | 2 | 2 | 1 | 2 | 1 |
| 35 | 2 | 1 | 1 | 2 | 2 | 2 | 2 | 2 | 1 |
| 36 | 2 | 1 | 1 | 1 | 2 | 2 | 2 | 2 | 2 |
| 37 | 2 | 1 | 2 | 1 | 2 | 2 | 1 | 2 | 1 |
| 38 | 2 | 1 | 1 | 2 | 2 | 2 | 2 | 2 | 2 |
| 39 | 2 | 1 | 1 | 2 | 2 | 2 | 2 | 2 | 1 |
| 40 | 2 | 1 | 1 | 2 | 2 | 2 | 1 | 2 | 2 |
| 41 | 2 | 1 | 1 | 2 | 2 | 2 | 2 | 2 | 1 |
| 42 | 2 | 1 | 1 | 2 | 2 | 2 | 2 | 2 | 1 |
| 43 | 2 | 1 | 2 | 2 | 2 | 2 | 2 | 2 | 1 |
| 44 | 2 | 1 | 1 | 2 | 2 | 2 | 2 | 2 | 1 |
| 45 | 1 | 1 | 1 | 1 | 2 | 2 | 2 | 2 | 1 |
| 46 | 2 | 1 | 2 | 2 | 1 | 2 | 1 | 2 | 2 |
| 47 | 2 | 1 | 1 | 1 | 2 | 2 | 2 | 2 | 1 |
| 48 | 2 | 1 | 1 | 2 | 2 | 2 | 1 | 2 | 1 |
| 49 | 2 | 1 | 1 | 2 | 2 | 2 | 2 | 2 | 2 |
| 50 | 2 | 1 | 2 | 2 | 2 | 2 | 2 | 2 | 2 |
| 51 | 2 | 1 | 1 | 2 | 2 | 2 | 1 | 2 | 1 |
| 52 | 1 | 1 | 1 | 2 | 2 | 2 | 2 | 2 | 1 |
| 53 | 2 | 1 | 1 | 2 | 2 | 2 | 1 | 2 | 1 |
| 54 | 2 | 1 | 1 | 1 | 2 | 2 | 2 | 2 | 1 |
| 55 | 2 | 1 | 1 | 2 | 2 | 2 | 1 | 2 | 1 |
| 56 | 2 | 1 | 1 | 2 | 2 | 2 | 2 | 2 | 2 |
| 57 | 2 | 1 | 1 | 1 | 2 | 2 | 1 | 2 | 1 |
| 58 | 2 | 1 | 1 | 1 | 2 | 2 | 2 | 2 | 1 |
| 59 | 2 | 1 | 1 | 1 | 2 | 2 | 2 | 2 | 1 |
| 60 | 1 | 2 | 2 | 2 | 2 | 2 | 2 | 2 | 2 |

|    |   |   |   |   |   |   |   |   |   |
|----|---|---|---|---|---|---|---|---|---|
| 1  |   |   |   |   |   |   |   |   |   |
| 2  | 2 | 1 | 1 | 2 | 2 | 2 | 2 | 2 | 1 |
| 3  | 2 | 1 | 1 | 2 | 2 | 2 | 2 | 2 | 2 |
| 4  | 2 | 1 | 1 | 2 | 2 | 2 | 2 | 2 | 1 |
| 5  | 2 | 1 | 2 | 2 | 2 | 2 | 2 | 2 | 1 |
| 6  | 2 | 1 | 1 | 1 | 2 | 2 | 2 | 2 | 1 |
| 7  | 2 | 2 | 2 | 2 | 2 | 1 | 1 | 2 | 2 |
| 8  | 2 | 1 | 1 | 2 | 2 | 2 | 2 | 2 | 1 |
| 9  | 2 | 1 | 1 | 2 | 2 | 2 | 2 | 2 | 1 |
| 10 | 2 | 1 | 1 | 2 | 1 | 2 | 2 | 2 | 1 |
| 11 | 2 | 1 | 1 | 2 | 2 | 2 | 1 | 2 | 1 |
| 12 | 2 | 1 | 1 | 2 | 2 | 2 | 2 | 2 | 1 |
| 13 | 2 | 1 | 1 | 2 | 2 | 2 | 2 | 2 | 1 |
| 14 | 2 | 1 | 1 | 2 | 2 | 2 | 2 | 2 | 1 |
| 15 | 2 | 1 | 2 | 2 | 2 | 2 | 2 | 1 | 1 |
| 16 | 1 | 1 | 1 | 2 | 2 | 2 | 2 | 2 | 1 |
| 17 | 2 | 2 | 1 | 1 | 2 | 2 | 2 | 2 | 1 |
| 18 | 1 | 1 | 1 | 2 | 2 | 2 | 2 | 2 | 1 |
| 19 | 2 | 1 | 1 | 2 | 2 | 2 | 1 | 2 | 2 |
| 20 | 1 | 1 | 1 | 2 | 1 | 2 | 2 | 2 | 1 |
| 21 | 2 | 1 | 1 | 2 | 2 | 2 | 2 | 2 | 1 |
| 22 | 2 | 1 | 1 | 2 | 2 | 2 | 2 | 2 | 1 |
| 23 | 2 | 1 | 1 | 2 | 2 | 2 | 2 | 2 | 1 |
| 24 | 1 | 1 | 1 | 2 | 2 | 2 | 2 | 2 | 2 |
| 25 | 2 | 1 | 1 | 2 | 2 | 2 | 2 | 2 | 2 |
| 26 | 2 | 2 | 2 | 2 | 2 | 2 | 2 | 2 | 2 |
| 27 | 2 | 1 | 1 | 1 | 2 | 2 | 1 | 2 | 1 |
| 28 | 2 | 1 | 1 | 2 | 2 | 2 | 2 | 2 | 2 |
| 29 | 2 | 2 | 1 | 2 | 2 | 2 | 2 | 2 | 1 |
| 30 | 2 | 1 | 1 | 2 | 2 | 1 | 1 | 2 | 2 |
| 31 | 2 | 1 | 1 | 1 | 1 | 2 | 2 | 2 | 1 |
| 32 | 1 | 1 | 1 | 2 | 2 | 2 | 2 | 2 | 2 |
| 33 | 2 | 1 | 1 | 2 | 1 | 2 | 2 | 2 | 2 |
| 34 | 2 | 1 | 1 | 1 | 2 | 2 | 2 | 2 | 2 |
| 35 | 2 | 1 | 1 | 2 | 2 | 2 | 2 | 2 | 2 |
| 36 | 2 | 1 | 1 | 1 | 2 | 2 | 2 | 2 | 2 |
| 37 | 2 | 1 | 1 | 2 | 1 | 2 | 2 | 2 | 1 |
| 38 | 2 | 1 | 1 | 2 | 2 | 2 | 2 | 2 | 2 |
| 39 | 1 | 1 | 1 | 2 | 2 | 2 | 1 | 2 | 2 |
| 40 | 2 | 1 | 1 | 2 | 2 | 2 | 1 | 2 | 2 |
| 41 | 2 | 1 | 1 | 2 | 2 | 1 | 1 | 2 | 2 |
| 42 | 2 | 1 | 1 | 1 | 2 | 2 | 2 | 2 | 1 |
| 43 | 2 | 1 | 1 | 2 | 2 | 2 | 2 | 2 | 2 |
| 44 | 1 | 1 | 1 | 2 | 2 | 2 | 2 | 2 | 2 |
| 45 | 2 | 1 | 1 | 2 | 2 | 2 | 2 | 2 | 2 |
| 46 | 2 | 1 | 1 | 1 | 2 | 2 | 1 | 2 | 2 |
| 47 | 2 | 1 | 1 | 2 | 2 | 2 | 2 | 2 | 1 |
| 48 | 2 | 1 | 1 | 2 | 1 | 2 | 2 | 2 | 2 |
| 49 | 2 | 1 | 1 | 2 | 2 | 2 | 2 | 2 | 2 |
| 50 | 2 | 1 | 1 | 2 | 2 | 2 | 1 | 2 | 2 |
| 51 | 2 | 1 | 1 | 2 | 2 | 2 | 1 | 2 | 1 |
| 52 | 2 | 2 | 2 | 2 | 2 | 2 | 1 | 2 | 1 |
| 53 | 2 | 1 | 1 | 2 | 2 | 2 | 2 | 2 | 1 |
| 54 | 2 | 1 | 1 | 2 | 2 | 2 | 2 | 2 | 2 |
| 55 | 2 | 1 | 1 | 2 | 2 | 2 | 2 | 2 | 1 |
| 56 | 2 | 1 | 1 | 2 | 2 | 2 | 2 | 2 | 1 |
| 57 | 2 | 1 | 1 | 2 | 2 | 2 | 1 | 2 | 1 |
| 58 | 1 | 1 | 1 | 2 | 2 | 2 | 1 | 2 | 1 |
| 59 | 2 | 1 | 1 | 1 | 2 | 2 | 2 | 2 | 1 |
| 60 | 2 | 1 | 1 | 1 | 2 | 2 | 2 | 2 | 1 |

|    |   |   |   |   |   |   |   |   |   |
|----|---|---|---|---|---|---|---|---|---|
| 1  |   |   |   |   |   |   |   |   |   |
| 2  | 2 | 1 | 1 | 2 | 2 | 2 | 1 | 2 | 1 |
| 3  | 2 | 1 | 1 | 2 | 2 | 2 | 2 | 2 | 1 |
| 4  | 2 | 1 | 1 | 2 | 2 | 2 | 2 | 2 | 1 |
| 5  | 1 | 1 | 1 | 2 | 1 | 2 | 2 | 2 | 1 |
| 6  | 2 | 1 | 1 | 2 | 2 | 2 | 1 | 2 | 2 |
| 7  | 2 | 1 | 1 | 2 | 2 | 2 | 2 | 2 | 1 |
| 8  | 2 | 1 | 1 | 2 | 2 | 2 | 2 | 2 | 2 |
| 9  | 2 | 1 | 1 | 2 | 2 | 2 | 2 | 2 | 2 |
| 10 | 2 | 1 | 1 | 2 | 2 | 2 | 2 | 2 | 1 |
| 11 | 2 | 1 | 1 | 2 | 2 | 2 | 2 | 2 | 1 |
| 12 | 2 | 1 | 1 | 2 | 2 | 2 | 2 | 2 | 1 |
| 13 | 2 | 1 | 1 | 2 | 2 | 2 | 2 | 2 | 1 |
| 14 | 2 | 1 | 1 | 2 | 2 | 2 | 2 | 2 | 1 |
| 15 | 2 | 1 | 1 | 2 | 2 | 2 | 2 | 2 | 1 |
| 16 | 2 | 1 | 1 | 2 | 2 | 2 | 2 | 2 | 1 |
| 17 | 2 | 1 | 1 | 2 | 1 | 2 | 1 | 2 | 1 |
| 18 | 2 | 1 | 1 | 2 | 2 | 2 | 2 | 2 | 1 |
| 19 | 2 | 1 | 1 | 2 | 2 | 2 | 2 | 2 | 1 |
| 20 | 2 | 1 | 1 | 2 | 2 | 2 | 2 | 2 | 1 |
| 21 | 2 | 1 | 1 | 2 | 1 | 2 | 2 | 2 | 1 |
| 22 | 2 | 1 | 1 | 2 | 2 | 2 | 1 | 2 | 1 |
| 23 | 2 | 1 | 1 | 2 | 2 | 2 | 2 | 2 | 1 |
| 24 | 1 | 2 | 1 | 2 | 1 | 2 | 1 | 2 | 1 |
| 25 | 2 | 1 | 2 | 2 | 2 | 2 | 1 | 2 | 2 |
| 26 | 2 | 1 | 1 | 1 | 1 | 2 | 2 | 2 | 1 |
| 27 | 2 | 1 | 1 | 2 | 1 | 2 | 2 | 2 | 1 |
| 28 | 2 | 1 | 1 | 2 | 2 | 2 | 2 | 2 | 1 |
| 29 | 2 | 1 | 1 | 2 | 2 | 2 | 2 | 2 | 1 |
| 30 | 2 | 1 | 1 | 2 | 2 | 2 | 1 | 2 | 1 |
| 31 | 2 | 2 | 2 | 2 | 2 | 2 | 1 | 2 | 2 |
| 32 | 2 | 1 | 1 | 2 | 2 | 2 | 2 | 2 | 1 |
| 33 | 2 | 1 | 1 | 1 | 1 | 2 | 1 | 2 | 1 |
| 34 | 1 | 1 | 1 | 2 | 2 | 2 | 2 | 2 | 1 |
| 35 | 2 | 1 | 1 | 2 | 2 | 2 | 2 | 2 | 1 |
| 36 | 2 | 1 | 1 | 2 | 2 | 2 | 2 | 2 | 1 |
| 37 | 2 | 1 | 1 | 2 | 2 | 2 | 2 | 2 | 1 |
| 38 | 2 | 1 | 1 | 2 | 1 | 2 | 2 | 2 | 2 |
| 39 | 2 | 1 | 1 | 2 | 2 | 2 | 1 | 2 | 1 |
| 40 | 2 | 1 | 1 | 2 | 2 | 2 | 1 | 2 | 1 |
| 41 | 1 | 2 | 1 | 2 | 2 | 2 | 2 | 2 | 1 |
| 42 | 2 | 1 | 2 | 2 | 2 | 2 | 2 | 2 | 1 |
| 43 | 2 | 1 | 1 | 2 | 2 | 2 | 2 | 2 | 2 |
| 44 | 2 | 1 | 1 | 2 | 1 | 2 | 2 | 2 | 1 |
| 45 | 2 | 1 | 1 | 2 | 2 | 2 | 2 | 2 | 2 |
| 46 | 2 | 1 | 1 | 2 | 2 | 2 | 2 | 2 | 1 |
| 47 | 1 | 2 | 2 | 2 | 2 | 2 | 1 | 2 | 1 |
| 48 | 2 | 1 | 2 | 2 | 2 | 2 | 2 | 2 | 1 |
| 49 | 2 | 2 | 2 | 2 | 2 | 2 | 2 | 2 | 1 |
| 50 | 2 | 1 | 2 | 2 | 2 | 2 | 1 | 2 | 1 |
| 51 | 2 | 1 | 2 | 2 | 2 | 2 | 2 | 2 | 1 |
| 52 | 2 | 1 | 1 | 2 | 2 | 2 | 2 | 2 | 1 |
| 53 | 2 | 1 | 1 | 2 | 2 | 2 | 2 | 2 | 1 |
| 54 | 2 | 1 | 2 | 2 | 2 | 2 | 1 | 2 | 1 |
| 55 | 2 | 1 | 2 | 1 | 2 | 2 | 2 | 2 | 1 |
| 56 | 2 | 1 | 1 | 2 | 2 | 2 | 2 | 2 | 1 |
| 57 | 2 | 1 | 2 | 2 | 2 | 2 | 2 | 2 | 1 |
| 58 | 2 | 1 | 2 | 2 | 2 | 2 | 2 | 2 | 1 |
| 59 | 2 | 1 | 2 | 2 | 2 | 2 | 2 | 2 | 1 |
| 60 | 2 | 1 | 2 | 2 | 2 | 2 | 1 | 2 | 1 |

|    |   |   |   |   |   |   |   |   |   |
|----|---|---|---|---|---|---|---|---|---|
| 1  |   |   |   |   |   |   |   |   |   |
| 2  | 2 | 1 | 1 | 2 | 2 | 2 | 1 | 2 | 1 |
| 3  | 2 | 1 | 2 | 2 | 2 | 2 | 2 | 2 | 1 |
| 4  | 2 | 1 | 1 | 2 | 1 | 2 | 1 | 2 | 1 |
| 5  | 2 | 1 | 2 | 2 | 2 | 2 | 1 | 2 | 1 |
| 6  | 2 | 1 | 2 | 1 | 1 | 2 | 1 | 2 | 1 |
| 7  | 2 | 1 | 2 | 1 | 2 | 2 | 2 | 2 | 1 |
| 8  | 2 | 1 | 2 | 2 | 2 | 2 | 2 | 2 | 1 |
| 9  | 1 | 2 | 2 | 2 | 2 | 2 | 2 | 2 | 1 |
| 10 | 2 | 1 | 2 | 2 | 2 | 2 | 2 | 2 | 1 |
| 11 | 2 | 1 | 2 | 2 | 2 | 2 | 2 | 2 | 1 |
| 12 | 2 | 2 | 2 | 1 | 2 | 2 | 1 | 2 | 1 |
| 13 | 2 | 2 | 2 | 1 | 2 | 2 | 2 | 2 | 1 |
| 14 | 2 | 2 | 2 | 2 | 2 | 2 | 2 | 2 | 1 |
| 15 | 2 | 1 | 2 | 2 | 2 | 2 | 1 | 2 | 1 |
| 16 | 2 | 1 | 1 | 2 | 2 | 2 | 2 | 2 | 1 |
| 17 | 2 | 1 | 1 | 2 | 2 | 2 | 2 | 2 | 1 |
| 18 | 2 | 1 | 1 | 2 | 2 | 2 | 2 | 2 | 1 |
| 19 | 2 | 1 | 1 | 2 | 2 | 2 | 2 | 2 | 1 |
| 20 | 2 | 1 | 1 | 2 | 2 | 1 | 2 | 2 | 2 |
| 21 | 2 | 1 | 1 | 2 | 2 | 2 | 2 | 2 | 1 |
| 22 | 2 | 1 | 1 | 1 | 2 | 2 | 1 | 2 | 1 |
| 23 | 2 | 2 | 2 | 2 | 2 | 2 | 2 | 2 | 1 |
| 24 | 1 | 2 | 2 | 2 | 2 | 2 | 1 | 2 | 1 |
| 25 | 2 | 1 | 1 | 1 | 2 | 1 | 2 | 2 | 1 |
| 26 | 2 | 1 | 1 | 2 | 2 | 2 | 1 | 2 | 1 |
| 27 | 2 | 2 | 1 | 1 | 2 | 2 | 2 | 2 | 1 |
| 28 | 2 | 2 | 1 | 2 | 2 | 2 | 2 | 2 | 1 |
| 29 | 2 | 1 | 2 | 2 | 2 | 2 | 1 | 2 | 1 |
| 30 | 2 | 1 | 1 | 1 | 2 | 2 | 2 | 2 | 2 |
| 31 | 2 | 1 | 2 | 2 | 2 | 2 | 1 | 2 | 1 |
| 32 | 2 | 1 | 2 | 1 | 2 | 2 | 2 | 2 | 2 |
| 33 | 2 | 1 | 1 | 1 | 2 | 2 | 2 | 2 | 1 |
| 34 | 2 | 1 | 2 | 1 | 2 | 2 | 2 | 2 | 1 |
| 35 | 2 | 1 | 2 | 1 | 2 | 2 | 2 | 2 | 1 |
| 36 | 2 | 1 | 2 | 2 | 2 | 2 | 2 | 2 | 1 |
| 37 | 2 | 1 | 2 | 1 | 2 | 2 | 2 | 2 | 1 |
| 38 | 2 | 1 | 2 | 2 | 2 | 2 | 2 | 2 | 1 |
| 39 | 1 | 2 | 2 | 2 | 2 | 2 | 1 | 2 | 1 |
| 40 | 2 | 1 | 2 | 1 | 2 | 2 | 2 | 2 | 1 |
| 41 | 2 | 1 | 2 | 2 | 1 | 2 | 2 | 2 | 1 |
| 42 | 2 | 1 | 2 | 1 | 1 | 1 | 2 | 2 | 2 |
| 43 | 2 | 2 | 2 | 2 | 2 | 2 | 1 | 2 | 2 |
| 44 | 2 | 1 | 2 | 1 | 2 | 1 | 1 | 2 | 1 |
| 45 | 2 | 2 | 2 | 2 | 2 | 2 | 2 | 2 | 1 |
| 46 | 2 | 1 | 2 | 2 | 2 | 2 | 1 | 2 | 1 |
| 47 | 2 | 1 | 2 | 1 | 2 | 2 | 2 | 2 | 2 |
| 48 | 2 | 1 | 2 | 2 | 2 | 2 | 2 | 2 | 1 |
| 49 | 2 | 1 | 2 | 2 | 2 | 2 | 2 | 2 | 1 |
| 50 | 2 | 1 | 1 | 1 | 2 | 2 | 1 | 2 | 1 |
| 51 | 2 | 1 | 1 | 2 | 2 | 2 | 1 | 2 | 1 |
| 52 | 2 | 1 | 2 | 2 | 2 | 2 | 1 | 2 | 1 |
| 53 | 2 | 1 | 2 | 2 | 2 | 2 | 1 | 2 | 2 |
| 54 | 2 | 1 | 2 | 2 | 2 | 2 | 2 | 2 | 2 |
| 55 | 2 | 1 | 1 | 2 | 2 | 2 | 2 | 2 | 1 |
| 56 | 2 | 2 | 1 | 2 | 2 | 2 | 2 | 2 | 2 |
| 57 | 2 | 1 | 1 | 1 | 2 | 2 | 1 | 2 | 1 |
| 58 | 2 | 1 | 1 | 1 | 2 | 2 | 2 | 2 | 1 |
| 59 | 2 | 1 | 1 | 2 | 2 | 2 | 2 | 2 | 1 |
| 60 | 2 | 1 | 1 | 2 | 2 | 2 | 1 | 2 | 1 |

|    |   |   |   |   |   |   |   |   |   |
|----|---|---|---|---|---|---|---|---|---|
| 1  |   |   |   |   |   |   |   |   |   |
| 2  | 2 | 2 | 2 | 2 | 2 | 2 | 2 | 2 | 1 |
| 3  | 2 | 1 | 2 | 2 | 2 | 2 | 1 | 2 | 1 |
| 4  | 2 | 2 | 2 | 2 | 2 | 2 | 2 | 2 | 1 |
| 5  | 2 | 1 | 2 | 2 | 2 | 2 | 2 | 2 | 2 |
| 6  |   |   |   |   |   |   |   |   |   |
| 7  | 1 | 1 | 2 | 2 | 2 | 2 | 1 | 2 | 2 |
| 8  | 2 | 2 | 2 | 2 | 2 | 2 | 2 | 2 | 2 |
| 9  | 2 | 1 | 2 | 1 | 2 | 2 | 2 | 2 | 1 |
| 10 | 2 | 1 | 2 | 2 | 2 | 2 | 1 | 2 | 2 |
| 11 | 2 | 1 | 2 | 1 | 2 | 2 | 2 | 2 | 2 |
| 12 |   |   |   |   |   |   |   |   |   |
| 13 | 2 | 1 | 2 | 2 | 2 | 2 | 1 | 2 | 1 |
| 14 | 2 | 1 | 1 | 2 | 2 | 2 | 1 | 2 | 1 |
| 15 | 2 | 1 | 2 | 2 | 2 | 1 | 2 | 2 | 1 |
| 16 | 2 | 1 | 2 | 2 | 2 | 2 | 1 | 2 | 1 |
| 17 | 2 | 2 | 1 | 2 | 2 | 2 | 2 | 2 | 1 |
| 18 | 2 | 2 | 2 | 2 | 2 | 2 | 2 | 2 | 1 |
| 19 |   |   |   |   |   |   |   |   |   |
| 20 | 2 | 1 | 1 | 2 | 2 | 2 | 2 | 2 | 1 |
| 21 | 2 | 1 | 2 | 1 | 1 | 2 | 2 | 2 | 2 |
| 22 | 2 | 1 | 2 | 2 | 2 | 1 | 2 | 2 | 1 |
| 23 |   |   |   |   |   |   |   |   |   |
| 24 | 1 | 1 | 2 | 2 | 2 | 2 | 1 | 2 | 2 |
| 25 | 2 | 1 | 2 | 1 | 2 | 2 | 2 | 2 | 1 |
| 26 | 2 | 1 | 2 | 2 | 2 | 2 | 1 | 2 | 2 |
| 27 | 1 | 1 | 1 | 2 | 2 | 1 | 1 | 2 | 1 |
| 28 | 2 | 1 | 2 | 2 | 2 | 2 | 1 | 2 | 1 |
| 29 | 2 | 2 | 2 | 1 | 2 | 2 | 2 | 2 | 2 |
| 30 | 2 | 1 | 1 | 2 | 2 | 1 | 1 | 2 | 1 |
| 31 | 2 | 1 | 2 | 2 | 2 | 2 | 2 | 2 | 1 |
| 32 | 2 | 2 | 2 | 2 | 2 | 2 | 1 | 2 | 2 |
| 33 | 2 | 2 | 2 | 2 | 2 | 2 | 2 | 2 | 2 |
| 34 | 1 | 2 | 2 | 2 | 2 | 2 | 2 | 2 | 2 |
| 35 | 2 | 1 | 2 | 2 | 2 | 2 | 2 | 2 | 1 |
| 36 | 2 | 2 | 2 | 2 | 2 | 2 | 1 | 2 | 1 |
| 37 | 2 | 1 | 2 | 2 | 2 | 2 | 2 | 2 | 2 |
| 38 | 2 | 1 | 2 | 2 | 2 | 2 | 2 | 2 | 2 |
| 39 | 2 | 1 | 2 | 2 | 2 | 2 | 2 | 2 | 1 |
| 40 | 2 | 1 | 1 | 2 | 2 | 2 | 2 | 2 | 1 |
| 41 | 2 | 1 | 1 | 2 | 2 | 2 | 1 | 2 | 2 |
| 42 |   |   |   |   |   |   |   |   |   |
| 43 | 1 | 2 | 2 | 1 | 2 | 2 | 2 | 2 | 1 |
| 44 | 2 | 1 | 1 | 2 | 2 | 2 | 2 | 2 | 1 |
| 45 | 2 | 1 | 2 | 1 | 2 | 2 | 2 | 2 | 2 |
| 46 | 1 | 1 | 1 | 2 | 2 | 2 | 2 | 2 | 2 |
| 47 | 1 | 1 | 2 | 2 | 2 | 2 | 1 | 2 | 1 |
| 48 |   |   |   |   |   |   |   |   |   |
| 49 | 2 | 1 | 1 | 2 | 2 | 2 | 2 | 2 | 1 |
| 50 | 2 | 1 | 2 | 2 | 2 | 2 | 2 | 2 | 2 |
| 51 | 2 | 2 | 2 | 1 | 2 | 2 | 1 | 2 | 1 |
| 52 | 2 | 1 | 2 | 1 | 2 | 2 | 1 | 2 | 2 |
| 53 | 2 | 1 | 1 | 2 | 2 | 2 | 2 | 2 | 1 |
| 54 | 2 | 1 | 2 | 2 | 2 | 2 | 2 | 2 | 2 |
| 55 | 2 | 1 | 1 | 1 | 2 | 1 | 2 | 2 | 1 |
| 56 | 2 | 1 | 2 | 1 | 2 | 2 | 2 | 2 | 2 |
| 57 | 2 | 1 | 1 | 2 | 2 | 2 | 2 | 2 | 1 |
| 58 | 2 | 1 | 1 | 2 | 2 | 2 | 2 | 2 | 1 |
| 59 | 2 | 1 | 2 | 1 | 2 | 2 | 2 | 2 | 1 |
| 60 | 2 | 1 | 1 | 2 | 2 | 2 | 2 | 2 | 1 |



1  
2            2            2            2            1            2            1            2            2            1  
3  
4  
5  
6  
7  
8  
9  
10  
11  
12  
13  
14  
15  
16  
17  
18  
19  
20  
21  
22  
23  
24  
25  
26  
27  
28  
29  
30  
31  
32  
33  
34  
35  
36  
37  
38  
39  
40  
41  
42  
43  
44  
45  
46  
47  
48  
49  
50  
51  
52  
53  
54  
55  
56  
57  
58  
59  
60

For peer review only

|    | )_Amputati | HO_FU | IWGDFcat | WGDF_cat_4 |
|----|------------|-------|----------|------------|
| 1  |            |       |          |            |
| 2  |            |       |          |            |
| 3  | 2          | 2     | 21       | 2          |
| 4  | 2          | 2     | 0        | 0          |
| 5  | 2          | 2     | 0        | 0          |
| 6  | 2          | 2     | 21       | 2          |
| 7  | 2          | 2     | 0        | 0          |
| 8  | 2          | 2     | 0        | 0          |
| 9  | 2          | 2     | 0        | 0          |
| 10 | 2          | 2     | 0        | 0          |
| 11 | 1          | 2     | 32       | 4          |
| 12 | 2          | 2     | 0        | 0          |
| 13 | 2          | 2     | 0        | 0          |
| 14 | 2          | 2     | 0        | 0          |
| 15 | 2          | 2     | 1        | 1          |
| 16 | 2          | 2     | 1        | 1          |
| 17 | 2          | 2     | 1        | 1          |
| 18 | 2          | 2     | 0        | 0          |
| 19 | 2          | 2     | 0        | 0          |
| 20 | 2          | 2     | 0        | 0          |
| 21 | 2          | 2     | 0        | 0          |
| 22 | 2          | 1     | 31       | 3          |
| 23 | 2          | 1     | 31       | 3          |
| 24 | 2          | 2     | 0        | 0          |
| 25 | 2          | 2     | 0        | 0          |
| 26 | 1          | 2     | 32       | 4          |
| 27 | 1          | 2     | 32       | 4          |
| 28 | 2          | 2     | 21       | 2          |
| 29 | 2          | 2     | 0        | 0          |
| 30 | 2          | 2     | 0        | 0          |
| 31 | 2          | 2     | 0        | 0          |
| 32 | 2          | 2     | 1        | 1          |
| 33 | 2          | 2     | 0        | 0          |
| 34 | 2          | 2     | 0        | 0          |
| 35 | 2          | 2     | 0        | 0          |
| 36 | 2          | 2     | 0        | 0          |
| 37 | 2          | 2     | 0        | 0          |
| 38 | 2          | 2     | 0        | 0          |
| 39 | 2          | 2     | 0        | 0          |
| 40 | 2          | 1     | 31       | 3          |
| 41 | 2          | 2     | 0        | 0          |
| 42 | 2          | 2     | 21       | 2          |
| 43 | 2          | 2     | 0        | 0          |
| 44 | 2          | 1     | 31       | 3          |
| 45 | 2          | 2     | 0        | 0          |
| 46 | 2          | 2     | 0        | 0          |
| 47 | 2          | 2     | 21       | 2          |
| 48 | 2          | 1     | 31       | 3          |
| 49 | 2          | 2     | 0        | 0          |
| 50 | 2          | 2     | 0        | 0          |
| 51 | 2          | 2     | 0        | 0          |
| 52 | 2          | 2     | 0        | 0          |
| 53 | 2          | 1     | 31       | 3          |
| 54 | 2          | 1     | 31       | 3          |
| 55 | 2          | 2     | 0        | 0          |
| 56 | 2          | 2     | 0        | 0          |
| 57 | 1          | 2     | 32       | 4          |
| 58 | 2          | 2     | 0        | 0          |
| 59 | 1          | 2     | 32       | 4          |
| 60 | 1          | 2     | 32       | 4          |

|    |   |   |    |   |
|----|---|---|----|---|
| 1  |   |   |    |   |
| 2  | 2 | 2 | 0  | 0 |
| 3  | 2 | 2 | 0  | 0 |
| 4  | 2 | 2 | 0  | 0 |
| 5  | 2 | 2 | 1  | 1 |
| 6  | 2 | 2 | 0  | 0 |
| 7  | 2 | 2 | 0  | 0 |
| 8  | 2 | 2 | 0  | 0 |
| 9  | 1 | 2 | 32 | 4 |
| 10 | 2 | 2 | 21 | 2 |
| 11 | 2 | 2 | 0  | 0 |
| 12 | 2 | 1 | 31 | 3 |
| 13 | 2 | 2 | 0  | 0 |
| 14 | 2 | 2 | 0  | 0 |
| 15 | 1 | 2 | 32 | 4 |
| 16 | 2 | 2 | 0  | 0 |
| 17 | 2 | 2 | 0  | 0 |
| 18 | 1 | 2 | 32 | 4 |
| 19 | 1 | 1 | 32 | 4 |
| 20 | 1 | 1 | 32 | 4 |
| 21 | 2 | 2 | 0  | 0 |
| 22 | 2 | 2 | 0  | 0 |
| 23 | 1 | 2 | 32 | 4 |
| 24 | 2 | 2 | 1  | 1 |
| 25 | 2 | 2 | 0  | 0 |
| 26 | 2 | 2 | 0  | 0 |
| 27 | 1 | 2 | 32 | 4 |
| 28 | 2 | 2 | 0  | 0 |
| 29 | 2 | 2 | 0  | 0 |
| 30 | 2 | 2 | 1  | 1 |
| 31 | 2 | 2 | 0  | 0 |
| 32 | 2 | 2 | 0  | 0 |
| 33 | 2 | 2 | 0  | 0 |
| 34 | 2 | 2 | 0  | 0 |
| 35 | 2 | 2 | 1  | 1 |
| 36 | 2 | 2 | 0  | 0 |
| 37 | 2 | 2 | 0  | 0 |
| 38 | 2 | 2 | 0  | 0 |
| 39 | 2 | 2 | 1  | 1 |
| 40 | 2 | 1 | 31 | 3 |
| 41 | 2 | 2 | 0  | 0 |
| 42 | 2 | 2 | 0  | 0 |
| 43 | 2 | 2 | 0  | 0 |
| 44 | 2 | 2 | 0  | 0 |
| 45 | 1 | 2 | 32 | 4 |
| 46 | 2 | 1 | 31 | 3 |
| 47 | 2 | 2 | 0  | 0 |
| 48 | 2 | 2 | 0  | 0 |
| 49 | 2 | 2 | 0  | 0 |
| 50 | 2 | 2 | 0  | 0 |
| 51 | 2 | 2 | 0  | 0 |
| 52 | 2 | 1 | 31 | 3 |
| 53 | 2 | 2 | 21 | 2 |
| 54 | 2 | 1 | 31 | 3 |
| 55 | 2 | 2 | 0  | 0 |
| 56 | 2 | 2 | 0  | 0 |
| 57 | 2 | 2 | 1  | 1 |
| 58 | 2 | 2 | 0  | 0 |
| 59 | 2 | 2 | 0  | 0 |
| 60 | 2 | 2 | 0  | 0 |

|    |   |   |    |   |
|----|---|---|----|---|
| 1  |   |   |    |   |
| 2  | 2 | 2 | 0  | 0 |
| 3  | 2 | 2 | 0  | 0 |
| 4  | 2 | 2 | 1  | 1 |
| 5  | 2 | 2 | 0  | 0 |
| 6  |   |   |    |   |
| 7  | 2 | 2 | 0  | 0 |
| 8  | 1 | 2 | 32 | 4 |
| 9  | 2 | 2 | 0  | 0 |
| 10 | 2 | 2 | 0  | 0 |
| 11 | 2 | 2 | 21 | 2 |
| 12 | 2 | 2 | 0  | 0 |
| 13 | 2 | 2 | 0  | 0 |
| 14 | 2 | 2 | 0  | 0 |
| 15 | 2 | 2 | 0  | 0 |
| 16 | 2 | 2 | 21 | 2 |
| 17 | 2 | 2 | 21 | 2 |
| 18 | 2 | 2 | 1  | 1 |
| 19 | 2 | 2 | 0  | 0 |
| 20 | 2 | 2 | 0  | 0 |
| 21 | 2 | 2 | 0  | 0 |
| 22 | 2 | 2 | 0  | 0 |
| 23 | 2 | 2 | 0  | 0 |
| 24 | 2 | 2 | 0  | 0 |
| 25 | 2 | 2 | 0  | 0 |
| 26 | 1 | 2 | 32 | 4 |
| 27 | 1 | 1 | 32 | 4 |
| 28 | 2 | 2 | 0  | 0 |
| 29 | 2 | 2 | 0  | 0 |
| 30 | 2 | 2 | 0  | 0 |
| 31 | 2 | 2 | 0  | 0 |
| 32 | 2 | 2 | 0  | 0 |
| 33 | 2 | 2 | 0  | 0 |
| 34 | 2 | 2 | 21 | 2 |
| 35 | 2 | 2 | 1  | 1 |
| 36 | 2 | 2 | 0  | 0 |
| 37 | 2 | 2 | 0  | 0 |
| 38 | 2 | 2 | 0  | 0 |
| 39 | 2 | 2 | 0  | 0 |
| 40 | 1 | 2 | 32 | 4 |
| 41 | 2 | 2 | 0  | 0 |
| 42 | 2 | 1 | 31 | 3 |
| 43 | 2 | 2 | 21 | 2 |
| 44 | 1 | 2 | 32 | 4 |
| 45 | 2 | 2 | 1  | 1 |
| 46 | 2 | 2 | 0  | 0 |
| 47 | 2 | 2 | 0  | 0 |
| 48 | 2 | 2 | 0  | 0 |
| 49 | 2 | 2 | 0  | 0 |
| 50 | 2 | 2 | 0  | 0 |
| 51 | 2 | 2 | 0  | 0 |
| 52 | 2 | 1 | 31 | 3 |
| 53 | 2 | 2 | 0  | 0 |
| 54 | 2 | 2 | 1  | 1 |
| 55 | 2 | 2 | 0  | 0 |
| 56 | 1 | 1 | 32 | 4 |
| 57 | 1 | 2 | 32 | 4 |
| 58 | 1 | 2 | 32 | 4 |
| 59 | 1 | 2 | 32 | 4 |
| 60 | 2 | 2 | 0  | 0 |

|    |   |   |    |   |
|----|---|---|----|---|
| 1  |   |   |    |   |
| 2  | 2 | 2 | 0  | 0 |
| 3  | 2 | 1 | 31 | 3 |
| 4  | 1 | 2 | 32 | 4 |
| 5  | 2 | 1 | 31 | 3 |
| 6  | 2 | 2 | 21 | 2 |
| 7  | 2 | 1 | 31 | 3 |
| 8  | 2 | 2 | 21 | 2 |
| 9  | 2 | 2 | 21 | 2 |
| 10 | 2 | 2 | 21 | 2 |
| 11 | 1 | 1 | 32 | 4 |
| 12 | 2 | 1 | 31 | 3 |
| 13 | 2 | 2 | 21 | 2 |
| 14 | 2 | 2 | 0  | 0 |
| 15 | 2 | 1 | 31 | 3 |
| 16 | 2 | 2 | 0  | 0 |
| 17 | 2 | 2 | 0  | 0 |
| 18 | 2 | 2 | 0  | 0 |
| 19 | 2 | 2 | 0  | 0 |
| 20 | 2 | 2 | 0  | 0 |
| 21 | 1 | 2 | 32 | 4 |
| 22 | 2 | 2 | 21 | 2 |
| 23 | 2 | 2 | 0  | 0 |
| 24 | 2 | 2 | 21 | 2 |
| 25 | 2 | 2 | 0  | 0 |
| 26 | 2 | 2 | 0  | 0 |
| 27 | 2 | 2 | 0  | 0 |
| 28 | 2 | 1 | 31 | 3 |
| 29 | 1 | 1 | 32 | 4 |
| 30 | 2 | 2 | 0  | 0 |
| 31 | 2 | 2 | 21 | 2 |
| 32 | 2 | 2 | 0  | 0 |
| 33 | 2 | 2 | 0  | 0 |
| 34 | 2 | 2 | 0  | 0 |
| 35 | 2 | 2 | 0  | 0 |
| 36 | 2 | 2 | 0  | 0 |
| 37 | 2 | 2 | 0  | 0 |
| 38 | 2 | 2 | 0  | 0 |
| 39 | 2 | 2 | 0  | 0 |
| 40 | 1 | 1 | 32 | 4 |
| 41 | 2 | 1 | 31 | 3 |
| 42 | 2 | 2 | 21 | 2 |
| 43 | 2 | 2 | 0  | 0 |
| 44 | 1 | 2 | 32 | 4 |
| 45 | 2 | 2 | 0  | 0 |
| 46 | 2 | 2 | 1  | 1 |
| 47 | 2 | 2 | 0  | 0 |
| 48 | 2 | 2 | 0  | 0 |
| 49 | 2 | 2 | 21 | 2 |
| 50 | 2 | 2 | 0  | 0 |
| 51 | 2 | 2 | 0  | 0 |
| 52 | 2 | 2 | 0  | 0 |
| 53 | 2 | 2 | 0  | 0 |
| 54 | 2 | 2 | 0  | 0 |
| 55 | 2 | 2 | 0  | 0 |
| 56 | 2 | 2 | 0  | 0 |
| 57 | 2 | 2 | 0  | 0 |
| 58 | 2 | 2 | 0  | 0 |
| 59 | 2 | 2 | 0  | 0 |
| 60 | 1 | 2 | 32 | 4 |

|    |   |   |    |   |
|----|---|---|----|---|
| 1  |   |   |    |   |
| 2  | 2 | 2 | 21 | 2 |
| 3  | 2 | 2 | 0  | 0 |
| 4  | 2 | 1 | 31 | 3 |
| 5  | 2 | 2 | 0  | 0 |
| 6  | 1 | 1 | 32 | 4 |
| 7  | 2 | 2 | 0  | 0 |
| 8  | 2 | 2 | 0  | 0 |
| 9  | 2 | 2 | 0  | 0 |
| 10 | 1 | 2 | 32 | 4 |
| 11 | 2 | 2 | 0  | 0 |
| 12 | 2 | 1 | 31 | 3 |
| 13 | 2 | 1 | 31 | 3 |
| 14 | 2 | 2 | 0  | 0 |
| 15 | 2 | 1 | 31 | 3 |
| 16 | 2 | 2 | 21 | 2 |
| 17 | 2 | 2 | 0  | 0 |
| 18 | 2 | 2 | 1  | 1 |
| 19 | 2 | 2 | 0  | 0 |
| 20 | 2 | 2 | 1  | 1 |
| 21 | 2 | 2 | 0  | 0 |
| 22 | 2 | 2 | 21 | 2 |
| 23 | 2 | 2 | 0  | 0 |
| 24 | 2 | 2 | 0  | 0 |
| 25 | 2 | 2 | 0  | 0 |
| 26 | 2 | 2 | 0  | 0 |
| 27 | 2 | 2 | 0  | 0 |
| 28 | 2 | 2 | 1  | 1 |
| 29 | 2 | 2 | 21 | 2 |
| 30 | 2 | 2 | 0  | 0 |
| 31 | 2 | 2 | 0  | 0 |
| 32 | 2 | 2 | 0  | 0 |
| 33 | 2 | 2 | 21 | 2 |
| 34 | 2 | 2 | 21 | 2 |
| 35 | 2 | 2 | 0  | 0 |
| 36 | 2 | 2 | 0  | 0 |
| 37 | 2 | 2 | 0  | 0 |
| 38 | 2 | 2 | 0  | 0 |
| 39 | 2 | 2 | 0  | 0 |
| 40 | 2 | 2 | 0  | 0 |
| 41 | 2 | 2 | 0  | 0 |
| 42 | 2 | 2 | 0  | 0 |
| 43 | 2 | 1 | 31 | 3 |
| 44 | 2 | 2 | 0  | 0 |
| 45 | 2 | 2 | 0  | 0 |
| 46 | 2 | 2 | 0  | 0 |
| 47 | 2 | 1 | 31 | 3 |
| 48 | 1 | 2 | 32 | 4 |
| 49 | 1 | 2 | 32 | 4 |
| 50 | 2 | 2 | 0  | 0 |
| 51 | 2 | 2 | 0  | 0 |
| 52 | 2 | 2 | 0  | 0 |
| 53 | 2 | 2 | 0  | 0 |
| 54 | 2 | 2 | 0  | 0 |
| 55 | 2 | 2 | 0  | 0 |
| 56 | 2 | 2 | 0  | 0 |
| 57 | 2 | 2 | 0  | 0 |
| 58 | 2 | 2 | 0  | 0 |
| 59 | 2 | 2 | 0  | 0 |
| 60 | 1 | 2 | 32 | 4 |

|    |   |   |    |   |
|----|---|---|----|---|
| 1  |   |   |    |   |
| 2  | 2 | 2 | 0  | 0 |
| 3  | 2 | 1 | 31 | 3 |
| 4  | 2 | 1 | 31 | 3 |
| 5  | 2 | 2 | 0  | 0 |
| 6  | 2 | 1 | 31 | 3 |
| 7  | 2 | 2 | 0  | 0 |
| 8  | 2 | 2 | 21 | 2 |
| 9  | 2 | 2 | 0  | 0 |
| 10 | 2 | 2 | 0  | 0 |
| 11 | 2 | 2 | 0  | 0 |
| 12 | 2 | 2 | 0  | 0 |
| 13 | 2 | 2 | 0  | 0 |
| 14 | 2 | 2 | 0  | 0 |
| 15 | 2 | 1 | 31 | 3 |
| 16 | 2 | 1 | 31 | 3 |
| 17 | 2 | 2 | 21 | 2 |
| 18 | 2 | 1 | 31 | 3 |
| 19 | 2 | 2 | 0  | 0 |
| 20 | 2 | 2 | 0  | 0 |
| 21 | 2 | 2 | 0  | 0 |
| 22 | 2 | 2 | 0  | 0 |
| 23 | 2 | 2 | 21 | 2 |
| 24 | 2 | 2 | 21 | 2 |
| 25 | 2 | 2 | 0  | 0 |
| 26 | 2 | 2 | 0  | 0 |
| 27 | 2 | 1 | 31 | 3 |
| 28 | 2 | 2 | 0  | 0 |
| 29 | 2 | 2 | 0  | 0 |
| 30 | 2 | 1 | 31 | 3 |
| 31 | 2 | 1 | 31 | 3 |
| 32 | 2 | 1 | 31 | 3 |
| 33 | 2 | 1 | 31 | 3 |
| 34 | 2 | 2 | 0  | 0 |
| 35 | 2 | 2 | 0  | 0 |
| 36 | 2 | 2 | 0  | 0 |
| 37 | 2 | 2 | 0  | 0 |
| 38 | 2 | 1 | 31 | 3 |
| 39 | 2 | 1 | 31 | 3 |
| 40 | 2 | 2 | 21 | 2 |
| 41 | 2 | 1 | 31 | 3 |
| 42 | 2 | 2 | 0  | 0 |
| 43 | 2 | 2 | 0  | 0 |
| 44 | 2 | 2 | 0  | 0 |
| 45 | 2 | 1 | 31 | 3 |
| 46 | 2 | 1 | 31 | 3 |
| 47 | 2 | 2 | 0  | 0 |
| 48 | 2 | 1 | 31 | 3 |
| 49 | 2 | 2 | 0  | 0 |
| 50 | 2 | 2 | 0  | 0 |
| 51 | 1 | 1 | 32 | 4 |
| 52 | 2 | 2 | 0  | 0 |
| 53 | 2 | 2 | 0  | 0 |
| 54 | 2 | 2 | 0  | 0 |
| 55 | 1 | 2 | 32 | 4 |
| 56 | 2 | 2 | 0  | 0 |
| 57 | 2 | 1 | 31 | 3 |
| 58 | 2 | 1 | 31 | 3 |
| 59 | 2 | 2 | 0  | 0 |
| 60 | 2 | 1 | 31 | 3 |

|    |   |   |    |   |
|----|---|---|----|---|
| 1  |   |   |    |   |
| 2  | 2 | 2 | 0  | 0 |
| 3  | 2 | 2 | 0  | 0 |
| 4  | 2 | 2 | 0  | 0 |
| 5  | 1 | 2 | 32 | 4 |
| 6  | 2 | 1 | 31 | 3 |
| 7  | 2 | 2 | 0  | 0 |
| 8  | 2 | 2 | 0  | 0 |
| 9  | 1 | 1 | 32 | 4 |
| 10 | 2 | 2 | 21 | 2 |
| 11 | 2 | 2 | 0  | 0 |
| 12 | 2 | 2 | 0  | 0 |
| 13 | 2 | 2 | 0  | 0 |
| 14 | 2 | 2 | 0  | 0 |
| 15 | 2 | 2 | 0  | 0 |
| 16 | 2 | 2 | 0  | 0 |
| 17 | 2 | 1 | 31 | 3 |
| 18 | 1 | 2 | 32 | 4 |
| 19 | 2 | 1 | 31 | 3 |
| 20 | 2 | 2 | 0  | 0 |
| 21 | 2 | 2 | 0  | 0 |
| 22 | 2 | 2 | 0  | 0 |
| 23 | 1 | 1 | 32 | 4 |
| 24 | 2 | 2 | 0  | 0 |
| 25 | 2 | 1 | 31 | 3 |
| 26 | 2 | 2 | 0  | 0 |
| 27 | 1 | 2 | 32 | 4 |
| 28 | 2 | 1 | 31 | 3 |
| 29 | 2 | 2 | 1  | 1 |
| 30 | 2 | 2 | 0  | 0 |
| 31 | 2 | 2 | 21 | 2 |
| 32 | 2 | 2 | 0  | 0 |
| 33 | 2 | 2 | 21 | 2 |
| 34 | 2 | 2 | 0  | 0 |
| 35 | 1 | 2 | 32 | 4 |
| 36 | 2 | 2 | 21 | 2 |
| 37 | 2 | 2 | 21 | 2 |
| 38 | 2 | 2 | 0  | 0 |
| 39 | 1 | 1 | 32 | 4 |
| 40 | 1 | 2 | 32 | 4 |
| 41 | 2 | 1 | 31 | 3 |
| 42 | 2 | 1 | 31 | 3 |
| 43 | 2 | 1 | 31 | 3 |
| 44 | 2 | 2 | 0  | 0 |
| 45 | 2 | 2 | 0  | 0 |
| 46 | 2 | 2 | 0  | 0 |
| 47 | 2 | 2 | 0  | 0 |
| 48 | 2 | 1 | 31 | 3 |
| 49 | 2 | 2 | 0  | 0 |
| 50 | 2 | 2 | 0  | 0 |
| 51 | 2 | 2 | 21 | 2 |
| 52 | 2 | 2 | 21 | 2 |
| 53 | 2 | 2 | 0  | 0 |
| 54 | 2 | 2 | 0  | 0 |
| 55 | 2 | 2 | 0  | 0 |
| 56 | 2 | 2 | 0  | 0 |
| 57 | 2 | 2 | 1  | 1 |
| 58 | 2 | 2 | 21 | 2 |
| 59 | 2 | 2 | 21 | 2 |
| 60 | 2 | 2 | 21 | 2 |



|    |   |   |    |   |
|----|---|---|----|---|
| 1  |   |   |    |   |
| 2  | 2 | 2 | 21 | 2 |
| 3  | 2 | 2 | 0  | 0 |
| 4  | 2 | 2 | 0  | 0 |
| 5  | 2 | 2 | 21 | 2 |
| 6  | 2 | 2 | 0  | 0 |
| 7  | 2 | 2 | 0  | 0 |
| 8  | 2 | 1 | 31 | 3 |
| 9  | 2 | 2 | 0  | 0 |
| 10 | 2 | 1 | 31 | 3 |
| 11 | 2 | 2 | 21 | 2 |
| 12 | 2 | 2 | 0  | 0 |
| 13 | 2 | 2 | 0  | 0 |
| 14 | 2 | 1 | 31 | 3 |
| 15 | 1 | 2 | 32 | 4 |
| 16 | 2 | 2 | 21 | 2 |
| 17 | 2 | 2 | 21 | 2 |
| 18 | 2 | 2 | 0  | 0 |
| 19 | 2 | 2 | 0  | 0 |
| 20 | 2 | 2 | 21 | 2 |
| 21 | 1 | 2 | 32 | 4 |
| 22 | 1 | 2 | 32 | 4 |
| 23 | 2 | 2 | 0  | 0 |
| 24 | 2 | 2 | 21 | 2 |
| 25 | 2 | 2 | 21 | 2 |
| 26 | 2 | 2 | 21 | 2 |
| 27 | 2 | 2 | 0  | 0 |
| 28 | 2 | 2 | 0  | 0 |
| 29 | 2 | 2 | 21 | 2 |
| 30 | 2 | 2 | 21 | 2 |
| 31 | 1 | 2 | 32 | 4 |
| 32 | 2 | 2 | 0  | 0 |
| 33 | 2 | 2 | 21 | 2 |
| 34 | 2 | 2 | 0  | 0 |
| 35 | 2 | 2 | 0  | 0 |
| 36 | 2 | 2 | 0  | 0 |
| 37 | 2 | 2 | 0  | 0 |
| 38 | 2 | 2 | 0  | 0 |
| 39 | 2 | 2 | 1  | 1 |
| 40 | 1 | 2 | 32 | 4 |
| 41 | 2 | 2 | 0  | 0 |
| 42 | 2 | 2 | 0  | 0 |
| 43 | 2 | 2 | 0  | 0 |
| 44 | 2 | 2 | 21 | 2 |
| 45 | 2 | 2 | 0  | 0 |
| 46 | 2 | 2 | 0  | 0 |
| 47 | 2 | 2 | 0  | 0 |
| 48 | 2 | 1 | 31 | 3 |
| 49 | 2 | 2 | 0  | 0 |
| 50 | 2 | 1 | 31 | 3 |
| 51 | 2 | 2 | 0  | 0 |
| 52 | 2 | 2 | 1  | 1 |
| 53 | 2 | 2 | 0  | 0 |
| 54 | 2 | 2 | 0  | 0 |
| 55 | 2 | 2 | 0  | 0 |
| 56 | 1 | 1 | 32 | 4 |
| 57 | 2 | 2 | 0  | 0 |
| 58 | 2 | 2 | 0  | 0 |
| 59 | 2 | 1 | 31 | 3 |
| 60 | 2 | 2 | 0  | 0 |

|    |   |   |    |   |
|----|---|---|----|---|
| 1  |   |   |    |   |
| 2  | 2 | 2 | 0  | 0 |
| 3  | 2 | 2 | 0  | 0 |
| 4  | 2 | 2 | 0  | 0 |
| 5  | 2 | 2 | 0  | 0 |
| 6  | 2 | 2 | 0  | 0 |
| 7  | 2 | 1 | 31 | 3 |
| 8  | 2 | 2 | 0  | 0 |
| 9  | 2 | 2 | 0  | 0 |
| 10 | 2 | 2 | 0  | 0 |
| 11 | 2 | 2 | 0  | 0 |
| 12 | 2 | 2 | 0  | 0 |
| 13 | 2 | 2 | 0  | 0 |
| 14 | 2 | 1 | 31 | 3 |
| 15 | 2 | 2 | 0  | 0 |
| 16 | 2 | 1 | 31 | 3 |
| 17 | 2 | 2 | 0  | 0 |
| 18 | 2 | 2 | 0  | 0 |
| 19 | 2 | 2 | 0  | 0 |
| 20 | 2 | 2 | 0  | 0 |
| 21 | 2 | 2 | 0  | 0 |
| 22 | 2 | 2 | 0  | 0 |
| 23 | 2 | 2 | 0  | 0 |
| 24 | 2 | 1 | 31 | 3 |
| 25 | 1 | 1 | 32 | 4 |
| 26 | 2 | 2 | 0  | 0 |
| 27 | 2 | 2 | 0  | 0 |
| 28 | 2 | 2 | 0  | 0 |
| 29 | 2 | 2 | 0  | 0 |
| 30 | 2 | 1 | 31 | 3 |
| 31 | 2 | 2 | 0  | 0 |
| 32 | 2 | 2 | 0  | 0 |
| 33 | 2 | 1 | 31 | 3 |
| 34 | 2 | 1 | 31 | 3 |
| 35 | 2 | 2 | 0  | 0 |
| 36 | 2 | 2 | 0  | 0 |
| 37 | 2 | 2 | 0  | 0 |
| 38 | 2 | 2 | 0  | 0 |
| 39 | 2 | 2 | 0  | 0 |
| 40 | 2 | 2 | 0  | 0 |
| 41 | 2 | 2 | 0  | 0 |
| 42 | 2 | 2 | 1  | 1 |
| 43 | 2 | 2 | 0  | 0 |
| 44 | 2 | 2 | 0  | 0 |
| 45 | 2 | 2 | 0  | 0 |
| 46 | 2 | 2 | 0  | 0 |
| 47 | 2 | 2 | 0  | 0 |
| 48 | 2 | 2 | 0  | 0 |
| 49 | 2 | 2 | 0  | 0 |
| 50 | 2 | 2 | 0  | 0 |
| 51 | 2 | 2 | 0  | 0 |
| 52 | 2 | 2 | 0  | 0 |
| 53 | 2 | 2 | 0  | 0 |
| 54 | 2 | 1 | 31 | 3 |
| 55 | 2 | 2 | 0  | 0 |
| 56 | 2 | 2 | 0  | 0 |
| 57 | 2 | 1 | 31 | 3 |
| 58 | 2 | 1 | 31 | 3 |
| 59 | 2 | 2 | 0  | 0 |
| 60 | 2 | 2 | 0  | 0 |

|    |   |   |    |   |
|----|---|---|----|---|
| 1  |   |   |    |   |
| 2  | 2 | 2 | 0  | 0 |
| 3  | 2 | 2 | 0  | 0 |
| 4  | 2 | 2 | 0  | 0 |
| 5  | 2 | 1 | 31 | 3 |
| 6  | 2 | 1 | 31 | 3 |
| 7  | 2 | 2 | 0  | 0 |
| 8  | 2 | 2 | 0  | 0 |
| 9  | 2 | 2 | 0  | 0 |
| 10 | 2 | 2 | 0  | 0 |
| 11 | 2 | 2 | 0  | 0 |
| 12 | 1 | 2 | 32 | 4 |
| 13 | 2 | 2 | 0  | 0 |
| 14 | 2 | 2 | 0  | 0 |
| 15 | 2 | 2 | 0  | 0 |
| 16 | 2 | 2 | 0  | 0 |
| 17 | 2 | 2 | 0  | 0 |
| 18 | 2 | 2 | 0  | 0 |
| 19 | 2 | 2 | 0  | 0 |
| 20 | 2 | 2 | 0  | 0 |
| 21 | 2 | 2 | 0  | 0 |
| 22 | 2 | 2 | 0  | 0 |
| 23 | 2 | 1 | 31 | 3 |
| 24 | 2 | 2 | 0  | 0 |
| 25 | 2 | 2 | 0  | 0 |
| 26 | 2 | 2 | 0  | 0 |
| 27 | 2 | 1 | 31 | 3 |
| 28 | 2 | 1 | 31 | 3 |
| 29 | 2 | 2 | 0  | 0 |
| 30 | 2 | 2 | 0  | 0 |
| 31 | 2 | 2 | 0  | 0 |
| 32 | 2 | 1 | 31 | 3 |
| 33 | 2 | 2 | 0  | 0 |
| 34 | 2 | 2 | 0  | 0 |
| 35 | 2 | 2 | 0  | 0 |
| 36 | 2 | 2 | 0  | 0 |
| 37 | 1 | 2 | 32 | 4 |
| 38 | 2 | 2 | 0  | 0 |
| 39 | 2 | 2 | 0  | 0 |
| 40 | 2 | 2 | 0  | 0 |
| 41 | 2 | 2 | 0  | 0 |
| 42 | 2 | 2 | 0  | 0 |
| 43 | 2 | 1 | 31 | 3 |
| 44 | 2 | 2 | 0  | 0 |
| 45 | 2 | 2 | 0  | 0 |
| 46 | 2 | 2 | 21 | 2 |
| 47 | 2 | 2 | 0  | 0 |
| 48 | 2 | 2 | 21 | 2 |
| 49 | 2 | 2 | 21 | 2 |
| 50 | 2 | 1 | 31 | 3 |
| 51 | 2 | 1 | 31 | 3 |
| 52 | 2 | 2 | 0  | 0 |
| 53 | 2 | 1 | 31 | 3 |
| 54 | 2 | 1 | 31 | 3 |
| 55 | 2 | 1 | 31 | 3 |
| 56 | 2 | 1 | 31 | 3 |
| 57 | 2 | 2 | 21 | 2 |
| 58 | 2 | 2 | 0  | 0 |
| 59 | 2 | 1 | 31 | 3 |
| 60 | 2 | 2 | 0  | 0 |

|    |   |   |    |   |
|----|---|---|----|---|
| 1  |   |   |    |   |
| 2  | 2 | 2 | 0  | 0 |
| 3  | 2 | 1 | 31 | 3 |
| 4  | 2 | 1 | 31 | 3 |
| 5  | 2 | 1 | 31 | 3 |
| 6  | 2 | 2 | 0  | 0 |
| 7  | 2 | 2 | 0  | 0 |
| 8  | 2 | 2 | 0  | 0 |
| 9  | 2 | 2 | 0  | 0 |
| 10 | 2 | 1 | 31 | 3 |
| 11 | 2 | 2 | 0  | 0 |
| 12 | 2 | 2 | 0  | 0 |
| 13 | 2 | 2 | 0  | 0 |
| 14 | 1 | 2 | 32 | 4 |
| 15 | 2 | 2 | 0  | 0 |
| 16 | 2 | 2 | 1  | 1 |
| 17 | 2 | 2 | 0  | 0 |
| 18 | 2 | 2 | 0  | 0 |
| 19 | 2 | 2 | 0  | 0 |
| 20 | 2 | 2 | 0  | 0 |
| 21 | 2 | 2 | 0  | 0 |
| 22 | 2 | 2 | 0  | 0 |
| 23 | 1 | 2 | 32 | 4 |
| 24 | 2 | 2 | 0  | 0 |
| 25 | 2 | 2 | 0  | 0 |
| 26 | 2 | 1 | 31 | 3 |
| 27 | 2 | 1 | 31 | 3 |
| 28 | 2 | 2 | 21 | 2 |
| 29 | 2 | 2 | 0  | 0 |
| 30 | 2 | 2 | 0  | 0 |
| 31 | 2 | 2 | 0  | 0 |
| 32 | 2 | 1 | 31 | 3 |
| 33 | 2 | 2 | 0  | 0 |
| 34 | 2 | 1 | 31 | 3 |
| 35 | 2 | 2 | 1  | 1 |
| 36 | 2 | 2 | 0  | 0 |
| 37 | 2 | 2 | 0  | 0 |
| 38 | 2 | 2 | 0  | 0 |
| 39 | 2 | 2 | 0  | 0 |
| 40 | 2 | 2 | 0  | 0 |
| 41 | 2 | 2 | 0  | 0 |
| 42 | 2 | 2 | 0  | 0 |
| 43 | 1 | 1 | 32 | 4 |
| 44 | 2 | 1 | 31 | 3 |
| 45 | 2 | 1 | 31 | 3 |
| 46 | 2 | 2 | 0  | 0 |
| 47 | 2 | 2 | 0  | 0 |
| 48 | 2 | 2 | 0  | 0 |
| 49 | 2 | 2 | 0  | 0 |
| 50 | 2 | 2 | 0  | 0 |
| 51 | 2 | 2 | 0  | 0 |
| 52 | 2 | 2 | 0  | 0 |
| 53 | 2 | 2 | 0  | 0 |
| 54 | 2 | 2 | 0  | 0 |
| 55 | 2 | 2 | 0  | 0 |
| 56 | 2 | 2 | 0  | 0 |
| 57 | 2 | 2 | 0  | 0 |
| 58 | 2 | 2 | 0  | 0 |
| 59 | 2 | 2 | 0  | 0 |
| 60 | 2 | 2 | 0  | 0 |
|    | 1 | 1 | 32 | 4 |

|    |   |   |    |   |
|----|---|---|----|---|
| 1  |   |   |    |   |
| 2  | 2 | 2 | 0  | 0 |
| 3  | 2 | 2 | 0  | 0 |
| 4  | 2 | 2 | 1  | 1 |
| 5  | 2 | 1 | 31 | 3 |
| 6  | 2 | 2 | 0  | 0 |
| 7  | 2 | 2 | 0  | 0 |
| 8  | 2 | 2 | 0  | 0 |
| 9  | 2 | 2 | 0  | 0 |
| 10 | 2 | 2 | 0  | 0 |
| 11 | 2 | 2 | 0  | 0 |
| 12 | 2 | 2 | 0  | 0 |
| 13 | 2 | 2 | 0  | 0 |
| 14 | 2 | 2 | 0  | 0 |
| 15 | 2 | 1 | 31 | 3 |
| 16 | 2 | 2 | 1  | 1 |
| 17 | 2 | 2 | 0  | 0 |
| 18 | 2 | 2 | 0  | 0 |
| 19 | 2 | 2 | 0  | 0 |
| 20 | 2 | 2 | 0  | 0 |
| 21 | 2 | 2 | 0  | 0 |
| 22 | 2 | 2 | 0  | 0 |
| 23 | 2 | 2 | 0  | 0 |
| 24 | 2 | 2 | 0  | 0 |
| 25 | 2 | 2 | 0  | 0 |
| 26 | 2 | 2 | 0  | 0 |
| 27 | 2 | 2 | 0  | 0 |
| 28 | 2 | 2 | 0  | 0 |
| 29 | 2 | 2 | 21 | 2 |
| 30 | 2 | 2 | 0  | 0 |
| 31 | 2 | 2 | 0  | 0 |
| 32 | 1 | 2 | 32 | 4 |
| 33 | 2 | 1 | 31 | 3 |
| 34 | 2 | 2 | 0  | 0 |
| 35 | 2 | 2 | 0  | 0 |
| 36 | 2 | 2 | 0  | 0 |
| 37 | 2 | 2 | 0  | 0 |
| 38 | 2 | 2 | 0  | 0 |
| 39 | 2 | 2 | 21 | 2 |
| 40 | 2 | 2 | 1  | 1 |
| 41 | 1 | 2 | 32 | 4 |
| 42 | 2 | 2 | 1  | 1 |
| 43 | 2 | 2 | 0  | 0 |
| 44 | 2 | 2 | 0  | 0 |
| 45 | 2 | 2 | 0  | 0 |
| 46 | 2 | 1 | 31 | 3 |
| 47 | 2 | 2 | 0  | 0 |
| 48 | 2 | 2 | 0  | 0 |
| 49 | 2 | 2 | 0  | 0 |
| 50 | 2 | 2 | 0  | 0 |
| 51 | 2 | 2 | 21 | 2 |
| 52 | 2 | 2 | 0  | 0 |
| 53 | 2 | 2 | 0  | 0 |
| 54 | 2 | 2 | 0  | 0 |
| 55 | 2 | 1 | 31 | 3 |
| 56 | 2 | 2 | 0  | 0 |
| 57 | 2 | 2 | 0  | 0 |
| 58 | 2 | 1 | 31 | 3 |
| 59 | 2 | 2 | 0  | 0 |
| 60 | 2 | 1 | 31 | 3 |

|    |   |   |    |   |
|----|---|---|----|---|
| 1  |   |   |    |   |
| 2  | 2 | 2 | 0  | 0 |
| 3  | 2 | 2 | 0  | 0 |
| 4  | 2 | 2 | 0  | 0 |
| 5  | 2 | 2 | 0  | 0 |
| 6  | 2 | 2 | 0  | 0 |
| 7  | 2 | 2 | 0  | 0 |
| 8  | 2 | 2 | 0  | 0 |
| 9  | 2 | 2 | 0  | 0 |
| 10 | 2 | 1 | 31 | 3 |
| 11 | 2 | 2 | 0  | 0 |
| 12 | 2 | 1 | 31 | 3 |
| 13 | 2 | 2 | 1  | 1 |
| 14 | 2 | 2 | 0  | 0 |
| 15 | 2 | 2 | 0  | 0 |
| 16 | 2 | 1 | 31 | 3 |
| 17 | 2 | 2 | 0  | 0 |
| 18 | 1 | 2 | 32 | 4 |
| 19 | 2 | 1 | 31 | 3 |
| 20 | 2 | 2 | 21 | 2 |
| 21 | 2 | 2 | 0  | 0 |
| 22 | 2 | 2 | 0  | 0 |
| 23 | 2 | 1 | 31 | 3 |
| 24 | 2 | 2 | 0  | 0 |
| 25 | 2 | 2 | 0  | 0 |
| 26 | 2 | 2 | 0  | 0 |
| 27 | 2 | 2 | 21 | 2 |
| 28 | 2 | 2 | 0  | 0 |
| 29 | 2 | 2 | 0  | 0 |
| 30 | 2 | 2 | 0  | 0 |
| 31 | 2 | 2 | 0  | 0 |
| 32 | 2 | 2 | 0  | 0 |
| 33 | 2 | 2 | 0  | 0 |
| 34 | 2 | 1 | 31 | 3 |
| 35 | 2 | 1 | 31 | 3 |
| 36 | 2 | 2 | 0  | 0 |
| 37 | 1 | 2 | 32 | 4 |
| 38 | 2 | 2 | 22 | 2 |
| 39 | 2 | 2 | 0  | 0 |
| 40 | 2 | 2 | 0  | 0 |
| 41 | 2 | 2 | 0  | 0 |
| 42 | 2 | 2 | 0  | 0 |
| 43 | 2 | 2 | 0  | 0 |
| 44 | 2 | 2 | 21 | 2 |
| 45 | 2 | 1 | 31 | 3 |
| 46 | 2 | 2 | 0  | 0 |
| 47 | 2 | 1 | 31 | 3 |
| 48 | 2 | 2 | 0  | 0 |
| 49 | 2 | 1 | 31 | 3 |
| 50 | 2 | 1 | 31 | 3 |
| 51 | 2 | 1 | 31 | 3 |
| 52 | 2 | 2 | 0  | 0 |
| 53 | 2 | 2 | 0  | 0 |
| 54 | 2 | 2 | 0  | 0 |
| 55 | 2 | 2 | 0  | 0 |
| 56 | 2 | 1 | 31 | 3 |
| 57 | 2 | 1 | 31 | 3 |
| 58 | 2 | 1 | 31 | 3 |
| 59 | 2 | 1 | 31 | 3 |
| 60 | 2 | 2 | 21 | 2 |

|    |   |   |    |   |
|----|---|---|----|---|
| 1  |   |   |    |   |
| 2  | 2 | 2 | 0  | 0 |
| 3  | 1 | 2 | 32 | 4 |
| 4  | 2 | 2 | 21 | 2 |
| 5  | 2 | 2 | 0  | 0 |
| 6  | 2 | 1 | 31 | 3 |
| 7  | 2 | 1 | 31 | 3 |
| 8  | 2 | 2 | 0  | 0 |
| 9  | 2 | 2 | 0  | 0 |
| 10 | 2 | 2 | 0  | 0 |
| 11 | 2 | 1 | 31 | 3 |
| 12 | 2 | 2 | 21 | 2 |
| 13 | 2 | 2 | 0  | 0 |
| 14 | 2 | 2 | 0  | 0 |
| 15 | 2 | 2 | 0  | 0 |
| 16 | 2 | 2 | 0  | 0 |
| 17 | 2 | 1 | 31 | 3 |
| 18 | 2 | 2 | 21 | 2 |
| 19 | 2 | 2 | 0  | 0 |
| 20 | 2 | 2 | 0  | 0 |
| 21 | 2 | 2 | 0  | 0 |
| 22 | 2 | 1 | 31 | 3 |
| 23 | 2 | 1 | 31 | 3 |
| 24 | 2 | 2 | 0  | 0 |
| 25 | 2 | 2 | 0  | 0 |
| 26 | 2 | 2 | 0  | 0 |
| 27 | 2 | 1 | 31 | 3 |
| 28 | 2 | 1 | 31 | 3 |
| 29 | 2 | 2 | 21 | 2 |
| 30 | 2 | 1 | 31 | 3 |
| 31 | 2 | 1 | 31 | 3 |
| 32 | 2 | 1 | 31 | 3 |
| 33 | 2 | 2 | 0  | 0 |
| 34 | 2 | 2 | 0  | 0 |
| 35 | 2 | 2 | 0  | 0 |
| 36 | 2 | 2 | 0  | 0 |
| 37 | 2 | 2 | 0  | 0 |
| 38 | 2 | 1 | 31 | 3 |
| 39 | 2 | 1 | 31 | 3 |
| 40 | 2 | 2 | 21 | 2 |
| 41 | 2 | 1 | 31 | 3 |
| 42 | 2 | 2 | 0  | 0 |
| 43 | 2 | 2 | 0  | 0 |
| 44 | 2 | 2 | 0  | 0 |
| 45 | 2 | 1 | 31 | 3 |
| 46 | 2 | 1 | 31 | 3 |
| 47 | 2 | 2 | 21 | 2 |
| 48 | 2 | 2 | 0  | 0 |
| 49 | 2 | 2 | 0  | 0 |
| 50 | 2 | 1 | 31 | 3 |
| 51 | 2 | 2 | 0  | 0 |
| 52 | 2 | 2 | 21 | 2 |
| 53 | 2 | 1 | 31 | 3 |
| 54 | 2 | 1 | 31 | 3 |
| 55 | 2 | 1 | 31 | 3 |
| 56 | 2 | 1 | 31 | 3 |
| 57 | 2 | 1 | 31 | 3 |
| 58 | 2 | 1 | 31 | 3 |
| 59 | 2 | 1 | 31 | 3 |
| 60 | 2 | 2 | 0  | 0 |

|    |   |   |    |   |
|----|---|---|----|---|
| 1  |   |   |    |   |
| 2  | 2 | 2 | 1  | 1 |
| 3  | 2 | 2 | 0  | 0 |
| 4  | 2 | 2 | 0  | 0 |
| 5  | 2 | 1 | 31 | 3 |
| 6  | 2 | 1 | 31 | 3 |
| 7  | 2 | 2 | 0  | 0 |
| 8  | 2 | 2 | 0  | 0 |
| 9  | 1 | 2 | 32 | 4 |
| 10 | 2 | 1 | 31 | 3 |
| 11 | 2 | 2 | 0  | 0 |
| 12 | 1 | 1 | 32 | 4 |
| 13 | 2 | 2 | 0  | 0 |
| 14 | 2 | 2 | 21 | 2 |
| 15 | 2 | 1 | 31 | 3 |
| 16 | 2 | 2 | 0  | 0 |
| 17 | 2 | 2 | 0  | 0 |
| 18 | 2 | 2 | 0  | 0 |
| 19 | 2 | 1 | 31 | 3 |
| 20 | 1 | 1 | 32 | 4 |
| 21 | 2 | 1 | 31 | 3 |
| 22 | 2 | 2 | 0  | 0 |
| 23 | 2 | 2 | 0  | 0 |
| 24 | 1 | 2 | 32 | 4 |
| 25 | 2 | 2 | 0  | 0 |
| 26 | 2 | 2 | 0  | 0 |
| 27 | 2 | 2 | 0  | 0 |
| 28 | 2 | 2 | 21 | 2 |
| 29 | 2 | 2 | 0  | 0 |
| 30 | 2 | 1 | 31 | 3 |
| 31 | 2 | 2 | 0  | 0 |
| 32 | 2 | 1 | 31 | 3 |
| 33 | 2 | 1 | 31 | 3 |
| 34 | 2 | 2 | 0  | 0 |
| 35 | 2 | 2 | 0  | 0 |
| 36 | 2 | 2 | 0  | 0 |
| 37 | 2 | 2 | 0  | 0 |
| 38 | 2 | 2 | 0  | 0 |
| 39 | 2 | 1 | 31 | 3 |
| 40 | 2 | 2 | 0  | 0 |
| 41 | 2 | 2 | 0  | 0 |
| 42 | 2 | 2 | 0  | 0 |
| 43 | 2 | 2 | 0  | 0 |
| 44 | 2 | 2 | 0  | 0 |
| 45 | 2 | 2 | 0  | 0 |
| 46 | 2 | 2 | 0  | 0 |
| 47 | 2 | 2 | 0  | 0 |
| 48 | 2 | 2 | 0  | 0 |
| 49 | 1 | 1 | 32 | 4 |
| 50 | 2 | 1 | 31 | 3 |
| 51 | 2 | 2 | 0  | 0 |
| 52 | 2 | 2 | 0  | 0 |
| 53 | 2 | 2 | 0  | 0 |
| 54 | 2 | 2 | 0  | 0 |
| 55 | 2 | 2 | 0  | 0 |
| 56 | 2 | 1 | 31 | 3 |
| 57 | 2 | 2 | 21 | 2 |
| 58 | 2 | 2 | 0  | 0 |
| 59 | 2 | 2 | 0  | 0 |
| 60 | 2 | 2 | 1  | 1 |



|    |   |   |    |   |
|----|---|---|----|---|
| 1  |   |   |    |   |
| 2  | 2 | 1 | 31 | 3 |
| 3  | 2 | 2 | 0  | 0 |
| 4  | 2 | 1 | 31 | 3 |
| 5  | 2 | 1 | 31 | 3 |
| 6  | 2 | 1 | 31 | 3 |
| 7  | 2 | 1 | 31 | 3 |
| 8  | 2 | 1 | 31 | 3 |
| 9  | 2 | 2 | 0  | 0 |
| 10 | 2 | 1 | 31 | 3 |
| 11 | 2 | 2 | 0  | 0 |
| 12 | 2 | 2 | 0  | 0 |
| 13 | 2 | 2 | 0  | 0 |
| 14 | 2 | 2 | 21 | 2 |
| 15 | 2 | 2 | 0  | 0 |
| 16 | 2 | 1 | 31 | 3 |
| 17 | 2 | 1 | 31 | 3 |
| 18 | 2 | 2 | 0  | 0 |
| 19 | 2 | 2 | 0  | 0 |
| 20 | 2 | 2 | 0  | 0 |
| 21 | 2 | 2 | 0  | 0 |
| 22 | 2 | 2 | 0  | 0 |
| 23 | 1 | 2 | 32 | 4 |
| 24 | 2 | 2 | 0  | 0 |
| 25 | 2 | 2 | 0  | 0 |
| 26 | 2 | 2 | 0  | 0 |
| 27 | 2 | 2 | 0  | 0 |
| 28 | 2 | 2 | 22 | 2 |
| 29 | 1 | 2 | 32 | 4 |
| 30 | 2 | 2 | 0  | 0 |
| 31 | 2 | 1 | 31 | 3 |
| 32 | 1 | 1 | 32 | 4 |
| 33 | 2 | 1 | 31 | 3 |
| 34 | 2 | 2 | 0  | 0 |
| 35 | 2 | 2 | 0  | 0 |
| 36 | 2 | 2 | 0  | 0 |
| 37 | 2 | 1 | 31 | 3 |
| 38 | 2 | 2 | 0  | 0 |
| 39 | 2 | 2 | 0  | 0 |
| 40 | 2 | 2 | 0  | 0 |
| 41 | 2 | 1 | 31 | 3 |
| 42 | 2 | 2 | 0  | 0 |
| 43 | 1 | 2 | 32 | 4 |
| 44 | 2 | 2 | 0  | 0 |
| 45 | 2 | 2 | 21 | 2 |
| 46 | 2 | 2 | 0  | 0 |
| 47 | 2 | 2 | 21 | 2 |
| 48 | 2 | 2 | 21 | 2 |
| 49 | 2 | 2 | 21 | 2 |
| 50 | 2 | 2 | 0  | 0 |
| 51 | 1 | 2 | 32 | 4 |
| 52 | 2 | 2 | 0  | 0 |
| 53 | 2 | 2 | 21 | 2 |
| 54 | 2 | 2 | 0  | 0 |
| 55 | 2 | 1 | 31 | 3 |
| 56 | 2 | 2 | 0  | 0 |
| 57 | 1 | 2 | 32 | 4 |
| 58 | 2 | 2 | 0  | 0 |
| 59 | 2 | 2 | 0  | 0 |
| 60 | 1 | 2 | 32 | 4 |

|    |   |   |    |   |
|----|---|---|----|---|
| 1  |   |   |    |   |
| 2  | 2 | 2 | 21 | 2 |
| 3  | 2 | 2 | 0  | 0 |
| 4  | 2 | 1 | 31 | 3 |
| 5  | 2 | 1 | 31 | 3 |
| 6  | 2 | 1 | 31 | 3 |
| 7  | 2 | 2 | 0  | 0 |
| 8  | 2 | 2 | 0  | 0 |
| 9  | 2 | 2 | 0  | 0 |
| 10 | 2 | 1 | 31 | 3 |
| 11 | 2 | 1 | 31 | 3 |
| 12 | 2 | 2 | 0  | 0 |
| 13 | 2 | 2 | 0  | 0 |
| 14 | 2 | 2 | 0  | 0 |
| 15 | 2 | 1 | 31 | 3 |
| 16 | 2 | 2 | 21 | 2 |
| 17 | 2 | 1 | 31 | 3 |
| 18 | 2 | 2 | 21 | 2 |
| 19 | 2 | 1 | 31 | 3 |
| 20 | 2 | 2 | 21 | 2 |
| 21 | 2 | 2 | 0  | 0 |
| 22 | 2 | 2 | 21 | 2 |
| 23 | 2 | 2 | 21 | 2 |
| 24 | 2 | 1 | 31 | 3 |
| 25 | 2 | 2 | 0  | 0 |
| 26 | 2 | 2 | 0  | 0 |
| 27 | 2 | 1 | 31 | 3 |
| 28 | 2 | 2 | 0  | 0 |
| 29 | 2 | 2 | 0  | 0 |
| 30 | 2 | 2 | 0  | 0 |
| 31 | 2 | 2 | 0  | 0 |
| 32 | 2 | 2 | 0  | 0 |
| 33 | 2 | 1 | 31 | 3 |
| 34 | 2 | 2 | 0  | 0 |
| 35 | 2 | 1 | 31 | 3 |
| 36 | 2 | 2 | 0  | 0 |
| 37 | 2 | 2 | 0  | 0 |
| 38 | 2 | 2 | 0  | 0 |
| 39 | 2 | 2 | 0  | 0 |
| 40 | 2 | 1 | 31 | 3 |
| 41 | 2 | 2 | 0  | 0 |
| 42 | 2 | 2 | 0  | 0 |
| 43 | 2 | 2 | 21 | 2 |
| 44 | 2 | 1 | 31 | 3 |
| 45 | 2 | 2 | 21 | 2 |
| 46 | 2 | 1 | 31 | 3 |
| 47 | 1 | 1 | 32 | 4 |
| 48 | 2 | 2 | 0  | 0 |
| 49 | 1 | 1 | 32 | 4 |
| 50 | 2 | 2 | 0  | 0 |
| 51 | 2 | 2 | 0  | 0 |
| 52 | 1 | 2 | 32 | 4 |
| 53 | 2 | 2 | 21 | 2 |
| 54 | 2 | 1 | 31 | 3 |
| 55 | 2 | 2 | 0  | 0 |
| 56 | 2 | 2 | 0  | 0 |
| 57 | 2 | 2 | 0  | 0 |
| 58 | 2 | 1 | 31 | 3 |
| 59 | 2 | 2 | 0  | 0 |
| 60 | 1 | 2 | 32 | 4 |

|    |   |   |    |   |
|----|---|---|----|---|
| 1  |   |   |    |   |
| 2  | 1 | 1 | 32 | 4 |
| 3  | 2 | 2 | 0  | 0 |
| 4  | 2 | 1 | 31 | 3 |
| 5  | 2 | 2 | 0  | 0 |
| 6  | 2 | 2 | 0  | 0 |
| 7  | 2 | 2 | 0  | 0 |
| 8  | 2 | 2 | 21 | 2 |
| 9  | 2 | 1 | 31 | 3 |
| 10 | 2 | 1 | 31 | 3 |
| 11 | 1 | 2 | 32 | 4 |
| 12 | 2 | 2 | 0  | 0 |
| 13 | 2 | 2 | 0  | 0 |
| 14 | 2 | 2 | 0  | 0 |
| 15 | 2 | 2 | 0  | 0 |
| 16 | 2 | 2 | 0  | 0 |
| 17 | 2 | 2 | 0  | 0 |
| 18 | 2 | 2 | 21 | 2 |
| 19 | 2 | 2 | 21 | 2 |
| 20 | 2 | 1 | 31 | 3 |
| 21 | 1 | 2 | 32 | 4 |
| 22 | 2 | 2 | 0  | 0 |
| 23 | 1 | 2 | 32 | 4 |
| 24 | 2 | 2 | 0  | 0 |
| 25 | 2 | 2 | 0  | 0 |
| 26 | 2 | 2 | 0  | 0 |
| 27 | 2 | 2 | 21 | 2 |
| 28 | 2 | 2 | 0  | 0 |
| 29 | 2 | 1 | 31 | 3 |
| 30 | 2 | 1 | 31 | 3 |
| 31 | 2 | 1 | 31 | 3 |
| 32 | 2 | 1 | 31 | 3 |
| 33 | 2 | 1 | 31 | 3 |
| 34 | 2 | 2 | 0  | 0 |
| 35 | 2 | 2 | 0  | 0 |
| 36 | 2 | 2 | 0  | 0 |
| 37 | 2 | 2 | 0  | 0 |
| 38 | 2 | 1 | 31 | 3 |
| 39 | 2 | 2 | 0  | 0 |
| 40 | 2 | 2 | 0  | 0 |
| 41 | 1 | 2 | 32 | 4 |
| 42 | 2 | 2 | 0  | 0 |
| 43 | 2 | 2 | 0  | 0 |
| 44 | 2 | 2 | 0  | 0 |
| 45 | 2 | 2 | 0  | 0 |
| 46 | 2 | 2 | 0  | 0 |
| 47 | 2 | 2 | 0  | 0 |
| 48 | 2 | 2 | 0  | 0 |
| 49 | 1 | 2 | 32 | 4 |
| 50 | 2 | 2 | 0  | 0 |
| 51 | 2 | 2 | 0  | 0 |
| 52 | 2 | 2 | 0  | 0 |
| 53 | 2 | 2 | 0  | 0 |
| 54 | 2 | 2 | 0  | 0 |
| 55 | 2 | 2 | 0  | 0 |
| 56 | 2 | 2 | 0  | 0 |
| 57 | 2 | 2 | 0  | 0 |
| 58 | 2 | 1 | 31 | 3 |
| 59 | 1 | 1 | 32 | 4 |
| 60 | 2 | 2 | 0  | 0 |

|    |   |   |    |   |
|----|---|---|----|---|
| 1  |   |   |    |   |
| 2  | 2 | 2 | 0  | 0 |
| 3  | 2 | 2 | 0  | 0 |
| 4  | 2 | 1 | 31 | 3 |
| 5  | 2 | 2 | 0  | 0 |
| 6  | 2 | 2 | 0  | 0 |
| 7  | 2 | 2 | 0  | 0 |
| 8  | 2 | 2 | 0  | 0 |
| 9  | 2 | 2 | 1  | 1 |
| 10 | 2 | 2 | 0  | 0 |
| 11 | 2 | 2 | 0  | 0 |
| 12 | 2 | 1 | 31 | 3 |
| 13 | 2 | 2 | 0  | 0 |
| 14 | 2 | 2 | 0  | 0 |
| 15 | 2 | 2 | 0  | 0 |
| 16 | 2 | 1 | 31 | 3 |
| 17 | 2 | 1 | 31 | 3 |
| 18 | 2 | 2 | 0  | 0 |
| 19 | 2 | 1 | 31 | 3 |
| 20 | 2 | 2 | 0  | 0 |
| 21 | 2 | 2 | 0  | 0 |
| 22 | 1 | 2 | 32 | 4 |
| 23 | 2 | 2 | 0  | 0 |
| 24 | 2 | 2 | 21 | 2 |
| 25 | 2 | 2 | 21 | 2 |
| 26 | 2 | 2 | 0  | 0 |
| 27 | 2 | 1 | 31 | 3 |
| 28 | 1 | 2 | 32 | 4 |
| 29 | 2 | 2 | 0  | 0 |
| 30 | 2 | 2 | 0  | 0 |
| 31 | 2 | 2 | 0  | 0 |
| 32 | 2 | 2 | 0  | 0 |
| 33 | 1 | 1 | 32 | 4 |
| 34 | 2 | 1 | 31 | 3 |
| 35 | 2 | 2 | 0  | 0 |
| 36 | 2 | 2 | 0  | 0 |
| 37 | 2 | 2 | 0  | 0 |
| 38 | 2 | 2 | 0  | 0 |
| 39 | 2 | 2 | 0  | 0 |
| 40 | 2 | 2 | 0  | 0 |
| 41 | 2 | 1 | 31 | 3 |
| 42 | 2 | 2 | 0  | 0 |
| 43 | 2 | 2 | 0  | 0 |
| 44 | 2 | 2 | 0  | 0 |
| 45 | 2 | 2 | 21 | 2 |
| 46 | 2 | 2 | 21 | 2 |
| 47 | 2 | 1 | 31 | 3 |
| 48 | 2 | 2 | 0  | 0 |
| 49 | 2 | 2 | 0  | 0 |
| 50 | 2 | 2 | 0  | 0 |
| 51 | 2 | 2 | 0  | 0 |
| 52 | 2 | 2 | 0  | 0 |
| 53 | 2 | 2 | 0  | 0 |
| 54 | 2 | 2 | 0  | 0 |
| 55 | 2 | 2 | 0  | 0 |
| 56 | 2 | 1 | 31 | 3 |
| 57 | 1 | 2 | 32 | 4 |
| 58 | 2 | 2 | 0  | 0 |
| 59 | 2 | 1 | 31 | 3 |
| 60 | 2 | 2 | 0  | 0 |

|    |   |   |    |   |
|----|---|---|----|---|
| 1  |   |   |    |   |
| 2  | 2 | 2 | 0  | 0 |
| 3  | 2 | 2 | 0  | 0 |
| 4  | 2 | 2 | 0  | 0 |
| 5  | 2 | 2 | 0  | 0 |
| 6  | 2 | 2 | 0  | 0 |
| 7  | 2 | 2 | 0  | 0 |
| 8  | 2 | 2 | 0  | 0 |
| 9  | 2 | 2 | 0  | 0 |
| 10 | 2 | 2 | 0  | 0 |
| 11 | 2 | 1 | 31 | 3 |
| 12 | 2 | 1 | 31 | 3 |
| 13 | 2 | 2 | 21 | 2 |
| 14 | 2 | 2 | 0  | 0 |
| 15 | 2 | 2 | 0  | 0 |
| 16 | 2 | 2 | 0  | 0 |
| 17 | 2 | 2 | 0  | 0 |
| 18 | 2 | 2 | 0  | 0 |
| 19 | 2 | 2 | 0  | 0 |
| 20 | 2 | 2 | 0  | 0 |
| 21 | 2 | 1 | 31 | 3 |
| 22 | 2 | 2 | 21 | 2 |
| 23 | 2 | 1 | 31 | 3 |
| 24 | 2 | 1 | 31 | 3 |
| 25 | 2 | 2 | 0  | 0 |
| 26 | 2 | 2 | 0  | 0 |
| 27 | 2 | 2 | 0  | 0 |
| 28 | 2 | 1 | 31 | 3 |
| 29 | 2 | 2 | 0  | 0 |
| 30 | 2 | 2 | 0  | 0 |
| 31 | 2 | 2 | 0  | 0 |
| 32 | 2 | 2 | 0  | 0 |
| 33 | 2 | 2 | 0  | 0 |
| 34 | 2 | 2 | 21 | 2 |
| 35 | 2 | 2 | 21 | 2 |
| 36 | 2 | 2 | 0  | 0 |
| 37 | 2 | 2 | 21 | 2 |
| 38 | 2 | 2 | 0  | 0 |
| 39 | 2 | 2 | 0  | 0 |
| 40 | 2 | 2 | 0  | 0 |
| 41 | 2 | 1 | 31 | 3 |
| 42 | 2 | 2 | 0  | 0 |
| 43 | 2 | 1 | 31 | 3 |
| 44 | 2 | 2 | 0  | 0 |
| 45 | 2 | 1 | 31 | 3 |
| 46 | 2 | 1 | 31 | 3 |
| 47 | 2 | 1 | 31 | 3 |
| 48 | 2 | 1 | 31 | 3 |
| 49 | 2 | 2 | 21 | 2 |
| 50 | 2 | 1 | 31 | 3 |
| 51 | 2 | 2 | 21 | 2 |
| 52 | 2 | 2 | 0  | 0 |
| 53 | 2 | 2 | 21 | 2 |
| 54 | 2 | 2 | 21 | 2 |
| 55 | 2 | 2 | 0  | 0 |
| 56 | 2 | 2 | 21 | 2 |
| 57 | 2 | 2 | 0  | 0 |
| 58 | 2 | 2 | 21 | 2 |
| 59 | 2 | 2 | 0  | 0 |
| 60 | 2 | 2 | 0  | 0 |

|    |   |   |    |   |
|----|---|---|----|---|
| 1  |   |   |    |   |
| 2  | 2 | 1 | 31 | 3 |
| 3  | 2 | 2 | 0  | 0 |
| 4  | 2 | 2 | 0  | 0 |
| 5  | 2 | 2 | 0  | 0 |
| 6  | 2 | 2 | 0  | 0 |
| 7  | 2 | 2 | 0  | 0 |
| 8  | 2 | 2 | 1  | 1 |
| 9  | 2 | 2 | 0  | 0 |
| 10 | 2 | 2 | 0  | 0 |
| 11 | 2 | 2 | 21 | 2 |
| 12 | 1 | 2 | 32 | 4 |
| 13 | 2 | 2 | 0  | 0 |
| 14 | 2 | 2 | 22 | 2 |
| 15 | 2 | 1 | 31 | 3 |
| 16 | 2 | 2 | 0  | 0 |
| 17 | 2 | 2 | 0  | 0 |
| 18 | 1 | 1 | 32 | 4 |
| 19 | 2 | 2 | 1  | 1 |
| 20 | 2 | 2 | 0  | 0 |
| 21 | 2 | 2 | 0  | 0 |
| 22 | 2 | 2 | 0  | 0 |
| 23 | 2 | 2 | 0  | 0 |
| 24 | 2 | 2 | 0  | 0 |
| 25 | 2 | 1 | 31 | 3 |
| 26 | 2 | 2 | 0  | 0 |
| 27 | 2 | 2 | 0  | 0 |
| 28 | 1 | 2 | 32 | 4 |
| 29 | 2 | 2 | 0  | 0 |
| 30 | 2 | 2 | 0  | 0 |
| 31 | 2 | 2 | 0  | 0 |
| 32 | 2 | 2 | 1  | 1 |
| 33 | 2 | 2 | 0  | 0 |
| 34 | 2 | 2 | 0  | 0 |
| 35 | 2 | 2 | 0  | 0 |
| 36 | 2 | 2 | 0  | 0 |
| 37 | 2 | 2 | 0  | 0 |
| 38 | 2 | 2 | 0  | 0 |
| 39 | 2 | 2 | 0  | 0 |
| 40 | 2 | 2 | 1  | 1 |
| 41 | 2 | 2 | 1  | 1 |
| 42 | 2 | 2 | 1  | 1 |
| 43 | 2 | 2 | 0  | 0 |
| 44 | 2 | 2 | 0  | 0 |
| 45 | 2 | 2 | 0  | 0 |
| 46 | 2 | 2 | 0  | 0 |
| 47 | 2 | 2 | 1  | 1 |
| 48 | 2 | 1 | 31 | 3 |
| 49 | 2 | 2 | 0  | 0 |
| 50 | 2 | 2 | 1  | 1 |
| 51 | 2 | 2 | 21 | 2 |
| 52 | 2 | 1 | 31 | 3 |
| 53 | 2 | 2 | 0  | 0 |
| 54 | 2 | 2 | 0  | 0 |
| 55 | 2 | 2 | 0  | 0 |
| 56 | 2 | 2 | 0  | 0 |
| 57 | 2 | 2 | 0  | 0 |
| 58 | 2 | 2 | 21 | 2 |
| 59 | 2 | 1 | 31 | 3 |
| 60 | 2 | 2 | 0  | 0 |

|    |   |   |    |   |
|----|---|---|----|---|
| 1  |   |   |    |   |
| 2  | 2 | 2 | 21 | 2 |
| 3  | 2 | 2 | 0  | 0 |
| 4  | 2 | 2 | 0  | 0 |
| 5  | 2 | 2 | 0  | 0 |
| 6  | 2 | 2 | 1  | 1 |
| 7  | 2 | 2 | 1  | 1 |
| 8  | 2 | 1 | 31 | 3 |
| 9  | 2 | 2 | 0  | 0 |
| 10 | 2 | 2 | 0  | 0 |
| 11 | 1 | 2 | 32 | 4 |
| 12 | 2 | 1 | 31 | 3 |
| 13 | 2 | 1 | 31 | 3 |
| 14 | 2 | 2 | 0  | 0 |
| 15 | 2 | 2 | 0  | 0 |
| 16 | 2 | 2 | 0  | 0 |
| 17 | 2 | 2 | 21 | 2 |
| 18 | 2 | 2 | 0  | 0 |
| 19 | 2 | 2 | 0  | 0 |
| 20 | 2 | 2 | 0  | 0 |
| 21 | 2 | 2 | 0  | 0 |
| 22 | 1 | 2 | 32 | 4 |
| 23 | 2 | 1 | 31 | 3 |
| 24 | 2 | 2 | 21 | 2 |
| 25 | 2 | 2 | 1  | 1 |
| 26 | 2 | 2 | 0  | 0 |
| 27 | 2 | 2 | 0  | 0 |
| 28 | 2 | 2 | 0  | 0 |
| 29 | 2 | 2 | 0  | 0 |
| 30 | 2 | 2 | 21 | 2 |
| 31 | 2 | 2 | 1  | 1 |
| 32 | 2 | 2 | 0  | 0 |
| 33 | 2 | 2 | 21 | 2 |
| 34 | 2 | 2 | 0  | 0 |
| 35 | 2 | 2 | 0  | 0 |
| 36 | 2 | 2 | 0  | 0 |
| 37 | 2 | 2 | 0  | 0 |
| 38 | 1 | 2 | 32 | 4 |
| 39 | 2 | 2 | 0  | 0 |
| 40 | 2 | 2 | 21 | 2 |
| 41 | 2 | 2 | 21 | 2 |
| 42 | 2 | 2 | 21 | 2 |
| 43 | 2 | 1 | 31 | 3 |
| 44 | 2 | 2 | 0  | 0 |
| 45 | 2 | 2 | 0  | 0 |
| 46 | 2 | 1 | 31 | 3 |
| 47 | 2 | 2 | 21 | 2 |
| 48 | 2 | 2 | 0  | 0 |
| 49 | 2 | 2 | 0  | 0 |
| 50 | 2 | 1 | 31 | 3 |
| 51 | 2 | 2 | 21 | 2 |
| 52 | 2 | 2 | 0  | 0 |
| 53 | 2 | 2 | 0  | 0 |
| 54 | 2 | 2 | 0  | 0 |
| 55 | 2 | 2 | 21 | 2 |
| 56 | 2 | 2 | 0  | 0 |
| 57 | 2 | 2 | 0  | 0 |
| 58 | 2 | 2 | 0  | 0 |
| 59 | 2 | 1 | 31 | 3 |
| 60 | 2 | 1 | 31 | 3 |

|    |   |   |    |   |
|----|---|---|----|---|
| 1  |   |   |    |   |
| 2  | 2 | 2 | 21 | 2 |
| 3  | 2 | 2 | 0  | 0 |
| 4  | 2 | 2 | 21 | 2 |
| 5  | 2 | 2 | 21 | 2 |
| 6  | 2 | 2 | 21 | 2 |
| 7  | 2 | 2 | 21 | 2 |
| 8  | 2 | 2 | 0  | 0 |
| 9  | 2 | 1 | 31 | 3 |
| 10 | 2 | 2 | 0  | 0 |
| 11 | 1 | 2 | 32 | 4 |
| 12 | 2 | 1 | 31 | 3 |
| 13 | 2 | 2 | 0  | 0 |
| 14 | 2 | 2 | 21 | 2 |
| 15 | 2 | 2 | 0  | 0 |
| 16 | 2 | 2 | 0  | 0 |
| 17 | 2 | 2 | 0  | 0 |
| 18 | 2 | 2 | 0  | 0 |
| 19 | 2 | 2 | 0  | 0 |
| 20 | 2 | 2 | 0  | 0 |
| 21 | 2 | 2 | 0  | 0 |
| 22 | 2 | 2 | 21 | 2 |
| 23 | 2 | 1 | 31 | 3 |
| 24 | 2 | 2 | 21 | 2 |
| 25 | 2 | 1 | 31 | 3 |
| 26 | 2 | 2 | 21 | 2 |
| 27 | 2 | 1 | 31 | 3 |
| 28 | 2 | 2 | 21 | 2 |
| 29 | 2 | 2 | 0  | 0 |
| 30 | 2 | 2 | 0  | 0 |
| 31 | 2 | 1 | 31 | 3 |
| 32 | 2 | 2 | 0  | 0 |
| 33 | 2 | 2 | 0  | 0 |
| 34 | 2 | 2 | 0  | 0 |
| 35 | 2 | 2 | 0  | 0 |
| 36 | 2 | 2 | 0  | 0 |
| 37 | 2 | 2 | 0  | 0 |
| 38 | 2 | 2 | 0  | 0 |
| 39 | 2 | 2 | 21 | 2 |
| 40 | 2 | 2 | 0  | 0 |
| 41 | 2 | 2 | 0  | 0 |
| 42 | 2 | 2 | 0  | 0 |
| 43 | 2 | 2 | 1  | 1 |
| 44 | 2 | 2 | 21 | 2 |
| 45 | 2 | 2 | 0  | 0 |
| 46 | 2 | 2 | 21 | 2 |
| 47 | 2 | 2 | 21 | 2 |
| 48 | 1 | 2 | 32 | 4 |
| 49 | 2 | 2 | 0  | 0 |
| 50 | 2 | 2 | 21 | 2 |
| 51 | 2 | 2 | 21 | 2 |
| 52 | 2 | 1 | 31 | 3 |
| 53 | 2 | 2 | 0  | 0 |
| 54 | 2 | 2 | 0  | 0 |
| 55 | 2 | 1 | 31 | 3 |
| 56 | 2 | 2 | 21 | 2 |
| 57 | 2 | 2 | 0  | 0 |
| 58 | 2 | 2 | 21 | 2 |
| 59 | 2 | 2 | 0  | 0 |
| 60 | 2 | 2 | 21 | 2 |



|    |   |   |    |   |
|----|---|---|----|---|
| 1  |   |   |    |   |
| 2  | 2 | 2 | 0  | 0 |
| 3  | 2 | 2 | 21 | 2 |
| 4  | 2 | 2 | 0  | 0 |
| 5  | 2 | 2 | 0  | 0 |
| 6  | 2 | 2 | 1  | 1 |
| 7  | 2 | 1 | 31 | 3 |
| 8  | 2 | 2 | 0  | 0 |
| 9  | 2 | 2 | 1  | 1 |
| 10 | 2 | 2 | 0  | 0 |
| 11 | 2 | 2 | 21 | 2 |
| 12 | 2 | 1 | 31 | 3 |
| 13 | 2 | 2 | 0  | 0 |
| 14 | 2 | 2 | 21 | 2 |
| 15 | 2 | 2 | 0  | 0 |
| 16 | 2 | 2 | 21 | 2 |
| 17 | 2 | 2 | 0  | 0 |
| 18 | 2 | 2 | 0  | 0 |
| 19 | 2 | 2 | 0  | 0 |
| 20 | 2 | 1 | 31 | 3 |
| 21 | 2 | 2 | 0  | 0 |
| 22 | 2 | 2 | 0  | 0 |
| 23 | 2 | 2 | 1  | 1 |
| 24 | 2 | 2 | 0  | 0 |
| 25 | 2 | 2 | 1  | 1 |
| 26 | 2 | 2 | 1  | 1 |
| 27 | 2 | 1 | 31 | 3 |
| 28 | 2 | 2 | 21 | 2 |
| 29 | 2 | 2 | 0  | 0 |
| 30 | 2 | 2 | 21 | 2 |
| 31 | 2 | 2 | 0  | 0 |
| 32 | 2 | 2 | 0  | 0 |
| 33 | 2 | 1 | 31 | 3 |
| 34 | 2 | 1 | 31 | 3 |
| 35 | 2 | 2 | 0  | 0 |
| 36 | 2 | 2 | 21 | 2 |
| 37 | 2 | 2 | 21 | 2 |
| 38 | 2 | 1 | 31 | 3 |
| 39 | 2 | 1 | 31 | 3 |
| 40 | 2 | 1 | 31 | 3 |
| 41 | 2 | 1 | 31 | 3 |
| 42 | 2 | 2 | 0  | 0 |
| 43 | 2 | 2 | 0  | 0 |
| 44 | 2 | 1 | 31 | 3 |
| 45 | 2 | 2 | 0  | 0 |
| 46 | 2 | 2 | 0  | 0 |
| 47 | 2 | 2 | 21 | 2 |
| 48 | 2 | 2 | 0  | 0 |
| 49 | 2 | 2 | 0  | 0 |
| 50 | 2 | 2 | 0  | 0 |
| 51 | 2 | 1 | 31 | 3 |
| 52 | 2 | 2 | 1  | 1 |
| 53 | 2 | 2 | 0  | 0 |
| 54 | 2 | 2 | 0  | 0 |
| 55 | 2 | 2 | 0  | 0 |
| 56 | 2 | 2 | 0  | 0 |
| 57 | 2 | 2 | 0  | 0 |
| 58 | 2 | 2 | 0  | 0 |
| 59 | 2 | 2 | 0  | 0 |
| 60 | 2 | 2 | 0  | 0 |

1  
2 2 2 0 0  
3  
4  
5  
6  
7  
8  
9  
10  
11  
12  
13  
14  
15  
16  
17  
18  
19  
20  
21  
22  
23  
24  
25  
26  
27  
28  
29  
30  
31  
32  
33  
34  
35  
36  
37  
38  
39  
40  
41  
42  
43  
44  
45  
46  
47  
48  
49  
50  
51  
52  
53  
54  
55  
56  
57  
58  
59  
60

For peer review only

|    |                                      |               |                |               |
|----|--------------------------------------|---------------|----------------|---------------|
| 1  |                                      |               |                |               |
| 2  | <b>SEX</b>                           | 1=men         | 2=women        |               |
| 3  | <b>AREA</b>                          | 1=urban       | 2=rural        |               |
| 4  | <b>Education</b>                     | 1=illiterate  | 2=primary      | 3=secondary   |
| 5  | <b>Occupation</b>                    | 1=service     | 2=business     | 3=housewife   |
| 6  | <b>Marrital status</b>               | 1=married     | 2=others       |               |
| 8  | <b>Insulin use</b>                   | 1=user        | 2=non-user     |               |
| 9  | <b>Current smoking</b>               | 1=smoking     | 2=other form   |               |
| 10 | <b>Current smokeless tobacco use</b> | 1=yes         | 2=non-user     |               |
| 11 | <b>Physical activity</b>             | 1=sufficient  | 2=insufficient |               |
| 12 | <b>Use fitting foot wear</b>         | 1=yes         | 2=non-user     |               |
| 14 | <b>History of trauma</b>             | 1=yes         | 2=no           |               |
| 15 | <b>Regular foot care</b>             | 1=yes         | 2=no           |               |
| 16 | <b>Self foot examination</b>         | 1=yes         | 2=no           |               |
| 17 | <b>Hypertension (HTN)</b>            | 1=yes         | 2=no           |               |
| 18 | <b>Diabetic retinopathy</b>          | 1=yes         | 2=no           |               |
| 19 | <b>Diabetic nephropathy</b>          | 1=yes         | 2=no           |               |
| 20 | <b>Peripheral neuropathy</b>         | 1=yes         | 2=no           |               |
| 21 | <b>Peripheral arterial disease</b>   | 1=yes         | 2=no           |               |
| 22 | <b>Foot deformity</b>                | 1=yes         | 2=no           |               |
| 23 | <b>H/O amputation</b>                | 1=yes         | 2=no           |               |
| 24 | <b>H/O foot ulcer</b>                | 1=yes         | 2=no           |               |
| 27 | <b>IWGDF risk six categories</b>     | 0=group 1 (0) | 1=group 1 (1)  | 21=group 2A   |
| 28 | <b>IWGDF risk five categories</b>    | 0=group 1 (0) | 1=group 1 (1)  | 2=group 2A+2B |
| 29 |                                      |               |                |               |
| 30 |                                      |               |                |               |
| 31 |                                      |               |                |               |
| 32 |                                      |               |                |               |
| 33 |                                      |               |                |               |
| 34 |                                      |               |                |               |
| 35 |                                      |               |                |               |
| 36 |                                      |               |                |               |
| 37 |                                      |               |                |               |
| 38 |                                      |               |                |               |
| 39 |                                      |               |                |               |
| 40 |                                      |               |                |               |
| 41 |                                      |               |                |               |
| 42 |                                      |               |                |               |
| 43 |                                      |               |                |               |
| 44 |                                      |               |                |               |
| 45 |                                      |               |                |               |
| 46 |                                      |               |                |               |
| 47 |                                      |               |                |               |
| 48 |                                      |               |                |               |
| 49 |                                      |               |                |               |
| 50 |                                      |               |                |               |
| 51 |                                      |               |                |               |
| 52 |                                      |               |                |               |
| 53 |                                      |               |                |               |
| 54 |                                      |               |                |               |
| 55 |                                      |               |                |               |
| 56 |                                      |               |                |               |
| 57 |                                      |               |                |               |
| 58 |                                      |               |                |               |
| 59 |                                      |               |                |               |
| 60 |                                      |               |                |               |

1  
2  
3  
4  
5  
6  
7  
8  
9  
10  
11  
12  
13  
14  
15  
16  
17  
18  
19  
20  
21  
22  
23  
24  
25  
26  
27  
28  
29  
30  
31  
32  
33  
34  
35  
36  
37  
38  
39  
40  
41  
42  
43  
44  
45  
46  
47  
48  
49  
50  
51  
52  
53  
54  
55  
56  
57  
58  
59  
60

4=higher education  
4=others

22=group 2B

31=group 3A  
31=group 3A

32=group 3B  
32=group 3B

For peer review only

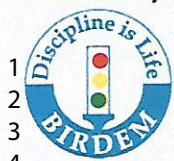

# BIRDEM

An Enterprise of the  
Diabetic Association of  
Bangladesh

## Bangladesh Institute of Research and Rehabilitation in Diabetes, Endocrine and Metabolic Disorders

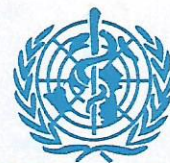

WHO Collaborating Centre  
for Prevention and Control  
of Diabetes

Memo No: BADAS/BIO/EA/11/033

Date: 17.01.2011

To

**Palash Chandra Banik**

**Student, MPhil in Noncommunicable Diseases (NCD)**

**Department of Community Medicine (CM)**

**Bangladesh Institute of Health Sciences (BIHS)**

***Subject: Ethical Clearance***

The Ethical Review Committee (ERC) of the Bangladesh Diabetic Association (BADAS) has the pleasure to accord ethical clearance to your Protocol "**Risk of foot ulcer and its determinants among type 2 diabetic subjects in Bangladesh**" subject to the condition that the guidelines must be followed carefully.

- The Ethical Review Committee approves this study from an ethical point of view upon the addressing by the researchers of the concerns as raised by the ERC affiliates.
- Approval is given for three years. Projects, which have not commenced within two years of original approval, must be re-submitted to ERC. You must inform ERC when the research has been completed.
- Any serious adverse events or significant change which occurs in connection with this study and/or which may alter its ethical considerations must be reported immediately to the ERC.
- Approval is given on the understanding that the 'Guidelines for Ethical Review' are adhered to.

**(Prof. Tofail Ahmed, PhD)**

*Chairman*

*Ethical Review Committee*

# Consent Form

1 **Dear Participant,**  
2

3 **Purposive Selection**

4 You have been purposively selected to be part of this thesis and this is why we would like to interview  
5 you. This thesis is being conducted by **Palash Chandra Banik**, a student of M.Phil in Non-  
6 communicable Diseases at Bangladesh Institute of Health Sciences (BIHS) under Bangabandhu Sheikh  
7 Mujib Medical University (BSMMU). This type of study is currently taking place in several countries  
8 around the world.  
9

10 **Title of Thesis**

11 The title of this thesis is **“Risk of foot ulcer and its determinants among Type 2 diabetic subjects”**.  
12

13 **Aim of the Thesis**

14 To determine diabetic patients at risk for foot ulceration through a multi-center hospital based study in  
15 Bangladesh  
16

17 **Data Collection Methods**

18 **Step 1-** Interview questions

19 **Step 2-** Physical examination & screening test (foot)  
20

21 **Timeframe**

22 It is estimated that step 1 & 2 of this study will take approximately 30-40 minutes.  
23

24 **Confidentiality**

25 The information you provide is totally confidential and will not be disclosed to anyone. It will only be  
26 used for research purposes. Your name, address, and other personal information will be removed from  
27 the instrument, and only a code will be used to connect your name and your answers without  
28 identifying you.  
29

30 **Results**

31 The results of this thesis will be used to help plan strategies in reducing the risk factor that contribute to  
32 diabetic foot ulcer among the diabetic patients as well as chronic non-communicable diseases in  
33 Bangladesh.  
34

35 The results will be published in research publications, media briefings and reports and can be made  
36 available to you by local health workers.  
37

38 **Voluntary Participation**

39 Your participation is voluntary and you can withdraw from the study after having agreed to participate.  
40 You are free to refuse to answer any question that is asked in the questionnaire. If you have any  
41 questions about this study you may ask me or contact to the researcher [Palash Chandra Banik, cell:  
42 +8801710972498].  
43

44 **Consent to Participate**

45 Signing this consent indicates that you understand what will be expected of you and are willing to  
46 participate in this survey.

|                     |  |             |  |
|---------------------|--|-------------|--|
| Read by Participant |  | Interviewer |  |
| Agreed              |  | Refused     |  |

50 **Signatures**

51 I hereby provide INFORMED CONSENT to take part in Steps 1 and 2 of this Risk Factor Study.  
52  
53

54 **Name of the participant:**

**Witness:**

56 **Sign or fingerprint**

**Sign or fingerprint**

# Reporting checklist for cross sectional study.

Based on the STROBE cross sectional guidelines.

## Instructions to authors

Complete this checklist by entering the page numbers from your manuscript where readers will find each of the items listed below.

Your article may not currently address all the items on the checklist. Please modify your text to include the missing information. If you are certain that an item does not apply, please write "n/a" and provide a short explanation.

Upload your completed checklist as an extra file when you submit to a journal.

In your methods section, say that you used the STROBE cross sectional reporting guidelines, and cite them as:

von Elm E, Altman DG, Egger M, Pocock SJ, Gotsche PC, Vandenbroucke JP. The Strengthening the Reporting of Observational Studies in Epidemiology (STROBE) Statement: guidelines for reporting observational studies.

Reporting Item

Page Number

### Title and abstract

|       |                     |                                                                                    |                       |
|-------|---------------------|------------------------------------------------------------------------------------|-----------------------|
| Title | <a href="#">#1a</a> | Indicate the study's design with a commonly used term in the title or the abstract | Page-1, Line Number-1 |
|-------|---------------------|------------------------------------------------------------------------------------|-----------------------|

|    |                      |                     |                                                       |                         |
|----|----------------------|---------------------|-------------------------------------------------------|-------------------------|
| 1  | Abstract             | <a href="#">#1b</a> | Provide in the abstract an informative and            | Page-2,3, Line Number-  |
| 2  |                      |                     |                                                       | 24-52                   |
| 3  |                      |                     |                                                       |                         |
| 4  |                      |                     | balanced summary of what was done and what            |                         |
| 5  |                      |                     |                                                       |                         |
| 6  |                      |                     | was found                                             |                         |
| 7  |                      |                     |                                                       |                         |
| 8  |                      |                     |                                                       |                         |
| 9  | <b>Introduction</b>  |                     |                                                       |                         |
| 10 |                      |                     |                                                       |                         |
| 11 |                      |                     |                                                       |                         |
| 12 | Background /         | <a href="#">#2</a>  | Explain the scientific background and rationale for   | Page-3-5, Line Number-  |
| 13 |                      |                     |                                                       | 63-121                  |
| 14 | rationale            |                     | the investigation being reported                      |                         |
| 15 |                      |                     |                                                       |                         |
| 16 |                      |                     |                                                       |                         |
| 17 | Objectives           | <a href="#">#3</a>  | State specific objectives, including any prespecified | Page-5, Line Number-    |
| 18 |                      |                     |                                                       | 119-121                 |
| 19 |                      |                     | hypotheses                                            |                         |
| 20 |                      |                     |                                                       |                         |
| 21 |                      |                     |                                                       |                         |
| 22 |                      |                     |                                                       |                         |
| 23 | <b>Methods</b>       |                     |                                                       |                         |
| 24 |                      |                     |                                                       |                         |
| 25 |                      |                     |                                                       |                         |
| 26 | Study design         | <a href="#">#4</a>  | Present key elements of study design early in the     | Page-6, Line Number-124 |
| 27 |                      |                     |                                                       |                         |
| 28 |                      |                     | paper                                                 |                         |
| 29 |                      |                     |                                                       |                         |
| 30 |                      |                     |                                                       |                         |
| 31 | Setting              | <a href="#">#5</a>  | Describe the setting, locations, and relevant dates,  | Page-6, Line Number-    |
| 32 |                      |                     |                                                       | 124-127                 |
| 33 |                      |                     | including periods of recruitment, exposure, follow-   |                         |
| 34 |                      |                     |                                                       |                         |
| 35 |                      |                     | up, and data collection                               |                         |
| 36 |                      |                     |                                                       |                         |
| 37 |                      |                     |                                                       |                         |
| 38 |                      |                     |                                                       |                         |
| 39 | Eligibility criteria | <a href="#">#6a</a> | Give the eligibility criteria, and the sources and    | Page-6, Line Number-    |
| 40 |                      |                     |                                                       | 127-132                 |
| 41 |                      |                     | methods of selection of participants.                 |                         |
| 42 |                      |                     |                                                       |                         |
| 43 |                      |                     |                                                       |                         |
| 44 |                      | <a href="#">#7</a>  | Clearly define all outcomes, exposures, predictors,   | Page-6, 7, Line Number- |
| 45 |                      |                     |                                                       | 133-169                 |
| 46 |                      |                     | potential confounders, and effect modifiers. Give     |                         |
| 47 |                      |                     |                                                       |                         |
| 48 |                      |                     | diagnostic criteria, if applicable                    |                         |
| 49 |                      |                     |                                                       |                         |
| 50 |                      |                     |                                                       |                         |
| 51 |                      |                     |                                                       |                         |
| 52 | Data sources /       | <a href="#">#8</a>  | For each variable of interest give sources of data    | Page-7, Line Number-    |
| 53 |                      |                     |                                                       | 151-169                 |
| 54 | measurement          |                     | and details of methods of assessment                  |                         |
| 55 |                      |                     |                                                       |                         |
| 56 |                      |                     | (measurement). Describe comparability of              |                         |
| 57 |                      |                     |                                                       |                         |
| 58 |                      |                     |                                                       |                         |
| 59 |                      |                     |                                                       |                         |
| 60 |                      |                     |                                                       |                         |



assessment methods if there is more than one group. Give information separately for for exposed and unexposed groups if applicable.

|    |                        |                      |                                                                                                                               |                             |
|----|------------------------|----------------------|-------------------------------------------------------------------------------------------------------------------------------|-----------------------------|
| 8  | Bias                   | <a href="#">#9</a>   | Describe any efforts to address potential sources of bias                                                                     | Page-8, Line Number-172-173 |
| 13 | Study size             | <a href="#">#10</a>  | Explain how the study size was arrived at                                                                                     | Page-6, Line Number-134-135 |
| 18 | Quantitative variables | <a href="#">#11</a>  | Explain how quantitative variables were handled in the analyses. If applicable, describe which groupings were chosen, and why | Page-9, Line Number-205-220 |
| 25 | Statistical methods    | <a href="#">#12a</a> | Describe all statistical methods, including those used to control for confounding                                             | Page-9, Line Number-205-220 |
| 31 | Statistical methods    | <a href="#">#12b</a> | Describe any methods used to examine subgroups and interactions                                                               | n/a                         |
| 36 | Statistical methods    | <a href="#">#12c</a> | Explain how missing data were addressed                                                                                       | n/a                         |
| 41 | Statistical methods    | <a href="#">#12d</a> | If applicable, describe analytical methods taking account of sampling strategy                                                | n/a                         |
| 47 | Statistical methods    | <a href="#">#12e</a> | Describe any sensitivity analyses                                                                                             | n/a                         |

## Results

|    |              |                      |                                                                                                |     |
|----|--------------|----------------------|------------------------------------------------------------------------------------------------|-----|
| 55 | Participants | <a href="#">#13a</a> | Report numbers of individuals at each stage of study—eg numbers potentially eligible, examined | n/a |
|----|--------------|----------------------|------------------------------------------------------------------------------------------------|-----|

for eligibility, confirmed eligible, included in the study, completing follow-up, and analysed. Give information separately for for exposed and unexposed groups if applicable.

|                  |                      |                                                                                                                                                                                                                   |                                                                         |
|------------------|----------------------|-------------------------------------------------------------------------------------------------------------------------------------------------------------------------------------------------------------------|-------------------------------------------------------------------------|
| Participants     | <a href="#">#13b</a> | Give reasons for non-participation at each stage                                                                                                                                                                  | Some of the participants were not participate as they had limited time. |
| Participants     | <a href="#">#13c</a> | Consider use of a flow diagram                                                                                                                                                                                    | n/a                                                                     |
| Descriptive data | <a href="#">#14a</a> | Give characteristics of study participants (eg demographic, clinical, social) and information on exposures and potential confounders. Give information separately for exposed and unexposed groups if applicable. | Page-10, Line Number-224-234                                            |
| Descriptive data | <a href="#">#14b</a> | Indicate number of participants with missing data for each variable of interest                                                                                                                                   | n/a                                                                     |
| Outcome data     | <a href="#">#15</a>  | Report numbers of outcome events or summary measures. Give information separately for exposed and unexposed groups if applicable.                                                                                 | n/a                                                                     |
| Main results     | <a href="#">#16a</a> | Give unadjusted estimates and, if applicable, confounder-adjusted estimates and their precision (eg, 95% confidence interval). Make clear which                                                                   | Page-10, Line Number-235-Page-13, Line Number-270.                      |

|    |                   |                                                                           |                |
|----|-------------------|---------------------------------------------------------------------------|----------------|
| 1  |                   | confounders were adjusted for and why they were                           |                |
| 2  |                   |                                                                           |                |
| 3  |                   | included                                                                  |                |
| 4  |                   |                                                                           |                |
| 5  |                   |                                                                           |                |
| 6  | Main results      | <a href="#">#16b</a> Report category boundaries when continuous           | Page-10, Line  |
| 7  |                   |                                                                           |                |
| 8  |                   | variables were categorized                                                | Number-225-234 |
| 9  |                   |                                                                           |                |
| 10 |                   |                                                                           |                |
| 11 | Main results      | <a href="#">#16c</a> If relevant, consider translating estimates of       | n/a            |
| 12 |                   |                                                                           |                |
| 13 |                   | relative risk into absolute risk for a meaningful time                    |                |
| 14 |                   |                                                                           |                |
| 15 |                   | period                                                                    |                |
| 16 |                   |                                                                           |                |
| 17 |                   |                                                                           |                |
| 18 | Other analyses    | <a href="#">#17</a> Report other analyses done—e.g., analyses of          | n/a            |
| 19 |                   |                                                                           |                |
| 20 |                   | subgroups and interactions, and sensitivity                               |                |
| 21 |                   |                                                                           |                |
| 22 |                   | analyses                                                                  |                |
| 23 |                   |                                                                           |                |
| 24 |                   |                                                                           |                |
| 25 |                   |                                                                           |                |
| 26 | <b>Discussion</b> |                                                                           |                |
| 27 |                   |                                                                           |                |
| 28 |                   |                                                                           |                |
| 29 | Key results       | <a href="#">#18</a> Summarise key results with reference to study         | Page-13, Line  |
| 30 |                   |                                                                           |                |
| 31 |                   | objectives                                                                | Number- 272 to |
| 32 |                   |                                                                           |                |
| 33 |                   |                                                                           |                |
| 34 |                   |                                                                           | Page-19, Line  |
| 35 |                   |                                                                           |                |
| 36 |                   |                                                                           | number-405     |
| 37 |                   |                                                                           |                |
| 38 |                   |                                                                           |                |
| 39 | Limitations       | <a href="#">#19</a> Discuss limitations of the study, taking into account | Page-18, Line  |
| 40 |                   |                                                                           |                |
| 41 |                   | sources of potential bias or imprecision. Discuss                         | Number-385-394 |
| 42 |                   |                                                                           |                |
| 43 |                   | both direction and magnitude of any potential bias.                       |                |
| 44 |                   |                                                                           |                |
| 45 |                   |                                                                           |                |
| 46 |                   |                                                                           |                |
| 47 | Interpretation    | <a href="#">#20</a> Give a cautious overall interpretation considering    | Page-18, Line  |
| 48 |                   |                                                                           |                |
| 49 |                   | objectives, limitations, multiplicity of analyses,                        | Number-401 to  |
| 50 |                   |                                                                           |                |
| 51 |                   | results from similar studies, and other relevant                          | Page19, Line   |
| 52 |                   |                                                                           |                |
| 53 |                   | evidence.                                                                 | Number-405     |
| 54 |                   |                                                                           |                |
| 55 |                   |                                                                           |                |
| 56 |                   |                                                                           |                |
| 57 |                   |                                                                           |                |
| 58 |                   |                                                                           |                |
| 59 |                   |                                                                           |                |
| 60 |                   |                                                                           |                |

1 Generalisability [#21](#) Discuss the generalisability (external validity) of the Page-18, Line  
2  
3 study results Number-395-401  
4  
5

## 6 Other

### 7 Information

8  
9  
10  
11  
12 Funding [#22](#) Give the source of funding and the role of the Page-19, Line  
13 funders for the present study and, if applicable, for Number-415-417  
14 the original study on which the present article is  
15 based  
16  
17  
18  
19  
20  
21

22 None The STROBE checklist is distributed under the terms of the Creative Commons Attribution  
23 License CC-BY. This checklist can be completed online using <https://www.goodreports.org/>, a tool  
24 made by the [EQUATOR Network](#) in collaboration with [Penelope.ai](#)  
25  
26  
27  
28  
29  
30  
31  
32  
33  
34  
35  
36  
37  
38  
39  
40  
41  
42  
43  
44  
45  
46  
47  
48  
49  
50  
51  
52  
53  
54  
55  
56  
57  
58  
59  
60

# BMJ Open

## Risk of diabetic foot ulcer and its predictors among Bangladeshi subjects: a multi-centric cross-sectional study

|                                 |                                                                                                                                                                                                                                                                                                                                                                                                                                                                                                                                                                                                                    |
|---------------------------------|--------------------------------------------------------------------------------------------------------------------------------------------------------------------------------------------------------------------------------------------------------------------------------------------------------------------------------------------------------------------------------------------------------------------------------------------------------------------------------------------------------------------------------------------------------------------------------------------------------------------|
| Journal:                        | <i>BMJ Open</i>                                                                                                                                                                                                                                                                                                                                                                                                                                                                                                                                                                                                    |
| Manuscript ID                   | bmjopen-2019-034058.R1                                                                                                                                                                                                                                                                                                                                                                                                                                                                                                                                                                                             |
| Article Type:                   | Original research                                                                                                                                                                                                                                                                                                                                                                                                                                                                                                                                                                                                  |
| Date Submitted by the Author:   | 18-Nov-2019                                                                                                                                                                                                                                                                                                                                                                                                                                                                                                                                                                                                        |
| Complete List of Authors:       | <p>Banik, Palash; Bangladesh Institute of Health Sciences, Community Medicine; Bangladesh University of Health Sciences, Noncommunicable Diseases</p> <p>Barua, Lingkan; Bangladesh University of Health Sciences, Noncommunicable Diseases</p> <p>Moniruzzaman, Mohammad; Bangladesh Institute of Health Sciences, Community Medicine</p> <p>Mondal, Rajib; Bangladesh University of Health Sciences, Noncommunicable Diseases</p> <p>Zaman, Farhana; Bangladesh Institute of Health Sciences, Community Medicine</p> <p>Ali, Liaquat; Bangladesh Institute of Health Sciences, Biochemistry and Cell Biology</p> |
| <b>Primary Subject Heading</b>: | Diabetes and endocrinology                                                                                                                                                                                                                                                                                                                                                                                                                                                                                                                                                                                         |
| Secondary Subject Heading:      | Diabetes and endocrinology, Epidemiology, Public health, Neurology                                                                                                                                                                                                                                                                                                                                                                                                                                                                                                                                                 |
| Keywords:                       | Diabetic foot < DIABETES & ENDOCRINOLOGY, DIABETES & ENDOCRINOLOGY, Bangladesh, diabetic foot ulcer risk, International Working Group on the Diabetic Foot, diabetic foot ulcer                                                                                                                                                                                                                                                                                                                                                                                                                                    |
|                                 |                                                                                                                                                                                                                                                                                                                                                                                                                                                                                                                                                                                                                    |

SCHOLARONE™  
Manuscripts

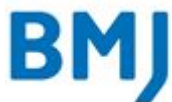

I, the Submitting Author has the right to grant and does grant on behalf of all authors of the Work (as defined in the below author licence), an exclusive licence and/or a non-exclusive licence for contributions from authors who are: i) UK Crown employees; ii) where BMJ has agreed a CC-BY licence shall apply, and/or iii) in accordance with the terms applicable for US Federal Government officers or employees acting as part of their official duties; on a worldwide, perpetual, irrevocable, royalty-free basis to BMJ Publishing Group Ltd ("BMJ") its licensees and where the relevant Journal is co-owned by BMJ to the co-owners of the Journal, to publish the Work in this journal and any other BMJ products and to exploit all rights, as set out in our [licence](#).

The Submitting Author accepts and understands that any supply made under these terms is made by BMJ to the Submitting Author unless you are acting as an employee on behalf of your employer or a postgraduate student of an affiliated institution which is paying any applicable article publishing charge ("APC") for Open Access articles. Where the Submitting Author wishes to make the Work available on an Open Access basis (and intends to pay the relevant APC), the terms of reuse of such Open Access shall be governed by a Creative Commons licence – details of these licences and which [Creative Commons](#) licence will apply to this Work are set out in our licence referred to above.

Other than as permitted in any relevant BMJ Author's Self Archiving Policies, I confirm this Work has not been accepted for publication elsewhere, is not being considered for publication elsewhere and does not duplicate material already published. I confirm all authors consent to publication of this Work and authorise the granting of this licence.

1  
2  
3 1 **Risk of diabetic foot ulcer and its predictors among Bangladeshi subjects: a**  
4 **multi-centric cross-sectional study**  
5  
6

7  
8 3 Palash Chandra Banik<sup>1,2\*</sup>, Lingkan Barua<sup>1</sup>, Mohammad Moniruzzaman<sup>1</sup>, Rajib Mondal<sup>2</sup>,  
9  
10 4 Farhana Zaman<sup>1</sup>, and Liaquat Ali<sup>3</sup>  
11

12 5 <sup>1</sup>Department of Community Medicine, Bangladesh Institute of Health Sciences, 125/1  
13  
14 6 Darus Salam, Mirpur-1, Dhaka-1216, Bangladesh  
15

16  
17 7 <sup>2</sup>Department of Noncommunicable Diseases, Bangladesh University of Health  
18  
19 8 Sciences, 125/1 Darus Salam, Mirpur-1, Dhaka-1216, Bangladesh  
20

21 9 <sup>3</sup>Department of Biochemistry and Cell Biology, Bangladesh University of Health  
22  
23 10 Sciences, 125/1 Darus Salam, Mirpur-1, Dhaka-1216, Bangladesh  
24

25  
26 11 **\* Corresponding author**  
27

28 12 Palash Chandra Banik  
29

30  
31 13 Assistant Professor, Department of Noncommunicable Diseases, Bangladesh  
32  
33 14 University of Health Sciences (BUHS), 125/1 Darus Salam, Mirpur-1, Dhaka-1216,  
34  
35 15 Bangladesh  
36

37 16 Email: [palashcbanik@gmail.com](mailto:palashcbanik@gmail.com)  
38

39  
40 17 Word count (main text): 4467 (excluding title page, abstract, tables,  
41  
42 18 acknowledgements, contributions and references)  
43

44 19 Word count (abstract): 271 (excluding keywords)  
45  
46  
47 20  
48  
49  
50 21  
51  
52 22  
53  
54  
55 23  
56  
57  
58 24  
59  
60

## 25 **Abstract**

### 26 **Objective**

27 To assess the risk of diabetic foot ulcer (DFU) and find out its predictors among type  
28 2 diabetic (T2D) subjects of Bangladesh.

### 29 **Design, setting and participants**

30 This cross-sectional study recruited 1200 T2D subjects who visited sixteen centres of  
31 Health Care Development Project run by Diabetic Association of Bangladesh (DAB).

### 32 **Primary and secondary outcome measures**

33 Risk of DFU was assessed using a modified version of International Working Group  
34 on the Diabetic Foot (IWGDF) Risk Classification System. The modified system was  
35 based on five parameters, namely peripheral neuropathy (PN), peripheral arterial  
36 diseases (PAD), deformity, ulcer history and amputation. The risks were categorised  
37 as Group 0 (no PN, no PAD), Group 1 (PN, no PAD, and no deformity), Group 2A (PN  
38 and deformity, no PAD), Group 2B (PAD), Group 3A (ulcer history) and Group 3B  
39 (amputation). The predictors of DFU risk were determined using multinomial logistic  
40 regression for each risk category separately.

### 41 **Results**

42 Overall, 44.5% of the subjects were found 'at risk' of DFU. This risk was higher among  
43 men (45.6%) than women and among those who lived in rural areas (45.5%) as  
44 compared to the urban population. According to IWGDF categories, the risk was  
45 distributed as 55.5%, 4.2%, 11.6%, 0.3%, 20.6% and 7.9% for group 0, group 1, group  
46 2A, group 2B, group 3A and group 3B respectively. The predictors of DFU (odd ratio  
47 >1) were age  $\geq 50$  years, rural area, low economic status, insulin use, history of trauma,  
48 diabetic retinopathy and diabetic nephropathy.

### 49 **Conclusion**

50 A significant number of the T2D subjects under study were at risk of DFU, which



1  
2  
3  
4 51 demands an effective screening programme to reduce DFU related morbidity and  
5  
6 52 mortality.

7  
8 53 **Keywords:** diabetes; diabetic foot ulcer; diabetic foot ulcer risk; Bangladesh;  
9  
10 54 International Working Group on the Diabetic Foot; predictors; risk factors

## 11 12 55 **Article summary**

### 13 14 15 56 **Strengths and limitations of this study**

- 16  
17  
18 57 • This is the first study in Bangladesh that assesses the risk of DFU using a standard  
19  
20 58 tool
- 21  
22 59 • For the first time, the predictors of DFU were explored to guide the prevention  
23  
24 60 effort
- 25  
26 61 • Sex- and area-specific difference in the risk of DFU will help to identify the  
27  
28 62 disparities and promote decentralisation of diabetes care for all
- 29  
30 63 • Because of the cross-sectional design, we could not establish any causal  
31  
32 64 relationship between the predictors and risk of DFU
- 33  
34 65 • The risk of DFU may be overestimated or underestimated as all centres did not  
35  
36 66 provide the same quality diabetes care

37  
38 67

39  
40  
41 68

42  
43  
44 69

45  
46  
47 70

48  
49  
50 71

51  
52  
53 72

54  
55  
56 73

57  
58  
59 74

60

## 75 **Introduction**

76 In recent years, diabetes mellitus (DM) has become a fast-growing public health  
77 problem that affects both developed and developing countries [1]. The International  
78 Diabetes Federation (IDF) reports that about 415 million people globally had DM in  
79 2015 and it is projected to affect 642 million by 2040. It was deemed possible that by  
80 the year 2040 it might even double the number [2]. Among the clinical classifications  
81 of DM, Type 2 diabetes (T2D) is more common and prevalent in certain ethnic groups,  
82 with estimates up to six times more common in the people of South Asian descent,  
83 three times more common in those of African and African-Caribbean descent and is  
84 more common in people of Chinese descent compared with the white population [3].

85 Like in other developed and developing countries affected by it, it is also highly  
86 prevalent in Bangladesh. Evidence suggests that 9.7% of Bangladeshi adult population  
87 (>35 years) are diabetic and 22.4% are prediabetic [4]. A trend analysis revealed an  
88 increasing prevalence of DM in Bangladesh, from 4% in 1995 to 2000 and 5% in 2001  
89 to 2005 to 9% in 2006 to 2010 respectively [5]. As the prevalence of diabetes increases,  
90 the prevalence of long-term diabetes-related complications is also likely to increase.  
91 Diabetic foot ulcer (DFU) is a common and major complication of diabetes,  
92 representing a major healthcare burden with significant morbidity [6].

93 Diabetic foot is defined as the presence of infection, ulceration and/or destruction of  
94 deep tissues associated with neurologic abnormalities and various degrees of  
95 peripheral arterial disease (PAD) in the lower limb in patients with diabetes [7]. It is a  
96 significant cause of morbidity and can lead to prolonged hospital stays, which is  
97 evidenced by the fact that ~20% of diabetes related hospitalisations are related to DFU  
98 [8]. The mortality rate in patients with DFU is also high and is approximately twice that  
99 of the patients without ulceration [9]. Other than morbidity and mortality, the toll of  
100 economic burden in terms of direct and indirect costs is also high for those having  
101 DFU, estimated approximately €11.6 billion per year for Europe in 2017 and €7.6–11  
102 billion among Medicare beneficiaries of the United States from 2007 to 2014 [7].

1  
2  
3 103 Another issue related to foot ulcers among diabetic patient is the health-related quality  
4  
5 104 of life that cannot be measured in economic terms. It has been reported that patients  
6  
7 105 with foot ulcers or amputation have low health-related quality of life because of  
8  
9 106 substantial depression and other physical problems like inability to do simple tasks or  
10  
11 107 recreational activities [7].  
12

13  
14 108 The major risk factors of DFU are a loss of protective sensation due to diabetic  
15  
16 109 peripheral neuropathy (DPN), peripheral arterial diseases (PAD) and trauma. However,  
17  
18 110 the first two are not independently responsible for DFU; it is the combination  
19  
20 111 neuropathy and PAD with trauma that leads to foot problems. It has been reported  
21  
22 112 that trauma and PAD are major contributors to foot ulceration and diabetic neuropathy  
23  
24 113 is the common denominator in almost 90% of DFU cases. There are some other risk  
25  
26 114 factors namely male gender, previous foot ulceration or amputation, foot deformities,  
27  
28 115 calluses, Charcot arthropathy and high plantar pressures have been associated with an  
29  
30 116 increased risk for foot ulceration. There are some diabetes-related risk factors also that  
31  
32 117 influence the risk of foot ulcers such as the duration of diabetes, poor glycaemic  
33  
34 118 control, diabetic retinopathy or nephropathy, poor compliance with medical  
35  
36 119 instructions and neglectful behaviour. Some societal and behavioural risk factors also  
37  
38 120 show significant association with DFU including low socioeconomic condition, poor  
39  
40 121 access to healthcare services, poor educational status, living alone and smoking [7, 10].  
41  
42 122 Previous studies have reported that the risk of diabetic foot or amputation is  
43  
44 123 significantly lower among the Asians compared to the Europeans in the United  
45  
46 124 Kingdom [11–12]. This reduced risk is probably due to a low prevalence of DPN and  
47  
48 125 PAD among Asians, but the exact reason is not fully understood. However, a previous  
49  
50 126 study has reported prevalence of DPN among Bangladeshi subjects at 19.7% and  
51  
52 127 found it significantly as well as independently associated with age, mode of treatment,  
53  
54 128 income, duration of diabetes and glycaemic status [13].  
55

56 129 The best possible way to prevent DFU is the identification of individuals at risk, proper  
57  
58 130 health education and timely follow-up [14]. It is estimated that the lifetime risk of foot  
59  
60

1  
2  
3 131 ulcers among diabetic population is 19%–34% [7]. To overcome this burden of DFU, it  
4  
5 132 is recommended that clinicians estimate the risk of and the response to associated  
6  
7 133 factors that increase the risk [10]. However, studies related to diabetic foot risk  
8  
9 134 assessment and associated factors among Bangladeshi subjects are absolutely lacking.  
10  
11 135 Hence, we were prompted to assess the risk of foot ulcers and sought to determine  
12  
13 136 the factors that influence the risk among T2D patients of Bangladesh.

## 16 137 **Methods**

### 18 138 **Study design**

21 139 This cross-sectional study was conducted among 1200 T2D subjects who visited  
22  
23 140 several centres of Health Care Development Project (HCDP) run by the Diabetic  
24  
25 141 Association of Bangladesh (DAB). A total of sixteen centres were selected: seven from  
26  
27 142 Dhaka and nine from the northern part of Bangladesh. We purposefully selected the  
28  
29 143 centres and followed convenient sampling technique to collect data from diabetic  
30  
31 144 subjects. Our exclusion criteria included presence of DFU during the interview (active  
32  
33 145 ulcer), acute illness of the subject, unwillingness to participate and mental instability.  
34  
35 146 To meet the eligibility criteria, all subjects were screened for DFU, based on their self-  
36  
37 147 reported statement, their clinical history, foot examination and medical records review.

### 39 148 **Data collection and measurement**

42 149 The data collection comprised of two phases and was conducted from July 2011 to  
43  
44 150 June 2012. In the first phase, a face-to-face interview was conducted using a pre-tested  
45  
46 151 questionnaire adapted from the STEP-wise approach to Surveillance (STEPS) of  
47  
48 152 noncommunicable diseases risk factors of World Health Organization (WHO) [15]. The  
49  
50 153 questionnaire collected sociodemographic and behavioural risk factors (tobacco use,  
51  
52 154 physical inactivity), status of diabetes (duration, medication) and its complications  
53  
54 155 (retinopathy, nephropathy) and foot problem-related information (neuropathy, PAD,  
55  
56 156 trauma, foot hygiene) of the participants. The blood glucose levels (fasting/2-hours  
57  
58 157 post meal) and information about diabetic nephropathy or retinopathy in the  
59  
60 158 participants was extracted from their diabetes records book. The last record within one

1  
2  
3 159 month was used to assess their glycaemic status. In the second phase, physical  
4  
5 160 measurements (anthropometric and blood pressure) and foot examination were  
6  
7 161 carried out by trained physicians. The anthropometric and blood pressure  
8  
9 162 measurement followed the methods described in 'Noncommunicable disease risk  
10  
11 163 factors survey Bangladesh 2010' [16]. The anthropometric measurements included  
12  
13 164 height, weight, waist circumference, hip circumference and derivatives like body mass  
14  
15 165 index (BMI) and waist-hip ratio.

### 166 **Assessment of DFU**

167 The risk of DFU was assessed using a modified version of International Working Group  
168 on the Diabetic Foot (IWGDF) Risk Classification System proposed by Lavery *et al.* [17].  
169 We screened each patient to identify lower extremity complications and presence of  
170 any risk factors, like ulcerations, amputation, peripheral neuropathy (PN), PAD, foot  
171 deformities and limited joint mobility using the methods followed by Lavery *et al.* [17–  
172 18]. We used a 10 g Semmes-Weinstein monofilament and vibration perception  
173 threshold tester to assess PN, Ankle Brachial Index (ABI) to detect PAD, goniometer to  
174 identify foot deformity and clinical examinations to evaluate joint mobility. The risks  
175 were categorised according to the modified IWGDF risk classification system: Group 0  
176 (no PN, no PAD), Group 1 (PN, no PAD, no deformity), Group 2A (PN and deformity,  
177 no PAD), Group 2B (PAD), Group 3A (ulcer history) and Group 3B (amputation). Here,  
178 Group 0 indicated 'no risk' and rest of the groups (1, 2A, 2B, 3A, 3B) classified the study  
179 population 'at risk' of in varying degrees

### 180 **Ascertainment of key variables**

#### 181 *Peripheral neuropathy*

182 PN was defined as lack of feeling/protective sensation (at four or more of 10 sites) [19]  
183 and vibration perception threshold value in either foot >25 volts using an  
184 electromechanical instrument [18].

#### 185 *Peripheral arterial disease*

186 We defined PAD as non-palpable dorsalis pedis or posterior tibial arterial pulse and  
187 ABI in either foot as  $<0.80$  [17].

### 188 *Limited joint mobility*

189 Limited joint mobility was defined based on three averaged measurements of the first  
190 metatarsophalangeal joint, the subtalar joint and ankle joint range of motion of the  
191 forefoot, rear foot and ankle. From these measurements, we determined the presence  
192 of ankle joint equinus ( $<0^\circ$  dorsiflexion), limited subtalar joint motion ( $<20^\circ$  total joint  
193 motion), and hallux rigidus ( $<50^\circ$  hallux dorsiflexion) [18]. It was measured using  
194 goniometer and details technique was described elsewhere (see online supplementary  
195 file 1)

### 196 *Foot deformity*

197 Deformity was defined as any contracture that could not be fully corrected manually,  
198 such as hallux valgus, hammer toes or claw toes, hallux rigidus and ankle equines [17].  
199 It was measured using goniometer and details technique was described elsewhere (see  
200 online supplementary file 1).

### 201 *Foot ulcer*

202 Foot ulcers were defined as full thickness wounds involving the foot or the ankle [20].

## 203 **Quality assurance**

204 To ensure standard quality control, a panel of senior researchers and survey  
205 investigators visited the data collection sites to monitor the research activities. To  
206 prevent bias, monitoring panel was anonymised for the data collectors. All team  
207 members including investigators, supervisor and data collectors participated in  
208 intensive three consecutive training programmes (lasting two and a half days) in Dhaka  
209 before the survey. The first training program was conducted for the physicians who  
210 were involved in foot examination. This training program focused on 'Detection of  
211 Diabetic Foot Problem at the Early Stage' through screening using a standard  
212 instrument. A certified neurologist from a reputed post-graduate training institution

1  
2  
3 213 was appointed as a resource person to conduct the sessions. Second and third training  
4  
5 214 programmes were conducted for the volunteering data collectors selected from  
6  
7 215 undergraduate physiotherapy students, who interviewed the respondents to fill-up the  
8  
9 216 questionnaire. The purpose of this training was to inform the data collectors about  
10  
11 217 potential difficulties associated with data collection. During this intensive training, data  
12  
13 218 collectors got practical training about self-administration of a questionnaire, physical  
14  
15 219 measurement and maintenances of data collection environment. Other than these, we  
16  
17 220 also followed specific protocols to assure quality of the study that included: (1) pre-  
18  
19 221 testing of the questionnaire and data collection procedure (2) standard method of  
20  
21 222 measurement as per STEPS survey 2010 of Bangladesh (3) used show cards for a better  
22  
23 223 understanding of different forms of tobacco use and intensity of physical activities (4)  
24  
25 224 adequate privacy during physical measurements and clinical examinations (5) robust  
26  
27 225 equipment for physical measurement and clinical examination. None of the quality  
28  
29 226 control observer reported any violation of physical measurement and data collection.

### 31 227 **Patient and public involvement**

32  
33  
34 228 We collected data from the patients who visited the selected diabetes care centres of  
35  
36 229 DAB. However, they were not involved directly in the setting of the research question  
37  
38 230 or outcome measures. They did not have any role in designing or implementing this  
39  
40 231 work or interpretation of the results.

### 41 232 **Ethical consideration**

42  
43  
44  
45 233 The purpose of the study, rights of the respondents and data safety issues were  
46  
47 234 explained to each participant. All subjects gave their informed written consent for  
48  
49 235 inclusion before they participated in the study (see online supplementary file 2). The  
50  
51 236 study was conducted in accordance with the Declaration of Helsinki, and the protocol  
52  
53 237 was approved by the Ethical Review Committee of Bangladesh Diabetic Association  
54  
55 238 (Identification number: BADAS/BIO/EA/11/033) on January 17, 2011 (see online  
56  
57 239 supplementary file 3).

### 58 59 60 240 **Data processing and analysis**

1  
2  
3 241 Data were analysed using the Statistical Package for Social Science (SPSS) version 20.0  
4  
5 242 for Windows (SPSS, Inc. Chicago. IL. USA). All estimates of precision were presented at  
6  
7 243 95% confidence interval (CI) in the tables. Descriptive analysis included mean, standard  
8  
9 244 deviation (SD), median and interquartile range (IQR), frequencies and percentages  
10  
11 245 where appropriate. In this study, the  $p$ -value (two-sided) was considered statistically  
12  
13 246 significant at the threshold of  $p < 0.05$ . In our study, there were only three respondents  
14  
15 247 with PAD. Hence, we had to merge group 2B with group 2A and make a new group 2-  
16  
17 248 A/B that was used in multinomial logistic regression analysis.

19  
20 249 To find the predictors of DFU, first we run chi-square test considering modified IWGDF  
21  
22 250 risk classification as a dependent variable. Variables that showed significant association  
23  
24 251 ( $p < 0.05$ ) with the dependent variable in the chi-square test were identified. Then  
25  
26 252 statistically significant variables were examined as independent variable against the  
27  
28 253 dependent variable in the multinomial logistic regression analysis. For multinomial  
29  
30 254 logistic regression analysis, we calculated odds ratios (OR), and 95% CI for each  
31  
32 255 independent variable. In the regression table, predictors that had OR  $> 1$  were  
33  
34 256 presented for each risk category. We ensured presence of no multicollinearity using  
35  
36 257 variance inflation factor (VIF) to run the regression analysis. We used the STROBE  
37  
38 258 (Strengthening the Reporting of Observational Studies in Epidemiology) guidelines for  
39  
40 259 reporting the results of cross-sectional observational study (see online supplementary  
41  
42 260 file 4).

## 261 **Results**

### 262 **Sociodemographic characteristics and diabetes-related information**

263 The mean age of the participants was  $51.6 \pm 11.9$  years and most of them (33.1%) were  
264 in the 50–59 year age group. More than half of the participants were women (62.9%)  
265 and predominantly urban residents (67.3%). Most of them had completed primary level  
266 education (36.7%), 99% were married, 57.8% were housewives and 44.5% came from  
267 middle-income background. However, urban participants were more literate (88.2%)  
268 and economically stable (60.3%  $>$  lower-middle-income range) than their rural



269 counterparts. The mean duration of diabetes was  $6.9 \pm 5.9$  years and a majority of them  
 270 had uncontrolled glycaemic status (89.3%). Among the diabetes-related complications,  
 271 retinopathy (14.3%) was much higher than nephropathy (5.6%). No mentionable  
 272 urban-rural difference was observed for the glycaemic status and diabetic  
 273 nephropathy (Table 1).

274 **Table 1: Sociodemographic and diabetes-related information of the study**  
 275 **subjects,  $n=1200$**

| Variables                     | Urban           |           | Rural           |           | Total           |           |
|-------------------------------|-----------------|-----------|-----------------|-----------|-----------------|-----------|
|                               | <i>n</i> (%)    | 95% CI    | <i>n</i> (%)    | 95% CI    | <i>n</i> (%)    | 95% CI    |
| <b>Age (years)*</b>           | 52.3 $\pm$ 11.9 |           | 50.2 $\pm$ 11.8 |           | 51.6 $\pm$ 11.9 |           |
| <b>Age categories (years)</b> |                 |           |                 |           |                 |           |
| <30                           | 52 (4)          | 2.6–5.4   | 22 (5.6)        | 3.3–7.9   | 54 (4.5)        | 3.3–5.7   |
| 30–39                         | 63 (7.8)        | 5.9–9.7   | 39 (9.9)        | 14.6–18   | 102 (8.5)       | 6.9–10.1  |
| 40–49                         | 212<br>(26.3)   | 23.3–29.3 | 109<br>(27.7)   | 23.3–32.1 | 321<br>(26.8)   | 24.3–29.3 |
| 50–59                         | 270<br>(33.5)   | 30.2–36.8 | 127<br>(32.3)   | 27.7–36.9 | 397<br>(33.1)   | 30.4–35.8 |
| $\geq 60$                     | 230<br>(28.5)   | 25.4–31.6 | 96 (24.4)       | 20.2–28.6 | 326<br>(27.2)   | 24.7–29.7 |
| <b>Sex</b>                    |                 |           |                 |           |                 |           |
| Men                           | 302<br>(37.4)   | 34.1–40.7 | 143<br>(36.4)   | 31.6–41.2 | 445<br>(37.1)   | 34.4–39.8 |
| Women                         | 505<br>(62.6)   | 59.3–65.9 | 250<br>(63.6)   | 58.8–68.4 | 755<br>(62.9)   | 60.2–65.6 |
| <b>Educational status</b>     |                 |           |                 |           |                 |           |
| Illiterate                    | 95 (11.8)       | 9.6–14    | 107<br>(27.2)   | 22.8–31.6 | 202<br>(16.8)   | 14.7–18.9 |
| Primary                       | 288<br>(35.7)   | 32.4–39   | 152<br>(38.7)   | 33.9–43.5 | 440<br>(36.7)   | 34–39.4   |
| Secondary                     | 265<br>(32.8)   | 29.6–36   | 98 (24.9)       | 20.6–29.2 | 363<br>(30.3)   | 27.7–32.9 |
| Higher education              | 159             | 17–22.4   | 36 (9.2)        | 6.3–12.1  | 195             | 14.2–18.4 |

|    |                                        |                                                                                              |           |                    |            |                     |           |
|----|----------------------------------------|----------------------------------------------------------------------------------------------|-----------|--------------------|------------|---------------------|-----------|
| 1  |                                        |                                                                                              |           |                    |            |                     |           |
| 2  |                                        |                                                                                              |           |                    |            |                     |           |
| 3  |                                        | (19.7)                                                                                       | —         |                    | —          | (16.3)              |           |
| 4  |                                        |                                                                                              |           |                    |            |                     |           |
| 5  | <b>Marital status</b>                  |                                                                                              |           |                    |            |                     |           |
| 6  |                                        |                                                                                              |           |                    |            |                     |           |
| 7  | Married                                | 797<br>(98.8)                                                                                | 98–99.6   | 391<br>(99.5)      | 98.8–100.2 | 1188<br>(99)        | 98.4–99.6 |
| 8  |                                        |                                                                                              |           |                    |            |                     |           |
| 9  | Others                                 | 10 (1.2)                                                                                     | 0.4–2     | 2 (0.5)            | -0.2–1.2   | 12 (1)              | 0.4–1.6   |
| 10 |                                        |                                                                                              |           |                    |            |                     |           |
| 11 | <b>Occupational status</b>             |                                                                                              |           |                    |            |                     |           |
| 12 |                                        |                                                                                              |           |                    |            |                     |           |
| 13 | Service                                | 184<br>(22.8)                                                                                | 19.9–25.7 | 49 (12.5)          | 9.2–15.8   | 233<br>(19.4)       | 17.2–21.6 |
| 14 |                                        |                                                                                              |           |                    |            |                     |           |
| 15 | Business                               | 89 (11)                                                                                      | 8.8–13.2  | 38 (9.7)           | 6.8–12.6   | 127<br>(10.6)       | 8.9–12.3  |
| 16 |                                        |                                                                                              |           |                    |            |                     |           |
| 17 | Housewife                              | 462<br>(57.2)                                                                                | 53.8–60.6 | 231<br>(58.8)      | 53.9–63.7  | 693<br>(57.8)       | 55–60.6   |
| 18 |                                        |                                                                                              |           |                    |            |                     |           |
| 19 | Others                                 | 72 (8.9)                                                                                     | 6.9–10.9  | 75 (15.2)          | 11.7–18.7  | 147<br>(12.3)       | 10.4–14.2 |
| 20 |                                        |                                                                                              |           |                    |            |                     |           |
| 21 | <b>Monthly household income (BDT)†</b> | 20000 (10000–40000)                                                                          |           | 10000 (6000–20000) |            | 20000 (10000–30000) |           |
| 22 |                                        |                                                                                              |           |                    |            |                     |           |
| 23 | <b>Monthly household income groups</b> |                                                                                              |           |                    |            |                     |           |
| 24 |                                        |                                                                                              |           |                    |            |                     |           |
| 25 | <4907 (low)                            | 21 (2.6)                                                                                     | 1.5–3.7   | 41 (10.4)          | 7.4–13.4   | 62 (5.2)            | 3.9–6.5   |
| 26 |                                        |                                                                                              |           |                    |            |                     |           |
| 27 | 4907–19,488 (lower-middle)             | 299<br>(37.1)                                                                                | 33.8–40.4 | 238<br>(60.6)      | 55.8–65.4  | 537<br>(44.8)       | 42–47.6   |
| 28 |                                        |                                                                                              |           |                    |            |                     |           |
| 29 | 19489–60252 (upper-middle)             | 422<br>(52.3)                                                                                | 48.9–55.7 | 108<br>(27.5)      | 23.1–31.9  | 530<br>(44.2)       | 41.4–47   |
| 30 |                                        |                                                                                              |           |                    |            |                     |           |
| 31 | >60,252 (high)                         | 65 (8.1)                                                                                     | 6.2–10    | 6 (1.5)            | 0.3–2.7    | 71 (5.9)            | 4.6–7.2   |
| 32 |                                        |                                                                                              |           |                    |            |                     |           |
| 33 | <b>Duration of diabetes (years)*</b>   | 7.3 ±6                                                                                       |           | 6.3 ±5.8           |            | 6.9 ±5.9            |           |
| 34 |                                        |                                                                                              |           |                    |            |                     |           |
| 35 | <b>Glycaemic status‡</b>               |                                                                                              |           |                    |            |                     |           |
| 36 |                                        |                                                                                              |           |                    |            |                     |           |
| 37 | Controlled                             | 87 (10.8)                                                                                    | 8.7–12.9  | 42 (10.7)          | 7.6–13.8   | 129<br>(10.8)       | 9–12.6    |
| 38 |                                        |                                                                                              |           |                    |            |                     |           |
| 39 | Uncontrolled                           | 720<br>(89.2)                                                                                | 87.1–91.3 | 351<br>(89.3)      | 86.2–92.4  | 1071<br>(89.3)      | 87.6–91   |
| 40 |                                        |                                                                                              |           |                    |            |                     |           |
| 41 | <b>Diabetic retinopathy</b>            | 134<br>(16.6)                                                                                | 14–19.2   | 38 (9.7)           | 6.8–12.6   | 172<br>(14.3)       | 12.3–16.3 |
| 42 |                                        |                                                                                              |           |                    |            |                     |           |
| 43 | <b>Diabetic nephropathy</b>            | 46 (5.7)                                                                                     | 4.1–7.3   | 21 (5.3)           | 3.1–7.5    | 67 (5.6)            | 4.3–6.9   |
| 44 |                                        |                                                                                              |           |                    |            |                     |           |
| 45 |                                        |                                                                                              |           |                    |            |                     |           |
| 46 |                                        |                                                                                              |           |                    |            |                     |           |
| 47 |                                        |                                                                                              |           |                    |            |                     |           |
| 48 |                                        |                                                                                              |           |                    |            |                     |           |
| 49 |                                        |                                                                                              |           |                    |            |                     |           |
| 50 |                                        |                                                                                              |           |                    |            |                     |           |
| 51 |                                        |                                                                                              |           |                    |            |                     |           |
| 52 |                                        |                                                                                              |           |                    |            |                     |           |
| 53 |                                        |                                                                                              |           |                    |            |                     |           |
| 54 |                                        |                                                                                              |           |                    |            |                     |           |
| 55 |                                        |                                                                                              |           |                    |            |                     |           |
| 56 | 276                                    | *Representing mean and standard deviation,                                                   |           |                    |            |                     |           |
| 57 |                                        |                                                                                              |           |                    |            |                     |           |
| 58 | 277                                    | †Presented as median with interquartile range,                                               |           |                    |            |                     |           |
| 59 |                                        |                                                                                              |           |                    |            |                     |           |
| 60 | 278                                    | ‡According to the 2006 per-capita gross national income (GNI) and the World Bank calculation |           |                    |            |                     |           |

279 §Based on plasma glucose level pre-meal (fasting) <6.1 mmol/l and/or two hours post meal <7.8  
280 mmol/l

### 281 **Risk of DFU among the study population**

282 Table 2 shows the sex and area-specific distribution of the DFU risk according to the  
283 modified version of IWGDF classification. Overall, 44.5% of the study population was  
284 diagnosed as 'at risk' of DFU and the burden was higher among men (45.6%) and those  
285 who lived in rural areas (45.5%). The risk of DFU according to the modified version of  
286 IWGDF was 55.5%, 4.2%, 11.6%, 0.3%, 20.6% and 7.9% for group 0, group 1, group 2A,  
287 group 2B, group 3A and group 3B respectively. Among the six groups of risk  
288 classification, group 3A (ulcer history) showed maximum risk (20.6%) compared to  
289 other groups. For sex and area variables, 21.8% of men and one-fourth of the rural  
290 residents (25.7%) had a previous history of foot ulceration.

291 **Table 2: Sex and area-specific distribution of DFU risk among the study subjects, n = 1200**

| IWGDF DFU risk classification       | Sex        |            | Area of residence |            | Overall<br>n (%) |
|-------------------------------------|------------|------------|-------------------|------------|------------------|
|                                     | Men        | Women      | Urban             | Rural      |                  |
|                                     | n (%)      | n (%)      | n (%)             | n (%)      |                  |
| Group 0 (no PN, no PAD)             | 242 (54.4) | 430 (57)   | 452 (56)          | 214 (54.5) | 666 (55.5)       |
| Group 1 (PN, no PAD, no deformity)  | 18 (4)     | 32 (4.2)   | 32 (4)            | 18 (4.6)   | 50 (4.2)         |
| Group 2A (PN and deformity, no PAD) | 49 (11)    | 90 (11.9)  | 103<br>(12.8)     | 36 (9.2)   | 139 (11.6)       |
| Group 2B (PAD)                      | 1(0.2)     | 2 (0.3)    | 3 (0.4)           | 0          | 3 (0.3)          |
| Group 3A (ulcer history)            | 97 (21.8)  | 150 (19.9) | 146<br>(18.1)     | 101 (25.7) | 247 (20.6)       |
| Group 3B (amputation)               | 38 (8.5)   | 57 (7.5)   | 71 (8.8)          | 24 (6.1)   | 95 (7.9)         |

292 IWGDF, International Working Group on the Diabetic Foot; DFU, diabetic foot ulcer, PN, peripheral  
293 neuropathy; PAD, peripheral arterial disease

### 294 **Predictors of DFU risk among the study subjects**

295 Table 3 shows the predictors of DFU risk among the study population. Total six  
296 predictors were identified which showed high odds (>1) for different groups at risk:

297 age (group 2-A/B, OR 1.212; group 3B, OR 1.173), area of residence (group 1, OR 1.188;  
 298 group 3A, OR 1.461), monthly income (group 2-A/B, OR 1.491; group 3A, OR 1.415;  
 299 group 3B, OR 1.768), medication (group 2-A/B, OR 1.014), history of trauma (group 1,  
 300 OR 2.015; group 2-A/B, OR 1.032; group 3A, OR 2.998; group 3B, OR 3.104), diabetic  
 301 retinopathy (group 1, OR 1.104; group 3B, OR, 1.933) and diabetic nephropathy (group  
 302 1, OR 2.174; group 3A, OR 1.260; group 3B, OR 2.389).

303 Overall, the odds for risk of DFU was higher among those who were  $\geq 50$  years old,  
 304 lived in rural areas, had a monthly income  $\leq 19,488$  BDT, had a previous history of foot  
 305 ulcer, were insulin user and had diabetic complications as retinopathy or nephropathy.

306 **Table 3: Predictors of diabetic foot ulcer among type 2 diabetic subjects of Bangladesh using**  
 307 **multinomial logistic regression,  $n = 1200$**

| Risk groups | Predictors           | B     | p-value | OR          | 95% CI for OR |             |
|-------------|----------------------|-------|---------|-------------|---------------|-------------|
|             |                      |       |         |             | Lower Bound   | Upper Bound |
| Group 1     | Area of residence    |       |         |             |               |             |
|             | Rural area           | 0.172 | 0.573   | 1.188       | 0.652         | 2.165       |
|             | Urban area           |       |         | <i>Ref.</i> |               |             |
|             | History of trauma    |       |         |             |               |             |
|             | Present              | 0.7   | 0.076   | 2.015       | 0.929         | 4.369       |
|             | Absent               |       |         | <i>Ref.</i> |               |             |
|             | Diabetic retinopathy |       |         |             |               |             |
|             | Present              | 0.099 | 0.814   | 1.104       | 0.486         | 2.508       |
|             | Absent               |       |         | <i>Ref.</i> |               |             |
|             | Diabetic nephropathy |       |         |             |               |             |
|             | Present              | 0.526 | 0.14    | 2.174       | 755           | 6.099       |
|             | Absent               |       |         | <i>Ref.</i> |               |             |

Group 2-A/B† Age

|          |                      |       |         |       |             |       |
|----------|----------------------|-------|---------|-------|-------------|-------|
|          | ≥50 years            | 0.192 | 0.324   | 1.212 | 0.827       | 1.774 |
|          | <50 years            |       |         |       | <i>Ref.</i> |       |
|          | Monthly income (BDT) |       |         |       |             |       |
|          | ≤19,488              | 0.4   | 0.039*  | 1.491 | 1.020       | 2.181 |
|          | >19,488              |       |         |       | <i>Ref.</i> |       |
|          | Medication           |       |         |       |             |       |
|          | Insulin user         | 0.013 | 0.945   | 1.014 | 0.692       | 1.485 |
|          | Insulin non-user     |       |         |       | <i>Ref.</i> |       |
|          | History of trauma    |       |         |       |             |       |
|          | Present              | 0.032 | 0.916   | 1.032 | 0.570       | 1.870 |
|          | Absent               |       |         |       | <i>Ref.</i> |       |
| <hr/>    |                      |       |         |       |             |       |
|          | Area of residence    |       |         |       |             |       |
|          | Rural area           | 0.379 | 0.014*  | 1.461 | 1.081       | 1.975 |
|          | Urban area           |       |         |       | <i>Ref.</i> |       |
|          | Monthly income (BDT) |       |         |       |             |       |
|          | ≤19,488              | 0.347 | 0.031*  | 1.415 | 1.032       | 1.940 |
|          | >19,488              |       |         |       | <i>Ref.</i> |       |
| Group 3A | History of trauma    |       |         |       |             |       |
|          | Present              | 1.098 | <0.001* | 2.998 | 2.044       | 4.396 |
|          | Absent               |       |         |       | <i>Ref.</i> |       |
|          | Diabetic Nephropathy |       |         |       |             |       |
|          | Present              | 0.231 | 0.504   | 1.260 | 0.640       | 2.482 |
|          | Absent               |       |         |       | <i>Ref.</i> |       |
| <hr/>    |                      |       |         |       |             |       |
|          | Age                  |       |         |       |             |       |
| Group 3B | ≥50 years            | 0.160 | 0.494   | 1.173 | 0.742       | 1.854 |
|          | <50 years            |       |         |       | <i>Ref.</i> |       |

|                      |       |         |       |             |       |  |
|----------------------|-------|---------|-------|-------------|-------|--|
| Monthly income (BDT) |       |         |       |             |       |  |
| ≤19,488              | 0.570 | 0.016*  | 1.768 | 1.114       | 2.805 |  |
| >19,488              |       |         |       | <i>Ref.</i> |       |  |
| History of trauma    |       |         |       |             |       |  |
| Present              | 1.133 | <0.001* | 3.104 | 1.810       | 5.324 |  |
| Absent               |       |         |       | <i>Ref.</i> |       |  |
| Diabetic retinopathy |       |         |       |             |       |  |
| Present              | 0.659 | 0.018*  | 1.933 | 1.122       | 3.329 |  |
| Absent               |       |         |       | <i>Ref.</i> |       |  |
| Diabetic nephropathy |       |         |       |             |       |  |
| Present              | 0.871 | 0.024*  | 2.389 | 1.123       | 5.083 |  |
| Absent               |       |         |       | <i>Ref.</i> |       |  |

308 OR, odd-ratio; CI, confidence interval; Ref, reference; BDT, Bangladesh taka

309 \*indicates significant

310 †Group 2B was merged with 2A as the participants were very few in the group 2B

## 311 Discussion

312 The results show that nearly half (45%) of the T2D subjects were at the risk of DFU and  
 313 rural population was mostly affected. This is significant as there is no straightforward  
 314 evidence on the risk of DFU among T2D population of Bangladesh. Moreover, the  
 315 contributing factors are not yet explored in Bangladesh to take an effective initiative  
 316 to reduce the burden of associated morbidity and mortality.

317 In our modified DFU risk classification as per IWGDF, the higher burden was observed  
 318 in those who had a previous history of foot ulcer (20.6%). This proportion is much  
 319 higher than an Iranian study that reported only 7% of the study subjects to have a  
 320 previous history of foot ulceration [21]. The percentage of our finding is also higher  
 321 than Portugal, where a study reported a previous history of DFU among 16% of study  
 322 subjects using modified IWGDF risk classification [22]. Although it has been estimated  
 323 that the annual risk of DFU is approximately 2%, this risk in patients with a previous

1  
2  
3 324 history of foot ulcer is expected to increase to 17%–60% over the next three years [23].  
4

5  
6 325 Several studies have reported the cumulative burden of a previous history of foot ulcer  
7  
8 326 and amputation as a part of their diabetic foot risk assessment. In our study, the  
9  
10 327 cumulative proportion of a previous history of foot ulcer and amputation was 14.3%,  
11  
12 328 which is twice that of studies conducted in India [24,25] and in a half of Portugal [22].  
13  
14 329 A follow-up study from the USA reported nearly three times higher proportion of foot  
15  
16 330 ulcer or amputation compared to our study [26]. In this regard, a systematic review  
17  
18 331 comprised of 41 documents by Hunt et al. [27] found that a person with a previous  
19  
20 332 history of DFU has a 66% chance of ulcer recurrence and 12% chance of amputation  
21  
22 333 over five years.

23  
24 334 We have mentioned earlier that PN is one of the major risk factors for DFU. In our  
25  
26 335 study, 4.2% of the T2D subjects had only PN and 11.6% had PN with deformity,  
27  
28 336 represented as group 1 and group 2A respectively. This finding has much lower  
29  
30 337 percentages compared to similar studies conducted among subjects of India [24,28–  
31  
32 338 29] and Iran [21,29]. However, this burden is still higher than Portugal [22]. Our study  
33  
34 339 classified very low proportion of T2D subjects as having PAD compared to  
35  
36 340 aforementioned studies [21–24,28–30]. This might be due to the cut-off value applied  
37  
38 341 to define PAD. The compared studies used ABI 0.9 or less as the cut-off, which included  
39  
40 342 more participants as PAD. The overall burden of 'at risk' (other than group 0) T2D  
41  
42 343 subjects of this study was also lower than the findings from India [28–29] and Portugal  
43  
44 344 [22]. However, the proportion of 'at risk' subjects is more than twice that of  
45  
46 345 aforementioned Indian [24] and Iranian [21] studies. The reasons for the risk difference  
47  
48 346 in different countries are still unclear.

49  
50  
51 347 A study by Abott et al. explored this risk difference among different ethnic population  
52  
53 348 including South-Asians, African-Caribbeans and Europeans of the United Kingdom  
54  
55 349 [11]. They reported that such difference might be due to the methods applied to detect  
56  
57 350 neuropathy, provisions of primary health care services, such as diabetes mini-clinics,  
58  
59 351 podiatric care and referrals for special footwear for the health care districts and a  
60

1  
2  
3 352 variable quality of health care. Regarding the burden of risk factors of DFU, Abott et  
4  
5 353 al. added that lower level of PN and PAD also contribute to the less percentage of  
6  
7 354 South-Asian population 'at risk' compared to Europeans. Another reason behind this  
8  
9 355 difference is the application of various risk classification system in different countries.  
10  
11 356 We used modified IWGDF risk classification, similar to the studies from Iran [21] and  
12  
13 357 Portugal [22], whereas one of the two Indian [24] studies used semi-structured pre-  
14  
15 358 tested questionnaire and another [28] applied American Diabetic Association (ADA)  
16  
17 359 task force report for comprehensive foot examination risk classification.

18  
19  
20 360 Our study reports a sex-specific and area-specific difference in risk of DFU among T2D  
21  
22 361 population of Bangladesh. The overall proportion of DFU risk was higher among men  
23  
24 362 than women. Previous studies [7,21,24,31] have also reported similar findings.  
25  
26 363 However, a community-based study from India reported that DFU risk was high in  
27  
28 364 women [25], which is contradictory to our finding.

29  
30 365 Our study shows that the risk of DFU is greater among men with a previous history of  
31  
32 366 ulcer or amputation. This higher risk of foot ulcer history or amputation in men was  
33  
34 367 also supported by a study from Iran, which used IWGDF risk classification system [21].  
35  
36 368 This men-to-women risk difference might be due to diabetes-related healthy  
37  
38 369 behavioural practice, health-seeking behaviour and self-care. In this regard, a Brazilian  
39  
40 370 study reported that sex is significantly associated with changes of lifestyle behaviour  
41  
42 371 related to control of T2D, foot self-care and prevention of ulceration, and women were  
43  
44 372 found to adhere more to lifestyle changes than men [32]. The same study also reported  
45  
46 373 that men were highly reluctant to check their glycaemic status and lipid profile  
47  
48 374 compared to women [32]. In this case, the fact is that women are more sensitive to  
49  
50 375 health issues and more frequently seek health services than men do [33,34].

51  
52  
53 376 For the urban–rural difference, we found that the risk was higher among those who  
54  
55 377 lived in a rural area. This finding is also supported by other studies [24,29,35]. A  
56  
57 378 possible explanation is that diabetic patients of rural area are not aware of their PN  
58  
59 379 due to illiteracy, especially their lack of knowledge about diabetic foot-related  
60



1  
2  
3 380 complications. They walk barefoot and this leads to an injury to the foot and  
4  
5 381 subsequent complications [36]. Another explanation could be that people in rural areas  
6  
7 382 often sleep in huts or farmhouses where rodents are common; rodents bite their feet  
8  
9 383 and in case of patients with diabetes, this can lead to chronic ulcers [35].  
10

11  
12 384 One of the major objectives of this study was to identify the predictors of DFU risk  
13  
14 385 among Bangladeshi T2D population. Sociodemographic predictors age  $\geq 50$  years,  
15  
16 386 living in a rural area and monthly income  $\leq 19,488$  BDT predicted higher odds for the  
17  
18 387 risk of DFU. In diabetic research, age is widely evaluated as a predictor of DFU. Some  
19  
20 388 other studies also found age as a significant predictor [37–39] of DFU. In our study, it  
21  
22 389 was found that age below 50 years was a protective factor and age above this was  
23  
24 390 associated with development of DFU. This has also been supported by the other  
25  
26 391 studies that reported older age was a significant predictor [38,39].  
27

28  
29 392 Globally, the findings of the association of economic status and area of residence with  
30  
31 393 the risk of DFU are inconsistent. Our results show that lower economic status (monthly  
32  
33 394 income  $\leq 19,488$  BDT) and living in a rural area are the strong predictors of DFU. These  
34  
35 395 findings were consistent with the results of other studies conducted in India [25,28]  
36  
37 396 and Sri Lanka [40]. It was postulated that financial status is directly related to burden  
38  
39 397 of risk factors, which leads to complications of chronic diseases. This is because a lack  
40  
41 398 of financial resources interferes with the access to healthcare services, options of  
42  
43 399 treatments and hinders the adoption of preventive measures that are necessary to  
44  
45 400 avoid amputations [32]. Regarding place of residence, significant urban–rural risk  
46  
47 401 difference for DFU was explained by the study of Viswanathan et al. [35] and we  
48  
49 402 mentioned it in this section previously. However, one study has reported no  
50  
51 403 association for the aforementioned predictors [41].  
52

53 404 Our study found that the odds for risk of DFU were higher among insulin users, having  
54  
55 405 diabetic-related complications as nephropathy and retinopathy. Previous studies also  
56  
57 406 reported that use of insulin is a predictor of diabetic foot [30,42]. However, the exact  
58  
59 407 mechanism behind this has not yet been explored and this finding is thus inconclusive.  
60

1  
2  
3 408 It might be possible that when patients acquiesce to start insulin, they may already  
4  
5 409 have diabetes for a long time with greater associated complications [30].  
6

7  
8 410 Our findings of retinopathy and nephropathy are also supported by other studies  
9  
10 411 [21,39,43,44]. Regarding nephropathy, we found that about 10% of diabetic patients  
11  
12 412 had a history of amputation when they entered a dialysis program [45]. Several factors  
13  
14 413 might be responsible for an increased risk of DFU among nephropathy patients.  
15  
16 414 Coexistence of PN, peripheral vascular diseases, susceptibility to infection, minimal  
17  
18 415 self-care, dialysis therapy and anaemia [46]. On the other hand, one study has reported  
19  
20 416 that the prevalence of diabetic retinopathy is much higher (90%) among patients with  
21  
22 417 DFU than those who had no DFU [43]. Another study [44] used IWGDF risk classification  
23  
24 418 to predict DFU and they found that around 67.58% of patients had diabetic retinopathy  
25  
26 419 and they were included in the risk group 3, which was similar to our study. In this  
27  
28 420 regard, a systematic review and a meta-analysis show that both retinopathy and  
29  
30 421 nephropathy are microvascular complications. The impairment of microcirculation in  
31  
32 422 T2D may lead to secondary complications in lower extremity due to dysfunctional  
33  
34 423 vasodilatation. Moreover, patients of diabetic foot with retinopathy have higher level  
35  
36 424 of diabetic biomarkers like ceruloplasmin. Again, this ceruloplasmin is an independent  
37  
38 425 predictor of progression of diabetic nephropathy in T2D patients. Thus  
39  
40 426 aforementioned explanation implies a link between DFU, and retinopathy and  
41  
42 427 nephropathy [47].  
43

44 428 Previous history of trauma was identified as a significant predictor of DFU (group 3A,  
45  
46 429 OR 2.998,  $p < 0.001$ ; group 3B,  $p < 0.001$ ) in our study. This finding was similar to other  
47  
48 430 studies that reported a significant association between a previous history of trauma  
49  
50 431 and DFU [48–50]. However, the exact mechanism of a previous trauma leading to DFU  
51  
52 432 is not clear. As such, further research on this issue is required.  
53

### 54 433 **Limitations**

55  
56  
57 434 Our study has some limitations that should be mentioned. First, the participating  
58  
59 435 centres were not representative of the Bangladesh diabetes centres as a whole  
60

1  
2  
3 436 considering their geographical distribution as some areas were underrepresented or  
4  
5 437 not represented at all. Therefore, the results of our study cannot be extrapolated to  
6  
7 438 the general diabetic population in Bangladesh. Second, in our study some diabetes-  
8  
9 439 related complications were underrepresented, especially for diabetic retinopathy and  
10  
11 440 nephropathy. These co-morbidities were not based on real-time clinical examination  
12  
13 441 of eyes and assessment of kidney functions, rather based on diabetic record books  
14  
15 442 review. In a similar way, glycaemic status was evaluated using the values previously  
16  
17 443 recorded in the diabetic records of the subject instead of using a biochemical  
18  
19 444 measurement during data collection.

### 21 445 **Strengths**

22  
23  
24 446 Our study is important from the public health and clinical perspective. It is the first  
25  
26 447 study in Bangladesh that predicts DFU risk in a moderately large sample of T2D  
27  
28 448 population. Moreover, a multi-centric study recruited participants from world-  
29  
30 449 renowned DAB affiliated diabetes centres. The other strength of this study is sex- and  
31  
32 450 area-specific reporting of DFU risk among the study subjects. This difference will help  
33  
34 451 to address the men–women and urban–rural disparities in diabetes foot care in  
35  
36 452 Bangladesh and in remodelling the chain of diabetes centres where appropriate. The  
37  
38 453 clinicians of Bangladesh should concentrate more on these predictors in the  
39  
40 454 management of diabetic patients as these are associated with morbidity and mortality  
41  
42 455 resulting from DFU.

### 44 456 **Conclusion**

45  
46  
47 457 We found that a significant proportion of T2D population of Bangladesh is at a high  
48  
49 458 risk of DFU. The findings indicate that each diabetic patient must be screened for his  
50  
51 459 or her foot ulcer risk factors according to IWGDF recommendation. In this regard,  
52  
53 460 diabetic foot screening program can be introduced in the primary health care system  
54  
55 461 of Bangladesh. Based on the findings of this study, we also recommend that specialized  
56  
57 462 diabetic foot care centres should be established in both urban and rural areas to stop  
58  
59 463 the debilitating consequences of DFU.

## 464 **Funding**

465 This study was funded by the Norwegian Award for Masters Studies (NOMA) through  
466 University of Oslo, Norway, awarded to the Bangladesh Institute of Health Sciences,  
467 Bangladesh.

## 468 **Conflicts of Interest**

469 All authors have none to declare.

## 470 **Data statement**

471 Data are available as a supplementary file (see online supplementary file 5). All data  
472 relevant to the study are included in the article.

## 473 **Author statement**

474 Conceptualization, Palash Chandra Banik and Liaquat Ali; Data curation, Palash  
475 Chandra Banik and Rajib Mondal; Formal analysis, Palash Chandra Banik, Mohammad  
476 Moniruzzaman and Lingkan Barua; Methodology, Farhana Zaman, Mohammad  
477 Moniruzzaman and Liaquat Ali; Resources, Farhana Zaman and Rajib Mondal;  
478 Supervision, Liaquat Ali; Writing – original draft, Lingkan Barua.

## 479 **Acknowledgments**

480 The authors would like to thank the Head of the Department of Community Medicine,  
481 Prof. Dr MSA Mansur Ahmed for his kind cooperation in conducting the study and are  
482 grateful to Diabetic Association of Bangladesh (DAB) for allowing data collection from  
483 their chain diabetes care centres.

## 484 **References**

- 485 1. Wild S, Roglic G, Green A, Sicree R, King H. Global prevalence of diabetes:  
486 estimates for the year 2000 and projections for 2030. *Diabetes Care*.  
487 2004;**27**(5):1047–1053. doi:10.2337/diacare.27.5.1047
- 488 2. Ogurtsova K, da Rocha Fernandes J, Huang Y et al. IDF diabetes atlas: global

- 1  
2  
3 489 estimates for the prevalence of diabetes for 2015 and 2040. *Diabetes Res Clin*  
4  
5 490 *Pract.* 2017;**128**:40–50. doi:10.1016/j.diabres.2017.03.024  
6  
7  
8 491 3. Hutchinson A, McIntosh A, Feder G, Home PD, et al. (2000) *Clinical Guidelines*  
9  
10 492 *and Evidence Review for Type 2 Diabetes: Prevention and Management of Foot*  
11  
12 493 *Problems*. London: Royal College of General Practitioners. Available from:  
13  
14 494 www.rcgp.org.uk/clinspec/guidelines/diabetes/contents.asp  
15  
16 495 4. Akter S, Rahman M, Abe S, Sultana P. Prevalence of diabetes and prediabetes  
17  
18 496 and their risk factors among Bangladeshi adults: a nationwide survey. *Bull*  
19  
20 497 *World Health Organ.* 2014;**92**(3):204–213A. doi:10.2471/blt.13.128371  
21  
22 498 5. Saquib N, Saquib J, Ahmed T, Khanam M, Cullen M. Cardiovascular diseases  
23  
24 499 and type 2 diabetes in Bangladesh: a systematic review and meta-analysis of  
25  
26 500 studies between 1995 and 2010. *BMC Public Health.* 2012;**12**(1).  
27  
28 501 doi:10.1186/1471-2458-12-434  
29  
30  
31 502 6. Karthikesalingam A, Holt P, Moxey P, Jones K, Thompson M, Hinchliffe R. A  
32  
33 503 systematic review of scoring systems for diabetic foot ulcers. *Diabetic Medicine.*  
34  
35 504 2010;**27**(5):544–549. doi:10.1111/j.1464-5491.2010.02989.x  
36  
37 505 7. Eleftheriadou I, Tsapogas P, Tentolouris A et al. *Atlas of the Diabetic Foot.*  
38  
39 506 Malden, MA: Wiley-Blackwell; 2019.  
40  
41 507 8. Diabetic foot ulcers ,Äî effects on QOL, costs, and mortality and the role of  
42  
43 508 standard wound care and advanced-care therapies. *Wound management &*  
44  
45 509 *prevention.* [https://www.o-wm.com/content/diabetic-foot-ulcers-effects-qol-](https://www.o-wm.com/content/diabetic-foot-ulcers-effects-qol-costs-and-mortality-and-role-standard-wound-care-and-adv)  
46  
47 510 [costs-and-mortality-and-role-standard-wound-care-and-adv](https://www.o-wm.com/content/diabetic-foot-ulcers-effects-qol-costs-and-mortality-and-role-standard-wound-care-and-adv). Published  
48  
49 511 2019. Accessed June 11 November 13, 2019.  
50  
51  
52 512 9. Boyko E, Ahroni J, Smith D, Davignon D. Increased mortality associated with  
53  
54 513 diabetic foot ulcer. *Diabetic Medicine.* 1996;**13**(11):967–972.  
55  
56 514 doi:10.1002/(sici)1096-9136(199611)13:11<967::aid-dia266>3.3.co;2-b  
57  
58  
59  
60

- 1  
2  
3 515 10. Boulton A, Armstrong D, Albert S et al. Comprehensive foot examination and  
4  
5 516 risk assessment. *Endocrine Practice*. 2008;**14**(5):576–583.  
6  
7 517 doi:10.4158/ep.14.5.576  
8  
9  
10 518 11. Abbott C, Garrow A, Carrington A, Morris J, Van Ross E, Boulton A. Foot ulcer  
11  
12 519 risk is lower in South-Asian and African-Caribbean compared with European  
13  
14 520 diabetic patients in the U.K.: the North-West diabetes foot care study. *Diabetes*  
15  
16 521 *Care*. 2005;**28**(8):1869–1875. doi:10.2337/diacare.28.8.1869  
17  
18 522 12. Chaturvedi N, Stevens L, Fuller J, Lee E, Lu M. Risk factors, ethnic differences  
19  
20 523 and mortality associated with lower-extremity gangrene and amputation in  
21  
22 524 diabetes. The WHO multinational study of vascular disease in diabetes.  
23  
24 525 *Diabetologia*. 2001;**44**(S2):S65–S71. doi:10.1007/pl00002941  
25  
26 526 doi:10.1007/pl00002941  
27  
28  
29 527 13. Mørkrid K, Ali L, Hussain A. Risk factors and prevalence of diabetic peripheral  
30  
31 528 neuropathy: a study of type 2 diabetic outpatients in Bangladesh. *Int J Diabetes*  
32  
33 529 *Dev Ctries*. 2010;**30**(1):11. doi:10.4103/0973-3930.60004  
34  
35 530 14. Akbari C, Logerfo. Vascular disease of the lower extremities in diabetes mellitus:  
36  
37 531 etiology and management, In *Joslin's Diabetes Mellitus*, 14th ed.; Kahn, C.  
38  
39 532 Ronald; Weir, Gordon C.; King, George L.; Moses, Alan C.; Smith, Robert J.;  
40  
41 533 Jacobson, Alan M. Lippincott Williams & Wilkins, USA. 2005:1124–1131.  
42  
43  
44 534 15. Bonita R. *Surveillance of Risk Factors for Noncommunicable Diseases: The WHO*  
45  
46 535 *Stepwise Approach: Summary*. Geneva: Noncommunicable Disease and Mental  
47  
48 536 Health, World Health Organization; 2001.  
49  
50 537 16. Non-communicable disease risk factor survey, Bangladesh 2010. Who.int.  
51  
52 538 [https://www.who.int/ncds/surveillance/steps/2010\\_STEPS\\_Report\\_Bangladesh.](https://www.who.int/ncds/surveillance/steps/2010_STEPS_Report_Bangladesh.pdf)  
53  
54 539 pdf. Published 2011  
55  
56  
57 540 17. Lavery L, Peters E, Williams J, Murdoch D, Hudson A, Lavery D. Reevaluating the  
58  
59 541 way we classify the diabetic foot: restructuring the diabetic foot risk  
60

- 1  
2  
3 542 classification system of the International Working Group on the Diabetic Foot.  
4  
5 543 *Diabetes Care*. 2007;**31**(1):154–156. doi:10.2337/dc07-1302.doi:10.2337/dc07-  
6  
7 544 1302
- 8  
9  
10 545 18. Lavery L, Armstrong D, Vela S, Quebedeaux T, Fleischli J. Practical criteria for  
11  
12 546 screening patients at high risk for diabetic foot ulceration. *Arch Intern Med*.  
13  
14 547 1998;**158**(2):157. doi:10.1001/archinte.158.2.157
- 15  
16 548 19. Sibbald RG, Ayello EA, Alavi A, et al. Screening for the high-risk diabetic foot.  
17  
18 549 *Advances in Skin & Wound Care* 2012;**25**:465–76.  
19  
20 550 doi:10.1097/01.asw.0000421460.21773.7b
- 21  
22  
23 551 20. Lavery L, Armstrong D, Murdoch D, Peters E, Lipsky B. Validation of the  
24  
25 552 Infectious Diseases Society of America's diabetic foot infection classification  
26  
27 553 system. *Clinical Infectious Diseases*. 2007;**44**(4):562–565.  
28  
29 554 doi:10.1086/511036.doi:10.1086/511036
- 30  
31 555 21. Shahbazian H, Yazdanpanah L, Latifi S. Risk assessment of patients with  
32  
33 556 diabetes for foot ulcers according to risk classification consensus of  
34  
35 557 international working group on diabetic foot (IWGDF). *Pak J Med Sci*.  
36  
37 558 2013;**29**(3). doi:10.12669/pjms.293.3473
- 38  
39  
40 559 22. Monteiro-Soares M, Vaz-Carneiro A, Sampaio S, Dinis-Ribeiro M. Validation  
41  
42 560 and comparison of currently available stratification systems for patients with  
43  
44 561 diabetes by risk of foot ulcer development. *Eur J Endocrinol*. 2012;**167**(3):401–  
45  
46 562 407. doi:10.1530/eje-12-0279
- 47  
48 563 23. Dubský M, Jirkovská A, Bem R et al. Risk factors for recurrence of diabetic foot  
49  
50 564 ulcers: prospective follow-up analysis in the Eurodiale subgroup. *Int Wound J*.  
51  
52 565 2012;**10**(5):555–561. doi:10.1111/j.1742-481x.2012.01022.x
- 53  
54  
55 566 24. Naik BN, Srinivasan M, Reddy MM, Kanungo S, Sarkar S, Kar SS. Diabetes foot  
56  
57 567 ulcer risk: a public health concern in rural Pondicherry!! *National Journal of*  
58  
59 568 *Community Medicine*. 2018;**9**:755–9.
- 60

- 1  
2  
3 569 25. Vibha S, Kulkarni M, Kirthinath Ballala A, Kamath A, Maiya G. Community based  
4  
5 570 study to assess the prevalence of diabetic foot syndrome and associated risk  
6  
7 571 factors among people with diabetes mellitus. *BMC Endocr Disord*. 2018;**18**(1).  
8  
9 572 doi:10.1186/s12902-018-0270-2  
10  
11  
12 573 26. Peters E, Lavery L. Effectiveness of the diabetic foot risk classification system of  
13  
14 574 the International Working Group on the Diabetic Foot. *Diabetes Care*.  
15  
16 575 2001;**24**(8):1442–1447. doi:10.2337/diacare.24.8.1442  
17  
18 576 27. Hunt, D. Diabetes: foot ulcers and amputations. *BMJ Clinical Evidence* 2009.  
19  
20  
21 577 28. Jyotsna V, Kishore S, Upadhyay A. Categories of foot at risk in patients of  
22  
23 578 diabetes at a tertiary care center: insights into need for foot care. *Indian J*  
24  
25 579 *Endocrinol Metab*. 2015;**19**(3):405. doi:10.4103/2230-8210.152789  
26  
27 580 29. A C, Valame S. Diabetic foot risk assessment and foot care among patients  
28  
29 581 attending tertiary care hospital in central India. *J Evol Med Dent Sci*.  
30  
31 582 2017;**6**(72):5153–5158. doi:10.14260/jemds/2017/1119  
32  
33  
34 583 30. Yazdanpanah L, Shahbazian H, Nazari I et al. Incidence and risk factors of  
35  
36 584 diabetic foot ulcer: a population-based diabetic foot cohort (ADFC study)—  
37  
38 585 two-year follow-up study. *Int J Endocrinol*. 2018;2018:1–9.  
39  
40 586 doi:10.1155/2018/7631659  
41  
42 587 31. Kumar M, Valame S. Risk of diabetic foot in diabetics with micro and  
43  
44 588 macrovascular complications. *J Evol Med Dent Sci*. 2014;**3**(67):14467–14477.  
45  
46 589 doi:10.14260/jemds/2014/3941.  
47  
48  
49 590 32. Rossaneis M, Haddad M, Mathias T, Marcon S. Differences in foot self-care and  
50  
51 591 lifestyle between men and women with diabetes mellitus. *Rev Lat Am*  
52  
53 592 *Enfermagem*. 2016;**24**(0). doi:10.1590/1518-8345.1203.2761  
54  
55 593 33. Mansyur C, Rustveld L, Nash S, Jibaja-Weiss M. Social factors and barriers to  
56  
57 594 self-care adherence in Hispanic men and women with diabetes. *Patient Educ*  
58  
59 595 *Couns*. 2015;**98**(6):805–810. doi:10.1016/j.pec.2015.03.001  
60



- 1  
2  
3 596 34. Tang Z, Chen H, Zhao F. Gender differences of lower extremity amputation risk  
4  
5 597 in patients with diabetic foot. *Int J Low Extrem Wounds*. 2014;**13**(3):197–204.  
6  
7 598 doi:10.1177/1534734614545872  
8  
9  
10 599 35. 5. Viswanathan V, Madhavan S, Rajasekar S, Chamukuttan S, Ambady R. Urban-  
11  
12 600 rural differences in the prevalence of foot complications in South-Indian  
13  
14 601 diabetic patients. *Diabetes Care*. 2006;**29**(3):701–703.  
15  
16 602 doi:10.2337/diacare.29.03.06.dc05-1777  
17  
18 603 36. Vijay V, Snehalata C, Ramachandran A. Socio cultural practices that may affect  
19  
20 604 the development of the diabetic foot. *IDF Bulletin*. 1997;**42**(4):10–13.  
21  
22  
23 605 37. Armstrong D, Holtz-Neiderer K, Wendel C, Mohler M, Kimbriel H, Lavery L. Skin  
24  
25 606 temperature monitoring reduces the risk for diabetic foot ulceration in high-  
26  
27 607 risk patients. *Am J Med*. 2007;**120**(12):1042–1046.  
28  
29 608 doi:10.1016/j.amjmed.2007.06.028  
30  
31 609 38. 2. Monami M, Vivarelli M, Desideri C, Colombi C, Marchionni N, Mannucci E.  
32  
33 610 Pulse pressure and prediction of incident foot ulcers in type 2 diabetes.  
34  
35 611 *Diabetes Care*. 2009;**32**(5):897–899. doi:10.2337/dc08-1679  
36  
37  
38 612 39. Margolis D, Hofstad O, Feldman H. Association between renal failure and foot  
39  
40 613 ulcer or lower-extremity amputation in patients with diabetes. *Diabetes Care*.  
41  
42 614 2008;**31**(7):1331–1336. doi:10.2337/dc07-2244  
43  
44 615 40. Sriyani K, Wasalathanthri S, Hettiarachchi P, Prathapan S. Predictors of diabetic  
45  
46 616 foot and leg ulcers in a developing country with a rapid increase in the  
47  
48 617 prevalence of diabetes mellitus. *PLoS ONE*. 2013;**8**(11):e80856.  
49  
50 618 doi:10.1371/journal.pone.0080856  
51  
52  
53 619 41. Sriussadaporn S, Mekanandha P, Vannasaeng S et al. Factors associated with  
54  
55 620 diabetic foot ulceration in Thailand: a case-control study. *Diabetic Medicine*.  
56  
57 621 1997;**14**(1):50–56. doi:10.1002/(sici)1096-9136(199701)14:1<50::aid-  
58  
59 622 dia292>3.0.co;2-6  
60

- 1  
2  
3 623 42. Monteiro-Soares M, Boyko E, Ribeiro J, Ribeiro I, Dinis-Ribeiro M. Predictive  
4 factors for diabetic foot ulceration: a systematic review. *Diabetes Metab Res Rev.*  
5 624 *Diabetes Metab Res Rev.* 2012;**28**(7):574–600. doi:10.1002/dmrr.2319  
6  
7 625  
8  
9  
10 626 43. Hwang D, Lee K, Park M et al. Association between diabetic foot ulcer and  
11 diabetic retinopathy. *PLoS ONE.* 2017;**12**(4):e0175270.  
12 627 doi:10.1371/journal.pone.0175270  
13  
14 628  
15  
16 629 44. Kamath Y, Karam T, Rao L, Rao K, Shenoy S, Bhandary S. Diabetic retinopathy  
17 in patients with diabetic foot syndrome in South India. *Indian J Ophthalmol.*  
18 630 *Indian J Ophthalmol.* 2018;**66**(4):547. doi:10.4103/ijo.ijo\_1000\_17  
19 631  
20  
21  
22 632 45. 9. Papanas N, Liakopoulos V, Maltezos E, Stefanidis I. The diabetic foot in end  
23 stage renal disease. *Ren Fail.* 2007;**29**(5):519–528.  
24 633 doi:10.1080/08860220701391662  
25  
26 634  
27  
28 635 46. 10. Valabhji J. Foot problems in patients with diabetes and chronic kidney  
29 disease. *J Ren Care.* 2012;**38**:99–108. doi:10.1111/j.1755-6686.2012.00284.x  
30 636  
31  
32  
33 637 47. Zhang P, Lu J, Jing Y, Tang S, Zhu D, Bi Y. Global epidemiology of diabetic foot  
34 ulceration: a systematic review and meta-analysis. *Ann Med.* 2016;**49**(2):106–  
35 638 116. doi:10.1080/07853890.2016.1231932  
36  
37 639  
38  
39 640 48. 13. Nongmaithem M, Bawa A, Pithwa A, Bhatia S, Singh G, Gooptu S. A study  
41 of risk factors and foot care behavior among diabetics. *J Family Med Prim Care.*  
42 641 *J Family Med Prim Care.* 2016;5(2):399. doi:10.4103/2249-4863.192340  
43 642  
44  
45 643 49. Sharma D, Sharma D, Gothwal D, Dixit D, Lunia D, Sharma D. Diabetic foot  
46 ulcers: a prospective study of 100 patients based on wound based severity  
47 644 score. *IOSR Journal of Dental and Medical Sciences.* 2014;**13**(1):79–89.  
48  
49 645  
50 646 doi:10.9790/0853-13187989  
51  
52  
53 647 50. Nyamu P, Otieno C, Amayo E, Mcligeyo S. Risk factors and prevalence of  
54 diabetic foot ulcers at Kenyatta National Hospital, Nairobi. *East Afr Med J.*  
55 648 *East Afr Med J.* 2004;**80**(1). doi:10.4314/eamj.v80i1.8664  
56  
57  
58  
59 649  
60

1  
2  
3  
4  
5  
6  
7  
8  
9  
10  
11  
12  
13  
14  
15  
16  
17  
18  
19  
20  
21  
22  
23  
24  
25  
26  
27  
28  
29  
30  
31  
32  
33  
34  
35  
36  
37  
38  
39  
40  
41  
42  
43  
44  
45  
46  
47  
48  
49  
50  
51  
52  
53  
54  
55  
56  
57  
58  
59  
60



# BANGLADESH UNIVERSITY OF HEALTH SCIENCES

## Faculty of Public Health

Department of Noncommunicable Diseases (NCD)

### TRAINING MODULE ON DETECTION OF DIABETIC FOOT PROBLEM AT THE EARLY STAGE

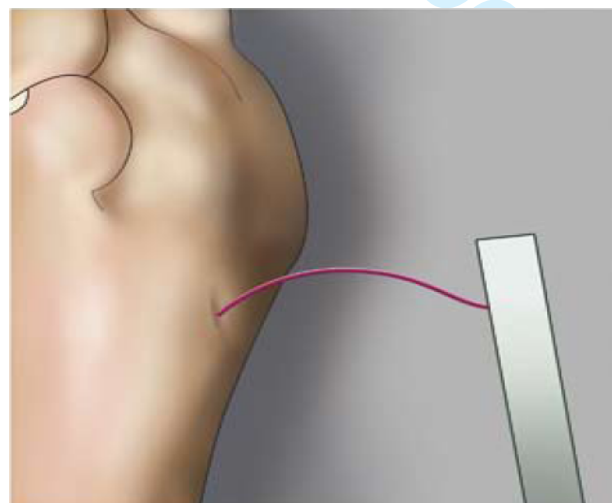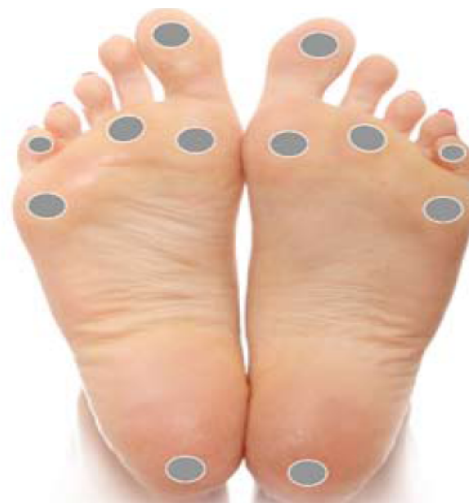

By

Palash Chandra Banik, Nirmalandu Bikash Bhowmik and Professor Liaquat Ali

March 2017

[www.buhs.ac.bd](http://www.buhs.ac.bd)

Collaboration with

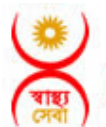

Health Care Development Project (HCDP) of BADAS

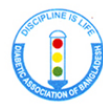

Diabetic Association of Bangladesh

**Bangladesh University of Health Sciences (BUHS)**

125/1, Darus Salam, Mirpur-1, Dhaka-1216, Bangladesh.

Phone: 00 880 2 9010952; 9010932

1  
2  
3  
4  
5  
6  
7  
8  
9  
10  
11  
12  
13  
14  
15  
16  
17  
18  
19  
20  
21  
22  
23  
24  
25  
26  
27  
28  
29  
30  
31  
32  
33  
34  
35  
36  
37  
38  
39  
40  
41  
42  
43  
44  
45  
46  
47  
48  
49  
50  
51  
52  
53  
54  
55  
56  
57  
58  
59  
60

***Table of Content***

| <b>SI No</b> | <b>List of contents</b>                           | <b>Page</b> |
|--------------|---------------------------------------------------|-------------|
| 01           | Introduction                                      | 2           |
| 02           | Objectives                                        | 2           |
| 03           | Screening for high risk patient: overview         | 3           |
| 04           | Screening for high risk patient: Sensation        | 4           |
| 05           | Screening for high risk patient: Foot Deformities | 7           |
| 06           | Screening for high risk patient: Vascular         | 11          |
| 07           | Screening for high risk patient: Foot mobility    | 15          |

1  
2  
3  
4  
5  
6  
7  
8 **Acknowledgement to**  
9

- 10  
11  
12 **1. Dr. Farhana Zaman MBBS, MPH (CM) Sr Lecturer, Dept of Community**  
13 **Medicine, BIHS.**  
14  
15 **2. Md. Moniruzzaman, Sr Research fellow, Dept of Community Medicine, BIHS.**  
16  
17  
18  
19  
20  
21  
22  
23  
24  
25  
26  
27  
28  
29  
30  
31  
32  
33  
34  
35  
36  
37  
38  
39  
40  
41  
42  
43  
44  
45  
46  
47  
48  
49  
50  
51  
52  
53  
54  
55  
56  
57  
58  
59  
60

## **Introduction**

### **Why foot care is important for patients with Type 2 Diabetes?**

Foot problems from diabetes represent a significant burden of care for primary care physicians. Most of the adverse outcomes of a diabetic foot are preventable with resources currently available in primary care settings where most patients with diabetes get their care.

### **The Center for Disease Control estimates that in 2010:**

- 1 in 12 adults Americans, and 1 in 4 adult American Indians, has diabetes.
- Approximately 90% of these patients are managed by primary care providers.
- Of the diabetes patients seen, 20% will present with an acute foot problem.
- Over the course of their care, 15% will experience a foot ulcer.
- 5 – 10% will need lower limb amputation.
- 50% of those who get an amputation die within 5 years.

### **How is this training set up?**

#### **This Training can be used in a variety of different ways:**

- Read the Essential Elements that offer a detailed explanation.
- Just want the key points? Then browse through the Quick Facts.
- Use these printable notes if you want to be able to write alongside the information offered.

Feel free to use any of these avenues to better enhance your learning needs.

### **Objectives:**

#### **At the end of this training, you will be able to:**

1. List four risk factors for diabetic foot complications.
2. Be able to conduct a complete diabetic foot exam.

## Screening for High Risk Patients: Overview

Foot ulceration and amputation are preventable with resources currently available in primary care settings where most patients with diabetes get their care. There are several principle risk factors for ulceration and lower extremity amputation (LEA) among patients with diabetes:

- Neuropathy
- Deformity
- Limited joint mobility
- Prior ulcer/ LEA
- PVD
- Onychomycosis

**It is also important to assess non-foot related risk factors; some of them are potentially modifiable:**

- Male sex
- Duration of diabetes
- Age
- Hyperglycemia
- Hypertension
- Dyslipidemia
- Smoking
- Poor vision
- Other complications such as renal disease

Patients at high risk for foot ulcer and amputation can be identified with simple criteria that involve several testing and inspection measures. Patients with all normal criteria are at low-risk, while those with insensitivity, deformity, absent pulses, or prior foot ulcers or amputations are at high-risk. These simple criteria have been validated in Indian Health Services (IHS) and adopted by most professional and public health organizations including the American Diabetes Association (ADA) and World Health Organization (WHO).

- Sensory testing with a 10 gram monofilament
- Foot inspection for deformity
- Reports of prior ulcer or amputation
- Checking for pedal pulses and taking measurements for an ABI pressure
- Checking joint mobility with goniometer

## Screening for High Risk Patients: Sensation

A test using a 10 g monofilament is the recommended method for assessing for neuropathy of the foot. Loss of protective sensation at any site on the foot indicates evidence of neuropathy, increasing the risk of ulceration and other complications.

**Equipment:** 10 g monofilament

Monofilament is the test used to help identify high risk feet in people with diabetes. The monofilament exam involves using a 10 gram monofilament to test sensation on the tip of the great toe, little figure and 1st, 3rd and 5th metatarsal heads & heel of each foot.

**The technique for monofilament testing is as follows:**

### Directions for use of Semmes- Weinstein Monofilament

1. Assess integrity of monofilament (no bends/breaks).
2. Show the monofilament to the patient. Place the end of the monofilament on his/her hand or arm to show that the testing procedure will not hurt.
3. Ask the patient to turn his/her head and close his/her eyes or look at the ceiling.
4. Hold the monofilament perpendicular to the skin.

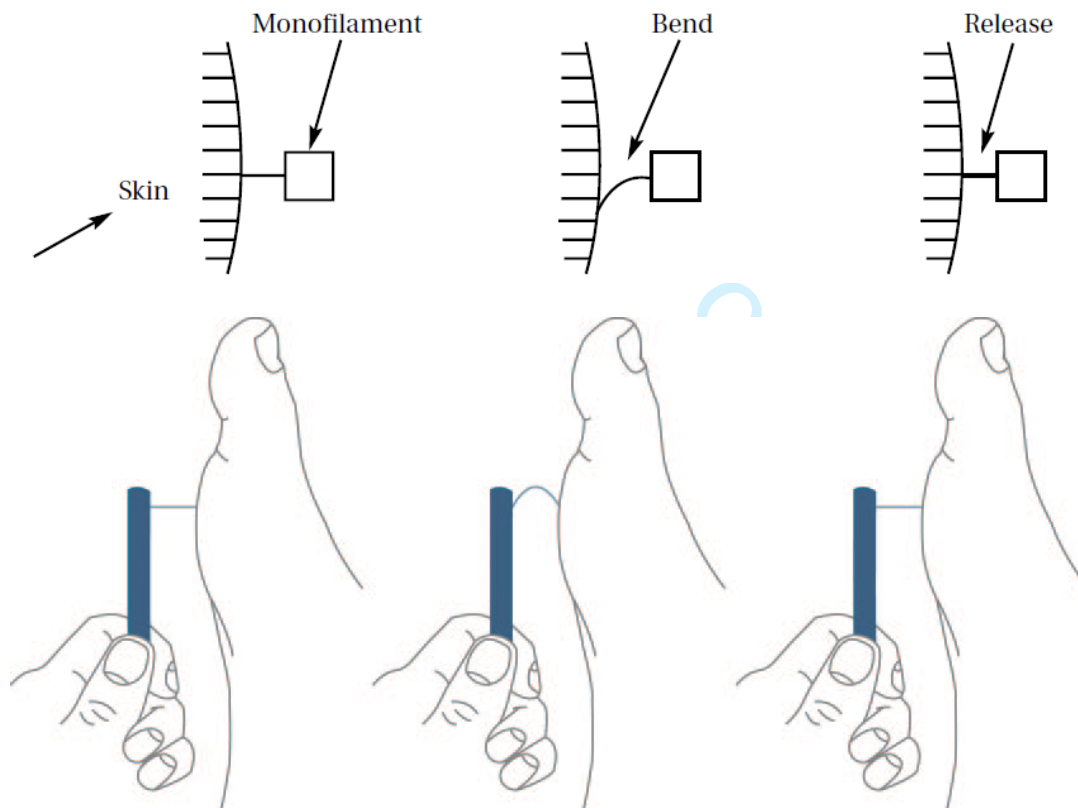

5. Place the end of the monofilament on the sole of the foot. Ask the patient to say 'yes' when he/she feels you touching his/her foot with the monofilament. **DO NOT ASK THE PATIENT "did you feel that?"** If the patient does not say "yes" when you touch a given



testing site, continue on to another site. When you have completed the sequence RETEST the area(s) where the patient did not feel monofilament.

6. Push the monofilament until it bends, then hold for 1-3 seconds.

7. Lift the monofilament from the skin. Do not brush or slide along the skin.

8. Repeat the sequence randomly at each testing site on the foot (see pictures below).

### Sites on the sole of the foot for monofilament testing

Loss of protective sensation = absent sensation at one or more sites

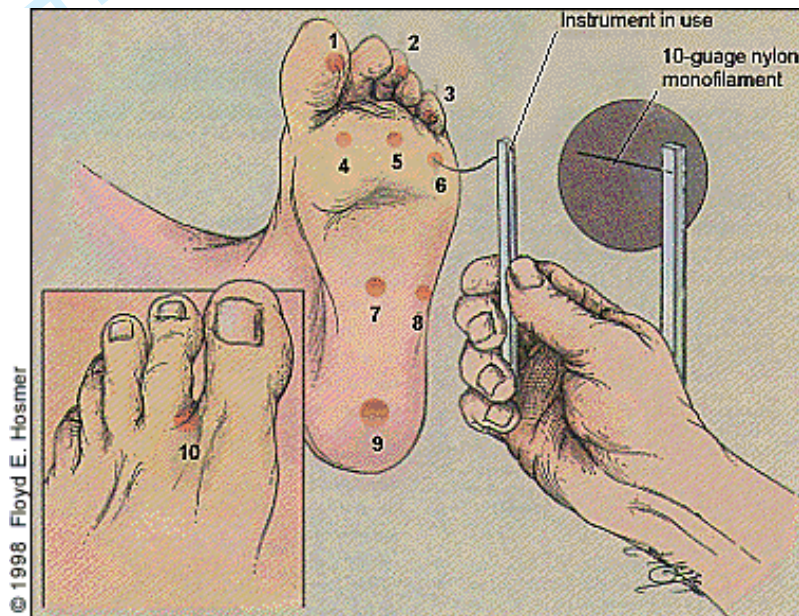

Using the monofilament, test the sites listed. Do not test over heavy callus.

- digits: 1st, 3rd, 5th
- MTH: 1st, 3rd, 5th
- midfoot: Medial, Lateral
- heel
- top (*dorsum*) of foot

#### **N. B.:**

Apply only to intact skin. Avoid calluses, ulcerated or scarred areas. DO NOT use a rapid or tapping movement.

- If the monofilament accidentally slides along the skin, re-test that area later in the testing sequence.
- Store the monofilament according to the manufacturer's instructions.
- Clean the monofilament according to agency infection control protocols.
- The filament should be cleaned after use with an alcohol swab or dilute bleach solution and returned to its case.
- Do not apply the filament directly on an ulcer, callous, scar or necrotic tissue. Apply the filament on near-by normal tissue.

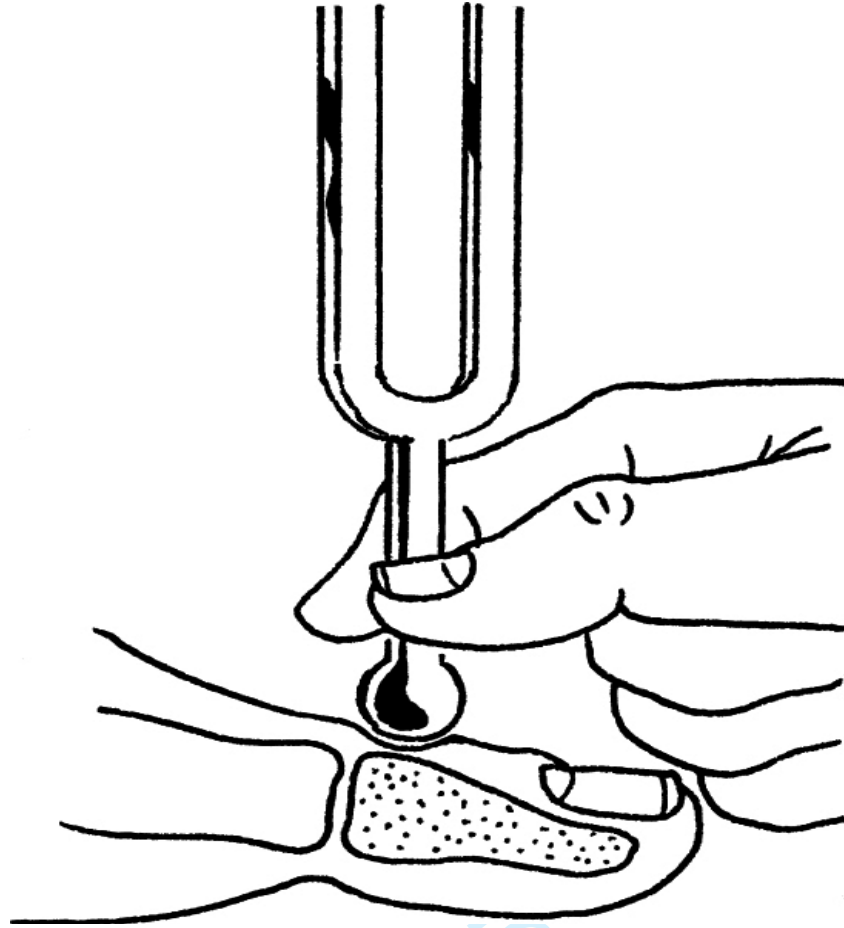

Figure: How to use a tuning fork

### Tuning fork

- The sensory examination should be carried out in a quiet and relaxed setting. First, apply the tuning fork on the patient's wrists (or elbow or clavicle) so that he/she knows what to expect.
- The patient must not be able to see whether or where the examiner applies the tuning fork. The tuning fork is applied on a bony part on the dorsal side of the distal phalanx of the first toe.
- The tuning fork should be applied perpendicularly with constant pressure.
- Repeat this application twice, but alternate this with at least one 'mock' application in which the tuning fork is not vibrating.
- ***The test is positive if the patient incorrectly answers at least two out of three applications, ('at risk for ulceration') and negative with two out of three correct answers. (A test is positive if it identifies the risk).***
- If the patient is unable to sense the vibrations on the big toe, the test is repeated more proximally (malleolus, tibial tuberosity).
- Encourage the patient during testing by giving a positive feedback.

## Screening for High Risk Patients: Foot Deformities

To understand foot deformities, it is important to recognize that foot structure and function is incredibly complex and can easily go awry. Normal foot architecture is maintained through a balance of forces applied by muscles and tendons on bones. Atrophy of a muscle group through nerve damage can lead to deformity. It is important to watch areas that can be open to friction and repetitive micro-trauma as those sites can lead to callus and ulceration.

### Types of foot deformities include:

- The **bunion**, or **hallux valgus**, increases the risk for ulceration through a mechanism of increased pressures and friction and repetitive micro-trauma that out paces the healing capacity at the bunion site.
- **Hammer** and **claw toe** deformities develop from atrophy of the small muscles between the toes. Both the dorsal and plantar aspects of the involved toes are at risk for friction and pressure related trauma with subsequent ulceration.
- **Charcot foot** is one of the most severe diabetic foot deformity in which the entire mid-section of the foot collapses and forms a classic “rocker bottom” sole. It is caused by a combination of sensory and autonomic nerve dysfunction in which microscopic fractures to the tarsal bones trigger an inflammatory response and subsequent dissolution of the tarsal and metatarsal bones of the foot. The arch becomes inverted, which causes high plantar pressures, and is at extreme risk for ulceration.

Bunion

Charcot Foot

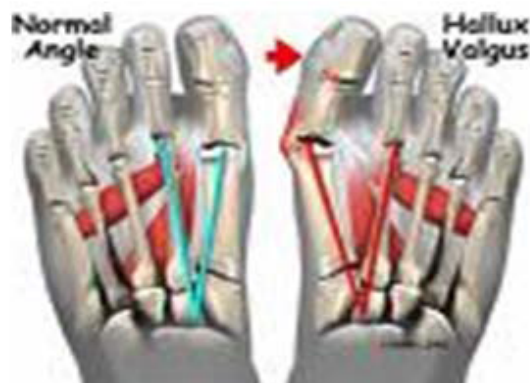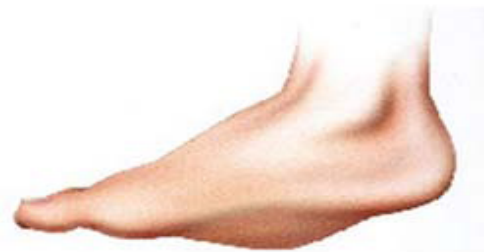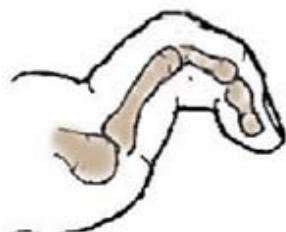

Claw toe

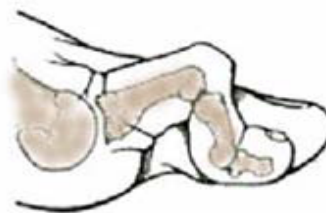

Hammer toe

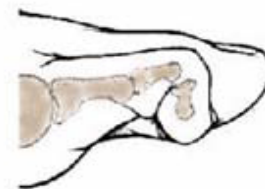

Mallet toe

Hammer toe and other toe deformities

1  
2  
3  
4  
5  
6  
7  
8  
9  
10  
11  
12  
13  
14  
15  
16  
17  
18  
19  
20  
21  
22  
23  
24  
25  
26  
27  
28  
29  
30  
31  
32  
33  
34  
35  
36  
37  
38  
39  
40  
41  
42  
43  
44  
45  
46  
47  
48  
49  
50  
51  
52  
53  
54  
55  
56  
57  
58  
59  
60

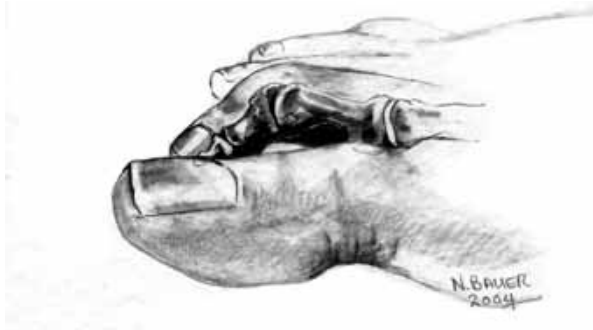

**Hammer toe – bent middle joint**

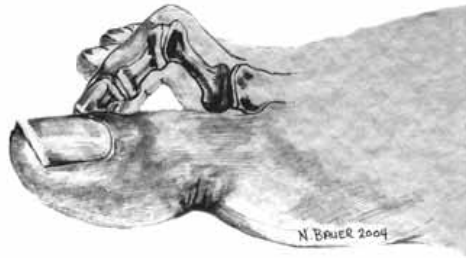

**Claw Toe – joint at base of toe is bent up and middle joint is bent down**

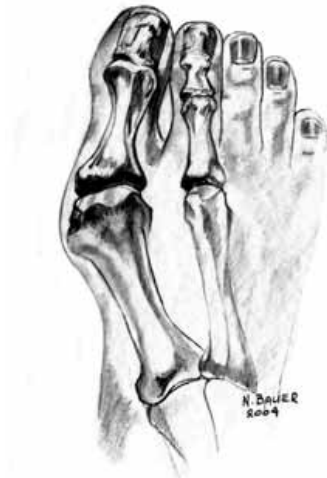

**Halgus Valgus or Small Bunion (Mild/Moderate)**  
– joint at the base of big toe is pushed to the side

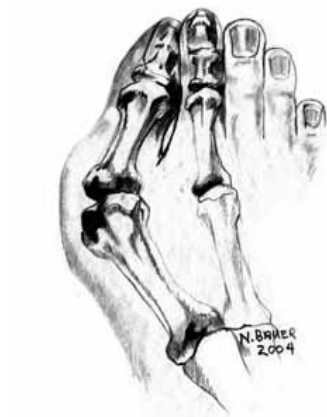

**Hallus Valgus or Large Bunion (Severe)**  
– big toe may move under second toe

1  
2  
3  
4  
5  
6  
7  
8  
9  
10  
11  
12  
13  
14  
15  
16  
17  
18  
19  
20  
21  
22  
23  
24  
25  
26  
27  
28  
29  
30  
31  
32  
33  
34  
35  
36  
37  
38  
39  
40  
41  
42  
43  
44  
45  
46  
47  
48  
49  
50  
51  
52  
53  
54  
55  
56  
57  
58  
59  
60

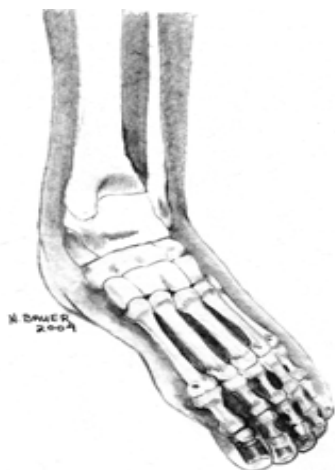

**Pes Planus**

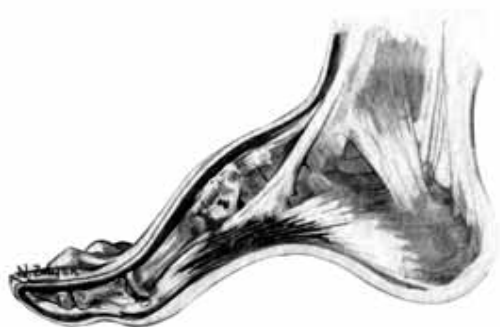

**Pes Cavus**

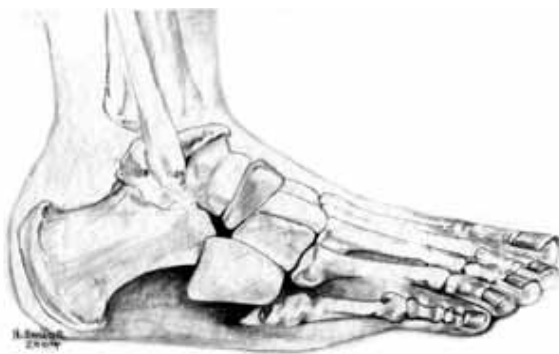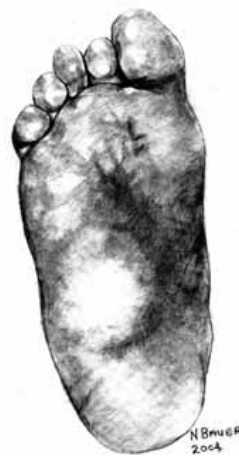

**Charcot Arthropathy**

1  
2  
3 Pes planus produces flattening of the foot. Pes planus feet have increased lateral  
4 talometatarsal angle and increased second metatarsal length (Ledoux, Shofer, Ahroni,  
5 Smith, Sangeorzan & Boyko, 2003). There are many reasons for this condition, the first  
6 of which is heredity. Many have this condition and never have any problems of any kind.  
7

8 However, others will have this condition created through years in soft, unsupportive  
9 shoes on hard surfaces, injury, pregnancy, or other factors. This often leads to other  
10 problems.  
11

12 The arch in the foot is caused by a broad band of fibrous connective tissue, called the  
13 longitudinal ligament. A ligament is nothing more than connective tissue that connects  
14 bone to bone. The longitudinal ligament connects the metatarsal phalangeal joints to the  
15 os calcis or heel bone. Like a string on a bow, they hold the two ends together and create  
16 an arch. This arch is a shock absorption structure and it also helps to maintain all the  
17 tarsals in proper erect anatomic position. As this arch decreases, impact from the  
18 concrete becomes worse.  
19  
20

21 When the arch ligament stretches or tears, the arch falls. If it falls far enough, the tarsals  
22 may begin to shift to the inside or create pronation or a valgus (greater than 90 degree  
23 erect) position at the ankle. This can cause problems in the origin area, (the metatarsals)  
24 or in the heel. It also may cause pressure on the medial (inner) knee and perhaps the hip  
25 and back. It is like pulling the string on a marionette too tight, the result is a kinked mass  
26 on one side. The human body is much the same, put too much tension on major muscle  
27 groups and the joints kink and yell back.  
28  
29

30 In pes cavus, the arch is abnormally high on weight bearing. The heel is often tilted  
31 inwards at the ankle (but not always). In many, the toes will appear clawed. When not  
32 standing the front half of the foot (forefoot) will appear to be dropped below the level of  
33 the rear foot. Ledoux et al. (2003) identified biomechanical differences among pes planus  
34 and pes cavus feet in persons with diabetes. They found pes cavus feet had more  
35 prominent metatarsal heads, bony prominences, hammer/claw toes, increased hallux  
36 dorsiflexion and Pes Cavus decreased hallux plantarflexion.  
37  
38

39 Charcot joint is a form of neuroarthropathy that occurs most often in the foot. **Nerve**  
40 **damage from diabetes causes decreased sensation, muscle and ligamental atrophy**  
41 **and subsequent joint instability.** Walking on this insensitive and weakened joint can  
42 cause even more damage to the foot structure. In the acute stage there is inflammation  
43 and bone reabsorption which destroys the bone. In later stages, the arch falls and the foot  
44 may develop a rocker bottom appearance. Weight distribution of the sole is altered  
45 causing deformities leading to pressure points that enhance ulcer development. Signs to  
46 assess for are: hot on the onset, pain, discomfort, erythema, swelling, rigid deformities,  
47 limited joint mobility, callus formation (ADA, 2001; Bowker & Pfeifer, 2001). One in  
48 680 people with diabetes develop Charcot joint with an incidence of 9-12% individuals  
49 with documented diabetic peripheral neuropathy (Royal Melbourne Hospital, 2002). It is  
50 important that the Charcot foot is recognized early so that appropriate treatment of the  
51 foot can be provided to prevent further injury and promote a stable foot (Lavery et al.,  
52 1998).  
53  
54  
55  
56  
57  
58  
59

## Screening for high risk patient: Vascular

There are three non-invasive assessments for detecting peripheral vascular disease:

- **The palpitation of pedal pulses is most simple and fastest.** The dorsalis pedis and posterior tibial are the two main arteries in the foot.

- o The dorsalis pedis is on the dorsum or top of the foot.

- o The posterior tibial is palpitated behind the medial malleolus, or inside the ankle bone.

### Pedal Pulse Assessment:

Locating a pedal pulse is part of the trauma patient assessment and performed before and after lower extremity splint application as well as long backboard immobilization. Locating a pedal pulse can be difficult even in healthy patients. Use these tips to find a patient's pedal pulse:

- 1) First assess the patient's radial pulse rate and rhythm so you know what you are seeking.

- 2) Move shoes, socks, tights, and anklets out of the way to expose the patient's skin.

- 3) Move, if not compromised by injury, the patient's foot towards the normal anatomical position.

- 4) Check for either the dorsalis pedis pulse (on the top of the foot) or the posterior tibial pulse (located behind the medial malleolus — the ankle bone).

- 5) For dorsalis pedis, first visualize because you might see the skin pulsating above the artery. If you are unable to see anything, hold two or more fingers lightly against the skin. Move up from the toes towards the leg until you locate the pulse.

- 6) For posterior tibial — on the medial side of the ankle — use two or more fingers. If find more pressure is needed to find this pulse.

If you are unable to find the pedal pulse on one leg, switch to the patient's other leg. Knowing the location of one pulse might help you find the other.

Once you have found a pedal pulse, consider using a ballpoint or felt pen to make a light mark at the pulse location to make reassessment easier. Finally, if the patient's foot is warm with normal color, it is adequately perfused.

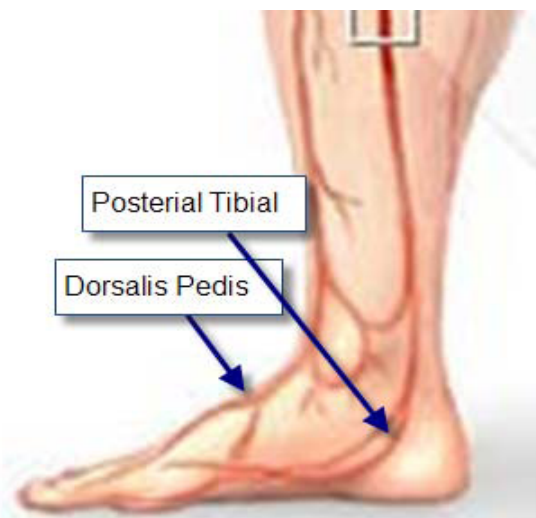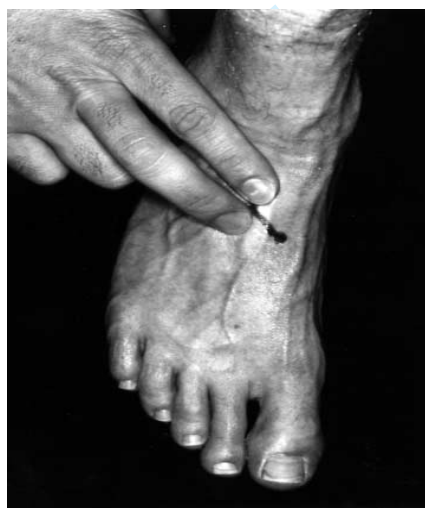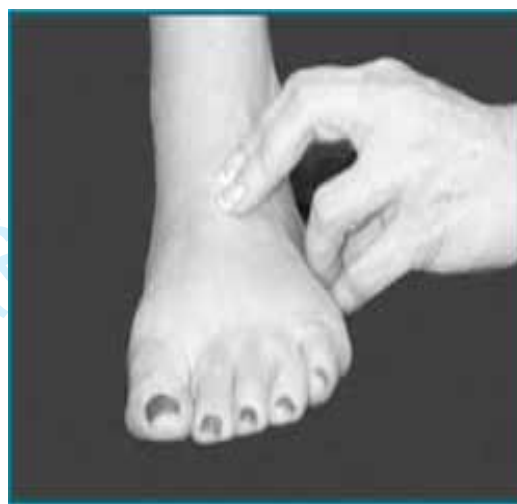

**Dorsalis Pedis:** To palpate pulse, place fingers just lateral to the extensor tendon of the great toe. If you cannot feel a pulse, move fingers more laterally.

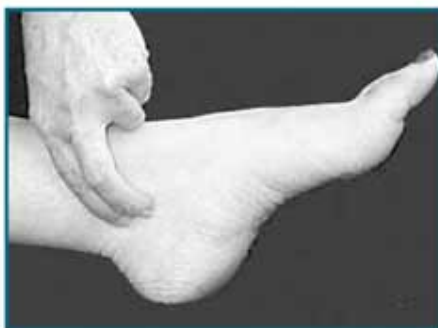

**Posterior Tibial:** To palpate pulse, place fingers behind and slightly below the medial malleolus of the ankle. In an obese or edematous ankle, the pulse may be more difficult to feel.

While the dorsalis pedis is easier to palpitate, it is congenitally absent in approximately 8-15% of individuals.



## **Ankle Brachial Index (ABI):**

• An Ankle Brachial Index (ABI) can be performed with a handheld Doppler and a blood pressure cuff.

### **To obtain an ABI:**

#### ***1. First measure brachial pressures in each arm.***

- Apply the cuff to the upper arm
- Locate the brachial pulse with the Doppler and mark with a pen
- Inflate the cuff, apply Doppler, deflate the cuff and record the pressure at which flow is heard.

#### ***2. Next measure pressure in each ankle.***

- Apply cuff to the calf
- Locate the posterior tibial pulse with the Doppler and mark with a pen.
- Inflate the cuff, apply Doppler, deflate the cuff and record the pressure at which the flow is heard.

3. **To calculate ABI**, divide the ankle pressure by the greater of the toe brachial pressures. While there is no clear threshold for increased risk, most accept a value of below 0.9 or 0.8 as conferring moderately high risk.

**Example:** Calculate ankle brachial index by dividing systolic ankle pressure by systolic brachial pressure e.g. ankle pressure is 120 mmHg and brachial pressure is 132 mmHg, ankle brachial index is  $120/132 = 0.9$

Some data suggests the Toe BI measurement is more accurate than the ABI, but it requires specialized equipment and is not routine in primary care.

|                           |               |                                                                  |
|---------------------------|---------------|------------------------------------------------------------------|
| Normal                    | 0.9 - 1.2     | Risk of vascular foot ulcer is small                             |
| Definite vascular disease | 0.6 - 0.9     | Risk of vascular ulcer moderate, depending on other risk factors |
| Severe vascular disease   | Less than 0.6 | Risk of vascular foot ulcer very high                            |

1  
2  
3 **N.B.:** Ankle brachial index may not be able to be reliably calculated in some people with  
4 diabetes as the arteries in the ankles may be calcified.  
5

6 **Assess peripheral circulation** with thorough palpation of **pedal pulses** (dorsalis pedis  
7 and posterior tibial). If there are no palpable pulses, and calculate ankle brachial index or  
8 consider referral to a vascular specialist. **Absent pulses, calf claudication, absence of**  
9 **hair on the feet, altered temperature** (a cold foot) and **thin, bluish skin** are suggestive  
10 of **peripheral arterial disease**. A bounding, easily detected pulse in a **warm, dry foot** is  
11 suggestive of **autonomic neuropathy**, which causes abnormal arterio-venous shunting.  
12  
13  
14  
15  
16  
17  
18  
19  
20  
21  
22  
23  
24  
25  
26  
27  
28  
29  
30  
31  
32  
33  
34  
35  
36  
37  
38  
39  
40  
41  
42  
43  
44  
45  
46  
47  
48  
49  
50  
51  
52  
53  
54  
55  
56  
57  
58  
59  
60

## Screening for high risk patient: Foot mobility

### Limited Joint Mobility:

Progressive stiffening of collagen-containing tissues leads to thickening of the skin, loss of joint mobility, and potential fixed flexor deformity. Up to 30% of patients with diabetes may have limited joint mobility. Reduction in mobility of the ankle joint may cause increased plantar pressure when walking and be a major risk factor in the pathogenesis of diabetic foot ulcers (Fernando, Masson, Veves & Boulton, 1991; Zimny, Schatz & Pfohl, 2004). Achilles tendon contracture is a common cause of limited joint mobility causing increased pressure on the forefoot during ambulation (Armstrong, Lavery & Bushman, 1998; Mueller, Sinacore, Hastings, Strube & Johnson, 2004).

### Starting position:

For all of the measurements, the same starting position is used. Position the participant on the bed / plinth in long sitting, reclined to about 45 degrees. Place a pillow under upper part of the lower legs to flex the knee to 20-30° and lifting the heels off the surface of the bed / plinth. Ensure the patient is comfortable during the measurements. If it is not possible for the patient to get into the starting position then the measurements could be taken sitting, as long as the knee remains more than 20 degrees flexed and the heel is not directly resting on a support.

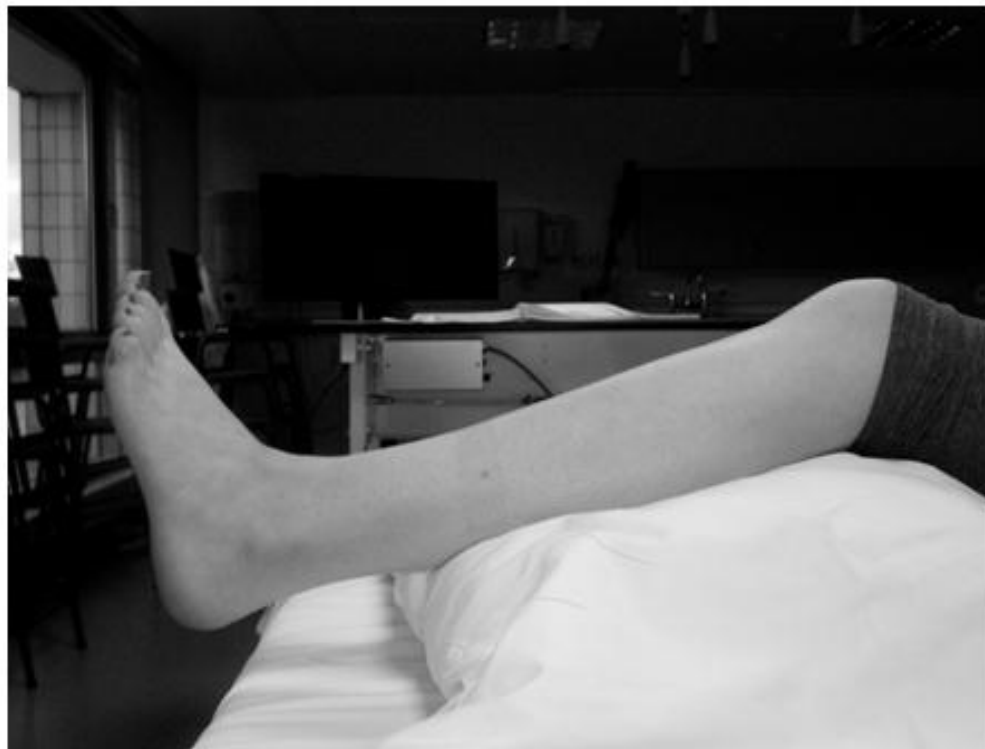

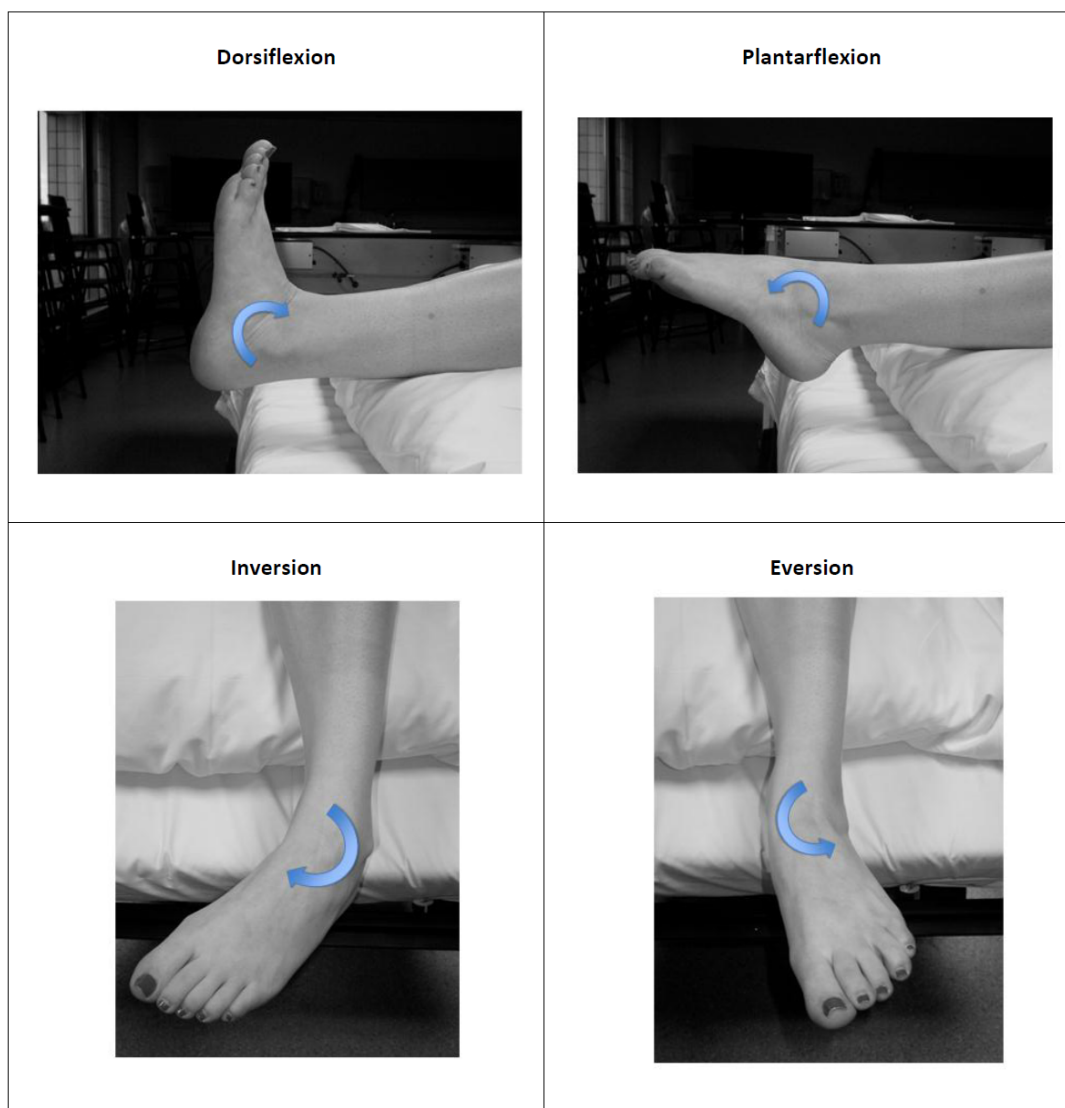

### Measuring the range of motion

For the purposes of the trial, measure the uninjured ankle (if appropriate) and then the injured ankle.

Ask the patient to move as far as comfortable, not into pain. Measure how far the patient can move the foot / ankle themselves, do not assist the movement.

### Ankle dorsiflexion and plantar flexion

Angles are measured from neutral (plantar grade), which is measured as 0°.

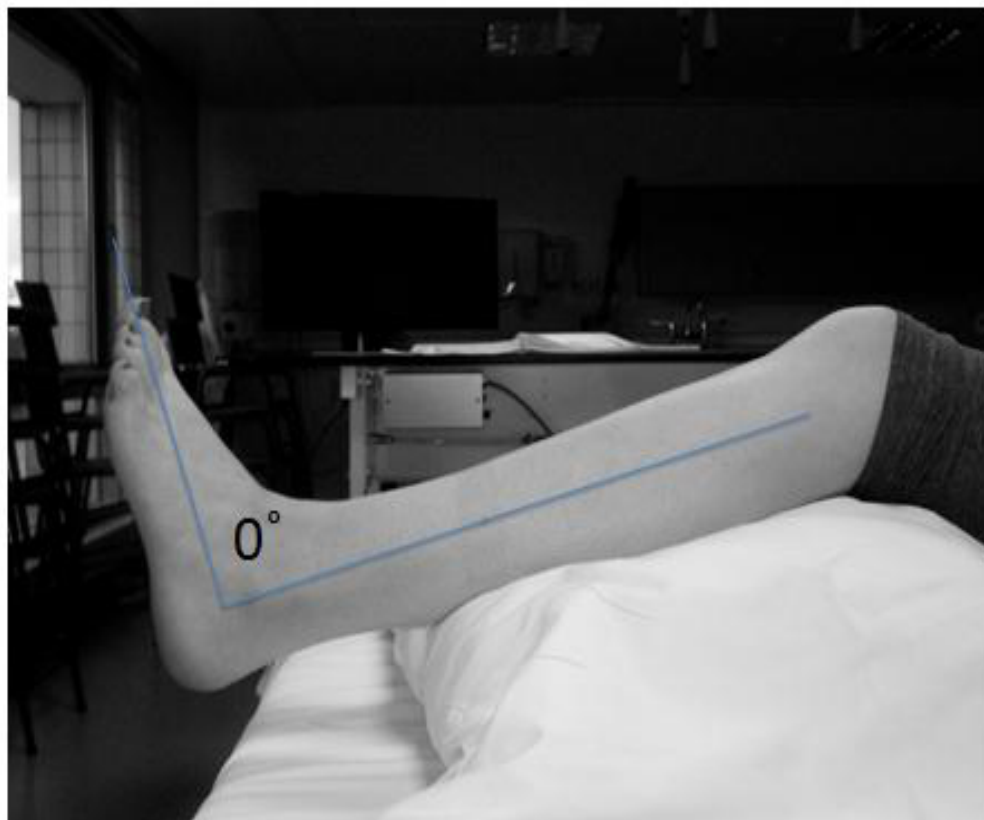**Goniometer axis:**

The axis of the goniometer is placed approximately 1.5cm inferior to the lateral malleolus.

**Stationary arm:**

Parallel to the longitudinal axis of the fibula, lining up with the fibula head.

**Moveable arm:**

Parallel to the longitudinal axis of the 5<sup>th</sup> metatarsal

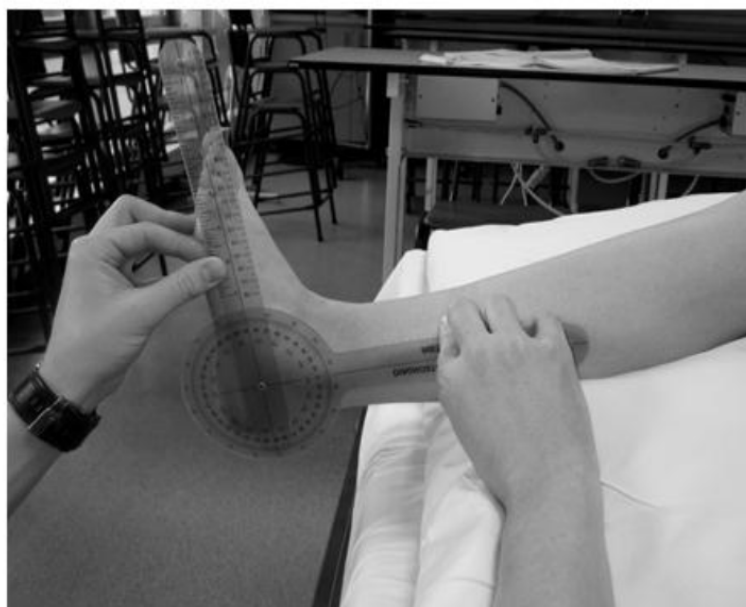

1  
2  
3 **Instructions:**

4  
5 **Dorsiflexion:** Ask the patient to pull their foot towards them  
6 (Normal range is typically 0-20°)  
7  
8

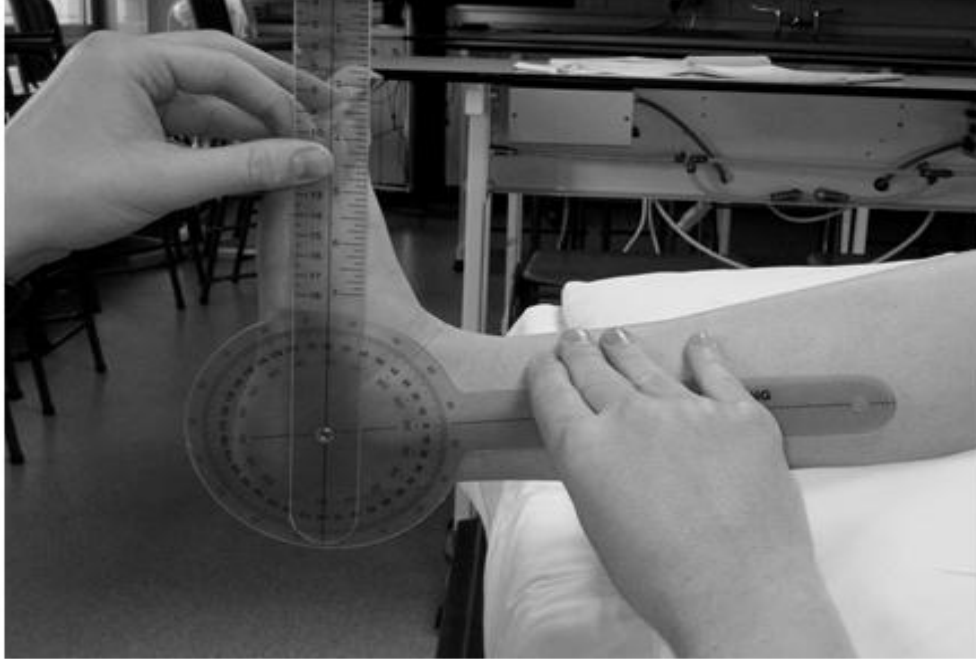

30  
31  
32 **Plantarflexion:** Ask the patient to point their foot away  
33 (normal range is typically 0-50°)  
34

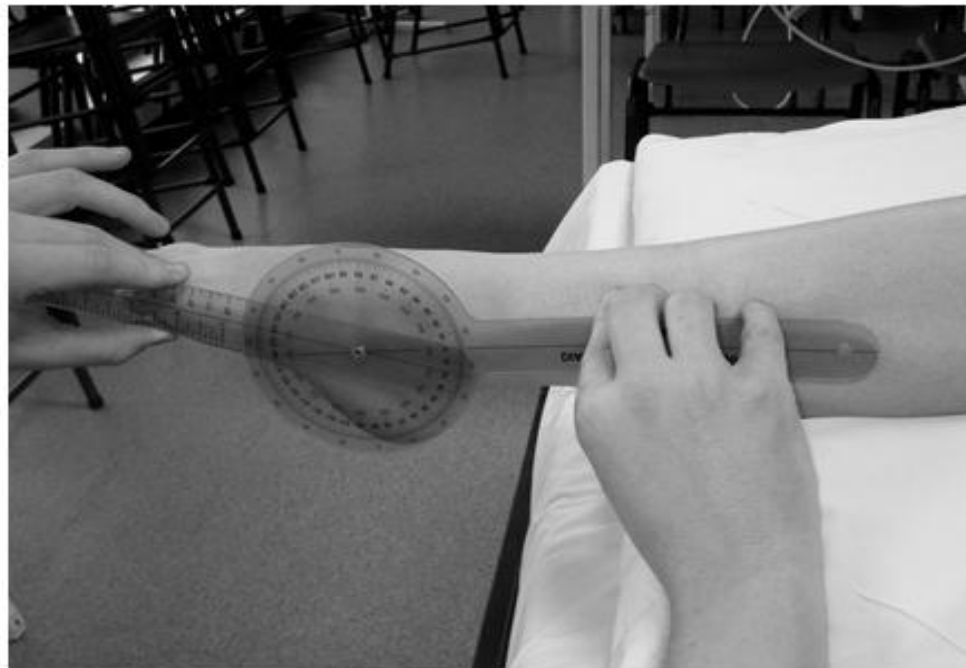

1  
2  
3 **Measure and record the angle between the movable and stationary arms in degrees.**

4  
5 **Ankle inversion and eversion**

6  
7 Angles are measured from neutral, which is measured as 0°.

8 Key bony landmarks that help to orientate the goniometer

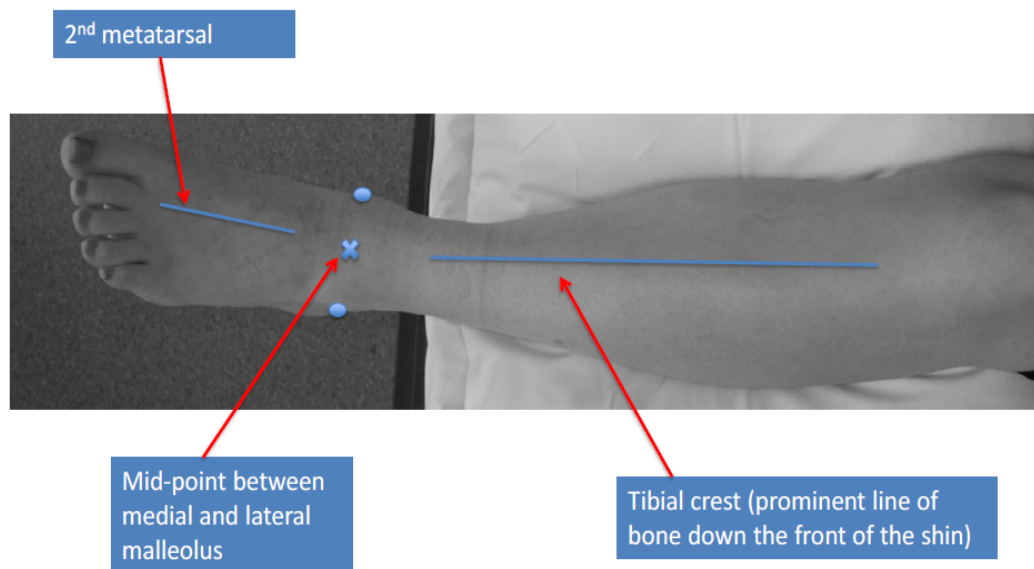

31 **Positioning and alignment of the goniometer:**

32 **Goniometer axis:**

33 The axis of the  
34 goniometer is placed on  
35 the front of the ankle at  
36 the mid-point between  
37 the medial and lateral  
38 malleoli.

39  
40  
41 **Stationary arm:**

42 Along the tibial crest  
43 (prominent line of bone  
44 down the front of the shin)

45  
46  
47 **Moveable arm:**

48 In line with the 2<sup>nd</sup>  
49 metatarsal (lining up  
50 with the base of the  
51 second toe).

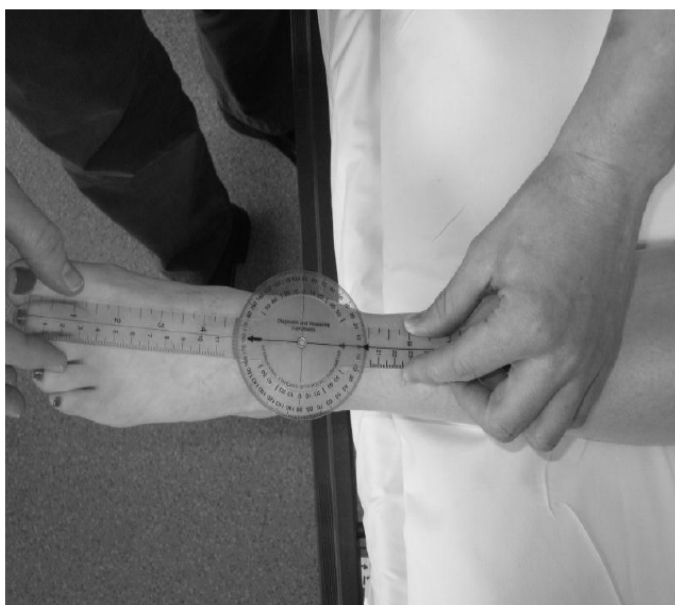

# Consent Form

1 **Dear Participant,**

2 **Purposive Selection**

3  
4 You have been purposively selected to be part of this thesis and this is why we would like to interview  
5 you. This thesis is being conducted by **Palash Chandra Banik**, a student of M.Phil in Non-  
6 communicable Diseases at Bangladesh Institute of Health Sciences (BIHS) under Bangabandhu Sheikh  
7 Mujib Medical University (BSMMU). This type of study is currently taking place in several countries  
8 around the world.

9  
10 **Title of Thesis**

11 The title of this thesis is **“Risk of foot ulcer and its determinants among Type 2 diabetic subjects”**.

12  
13 **Aim of the Thesis**

14 To determine diabetic patients at risk for foot ulceration through a multi-center hospital based study in  
15 Bangladesh

16  
17 **Data Collection Methods**

18 **Step 1-** Interview questions

19 **Step 2-** Physical examination & screening test (foot)

20 **Timeframe**

21 It is estimated that step 1 & 2 of this study will take approximately 30-40 minutes.

22  
23 **Confidentiality**

24 The information you provide is totally confidential and will not be disclosed to anyone. It will only be  
25 used for research purposes. Your name, address, and other personal information will be removed from  
26 the instrument, and only a code will be used to connect your name and your answers without  
27 identifying you.

28  
29 **Results**

30 The results of this thesis will be used to help plan strategies in reducing the risk factor that contribute to  
31 diabetic foot ulcer among the diabetic patients as well as chronic non-communicable diseases in  
32 Bangladesh.

33  
34 The results will be published in research publications, media briefings and reports and can be made  
35 available to you by local health workers.

36  
37 **Voluntary Participation**

38 Your participation is voluntary and you can withdraw from the study after having agreed to participate.  
39 You are free to refuse to answer any question that is asked in the questionnaire. If you have any  
40 questions about this study you may ask me or contact to the researcher [Palash Chandra Banik, cell:  
41 +8801710972498].

42  
43 **Consent to Participate**

44 Signing this consent indicates that you understand what will be expected of you and are willing to  
45 participate in this survey.

|                        |  |                |  |
|------------------------|--|----------------|--|
| 46 Read by Participant |  | 47 Interviewer |  |
| 48 Agreed              |  | 49 Refused     |  |

50 **Signatures**

51 I hereby provide INFORMED CONSENT to take part in Steps 1 and 2 of this Risk Factor Study.

52  
53  
54 **Name of the participant:**

**Witness:**

55  
56 **Sign or fingerprint**

**Sign or fingerprint**



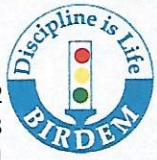

# BIRDEM

An Enterprise of the  
Diabetic Association of  
Bangladesh

## Bangladesh Institute of Research and Rehabilitation in Diabetes, Endocrine and Metabolic Disorders

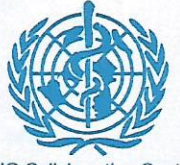

WHO Collaborating Centre  
for Prevention and Control  
of Diabetes

Memo No: BADAS/BIO/EA/11/033

Date: 17.01.2011

To

**Palash Chandra Banik**  
**Student, MPhil in Noncommunicable Diseases (NCD)**  
**Department of Community Medicine (CM)**  
**Bangladesh Institute of Health Sciences (BIHS)**

***Subject: Ethical Clearance***

The Ethical Review Committee (ERC) of the Bangladesh Diabetic Association (BADAS) has the pleasure to accord ethical clearance to your Protocol "**Risk of foot ulcer and its determinants among type 2 diabetic subjects in Bangladesh**" subject to the condition that the guidelines must be followed carefully.

- The Ethical Review Committee approves this study from an ethical point of view upon the addressing by the researchers of the concerns as raised by the ERC affiliates.
- Approval is given for three years. Projects, which have not commenced within two years of original approval, must be re-submitted to ERC. You must inform ERC when the research has been completed.
- Any serious adverse events or significant change which occurs in connection with this study and/or which may alter its ethical considerations must be reported immediately to the ERC.
- Approval is given on the understanding that the 'Guidelines for Ethical Review' are adhered to.

(Prof. Tofail Ahmed, PhD)

Chairman  
Ethical Review Committee

# Reporting checklist for cross sectional study.

Based on the STROBE cross sectional guidelines.

## Instructions to authors

Complete this checklist by entering the page numbers from your manuscript where readers will find each of the items listed below.

Your article may not currently address all the items on the checklist. Please modify your text to include the missing information. If you are certain that an item does not apply, please write "n/a" and provide a short explanation.

Upload your completed checklist as an extra file when you submit to a journal.

In your methods section, say that you used the STROBE cross sectional reporting guidelines, and cite them as:

von Elm E, Altman DG, Egger M, Pocock SJ, Gøtzsche PC, Vandenbroucke JP. The Strengthening the Reporting of Observational Studies in Epidemiology (STROBE) Statement: guidelines for reporting observational studies.

|                           | Reporting Item                                                                                                      | Page Number                  |
|---------------------------|---------------------------------------------------------------------------------------------------------------------|------------------------------|
| <b>Title and abstract</b> |                                                                                                                     |                              |
| Title                     | <a href="#">#1a</a> Indicate the study's design with a commonly used term in the title or the abstract              | Page-1, Line Number-1        |
| Abstract                  | <a href="#">#1b</a> Provide in the abstract an informative and balanced summary of what was done and what was found | Page-2,3, Line Number-25-54  |
| <b>Introduction</b>       |                                                                                                                     |                              |
| Background / rationale    | <a href="#">#2</a> Explain the scientific background and rationale for the investigation being reported             | Page-4-6, Line Number-75-136 |
| Objectives                | <a href="#">#3</a> State specific objectives, including any prespecified hypotheses                                 | Page-6, Line Number-135-136  |
| <b>Methods</b>            |                                                                                                                     |                              |

|    |                            |                      |                                                                                                                                                                                                                                                                      |                               |
|----|----------------------------|----------------------|----------------------------------------------------------------------------------------------------------------------------------------------------------------------------------------------------------------------------------------------------------------------|-------------------------------|
| 1  | Study design               | <a href="#">#4</a>   | Present key elements of study design early in the paper                                                                                                                                                                                                              | Page-6, Line Number-139       |
| 2  |                            |                      |                                                                                                                                                                                                                                                                      |                               |
| 3  |                            |                      |                                                                                                                                                                                                                                                                      |                               |
| 4  | Setting                    | <a href="#">#5</a>   | Describe the setting, locations, and relevant dates, including periods of recruitment, exposure, follow-up, and data collection                                                                                                                                      | Page-6, Line Number-139-142   |
| 5  |                            |                      |                                                                                                                                                                                                                                                                      |                               |
| 6  |                            |                      |                                                                                                                                                                                                                                                                      |                               |
| 7  |                            |                      |                                                                                                                                                                                                                                                                      |                               |
| 8  |                            |                      |                                                                                                                                                                                                                                                                      |                               |
| 9  |                            |                      |                                                                                                                                                                                                                                                                      |                               |
| 10 | Eligibility criteria       | <a href="#">#6a</a>  | Give the eligibility criteria, and the sources and methods of selection of participants.                                                                                                                                                                             | Page-6, Line Number-143-147   |
| 11 |                            |                      |                                                                                                                                                                                                                                                                      |                               |
| 12 |                            |                      |                                                                                                                                                                                                                                                                      |                               |
| 13 |                            |                      |                                                                                                                                                                                                                                                                      |                               |
| 14 |                            | <a href="#">#7</a>   | Clearly define all outcomes, exposures, predictors, potential confounders, and effect modifiers. Give diagnostic criteria, if applicable                                                                                                                             | Page-6-8, Line Number-148-202 |
| 15 |                            |                      |                                                                                                                                                                                                                                                                      |                               |
| 16 |                            |                      |                                                                                                                                                                                                                                                                      |                               |
| 17 |                            |                      |                                                                                                                                                                                                                                                                      |                               |
| 18 |                            |                      |                                                                                                                                                                                                                                                                      |                               |
| 19 | Data sources / measurement | <a href="#">#8</a>   | For each variable of interest give sources of data and details of methods of assessment (measurement). Describe comparability of assessment methods if there is more than one group. Give information separately for for exposed and unexposed groups if applicable. | Page-7, Line Number-180-202   |
| 20 |                            |                      |                                                                                                                                                                                                                                                                      |                               |
| 21 |                            |                      |                                                                                                                                                                                                                                                                      |                               |
| 22 |                            |                      |                                                                                                                                                                                                                                                                      |                               |
| 23 |                            |                      |                                                                                                                                                                                                                                                                      |                               |
| 24 |                            |                      |                                                                                                                                                                                                                                                                      |                               |
| 25 |                            |                      |                                                                                                                                                                                                                                                                      |                               |
| 26 |                            |                      |                                                                                                                                                                                                                                                                      |                               |
| 27 |                            |                      |                                                                                                                                                                                                                                                                      |                               |
| 28 |                            |                      |                                                                                                                                                                                                                                                                      |                               |
| 29 | Bias                       | <a href="#">#9</a>   | Describe any efforts to address potential sources of bias                                                                                                                                                                                                            | Page-8, Line Number-203-226   |
| 30 |                            |                      |                                                                                                                                                                                                                                                                      |                               |
| 31 |                            |                      |                                                                                                                                                                                                                                                                      |                               |
| 32 |                            |                      |                                                                                                                                                                                                                                                                      |                               |
| 33 | Study size                 | <a href="#">#10</a>  | Explain how the study size was arrived at                                                                                                                                                                                                                            | Page-6, Line Number-139-140   |
| 34 |                            |                      |                                                                                                                                                                                                                                                                      |                               |
| 35 |                            |                      |                                                                                                                                                                                                                                                                      |                               |
| 36 | Quantitative variables     | <a href="#">#11</a>  | Explain how quantitative variables were handled in the analyses. If applicable, describe which groupings were chosen, and why                                                                                                                                        | Page-9, Line Number-239-258   |
| 37 |                            |                      |                                                                                                                                                                                                                                                                      |                               |
| 38 |                            |                      |                                                                                                                                                                                                                                                                      |                               |
| 39 |                            |                      |                                                                                                                                                                                                                                                                      |                               |
| 40 |                            |                      |                                                                                                                                                                                                                                                                      |                               |
| 41 | Statistical methods        | <a href="#">#12a</a> | Describe all statistical methods, including those used to control for confounding                                                                                                                                                                                    | Page-9, Line Number-239-258   |
| 42 |                            |                      |                                                                                                                                                                                                                                                                      |                               |
| 43 |                            |                      |                                                                                                                                                                                                                                                                      |                               |
| 44 |                            |                      |                                                                                                                                                                                                                                                                      |                               |
| 45 | Statistical methods        | <a href="#">#12b</a> | Describe any methods used to examine subgroups and interactions                                                                                                                                                                                                      | n/a                           |
| 46 |                            |                      |                                                                                                                                                                                                                                                                      |                               |
| 47 |                            |                      |                                                                                                                                                                                                                                                                      |                               |
| 48 |                            |                      |                                                                                                                                                                                                                                                                      |                               |
| 49 | Statistical methods        | <a href="#">#12c</a> | Explain how missing data were addressed                                                                                                                                                                                                                              | n/a                           |
| 50 |                            |                      |                                                                                                                                                                                                                                                                      |                               |
| 51 |                            |                      |                                                                                                                                                                                                                                                                      |                               |
| 52 |                            |                      |                                                                                                                                                                                                                                                                      |                               |
| 53 | Statistical methods        | <a href="#">#12d</a> | If applicable, describe analytical methods taking account of sampling strategy                                                                                                                                                                                       | n/a                           |
| 54 |                            |                      |                                                                                                                                                                                                                                                                      |                               |
| 55 |                            |                      |                                                                                                                                                                                                                                                                      |                               |
| 56 |                            |                      |                                                                                                                                                                                                                                                                      |                               |
| 57 | Statistical methods        | <a href="#">#12e</a> | Describe any sensitivity analyses                                                                                                                                                                                                                                    | n/a                           |
| 58 |                            |                      |                                                                                                                                                                                                                                                                      |                               |
| 59 |                            |                      |                                                                                                                                                                                                                                                                      |                               |
| 60 |                            |                      |                                                                                                                                                                                                                                                                      |                               |

## Results

|                  |                      |                                                                                                                                                                                                                                                                                |                                                                         |
|------------------|----------------------|--------------------------------------------------------------------------------------------------------------------------------------------------------------------------------------------------------------------------------------------------------------------------------|-------------------------------------------------------------------------|
| Participants     | <a href="#">#13a</a> | Report numbers of individuals at each stage of study—eg numbers potentially eligible, examined for eligibility, confirmed eligible, included in the study, completing follow-up, and analysed. Give information separately for for exposed and unexposed groups if applicable. | n/a                                                                     |
| Participants     | <a href="#">#13b</a> | Give reasons for non-participation at each stage                                                                                                                                                                                                                               | Some of the participants were not participate as they had limited time. |
| Participants     | <a href="#">#13c</a> | Consider use of a flow diagram                                                                                                                                                                                                                                                 | n/a                                                                     |
| Descriptive data | <a href="#">#14a</a> | Give characteristics of study participants (eg demographic, clinical, social) and information on exposures and potential confounders. Give information separately for exposed and unexposed groups if applicable.                                                              | Page-10, Line Number-242-244                                            |
| Descriptive data | <a href="#">#14b</a> | Indicate number of participants with missing data for each variable of interest                                                                                                                                                                                                | n/a                                                                     |
| Outcome data     | <a href="#">#15</a>  | Report numbers of outcome events or summary measures. Give information separately for exposed and unexposed groups if applicable.                                                                                                                                              | n/a                                                                     |
| Main results     | <a href="#">#16a</a> | Give unadjusted estimates and, if applicable, confounder-adjusted estimates and their precision (eg, 95% confidence interval). Make clear which confounders were adjusted for and why they were included                                                                       | Page-13-16, Line Number- 292-308                                        |
| Main results     | <a href="#">#16b</a> | Report category boundaries when continuous variables were categorized                                                                                                                                                                                                          | Page-10-16, Line Number- 259-308                                        |
| Main results     | <a href="#">#16c</a> | If relevant, consider translating estimates of relative risk into absolute risk for a meaningful time period                                                                                                                                                                   | n/a                                                                     |

|    |                    |                     |                                                                                                                                                                  |                                  |
|----|--------------------|---------------------|------------------------------------------------------------------------------------------------------------------------------------------------------------------|----------------------------------|
| 1  | Other analyses     | <a href="#">#17</a> | Report other analyses done—e.g., analyses of subgroups and interactions, and sensitivity analyses                                                                | n/a                              |
| 2  |                    |                     |                                                                                                                                                                  |                                  |
| 3  |                    |                     |                                                                                                                                                                  |                                  |
| 4  |                    |                     |                                                                                                                                                                  |                                  |
| 5  |                    |                     |                                                                                                                                                                  |                                  |
| 6  | <b>Discussion</b>  |                     |                                                                                                                                                                  |                                  |
| 7  |                    |                     |                                                                                                                                                                  |                                  |
| 8  |                    |                     |                                                                                                                                                                  |                                  |
| 9  | Key results        | <a href="#">#18</a> | Summarise key results with reference to study objectives                                                                                                         | Page-16-20, Line Number- 309-430 |
| 10 |                    |                     |                                                                                                                                                                  |                                  |
| 11 |                    |                     |                                                                                                                                                                  |                                  |
| 12 | Limitations        | <a href="#">#19</a> | Discuss limitations of the study, taking into account sources of potential bias or imprecision. Discuss both direction and magnitude of any potential bias.      | Page-20-21, Line Number-431-442  |
| 13 |                    |                     |                                                                                                                                                                  |                                  |
| 14 |                    |                     |                                                                                                                                                                  |                                  |
| 15 |                    |                     |                                                                                                                                                                  |                                  |
| 16 |                    |                     |                                                                                                                                                                  |                                  |
| 17 |                    |                     |                                                                                                                                                                  |                                  |
| 18 | Interpretation     | <a href="#">#20</a> | Give a cautious overall interpretation considering objectives, limitations, multiplicity of analyses, results from similar studies, and other relevant evidence. | Page-21, Line Number-443 to 461  |
| 19 |                    |                     |                                                                                                                                                                  |                                  |
| 20 |                    |                     |                                                                                                                                                                  |                                  |
| 21 |                    |                     |                                                                                                                                                                  |                                  |
| 22 |                    |                     |                                                                                                                                                                  |                                  |
| 23 |                    |                     |                                                                                                                                                                  |                                  |
| 24 | Generalisability   | <a href="#">#21</a> | Discuss the generalisability (external validity) of the study results                                                                                            | Page-20, Line Number-432-442     |
| 25 |                    |                     |                                                                                                                                                                  |                                  |
| 26 |                    |                     |                                                                                                                                                                  |                                  |
| 27 |                    |                     |                                                                                                                                                                  |                                  |
| 28 | <b>Other</b>       |                     |                                                                                                                                                                  |                                  |
| 29 | <b>Information</b> |                     |                                                                                                                                                                  |                                  |
| 30 |                    |                     |                                                                                                                                                                  |                                  |
| 31 |                    |                     |                                                                                                                                                                  |                                  |
| 32 | Funding            | <a href="#">#22</a> | Give the source of funding and the role of the funders for the present study and, if applicable, for the original study on which the present article is based    | Page-21, Line Number-462-465     |
| 33 |                    |                     |                                                                                                                                                                  |                                  |
| 34 |                    |                     |                                                                                                                                                                  |                                  |
| 35 |                    |                     |                                                                                                                                                                  |                                  |
| 36 |                    |                     |                                                                                                                                                                  |                                  |
| 37 |                    |                     |                                                                                                                                                                  |                                  |
| 38 |                    |                     |                                                                                                                                                                  |                                  |

39 None The STROBE checklist is distributed under the terms of the Creative Commons Attribution  
 40 License CC-BY. This checklist can be completed online using <https://www.goodreports.org/>, a tool  
 41 made by the [EQUATOR Network](#) in collaboration with [Penelope.ai](#)  
 42  
 43  
 44  
 45  
 46  
 47  
 48  
 49  
 50  
 51  
 52  
 53  
 54  
 55  
 56  
 57  
 58  
 59  
 60

|    | id | Center | Q1_age | Q1a_sex | rec_area | rec_edu | rec_occ | rec_marr | Q8_fam_inc |
|----|----|--------|--------|---------|----------|---------|---------|----------|------------|
| 1  |    |        |        |         |          |         |         |          |            |
| 2  |    |        |        |         |          |         |         |          |            |
| 3  | 1  | 1      | 70     | 2       | 1        | 2       | 2       | 1        | 20000      |
| 4  | 2  | 1      | 55     | 2       | 2        | 3       | 3       | 1        | 5000       |
| 5  | 3  | 1      | 35     | 2       | 1        | 4       | 1       | 1        | 15000      |
| 6  | 4  | 1      | 57     | 2       | 1        | 3       | 3       | 1        | 35000      |
| 7  | 5  | 1      | 57     | 2       | 1        | 3       | 3       | 1        | 10000      |
| 8  | 6  | 1      | 50     | 2       | 1        | 2       | 3       | 1        | 20000      |
| 9  | 7  | 1      | 56     | 2       | 1        | 1       | 3       | 1        | 40000      |
| 10 | 8  | 1      | 55     | 2       | 1        | 2       | 3       | 1        | 50000      |
| 11 | 9  | 1      | 70     | 2       | 1        | 2       | 3       | 1        | 20000      |
| 12 | 10 | 1      | 75     | 2       | 1        | 2       | 3       | 1        | 50000      |
| 13 | 11 | 1      | 65     | 2       | 1        | 2       | 3       | 1        | 20000      |
| 14 | 12 | 1      | 60     | 2       | 1        | 2       | 3       | 1        | 10000      |
| 15 | 13 | 1      | 45     | 1       | 1        | 4       | 1       | 1        | 30000      |
| 16 | 14 | 1      | 58     | 2       | 1        | 3       | 3       | 1        | 60000      |
| 17 | 15 | 1      | 47     | 2       | 2        | 1       | 3       | 1        | 6000       |
| 18 | 16 | 1      | 62     | 1       | 1        | 4       | 1       | 1        | 100000     |
| 19 | 17 | 1      | 45     | 1       | 1        | 4       | 1       | 1        | 15000      |
| 20 | 18 | 1      | 34     | 1       | 2        | 2       | 4       | 1        | 6000       |
| 21 | 19 | 1      | 68     | 1       | 1        | 3       | 1       | 1        | 65000      |
| 22 | 20 | 1      | 58     | 1       | 1        | 4       | 2       | 1        | 100000     |
| 23 | 21 | 1      | 60     | 1       | 1        | 2       | 4       | 1        | 10000      |
| 24 | 22 | 1      | 51     | 2       | 2        | 2       | 3       | 1        | 6000       |
| 25 | 23 | 1      | 53     | 1       | 1        | 3       | 2       | 1        | 20000      |
| 26 | 24 | 1      | 70     | 1       | 1        | 4       | 1       | 1        | 35000      |
| 27 | 25 | 1      | 70     | 1       | 1        | 2       | 1       | 1        | 3000       |
| 28 | 26 | 1      | 27     | 1       | 1        | 4       | 1       | 1        | 8000       |
| 29 | 27 | 1      | 60     | 1       | 1        | 2       | 1       | 1        | 15000      |
| 30 | 28 | 1      | 73     | 1       | 1        | 4       | 1       | 1        | 30000      |
| 31 | 29 | 1      | 55     | 1       | 2        | 2       | 1       | 1        | 15000      |
| 32 | 30 | 1      | 55     | 1       | 1        | 4       | 2       | 1        | 15000      |
| 33 | 31 | 1      | 44     | 1       | 1        | 2       | 2       | 1        | 20000      |
| 34 | 32 | 1      | 50     | 1       | 1        | 4       | 4       | 1        | 30000      |
| 35 | 33 | 1      | 67     | 1       | 1        | 4       | 1       | 1        | 15000      |
| 36 | 34 | 1      | 77     | 1       | 1        | 2       | 4       | 1        | 30000      |
| 37 | 35 | 1      | 44     | 1       | 1        | 4       | 1       | 1        | 20000      |
| 38 | 36 | 1      | 40     | 1       | 2        | 4       | 1       | 1        | 4000       |
| 39 | 37 | 1      | 80     | 1       | 1        | 4       | 1       | 1        | 500000     |
| 40 | 38 | 1      | 63     | 1       | 1        | 2       | 1       | 1        | 22000      |
| 41 | 39 | 1      | 50     | 1       | 1        | 3       | 2       | 1        | 30000      |
| 42 | 40 | 1      | 50     | 1       | 1        | 4       | 1       | 1        | 40000      |
| 43 | 41 | 1      | 50     | 1       | 1        | 4       | 1       | 1        | 750000     |
| 44 | 42 | 1      | 80     | 1       | 1        | 3       | 1       | 1        | 6000       |
| 45 | 43 | 1      | 50     | 1       | 2        | 3       | 1       | 1        | 2000       |
| 46 | 44 | 1      | 48     | 1       | 1        | 4       | 1       | 1        | 7000       |
| 47 | 45 | 1      | 72     | 1       | 1        | 3       | 1       | 1        | 30000      |
| 48 | 46 | 1      | 58     | 1       | 1        | 2       | 2       | 1        | 90000      |
| 49 | 47 | 1      | 59     | 1       | 1        | 3       | 1       | 1        | 35000      |
| 50 | 48 | 1      | 65     | 1       | 1        | 4       | 1       | 1        | 35000      |
| 51 | 49 | 1      | 54     | 1       | 1        | 2       | 4       | 1        | 50000      |

|    |    |   |    |   |   |   |   |   |        |
|----|----|---|----|---|---|---|---|---|--------|
| 1  |    |   |    |   |   |   |   |   |        |
| 2  | 50 | 1 | 58 | 1 | 1 | 2 | 4 | 1 | 20000  |
| 3  | 51 | 1 | 67 | 1 | 1 | 4 | 1 | 1 | 40000  |
| 4  | 52 | 1 | 50 | 1 | 1 | 4 | 1 | 1 | 20000  |
| 5  | 53 | 1 | 65 | 1 | 1 | 4 | 2 | 1 | 40000  |
| 6  | 54 | 1 | 78 | 1 | 1 | 4 | 1 | 1 | 20000  |
| 7  | 55 | 1 | 55 | 1 | 1 | 4 | 1 | 1 | 70000  |
| 8  | 56 | 1 | 41 | 1 | 1 | 4 | 4 | 1 | 90000  |
| 9  | 57 | 1 | 75 | 1 | 1 | 4 | 2 | 1 | 5000   |
| 10 | 58 | 1 | 76 | 1 | 1 | 4 | 1 | 1 | 40000  |
| 11 | 59 | 1 | 52 | 1 | 1 | 4 | 1 | 1 | 15000  |
| 12 | 60 | 1 | 51 | 1 | 2 | 3 | 2 | 1 | 12000  |
| 13 | 61 | 1 | 63 | 1 | 1 | 2 | 1 | 1 | 50000  |
| 14 | 62 | 1 | 68 | 1 | 1 | 4 | 1 | 1 | 65000  |
| 15 | 63 | 1 | 58 | 1 | 1 | 2 | 2 | 1 | 100000 |
| 16 | 64 | 1 | 62 | 1 | 1 | 4 | 1 | 1 | 60000  |
| 17 | 65 | 1 | 50 | 1 | 1 | 3 | 1 | 1 | 10000  |
| 18 | 66 | 1 | 65 | 1 | 1 | 3 | 1 | 1 | 20000  |
| 19 | 67 | 1 | 61 | 1 | 1 | 3 | 4 | 1 | 100000 |
| 20 | 68 | 1 | 66 | 1 | 1 | 2 | 2 | 1 | 35000  |
| 21 | 69 | 1 | 40 | 1 | 1 | 3 | 2 | 1 | 7000   |
| 22 | 70 | 1 | 48 | 1 | 1 | 4 | 4 | 1 | 20000  |
| 23 | 71 | 1 | 37 | 2 | 2 | 2 | 3 | 1 | 5000   |
| 24 | 72 | 1 | 42 | 2 | 1 | 2 | 3 | 1 | 30000  |
| 25 | 73 | 1 | 63 | 2 | 1 | 2 | 3 | 1 | 30000  |
| 26 | 74 | 1 | 56 | 2 | 1 | 2 | 3 | 1 | 35000  |
| 27 | 75 | 1 | 70 | 2 | 1 | 3 | 3 | 1 | 50000  |
| 28 | 76 | 1 | 50 | 2 | 2 | 1 | 3 | 1 | 30000  |
| 29 | 77 | 1 | 71 | 2 | 1 | 2 | 3 | 1 | 30000  |
| 30 | 78 | 1 | 70 | 2 | 1 | 2 | 3 | 1 | 20000  |
| 31 | 79 | 1 | 58 | 2 | 1 | 4 | 3 | 1 | 25000  |
| 32 | 80 | 1 | 70 | 1 | 1 | 2 | 3 | 1 | 30000  |
| 33 | 81 | 1 | 44 | 2 | 1 | 1 | 4 | 1 | 15000  |
| 34 | 82 | 1 | 55 | 2 | 1 | 4 | 1 | 1 | 10000  |
| 35 | 83 | 1 | 41 | 2 | 1 | 4 | 1 | 1 | 100000 |
| 36 | 84 | 1 | 52 | 2 | 1 | 2 | 3 | 1 | 20000  |
| 37 | 85 | 1 | 52 | 2 | 1 | 2 | 3 | 1 | 30000  |
| 38 | 86 | 1 | 55 | 2 | 1 | 4 | 1 | 1 | 5000   |
| 39 | 87 | 1 | 55 | 2 | 1 | 2 | 1 | 1 | 6000   |
| 40 | 88 | 1 | 50 | 2 | 1 | 3 | 3 | 1 | 100000 |
| 41 | 89 | 1 | 59 | 2 | 1 | 3 | 3 | 1 | 60000  |
| 42 | 90 | 1 | 52 | 2 | 2 | 2 | 3 | 1 | 20000  |
| 43 | 91 | 1 | 42 | 2 | 2 | 3 | 1 | 1 | 5000   |
| 44 | 92 | 1 | 56 | 2 | 1 | 2 | 3 | 1 | 12000  |
| 45 | 93 | 1 | 50 | 2 | 1 | 4 | 1 | 1 | 50000  |
| 46 | 94 | 1 | 33 | 2 | 1 | 3 | 3 | 1 | 40000  |
| 47 | 95 | 1 | 52 | 2 | 1 | 2 | 3 | 1 | 70000  |
| 48 | 96 | 1 | 55 | 2 | 1 | 2 | 3 | 1 | 25000  |
| 49 | 97 | 1 | 45 | 2 | 2 | 2 | 3 | 1 | 50000  |
| 50 | 98 | 1 | 65 | 2 | 1 | 2 | 3 | 1 | 40000  |
| 51 | 99 | 1 | 58 | 2 | 1 | 3 | 3 | 1 | 25000  |

|    |     |   |    |   |   |   |   |   |        |
|----|-----|---|----|---|---|---|---|---|--------|
| 1  |     |   |    |   |   |   |   |   |        |
| 2  | 100 | 1 | 45 | 2 | 1 | 3 | 3 | 1 | 15000  |
| 3  | 101 | 1 | 57 | 2 | 1 | 2 | 3 | 1 | 70000  |
| 4  | 102 | 1 | 30 | 2 | 1 | 2 | 3 | 1 | 15000  |
| 5  | 103 | 1 | 52 | 2 | 1 | 1 | 3 | 1 | 10000  |
| 6  | 104 | 1 | 47 | 2 | 1 | 2 | 3 | 1 | 8000   |
| 8  | 105 | 1 | 68 | 2 | 1 | 1 | 4 | 1 | 30000  |
| 9  | 106 | 1 | 42 | 2 | 2 | 3 | 3 | 1 | 10000  |
| 10 | 107 | 1 | 68 | 2 | 1 | 4 | 3 | 1 | 40000  |
| 11 | 108 | 1 | 43 | 2 | 1 | 2 | 3 | 1 | 15000  |
| 12 | 109 | 1 | 65 | 2 | 2 | 1 | 3 | 1 | 10000  |
| 14 | 110 | 1 | 71 | 2 | 1 | 3 | 1 | 1 | 20000  |
| 15 | 111 | 1 | 50 | 2 | 1 | 2 | 3 | 1 | 40000  |
| 16 | 112 | 1 | 70 | 2 | 1 | 2 | 3 | 1 | 10000  |
| 17 | 113 | 1 | 65 | 2 | 2 | 1 | 3 | 1 | 7000   |
| 18 | 114 | 1 | 35 | 2 | 1 | 1 | 3 | 1 | 40000  |
| 20 | 115 | 1 | 32 | 2 | 1 | 2 | 3 | 1 | 60000  |
| 21 | 116 | 1 | 45 | 2 | 1 | 1 | 3 | 1 | 40000  |
| 22 | 117 | 1 | 65 | 2 | 1 | 3 | 3 | 1 | 30000  |
| 23 | 118 | 1 | 64 | 2 | 1 | 2 | 3 | 1 | 30000  |
| 24 | 119 | 1 | 60 | 2 | 1 | 3 | 3 | 1 | 30000  |
| 26 | 120 | 1 | 52 | 2 | 1 | 2 | 3 | 1 | 30000  |
| 27 | 121 | 1 | 45 | 2 | 1 | 2 | 3 | 1 | 10000  |
| 28 | 122 | 1 | 45 | 2 | 1 | 2 | 3 | 1 | 25000  |
| 29 | 123 | 1 | 40 | 2 | 1 | 2 | 3 | 1 | 20000  |
| 31 | 124 | 1 | 32 | 2 | 1 | 4 | 1 | 1 | 22000  |
| 32 | 125 | 1 | 75 | 2 | 1 | 2 | 3 | 1 | 20000  |
| 33 | 126 | 1 | 50 | 2 | 1 | 2 | 3 | 1 | 20000  |
| 34 | 127 | 1 | 68 | 2 | 2 | 2 | 3 | 1 | 30000  |
| 35 | 128 | 1 | 60 | 2 | 1 | 2 | 3 | 1 | 100000 |
| 37 | 129 | 1 | 50 | 2 | 1 | 2 | 3 | 1 | 80000  |
| 38 | 130 | 1 | 45 | 2 | 1 | 3 | 3 | 1 | 5000   |
| 39 | 131 | 1 | 61 | 2 | 1 | 2 | 3 | 1 | 12000  |
| 40 | 132 | 1 | 55 | 2 | 1 | 3 | 3 | 1 | 10000  |
| 41 | 133 | 1 | 50 | 2 | 1 | 3 | 3 | 1 | 5000   |
| 43 | 134 | 1 | 45 | 2 | 1 | 2 | 3 | 1 | 25000  |
| 44 | 135 | 1 | 45 | 2 | 1 | 2 | 3 | 1 | 20000  |
| 45 | 136 | 1 | 52 | 2 | 1 | 3 | 3 | 1 | 30000  |
| 46 | 137 | 1 | 62 | 2 | 1 | 2 | 3 | 1 | 50000  |
| 47 | 138 | 1 | 62 | 2 | 1 | 2 | 3 | 1 | 30000  |
| 49 | 139 | 1 | 82 | 2 | 1 | 2 | 3 | 1 | 100000 |
| 50 | 140 | 1 | 60 | 2 | 1 | 3 | 3 | 1 | 50000  |
| 51 | 141 | 1 | 59 | 2 | 1 | 3 | 3 | 1 | 25000  |
| 52 | 142 | 1 | 57 | 2 | 1 | 2 | 3 | 1 | 28000  |
| 53 | 143 | 1 | 60 | 2 | 1 | 2 | 3 | 1 | 20000  |
| 54 | 144 | 1 | 55 | 2 | 1 | 3 | 3 | 1 | 8000   |
| 56 | 145 | 1 | 50 | 2 | 1 | 3 | 3 | 1 | 30000  |
| 57 | 146 | 1 | 50 | 2 | 1 | 3 | 3 | 1 | 15000  |
| 58 | 147 | 1 | 55 | 2 | 1 | 4 | 1 | 1 | 25000  |
| 59 | 148 | 1 | 75 | 2 | 1 | 4 | 4 | 1 | 8000   |
| 60 | 149 | 1 | 50 | 2 | 1 | 2 | 3 | 1 | 30000  |



|    |     |   |    |   |   |   |   |   |        |
|----|-----|---|----|---|---|---|---|---|--------|
| 1  |     |   |    |   |   |   |   |   |        |
| 2  | 150 | 1 | 44 | 2 | 1 | 3 | 3 | 1 | 25000  |
| 3  | 151 | 1 | 37 | 2 | 1 | 2 | 3 | 1 | 15000  |
| 4  | 152 | 1 | 40 | 2 | 1 | 1 | 3 | 1 | 7000   |
| 5  | 153 | 1 | 85 | 2 | 1 | 2 | 3 | 1 | 100000 |
| 6  | 154 | 1 | 43 | 2 | 1 | 3 | 4 | 1 | 13000  |
| 7  | 155 | 1 | 65 | 2 | 1 | 2 | 3 | 1 | 30000  |
| 8  | 156 | 1 | 63 | 2 | 1 | 2 | 3 | 1 | 25000  |
| 9  | 157 | 1 | 55 | 2 | 1 | 3 | 3 | 1 | 30000  |
| 10 | 158 | 1 | 53 | 2 | 1 | 2 | 3 | 1 | 20000  |
| 11 | 159 | 1 | 62 | 2 | 1 | 2 | 3 | 1 | 15000  |
| 12 | 160 | 1 | 65 | 2 | 1 | 4 | 3 | 1 | 7000   |
| 13 | 161 | 1 | 34 | 2 | 1 | 4 | 3 | 1 | 20000  |
| 14 | 162 | 1 | 63 | 2 | 1 | 3 | 3 | 1 | 60000  |
| 15 | 163 | 1 | 60 | 2 | 1 | 2 | 3 | 1 | 30000  |
| 16 | 164 | 1 | 43 | 2 | 1 | 2 | 3 | 1 | 60000  |
| 17 | 165 | 1 | 65 | 2 | 1 | 2 | 3 | 1 | 40000  |
| 18 | 166 | 1 | 56 | 2 | 1 | 4 | 3 | 1 | 20000  |
| 19 | 167 | 1 | 40 | 2 | 1 | 2 | 3 | 1 | 50000  |
| 20 | 168 | 1 | 40 | 2 | 1 | 4 | 3 | 1 | 20000  |
| 21 | 169 | 1 | 55 | 2 | 1 | 2 | 3 | 1 | 5000   |
| 22 | 170 | 1 | 66 | 2 | 1 | 3 | 3 | 1 | 30000  |
| 23 | 171 | 1 | 70 | 2 | 1 | 4 | 3 | 1 | 50000  |
| 24 | 172 | 1 | 47 | 2 | 1 | 3 | 3 | 1 | 7000   |
| 25 | 173 | 1 | 45 | 2 | 1 | 1 | 3 | 1 | 30000  |
| 26 | 174 | 1 | 36 | 2 | 1 | 3 | 3 | 1 | 13000  |
| 27 | 175 | 1 | 52 | 2 | 1 | 2 | 3 | 1 | 30000  |
| 28 | 176 | 1 | 57 | 2 | 1 | 3 | 3 | 1 | 20000  |
| 29 | 177 | 1 | 20 | 2 | 1 | 3 | 3 | 1 | 20000  |
| 30 | 178 | 1 | 50 | 2 | 1 | 4 | 1 | 1 | 60000  |
| 31 | 179 | 1 | 57 | 2 | 1 | 4 | 3 | 1 | 25000  |
| 32 | 180 | 1 | 40 | 2 | 1 | 4 | 1 | 1 | 30000  |
| 33 | 181 | 1 | 51 | 2 | 1 | 2 | 3 | 1 | 30000  |
| 34 | 182 | 1 | 50 | 2 | 1 | 4 | 3 | 1 | 40000  |
| 35 | 183 | 1 | 45 | 2 | 1 | 3 | 3 | 1 | 30000  |
| 36 | 184 | 1 | 40 | 2 | 1 | 3 | 3 | 1 | 30000  |
| 37 | 185 | 1 | 62 | 2 | 1 | 3 | 3 | 1 | 115000 |
| 38 | 186 | 1 | 38 | 2 | 1 | 3 | 3 | 1 | 12000  |
| 39 | 187 | 1 | 52 | 2 | 1 | 2 | 3 | 1 | 30000  |
| 40 | 188 | 1 | 50 | 2 | 1 | 2 | 3 | 1 | 25000  |
| 41 | 189 | 1 | 65 | 2 | 1 | 3 | 3 | 1 | 60000  |
| 42 | 190 | 1 | 55 | 2 | 1 | 2 | 3 | 1 | 50000  |
| 43 | 191 | 1 | 50 | 2 | 1 | 1 | 3 | 1 | 15000  |
| 44 | 192 | 1 | 65 | 2 | 2 | 2 | 3 | 1 | 60000  |
| 45 | 193 | 1 | 50 | 2 | 1 | 2 | 3 | 1 | 50000  |
| 46 | 194 | 1 | 46 | 2 | 1 | 4 | 1 | 1 | 70000  |
| 47 | 195 | 1 | 51 | 2 | 1 | 3 | 3 | 1 | 55000  |
| 48 | 196 | 1 | 60 | 2 | 1 | 2 | 3 | 1 | 15000  |
| 49 | 197 | 1 | 55 | 2 | 1 | 2 | 3 | 1 | 30000  |
| 50 | 198 | 1 | 48 | 2 | 1 | 3 | 3 | 1 | 35000  |
| 51 | 199 | 1 | 65 | 2 | 1 | 4 | 2 | 1 | 20000  |

|    |     |   |    |   |   |   |   |   |        |
|----|-----|---|----|---|---|---|---|---|--------|
| 1  |     |   |    |   |   |   |   |   |        |
| 2  | 200 | 1 | 56 | 2 | 1 | 1 | 3 | 1 | 30000  |
| 3  | 201 | 1 | 34 | 2 | 1 | 3 | 4 | 1 | 20000  |
| 4  | 202 | 1 | 46 | 2 | 1 | 3 | 3 | 1 | 75000  |
| 5  | 203 | 1 | 56 | 2 | 2 | 1 | 4 | 1 | 10000  |
| 6  | 204 | 1 | 58 | 2 | 1 | 2 | 3 | 1 | 200000 |
| 8  | 205 | 1 | 30 | 2 | 1 | 4 | 1 | 1 | 30000  |
| 9  | 206 | 1 | 47 | 2 | 1 | 3 | 3 | 1 | 35000  |
| 10 | 207 | 1 | 62 | 2 | 1 | 2 | 3 | 1 | 20000  |
| 11 | 208 | 1 | 57 | 2 | 1 | 3 | 3 | 1 | 20000  |
| 12 | 209 | 1 | 37 | 2 | 1 | 4 | 3 | 1 | 30000  |
| 14 | 210 | 1 | 35 | 2 | 1 | 3 | 3 | 1 | 5000   |
| 15 | 211 | 1 | 47 | 2 | 1 | 2 | 3 | 1 | 40000  |
| 16 | 212 | 1 | 50 | 2 | 1 | 4 | 3 | 1 | 50000  |
| 17 | 213 | 1 | 50 | 1 | 1 | 3 | 2 | 1 | 50000  |
| 18 | 214 | 1 | 50 | 1 | 1 | 4 | 1 | 1 | 50000  |
| 20 | 215 | 1 | 45 | 1 | 1 | 4 | 4 | 1 | 35000  |
| 21 | 216 | 1 | 61 | 1 | 1 | 1 | 2 | 1 | 40000  |
| 22 | 217 | 1 | 41 | 1 | 1 | 3 | 4 | 1 | 15000  |
| 23 | 218 | 1 | 32 | 1 | 1 | 4 | 1 | 1 | 200000 |
| 24 | 219 | 1 | 65 | 1 | 1 | 3 | 1 | 1 | 100000 |
| 25 | 220 | 1 | 35 | 1 | 1 | 2 | 2 | 1 | 30000  |
| 27 | 221 | 1 | 45 | 1 | 1 | 4 | 1 | 1 | 50000  |
| 28 | 222 | 1 | 50 | 1 | 1 | 4 | 4 | 1 | 20000  |
| 29 | 223 | 1 | 48 | 1 | 1 | 4 | 1 | 1 | 10000  |
| 30 | 224 | 1 | 65 | 1 | 1 | 4 | 1 | 1 | 40000  |
| 32 | 225 | 1 | 35 | 1 | 1 | 3 | 1 | 1 | 6000   |
| 33 | 226 | 1 | 50 | 1 | 1 | 3 | 1 | 1 | 10000  |
| 34 | 227 | 1 | 42 | 1 | 1 | 4 | 2 | 1 | 20000  |
| 35 | 228 | 1 | 38 | 1 | 1 | 3 | 1 | 1 | 30000  |
| 36 | 229 | 1 | 30 | 1 | 1 | 4 | 4 | 1 | 10000  |
| 38 | 230 | 1 | 48 | 1 | 1 | 4 | 1 | 1 | 30000  |
| 39 | 231 | 1 | 40 | 1 | 1 | 4 | 1 | 1 | 35000  |
| 40 | 232 | 1 | 30 | 1 | 1 | 3 | 1 | 1 | 30000  |
| 41 | 233 | 1 | 63 | 1 | 1 | 3 | 2 | 1 | 20000  |
| 42 | 234 | 1 | 48 | 1 | 1 | 4 | 1 | 1 | 30000  |
| 44 | 235 | 1 | 52 | 1 | 1 | 4 | 1 | 2 | 20000  |
| 45 | 236 | 1 | 45 | 1 | 1 | 2 | 4 | 1 | 10000  |
| 46 | 237 | 1 | 38 | 1 | 1 | 4 | 1 | 1 | 15000  |
| 47 | 238 | 1 | 54 | 1 | 1 | 4 | 2 | 1 | 16000  |
| 48 | 239 | 1 | 43 | 1 | 1 | 4 | 4 | 1 | 25000  |
| 49 | 240 | 1 | 70 | 1 | 1 | 3 | 1 | 1 | 90000  |
| 50 | 241 | 1 | 32 | 1 | 1 | 4 | 4 | 1 | 5000   |
| 51 | 242 | 1 | 52 | 1 | 1 | 2 | 2 | 1 | 40000  |
| 52 | 243 | 1 | 55 | 1 | 1 | 3 | 1 | 1 | 60000  |
| 53 | 244 | 1 | 65 | 1 | 1 | 3 | 1 | 1 | 30000  |
| 54 | 245 | 1 | 48 | 1 | 1 | 3 | 2 | 1 | 40000  |
| 55 | 246 | 1 | 50 | 1 | 1 | 2 | 2 | 1 | 20000  |
| 56 | 247 | 1 | 41 | 1 | 1 | 4 | 1 | 1 | 30000  |
| 57 | 248 | 1 | 70 | 1 | 1 | 4 | 1 | 1 | 50000  |
| 58 | 249 | 1 | 70 | 1 | 1 | 3 | 2 | 1 | 50000  |

|    |     |   |    |   |   |   |   |   |        |
|----|-----|---|----|---|---|---|---|---|--------|
| 1  |     |   |    |   |   |   |   |   |        |
| 2  | 250 | 1 | 45 | 1 | 1 | 2 | 2 | 1 | 9000   |
| 3  | 251 | 1 | 40 | 1 | 1 | 4 | 3 | 1 | 20000  |
| 4  | 252 | 1 | 52 | 1 | 1 | 3 | 3 | 1 | 90000  |
| 5  | 253 | 1 | 36 | 1 | 1 | 2 | 3 | 1 | 20000  |
| 6  | 254 | 1 | 25 | 1 | 1 | 4 | 3 | 1 | 40000  |
| 7  | 255 | 1 | 45 | 1 | 1 | 3 | 2 | 1 | 30000  |
| 8  | 256 | 1 | 67 | 1 | 1 | 4 | 1 | 1 | 20000  |
| 9  | 257 | 1 | 65 | 1 | 1 | 4 | 4 | 1 | 30000  |
| 10 | 258 | 1 | 58 | 1 | 1 | 1 | 2 | 1 | 20000  |
| 11 | 259 | 1 | 48 | 1 | 1 | 3 | 4 | 1 | 45000  |
| 12 | 260 | 1 | 58 | 1 | 1 | 2 | 2 | 1 | 50000  |
| 13 | 261 | 1 | 54 | 1 | 1 | 4 | 3 | 1 | 2000   |
| 14 | 262 | 1 | 45 | 1 | 1 | 3 | 3 | 1 | 20000  |
| 15 | 263 | 1 | 55 | 1 | 1 | 2 | 3 | 1 | 200000 |
| 16 | 264 | 1 | 48 | 1 | 1 | 4 | 3 | 1 | 20000  |
| 17 | 265 | 1 | 40 | 1 | 1 | 3 | 2 | 1 | 50000  |
| 18 | 266 | 1 | 42 | 1 | 1 | 4 | 1 | 1 | 40000  |
| 19 | 267 | 1 | 60 | 1 | 1 | 4 | 4 | 1 | 20000  |
| 20 | 268 | 1 | 40 | 1 | 1 | 1 | 2 | 1 | 5000   |
| 21 | 269 | 1 | 40 | 1 | 1 | 3 | 4 | 1 | 20000  |
| 22 | 270 | 1 | 38 | 1 | 1 | 4 | 1 | 1 | 30000  |
| 23 | 271 | 1 | 72 | 2 | 2 | 1 | 3 | 1 | 20000  |
| 24 | 272 | 1 | 30 | 2 | 1 | 3 | 3 | 1 | 10000  |
| 25 | 273 | 1 | 48 | 2 | 1 | 2 | 3 | 1 | 30000  |
| 26 | 274 | 1 | 56 | 2 | 2 | 2 | 3 | 1 | 10000  |
| 27 | 275 | 1 | 40 | 2 | 1 | 2 | 3 | 1 | 35000  |
| 28 | 276 | 1 | 30 | 2 | 1 | 1 | 3 | 1 | 30000  |
| 29 | 277 | 1 | 63 | 2 | 1 | 1 | 3 | 1 | 20000  |
| 30 | 278 | 1 | 48 | 2 | 1 | 1 | 3 | 1 | 30000  |
| 31 | 279 | 1 | 52 | 2 | 1 | 1 | 3 | 1 | 20000  |
| 32 | 280 | 1 | 55 | 2 | 2 | 2 | 3 | 1 | 5000   |
| 33 | 281 | 1 | 45 | 2 | 1 | 2 | 3 | 1 | 10000  |
| 34 | 282 | 1 | 40 | 2 | 1 | 1 | 3 | 1 | 20000  |
| 35 | 283 | 1 | 50 | 2 | 2 | 1 | 3 | 1 | 50000  |
| 36 | 284 | 1 | 38 | 2 | 1 | 3 | 3 | 1 | 30000  |
| 37 | 285 | 1 | 30 | 2 | 1 | 2 | 3 | 1 | 10000  |
| 38 | 286 | 1 | 58 | 2 | 2 | 2 | 3 | 1 | 15000  |
| 39 | 287 | 1 | 48 | 1 | 1 | 2 | 3 | 1 | 30000  |
| 40 | 288 | 1 | 40 | 1 | 1 | 3 | 4 | 1 | 35000  |
| 41 | 289 | 1 | 30 | 1 | 1 | 3 | 3 | 1 | 30000  |
| 42 | 290 | 1 | 62 | 1 | 2 | 1 | 4 | 1 | 15000  |
| 43 | 291 | 1 | 63 | 1 | 1 | 2 | 3 | 1 | 20000  |
| 44 | 292 | 1 | 48 | 1 | 1 | 4 | 1 | 1 | 30000  |
| 45 | 293 | 1 | 52 | 1 | 1 | 3 | 3 | 1 | 20000  |
| 46 | 294 | 1 | 45 | 1 | 1 | 2 | 3 | 1 | 10000  |
| 47 | 295 | 1 | 45 | 1 | 2 | 3 | 3 | 1 | 2000   |
| 48 | 296 | 1 | 38 | 1 | 1 | 3 | 1 | 1 | 15000  |
| 49 | 297 | 1 | 30 | 1 | 1 | 3 | 3 | 1 | 10000  |
| 50 | 298 | 1 | 43 | 1 | 1 | 2 | 3 | 1 | 3000   |
| 51 | 299 | 1 | 54 | 2 | 1 | 3 | 3 | 1 | 15000  |

|    |     |   |    |   |   |   |   |   |        |
|----|-----|---|----|---|---|---|---|---|--------|
| 1  |     |   |    |   |   |   |   |   |        |
| 2  | 300 | 1 | 48 | 1 | 2 | 1 | 4 | 1 | 15000  |
| 3  | 301 | 1 | 45 | 1 | 2 | 3 | 1 | 1 | 20000  |
| 4  | 302 | 1 | 60 | 1 | 2 | 3 | 1 | 1 | 10000  |
| 5  | 303 | 1 | 45 | 1 | 2 | 4 | 1 | 1 | 5000   |
| 6  | 304 | 1 | 55 | 1 | 1 | 1 | 4 | 1 | 10000  |
| 7  | 305 | 1 | 43 | 2 | 1 | 1 | 3 | 1 | 20000  |
| 8  | 306 | 1 | 60 | 2 | 1 | 2 | 3 | 1 | 20000  |
| 9  | 307 | 1 | 55 | 2 | 1 | 1 | 3 | 1 | 10000  |
| 10 | 308 | 1 | 55 | 1 | 1 | 4 | 4 | 1 | 10000  |
| 11 | 309 | 1 | 60 | 2 | 1 | 2 | 3 | 1 | 100000 |
| 12 | 310 | 1 | 55 | 1 | 2 | 2 | 4 | 1 | 20000  |
| 13 | 311 | 1 | 40 | 2 | 1 | 2 | 3 | 1 | 20000  |
| 14 | 312 | 1 | 58 | 2 | 1 | 2 | 3 | 1 | 10000  |
| 15 | 313 | 1 | 60 | 2 | 1 | 2 | 3 | 1 | 20000  |
| 16 | 314 | 1 | 54 | 2 | 1 | 2 | 3 | 1 | 15000  |
| 17 | 315 | 1 | 37 | 2 | 2 | 3 | 3 | 1 | 5000   |
| 18 | 316 | 1 | 65 | 2 | 2 | 2 | 3 | 1 | 10000  |
| 19 | 317 | 1 | 85 | 2 | 2 | 1 | 3 | 1 | 2000   |
| 20 | 318 | 1 | 55 | 2 | 1 | 2 | 3 | 1 | 10000  |
| 21 | 319 | 1 | 60 | 2 | 1 | 3 | 3 | 1 | 100000 |
| 22 | 320 | 1 | 55 | 2 | 1 | 3 | 3 | 1 | 10000  |
| 23 | 321 | 1 | 60 | 2 | 1 | 3 | 3 | 1 | 20000  |
| 24 | 322 | 1 | 65 | 2 | 1 | 1 | 3 | 1 | 30000  |
| 25 | 323 | 1 | 38 | 2 | 1 | 2 | 3 | 1 | 50000  |
| 26 | 324 | 1 | 50 | 2 | 1 | 1 | 3 | 1 | 20000  |
| 27 | 325 | 1 | 43 | 2 | 2 | 2 | 3 | 1 | 3000   |
| 28 | 326 | 1 | 50 | 2 | 1 | 2 | 3 | 1 | 10000  |
| 29 | 327 | 1 | 55 | 1 | 1 | 3 | 2 | 1 | 40000  |
| 30 | 328 | 1 | 60 | 1 | 1 | 3 | 1 | 1 | 6000   |
| 31 | 329 | 1 | 26 | 1 | 1 | 3 | 2 | 1 | 10000  |
| 32 | 330 | 1 | 53 | 1 | 1 | 3 | 1 | 1 | 20000  |
| 33 | 331 | 1 | 60 | 1 | 1 | 2 | 1 | 1 | 40000  |
| 34 | 332 | 1 | 55 | 1 | 2 | 3 | 1 | 1 | 5000   |
| 35 | 333 | 1 | 51 | 1 | 1 | 3 | 1 | 1 | 10000  |
| 36 | 334 | 1 | 50 | 1 | 1 | 3 | 1 | 1 | 30000  |
| 37 | 335 | 1 | 28 | 2 | 1 | 2 | 1 | 1 | 35000  |
| 38 | 336 | 1 | 65 | 2 | 1 | 2 | 3 | 1 | 50000  |
| 39 | 337 | 1 | 66 | 2 | 1 | 3 | 3 | 1 | 40000  |
| 40 | 338 | 1 | 69 | 2 | 1 | 3 | 3 | 1 | 10000  |
| 41 | 339 | 1 | 52 | 2 | 1 | 2 | 3 | 1 | 12000  |
| 42 | 340 | 1 | 45 | 2 | 2 | 1 | 3 | 1 | 10000  |
| 43 | 341 | 1 | 70 | 2 | 1 | 3 | 3 | 1 | 30000  |
| 44 | 342 | 1 | 60 | 2 | 1 | 4 | 1 | 1 | 10000  |
| 45 | 343 | 1 | 44 | 2 | 1 | 1 | 3 | 1 | 25000  |
| 46 | 344 | 1 | 61 | 2 | 2 | 3 | 3 | 1 | 10000  |
| 47 | 345 | 1 | 24 | 2 | 1 | 3 | 2 | 1 | 12000  |
| 48 | 346 | 1 | 80 | 1 | 1 | 3 | 4 | 2 | 50000  |
| 49 | 347 | 1 | 75 | 1 | 1 | 3 | 2 | 1 | 50000  |
| 50 | 348 | 1 | 50 | 1 | 1 | 2 | 1 | 1 | 20000  |
| 51 | 349 | 1 | 56 | 1 | 1 | 1 | 3 | 1 | 300000 |

|    |     |   |    |   |   |   |   |   |        |
|----|-----|---|----|---|---|---|---|---|--------|
| 1  |     |   |    |   |   |   |   |   |        |
| 2  | 350 | 1 | 55 | 1 | 1 | 2 | 1 | 1 | 30000  |
| 3  | 351 | 1 | 50 | 1 | 2 | 4 | 1 | 1 | 15000  |
| 4  | 352 | 1 | 17 | 1 | 2 | 4 | 1 | 1 | 5000   |
| 5  | 353 | 1 | 40 | 1 | 1 | 4 | 1 | 1 | 20000  |
| 6  | 354 | 1 | 47 | 1 | 1 | 3 | 2 | 2 | 40000  |
| 7  | 355 | 1 | 30 | 1 | 1 | 3 | 1 | 1 | 20000  |
| 8  | 356 | 1 | 31 | 2 | 1 | 2 | 3 | 1 | 5000   |
| 9  | 357 | 1 | 50 | 2 | 1 | 4 | 1 | 1 | 40000  |
| 10 | 358 | 1 | 50 | 2 | 1 | 3 | 3 | 1 | 5000   |
| 11 | 359 | 1 | 40 | 2 | 1 | 2 | 3 | 1 | 10000  |
| 12 | 360 | 1 | 60 | 2 | 1 | 3 | 3 | 2 | 10000  |
| 13 | 361 | 1 | 50 | 2 | 1 | 1 | 3 | 1 | 15000  |
| 14 | 362 | 1 | 35 | 2 | 1 | 3 | 3 | 1 | 30000  |
| 15 | 363 | 1 | 44 | 2 | 1 | 2 | 3 | 1 | 10000  |
| 16 | 364 | 1 | 45 | 2 | 2 | 1 | 3 | 1 | 4000   |
| 17 | 365 | 1 | 35 | 2 | 1 | 2 | 3 | 1 | 7000   |
| 18 | 366 | 1 | 35 | 2 | 1 | 2 | 3 | 1 | 5000   |
| 19 | 367 | 1 | 53 | 2 | 1 | 1 | 3 | 1 | 10000  |
| 20 | 368 | 1 | 57 | 2 | 1 | 4 | 3 | 1 | 40000  |
| 21 | 369 | 1 | 56 | 2 | 1 | 2 | 3 | 1 | 25000  |
| 22 | 370 | 1 | 55 | 2 | 1 | 4 | 3 | 1 | 50000  |
| 23 | 371 | 1 | 60 | 2 | 1 | 4 | 1 | 1 | 20000  |
| 24 | 372 | 1 | 50 | 2 | 1 | 1 | 1 | 1 | 15000  |
| 25 | 373 | 1 | 62 | 2 | 1 | 2 | 3 | 1 | 150000 |
| 26 | 374 | 1 | 62 | 2 | 1 | 3 | 3 | 1 | 20000  |
| 27 | 375 | 1 | 45 | 2 | 1 | 3 | 3 | 1 | 10000  |
| 28 | 376 | 1 | 50 | 2 | 1 | 3 | 3 | 1 | 40000  |
| 29 | 377 | 1 | 50 | 2 | 1 | 2 | 3 | 1 | 10000  |
| 30 | 378 | 1 | 52 | 2 | 1 | 3 | 3 | 1 | 40000  |
| 31 | 379 | 1 | 33 | 2 | 1 | 3 | 3 | 2 | 25000  |
| 32 | 380 | 1 | 51 | 2 | 2 | 2 | 3 | 1 | 5000   |
| 33 | 381 | 1 | 25 | 2 | 1 | 1 | 3 | 1 | 20000  |
| 34 | 382 | 1 | 45 | 2 | 1 | 1 | 3 | 1 | 20000  |
| 35 | 383 | 1 | 32 | 2 | 1 | 2 | 3 | 1 | 16000  |
| 36 | 384 | 1 | 63 | 2 | 1 | 2 | 3 | 1 | 16000  |
| 37 | 385 | 1 | 45 | 2 | 1 | 4 | 3 | 1 | 50000  |
| 38 | 386 | 1 | 41 | 2 | 1 | 2 | 3 | 1 | 22000  |
| 39 | 387 | 1 | 40 | 2 | 1 | 3 | 3 | 1 | 50000  |
| 40 | 388 | 1 | 62 | 2 | 1 | 2 | 3 | 1 | 18000  |
| 41 | 389 | 1 | 62 | 2 | 1 | 2 | 3 | 1 | 200000 |
| 42 | 390 | 1 | 65 | 1 | 1 | 4 | 4 | 1 | 50000  |
| 43 | 391 | 1 | 60 | 1 | 1 | 4 | 1 | 1 | 5000   |
| 44 | 392 | 1 | 50 | 1 | 1 | 4 | 1 | 1 | 2000   |
| 45 | 393 | 1 | 35 | 1 | 1 | 4 | 1 | 1 | 50000  |
| 46 | 394 | 1 | 65 | 1 | 1 | 4 | 1 | 1 | 25000  |
| 47 | 395 | 1 | 60 | 1 | 1 | 3 | 2 | 1 | 50000  |
| 48 | 396 | 1 | 52 | 1 | 1 | 4 | 1 | 1 | 75000  |
| 49 | 397 | 1 | 64 | 1 | 1 | 4 | 1 | 1 | 10000  |
| 50 | 398 | 1 | 42 | 1 | 1 | 4 | 1 | 1 | 50000  |
| 51 | 399 | 1 | 48 | 1 | 1 | 4 | 1 | 1 | 80000  |

|    |     |   |    |   |   |   |   |   |        |
|----|-----|---|----|---|---|---|---|---|--------|
| 1  |     |   |    |   |   |   |   |   |        |
| 2  | 400 | 1 | 40 | 1 | 1 | 3 | 1 | 1 | 30000  |
| 3  | 401 | 1 | 53 | 1 | 1 | 3 | 1 | 1 | 12000  |
| 4  | 402 | 1 | 45 | 1 | 1 | 2 | 4 | 1 | 50000  |
| 5  | 403 | 1 | 65 | 1 | 1 | 4 | 4 | 1 | 5000   |
| 6  | 404 | 1 | 60 | 1 | 1 | 3 | 2 | 1 | 100000 |
| 8  | 405 | 1 | 60 | 1 | 1 | 4 | 1 | 1 | 50000  |
| 9  | 406 | 1 | 47 | 1 | 1 | 3 | 2 | 1 | 15000  |
| 10 | 407 | 1 | 38 | 1 | 1 | 3 | 2 | 1 | 50000  |
| 11 | 408 | 1 | 60 | 1 | 1 | 4 | 2 | 1 | 20000  |
| 12 | 409 | 1 | 80 | 1 | 1 | 3 | 2 | 1 | 80000  |
| 14 | 410 | 1 | 38 | 2 | 1 | 2 | 3 | 1 | 400000 |
| 15 | 411 | 1 | 68 | 2 | 1 | 3 | 3 | 1 | 40000  |
| 16 | 412 | 1 | 41 | 2 | 1 | 3 | 3 | 1 | 20000  |
| 17 | 413 | 1 | 47 | 2 | 1 | 3 | 3 | 1 | 50000  |
| 18 | 414 | 1 | 40 | 2 | 1 | 3 | 3 | 1 | 28000  |
| 20 | 415 | 1 | 68 | 2 | 1 | 4 | 4 | 1 | 40000  |
| 21 | 416 | 1 | 49 | 2 | 1 | 3 | 3 | 1 | 5000   |
| 22 | 417 | 1 | 36 | 2 | 1 | 1 | 3 | 1 | 10000  |
| 23 | 418 | 1 | 57 | 2 | 1 | 2 | 3 | 1 | 90000  |
| 24 | 419 | 1 | 60 | 2 | 1 | 3 | 1 | 1 | 50000  |
| 26 | 420 | 1 | 60 | 2 | 1 | 2 | 3 | 1 | 35000  |
| 27 | 421 | 1 | 45 | 2 | 1 | 2 | 3 | 1 | 31000  |
| 28 | 422 | 1 | 67 | 1 | 1 | 3 | 4 | 1 | 20000  |
| 29 | 423 | 1 | 65 | 1 | 1 | 4 | 1 | 1 | 25000  |
| 31 | 424 | 1 | 80 | 1 | 1 | 4 | 1 | 1 | 80000  |
| 32 | 425 | 1 | 30 | 1 | 1 | 3 | 2 | 1 | 15000  |
| 33 | 426 | 1 | 65 | 1 | 1 | 3 | 4 | 1 | 30000  |
| 34 | 427 | 1 | 40 | 1 | 1 | 3 | 2 | 1 | 40000  |
| 35 | 428 | 1 | 50 | 1 | 1 | 4 | 1 | 1 | 35000  |
| 37 | 429 | 1 | 28 | 1 | 1 | 4 | 4 | 1 | 20000  |
| 38 | 430 | 1 | 53 | 1 | 1 | 3 | 1 | 1 | 50000  |
| 39 | 431 | 1 | 67 | 1 | 1 | 3 | 4 | 1 | 50000  |
| 40 | 432 | 1 | 60 | 1 | 1 | 3 | 4 | 1 | 50000  |
| 41 | 433 | 1 | 65 | 1 | 1 | 4 | 1 | 1 | 22000  |
| 43 | 434 | 1 | 46 | 1 | 1 | 3 | 4 | 1 | 20000  |
| 44 | 435 | 1 | 72 | 1 | 1 | 3 | 2 | 1 | 50000  |
| 45 | 436 | 1 | 68 | 1 | 1 | 4 | 4 | 1 | 10000  |
| 46 | 437 | 1 | 39 | 1 | 1 | 4 | 2 | 1 | 30000  |
| 47 | 438 | 1 | 31 | 1 | 1 | 3 | 2 | 1 | 20000  |
| 49 | 439 | 1 | 74 | 1 | 1 | 3 | 1 | 1 | 10000  |
| 50 | 440 | 1 | 61 | 1 | 1 | 4 | 4 | 1 | 65000  |
| 51 | 441 | 1 | 51 | 1 | 1 | 2 | 1 | 1 | 20000  |
| 52 | 442 | 1 | 59 | 1 | 1 | 3 | 2 | 1 | 5000   |
| 54 | 443 | 1 | 80 | 1 | 1 | 4 | 1 | 1 | 15000  |
| 55 | 444 | 1 | 89 | 1 | 1 | 3 | 2 | 1 | 20000  |
| 56 | 445 | 1 | 50 | 1 | 2 | 3 | 4 | 1 | 5000   |
| 57 | 446 | 1 | 62 | 1 | 1 | 3 | 2 | 1 | 50000  |
| 58 | 447 | 1 | 55 | 1 | 1 | 3 | 2 | 1 | 40000  |
| 59 | 448 | 1 | 70 | 1 | 1 | 3 | 1 | 1 | 15000  |
| 60 | 449 | 1 | 65 | 1 | 1 | 2 | 3 | 1 | 12000  |

|    |     |   |    |   |   |   |   |   |        |
|----|-----|---|----|---|---|---|---|---|--------|
| 1  |     |   |    |   |   |   |   |   |        |
| 2  | 450 | 1 | 48 | 1 | 1 | 2 | 3 | 1 | 50000  |
| 3  | 451 | 1 | 44 | 2 | 1 | 2 | 3 | 1 | 50000  |
| 4  | 452 | 1 | 48 | 2 | 1 | 2 | 3 | 1 | 20000  |
| 5  | 453 | 1 | 56 | 2 | 1 | 2 | 3 | 1 | 4000   |
| 6  | 454 | 1 | 48 | 2 | 1 | 1 | 3 | 1 | 10000  |
| 7  | 455 | 1 | 40 | 2 | 1 | 2 | 3 | 1 | 50000  |
| 8  | 456 | 1 | 55 | 2 | 1 | 2 | 3 | 1 | 25000  |
| 9  | 457 | 1 | 40 | 2 | 1 | 2 | 3 | 1 | 15000  |
| 10 | 458 | 1 | 47 | 2 | 1 | 3 | 3 | 1 | 30000  |
| 11 | 459 | 1 | 41 | 2 | 1 | 1 | 3 | 1 | 20000  |
| 12 | 460 | 1 | 52 | 2 | 1 | 2 | 3 | 1 | 7000   |
| 13 | 461 | 1 | 46 | 2 | 1 | 2 | 3 | 1 | 15000  |
| 14 | 462 | 1 | 56 | 2 | 1 | 3 | 3 | 1 | 100000 |
| 15 | 463 | 1 | 39 | 2 | 1 | 2 | 3 | 1 | 20000  |
| 16 | 464 | 1 | 60 | 2 | 1 | 2 | 3 | 1 | 140000 |
| 17 | 465 | 1 | 60 | 2 | 1 | 3 | 3 | 1 | 40000  |
| 18 | 466 | 1 | 41 | 2 | 1 | 3 | 3 | 1 | 17000  |
| 19 | 467 | 1 | 58 | 2 | 1 | 2 | 3 | 1 | 27000  |
| 20 | 468 | 1 | 46 | 2 | 1 | 3 | 3 | 1 | 20000  |
| 21 | 469 | 1 | 59 | 2 | 1 | 4 | 4 | 1 | 100000 |
| 22 | 470 | 1 | 39 | 2 | 1 | 3 | 3 | 1 | 25000  |
| 23 | 471 | 1 | 50 | 2 | 1 | 4 | 4 | 1 | 22000  |
| 24 | 472 | 1 | 59 | 2 | 1 | 2 | 3 | 1 | 50000  |
| 25 | 473 | 1 | 50 | 2 | 1 | 2 | 3 | 1 | 15000  |
| 26 | 474 | 1 | 55 | 2 | 1 | 3 | 3 | 1 | 30000  |
| 27 | 475 | 1 | 67 | 2 | 1 | 3 | 3 | 1 | 100000 |
| 28 | 476 | 1 | 56 | 2 | 1 | 3 | 3 | 1 | 35000  |
| 29 | 477 | 1 | 70 | 2 | 1 | 2 | 2 | 1 | 20000  |
| 30 | 478 | 1 | 70 | 2 | 1 | 1 | 3 | 1 | 25000  |
| 31 | 479 | 1 | 59 | 2 | 1 | 2 | 3 | 1 | 10000  |
| 32 | 480 | 1 | 41 | 2 | 1 | 4 | 4 | 1 | 12000  |
| 33 | 481 | 1 | 50 | 2 | 1 | 2 | 3 | 1 | 20000  |
| 34 | 482 | 1 | 57 | 2 | 1 | 3 | 3 | 1 | 25000  |
| 35 | 483 | 1 | 66 | 2 | 1 | 1 | 3 | 1 | 40000  |
| 36 | 484 | 1 | 43 | 2 | 1 | 2 | 3 | 1 | 100000 |
| 37 | 485 | 1 | 42 | 2 | 1 | 3 | 3 | 1 | 12000  |
| 38 | 486 | 1 | 50 | 2 | 1 | 3 | 3 | 1 | 5000   |
| 39 | 487 | 1 | 66 | 2 | 1 | 2 | 3 | 1 | 200000 |
| 40 | 488 | 1 | 65 | 2 | 1 | 3 | 3 | 1 | 20000  |
| 41 | 489 | 1 | 39 | 2 | 1 | 3 | 3 | 1 | 30000  |
| 42 | 490 | 1 | 60 | 2 | 1 | 3 | 3 | 1 | 20000  |
| 43 | 491 | 1 | 46 | 2 | 1 | 2 | 4 | 1 | 10000  |
| 44 | 492 | 1 | 65 | 2 | 2 | 3 | 3 | 1 | 7000   |
| 45 | 493 | 1 | 45 | 1 | 1 | 3 | 4 | 1 | 18000  |
| 46 | 494 | 1 | 50 | 2 | 1 | 2 | 3 | 1 | 20000  |
| 47 | 495 | 1 | 62 | 2 | 1 | 2 | 3 | 1 | 30000  |
| 48 | 496 | 1 | 55 | 1 | 1 | 4 | 1 | 1 | 20000  |
| 49 | 497 | 1 | 62 | 2 | 1 | 2 | 3 | 1 | 50000  |
| 50 | 498 | 1 | 50 | 1 | 1 | 4 | 1 | 1 | 10000  |
| 51 | 499 | 1 | 65 | 2 | 1 | 2 | 3 | 1 | 35000  |

|    |     |   |    |   |   |   |   |   |        |
|----|-----|---|----|---|---|---|---|---|--------|
| 1  |     |   |    |   |   |   |   |   |        |
| 2  | 500 | 1 | 45 | 2 | 1 | 3 | 3 | 1 | 50000  |
| 3  | 501 | 1 | 58 | 1 | 1 | 3 | 1 | 1 | 15000  |
| 4  | 502 | 1 | 49 | 1 | 1 | 3 | 3 | 1 | 150000 |
| 5  | 503 | 1 | 46 | 2 | 1 | 2 | 3 | 1 | 10000  |
| 6  | 504 | 1 | 37 | 2 | 1 | 2 | 3 | 1 | 50000  |
| 8  | 505 | 1 | 50 | 1 | 1 | 1 | 3 | 1 | 50000  |
| 9  | 506 | 1 | 51 | 2 | 1 | 1 | 2 | 1 | 10000  |
| 10 | 507 | 1 | 43 | 2 | 1 | 4 | 3 | 1 | 30000  |
| 11 | 508 | 1 | 40 | 2 | 1 | 1 | 3 | 1 | 30000  |
| 12 | 509 | 1 | 55 | 2 | 1 | 3 | 3 | 1 | 50000  |
| 14 | 510 | 1 | 48 | 2 | 1 | 4 | 3 | 1 | 20000  |
| 15 | 511 | 1 | 65 | 2 | 1 | 2 | 3 | 1 | 50000  |
| 16 | 512 | 1 | 56 | 2 | 1 | 1 | 3 | 1 | 30000  |
| 17 | 513 | 1 | 50 | 2 | 1 | 3 | 3 | 1 | 30000  |
| 18 | 514 | 1 | 35 | 2 | 1 | 3 | 1 | 1 | 25000  |
| 20 | 515 | 1 | 60 | 2 | 1 | 3 | 3 | 1 | 50000  |
| 21 | 516 | 1 | 53 | 2 | 1 | 3 | 3 | 1 | 10000  |
| 22 | 517 | 1 | 62 | 2 | 1 | 1 | 3 | 1 | 100000 |
| 23 | 518 | 1 | 52 | 2 | 1 | 3 | 3 | 1 | 20000  |
| 24 | 519 | 1 | 63 | 2 | 1 | 2 | 3 | 1 | 20000  |
| 26 | 520 | 1 | 42 | 2 | 1 | 1 | 3 | 1 | 60000  |
| 27 | 521 | 1 | 45 | 2 | 2 | 2 | 3 | 1 | 10000  |
| 28 | 522 | 1 | 50 | 2 | 1 | 1 | 3 | 1 | 10000  |
| 29 | 523 | 1 | 80 | 2 | 1 | 3 | 4 | 1 | 10000  |
| 31 | 524 | 1 | 44 | 2 | 1 | 2 | 3 | 1 | 20000  |
| 32 | 525 | 1 | 72 | 2 | 1 | 2 | 3 | 1 | 40000  |
| 33 | 526 | 1 | 45 | 2 | 1 | 2 | 3 | 1 | 30000  |
| 34 | 527 | 1 | 60 | 2 | 1 | 3 | 3 | 1 | 30000  |
| 35 | 528 | 1 | 50 | 2 | 1 | 1 | 3 | 1 | 10000  |
| 36 | 529 | 1 | 31 | 2 | 1 | 3 | 3 | 1 | 30000  |
| 38 | 530 | 1 | 55 | 2 | 1 | 2 | 3 | 1 | 100000 |
| 39 | 531 | 1 | 50 | 2 | 1 | 2 | 3 | 1 | 50000  |
| 40 | 532 | 1 | 40 | 2 | 1 | 2 | 3 | 1 | 12000  |
| 41 | 533 | 1 | 48 | 2 | 1 | 2 | 3 | 1 | 20000  |
| 43 | 534 | 1 | 42 | 2 | 1 | 1 | 3 | 1 | 100000 |
| 44 | 535 | 1 | 41 | 2 | 1 | 3 | 3 | 1 | 100000 |
| 45 | 536 | 1 | 62 | 2 | 1 | 2 | 3 | 1 | 10000  |
| 46 | 537 | 1 | 50 | 2 | 1 | 2 | 3 | 1 | 15000  |
| 47 | 538 | 1 | 58 | 2 | 1 | 2 | 3 | 1 | 30000  |
| 49 | 539 | 1 | 65 | 2 | 2 | 1 | 3 | 1 | 20000  |
| 50 | 540 | 1 | 56 | 2 | 1 | 2 | 3 | 1 | 50000  |
| 51 | 541 | 1 | 37 | 1 | 1 | 3 | 3 | 1 | 15000  |
| 52 | 542 | 1 | 30 | 2 | 1 | 1 | 3 | 1 | 18000  |
| 53 | 543 | 1 | 55 | 2 | 1 | 2 | 3 | 1 | 30000  |
| 55 | 544 | 1 | 55 | 2 | 1 | 2 | 3 | 1 | 175000 |
| 56 | 545 | 1 | 49 | 1 | 1 | 2 | 3 | 1 | 20000  |
| 57 | 546 | 1 | 33 | 1 | 1 | 3 | 1 | 1 | 50000  |
| 58 | 547 | 1 | 70 | 1 | 1 | 2 | 3 | 1 | 60000  |
| 59 | 548 | 1 | 55 | 2 | 1 | 2 | 3 | 1 | 30000  |
| 60 | 549 | 1 | 55 | 1 | 1 | 1 | 1 | 1 | 60000  |



|    |     |   |    |   |   |   |   |   |        |
|----|-----|---|----|---|---|---|---|---|--------|
| 1  |     |   |    |   |   |   |   |   |        |
| 2  | 550 | 1 | 70 | 1 | 1 | 4 | 1 | 1 | 100000 |
| 3  | 551 | 1 | 60 | 2 | 1 | 2 | 1 | 1 | 35000  |
| 4  | 552 | 1 | 40 | 2 | 1 | 2 | 3 | 1 | 15000  |
| 5  | 553 | 1 | 40 | 1 | 1 | 2 | 3 | 1 | 30000  |
| 6  | 554 | 1 | 16 | 2 | 2 | 2 | 3 | 1 | 5000   |
| 8  | 555 | 1 | 50 | 2 | 1 | 2 | 3 | 1 | 15000  |
| 9  | 556 | 1 | 32 | 2 | 1 | 2 | 3 | 1 | 25000  |
| 10 | 557 | 1 | 29 | 2 | 1 | 1 | 3 | 1 | 30000  |
| 11 | 558 | 1 | 54 | 2 | 1 | 2 | 3 | 1 | 25000  |
| 12 | 559 | 1 | 60 | 1 | 1 | 2 | 2 | 1 | 20000  |
| 14 | 560 | 1 | 40 | 1 | 1 | 4 | 2 | 1 | 20000  |
| 15 | 561 | 1 | 42 | 2 | 1 | 1 | 3 | 1 | 15000  |
| 16 | 562 | 1 | 54 | 2 | 1 | 3 | 3 | 1 | 40000  |
| 17 | 563 | 1 | 42 | 2 | 1 | 2 | 3 | 1 | 27000  |
| 18 | 564 | 1 | 41 | 2 | 1 | 1 | 3 | 1 | 1000   |
| 20 | 565 | 1 | 31 | 2 | 1 | 1 | 3 | 1 | 10000  |
| 21 | 566 | 1 | 70 | 2 | 1 | 3 | 3 | 1 | 10000  |
| 22 | 567 | 1 | 40 | 2 | 1 | 2 | 3 | 1 | 13000  |
| 23 | 568 | 1 | 42 | 2 | 1 | 1 | 3 | 1 | 10000  |
| 24 | 569 | 1 | 92 | 2 | 1 | 2 | 3 | 1 | 40000  |
| 26 | 570 | 1 | 55 | 2 | 1 | 3 | 3 | 1 | 25000  |
| 27 | 571 | 1 | 58 | 2 | 1 | 2 | 3 | 1 | 20000  |
| 28 | 572 | 1 | 56 | 1 | 1 | 2 | 3 | 1 | 30000  |
| 29 | 573 | 1 | 30 | 2 | 1 | 2 | 3 | 1 | 6000   |
| 31 | 574 | 1 | 40 | 2 | 2 | 2 | 3 | 1 | 8000   |
| 32 | 575 | 1 | 35 | 2 | 1 | 1 | 3 | 1 | 40000  |
| 33 | 576 | 1 | 75 | 2 | 1 | 2 | 3 | 1 | 60000  |
| 34 | 577 | 1 | 55 | 2 | 1 | 4 | 3 | 1 | 50000  |
| 35 | 578 | 1 | 50 | 2 | 1 | 1 | 3 | 2 | 60000  |
| 36 | 579 | 1 | 62 | 1 | 1 | 3 | 2 | 1 | 25000  |
| 38 | 580 | 1 | 55 | 2 | 1 | 2 | 3 | 1 | 50000  |
| 39 | 581 | 1 | 52 | 1 | 1 | 4 | 1 | 1 | 50000  |
| 40 | 582 | 1 | 55 | 2 | 1 | 2 | 3 | 1 | 5000   |
| 41 | 583 | 1 | 50 | 2 | 1 | 3 | 1 | 1 | 7000   |
| 43 | 584 | 1 | 81 | 1 | 1 | 3 | 2 | 1 | 8000   |
| 44 | 585 | 1 | 62 | 1 | 1 | 3 | 1 | 1 | 10000  |
| 45 | 586 | 1 | 50 | 1 | 1 | 1 | 3 | 1 | 25000  |
| 46 | 587 | 1 | 45 | 2 | 1 | 1 | 3 | 1 | 50000  |
| 47 | 588 | 1 | 44 | 2 | 1 | 2 | 3 | 1 | 50000  |
| 48 | 589 | 1 | 42 | 1 | 1 | 2 | 1 | 1 | 15000  |
| 50 | 590 | 1 | 55 | 1 | 1 | 2 | 2 | 1 | 15000  |
| 51 | 591 | 1 | 60 | 1 | 1 | 2 | 2 | 1 | 35000  |
| 52 | 592 | 1 | 47 | 1 | 2 | 1 | 3 | 1 | 3500   |
| 53 | 593 | 1 | 45 | 2 | 1 | 2 | 3 | 1 | 1000   |
| 54 | 594 | 1 | 61 | 1 | 1 | 2 | 4 | 1 | 35000  |
| 56 | 595 | 1 | 57 | 2 | 1 | 2 | 3 | 1 | 8000   |
| 57 | 596 | 1 | 30 | 1 | 1 | 2 | 2 | 1 | 20000  |
| 58 | 597 | 1 | 42 | 2 | 1 | 2 | 3 | 1 | 15000  |
| 59 | 598 | 1 | 75 | 2 | 1 | 3 | 3 | 1 | 15000  |
| 60 | 599 | 1 | 40 | 2 | 2 | 1 | 3 | 1 | 1000   |

|    |     |   |    |   |   |   |   |   |        |
|----|-----|---|----|---|---|---|---|---|--------|
| 1  |     |   |    |   |   |   |   |   |        |
| 2  | 600 | 1 | 47 | 1 | 2 | 2 | 2 | 1 | 16000  |
| 3  | 601 | 1 | 47 | 2 | 1 | 2 | 3 | 1 | 12000  |
| 4  | 602 | 1 | 50 | 2 | 1 | 2 | 3 | 1 | 20000  |
| 5  | 603 | 1 | 50 | 1 | 1 | 2 | 1 | 1 | 20000  |
| 6  | 604 | 1 | 63 | 2 | 2 | 2 | 3 | 1 | 10000  |
| 8  | 605 | 1 | 55 | 2 | 1 | 2 | 3 | 1 | 8000   |
| 9  | 606 | 1 | 52 | 2 | 1 | 2 | 3 | 1 | 10000  |
| 10 | 607 | 1 | 40 | 2 | 1 | 3 | 3 | 1 | 50000  |
| 11 | 608 | 1 | 47 | 2 | 1 | 3 | 3 | 1 | 12000  |
| 12 | 609 | 1 | 50 | 2 | 1 | 2 | 3 | 1 | 10000  |
| 14 | 610 | 1 | 55 | 1 | 1 | 2 | 1 | 1 | 5000   |
| 15 | 611 | 1 | 60 | 2 | 1 | 1 | 3 | 1 | 10000  |
| 16 | 612 | 1 | 52 | 2 | 1 | 3 | 2 | 1 | 20000  |
| 17 | 613 | 1 | 51 | 2 | 1 | 2 | 3 | 1 | 15000  |
| 18 | 614 | 1 | 40 | 1 | 1 | 4 | 1 | 1 | 10000  |
| 20 | 615 | 1 | 52 | 1 | 1 | 2 | 2 | 1 | 9000   |
| 21 | 616 | 1 | 40 | 1 | 1 | 2 | 3 | 1 | 15000  |
| 22 | 617 | 1 | 70 | 2 | 1 | 3 | 3 | 1 | 5000   |
| 23 | 618 | 1 | 82 | 2 | 1 | 2 | 3 | 1 | 8000   |
| 24 | 619 | 1 | 40 | 1 | 1 | 1 | 1 | 1 | 10000  |
| 26 | 620 | 1 | 40 | 2 | 1 | 1 | 1 | 1 | 20000  |
| 27 | 621 | 1 | 50 | 2 | 1 | 3 | 1 | 1 | 15000  |
| 28 | 622 | 1 | 50 | 1 | 1 | 1 | 2 | 1 | 20000  |
| 29 | 623 | 1 | 55 | 2 | 1 | 3 | 3 | 1 | 10000  |
| 30 | 624 | 1 | 50 | 1 | 1 | 2 | 2 | 1 | 15000  |
| 32 | 625 | 1 | 81 | 2 | 2 | 2 | 3 | 1 | 10000  |
| 33 | 626 | 1 | 57 | 2 | 1 | 2 | 3 | 1 | 20000  |
| 34 | 627 | 1 | 55 | 2 | 1 | 2 | 3 | 1 | 8000   |
| 35 | 628 | 1 | 55 | 1 | 1 | 4 | 1 | 1 | 3000   |
| 36 | 629 | 1 | 55 | 1 | 1 | 3 | 1 | 1 | 50000  |
| 38 | 630 | 1 | 60 | 2 | 1 | 1 | 3 | 1 | 20000  |
| 39 | 631 | 1 | 55 | 1 | 1 | 3 | 2 | 1 | 15000  |
| 40 | 632 | 1 | 35 | 1 | 1 | 2 | 1 | 1 | 15000  |
| 41 | 633 | 1 | 48 | 2 | 1 | 3 | 3 | 1 | 20000  |
| 42 | 634 | 1 | 66 | 2 | 1 | 1 | 3 | 1 | 10000  |
| 44 | 635 | 1 | 45 | 2 | 1 | 2 | 3 | 1 | 15000  |
| 45 | 636 | 1 | 47 | 1 | 1 | 2 | 1 | 1 | 15000  |
| 46 | 637 | 1 | 48 | 1 | 1 | 2 | 1 | 1 | 15000  |
| 47 | 638 | 1 | 60 | 1 | 1 | 3 | 2 | 1 | 20000  |
| 48 | 639 | 1 | 70 | 2 | 1 | 2 | 3 | 1 | 500000 |
| 50 | 640 | 1 | 60 | 1 | 1 | 2 | 2 | 1 | 20000  |
| 51 | 641 | 2 | 50 | 2 | 2 | 2 | 3 | 1 | 35000  |
| 52 | 642 | 2 | 58 | 2 | 2 | 2 | 3 | 1 | 5000   |
| 53 | 643 | 2 | 65 | 2 | 2 | 3 | 3 | 1 | 25000  |
| 54 | 644 | 2 | 50 | 1 | 1 | 2 | 2 | 1 | 35000  |
| 56 | 645 | 2 | 50 | 2 | 2 | 1 | 3 | 1 | 10000  |
| 57 | 646 | 2 | 52 | 2 | 2 | 1 | 3 | 1 | 15000  |
| 58 | 647 | 2 | 50 | 2 | 2 | 2 | 3 | 1 | 10000  |
| 59 | 648 | 2 | 32 | 2 | 2 | 2 | 3 | 1 | 14000  |
| 60 | 649 | 2 | 55 | 2 | 2 | 2 | 3 | 1 | 10000  |

|    |     |   |    |   |   |   |   |   |       |
|----|-----|---|----|---|---|---|---|---|-------|
| 1  |     |   |    |   |   |   |   |   |       |
| 2  | 650 | 2 | 48 | 2 | 2 | 1 | 3 | 1 | 15000 |
| 3  | 651 | 2 | 50 | 2 | 2 | 3 | 3 | 1 | 10000 |
| 4  | 652 | 2 | 58 | 2 | 2 | 2 | 3 | 1 | 30000 |
| 5  | 653 | 2 | 42 | 2 | 2 | 1 | 3 | 1 | 10000 |
| 6  | 654 | 2 | 32 | 2 | 1 | 3 | 3 | 1 | 7000  |
| 8  | 655 | 2 | 42 | 2 | 1 | 2 | 3 | 1 | 10000 |
| 9  | 656 | 2 | 34 | 2 | 2 | 2 | 3 | 1 | 10000 |
| 10 | 657 | 2 | 60 | 2 | 2 | 1 | 3 | 1 | 50000 |
| 11 | 658 | 2 | 60 | 2 | 1 | 3 | 3 | 1 | 35000 |
| 12 | 659 | 2 | 55 | 2 | 2 | 1 | 3 | 1 | 6000  |
| 14 | 660 | 2 | 50 | 2 | 2 | 1 | 3 | 1 | 10000 |
| 15 | 661 | 2 | 64 | 2 | 2 | 3 | 3 | 1 | 8000  |
| 16 | 662 | 2 | 55 | 2 | 2 | 2 | 3 | 1 | 2000  |
| 17 | 663 | 2 | 39 | 2 | 2 | 2 | 3 | 1 | 3000  |
| 18 | 664 | 2 | 70 | 2 | 2 | 1 | 3 | 1 | 15000 |
| 20 | 665 | 2 | 50 | 2 | 2 | 2 | 3 | 1 | 90000 |
| 21 | 666 | 2 | 54 | 2 | 2 | 3 | 3 | 1 | 10000 |
| 22 | 667 | 2 | 53 | 1 | 2 | 4 | 1 | 1 | 10000 |
| 23 | 668 | 2 | 30 | 1 | 1 | 3 | 1 | 1 | 10000 |
| 24 | 669 | 2 | 50 | 1 | 2 | 2 | 4 | 1 | 15000 |
| 26 | 670 | 2 | 38 | 1 | 1 | 1 | 2 | 1 | 50000 |
| 27 | 671 | 2 | 61 | 1 | 1 | 2 | 1 | 1 | 20000 |
| 28 | 672 | 2 | 52 | 1 | 2 | 3 | 4 | 1 | 2000  |
| 29 | 673 | 2 | 30 | 1 | 2 | 3 | 1 | 1 | 6000  |
| 31 | 674 | 2 | 45 | 1 | 2 | 3 | 4 | 1 | 10000 |
| 32 | 675 | 2 | 38 | 1 | 2 | 3 | 2 | 1 | 2000  |
| 33 | 676 | 2 | 50 | 1 | 2 | 1 | 2 | 1 | 10000 |
| 34 | 677 | 2 | 50 | 1 | 1 | 4 | 2 | 1 | 50000 |
| 35 | 678 | 2 | 55 | 1 | 1 | 2 | 2 | 1 | 10000 |
| 36 | 679 | 2 | 45 | 1 | 1 | 2 | 2 | 1 | 15000 |
| 38 | 680 | 2 | 42 | 1 | 1 | 2 | 2 | 1 | 35000 |
| 39 | 681 | 2 | 45 | 1 | 2 | 1 | 4 | 1 | 5000  |
| 40 | 682 | 2 | 30 | 1 | 2 | 1 | 2 | 1 | 3000  |
| 41 | 683 | 2 | 45 | 1 | 2 | 3 | 4 | 1 | 20000 |
| 42 | 684 | 2 | 50 | 1 | 2 | 2 | 2 | 1 | 20000 |
| 44 | 685 | 2 | 65 | 1 | 1 | 2 | 4 | 1 | 20000 |
| 45 | 686 | 2 | 70 | 1 | 1 | 3 | 1 | 1 | 10000 |
| 46 | 687 | 2 | 50 | 1 | 2 | 1 | 4 | 1 | 10000 |
| 47 | 689 | 2 | 50 | 1 | 1 | 2 | 2 | 1 | 25000 |
| 48 | 690 | 2 | 31 | 1 | 2 | 3 | 2 | 1 | 10000 |
| 50 | 691 | 2 | 62 | 1 | 2 | 4 | 4 | 1 | 15000 |
| 51 | 692 | 2 | 35 | 1 | 2 | 3 | 2 | 1 | 10000 |
| 52 | 693 | 2 | 45 | 1 | 2 | 4 | 2 | 1 | 3000  |
| 53 | 694 | 2 | 35 | 1 | 2 | 3 | 4 | 1 | 30000 |
| 55 | 695 | 2 | 50 | 1 | 2 | 2 | 4 | 1 | 5000  |
| 56 | 696 | 2 | 50 | 1 | 2 | 1 | 4 | 1 | 5000  |
| 57 | 697 | 2 | 59 | 1 | 2 | 2 | 4 | 1 | 8000  |
| 58 | 698 | 2 | 35 | 1 | 1 | 1 | 4 | 1 | 10000 |
| 59 | 699 | 2 | 60 | 1 | 2 | 1 | 4 | 1 | 50000 |
| 60 | 700 | 2 | 40 | 1 | 1 | 4 | 4 | 1 | 6000  |

|    |     |   |    |   |   |   |   |   |        |
|----|-----|---|----|---|---|---|---|---|--------|
| 1  |     |   |    |   |   |   |   |   |        |
| 2  | 701 | 2 | 42 | 1 | 2 | 3 | 1 | 1 | 20000  |
| 3  | 702 | 2 | 48 | 1 | 1 | 3 | 4 | 1 | 12000  |
| 4  | 702 | 2 | 30 | 1 | 1 | 3 | 4 | 1 | 5000   |
| 5  | 703 | 2 | 35 | 1 | 2 | 2 | 2 | 1 | 2000   |
| 6  | 704 | 2 | 50 | 1 | 2 | 4 | 4 | 1 | 10000  |
| 8  | 705 | 2 | 35 | 1 | 2 | 4 | 4 | 1 | 8000   |
| 9  | 706 | 2 | 55 | 1 | 2 | 2 | 2 | 1 | 10000  |
| 10 | 707 | 2 | 46 | 1 | 2 | 3 | 4 | 1 | 5000   |
| 11 | 708 | 2 | 50 | 1 | 2 | 4 | 4 | 1 | 10000  |
| 12 | 709 | 2 | 35 | 1 | 2 | 2 | 2 | 1 | 20000  |
| 14 | 710 | 2 | 52 | 1 | 2 | 2 | 3 | 1 | 16000  |
| 15 | 711 | 2 | 24 | 1 | 2 | 4 | 2 | 1 | 3000   |
| 16 | 712 | 2 | 65 | 1 | 2 | 3 | 4 | 1 | 5000   |
| 17 | 713 | 2 | 40 | 1 | 2 | 3 | 2 | 1 | 10000  |
| 18 | 714 | 2 | 55 | 1 | 1 | 4 | 1 | 1 | 40000  |
| 20 | 715 | 2 | 40 | 1 | 2 | 3 | 4 | 1 | 2000   |
| 21 | 716 | 2 | 45 | 1 | 2 | 4 | 4 | 1 | 10000  |
| 22 | 717 | 2 | 51 | 1 | 2 | 4 | 4 | 1 | 5000   |
| 23 | 718 | 2 | 52 | 1 | 2 | 2 | 4 | 1 | 10000  |
| 24 | 719 | 2 | 40 | 1 | 1 | 4 | 1 | 1 | 20000  |
| 26 | 720 | 2 | 35 | 1 | 1 | 2 | 4 | 1 | 100000 |
| 27 | 721 | 2 | 55 | 1 | 2 | 3 | 4 | 1 | 15000  |
| 28 | 722 | 2 | 65 | 1 | 1 | 4 | 1 | 1 | 18000  |
| 29 | 723 | 2 | 32 | 1 | 2 | 4 | 4 | 1 | 12000  |
| 31 | 724 | 2 | 43 | 1 | 2 | 4 | 1 | 1 | 10000  |
| 32 | 725 | 2 | 30 | 1 | 1 | 1 | 4 | 1 | 15000  |
| 33 | 726 | 2 | 45 | 1 | 2 | 4 | 1 | 1 | 10000  |
| 34 | 727 | 2 | 50 | 1 | 2 | 3 | 4 | 1 | 10000  |
| 35 | 728 | 2 | 60 | 1 | 1 | 3 | 2 | 1 | 5000   |
| 36 | 729 | 2 | 60 | 1 | 1 | 2 | 1 | 1 | 30000  |
| 38 | 730 | 2 | 45 | 1 | 2 | 3 | 2 | 1 | 3000   |
| 39 | 731 | 2 | 50 | 1 | 1 | 3 | 2 | 1 | 25000  |
| 40 | 732 | 2 | 54 | 1 | 1 | 4 | 1 | 1 | 50000  |
| 41 | 733 | 2 | 59 | 1 | 1 | 4 | 2 | 1 | 30000  |
| 43 | 734 | 2 | 80 | 2 | 1 | 2 | 3 | 1 | 10000  |
| 44 | 735 | 2 | 45 | 1 | 2 | 4 | 1 | 1 | 2000   |
| 45 | 736 | 2 | 32 | 1 | 2 | 2 | 1 | 1 | 15000  |
| 46 | 737 | 2 | 62 | 1 | 2 | 2 | 4 | 1 | 100000 |
| 47 | 738 | 2 | 46 | 1 | 2 | 3 | 2 | 1 | 15000  |
| 48 | 739 | 2 | 45 | 1 | 1 | 3 | 2 | 1 | 20000  |
| 50 | 740 | 2 | 40 | 1 | 1 | 2 | 2 | 1 | 30000  |
| 51 | 741 | 2 | 40 | 1 | 2 | 3 | 1 | 1 | 80000  |
| 52 | 742 | 2 | 35 | 1 | 2 | 2 | 4 | 1 | 22000  |
| 53 | 743 | 2 | 58 | 1 | 1 | 3 | 4 | 1 | 80000  |
| 54 | 744 | 2 | 50 | 1 | 1 | 4 | 4 | 1 | 20000  |
| 56 | 745 | 2 | 32 | 1 | 2 | 4 | 1 | 1 | 30000  |
| 57 | 746 | 2 | 49 | 1 | 2 | 3 | 4 | 1 | 2000   |
| 58 | 747 | 2 | 65 | 2 | 1 | 3 | 3 | 1 | 9000   |
| 59 | 748 | 2 | 52 | 2 | 2 | 4 | 3 | 1 | 30000  |
| 60 | 749 | 2 | 47 | 2 | 1 | 4 | 3 | 1 | 50000  |

|    |     |   |    |   |   |   |   |   |        |
|----|-----|---|----|---|---|---|---|---|--------|
| 1  |     |   |    |   |   |   |   |   |        |
| 2  | 750 | 2 | 61 | 2 | 2 | 3 | 3 | 1 | 25000  |
| 3  | 751 | 2 | 48 | 2 | 1 | 4 | 1 | 2 | 120000 |
| 4  | 752 | 2 | 50 | 2 | 1 | 2 | 3 | 1 | 12000  |
| 5  | 753 | 2 | 52 | 2 | 1 | 3 | 1 | 2 | 20000  |
| 6  | 754 | 2 | 30 | 2 | 2 | 2 | 3 | 1 | 5000   |
| 8  | 755 | 2 | 44 | 2 | 1 | 2 | 3 | 1 | 50000  |
| 9  | 756 | 2 | 55 | 2 | 2 | 4 | 3 | 1 | 25000  |
| 10 | 757 | 2 | 70 | 2 | 1 | 4 | 3 | 1 | 12000  |
| 11 | 758 | 2 | 56 | 2 | 1 | 4 | 1 | 1 | 120000 |
| 12 | 759 | 2 | 60 | 2 | 1 | 1 | 3 | 1 | 20000  |
| 14 | 760 | 2 | 50 | 2 | 1 | 3 | 3 | 1 | 20000  |
| 15 | 761 | 2 | 40 | 2 | 2 | 2 | 3 | 1 | 10000  |
| 16 | 762 | 2 | 50 | 2 | 2 | 2 | 3 | 1 | 10000  |
| 17 | 763 | 2 | 31 | 2 | 2 | 2 | 3 | 1 | 20000  |
| 18 | 764 | 2 | 55 | 2 | 1 | 4 | 1 | 1 | 15000  |
| 20 | 765 | 2 | 53 | 2 | 2 | 2 | 3 | 1 | 10000  |
| 21 | 766 | 2 | 60 | 2 | 2 | 1 | 3 | 1 | 20000  |
| 22 | 767 | 2 | 50 | 2 | 2 | 1 | 3 | 1 | 15000  |
| 23 | 768 | 2 | 40 | 2 | 1 | 3 | 3 | 1 | 100000 |
| 24 | 769 | 2 | 32 | 2 | 2 | 1 | 3 | 1 | 15000  |
| 26 | 770 | 2 | 60 | 2 | 1 | 1 | 3 | 1 | 40000  |
| 27 | 771 | 2 | 55 | 2 | 2 | 3 | 3 | 1 | 15000  |
| 28 | 772 | 2 | 53 | 2 | 1 | 2 | 2 | 1 | 10000  |
| 29 | 773 | 2 | 65 | 2 | 1 | 3 | 3 | 1 | 12000  |
| 31 | 774 | 2 | 49 | 2 | 2 | 3 | 3 | 1 | 8000   |
| 32 | 775 | 2 | 57 | 2 | 1 | 2 | 3 | 1 | 20000  |
| 33 | 776 | 2 | 50 | 2 | 1 | 2 | 3 | 1 | 15000  |
| 34 | 777 | 2 | 43 | 2 | 2 | 1 | 3 | 1 | 60000  |
| 35 | 778 | 2 | 30 | 2 | 1 | 3 | 3 | 1 | 20000  |
| 36 | 779 | 2 | 60 | 2 | 2 | 1 | 3 | 1 | 25000  |
| 38 | 780 | 2 | 50 | 2 | 2 | 2 | 3 | 1 | 18000  |
| 39 | 781 | 2 | 55 | 2 | 1 | 2 | 3 | 1 | 7000   |
| 40 | 782 | 2 | 35 | 2 | 2 | 2 | 3 | 1 | 9000   |
| 41 | 783 | 2 | 50 | 2 | 2 | 1 | 3 | 1 | 15000  |
| 43 | 784 | 2 | 37 | 2 | 2 | 2 | 3 | 1 | 7000   |
| 44 | 785 | 2 | 40 | 2 | 2 | 3 | 1 | 1 | 15000  |
| 45 | 786 | 2 | 45 | 2 | 2 | 2 | 3 | 1 | 5000   |
| 46 | 787 | 2 | 37 | 2 | 2 | 4 | 3 | 1 | 5000   |
| 47 | 788 | 2 | 60 | 2 | 2 | 1 | 3 | 1 | 10000  |
| 48 | 789 | 2 | 45 | 2 | 2 | 2 | 3 | 1 | 20000  |
| 50 | 790 | 2 | 55 | 2 | 2 | 4 | 3 | 1 | 5000   |
| 51 | 791 | 2 | 42 | 2 | 2 | 2 | 3 | 1 | 20000  |
| 52 | 792 | 2 | 60 | 2 | 2 | 1 | 3 | 1 | 6000   |
| 53 | 793 | 2 | 71 | 2 | 2 | 1 | 3 | 1 | 3000   |
| 54 | 794 | 2 | 44 | 2 | 1 | 2 | 3 | 1 | 5000   |
| 56 | 795 | 2 | 45 | 2 | 1 | 1 | 3 | 1 | 45000  |
| 57 | 796 | 2 | 56 | 2 | 1 | 3 | 1 | 1 | 2000   |
| 58 | 797 | 2 | 72 | 2 | 2 | 3 | 3 | 1 | 5000   |
| 59 | 798 | 2 | 45 | 2 | 1 | 4 | 1 | 1 | 45000  |
| 60 | 799 | 2 | 38 | 2 | 1 | 2 | 2 | 1 | 12000  |

|    |     |   |    |   |   |   |   |   |        |
|----|-----|---|----|---|---|---|---|---|--------|
| 1  |     |   |    |   |   |   |   |   |        |
| 2  | 800 | 2 | 60 | 2 | 2 | 3 | 3 | 1 | 50000  |
| 3  | 801 | 2 | 46 | 2 | 2 | 2 | 3 | 1 | 8000   |
| 4  | 802 | 2 | 50 | 2 | 2 | 2 | 3 | 1 | 50000  |
| 5  | 803 | 2 | 49 | 2 | 2 | 3 | 3 | 1 | 12000  |
| 6  | 804 | 2 | 45 | 2 | 1 | 3 | 1 | 1 | 10000  |
| 7  | 805 | 2 | 54 | 2 | 2 | 2 | 3 | 1 | 10000  |
| 8  | 806 | 2 | 55 | 2 | 2 | 2 | 3 | 1 | 7000   |
| 9  | 807 | 2 | 60 | 2 | 2 | 2 | 3 | 1 | 20000  |
| 10 | 808 | 2 | 60 | 2 | 1 | 2 | 3 | 1 | 10000  |
| 11 | 809 | 2 | 27 | 2 | 1 | 3 | 3 | 1 | 2000   |
| 12 | 810 | 2 | 61 | 2 | 2 | 2 | 3 | 1 | 25000  |
| 13 | 811 | 2 | 55 | 2 | 2 | 3 | 3 | 1 | 20000  |
| 14 | 812 | 2 | 50 | 2 | 1 | 2 | 1 | 1 | 6000   |
| 15 | 813 | 2 | 35 | 2 | 1 | 3 | 3 | 1 | 6000   |
| 16 | 814 | 2 | 60 | 2 | 2 | 3 | 3 | 1 | 3000   |
| 17 | 815 | 2 | 45 | 2 | 1 | 3 | 3 | 1 | 10000  |
| 18 | 816 | 2 | 60 | 2 | 2 | 1 | 4 | 1 | 5000   |
| 19 | 817 | 2 | 40 | 2 | 2 | 1 | 3 | 1 | 2000   |
| 20 | 818 | 2 | 50 | 2 | 1 | 4 | 1 | 1 | 10000  |
| 21 | 819 | 2 | 55 | 2 | 2 | 2 | 3 | 1 | 75000  |
| 22 | 820 | 2 | 55 | 2 | 2 | 2 | 4 | 1 | 20000  |
| 23 | 821 | 2 | 62 | 2 | 2 | 2 | 3 | 1 | 10000  |
| 24 | 822 | 2 | 55 | 2 | 1 | 1 | 3 | 1 | 8000   |
| 25 | 823 | 2 | 50 | 2 | 2 | 2 | 3 | 1 | 4000   |
| 26 | 824 | 2 | 70 | 2 | 1 | 2 | 3 | 1 | 20000  |
| 27 | 825 | 2 | 65 | 2 | 2 | 2 | 3 | 1 | 10000  |
| 28 | 826 | 2 | 72 | 1 | 2 | 3 | 2 | 1 | 20000  |
| 29 | 827 | 2 | 60 | 1 | 2 | 3 | 4 | 1 | 30000  |
| 30 | 828 | 2 | 45 | 1 | 2 | 3 | 1 | 1 | 10000  |
| 31 | 829 | 2 | 55 | 1 | 2 | 3 | 4 | 1 | 12000  |
| 32 | 830 | 2 | 56 | 1 | 2 | 3 | 2 | 1 | 100000 |
| 33 | 831 | 2 | 40 | 1 | 2 | 2 | 4 | 1 | 20000  |
| 34 | 832 | 2 | 42 | 1 | 2 | 3 | 1 | 1 | 5000   |
| 35 | 833 | 2 | 59 | 2 | 2 | 2 | 3 | 1 | 10000  |
| 36 | 834 | 2 | 42 | 2 | 1 | 3 | 3 | 1 | 15000  |
| 37 | 835 | 2 | 65 | 2 | 1 | 3 | 3 | 1 | 20000  |
| 38 | 836 | 2 | 54 | 2 | 2 | 1 | 3 | 1 | 5000   |
| 39 | 837 | 2 | 52 | 2 | 2 | 2 | 3 | 1 | 20000  |
| 40 | 838 | 2 | 25 | 2 | 2 | 2 | 3 | 1 | 15000  |
| 41 | 839 | 2 | 50 | 2 | 2 | 2 | 3 | 1 | 6000   |
| 42 | 840 | 2 | 45 | 1 | 2 | 2 | 4 | 1 | 10000  |
| 43 | 841 | 2 | 29 | 1 | 2 | 1 | 4 | 1 | 5000   |
| 44 | 842 | 2 | 55 | 1 | 1 | 2 | 4 | 1 | 20000  |
| 45 | 843 | 2 | 55 | 1 | 1 | 2 | 2 | 1 | 8000   |
| 46 | 844 | 2 | 50 | 2 | 2 | 2 | 3 | 1 | 10000  |
| 47 | 845 | 2 | 22 | 1 | 2 | 4 | 2 | 1 | 8000   |
| 48 | 846 | 2 | 45 | 1 | 2 | 2 | 2 | 1 | 4000   |
| 49 | 847 | 2 | 35 | 1 | 2 | 2 | 4 | 2 | 20000  |
| 50 | 848 | 2 | 45 | 1 | 2 | 1 | 4 | 1 | 10000  |
| 51 | 849 | 2 | 48 | 1 | 2 | 4 | 1 | 1 | 20000  |

|    |     |   |    |   |   |   |   |   |       |
|----|-----|---|----|---|---|---|---|---|-------|
| 1  |     |   |    |   |   |   |   |   |       |
| 2  | 850 | 2 | 30 | 1 | 2 | 3 | 1 | 1 | 30000 |
| 3  | 851 | 2 | 40 | 1 | 2 | 2 | 4 | 1 | 10000 |
| 4  | 852 | 2 | 42 | 1 | 2 | 3 | 1 | 1 | 40000 |
| 5  | 853 | 2 | 59 | 1 | 2 | 3 | 2 | 1 | 20000 |
| 6  | 854 | 2 | 92 | 2 | 2 | 2 | 3 | 1 | 1500  |
| 7  | 855 | 2 | 50 | 1 | 2 | 3 | 1 | 1 | 30000 |
| 8  | 856 | 2 | 54 | 1 | 2 | 1 | 4 | 1 | 5000  |
| 9  | 857 | 2 | 27 | 1 | 1 | 1 | 3 | 1 | 10000 |
| 10 | 858 | 2 | 59 | 1 | 2 | 2 | 2 | 1 | 12000 |
| 11 | 859 | 2 | 55 | 1 | 1 | 4 | 1 | 1 | 10000 |
| 12 | 860 | 2 | 48 | 1 | 2 | 4 | 1 | 1 | 18000 |
| 13 | 861 | 2 | 22 | 1 | 2 | 3 | 2 | 1 | 8000  |
| 14 | 862 | 2 | 52 | 1 | 1 | 4 | 4 | 1 | 10000 |
| 15 | 863 | 2 | 35 | 1 | 1 | 3 | 2 | 1 | 10000 |
| 16 | 864 | 2 | 20 | 1 | 1 | 4 | 1 | 1 | 6000  |
| 17 | 865 | 2 | 35 | 1 | 2 | 4 | 1 | 1 | 5000  |
| 18 | 866 | 2 | 58 | 1 | 2 | 2 | 4 | 1 | 60000 |
| 19 | 867 | 2 | 49 | 1 | 2 | 4 | 1 | 1 | 9000  |
| 20 | 868 | 2 | 47 | 1 | 2 | 2 | 4 | 1 | 30000 |
| 21 | 869 | 2 | 58 | 1 | 2 | 4 | 2 | 1 | 5000  |
| 22 | 870 | 2 | 55 | 1 | 2 | 3 | 1 | 1 | 6000  |
| 23 | 871 | 2 | 50 | 1 | 1 | 3 | 4 | 1 | 40000 |
| 24 | 872 | 2 | 60 | 1 | 2 | 1 | 4 | 1 | 20000 |
| 25 | 873 | 2 | 51 | 1 | 2 | 4 | 2 | 1 | 15000 |
| 26 | 874 | 2 | 60 | 1 | 1 | 3 | 4 | 1 | 10000 |
| 27 | 875 | 2 | 59 | 1 | 2 | 1 | 4 | 1 | 40000 |
| 28 | 876 | 2 | 55 | 1 | 2 | 1 | 4 | 1 | 20000 |
| 29 | 877 | 2 | 35 | 1 | 2 | 3 | 1 | 1 | 5000  |
| 30 | 878 | 2 | 48 | 2 | 2 | 2 | 3 | 1 | 3000  |
| 31 | 879 | 2 | 56 | 2 | 2 | 1 | 3 | 1 | 10000 |
| 32 | 880 | 2 | 46 | 2 | 2 | 1 | 4 | 1 | 40000 |
| 33 | 881 | 2 | 45 | 2 | 1 | 2 | 3 | 1 | 20000 |
| 34 | 882 | 2 | 45 | 2 | 1 | 2 | 3 | 1 | 40000 |
| 35 | 883 | 2 | 58 | 2 | 2 | 2 | 3 | 1 | 3000  |
| 36 | 884 | 2 | 73 | 2 | 2 | 2 | 3 | 1 | 10000 |
| 37 | 885 | 2 | 48 | 2 | 2 | 1 | 3 | 1 | 15000 |
| 38 | 886 | 2 | 43 | 2 | 2 | 2 | 3 | 1 | 4000  |
| 39 | 887 | 2 | 45 | 2 | 2 | 2 | 3 | 1 | 12000 |
| 40 | 888 | 2 | 39 | 2 | 2 | 2 | 3 | 1 | 10000 |
| 41 | 889 | 2 | 55 | 2 | 2 | 2 | 3 | 1 | 15000 |
| 42 | 890 | 2 | 55 | 2 | 2 | 2 | 3 | 1 | 14000 |
| 43 | 891 | 2 | 35 | 2 | 2 | 1 | 3 | 1 | 4000  |
| 44 | 892 | 2 | 52 | 2 | 2 | 2 | 3 | 1 | 5000  |
| 45 | 893 | 2 | 30 | 2 | 2 | 2 | 3 | 1 | 4000  |
| 46 | 894 | 2 | 44 | 2 | 2 | 2 | 3 | 1 | 3000  |
| 47 | 895 | 2 | 66 | 2 | 2 | 3 | 3 | 1 | 2000  |
| 48 | 896 | 2 | 59 | 2 | 1 | 2 | 3 | 1 | 30000 |
| 49 | 897 | 2 | 44 | 1 | 2 | 1 | 4 | 1 | 7000  |
| 50 | 898 | 2 | 33 | 2 | 2 | 2 | 3 | 1 | 10000 |
| 51 | 899 | 2 | 34 | 2 | 2 | 3 | 3 | 1 | 10000 |

|    |     |   |    |   |   |   |   |   |       |
|----|-----|---|----|---|---|---|---|---|-------|
| 1  |     |   |    |   |   |   |   |   |       |
| 2  | 900 | 2 | 58 | 2 | 2 | 1 | 3 | 1 | 25000 |
| 3  | 901 | 2 | 54 | 2 | 2 | 2 | 3 | 1 | 15000 |
| 4  | 902 | 2 | 57 | 2 | 2 | 3 | 3 | 1 | 60000 |
| 5  | 903 | 2 | 50 | 2 | 1 | 3 | 3 | 1 | 12000 |
| 6  | 904 | 2 | 46 | 2 | 2 | 3 | 3 | 1 | 20000 |
| 7  | 905 | 2 | 25 | 2 | 2 | 2 | 3 | 1 | 25000 |
| 8  | 906 | 2 | 47 | 2 | 2 | 1 | 3 | 1 | 10000 |
| 9  | 907 | 2 | 55 | 2 | 2 | 2 | 3 | 1 | 40000 |
| 10 | 908 | 2 | 60 | 2 | 1 | 1 | 3 | 1 | 10000 |
| 11 | 909 | 2 | 63 | 2 | 2 | 2 | 3 | 1 | 20000 |
| 12 | 910 | 2 | 52 | 2 | 1 | 2 | 3 | 1 | 10000 |
| 13 | 911 | 2 | 45 | 2 | 2 | 2 | 3 | 1 | 30000 |
| 14 | 912 | 2 | 54 | 2 | 1 | 4 | 1 | 1 | 40000 |
| 15 | 913 | 2 | 36 | 2 | 2 | 2 | 4 | 1 | 15000 |
| 16 | 914 | 2 | 40 | 2 | 2 | 2 | 2 | 1 | 10000 |
| 17 | 915 | 2 | 68 | 2 | 1 | 1 | 3 | 1 | 3000  |
| 18 | 916 | 2 | 58 | 2 | 1 | 1 | 3 | 1 | 50000 |
| 19 | 917 | 2 | 45 | 2 | 2 | 2 | 3 | 1 | 15000 |
| 20 | 918 | 2 | 62 | 2 | 1 | 3 | 4 | 1 | 11000 |
| 21 | 919 | 2 | 40 | 2 | 2 | 2 | 2 | 1 | 9000  |
| 22 | 920 | 2 | 57 | 2 | 1 | 2 | 3 | 1 | 50000 |
| 23 | 921 | 2 | 40 | 2 | 2 | 3 | 3 | 1 | 60000 |
| 24 | 922 | 2 | 45 | 2 | 2 | 1 | 4 | 1 | 20000 |
| 25 | 923 | 2 | 51 | 2 | 2 | 1 | 3 | 1 | 7000  |
| 26 | 924 | 2 | 56 | 2 | 2 | 3 | 3 | 1 | 10000 |
| 27 | 925 | 2 | 35 | 2 | 2 | 1 | 3 | 1 | 20000 |
| 28 | 926 | 2 | 75 | 2 | 2 | 1 | 3 | 1 | 20000 |
| 29 | 927 | 2 | 60 | 2 | 1 | 3 | 1 | 1 | 7000  |
| 30 | 928 | 2 | 56 | 2 | 2 | 2 | 3 | 1 | 20000 |
| 31 | 929 | 2 | 57 | 2 | 2 | 1 | 3 | 1 | 7000  |
| 32 | 930 | 2 | 72 | 2 | 1 | 3 | 1 | 1 | 3000  |
| 33 | 931 | 2 | 56 | 2 | 2 | 2 | 3 | 1 | 15000 |
| 34 | 932 | 2 | 60 | 2 | 2 | 3 | 3 | 1 | 6000  |
| 35 | 933 | 2 | 53 | 2 | 2 | 1 | 3 | 1 | 20000 |
| 36 | 934 | 2 | 40 | 2 | 2 | 1 | 3 | 1 | 5000  |
| 37 | 935 | 2 | 55 | 2 | 2 | 4 | 4 | 1 | 30000 |
| 38 | 936 | 2 | 67 | 2 | 1 | 1 | 3 | 1 | 15000 |
| 39 | 937 | 2 | 50 | 2 | 1 | 1 | 3 | 1 | 20000 |
| 40 | 938 | 2 | 47 | 2 | 1 | 1 | 3 | 1 | 3000  |
| 41 | 939 | 2 | 57 | 2 | 2 | 2 | 3 | 1 | 16000 |
| 42 | 940 | 2 | 27 | 2 | 1 | 4 | 3 | 1 | 5000  |
| 43 | 941 | 2 | 50 | 2 | 2 | 2 | 3 | 1 | 12000 |
| 44 | 942 | 2 | 53 | 2 | 2 | 2 | 3 | 1 | 15000 |
| 45 | 943 | 2 | 45 | 2 | 1 | 3 | 3 | 1 | 5000  |
| 46 | 944 | 2 | 52 | 2 | 2 | 3 | 3 | 1 | 30000 |
| 47 | 945 | 2 | 40 | 2 | 1 | 2 | 3 | 1 | 4000  |
| 48 | 946 | 2 | 47 | 1 | 1 | 3 | 1 | 1 | 5000  |
| 49 | 947 | 2 | 50 | 2 | 2 | 3 | 1 | 1 | 20000 |
| 50 | 948 | 2 | 50 | 2 | 1 | 3 | 1 | 2 | 8000  |
| 51 | 949 | 2 | 58 | 2 | 1 | 2 | 3 | 1 | 15000 |



|    |     |   |    |   |   |   |   |   |        |
|----|-----|---|----|---|---|---|---|---|--------|
| 1  |     |   |    |   |   |   |   |   |        |
| 2  | 950 | 2 | 50 | 2 | 1 | 3 | 1 | 1 | 8000   |
| 3  | 951 | 2 | 32 | 2 | 1 | 3 | 3 | 1 | 7000   |
| 4  | 952 | 2 | 40 | 2 | 1 | 2 | 3 | 1 | 10000  |
| 5  | 953 | 2 | 70 | 2 | 1 | 3 | 1 | 1 | 20000  |
| 6  | 954 | 2 | 50 | 2 | 1 | 3 | 3 | 1 | 16000  |
| 7  | 955 | 2 | 38 | 2 | 1 | 3 | 1 | 1 | 15000  |
| 8  | 956 | 2 | 49 | 2 | 2 | 2 | 3 | 1 | 35000  |
| 9  | 957 | 2 | 55 | 2 | 2 | 2 | 3 | 1 | 19000  |
| 10 | 958 | 2 | 35 | 2 | 2 | 2 | 3 | 1 | 7000   |
| 11 | 959 | 2 | 66 | 2 | 1 | 2 | 3 | 1 | 150000 |
| 12 | 960 | 2 | 57 | 2 | 1 | 3 | 1 | 1 | 22000  |
| 13 | 961 | 2 | 55 | 2 | 2 | 1 | 3 | 1 | 6000   |
| 14 | 962 | 2 | 65 | 2 | 1 | 3 | 1 | 1 | 6000   |
| 15 | 963 | 2 | 55 | 2 | 1 | 2 | 3 | 1 | 10000  |
| 16 | 964 | 2 | 50 | 2 | 2 | 2 | 3 | 1 | 6000   |
| 17 | 965 | 2 | 73 | 2 | 2 | 2 | 3 | 1 | 30000  |
| 18 | 966 | 2 | 59 | 2 | 2 | 3 | 3 | 1 | 15000  |
| 19 | 967 | 2 | 65 | 2 | 1 | 3 | 3 | 1 | 30000  |
| 20 | 968 | 2 | 60 | 2 | 1 | 2 | 3 | 1 | 5000   |
| 21 | 969 | 2 | 50 | 1 | 2 | 3 | 4 | 1 | 9000   |
| 22 | 970 | 2 | 56 | 1 | 2 | 4 | 1 | 1 | 20000  |
| 23 | 971 | 2 | 50 | 1 | 2 | 3 | 2 | 1 | 5000   |
| 24 | 972 | 2 | 75 | 1 | 1 | 3 | 2 | 1 | 7000   |
| 25 | 973 | 2 | 80 | 1 | 2 | 1 | 4 | 1 | 7000   |
| 26 | 974 | 2 | 60 | 1 | 2 | 2 | 4 | 2 | 20000  |
| 27 | 975 | 2 | 78 | 1 | 2 | 3 | 2 | 1 | 1000   |
| 28 | 976 | 2 | 52 | 1 | 1 | 3 | 1 | 1 | 20000  |
| 29 | 977 | 2 | 60 | 1 | 1 | 4 | 1 | 1 | 20000  |
| 30 | 978 | 2 | 51 | 1 | 2 | 1 | 4 | 1 | 12000  |
| 31 | 979 | 2 | 45 | 1 | 2 | 2 | 4 | 1 | 5000   |
| 32 | 980 | 2 | 60 | 1 | 1 | 4 | 4 | 1 | 20000  |
| 33 | 981 | 2 | 45 | 1 | 2 | 3 | 4 | 1 | 7000   |
| 34 | 982 | 2 | 67 | 1 | 2 | 3 | 4 | 1 | 8500   |
| 35 | 983 | 2 | 40 | 1 | 2 | 3 | 1 | 1 | 20000  |
| 36 | 984 | 2 | 63 | 1 | 2 | 3 | 1 | 1 | 8000   |
| 37 | 985 | 2 | 50 | 2 | 1 | 2 | 3 | 1 | 5000   |
| 38 | 986 | 2 | 35 | 2 | 2 | 1 | 3 | 1 | 7000   |
| 39 | 987 | 2 | 47 | 2 | 2 | 2 | 3 | 1 | 20000  |
| 40 | 988 | 2 | 50 | 2 | 2 | 3 | 3 | 1 | 10000  |
| 41 | 989 | 2 | 62 | 2 | 1 | 3 | 1 | 1 | 40000  |
| 42 | 990 | 2 | 62 | 2 | 1 | 2 | 3 | 1 | 10000  |
| 43 | 991 | 2 | 65 | 2 | 2 | 1 | 3 | 1 | 10000  |
| 44 | 992 | 2 | 62 | 2 | 1 | 2 | 3 | 1 | 5000   |
| 45 | 993 | 2 | 66 | 2 | 1 | 3 | 3 | 1 | 150000 |
| 46 | 994 | 2 | 73 | 2 | 1 | 3 | 3 | 1 | 15000  |
| 47 | 995 | 2 | 48 | 2 | 1 | 2 | 3 | 1 | 10000  |
| 48 | 996 | 2 | 50 | 2 | 2 | 3 | 3 | 1 | 12000  |
| 49 | 997 | 2 | 57 | 2 | 1 | 3 | 3 | 1 | 20000  |
| 50 | 998 | 2 | 47 | 2 | 1 | 3 | 3 | 1 | 25000  |
| 51 | 999 | 2 | 55 | 2 | 2 | 2 | 3 | 1 | 8000   |

|    |      |   |    |   |   |   |   |   |       |
|----|------|---|----|---|---|---|---|---|-------|
| 1  |      |   |    |   |   |   |   |   |       |
| 2  | 1000 | 2 | 40 | 2 | 2 | 2 | 3 | 1 | 10000 |
| 3  | 1001 | 2 | 45 | 2 | 2 | 2 | 3 | 1 | 8000  |
| 4  | 1002 | 2 | 62 | 2 | 1 | 4 | 1 | 1 | 10000 |
| 5  | 1003 | 2 | 45 | 2 | 1 | 3 | 3 | 1 | 15000 |
| 6  | 1004 | 2 | 46 | 2 | 1 | 2 | 1 | 1 | 35000 |
| 8  | 1005 | 2 | 55 | 2 | 2 | 1 | 3 | 1 | 10000 |
| 9  | 1006 | 2 | 59 | 2 | 1 | 3 | 3 | 1 | 5000  |
| 10 | 1007 | 2 | 74 | 2 | 1 | 3 | 3 | 1 | 5000  |
| 11 | 1008 | 2 | 60 | 2 | 1 | 3 | 3 | 1 | 10000 |
| 12 | 1009 | 2 | 70 | 2 | 1 | 2 | 3 | 1 | 4000  |
| 14 | 1010 | 2 | 60 | 2 | 2 | 2 | 3 | 1 | 15000 |
| 15 | 1011 | 2 | 63 | 2 | 1 | 3 | 3 | 1 | 7000  |
| 16 | 1012 | 2 | 62 | 2 | 1 | 2 | 3 | 1 | 5000  |
| 17 | 1013 | 2 | 70 | 2 | 1 | 3 | 3 | 1 | 20000 |
| 18 | 1014 | 2 | 43 | 1 | 1 | 3 | 1 | 1 | 22000 |
| 20 | 1015 | 2 | 50 | 1 | 2 | 1 | 2 | 1 | 6000  |
| 21 | 1016 | 2 | 45 | 2 | 2 | 3 | 1 | 1 | 15000 |
| 22 | 1017 | 2 | 63 | 2 | 2 | 3 | 2 | 1 | 15000 |
| 23 | 1018 | 2 | 63 | 1 | 1 | 4 | 1 | 1 | 20000 |
| 24 | 1019 | 2 | 35 | 2 | 2 | 1 | 3 | 1 | 4000  |
| 25 | 1020 | 2 | 60 | 2 | 2 | 2 | 3 | 1 | 15000 |
| 27 | 1021 | 2 | 73 | 2 | 2 | 1 | 3 | 1 | 10000 |
| 28 | 1022 | 2 | 58 | 2 | 2 | 3 | 3 | 1 | 15000 |
| 29 | 1023 | 2 | 40 | 2 | 2 | 3 | 1 | 1 | 15000 |
| 30 | 1024 | 2 | 65 | 2 | 2 | 2 | 3 | 1 | 9000  |
| 32 | 1025 | 2 | 50 | 2 | 2 | 1 | 3 | 1 | 10000 |
| 33 | 1026 | 2 | 45 | 2 | 2 | 2 | 1 | 1 | 15000 |
| 34 | 1027 | 2 | 35 | 2 | 2 | 3 | 1 | 1 | 12000 |
| 35 | 1028 | 2 | 46 | 2 | 2 | 3 | 3 | 1 | 15000 |
| 36 | 1029 | 2 | 63 | 2 | 2 | 1 | 3 | 1 | 12000 |
| 38 | 1030 | 2 | 45 | 2 | 2 | 2 | 1 | 1 | 40000 |
| 39 | 1031 | 2 | 63 | 2 | 2 | 2 | 3 | 1 | 15000 |
| 40 | 1032 | 2 | 45 | 2 | 2 | 1 | 3 | 1 | 9000  |
| 41 | 1033 | 2 | 40 | 2 | 2 | 2 | 3 | 1 | 10000 |
| 42 | 1034 | 2 | 42 | 2 | 2 | 2 | 3 | 1 | 10000 |
| 44 | 1035 | 2 | 61 | 2 | 2 | 2 | 3 | 1 | 18000 |
| 45 | 1036 | 2 | 66 | 2 | 2 | 1 | 3 | 1 | 4000  |
| 46 | 1037 | 2 | 62 | 2 | 2 | 2 | 3 | 1 | 10000 |
| 47 | 1038 | 2 | 60 | 2 | 2 | 2 | 3 | 1 | 10000 |
| 49 | 1039 | 2 | 50 | 2 | 2 | 2 | 3 | 1 | 8000  |
| 50 | 1040 | 2 | 45 | 2 | 2 | 3 | 1 | 1 | 8000  |
| 51 | 1041 | 2 | 45 | 2 | 2 | 2 | 3 | 1 | 5000  |
| 52 | 1042 | 2 | 60 | 2 | 2 | 1 | 3 | 1 | 7000  |
| 53 | 1043 | 2 | 45 | 2 | 1 | 3 | 3 | 1 | 10000 |
| 55 | 1044 | 2 | 60 | 2 | 1 | 3 | 1 | 1 | 5000  |
| 56 | 1045 | 2 | 61 | 2 | 2 | 3 | 3 | 1 | 45000 |
| 57 | 1046 | 2 | 43 | 2 | 1 | 3 | 1 | 1 | 10000 |
| 58 | 1047 | 2 | 69 | 1 | 1 | 4 | 2 | 1 | 10000 |
| 59 | 1048 | 2 | 40 | 2 | 1 | 1 | 3 | 1 | 10000 |
| 60 | 1049 | 2 | 42 | 2 | 1 | 3 | 3 | 1 | 10000 |

|    |      |   |    |   |   |   |   |   |       |
|----|------|---|----|---|---|---|---|---|-------|
| 1  |      |   |    |   |   |   |   |   |       |
| 2  | 1050 | 2 | 62 | 2 | 1 | 3 | 3 | 1 | 15000 |
| 3  | 1051 | 2 | 70 | 2 | 1 | 3 | 3 | 1 | 10000 |
| 4  | 1052 | 2 | 49 | 2 | 1 | 1 | 3 | 1 | 10000 |
| 5  | 1053 | 2 | 58 | 2 | 2 | 1 | 3 | 1 | 45000 |
| 6  | 1054 | 2 | 53 | 2 | 2 | 2 | 3 | 1 | 20000 |
| 7  | 1055 | 2 | 44 | 2 | 1 | 3 | 3 | 1 | 15000 |
| 8  | 1056 | 2 | 40 | 2 | 2 | 2 | 3 | 1 | 15000 |
| 9  | 1057 | 2 | 60 | 2 | 2 | 4 | 1 | 1 | 8000  |
| 10 | 1058 | 2 | 48 | 2 | 1 | 2 | 3 | 1 | 20000 |
| 11 | 1059 | 2 | 56 | 2 | 2 | 1 | 3 | 1 | 30000 |
| 12 | 1060 | 2 | 65 | 2 | 1 | 3 | 3 | 1 | 20000 |
| 13 | 1061 | 2 | 57 | 2 | 1 | 3 | 3 | 1 | 7000  |
| 14 | 1062 | 2 | 70 | 2 | 1 | 1 | 3 | 1 | 20000 |
| 15 | 1063 | 2 | 52 | 2 | 1 | 2 | 3 | 1 | 50000 |
| 16 | 1064 | 2 | 49 | 2 | 2 | 2 | 3 | 1 | 8000  |
| 17 | 1065 | 2 | 60 | 2 | 1 | 1 | 3 | 1 | 70000 |
| 18 | 1066 | 2 | 55 | 2 | 1 | 3 | 1 | 1 | 10000 |
| 19 | 1067 | 2 | 55 | 2 | 1 | 2 | 3 | 1 | 10000 |
| 20 | 1068 | 2 | 93 | 2 | 1 | 3 | 3 | 1 | 50000 |
| 21 | 1069 | 2 | 68 | 2 | 1 | 1 | 3 | 1 | 60000 |
| 22 | 1070 | 2 | 70 | 2 | 2 | 1 | 3 | 1 | 5000  |
| 23 | 1071 | 2 | 60 | 1 | 1 | 3 | 1 | 1 | 8000  |
| 24 | 1072 | 2 | 59 | 1 | 1 | 4 | 1 | 1 | 32000 |
| 25 | 1073 | 2 | 75 | 1 | 1 | 2 | 1 | 1 | 25000 |
| 26 | 1074 | 2 | 80 | 1 | 2 | 3 | 2 | 1 | 30000 |
| 27 | 1075 | 2 | 48 | 1 | 1 | 3 | 1 | 1 | 20000 |
| 28 | 1076 | 2 | 30 | 1 | 1 | 1 | 1 | 1 | 15000 |
| 29 | 1077 | 2 | 44 | 1 | 1 | 4 | 1 | 1 | 30000 |
| 30 | 1078 | 2 | 65 | 1 | 2 | 3 | 1 | 1 | 50000 |
| 31 | 1079 | 2 | 52 | 1 | 1 | 3 | 1 | 1 | 20000 |
| 32 | 1080 | 2 | 47 | 1 | 1 | 2 | 2 | 1 | 15000 |
| 33 | 1081 | 2 | 42 | 1 | 2 | 2 | 4 | 1 | 30000 |
| 34 | 1082 | 2 | 75 | 1 | 1 | 3 | 4 | 1 | 20000 |
| 35 | 1083 | 2 | 50 | 1 | 1 | 2 | 2 | 1 | 5000  |
| 36 | 1084 | 2 | 36 | 1 | 1 | 2 | 1 | 1 | 8000  |
| 37 | 1085 | 2 | 24 | 1 | 2 | 3 | 2 | 1 | 7000  |
| 38 | 1086 | 2 | 47 | 1 | 2 | 4 | 1 | 1 | 10000 |
| 39 | 1087 | 2 | 41 | 1 | 1 | 3 | 1 | 1 | 7000  |
| 40 | 1088 | 2 | 49 | 2 | 1 | 2 | 3 | 1 | 20000 |
| 41 | 1089 | 2 | 35 | 2 | 1 | 1 | 3 | 1 | 30000 |
| 42 | 1090 | 2 | 37 | 2 | 1 | 1 | 3 | 1 | 70000 |
| 43 | 1091 | 2 | 50 | 2 | 1 | 2 | 3 | 1 | 6000  |
| 44 | 1092 | 2 | 50 | 1 | 1 | 3 | 1 | 2 | 40000 |
| 45 | 1093 | 2 | 23 | 1 | 1 | 3 | 4 | 1 | 20000 |
| 46 | 1094 | 2 | 52 | 1 | 1 | 3 | 1 | 1 | 10000 |
| 47 | 1095 | 2 | 30 | 1 | 2 | 1 | 4 | 1 | 7000  |
| 48 | 1096 | 2 | 45 | 2 | 1 | 2 | 3 | 1 | 10000 |
| 49 | 1097 | 2 | 60 | 1 | 2 | 1 | 4 | 1 | 8000  |
| 50 | 1098 | 2 | 42 | 2 | 2 | 1 | 3 | 1 | 12000 |
| 51 | 1099 | 2 | 35 | 2 | 1 | 1 | 3 | 1 | 60000 |

|    |      |   |    |   |   |   |   |   |       |
|----|------|---|----|---|---|---|---|---|-------|
| 1  |      |   |    |   |   |   |   |   |       |
| 2  | 1100 | 2 | 53 | 1 | 1 | 1 | 4 | 1 | 25000 |
| 3  | 1101 | 2 | 70 | 1 | 1 | 3 | 2 | 1 | 10000 |
| 4  | 1102 | 2 | 46 | 2 | 1 | 2 | 3 | 1 | 15000 |
| 5  | 1103 | 2 | 43 | 2 | 2 | 1 | 3 | 1 | 20000 |
| 6  | 1104 | 2 | 49 | 2 | 1 | 2 | 3 | 1 | 20000 |
| 8  | 1105 | 2 | 70 | 1 | 1 | 4 | 1 | 1 | 7000  |
| 9  | 1106 | 2 | 79 | 2 | 1 | 1 | 3 | 1 | 50000 |
| 10 | 1107 | 2 | 25 | 2 | 1 | 3 | 3 | 1 | 50000 |
| 11 | 1108 | 2 | 40 | 1 | 1 | 1 | 4 | 1 | 10000 |
| 12 | 1109 | 2 | 50 | 2 | 1 | 1 | 3 | 1 | 10000 |
| 13 | 1110 | 2 | 30 | 2 | 1 | 1 | 3 | 1 | 50000 |
| 14 | 1111 | 2 | 46 | 1 | 1 | 3 | 2 | 1 | 3000  |
| 15 | 1112 | 2 | 70 | 1 | 2 | 2 | 4 | 1 | 25000 |
| 16 | 1113 | 2 | 35 | 1 | 1 | 4 | 4 | 1 | 5000  |
| 17 | 1114 | 2 | 45 | 1 | 1 | 4 | 1 | 1 | 30000 |
| 18 | 1115 | 2 | 47 | 1 | 1 | 4 | 4 | 1 | 30000 |
| 19 | 1116 | 2 | 65 | 2 | 1 | 1 | 3 | 1 | 15000 |
| 20 | 1117 | 2 | 20 | 2 | 2 | 1 | 3 | 1 | 10000 |
| 21 | 1118 | 2 | 45 | 2 | 2 | 1 | 3 | 1 | 6000  |
| 22 | 1119 | 2 | 55 | 1 | 1 | 1 | 1 | 1 | 10000 |
| 23 | 1120 | 2 | 65 | 2 | 1 | 2 | 3 | 1 | 30000 |
| 24 | 1121 | 2 | 46 | 1 | 1 | 2 | 1 | 1 | 5000  |
| 25 | 1122 | 2 | 45 | 1 | 1 | 4 | 4 | 1 | 10000 |
| 26 | 1123 | 2 | 41 | 1 | 2 | 2 | 2 | 1 | 30000 |
| 27 | 1124 | 2 | 47 | 2 | 2 | 1 | 3 | 1 | 20000 |
| 28 | 1125 | 2 | 55 | 2 | 1 | 2 | 3 | 1 | 10000 |
| 29 | 1126 | 2 | 70 | 2 | 2 | 1 | 3 | 1 | 20000 |
| 30 | 1127 | 2 | 43 | 2 | 1 | 4 | 4 | 1 | 15000 |
| 31 | 1128 | 2 | 55 | 1 | 1 | 3 | 2 | 1 | 7000  |
| 32 | 1129 | 2 | 55 | 2 | 1 | 2 | 3 | 1 | 40000 |
| 33 | 1130 | 2 | 72 | 2 | 1 | 3 | 3 | 1 | 25000 |
| 34 | 1131 | 2 | 40 | 2 | 2 | 1 | 3 | 1 | 20000 |
| 35 | 1132 | 2 | 39 | 1 | 1 | 3 | 1 | 1 | 10000 |
| 36 | 1133 | 2 | 70 | 2 | 1 | 2 | 3 | 1 | 15000 |
| 37 | 1134 | 2 | 50 | 2 | 2 | 1 | 3 | 1 | 15000 |
| 38 | 1135 | 2 | 35 | 1 | 2 | 1 | 4 | 1 | 3000  |
| 39 | 1136 | 2 | 42 | 2 | 1 | 2 | 3 | 1 | 15000 |
| 40 | 1137 | 2 | 50 | 2 | 1 | 4 | 1 | 1 | 7000  |
| 41 | 1138 | 2 | 42 | 2 | 1 | 2 | 3 | 1 | 7000  |
| 42 | 1139 | 2 | 36 | 2 | 2 | 1 | 3 | 1 | 5000  |
| 43 | 1140 | 2 | 55 | 2 | 1 | 1 | 3 | 1 | 10000 |
| 44 | 1141 | 2 | 50 | 1 | 2 | 4 | 1 | 1 | 5000  |
| 45 | 1142 | 2 | 60 | 2 | 1 | 2 | 3 | 1 | 60000 |
| 46 | 1143 | 2 | 45 | 2 | 2 | 2 | 3 | 1 | 10000 |
| 47 | 1144 | 2 | 60 | 1 | 2 | 1 | 4 | 1 | 3000  |
| 48 | 1145 | 2 | 73 | 2 | 2 | 3 | 3 | 1 | 30000 |
| 49 | 1146 | 2 | 90 | 2 | 2 | 2 | 3 | 1 | 4000  |
| 50 | 1147 | 2 | 40 | 2 | 1 | 2 | 3 | 1 | 5000  |
| 51 | 1148 | 2 | 46 | 2 | 1 | 2 | 3 | 1 | 15000 |
| 52 | 1149 | 2 | 56 | 2 | 1 | 1 | 3 | 1 | 15000 |

|    |      |   |    |   |   |   |   |   |       |
|----|------|---|----|---|---|---|---|---|-------|
| 1  |      |   |    |   |   |   |   |   |       |
| 2  | 1150 | 2 | 45 | 2 | 1 | 1 | 3 | 1 | 2000  |
| 3  | 1151 | 2 | 55 | 2 | 1 | 2 | 2 | 1 | 10000 |
| 4  | 1152 | 2 | 42 | 2 | 2 | 2 | 2 | 1 | 10000 |
| 5  | 1153 | 2 | 50 | 2 | 2 | 2 | 3 | 1 | 20000 |
| 6  | 1154 | 2 | 45 | 2 | 2 | 1 | 3 | 1 | 3000  |
| 7  | 1155 | 2 | 42 | 2 | 2 | 2 | 3 | 1 | 30000 |
| 8  | 1156 | 2 | 35 | 2 | 2 | 2 | 3 | 1 | 3000  |
| 9  | 1157 | 2 | 45 | 1 | 2 | 3 | 4 | 1 | 5000  |
| 10 | 1158 | 2 | 42 | 1 | 2 | 4 | 4 | 1 | 10000 |
| 11 | 1159 | 2 | 65 | 2 | 2 | 2 | 3 | 1 | 80000 |
| 12 | 1160 | 2 | 40 | 2 | 2 | 2 | 3 | 1 | 5000  |
| 13 | 1161 | 2 | 55 | 2 | 1 | 1 | 3 | 1 | 10000 |
| 14 | 1162 | 2 | 60 | 1 | 2 | 2 | 2 | 1 | 5000  |
| 15 | 1163 | 2 | 50 | 1 | 2 | 1 | 4 | 1 | 15000 |
| 16 | 1164 | 2 | 47 | 2 | 2 | 1 | 3 | 1 | 15000 |
| 17 | 1165 | 2 | 70 | 1 | 2 | 3 | 4 | 1 | 5000  |
| 18 | 1166 | 2 | 52 | 2 | 1 | 2 | 3 | 1 | 10000 |
| 19 | 1167 | 2 | 40 | 1 | 2 | 3 | 4 | 1 | 20000 |
| 20 | 1168 | 2 | 40 | 2 | 2 | 1 | 3 | 1 | 4000  |
| 21 | 1169 | 2 | 60 | 2 | 2 | 1 | 3 | 1 | 12000 |
| 22 | 1170 | 2 | 46 | 1 | 2 | 4 | 1 | 1 | 15000 |
| 23 | 1171 | 2 | 40 | 1 | 2 | 3 | 4 | 1 | 5000  |
| 24 | 1172 | 2 | 50 | 2 | 1 | 2 | 3 | 1 | 10000 |
| 25 | 1173 | 2 | 50 | 2 | 2 | 1 | 3 | 1 | 8000  |
| 26 | 1174 | 2 | 40 | 2 | 2 | 1 | 3 | 1 | 15000 |
| 27 | 1175 | 2 | 56 | 2 | 1 | 3 | 3 | 1 | 10000 |
| 28 | 1176 | 2 | 60 | 2 | 2 | 2 | 3 | 1 | 3000  |
| 29 | 1177 | 2 | 60 | 1 | 2 | 3 | 2 | 1 | 30000 |
| 30 | 1178 | 2 | 30 | 2 | 2 | 2 | 3 | 1 | 15000 |
| 31 | 1179 | 2 | 40 | 1 | 2 | 3 | 4 | 1 | 3000  |
| 32 | 1180 | 2 | 30 | 2 | 2 | 1 | 3 | 1 | 30000 |
| 33 | 1181 | 2 | 55 | 2 | 2 | 2 | 3 | 1 | 8000  |
| 34 | 1182 | 2 | 60 | 2 | 2 | 1 | 3 | 1 | 20000 |
| 35 | 1183 | 2 | 65 | 2 | 2 | 3 | 3 | 1 | 10000 |
| 36 | 1184 | 2 | 41 | 2 | 2 | 1 | 3 | 1 | 7000  |
| 37 | 1185 | 2 | 60 | 2 | 2 | 2 | 3 | 1 | 6000  |
| 38 | 1186 | 2 | 30 | 2 | 2 | 1 | 3 | 1 | 6000  |
| 39 | 1187 | 2 | 35 | 2 | 2 | 1 | 3 | 1 | 60000 |
| 40 | 1188 | 2 | 56 | 2 | 2 | 1 | 3 | 1 | 30000 |
| 41 | 1189 | 2 | 56 | 2 | 2 | 1 | 3 | 1 | 10000 |
| 42 | 1190 | 2 | 72 | 1 | 2 | 2 | 1 | 1 | 5000  |
| 43 | 1191 | 2 | 65 | 1 | 2 | 3 | 2 | 1 | 20000 |
| 44 | 1192 | 2 | 54 | 1 | 2 | 3 | 1 | 1 | 11500 |
| 45 | 1193 | 2 | 55 | 1 | 2 | 2 | 1 | 1 | 10000 |
| 46 | 1194 | 2 | 45 | 2 | 2 | 2 | 4 | 1 | 10000 |
| 47 | 1195 | 2 | 45 | 1 | 1 | 4 | 1 | 1 | 6000  |
| 48 | 1196 | 2 | 63 | 2 | 2 | 2 | 3 | 1 | 50000 |
| 49 | 1197 | 2 | 70 | 2 | 2 | 1 | 3 | 1 | 40000 |
| 50 | 1198 | 2 | 68 | 2 | 2 | 1 | 3 | 1 | 20000 |
| 51 | 1199 | 2 | 37 | 1 | 1 | 3 | 4 | 1 | 10000 |

|    |      |   |    |   |   |   |   |   |      |
|----|------|---|----|---|---|---|---|---|------|
| 1  |      |   |    |   |   |   |   |   |      |
| 2  | 1200 | 2 | 59 | 2 | 1 | 2 | 4 | 1 | 2500 |
| 3  |      |   |    |   |   |   |   |   |      |
| 4  |      |   |    |   |   |   |   |   |      |
| 5  |      |   |    |   |   |   |   |   |      |
| 6  |      |   |    |   |   |   |   |   |      |
| 7  |      |   |    |   |   |   |   |   |      |
| 8  |      |   |    |   |   |   |   |   |      |
| 9  |      |   |    |   |   |   |   |   |      |
| 10 |      |   |    |   |   |   |   |   |      |
| 11 |      |   |    |   |   |   |   |   |      |
| 12 |      |   |    |   |   |   |   |   |      |
| 13 |      |   |    |   |   |   |   |   |      |
| 14 |      |   |    |   |   |   |   |   |      |
| 15 |      |   |    |   |   |   |   |   |      |
| 16 |      |   |    |   |   |   |   |   |      |
| 17 |      |   |    |   |   |   |   |   |      |
| 18 |      |   |    |   |   |   |   |   |      |
| 19 |      |   |    |   |   |   |   |   |      |
| 20 |      |   |    |   |   |   |   |   |      |
| 21 |      |   |    |   |   |   |   |   |      |
| 22 |      |   |    |   |   |   |   |   |      |
| 23 |      |   |    |   |   |   |   |   |      |
| 24 |      |   |    |   |   |   |   |   |      |
| 25 |      |   |    |   |   |   |   |   |      |
| 26 |      |   |    |   |   |   |   |   |      |
| 27 |      |   |    |   |   |   |   |   |      |
| 28 |      |   |    |   |   |   |   |   |      |
| 29 |      |   |    |   |   |   |   |   |      |
| 30 |      |   |    |   |   |   |   |   |      |
| 31 |      |   |    |   |   |   |   |   |      |
| 32 |      |   |    |   |   |   |   |   |      |
| 33 |      |   |    |   |   |   |   |   |      |
| 34 |      |   |    |   |   |   |   |   |      |
| 35 |      |   |    |   |   |   |   |   |      |
| 36 |      |   |    |   |   |   |   |   |      |
| 37 |      |   |    |   |   |   |   |   |      |
| 38 |      |   |    |   |   |   |   |   |      |
| 39 |      |   |    |   |   |   |   |   |      |
| 40 |      |   |    |   |   |   |   |   |      |
| 41 |      |   |    |   |   |   |   |   |      |
| 42 |      |   |    |   |   |   |   |   |      |
| 43 |      |   |    |   |   |   |   |   |      |
| 44 |      |   |    |   |   |   |   |   |      |
| 45 |      |   |    |   |   |   |   |   |      |
| 46 |      |   |    |   |   |   |   |   |      |
| 47 |      |   |    |   |   |   |   |   |      |
| 48 |      |   |    |   |   |   |   |   |      |
| 49 |      |   |    |   |   |   |   |   |      |
| 50 |      |   |    |   |   |   |   |   |      |
| 51 |      |   |    |   |   |   |   |   |      |
| 52 |      |   |    |   |   |   |   |   |      |
| 53 |      |   |    |   |   |   |   |   |      |
| 54 |      |   |    |   |   |   |   |   |      |
| 55 |      |   |    |   |   |   |   |   |      |
| 56 |      |   |    |   |   |   |   |   |      |
| 57 |      |   |    |   |   |   |   |   |      |
| 58 |      |   |    |   |   |   |   |   |      |
| 59 |      |   |    |   |   |   |   |   |      |
| 60 |      |   |    |   |   |   |   |   |      |

For peer review only

|    | BMI      | Q18_dur_DN | insulin_user | Q20_FBG | Q21_RBG | _current_sn6 | _current_ | PA | use_fitting_f |
|----|----------|------------|--------------|---------|---------|--------------|-----------|----|---------------|
| 1  |          |            |              |         |         |              |           |    |               |
| 2  |          |            |              |         |         |              |           |    |               |
| 3  | 22.22222 | 8          | 2            | 8.9     | 10.9    | 2            | 2         | 2  | 1             |
| 4  | 26.25499 | 2          | 2            | 7.2     | 11.5    | 2            | 2         | 1  | 1             |
| 5  | 25.63117 | 8          | 2            | 6.4     | 10.5    | 2            | 2         | 2  | 1             |
| 6  |          |            |              |         |         |              |           |    |               |
| 7  | 23.55556 | 12         | 2            | 9       | 12      | 2            | 2         | 1  | 1             |
| 8  | 26.57538 | 15         | 1            | 9.8     | 13.5    | 2            | 1         | 1  | 1             |
| 9  | 23.55556 | 11         | 1            | 6.4     | 9.1     | 2            | 2         | 1  | 1             |
| 10 | 24.86395 | 1          | 2            | 5.5     | 8.4     | 2            | 2         | 2  | 1             |
| 11 | 31.73973 | 6          | 1            | 5.7     | 7.8     | 2            | 2         | 2  | 1             |
| 12 |          |            |              |         |         |              |           |    |               |
| 13 | 24       | 20         | 2            | 5.2     | 6.6     | 2            | 1         | 1  | 1             |
| 14 | 29.17489 | 19         | 1            | 7.7     | 12      | 2            | 1         | 2  | 1             |
| 15 | 22.21368 | 11         | 2            | 6.6     | 8.9     | 2            | 1         | 2  | 1             |
| 16 | 22.37034 | 3          | 2            | 6.2     | 11.2    | 2            | 1         | 2  | 1             |
| 17 | 23.82813 | 7          | 2            | 5.5     | 7.8     | 2            | 2         | 1  | 1             |
| 18 | 23.11111 | 14         | 1            | 6.5     | 8.4     | 2            | 2         | 2  | 1             |
| 19 |          |            |              |         |         |              |           |    |               |
| 20 | 36.21228 | 8          | 2            | 7.9     | 8.9     | 2            | 2         | 2  | 1             |
| 21 | 23.55556 | 14         | 1            | 6.3     | 11.5    | 2            | 2         | 2  | 1             |
| 22 | 26.3656  | 13         | 2            | 6.9     | 9.5     | 2            | 2         | 2  | 1             |
| 23 | 21.48438 | 8          | 2            | 3.2     | 11.5    | 2            | 2         | 2  | 1             |
| 24 | 25.91068 | 10         | 2            | 5.8     | 7.2     | 2            | 2         | 1  | 1             |
| 25 | 24.76757 | 2          | 2            | 5.3     | 7.6     | 2            | 1         | 2  | 1             |
| 26 |          |            |              |         |         |              |           |    |               |
| 27 | 25       | 8          | 2            | 7.1     | 14.7    | 2            | 1         | 1  | 1             |
| 28 | 23.8048  | 3          | 1            | 9.7     | 16.9    | 2            | 2         | 1  | 1             |
| 29 | 25.71166 | 15         | 2            | 5.2     | 9.9     | 1            | 2         | 1  | 1             |
| 30 | 23.73996 | 7          | 2            | 9.1     | 11.3    | 2            | 2         | 2  | 1             |
| 31 | 20.80856 | 8          | 2            | 8.5     | 13.6    | 2            | 2         | 2  | 1             |
| 32 | 22.03857 | 2          | 2            | 4.5     | 12.5    | 2            | 2         | 2  | 1             |
| 33 | 24.38653 | 6          | 1            | 5.2     | 9.7     | 1            | 1         | 1  | 1             |
| 34 | 26.12861 | 7          | 2            | 6       | 10.2    | 2            | 2         | 1  | 1             |
| 35 | 22.30815 | 15         | 1            | 7       | 12.7    | 2            | 2         | 2  | 1             |
| 36 | 23.91883 | 3          | 2            | 5.3     | 6.4     | 1            | 1         | 2  | 1             |
| 37 | 24.97399 | 15         | 1            | 4.1     | 7.2     | 2            | 2         | 2  | 2             |
| 38 | 25.81663 | 5          | 2            | 6.6     | 8.6     | 1            | 2         | 2  | 1             |
| 39 | 26.15933 | 19         | 1            | 10      | 18      | 2            | 2         | 1  | 2             |
| 40 | 25.03992 | 13         | 2            | 17.9    | 14.2    | 2            | 2         | 2  | 1             |
| 41 | 20.17715 | 15         | 1            | 10      | 15      | 1            | 2         | 2  | 1             |
| 42 | 24.38237 | 5          | 2            | 6.8     | 13.2    | 2            | 2         | 2  | 1             |
| 43 | 19.00391 | 3          | 2            | 6       | 7.5     | 2            | 2         | 2  | 1             |
| 44 | 28.99931 | 12         | 1            | 4.1     | 7.2     | 2            | 2         | 2  | 1             |
| 45 | 24.14152 | 7          | 1            | 5.9     | 12.5    | 1            | 1         | 1  | 1             |
| 46 | 28.57796 | 12         | 1            | 6.6     | 9.9     | 2            | 1         | 2  | 1             |
| 47 | 23.11111 | 11         | 1            | 6.9     | 10.7    | 2            | 2         | 1  | 1             |
| 48 | 22.10029 | 12         | 1            | 5.8     | 7.2     | 2            | 2         | 2  | 1             |
| 49 | 25.71166 | 10         | 2            | 6.2     | 8.1     | 2            | 1         | 2  | 1             |
| 50 | 25.91068 | 5          | 2            | 4.2     | 9.6     | 1            | 2         | 2  | 2             |
| 51 | 25.63117 | 2          | 2            | 5.9     | 7.7     | 1            | 2         | 1  | 1             |
| 52 | 19.95935 | 17         | 1            | 5       | 8.9     | 2            | 1         | 2  | 1             |
| 53 | 24.53897 | 21         | 1            | 5.9     | 11.1    | 2            | 2         | 2  | 1             |
| 54 | 24.97399 | 16         | 1            | 8.8     | 16      | 1            | 1         | 2  | 1             |
| 55 | 28.959   | 12         | 2            | 5.2     | 6.9     | 2            | 1         | 2  | 1             |

|    |          |    |   |       |      |   |   |   |   |
|----|----------|----|---|-------|------|---|---|---|---|
| 1  |          |    |   |       |      |   |   |   |   |
| 2  | 25.45236 | 6  | 2 | 6.9   | 8.6  | 2 | 2 | 1 | 1 |
| 3  | 28.51563 | 11 | 1 | 6.8   | 11.2 | 2 | 2 | 1 | 1 |
| 4  | 32.88919 | 7  | 2 | 7     | 8.5  | 2 | 2 | 2 | 1 |
| 5  | 26.57313 | 6  | 2 | 6.8   | 8.9  | 2 | 2 | 2 | 1 |
| 6  | 23.55556 | 14 | 1 | 6.7   | 11.9 | 2 | 2 | 2 | 1 |
| 7  | 26.3656  | 7  | 2 | 6.911 | 11.1 | 2 | 2 | 2 | 1 |
| 8  | 23.4375  | 15 | 2 | 7.2   | 8.3  | 2 | 2 | 2 | 2 |
| 9  | 22.03173 | 26 | 1 | 6.2   | 7.2  | 2 | 2 | 2 | 1 |
| 10 | 27.11111 | 23 | 2 | 9     | 13   | 2 | 2 | 2 | 1 |
| 11 | 21.875   | 24 | 2 | 6.7   | 13   | 2 | 2 | 2 | 1 |
| 12 | 29.38476 | 5  | 2 | 6     | 10.5 | 2 | 2 | 1 | 1 |
| 13 | 30.07813 | 3  | 2 | 5.9   | 10.2 | 2 | 2 | 2 | 1 |
| 14 | 22.03857 | 9  | 1 | 5.1   | 8.2  | 2 | 2 | 1 | 1 |
| 15 | 27.91552 | 10 | 2 | 6.4   | 13.9 | 1 | 2 | 2 | 1 |
| 16 | 24.21875 | 20 | 2 | 5.7   | 9.8  | 2 | 1 | 2 | 1 |
| 17 | 17.99015 | 25 | 1 | 6     | 11   | 1 | 1 | 1 | 1 |
| 18 | 27.34375 | 5  | 2 | 5.8   | 9.9  | 2 | 2 | 1 | 1 |
| 19 | 32.46618 | 20 | 2 | 9.3   | 9.9  | 2 | 2 | 2 | 1 |
| 20 | 24.00549 | 3  | 2 | 6.7   | 10.3 | 2 | 1 | 2 | 1 |
| 21 | 24.52435 | 8  | 2 | 8.2   | 11.5 | 2 | 1 | 1 | 1 |
| 22 | 26.29758 | 25 | 2 | 6.4   | 8.4  | 1 | 2 | 1 | 1 |
| 23 | 24.39482 | 1  | 2 | 6.8   | 11   | 2 | 1 | 2 | 1 |
| 24 | 24.79667 | 1  | 1 | 5.2   | 8    | 2 | 2 | 2 | 1 |
| 25 | 23.11111 | 10 | 1 | 8.1   | 12   | 2 | 2 | 2 | 1 |
| 26 | 37.53049 | 1  | 2 | 4.9   | 6.2  | 2 | 2 | 2 | 1 |
| 27 | 22.22222 | 3  | 2 | 5.8   | 8    | 2 | 1 | 2 | 1 |
| 28 | 23.11111 | 1  | 2 | 7.2   | 11.2 | 2 | 2 | 2 | 1 |
| 29 | 24.64665 | 12 | 2 | 8.8   | 14.4 | 2 | 1 | 2 | 1 |
| 30 | 30.29778 | 10 | 2 | 5.3   | 7.2  | 2 | 2 | 2 | 1 |
| 31 | 27.8488  | 10 | 1 | 6.5   | 10.8 | 2 | 2 | 1 | 1 |
| 32 | 22.82688 | 10 | 1 | 7.4   | 8.4  | 2 | 2 | 1 | 2 |
| 33 | 25.5102  | 12 | 2 | 6.4   | 7.8  | 2 | 1 | 1 | 1 |
| 34 | 25.78125 | 1  | 2 | 6.2   | 7.5  | 2 | 2 | 2 | 1 |
| 35 | 28.06894 | 5  | 2 | 7.4   | 13.5 | 2 | 2 | 1 | 1 |
| 36 | 22.0741  | 15 | 2 | 6.7   | 7.4  | 2 | 2 | 2 | 2 |
| 37 | 23.42237 | 3  | 2 | 6.9   | 9.2  | 2 | 2 | 1 | 2 |
| 38 | 28.93407 | 6  | 2 | 7     | 10.8 | 2 | 2 | 1 | 1 |
| 39 | 21.64127 | 2  | 2 | 7.2   | 10.7 | 2 | 2 | 2 | 1 |
| 40 | 26.17188 | 8  | 2 | 6.6   | 8.1  | 2 | 1 | 1 | 1 |
| 41 | 29.35752 | 5  | 2 | 6.8   | 12.1 | 2 | 2 | 2 | 1 |
| 42 | 27.20961 | 2  | 2 | 5.1   | 6.1  | 2 | 2 | 1 | 1 |
| 43 | 25.56611 | 5  | 2 | 6.6   | 7.6  | 2 | 2 | 1 | 1 |
| 44 | 23.8048  | 5  | 2 | 6.1   | 11.6 | 2 | 2 | 1 | 1 |
| 45 | 24.00549 | 10 | 1 | 6     | 10.4 | 2 | 2 | 2 | 2 |
| 46 | 23.73996 | 16 | 1 | 8.3   | 10.8 | 2 | 2 | 1 | 1 |
| 47 | 29.08613 | 5  | 2 | 6.4   | 8.8  | 2 | 2 | 2 | 1 |
| 48 | 25.91068 | 8  | 2 | 7.2   | 13.7 | 2 | 1 | 1 | 1 |
| 49 | 17.77778 | 1  | 2 | 7.2   | 11.9 | 2 | 2 | 2 | 1 |
| 50 | 24.30462 | 1  | 2 | 7.9   | 13   | 2 | 2 | 2 | 1 |
| 51 | 25.5102  | 1  | 2 | 8.1   | 10.1 | 2 | 2 | 1 | 2 |



|    |          |    |   |      |      |   |   |   |   |
|----|----------|----|---|------|------|---|---|---|---|
| 1  |          |    |   |      |      |   |   |   |   |
| 2  | 24.97399 | 6  | 2 | 9.2  | 11   | 2 | 2 | 1 | 1 |
| 3  | 28.98114 | 2  | 1 | 11.6 | 14.2 | 2 | 2 | 2 | 1 |
| 4  | 28.30385 | 19 | 1 | 6.2  | 7.9  | 2 | 2 | 2 | 1 |
| 5  | 27.20961 | 2  | 2 | 4.3  | 4.9  | 2 | 1 | 2 | 1 |
| 6  | 27.76621 | 5  | 2 | 6    | 10   | 2 | 2 | 1 | 1 |
| 7  | 20.3428  | 4  | 2 | 11   | 13   | 2 | 1 | 2 | 1 |
| 8  | 27.99302 | 7  | 2 | 8    | 9    | 2 | 2 | 1 | 1 |
| 9  | 23.23346 | 2  | 2 | 7    | 10   | 2 | 2 | 1 | 1 |
| 10 | 26.27135 | 2  | 2 | 8    | 9    | 2 | 2 | 1 | 1 |
| 11 | 19.43635 | 5  | 2 | 9    | 14   | 2 | 2 | 1 | 1 |
| 12 | 28.06894 | 20 | 1 | 5    | 9    | 2 | 2 | 2 | 1 |
| 13 | 25.67452 | 8  | 2 | 4    | 7    | 2 | 2 | 2 | 1 |
| 14 | 32.89474 | 14 | 1 | 7    | 9    | 2 | 1 | 1 | 1 |
| 15 | 29.67495 | 2  | 2 | 6.5  | 7    | 2 | 2 | 2 | 1 |
| 16 | 32.51821 | 7  | 2 | 8    | 10   | 2 | 2 | 2 | 1 |
| 17 | 26.83518 | 3  | 2 | 7    | 13   | 2 | 1 | 2 | 1 |
| 18 | 27.70083 | 15 | 2 | 6    | 9    | 2 | 1 | 2 | 1 |
| 19 | 24.83576 | 3  | 2 | 7    | 14   | 2 | 2 | 1 | 1 |
| 20 | 24.76757 | 19 | 1 | 7    | 12   | 2 | 2 | 1 | 1 |
| 21 | 24.65303 | 20 | 1 | 7    | 9    | 2 | 1 | 2 | 1 |
| 22 | 25.20398 | 12 | 2 | 7    | 10   | 2 | 2 | 1 | 1 |
| 23 | 29.34129 | 2  | 2 | 6    | 8    | 2 | 1 | 2 | 1 |
| 24 | 27.55556 | 10 | 1 | 8    | 4    | 2 | 2 | 2 | 1 |
| 25 | 24       | 5  | 1 | 7    | 6    | 2 | 2 | 1 | 1 |
| 26 | 23.42209 | 20 | 2 | 8    | 11   | 2 | 2 | 2 | 1 |
| 27 | 26.40236 | 16 | 1 | 7    | 10   | 2 | 1 | 2 | 1 |
| 28 | 29.43213 | 2  | 2 | 6    | 8    | 2 | 2 | 2 | 1 |
| 29 | 25.55885 | 8  | 2 | 6    | 14   | 2 | 2 | 2 | 1 |
| 30 | 22.93975 | 14 | 2 | 13   | 17   | 2 | 2 | 2 | 1 |
| 31 | 29.08613 | 3  | 2 | 11   | 16   | 2 | 1 | 2 | 1 |
| 32 | 24.21875 | 4  | 2 | 4    | 7    | 2 | 2 | 1 | 1 |
| 33 | 21.36752 | 15 | 1 | 10   | 17   | 2 | 2 | 1 | 2 |
| 34 | 29.51594 | 6  | 2 | 8    | 11   | 2 | 1 | 1 | 1 |
| 35 | 18.75    | 1  | 2 | 5    | 7    | 2 | 2 | 1 | 1 |
| 36 | 22.0741  | 2  | 2 | 6    | 14   | 2 | 2 | 1 | 1 |
| 37 | 33.28402 | 10 | 2 | 12   | 14   | 2 | 2 | 1 | 1 |
| 38 | 26.83518 | 17 | 2 | 8    | 11   | 2 | 2 | 1 | 1 |
| 39 | 21.1109  | 5  | 2 | 9    | 10   | 2 | 2 | 2 | 1 |
| 40 | 26.22269 | 20 | 1 | 7    | 10   | 2 | 2 | 1 | 1 |
| 41 | 30.49353 | 9  | 2 | 8    | 11   | 2 | 1 | 2 | 1 |
| 42 | 27.55556 | 17 | 2 | 9    | 12   | 2 | 2 | 2 | 1 |
| 43 | 27.18163 | 6  | 2 | 13   | 18   | 2 | 2 | 2 | 1 |
| 44 | 27.00617 | 5  | 2 | 7    | 9    | 2 | 2 | 2 | 1 |
| 45 | 26.03749 | 10 | 2 | 4    | 14   | 2 | 2 | 1 | 2 |
| 46 | 24       | 2  | 2 | 7    | 9    | 2 | 2 | 2 | 2 |
| 47 | 28.76187 | 16 | 2 | 10   | 11   | 2 | 2 | 1 | 1 |
| 48 | 23.83301 | 1  | 2 | 6    | 9    | 2 | 2 | 2 | 1 |
| 49 | 23.83301 | 1  | 2 | 5    | 6    | 2 | 2 | 2 | 1 |
| 50 | 23.8054  | 15 | 2 | 9    | 10   | 2 | 2 | 2 | 1 |
| 51 | 22.89282 | 5  | 1 | 9    | 11   | 2 | 2 | 2 | 1 |

|    |          |    |   |     |     |   |   |   |   |
|----|----------|----|---|-----|-----|---|---|---|---|
| 1  |          |    |   |     |     |   |   |   |   |
| 2  | 32       | 4  | 2 | 10  | 12  | 2 | 2 | 1 | 1 |
| 3  | 23.87512 | 1  | 2 | 6.4 | 7.2 | 2 | 2 | 1 | 1 |
| 4  | 29.09428 | 5  | 2 | 6   | 10  | 2 | 2 | 2 | 1 |
| 5  | 26.29849 | 18 | 2 | 9   | 10  | 2 | 2 | 2 | 1 |
| 6  | 29.41744 | 17 | 2 | 11  | 12  | 2 | 2 | 2 | 2 |
| 7  | 22.50693 | 6  | 2 | 9   | 16  | 2 | 2 | 1 | 1 |
| 8  | 24.31412 | 5  | 2 | 7   | 11  | 2 | 2 | 2 | 1 |
| 9  | 28.13366 | 17 | 2 | 14  | 24  | 2 | 2 | 2 | 1 |
| 10 | 33.77778 | 1  | 2 | 6   | 8   | 2 | 1 | 2 | 2 |
| 11 | 30.13148 | 5  | 2 | 7   | 13  | 2 | 1 | 2 | 1 |
| 12 | 31.07968 | 1  | 2 | 7   | 11  | 2 | 2 | 1 | 1 |
| 13 | 24.74745 | 8  | 2 | 5   | 6   | 2 | 2 | 2 | 1 |
| 14 | 23.8054  | 5  | 2 | 14  | 19  | 2 | 2 | 1 | 1 |
| 15 | 20.44444 | 1  | 2 | 5   | 9   | 2 | 2 | 1 | 1 |
| 16 | 29.86496 | 1  | 2 | 8   | 11  | 2 | 1 | 2 | 1 |
| 17 | 23.61275 | 9  | 2 | 13  | 17  | 2 | 1 | 2 | 1 |
| 18 | 28.76187 | 7  | 1 | 11  | 14  | 2 | 1 | 2 | 1 |
| 19 | 33.7325  | 4  | 2 | 6   | 8   | 2 | 1 | 2 | 1 |
| 20 | 31.90092 | 9  | 1 | 6   | 10  | 2 | 2 | 2 | 1 |
| 21 | 23.95123 | 12 | 2 | 11  | 13  | 2 | 1 | 2 | 1 |
| 22 | 21.20845 | 9  | 2 | 12  | 13  | 2 | 1 | 2 | 1 |
| 23 | 28.88889 | 1  | 2 | 6   | 11  | 2 | 2 | 1 | 2 |
| 24 | 29.26007 | 25 | 2 | 14  | 22  | 2 | 2 | 2 | 2 |
| 25 | 33.32756 | 16 | 2 | 7   | 12  | 2 | 2 | 1 | 2 |
| 26 | 31.5011  | 7  | 2 | 3   | 12  | 2 | 2 | 1 | 1 |
| 27 | 21.33821 | 3  | 2 | 7   | 8   | 2 | 2 | 2 | 1 |
| 28 | 25.10957 | 8  | 2 | 6   | 7   | 2 | 2 | 1 | 1 |
| 29 | 22.18364 | 16 | 2 | 9   | 16  | 2 | 2 | 1 | 1 |
| 30 | 28.88889 | 10 | 2 | 8   | 12  | 2 | 2 | 2 | 1 |
| 31 | 20.70082 | 11 | 2 | 5   | 6   | 2 | 2 | 1 | 1 |
| 32 | 22.67995 | 12 | 2 | 9   | 14  | 2 | 2 | 2 | 1 |
| 33 | 25.5367  | 30 | 2 | 14  | 16  | 2 | 1 | 2 | 1 |
| 34 | 27.29322 | 8  | 2 | 8   | 9   | 2 | 2 | 1 | 1 |
| 35 | 26.95313 | 2  | 2 | 6   | 7   | 2 | 2 | 1 | 2 |
| 36 | 27.55556 | 7  | 2 | 7   | 9   | 2 | 2 | 2 | 2 |
| 37 | 23.92242 | 22 | 2 | 8   | 18  | 2 | 2 | 1 | 2 |
| 38 | 21.21914 | 1  | 2 | 8   | 10  | 2 | 2 | 2 | 1 |
| 39 | 28       | 8  | 2 | 9   | 11  | 2 | 2 | 2 | 1 |
| 40 | 25.5367  | 25 | 2 | 6   | 8   | 2 | 2 | 1 | 2 |
| 41 | 25.80221 | 17 | 2 | 20  | 22  | 2 | 2 | 2 | 1 |
| 42 | 34.29355 | 2  | 1 | 10  | 12  | 2 | 2 | 1 | 2 |
| 43 | 25.5367  | 6  | 2 | 10  | 11  | 2 | 1 | 2 | 1 |
| 44 | 26.66667 | 5  | 2 | 6   | 16  | 2 | 2 | 1 | 1 |
| 45 | 24.65483 | 12 | 2 | 7   | 10  | 2 | 2 | 2 | 1 |
| 46 | 32.87311 | 9  | 1 | 8   | 12  | 2 | 2 | 2 | 1 |
| 47 | 29.77778 | 4  | 2 | 6   | 11  | 2 | 2 | 2 | 2 |
| 48 | 32.46614 | 7  | 2 | 5   | 9   | 2 | 2 | 1 | 1 |
| 49 | 32.29787 | 5  | 2 | 8   | 10  | 2 | 1 | 2 | 1 |
| 50 | 24.38653 | 4  | 2 | 7   | 8   | 2 | 2 | 1 | 2 |
| 51 | 33.32756 | 1  | 2 | 5   | 8   | 2 | 2 | 2 | 1 |

|    |          |    |   |      |      |   |   |   |   |
|----|----------|----|---|------|------|---|---|---|---|
| 1  |          |    |   |      |      |   |   |   |   |
| 2  | 21.64127 | 8  | 1 | 9    | 12   | 2 | 2 | 2 | 1 |
| 3  | 25.33333 | 6  | 2 | 17.4 | 8.4  | 2 | 1 | 2 | 2 |
| 4  | 26.47918 | 5  | 2 | 11.8 | 14.5 | 2 | 2 | 2 | 2 |
| 5  | 30.29778 | 1  | 2 | 5.6  | 13   | 2 | 2 | 1 | 2 |
| 6  | 24.55775 | 5  | 2 | 7.9  | 9.1  | 2 | 2 | 1 | 1 |
| 7  | 29.27796 | 20 | 2 | 9.4  | 12.5 | 2 | 2 | 2 | 1 |
| 8  | 21.63115 | 3  | 1 | 9    | 11.2 | 2 | 2 | 2 | 1 |
| 9  | 23.8054  | 3  | 2 | 8.7  | 13.3 | 2 | 2 | 2 | 2 |
| 10 | 24.03441 | 8  | 1 | 10   | 15   | 2 | 1 | 2 | 1 |
| 11 | 24.03441 | 5  | 1 | 13.3 | 24   | 2 | 2 | 1 | 1 |
| 12 | 27.11058 | 4  | 1 | 7.6  | 9    | 2 | 2 | 1 | 1 |
| 13 | 25.14861 | 3  | 2 | 6    | 8    | 2 | 2 | 2 | 2 |
| 14 | 28.76397 | 1  | 2 | 5    | 7    | 2 | 2 | 1 | 1 |
| 15 | 21.56455 | 1  | 2 | 6    | 8    | 2 | 2 | 2 | 1 |
| 16 | 23.87512 | 15 | 2 | 6    | 10   | 2 | 2 | 1 | 1 |
| 17 | 23.79536 | 2  | 1 | 4    | 9    | 2 | 2 | 2 | 1 |
| 18 | 26.95313 | 1  | 2 | 9.5  | 17   | 2 | 2 | 2 | 1 |
| 19 | 32.8125  | 12 | 1 | 7    | 4    | 2 | 2 | 2 | 1 |
| 20 | 22.3403  | 1  | 2 | 6    | 11   | 2 | 2 | 1 | 1 |
| 21 | 26.95313 | 10 | 1 | 14   | 22   | 2 | 2 | 1 | 1 |
| 22 | 22.26563 | 5  | 1 | 11   | 14   | 2 | 2 | 1 | 1 |
| 23 | 20.68515 | 11 | 2 | 6    | 7    | 2 | 2 | 1 | 2 |
| 24 | 28.04967 | 1  | 2 | 6    | 8    | 2 | 2 | 1 | 1 |
| 25 | 25.5367  | 15 | 1 | 17   | 30   | 2 | 2 | 1 | 1 |
| 26 | 26.7094  | 16 | 1 | 6    | 17   | 2 | 2 | 1 | 1 |
| 27 | 26.66667 | 20 | 1 | 8    | 16   | 2 | 2 | 1 | 1 |
| 28 | 23.22543 | 1  | 2 | 8    | 14   | 2 | 2 | 1 | 1 |
| 29 | 26.57313 | 1  | 2 | 7    | 16   | 2 | 2 | 1 | 1 |
| 30 | 22.03173 | 1  | 2 | 6    | 19.9 | 1 | 2 | 1 | 1 |
| 31 | 26.67276 | 3  | 2 | 8    | 14   | 2 | 2 | 2 | 1 |
| 32 | 30.07813 | 1  | 2 | 6    | 10   | 1 | 2 | 2 | 1 |
| 33 | 26.17188 | 4  | 2 | 5    | 9    | 2 | 2 | 1 | 1 |
| 34 | 25.68956 | 12 | 2 | 9    | 14   | 1 | 2 | 1 | 1 |
| 35 | 22.30815 | 3  | 2 | 12   | 19   | 1 | 2 | 2 | 1 |
| 36 | 24.50895 | 4  | 2 | 5    | 9    | 2 | 2 | 1 | 1 |
| 37 | 21.875   | 3  | 2 | 7    | 9    | 2 | 2 | 2 | 1 |
| 38 | 26.43807 | 3  | 2 | 7    | 10   | 2 | 2 | 2 | 1 |
| 39 | 26.17188 | 10 | 2 | 8    | 8    | 2 | 2 | 1 | 1 |
| 40 | 18.55288 | 22 | 2 | 9    | 12   | 2 | 2 | 1 | 2 |
| 41 | 25.39063 | 7  | 2 | 5    | 6    | 2 | 2 | 2 | 1 |
| 42 | 25.63117 | 14 | 2 | 6    | 13   | 1 | 1 | 1 | 1 |
| 43 | 25.03992 | 4  | 2 | 9    | 14   | 2 | 2 | 2 | 1 |
| 44 | 21.56455 | 3  | 2 | 6    | 7    | 2 | 2 | 1 | 1 |
| 45 | 21.19274 | 8  | 2 | 12   | 18   | 1 | 1 | 2 | 1 |
| 46 | 29.32099 | 10 | 2 | 7    | 9    | 2 | 2 | 2 | 1 |
| 47 | 26.83518 | 5  | 2 | 8    | 12   | 2 | 2 | 2 | 1 |
| 48 | 27.00513 | 8  | 1 | 14   | 21   | 1 | 2 | 2 | 1 |
| 49 | 25.40282 | 2  | 2 | 13   | 17   | 2 | 1 | 2 | 1 |
| 50 | 25.03992 | 15 | 2 | 7    | 10   | 2 | 2 | 2 | 1 |
| 51 | 23.8054  | 3  | 2 | 8.7  | 13.3 | 2 | 2 | 2 | 2 |

|    |          |    |   |      |      |   |   |   |   |
|----|----------|----|---|------|------|---|---|---|---|
| 1  |          |    |   |      |      |   |   |   |   |
| 2  | 24.03441 | 8  | 1 | 10   | 15   | 2 | 1 | 2 | 1 |
| 3  | 24.03441 | 5  | 1 | 13.3 | 24   | 2 | 2 | 1 | 1 |
| 4  | 27.11058 | 4  | 1 | 7.6  | 9    | 2 | 2 | 1 | 1 |
| 5  | 25.14861 | 3  | 2 | 6    | 8    | 2 | 2 | 2 | 2 |
| 6  | 28.76397 | 1  | 2 | 5    | 7    | 2 | 2 | 1 | 1 |
| 7  | 21.56455 | 1  | 2 | 6    | 8    | 2 | 2 | 2 | 1 |
| 8  | 23.87512 | 15 | 2 | 6    | 10   | 2 | 2 | 1 | 1 |
| 9  | 23.79536 | 2  | 1 | 4    | 8    | 2 | 2 | 2 | 1 |
| 10 | 26.95313 | 1  | 2 | 9.5  | 17   | 2 | 2 | 2 | 1 |
| 11 | 32.8125  | 12 | 1 | 7    | 9    | 2 | 2 | 2 | 1 |
| 12 | 24.03441 | 8  | 1 | 10   | 15   | 2 | 1 | 2 | 1 |
| 13 | 24.03441 | 5  | 1 | 13.3 | 24   | 2 | 2 | 1 | 1 |
| 14 | 27.11058 | 4  | 1 | 7.6  | 9    | 2 | 2 | 1 | 1 |
| 15 | 25.14861 | 3  | 2 | 6    | 8    | 2 | 2 | 2 | 2 |
| 16 | 28.76397 | 1  | 2 | 5    | 7    | 2 | 2 | 1 | 1 |
| 17 | 21.56455 | 1  | 2 | 6    | 8    | 2 | 2 | 2 | 1 |
| 18 | 23.87512 | 15 | 2 | 6    | 10   | 2 | 2 | 1 | 1 |
| 19 | 23.79536 | 2  | 1 | 4    | 5    | 2 | 2 | 2 | 1 |
| 20 | 26.95313 | 1  | 2 | 9.5  | 17   | 2 | 2 | 2 | 1 |
| 21 | 32.8125  | 12 | 2 | 7    | 4    | 2 | 2 | 2 | 1 |
| 22 | 22.3403  | 1  | 2 | 6    | 11   | 2 | 2 | 1 | 1 |
| 23 | 26.63892 | 4  | 1 | 10   | 18   | 2 | 1 | 1 | 1 |
| 24 | 32.88889 | 10 | 1 | 11   | 13   | 2 | 2 | 1 | 1 |
| 25 | 22.15102 | 3  | 2 | 9    | 13   | 2 | 2 | 1 | 1 |
| 26 | 23.29072 | 4  | 2 | 15   | 18   | 2 | 1 | 1 | 1 |
| 27 | 24.59491 | 10 | 2 | 10   | 11   | 2 | 1 | 1 | 1 |
| 28 | 30.29778 | 15 | 1 | 9    | 13   | 2 | 1 | 1 | 1 |
| 29 | 21.21832 | 4  | 1 | 10   | 18   | 2 | 1 | 1 | 1 |
| 30 | 30.22222 | 4  | 1 | 7    | 13   | 2 | 2 | 2 | 1 |
| 31 | 22.94213 | 3  | 2 | 9    | 13   | 2 | 2 | 1 | 1 |
| 32 | 32.08944 | 12 | 1 | 6    | 16   | 2 | 1 | 1 | 1 |
| 33 | 28.99931 | 10 | 2 | 4    | 10   | 2 | 2 | 2 | 1 |
| 34 | 27.97068 | 8  | 2 | 9    | 13   | 2 | 1 | 1 | 1 |
| 35 | 24.14152 | 4  | 1 | 10   | 18   | 2 | 1 | 1 | 1 |
| 36 | 29.33333 | 7  | 1 | 5    | 7    | 2 | 2 | 1 | 1 |
| 37 | 24.14152 | 6  | 2 | 7    | 12   | 2 | 2 | 1 | 1 |
| 38 | 23.29072 | 4  | 2 | 15   | 18   | 2 | 1 | 1 | 1 |
| 39 | 24.59491 | 10 | 2 | 10   | 11   | 2 | 1 | 1 | 1 |
| 40 | 25.33333 | 6  | 2 | 17.4 | 8.4  | 2 | 1 | 2 | 2 |
| 41 | 26.47918 | 5  | 2 | 11.8 | 14.5 | 2 | 2 | 2 | 2 |
| 42 | 30.29778 | 1  | 2 | 5.6  | 13   | 2 | 2 | 1 | 2 |
| 43 | 24.55775 | 5  | 2 | 7.9  | 9.1  | 2 | 2 | 1 | 1 |
| 44 | 29.27796 | 20 | 1 | 9.4  | 12.5 | 2 | 2 | 2 | 1 |
| 45 | 21.63115 | 3  | 1 | 9    | 11.2 | 2 | 2 | 2 | 1 |
| 46 | 23.8054  | 3  | 2 | 8.7  | 13.3 | 2 | 2 | 2 | 2 |
| 47 | 24.03441 | 8  | 1 | 10   | 15   | 2 | 1 | 2 | 1 |
| 48 | 27.82931 | 7  | 2 | 5    | 9    | 2 | 2 | 1 | 1 |
| 49 | 27.11058 | 4  | 1 | 7.6  | 9    | 2 | 2 | 1 | 1 |
| 50 | 25.14861 | 3  | 2 | 6    | 8    | 2 | 2 | 2 | 2 |
| 51 | 28.76397 | 1  | 2 | 5    | 7    | 2 | 2 | 1 | 1 |

|    |          |    |   |    |    |   |   |   |   |
|----|----------|----|---|----|----|---|---|---|---|
| 1  |          |    |   |    |    |   |   |   |   |
| 2  | 18.96193 | 15 | 1 | 6  | 8  | 2 | 2 | 2 | 1 |
| 3  | 27.40766 | 3  | 2 | 7  | 14 | 2 | 1 | 1 | 2 |
| 4  | 21.36752 | 1  | 2 | 7  | 8  | 1 | 2 | 1 | 1 |
| 5  | 24.60938 | 2  | 2 | 8  | 10 | 2 | 1 | 1 | 1 |
| 6  | 27.81588 | 3  | 1 | 8  | 16 | 2 | 1 | 1 | 1 |
| 7  | 26.04167 | 10 | 1 | 7  | 8  | 2 | 1 | 2 | 1 |
| 8  | 22.64087 | 4  | 2 | 8  | 16 | 2 | 2 | 2 | 1 |
| 9  | 25.39022 | 1  | 2 | 8  | 10 | 2 | 2 | 1 | 1 |
| 10 | 42.34405 | 6  | 1 | 7  | 9  | 2 | 2 | 1 | 1 |
| 11 | 24.65483 | 10 | 1 | 9  | 19 | 2 | 2 | 1 | 1 |
| 12 | 24.11265 | 2  | 2 | 7  | 8  | 2 | 2 | 2 | 1 |
| 13 | 24.24392 | 7  | 1 | 7  | 16 | 2 | 1 | 1 | 1 |
| 14 | 24.39482 | 5  | 2 | 6  | 10 | 2 | 2 | 2 | 1 |
| 15 | 27.23922 | 4  | 2 | 8  | 13 | 2 | 2 | 2 | 1 |
| 16 | 28.45293 | 6  | 2 | 6  | 11 | 2 | 2 | 2 | 1 |
| 17 | 26.04005 | 1  | 2 | 7  | 11 | 2 | 2 | 1 | 1 |
| 18 | 19.72387 | 6  | 2 | 14 | 17 | 2 | 2 | 2 | 2 |
| 19 | 26.52392 | 3  | 2 | 10 | 14 | 2 | 1 | 1 | 1 |
| 20 | 21.91381 | 6  | 1 | 11 | 16 | 2 | 2 | 2 | 1 |
| 21 | 24.24392 | 3  | 2 | 9  | 11 | 2 | 2 | 2 | 1 |
| 22 | 28.45293 | 14 | 1 | 6  | 9  | 2 | 1 | 2 | 1 |
| 23 | 28.3771  | 24 | 2 | 9  | 11 | 2 | 2 | 1 | 1 |
| 24 | 28.617   | 2  | 2 | 11 | 17 | 2 | 2 | 1 | 1 |
| 25 | 27.19179 | 6  | 2 | 7  | 11 | 2 | 2 | 2 | 2 |
| 26 | 25.87858 | 1  | 2 | 5  | 9  | 2 | 2 | 2 | 1 |
| 27 | 31.34645 | 1  | 2 | 13 | 23 | 2 | 2 | 2 | 1 |
| 28 | 34.72222 | 10 | 2 | 8  | 14 | 2 | 1 | 2 | 1 |
| 29 | 23.83301 | 14 | 2 | 7  | 11 | 2 | 2 | 1 | 1 |
| 30 | 29.89969 | 12 | 1 | 7  | 16 | 2 | 2 | 2 | 1 |
| 31 | 24.67702 | 11 | 1 | 6  | 12 | 1 | 2 | 2 | 1 |
| 32 | 29.27796 | 9  | 2 | 7  | 14 | 2 | 1 | 1 | 1 |
| 33 | 18.02596 | 1  | 2 | 7  | 8  | 1 | 2 | 1 | 1 |
| 34 | 25.1559  | 16 | 2 | 7  | 12 | 1 | 1 | 1 | 1 |
| 35 | 25.33333 | 1  | 2 | 7  | 8  | 2 | 2 | 1 | 1 |
| 36 | 23.82813 | 2  | 2 | 4  | 10 | 2 | 2 | 1 | 1 |
| 37 | 29.33333 | 1  | 2 | 12 | 20 | 2 | 2 | 1 | 1 |
| 38 | 23.33768 | 6  | 1 | 9  | 10 | 2 | 1 | 1 | 1 |
| 39 | 32.71862 | 5  | 1 | 9  | 11 | 2 | 2 | 1 | 1 |
| 40 | 22.60026 | 4  | 1 | 5  | 11 | 2 | 2 | 1 | 1 |
| 41 | 24.03461 | 2  | 2 | 5  | 10 | 2 | 2 | 1 | 1 |
| 42 | 24.03441 | 1  | 2 | 6  | 16 | 2 | 1 | 1 | 1 |
| 43 | 34.31953 | 1  | 1 | 7  | 8  | 2 | 2 | 1 | 1 |
| 44 | 28.67263 | 16 | 1 | 13 | 15 | 2 | 2 | 1 | 1 |
| 45 | 28.93519 | 8  | 1 | 11 | 14 | 2 | 2 | 1 | 1 |
| 46 | 32.31096 | 15 | 2 | 6  | 8  | 2 | 2 | 1 | 1 |
| 47 | 23.04688 | 18 | 1 | 9  | 11 | 2 | 2 | 2 | 1 |
| 48 | 24.22145 | 2  | 2 | 6  | 7  | 1 | 1 | 2 | 1 |
| 49 | 20.95717 | 1  | 2 | 7  | 8  | 2 | 2 | 2 | 1 |
| 50 | 23.62445 | 4  | 1 | 6  | 8  | 1 | 2 | 2 | 1 |
| 51 | 30.38194 | 10 | 2 | 5  | 9  | 2 | 2 | 2 | 1 |

|    |          |    |   |      |      |   |   |   |   |
|----|----------|----|---|------|------|---|---|---|---|
| 1  |          |    |   |      |      |   |   |   |   |
| 2  | 32.46753 | 2  | 2 | 5    | 9    | 2 | 2 | 2 | 1 |
| 3  | 18.36547 | 5  | 2 | 5.5  | 8    | 2 | 2 | 2 | 1 |
| 4  | 23.30668 | 10 | 1 | 13.4 | 20   | 2 | 2 | 2 | 1 |
| 5  | 23.87543 | 20 | 2 | 8    | 14   | 2 | 2 | 2 | 1 |
| 6  | 23.87512 | 1  | 1 | 7    | 11   | 2 | 2 | 2 | 1 |
| 7  | 24.91077 | 9  | 1 | 6    | 8    | 2 | 2 | 2 | 1 |
| 8  | 21.92613 | 7  | 1 | 7    | 9    | 2 | 2 | 2 | 1 |
| 9  | 37.10575 | 18 | 1 | 8    | 12   | 2 | 2 | 2 | 1 |
| 10 | 30.48338 | 5  | 2 | 5    | 7    | 2 | 2 | 2 | 1 |
| 11 | 25.87606 | 15 | 2 | 6    | 11   | 2 | 2 | 2 | 1 |
| 12 | 23.1911  | 17 | 1 | 8    | 11   | 2 | 2 | 2 | 2 |
| 13 | 31.55556 | 3  | 2 | 9    | 14   | 2 | 2 | 2 | 1 |
| 14 | 27.63037 | 20 | 1 | 8    | 11   | 2 | 2 | 2 | 1 |
| 15 | 24.14152 | 13 | 2 | 5    | 8    | 2 | 2 | 2 | 1 |
| 16 | 29.08163 | 1  | 2 | 7    | 8    | 2 | 1 | 2 | 1 |
| 17 | 32.46618 | 3  | 1 | 8    | 3    | 2 | 2 | 2 | 2 |
| 18 | 30.13148 | 10 | 2 | 11   | 18   | 2 | 1 | 2 | 2 |
| 19 | 34.24499 | 8  | 1 | 15   | 20   | 2 | 1 | 2 | 1 |
| 20 | 32.04995 | 3  | 2 | 6    | 8    | 2 | 2 | 2 | 1 |
| 21 | 27.88762 | 8  | 2 | 5    | 7    | 2 | 1 | 2 | 1 |
| 22 | 27.76621 | 8  | 1 | 14   | 17   | 2 | 2 | 1 | 1 |
| 23 | 22.22222 | 1  | 2 | 5    | 7.2  | 2 | 2 | 2 | 1 |
| 24 | 22.65625 | 3  | 2 | 8.1  | 11.3 | 2 | 2 | 2 | 1 |
| 25 | 27.88762 | 8  | 2 | 5    | 7    | 2 | 1 | 2 | 1 |
| 26 | 43.67106 | 13 | 1 | 7    | 9    | 2 | 2 | 2 | 1 |
| 27 | 30.29778 | 11 | 2 | 7    | 9    | 2 | 2 | 2 | 1 |
| 28 | 28.13366 | 8  | 2 | 5    | 10   | 2 | 2 | 2 | 2 |
| 29 | 24.14152 | 13 | 2 | 5    | 8    | 2 | 2 | 2 | 1 |
| 30 | 28.93519 | 20 | 1 | 6    | 13   | 2 | 2 | 2 | 1 |
| 31 | 29.4887  | 7  | 2 | 5    | 8    | 2 | 2 | 2 | 1 |
| 32 | 29.13632 | 25 | 1 | 9    | 12   | 2 | 2 | 2 | 1 |
| 33 | 23.8054  | 9  | 2 | 8    | 10   | 2 | 1 | 2 | 1 |
| 34 | 34.24499 | 8  | 1 | 15   | 20   | 2 | 1 | 2 | 1 |
| 35 | 30.08006 | 1  | 1 | 8    | 10   | 2 | 2 | 2 | 1 |
| 36 | 21.09619 | 2  | 2 | 6    | 8    | 2 | 2 | 2 | 1 |
| 37 | 23.8054  | 2  | 1 | 8    | 11   | 2 | 2 | 2 | 1 |
| 38 | 28.04038 | 30 | 1 | 11   | 20   | 2 | 2 | 1 | 1 |
| 39 | 25.22409 | 1  | 1 | 9    | 11   | 2 | 2 | 1 | 1 |
| 40 | 29.59184 | 10 | 1 | 8    | 10   | 2 | 1 | 2 | 1 |
| 41 | 26.03749 | 15 | 2 | 6    | 9    | 2 | 2 | 2 | 1 |
| 42 | 24.9135  | 22 | 1 | 14   | 15   | 2 | 2 | 2 | 1 |
| 43 | 26.12245 | 12 | 1 | 11   | 12   | 2 | 1 | 1 | 1 |
| 44 | 28.69898 | 8  | 2 | 6    | 8    | 1 | 2 | 1 | 1 |
| 45 | 22.03857 | 14 | 1 | 5    | 9    | 2 | 2 | 1 | 1 |
| 46 | 28.30385 | 7  | 2 | 6    | 7    | 2 | 2 | 1 | 1 |
| 47 | 24.60973 | 3  | 2 | 6    | 10   | 2 | 2 | 1 | 1 |
| 48 | 26.39798 | 1  | 2 | 4    | 8    | 1 | 2 | 2 | 1 |
| 49 | 24.9135  | 34 | 2 | 7    | 10   | 1 | 1 | 1 | 1 |
| 50 | 23.4375  | 21 | 1 | 9    | 13   | 2 | 2 | 2 | 1 |
| 51 | 22.26563 | 18 | 2 | 6    | 7    | 2 | 2 | 2 | 1 |

|    |          |    |   |     |      |   |   |   |   |
|----|----------|----|---|-----|------|---|---|---|---|
| 1  |          |    |   |     |      |   |   |   |   |
| 2  | 20.0796  | 10 | 1 | 6   | 8    | 2 | 2 | 2 | 1 |
| 3  | 24.34176 | 4  | 2 | 6.7 | 18   | 1 | 2 | 2 | 1 |
| 4  | 23.30668 | 3  | 1 | 6.1 | 4.7  | 2 | 1 | 2 | 1 |
| 5  | 27.23922 | 5  | 1 | 5.5 | 9.8  | 2 | 2 | 2 | 1 |
| 6  | 24.00549 | 1  | 2 | 5.7 | 7.3  | 2 | 2 | 2 | 1 |
| 7  | 22.51631 | 8  | 1 | 7.4 | 12.1 | 2 | 2 | 2 | 1 |
| 8  | 23.33768 | 4  | 2 | 6.1 | 4.7  | 1 | 2 | 1 | 1 |
| 9  | 27.91552 | 5  | 1 | 9.7 | 15.5 | 2 | 2 | 2 | 1 |
| 10 | 19.83471 | 8  | 2 | 6.7 | 4.7  | 2 | 2 | 1 | 1 |
| 11 | 27.25089 | 8  | 1 | 5.6 | 9    | 2 | 2 | 2 | 1 |
| 12 | 24.30462 | 3  | 1 | 8   | 6    | 2 | 2 | 2 | 1 |
| 13 | 26.31464 | 1  | 1 | 8   | 12.3 | 2 | 2 | 2 | 1 |
| 14 | 23.30905 | 12 | 2 | 8   | 14   | 2 | 2 | 2 | 1 |
| 15 | 27.30344 | 1  | 2 | 8.2 | 7    | 2 | 2 | 2 | 1 |
| 16 | 27.27633 | 4  | 2 | 4   | 7    | 2 | 2 | 2 | 1 |
| 17 | 27.05515 | 4  | 2 | 7   | 8    | 2 | 2 | 2 | 1 |
| 18 | 30.58802 | 1  | 2 | 12  | 10   | 2 | 2 | 2 | 1 |
| 19 | 23.8048  | 4  | 2 | 7   | 6    | 2 | 2 | 1 | 1 |
| 20 | 27.11111 | 3  | 2 | 7   | 9    | 2 | 2 | 2 | 1 |
| 21 | 24.23823 | 4  | 1 | 11  | 13   | 2 | 2 | 2 | 1 |
| 22 | 21.58003 | 4  | 2 | 8   | 11   | 2 | 2 | 2 | 1 |
| 23 | 31.86683 | 14 | 1 | 8   | 7    | 2 | 2 | 2 | 1 |
| 24 | 26.39798 | 22 | 2 | 6   | 11   | 2 | 2 | 2 | 1 |
| 25 | 26.40236 | 3  | 1 | 6   | 11.5 | 1 | 2 | 2 | 1 |
| 26 | 25.65437 | 15 | 1 | 11  | 7.3  | 2 | 2 | 2 | 1 |
| 27 | 21.21832 | 2  | 2 | 11  | 12   | 2 | 2 | 2 | 1 |
| 28 | 28.90625 | 19 | 2 | 5   | 8    | 2 | 2 | 2 | 1 |
| 29 | 33.59375 | 1  | 2 | 8   | 11.4 | 2 | 2 | 2 | 1 |
| 30 | 25.86451 | 15 | 2 | 8   | 12   | 2 | 2 | 1 | 1 |
| 31 | 25.78125 | 8  | 2 | 9   | 15   | 2 | 2 | 2 | 1 |
| 32 | 23.12467 | 8  | 2 | 5   | 18   | 2 | 2 | 1 | 1 |
| 33 | 22.21297 | 7  | 2 | 10  | 13   | 2 | 2 | 2 | 1 |
| 34 | 22.47659 | 13 | 2 | 5   | 7    | 2 | 1 | 2 | 1 |
| 35 | 25.71166 | 0  | 2 | 10  | 12   | 2 | 2 | 2 | 1 |
| 36 | 20.86112 | 20 | 1 | 7   | 18   | 1 | 2 | 2 | 1 |
| 37 | 22.83737 | 5  | 2 | 6   | 10   | 2 | 2 | 2 | 1 |
| 38 | 21.51386 | 6  | 2 | 7   | 10   | 2 | 2 | 2 | 1 |
| 39 | 25.63692 | 2  | 2 | 9   | 11   | 2 | 2 | 2 | 1 |
| 40 | 23.23346 | 3  | 1 | 5   | 9    | 2 | 2 | 2 | 1 |
| 41 | 23.73866 | 7  | 2 | 8   | 11   | 2 | 1 | 2 | 1 |
| 42 | 25.52965 | 12 | 2 | 7   | 12   | 1 | 2 | 2 | 1 |
| 43 | 30.42185 | 5  | 2 | 6   | 12   | 2 | 2 | 2 | 1 |
| 44 | 25       | 1  | 2 | 7   | 9    | 2 | 2 | 2 | 1 |
| 45 | 20.95717 | 11 | 1 | 12  | 11   | 1 | 2 | 2 | 1 |
| 46 | 27.6398  | 14 | 2 | 12  | 15   | 2 | 2 | 2 | 1 |
| 47 | 24.97399 | 13 | 2 | 9   | 20   | 2 | 2 | 2 | 1 |
| 48 | 29.40227 | 2  | 2 | 6   | 9    | 1 | 1 | 2 | 1 |
| 49 | 23.87512 | 11 | 1 | 6   | 9    | 2 | 2 | 2 | 1 |
| 50 | 20.79673 | 10 | 2 | 10  | 14   | 2 | 2 | 2 | 1 |
| 51 | 24.65483 | 5  | 1 | 9   | 10   | 2 | 2 | 2 | 1 |

|    |          |    |   |    |     |   |   |   |   |
|----|----------|----|---|----|-----|---|---|---|---|
| 1  |          |    |   |    |     |   |   |   |   |
| 2  | 24.44444 | 7  | 2 | 6  | 9   | 2 | 2 | 2 | 1 |
| 3  | 22.37034 | 4  | 2 | 6  | 7   | 2 | 1 | 2 | 1 |
| 4  | 22.0741  | 20 | 1 | 13 | 15  | 2 | 1 | 2 | 1 |
| 5  | 32       | 1  | 2 | 5  | 7   | 2 | 2 | 2 | 1 |
| 6  | 27.70526 | 2  | 2 | 5  | 9   | 2 | 1 | 2 | 1 |
| 7  | 25.07619 | 11 | 2 | 8  | 12  | 2 | 2 | 2 | 1 |
| 8  | 21.50447 | 2  | 1 | 5  | 7   | 2 | 1 | 2 | 1 |
| 9  | 23.45656 | 6  | 1 | 11 | 14  | 2 | 1 | 2 | 1 |
| 10 | 27.20961 | 11 | 2 | 7  | 9   | 2 | 2 | 2 | 1 |
| 11 | 29.51594 | 14 | 1 | 13 | 15  | 2 | 2 | 2 | 1 |
| 12 | 33.7477  | 3  | 1 | 13 | 14  | 2 | 2 | 2 | 1 |
| 13 | 32.7316  | 1  | 2 | 7  | 8   | 2 | 2 | 2 | 1 |
| 14 | 27.67874 | 9  | 1 | 7  | 8   | 2 | 2 | 2 | 1 |
| 15 | 23.06805 | 6  | 1 | 6  | 7   | 2 | 2 | 2 | 1 |
| 16 | 27.19179 | 10 | 1 | 12 | 11  | 2 | 1 | 2 | 1 |
| 17 | 26.77593 | 3  | 2 | 7  | 9   | 2 | 2 | 2 | 1 |
| 18 | 27.67874 | 3  | 2 | 11 | 12  | 2 | 2 | 2 | 1 |
| 19 | 20.8292  | 7  | 1 | 15 | 18  | 2 | 1 | 2 | 1 |
| 20 | 26.02264 | 9  | 1 | 8  | 11  | 2 | 1 | 2 | 1 |
| 21 | 27.11111 | 3  | 2 | 6  | 8   | 2 | 2 | 2 | 1 |
| 22 | 24.67105 | 6  | 2 | 9  | 11  | 2 | 2 | 2 | 1 |
| 23 | 24.19649 | 13 | 1 | 8  | 10  | 2 | 2 | 2 | 1 |
| 24 | 30.74787 | 3  | 2 | 9  | 11  | 2 | 2 | 2 | 1 |
| 25 | 30.63043 | 4  | 1 | 9  | 11  | 2 | 1 | 2 | 1 |
| 26 | 18.98659 | 10 | 1 | 12 | 16  | 2 | 1 | 2 | 1 |
| 27 | 24.14152 | 4  | 1 | 6  | 8   | 2 | 2 | 2 | 1 |
| 28 | 26.93572 | 15 | 1 | 18 | 20  | 2 | 2 | 2 | 1 |
| 29 | 33.22753 | 1  | 1 | 7  | 9   | 2 | 2 | 2 | 1 |
| 30 | 24.52682 | 9  | 1 | 8  | 14  | 2 | 2 | 2 | 1 |
| 31 | 45.88009 | 2  | 1 | 10 | 20  | 2 | 2 | 2 | 1 |
| 32 | 28.25097 | 12 | 1 | 5  | 8   | 2 | 2 | 2 | 1 |
| 33 | 33.69494 | 2  | 1 | 13 | 18  | 2 | 1 | 2 | 1 |
| 34 | 23.61275 | 6  | 1 | 6  | 12  | 2 | 2 | 2 | 1 |
| 35 | 17.25838 | 5  | 1 | 6  | 8   | 2 | 2 | 2 | 1 |
| 36 | 17.30104 | 1  | 2 | 11 | 18  | 2 | 2 | 2 | 1 |
| 37 | 32.83918 | 6  | 1 | 7  | 9   | 2 | 1 | 2 | 1 |
| 38 | 25.29938 | 9  | 1 | 8  | 14  | 2 | 2 | 2 | 1 |
| 39 | 32.31096 | 2  | 2 | 4  | 8   | 2 | 2 | 2 | 2 |
| 40 | 21.64127 | 2  | 2 | 7  | 9   | 2 | 2 | 2 | 1 |
| 41 | 21.58003 | 6  | 1 | 6  | 7   | 2 | 2 | 2 | 1 |
| 42 | 28.93519 | 4  | 1 | 7  | 8   | 2 | 2 | 2 | 1 |
| 43 | 27.27633 | 5  | 1 | 5  | 9   | 2 | 1 | 2 | 1 |
| 44 | 27.97068 | 5  | 1 | 7  | 9   | 2 | 1 | 2 | 1 |
| 45 | 26.91273 | 8  | 1 | 7  | 9   | 2 | 2 | 2 | 1 |
| 46 | 34.43526 | 2  | 1 | 7  | 9   | 2 | 2 | 2 | 1 |
| 47 | 28.13366 | 4  | 1 | 7  | 9   | 2 | 1 | 2 | 1 |
| 48 | 23.1911  | 1  | 1 | 7  | 8   | 2 | 2 | 2 | 1 |
| 49 | 26.27135 | 10 | 1 | 11 | 14  | 2 | 1 | 2 | 1 |
| 50 | 30.11028 | 14 | 2 | 7  | 6.5 | 2 | 2 | 2 | 1 |
| 51 | 29.26997 | 12 | 1 | 7  | 8   | 2 | 1 | 2 | 1 |



|    |          |    |   |      |      |   |   |   |   |
|----|----------|----|---|------|------|---|---|---|---|
| 1  |          |    |   |      |      |   |   |   |   |
| 2  | 32.45472 | 1  | 1 | 7    | 9    | 2 | 2 | 2 | 1 |
| 3  | 30.80125 | 9  | 2 | 8    | 11.1 | 2 | 1 | 2 | 1 |
| 4  | 27.55556 | 1  | 2 | 6.3  | 9.8  | 2 | 2 | 2 | 1 |
| 5  | 31.29737 | 16 | 1 | 11.8 | 13.1 | 2 | 1 | 2 | 1 |
| 6  | 25.45236 | 12 | 1 | 9.1  | 11.8 | 2 | 1 | 2 | 1 |
| 7  | 26.3779  | 4  | 2 | 5.2  | 8.1  | 2 | 1 | 2 | 1 |
| 8  | 35.7072  | 1  | 2 | 8.5  | 9    | 2 | 1 | 2 | 1 |
| 9  | 23.47303 | 5  | 1 | 9.2  | 10   | 2 | 2 | 2 | 1 |
| 10 | 30.73061 | 2  | 2 | 5.2  | 7.8  | 2 | 2 | 2 | 1 |
| 11 | 28.30385 | 1  | 1 | 6    | 7.2  | 2 | 2 | 2 | 1 |
| 12 | 26.22269 | 1  | 2 | 4.7  | 5.9  | 2 | 2 | 2 | 1 |
| 13 | 34.69686 | 1  | 2 | 4.7  | 6.8  | 2 | 1 | 2 | 1 |
| 14 | 29.03179 | 9  | 1 | 6.8  | 9.8  | 2 | 2 | 2 | 1 |
| 15 | 23.6304  | 8  | 2 | 6.5  | 12.1 | 2 | 2 | 2 | 1 |
| 16 | 29.43213 | 6  | 2 | 12.7 | 17.7 | 2 | 2 | 2 | 1 |
| 17 | 20.2395  | 1  | 1 | 6.4  | 11.4 | 2 | 2 | 2 | 1 |
| 18 | 23.49524 | 9  | 1 | 6.8  | 9.1  | 2 | 2 | 2 | 1 |
| 19 | 27.39226 | 1  | 2 | 3.1  | 8.8  | 2 | 2 | 2 | 1 |
| 20 | 27.76621 | 2  | 1 | 11.6 | 19   | 2 | 2 | 2 | 1 |
| 21 | 16.97601 | 1  | 2 | 4.2  | 6.3  | 2 | 2 | 2 | 1 |
| 22 | 24       | 5  | 2 | 6.8  | 9.3  | 2 | 2 | 2 | 1 |
| 23 | 22.89282 | 1  | 1 | 7.9  | 16.3 | 2 | 2 | 2 | 1 |
| 24 | 21.77778 | 10 | 1 | 15.2 | 22.4 | 2 | 2 | 2 | 2 |
| 25 | 22.0741  | 5  | 1 | 10.4 | 18.1 | 2 | 1 | 2 | 1 |
| 26 | 29.90303 | 5  | 2 | 6.1  | 7.9  | 2 | 1 | 2 | 1 |
| 27 | 26.75321 | 18 | 1 | 6.8  | 10.3 | 2 | 2 | 2 | 1 |
| 28 | 23.8048  | 2  | 1 | 6.8  | 7.9  | 2 | 2 | 2 | 1 |
| 29 | 28.53746 | 10 | 2 | 6.3  | 8.3  | 2 | 2 | 2 | 1 |
| 30 | 19.97622 | 6  | 2 | 12.2 | 14.2 | 2 | 1 | 2 | 1 |
| 31 | 33.70052 | 11 | 2 | 5.4  | 7    | 2 | 2 | 2 | 1 |
| 32 | 23.42237 | 13 | 2 | 6.4  | 7.7  | 2 | 2 | 2 | 1 |
| 33 | 25.65263 | 5  | 2 | 7.5  | 8.5  | 2 | 2 | 2 | 1 |
| 34 | 34.70776 | 1  | 2 | 10.8 | 16.1 | 2 | 2 | 2 | 1 |
| 35 | 23.2446  | 4  | 1 | 5    | 7.3  | 2 | 1 | 2 | 1 |
| 36 | 17.85714 | 6  | 1 | 16.6 | 18.2 | 2 | 2 | 2 | 1 |
| 37 | 27.58621 | 18 | 2 | 6    | 12.9 | 2 | 1 | 2 | 1 |
| 38 | 21.58003 | 3  | 1 | 6.2  | 16.2 | 2 | 2 | 2 | 2 |
| 39 | 27.11058 | 9  | 2 | 10.7 | 13.2 | 2 | 2 | 2 | 1 |
| 40 | 17.30104 | 11 | 1 | 6.7  | 9.3  | 2 | 1 | 2 | 1 |
| 41 | 27.47138 | 3  | 2 | 11   | 14   | 2 | 2 | 2 | 1 |
| 42 | 29.96878 | 4  | 1 | 7.2  | 11.2 | 2 | 2 | 2 | 2 |
| 43 | 26.84067 | 6  | 2 | 5    | 9.2  | 2 | 2 | 2 | 1 |
| 44 | 22.22222 | 5  | 2 | 6.4  | 9    | 2 | 2 | 2 | 1 |
| 45 | 27.05515 | 6  | 1 | 5.3  | 8    | 2 | 2 | 1 | 1 |
| 46 | 27.76621 | 1  | 1 | 5.7  | 8.9  | 2 | 2 | 1 | 1 |
| 47 | 21.70139 | 15 | 2 | 1.2  | 3.6  | 2 | 2 | 2 | 1 |
| 48 | 23.18339 | 6  | 2 | 9.5  | 11.3 | 2 | 2 | 2 | 2 |
| 49 | 26.67276 | 8  | 1 | 6    | 8.5  | 2 | 2 | 2 | 1 |
| 50 | 25.10957 | 5  | 1 | 9.8  | 12.1 | 2 | 2 | 2 | 1 |
| 51 | 22.49135 | 5  | 1 | 13.2 | 17.3 | 2 | 2 | 2 | 1 |

|    |          |     |   |       |      |   |   |   |   |
|----|----------|-----|---|-------|------|---|---|---|---|
| 1  |          |     |   |       |      |   |   |   |   |
| 2  | 24.12175 | 12  | 2 | 9.6   | 16.8 | 1 | 2 | 2 | 1 |
| 3  | 22.52151 | 1   | 2 | 5.6   | 8.5  | 2 | 2 | 1 | 1 |
| 4  | 31.99217 | 6   | 1 | 5     | 10   | 2 | 1 | 2 | 1 |
| 5  | 32.83918 | 3   | 2 | 4     | 8    | 2 | 2 | 2 | 1 |
| 6  | 22.82688 | 2   | 2 | 14    | 18   | 2 | 1 | 1 | 1 |
| 7  | 24.44444 | 6   | 2 | 6     | 8    | 2 | 2 | 1 | 2 |
| 8  | 23.45656 | 3   | 2 | 5     | 8    | 2 | 2 | 2 | 2 |
| 9  | 25.33333 | 3   | 2 | 10    | 22   | 2 | 1 | 2 | 1 |
| 10 | 24.44444 | 1   | 2 | 6.5   | 9    | 2 | 1 | 1 | 1 |
| 11 | 20.76125 | 10  | 1 | 11    | 13   | 1 | 1 | 1 | 1 |
| 12 | 23.14815 | 3   | 1 | 11    | 14   | 2 | 2 | 1 | 1 |
| 13 | 24.34176 | 2.5 | 2 | 6.6   | 7.4  | 2 | 2 | 2 | 1 |
| 14 | 22.22222 | 12  | 2 | 8.5   | 11.3 | 2 | 2 | 1 | 1 |
| 15 | 24.45107 | 10  | 2 | 7     | 10   | 2 | 1 | 1 | 1 |
| 16 | 22.82688 | 3   | 2 | 6     | 7    | 2 | 2 | 2 | 1 |
| 17 | 21.45727 | 5   | 1 | 6     | 5    | 2 | 2 | 2 | 1 |
| 18 | 26.89618 | 3   | 2 | 8     | 9    | 2 | 2 | 2 | 1 |
| 19 | 27.05515 | 10  | 2 | 4.5   | 8    | 2 | 2 | 2 | 1 |
| 20 | 23.49524 | 2   | 2 | 14    | 17   | 2 | 2 | 1 | 1 |
| 21 | 27.02581 | 4   | 2 | 8     | 14   | 2 | 2 | 2 | 1 |
| 22 | 25.5102  | 4   | 2 | 7     | 11   | 2 | 2 | 2 | 1 |
| 23 | 28.80441 | 3   | 1 | 10.11 | 18.1 | 2 | 2 | 2 | 1 |
| 24 | 31.95763 | 3   | 1 | 4     | 8    | 2 | 2 | 2 | 2 |
| 25 | 24.79667 | 6   | 2 | 8     | 12   | 2 | 2 | 1 | 1 |
| 26 | 20.81165 | 5   | 2 | 9     | 13   | 2 | 2 | 2 | 1 |
| 27 | 22.21368 | 5   | 2 | 4     | 6    | 2 | 2 | 2 | 1 |
| 28 | 19.29012 | 2   | 2 | 8     | 11   | 2 | 1 | 1 | 1 |
| 29 | 26.31464 | 2   | 1 | 12.6  | 15   | 2 | 2 | 2 | 2 |
| 30 | 18.76525 | 1   | 2 | 7.5   | 7.6  | 2 | 2 | 2 | 1 |
| 31 | 30.70041 | 6   | 2 | 5     | 10   | 2 | 2 | 1 | 1 |
| 32 | 25.33333 | 7   | 2 | 3.5   | 5.1  | 2 | 2 | 2 | 1 |
| 33 | 23.22543 | 8   | 1 | 4.8   | 16.8 | 2 | 2 | 2 | 1 |
| 34 | 22.22222 | 1   | 2 | 6.5   | 8.4  | 2 | 2 | 2 | 1 |
| 35 | 25.91068 | 3   | 2 | 5.4   | 8.9  | 2 | 2 | 2 | 1 |
| 36 | 24.80159 | 2   | 2 | 6     | 8.4  | 2 | 2 | 2 | 1 |
| 37 | 19.81768 | 2   | 2 | 8     | 13   | 2 | 2 | 2 | 1 |
| 38 | 19.39619 | 12  | 2 | 5.7   | 15   | 2 | 2 | 2 | 1 |
| 39 | 23.72529 | 4   | 2 | 5.1   | 7.4  | 2 | 2 | 2 | 1 |
| 40 | 25.39063 | 2   | 1 | 8     | 10   | 2 | 2 | 2 | 2 |
| 41 | 20.81165 | 3   | 1 | 9     | 11   | 2 | 1 | 2 | 1 |
| 42 | 18.64534 | 6   | 1 | 8     | 11   | 2 | 2 | 2 | 1 |
| 43 | 23.4375  | 2   | 2 | 6     | 8    | 2 | 2 | 2 | 1 |
| 44 | 25.88757 | 4   | 2 | 9     | 10   | 2 | 2 | 1 | 1 |
| 45 | 25.96953 | 5   | 1 | 10    | 13   | 2 | 2 | 2 | 1 |
| 46 | 21.22789 | 5   | 2 | 9     | 11   | 1 | 2 | 1 | 2 |
| 47 | 38.04994 | 4   | 2 | 11    | 14   | 2 | 2 | 2 | 2 |
| 48 | 27.68166 | 8   | 2 | 10    | 13   | 2 | 1 | 1 | 2 |
| 49 | 23.4375  | 1   | 2 | 8     | 11   | 2 | 2 | 1 | 1 |
| 50 | 28       | 8   | 2 | 5     | 8    | 2 | 2 | 2 | 1 |
| 51 | 19.05197 | 10  | 1 | 9     | 11   | 2 | 2 | 2 | 1 |

|    |          |    |   |       |       |   |   |   |   |
|----|----------|----|---|-------|-------|---|---|---|---|
| 1  |          |    |   |       |       |   |   |   |   |
| 2  | 27.34375 | 2  | 1 | 9     | 11    | 1 | 2 | 2 | 1 |
| 3  | 21.95248 | 5  | 1 | 6     | 11    | 2 | 2 | 2 | 1 |
| 4  | 20.81165 | 3  | 1 | 5     | 9     | 2 | 2 | 2 | 1 |
| 5  | 24.22145 | 1  | 2 | 6     | 8     | 2 | 2 | 2 | 1 |
| 6  |          |    |   |       |       |   |   |   |   |
| 7  | 19.53125 | 10 | 1 | 10    | 14    | 2 | 1 | 2 | 1 |
| 8  | 24.21875 | 3  | 2 | 10    | 14    | 2 | 2 | 2 | 1 |
| 9  | 22.89282 | 1  | 2 | 5     | 6     | 2 | 2 | 2 | 1 |
| 10 | 21.56455 | 8  | 2 | 8     | 12    | 2 | 2 | 2 | 1 |
| 11 | 35.20955 | 1  | 2 | 9     | 10    | 2 | 2 | 2 | 1 |
| 12 |          |    |   |       |       |   |   |   |   |
| 13 | 31.11111 | 12 | 2 | 12    | 16    | 2 | 2 | 2 | 1 |
| 14 | 22.86237 | 1  | 1 | 11    | 14    | 2 | 2 | 2 | 1 |
| 15 | 30.22222 | 6  | 2 | 4     | 7     | 2 | 2 | 2 | 1 |
| 16 | 31.21748 | 4  | 2 | 6     | 9     | 2 | 1 | 2 | 1 |
| 17 | 21.7502  | 8  | 2 | 10    | 13    | 2 | 2 | 2 | 1 |
| 18 |          |    |   |       |       |   |   |   |   |
| 19 | 22.86237 | 6  | 2 | 5     | 7     | 2 | 2 | 2 | 1 |
| 20 | 23.58833 | 10 | 2 | 12    | 14    | 2 | 1 | 2 | 1 |
| 21 | 32.79321 | 7  | 2 | 7     | 10    | 2 | 2 | 2 | 2 |
| 22 | 20       | 10 | 2 | 6.3   | 9     | 2 | 2 | 2 | 2 |
| 23 |          |    |   |       |       |   |   |   |   |
| 24 | 28.14787 | 4  | 2 | 11    | 15.8  | 2 | 2 | 2 | 2 |
| 25 | 31.11111 | 20 | 2 | 6     | 7     | 2 | 2 | 2 | 1 |
| 26 | 22.22222 | 7  | 2 | 10    | 9     | 2 | 2 | 2 | 1 |
| 27 | 31.46837 | 1  | 2 | 5     | 9     | 2 | 2 | 2 | 1 |
| 28 | 30.61225 | 14 | 2 | 8     | 10    | 2 | 2 | 1 | 1 |
| 29 | 25.56611 | 8  | 2 | 6     | 8     | 2 | 2 | 2 | 2 |
| 30 |          |    |   |       |       |   |   |   |   |
| 31 | 33.21799 | 8  | 1 | 18    | 21    | 2 | 2 | 2 | 2 |
| 32 | 24.12175 | 7  | 1 | 5     | 7     | 2 | 2 | 1 | 1 |
| 33 | 24.97704 | 5  | 1 | 25    | 27    | 2 | 2 | 1 | 1 |
| 34 | 28.88889 | 10 | 1 | 8     | 9     | 2 | 2 | 2 | 1 |
| 35 | 21.30395 | 8  | 2 | 7     | 9     | 2 | 2 | 1 | 1 |
| 36 |          |    |   |       |       |   |   |   |   |
| 37 | 21.22281 | 20 | 2 | 9     | 7     | 2 | 2 | 2 | 1 |
| 38 | 30.10212 | 16 | 1 | 7     | 12    | 2 | 2 | 2 | 1 |
| 39 | 29.29688 | 1  | 2 | 6     | 8     | 2 | 2 | 1 | 1 |
| 40 | 23.38869 | 3  | 2 | 10    | 13    | 2 | 2 | 2 | 1 |
| 41 |          |    |   |       |       |   |   |   |   |
| 42 | 29.26007 | 1  | 1 | 5     | 7     | 2 | 2 | 1 | 1 |
| 43 | 27.84585 | 20 | 2 | 9     | 11    | 2 | 2 | 1 | 1 |
| 44 | 25.10957 | 5  | 2 | 3     | 13    | 2 | 2 | 2 | 1 |
| 45 | 26.7094  | 10 | 1 | 6     | 9     | 2 | 2 | 2 | 1 |
| 46 | 23.18339 | 7  | 1 | 8     | 17    | 2 | 2 | 2 | 2 |
| 47 |          |    |   |       |       |   |   |   |   |
| 48 | 28.57796 | 2  | 1 | 13    | 16    | 2 | 2 | 1 | 1 |
| 49 | 27.11111 | 15 | 1 | 7     | 9     | 2 | 1 | 1 | 1 |
| 50 | 28.76397 | 8  | 2 | 6     | 9     | 2 | 2 | 2 | 1 |
| 51 | 27.26801 | 3  | 2 | 15.6  | 17.83 | 2 | 2 | 2 | 1 |
| 52 | 22.34778 | 8  | 1 | 15.1  | 17.66 | 2 | 1 | 2 | 1 |
| 53 |          |    |   |       |       |   |   |   |   |
| 54 | 31.16344 | 4  | 1 | 6.3   | 9.6   | 2 | 2 | 1 | 1 |
| 55 | 22.47659 | 3  | 1 | 11.9  | 13.4  | 1 | 2 | 2 | 1 |
| 56 | 18.66667 | 10 | 1 | 18.74 | 21.94 | 2 | 2 | 1 | 2 |
| 57 | 21.64127 | 1  | 1 | 6.9   | 9.3   | 2 | 1 | 2 | 1 |
| 58 | 21.33333 | 1  | 2 | 6     | 7.8   | 2 | 2 | 1 | 1 |
| 59 | 20.45184 | 1  | 1 | 5.05  | 9.55  | 2 | 2 | 1 | 2 |
| 60 | 24.88889 | 3  | 1 | 13.6  | 25.66 | 2 | 1 | 1 | 2 |

|    |          |    |   |      |       |   |   |   |   |
|----|----------|----|---|------|-------|---|---|---|---|
| 1  |          |    |   |      |       |   |   |   |   |
| 2  | 20.77562 | 3  | 1 | 6.3  | 7.6   | 1 | 1 | 2 | 1 |
| 3  | 19.47715 | 4  | 2 | 11.6 | 22.2  | 2 | 2 | 2 | 1 |
| 4  | 22.89282 | 1  | 2 | 8.22 | 15    | 2 | 2 | 1 | 1 |
| 5  | 22.26563 | 7  | 1 | 8.9  | 11.27 | 2 | 1 | 1 | 1 |
| 6  | 26.93572 | 5  | 1 | 8.9  | 10.1  | 2 | 2 | 2 | 1 |
| 7  | 20.19509 | 1  | 1 | 5.3  | 7     | 2 | 2 | 2 | 1 |
| 8  | 21.09619 | 9  | 1 | 11   | 19    | 2 | 2 | 2 | 1 |
| 9  | 20.50493 | 12 | 1 | 9    | 14    | 2 | 1 | 2 | 1 |
| 10 | 27.81588 | 2  | 1 | 6    | 17    | 2 | 2 | 2 | 1 |
| 11 | 19.90997 | 15 | 1 | 14   | 18    | 2 | 1 | 1 | 1 |
| 12 | 24.52682 | 5  | 1 | 6    | 9     | 2 | 2 | 2 | 1 |
| 13 | 24.38653 | 7  | 2 | 15   | 22    | 2 | 2 | 2 | 1 |
| 14 | 19.29012 | 7  | 2 | 8    | 16    | 2 | 2 | 2 | 1 |
| 15 | 22.22222 | 12 | 1 | 13   | 21    | 2 | 2 | 2 | 2 |
| 16 | 22.82996 | 3  | 2 | 11   | 17    | 2 | 1 | 2 | 1 |
| 17 | 23.55556 | 6  | 2 | 5    | 7     | 2 | 2 | 2 | 1 |
| 18 | 22.64087 | 10 | 2 | 6    | 9     | 2 | 1 | 2 | 1 |
| 19 | 22.58271 | 3  | 1 | 17   | 21    | 2 | 1 | 1 | 1 |
| 20 | 14.0625  | 20 | 1 | 9    | 14    | 2 | 2 | 2 | 1 |
| 21 | 18.5178  | 7  | 2 | 11   | 22    | 1 | 2 | 2 | 1 |
| 22 | 26.29172 | 3  | 1 | 6    | 10    | 2 | 2 | 2 | 1 |
| 23 | 21.30395 | 4  | 2 | 14   | 21    | 2 | 2 | 1 | 1 |
| 24 | 15.05514 | 12 | 2 | 6    | 8     | 2 | 2 | 1 | 1 |
| 25 | 21.77384 | 14 | 1 | 8    | 15    | 2 | 2 | 1 | 1 |
| 26 | 43.80165 | 8  | 1 | 7    | 9     | 1 | 2 | 1 | 1 |
| 27 | 25.5102  | 15 | 1 | 13   | 16    | 1 | 1 | 2 | 1 |
| 28 | 21.64127 | 10 | 1 | 9    | 14    | 1 | 2 | 2 | 1 |
| 29 | 17.00882 | 1  | 2 | 6    | 10    | 2 | 2 | 2 | 1 |
| 30 | 24.76757 | 2  | 2 | 8    | 9     | 1 | 1 | 2 | 1 |
| 31 | 22.86237 | 13 | 2 | 16   | 24    | 2 | 2 | 2 | 1 |
| 32 | 19.84127 | 1  | 1 | 8    | 13    | 2 | 2 | 2 | 1 |
| 33 | 19.22769 | 9  | 1 | 8    | 15    | 1 | 1 | 2 | 1 |
| 34 | 22.26563 | 2  | 1 | 6    | 7     | 2 | 1 | 2 | 1 |
| 35 | 20.50493 | 11 | 2 | 9    | 15    | 1 | 2 | 2 | 2 |
| 36 | 23.1911  | 3  | 1 | 6    | 7     | 1 | 1 | 2 | 1 |
| 37 | 23.4375  | 1  | 2 | 6    | 7     | 2 | 1 | 2 | 1 |
| 38 | 20.93664 | 2  | 2 | 6    | 8     | 2 | 2 | 2 | 1 |
| 39 | 16.44737 | 8  | 1 | 18   | 20    | 2 | 2 | 2 | 1 |
| 40 | 21.50189 | 1  | 1 | 19   | 28    | 2 | 2 | 1 | 1 |
| 41 | 20.0796  | 1  | 1 | 17   | 26    | 1 | 2 | 2 | 1 |
| 42 | 22.31328 | 5  | 2 | 6    | 8     | 2 | 2 | 1 | 1 |
| 43 | 20.28123 | 18 | 1 | 14   | 22    | 2 | 2 | 2 | 1 |
| 44 | 21.23057 | 19 | 1 | 6    | 13    | 2 | 2 | 1 | 1 |
| 45 | 20.95717 | 24 | 2 | 12   | 17    | 2 | 1 | 1 | 1 |
| 46 | 24.34176 | 15 | 1 | 5    | 8     | 2 | 2 | 1 | 1 |
| 47 | 21.33821 | 30 | 1 | 6    | 9     | 2 | 2 | 2 | 1 |
| 48 | 22.37568 | 3  | 2 | 9    | 14    | 2 | 2 | 2 | 1 |
| 49 | 22.18935 | 12 | 1 | 7    | 9     | 2 | 2 | 2 | 1 |
| 50 | 21.71925 | 18 | 1 | 6    | 10    | 2 | 2 | 1 | 2 |
| 51 | 20.54569 | 10 | 1 | 5    | 8     | 2 | 1 | 2 | 1 |

|    |          |    |   |     |      |   |   |   |   |
|----|----------|----|---|-----|------|---|---|---|---|
| 1  |          |    |   |     |      |   |   |   |   |
| 2  | 24.38653 | 16 | 1 | 9   | 13   | 2 | 1 | 2 | 1 |
| 3  | 29.06977 | 12 | 1 | 16  | 19   | 2 | 2 | 2 | 1 |
| 4  | 29.06977 | 12 | 1 | 16  | 19   | 2 | 2 | 2 | 1 |
| 5  | 21.875   | 8  | 2 | 12  | 20   | 2 | 2 | 2 | 2 |
| 6  |          |    |   |     |      |   |   |   |   |
| 7  | 30.86304 | 9  | 1 | 6   | 8    | 2 | 1 | 1 | 1 |
| 8  | 26.02758 | 2  | 2 | 5.4 | 8.1  | 2 | 1 | 2 | 1 |
| 9  | 21.22789 | 36 | 2 | 5.8 | 7.9  | 1 | 2 | 2 | 1 |
| 10 | 20.95717 | 24 | 2 | 12  | 17   | 2 | 1 | 1 | 1 |
| 11 | 21.00767 | 3  | 1 | 6.4 | 8    | 1 | 2 | 2 | 1 |
| 12 |          |    |   |     |      |   |   |   |   |
| 13 | 24.09297 | 5  | 2 | 7   | 22   | 1 | 1 | 1 | 1 |
| 14 | 27.47624 | 10 | 1 | 9   | 12   | 2 | 2 | 2 | 1 |
| 15 | 23.73866 | 8  | 1 | 7   | 10   | 1 | 2 | 1 | 2 |
| 16 | 28.959   | 4  | 1 | 7   | 13   | 2 | 2 | 2 | 1 |
| 17 | 25.96454 | 9  | 1 | 10  | 17   | 2 | 1 | 2 | 1 |
| 18 |          |    |   |     |      |   |   |   |   |
| 19 | 22.26563 | 2  | 2 | 6   | 7    | 1 | 1 | 1 | 1 |
| 20 | 24.30462 | 10 | 1 | 7.9 | 19   | 2 | 2 | 2 | 1 |
| 21 | 18.55956 | 12 | 1 | 7   | 10   | 2 | 2 | 2 | 1 |
| 22 | 24.67702 | 15 | 1 | 7   | 9    | 2 | 1 | 2 | 1 |
| 23 |          |    |   |     |      |   |   |   |   |
| 24 | 15.94388 | 12 | 1 | 9   | 22   | 2 | 1 | 2 | 1 |
| 25 | 22.83737 | 5  | 1 | 7   | 9    | 2 | 1 | 2 | 2 |
| 26 | 19.69267 | 12 | 1 | 9   | 14   | 2 | 2 | 2 | 2 |
| 27 | 23.33768 | 10 | 1 | 11  | 14   | 2 | 1 | 2 | 1 |
| 28 | 22.49135 | 10 | 2 | 8.4 | 9    | 2 | 1 | 2 | 1 |
| 29 | 19.53125 | 5  | 2 | 9   | 12   | 1 | 2 | 2 | 1 |
| 30 |          |    |   |     |      |   |   |   |   |
| 31 | 21.93635 | 12 | 1 | 11  | 12   | 2 | 2 | 2 | 1 |
| 32 | 18.30577 | 16 | 1 | 8   | 12   | 2 | 1 | 2 | 1 |
| 33 | 29.72108 | 15 | 1 | 8   | 10   | 2 | 1 | 1 | 1 |
| 34 | 25.34435 | 8  | 2 | 24  | 11   | 2 | 1 | 2 | 1 |
| 35 | 17.71542 | 1  | 1 | 7   | 28   | 2 | 1 | 2 | 2 |
| 36 |          |    |   |     |      |   |   |   |   |
| 37 | 21.19274 | 2  | 1 | 12  | 17   | 1 | 1 | 2 | 1 |
| 38 | 26.17188 | 2  | 2 | 8   | 9    | 2 | 1 | 2 | 1 |
| 39 | 20.54569 | 20 | 1 | 8   | 10   | 2 | 2 | 1 | 2 |
| 40 | 21.33333 | 7  | 1 | 15  | 24   | 2 | 1 | 2 | 1 |
| 41 |          |    |   |     |      |   |   |   |   |
| 42 | 23.45856 | 10 | 1 | 15  | 30   | 2 | 2 | 2 | 1 |
| 43 | 19.39619 | 9  | 1 | 24  | 28   | 2 | 1 | 2 | 2 |
| 44 | 17.1875  | 20 | 2 | 6   | 8    | 2 | 2 | 2 | 1 |
| 45 | 29.7442  | 1  | 2 | 7   | 8    | 2 | 1 | 2 | 1 |
| 46 | 21.67126 | 22 | 1 | 10  | 16   | 2 | 2 | 2 | 1 |
| 47 |          |    |   |     |      |   |   |   |   |
| 48 | 29.05475 | 15 | 2 | 13  | 21   | 2 | 1 | 2 | 1 |
| 49 | 21.38394 | 15 | 1 | 8   | 10   | 2 | 2 | 2 | 1 |
| 50 | 23.56663 | 3  | 1 | 10  | 14   | 2 | 2 | 2 | 1 |
| 51 | 22.60026 | 17 | 1 | 12  | 14   | 2 | 2 | 2 | 1 |
| 52 | 24.38272 | 10 | 1 | 6   | 13   | 2 | 1 | 2 | 2 |
| 53 |          |    |   |     |      |   |   |   |   |
| 54 | 25.07619 | 12 | 1 | 10  | 19   | 2 | 1 | 2 | 1 |
| 55 | 25.95156 | 3  | 1 | 7.3 | 8.14 | 2 | 2 | 2 | 2 |
| 56 | 26.23356 | 7  | 1 | 11  | 12   | 2 | 2 | 2 | 1 |
| 57 | 19.05197 | 6  | 2 | 7   | 9    | 2 | 1 | 2 | 1 |
| 58 | 22.47659 | 10 | 2 | 7   | 11   | 2 | 1 | 2 | 1 |
| 59 | 22.67995 | 3  | 1 | 8   | 9    | 2 | 2 | 2 | 1 |
| 60 | 22.86237 | 7  | 1 | 9   | 11   | 2 | 2 | 2 | 1 |

|    |          |    |   |      |      |   |   |   |   |
|----|----------|----|---|------|------|---|---|---|---|
| 1  |          |    |   |      |      |   |   |   |   |
| 2  | 20.77562 | 2  | 2 | 10   | 17   | 2 | 1 | 2 | 1 |
| 3  | 23.78121 | 4  | 2 | 6    | 8    | 2 | 2 | 1 | 2 |
| 4  | 22.5183  | 20 | 2 | 7    | 10   | 2 | 2 | 2 | 1 |
| 5  | 22.98401 | 3  | 1 | 6    | 8    | 2 | 2 | 2 | 1 |
| 6  | 18.59104 | 5  | 1 | 9    | 17   | 2 | 2 | 2 | 1 |
| 7  | 24.7768  | 10 | 2 | 6    | 24   | 2 | 1 | 2 | 1 |
| 8  | 26.47918 | 9  | 1 | 6.7  | 8.3  | 2 | 1 | 2 | 2 |
| 9  | 25.14861 | 6  | 2 | 7.9  | 10.8 | 2 | 2 | 1 | 2 |
| 10 | 25.96953 | 5  | 1 | 9.8  | 17   | 2 | 2 | 2 | 2 |
| 11 | 46.23725 | 12 | 1 | 9.7  | 11.5 | 2 | 2 | 2 | 1 |
| 12 | 27.40766 | 3  | 2 | 6    | 8.5  | 2 | 2 | 2 | 1 |
| 13 | 23.8054  | 4  | 1 | 8.9  | 14.9 | 2 | 2 | 2 | 1 |
| 14 | 18.08021 | 7  | 1 | 6.4  | 7.5  | 2 | 2 | 2 | 1 |
| 15 | 32.14286 | 2  | 1 | 11.6 | 14.6 | 2 | 1 | 2 | 1 |
| 16 | 23.33768 | 6  | 2 | 13.7 | 14.4 | 2 | 2 | 2 | 1 |
| 17 | 24.21875 | 3  | 2 | 6.6  | 24   | 2 | 2 | 2 | 1 |
| 18 | 26.14269 | 14 | 2 | 9.3  | 12.6 | 2 | 1 | 2 | 1 |
| 19 | 33.77045 | 1  | 2 | 13.7 | 24   | 2 | 1 | 2 | 1 |
| 20 | 25.78125 | 15 | 1 | 14.8 | 17.9 | 2 | 2 | 2 | 1 |
| 21 | 21.70139 | 1  | 1 | 3.6  | 8.8  | 2 | 2 | 2 | 2 |
| 22 | 26.67276 | 8  | 2 | 10.6 | 12.6 | 2 | 2 | 2 | 1 |
| 23 | 27.67874 | 1  | 2 | 5.2  | 9.2  | 2 | 2 | 2 | 1 |
| 24 | 18.51081 | 1  | 1 | 9.1  | 20.4 | 2 | 2 | 2 | 1 |
| 25 | 21.35992 | 12 | 2 | 5    | 7.1  | 2 | 1 | 2 | 1 |
| 26 | 25.23634 | 1  | 2 | 10.6 | 13.6 | 2 | 2 | 2 | 1 |
| 27 | 24.52435 | 1  | 1 | 5.4  | 6.4  | 2 | 1 | 2 | 1 |
| 28 | 18.85882 | 2  | 1 | 19   | 23   | 2 | 1 | 1 | 1 |
| 29 | 29.51594 | 1  | 2 | 6.4  | 7.8  | 2 | 2 | 2 | 1 |
| 30 | 26.75321 | 8  | 2 | 6.8  | 7.5  | 2 | 2 | 2 | 1 |
| 31 | 24.32323 | 1  | 2 | 8.3  | 12.4 | 2 | 1 | 1 | 2 |
| 32 | 21.00073 | 7  | 1 | 8.3  | 10.4 | 2 | 1 | 2 | 1 |
| 33 | 24.03461 | 5  | 2 | 5.8  | 8.7  | 2 | 1 | 2 | 1 |
| 34 | 21.04805 | 8  | 2 | 5.4  | 6    | 2 | 1 | 2 | 1 |
| 35 | 18.66667 | 16 | 1 | 5.7  | 12.2 | 2 | 1 | 1 | 1 |
| 36 | 23.11111 | 5  | 2 | 9.5  | 11.5 | 2 | 1 | 2 | 1 |
| 37 | 24.24392 | 3  | 2 | 4.8  | 6.9  | 2 | 1 | 2 | 1 |
| 38 | 23.37258 | 5  | 2 | 8.5  | 10.4 | 2 | 1 | 2 | 1 |
| 39 | 22.93975 | 4  | 1 | 6.7  | 8.8  | 2 | 2 | 2 | 1 |
| 40 | 23.45656 | 4  | 2 | 5.8  | 15.8 | 2 | 2 | 2 | 1 |
| 41 | 28.76397 | 1  | 2 | 6.1  | 8.2  | 2 | 2 | 2 | 1 |
| 42 | 22.82688 | 13 | 1 | 5.4  | 7.4  | 2 | 1 | 2 | 1 |
| 43 | 21.50189 | 4  | 2 | 7.9  | 9.9  | 2 | 1 | 2 | 1 |
| 44 | 23.96205 | 4  | 1 | 9.8  | 11.3 | 2 | 2 | 2 | 1 |
| 45 | 20.50493 | 8  | 1 | 11.2 | 13.2 | 2 | 2 | 2 | 1 |
| 46 | 24.34176 | 2  | 2 | 6.4  | 9.4  | 2 | 1 | 2 | 1 |
| 47 | 25       | 6  | 2 | 9.8  | 12.8 | 2 | 1 | 2 | 1 |
| 48 | 20.3428  | 1  | 2 | 6.1  | 7.4  | 2 | 2 | 2 | 1 |
| 49 | 18.369   | 4  | 2 | 7.9  | 17.2 | 2 | 2 | 2 | 1 |
| 50 | 21.875   | 2  | 1 | 9.8  | 16.8 | 2 | 2 | 2 | 1 |
| 51 | 22.83288 | 1  | 2 | 6.9  | 10   | 2 | 1 | 2 | 2 |

|    |          |    |   |      |      |   |   |   |   |
|----|----------|----|---|------|------|---|---|---|---|
| 1  |          |    |   |      |      |   |   |   |   |
| 2  | 18.32562 | 5  | 2 | 5.9  | 6    | 2 | 1 | 2 | 1 |
| 3  | 24.34961 | 15 | 1 | 9.8  | 14.5 | 2 | 1 | 2 | 1 |
| 4  | 25.15315 | 13 | 2 | 6.9  | 8.4  | 2 | 2 | 2 | 2 |
| 5  | 18.42025 | 2  | 1 | 8.7  | 12   | 2 | 2 | 2 | 1 |
| 6  | 22.4323  | 18 | 1 | 10   | 14.2 | 2 | 2 | 1 | 1 |
| 7  | 25.96953 | 4  | 2 | 10   | 12   | 2 | 1 | 2 | 1 |
| 8  | 15.78878 | 2  | 1 | 10.8 | 13.7 | 2 | 2 | 2 | 1 |
| 9  | 24.19649 | 15 | 2 | 7.2  | 9.7  | 2 | 2 | 1 | 2 |
| 10 | 23.04688 | 8  | 1 | 16.6 | 20   | 2 | 2 | 1 | 1 |
| 11 | 24.12175 | 5  | 2 | 6.9  | 8.7  | 2 | 2 | 2 | 1 |
| 12 | 17.85714 | 10 | 2 | 10.1 | 17.8 | 2 | 1 | 2 | 1 |
| 13 | 31.95763 | 3  | 2 | 8.8  | 10.5 | 2 | 2 | 2 | 1 |
| 14 | 26.66667 | 3  | 2 | 6.7  | 8.1  | 2 | 1 | 1 | 1 |
| 15 | 20.54419 | 8  | 1 | 10.6 | 11.1 | 2 | 2 | 2 | 1 |
| 16 | 24.65303 | 12 | 1 | 7.3  | 10.2 | 2 | 2 | 2 | 2 |
| 17 | 24.14152 | 2  | 1 | 8.7  | 10.1 | 2 | 2 | 2 | 1 |
| 18 | 21.73801 | 2  | 2 | 6.9  | 9.9  | 2 | 1 | 1 | 1 |
| 19 | 21.32513 | 4  | 2 | 6.3  | 7.3  | 2 | 1 | 1 | 1 |
| 20 | 22.82688 | 11 | 1 | 6.6  | 19.5 | 2 | 1 | 1 | 1 |
| 21 | 24.24392 | 14 | 1 | 9.1  | 13.3 | 2 | 2 | 2 | 1 |
| 22 | 24.34961 | 1  | 2 | 6.9  | 9.7  | 2 | 1 | 2 | 1 |
| 23 | 21.33333 | 8  | 2 | 6.7  | 9.8  | 2 | 1 | 2 | 1 |
| 24 | 19.22338 | 30 | 2 | 5.8  | 10.6 | 2 | 2 | 2 | 1 |
| 25 | 21.90758 | 8  | 1 | 7.2  | 15.2 | 2 | 1 | 1 | 1 |
| 26 | 23.49524 | 6  | 2 | 13   | 18   | 2 | 1 | 2 | 1 |
| 27 | 24.53897 | 3  | 2 | 6.9  | 8.9  | 2 | 1 | 2 | 1 |
| 28 | 25.06575 | 21 | 1 | 5    | 10.3 | 2 | 2 | 2 | 1 |
| 29 | 22.86237 | 5  | 1 | 8.4  | 10.7 | 2 | 2 | 1 | 1 |
| 30 | 20.57613 | 15 | 1 | 9.8  | 12.6 | 2 | 1 | 2 | 2 |
| 31 | 22.22222 | 3  | 2 | 9.6  | 15.1 | 2 | 2 | 2 | 2 |
| 32 | 26.83865 | 1  | 2 | 6.9  | 7.8  | 2 | 2 | 2 | 1 |
| 33 | 23.37258 | 6  | 2 | 9.6  | 15   | 2 | 2 | 1 | 1 |
| 34 | 24.34961 | 20 | 2 | 10.6 | 16.9 | 2 | 1 | 2 | 1 |
| 35 | 37.16563 | 6  | 2 | 5    | 6.9  | 2 | 1 | 2 | 2 |
| 36 | 31.11111 | 4  | 2 | 9.6  | 11.5 | 2 | 2 | 2 | 1 |
| 37 | 25.47666 | 1  | 1 | 6.7  | 9    | 2 | 1 | 2 | 2 |
| 38 | 28.617   | 4  | 1 | 8    | 10   | 2 | 1 | 2 | 1 |
| 39 | 17.60477 | 1  | 1 | 6    | 8.9  | 2 | 2 | 1 | 1 |
| 40 | 20.2395  | 4  | 2 | 9    | 10   | 2 | 2 | 2 | 1 |
| 41 | 23.37258 | 4  | 2 | 5.2  | 6    | 2 | 1 | 1 | 1 |
| 42 | 28.125   | 1  | 2 | 6.9  | 11.6 | 2 | 1 | 2 | 1 |
| 43 | 28.44444 | 12 | 2 | 5.2  | 6.4  | 2 | 2 | 2 | 1 |
| 44 | 23.82813 | 6  | 1 | 8.2  | 11.5 | 2 | 1 | 2 | 2 |
| 45 | 26.83865 | 2  | 2 | 6.7  | 9.8  | 1 | 1 | 2 | 1 |
| 46 | 21.45727 | 4  | 2 | 6.3  | 9.3  | 2 | 1 | 2 | 1 |
| 47 | 28.19692 | 2  | 2 | 5.3  | 11.6 | 2 | 1 | 2 | 1 |
| 48 | 22.31328 | 2  | 1 | 11.5 | 13.5 | 2 | 1 | 2 | 1 |
| 49 | 17.62538 | 2  | 1 | 18.4 | 28.6 | 2 | 2 | 2 | 1 |
| 50 | 18.25632 | 5  | 2 | 9.5  | 10.9 | 1 | 1 | 1 | 2 |
| 51 | 20.2848  | 4  | 2 | 6.5  | 9.5  | 2 | 2 | 2 | 1 |

|    |          |    |   |      |      |   |   |   |   |
|----|----------|----|---|------|------|---|---|---|---|
| 1  |          |    |   |      |      |   |   |   |   |
| 2  | 20.57613 | 5  | 2 | 6.7  | 9.8  | 2 | 1 | 2 | 1 |
| 3  | 26.47918 | 5  | 2 | 9.8  | 12.3 | 2 | 1 | 2 | 1 |
| 4  | 32.45568 | 3  | 2 | 8.7  | 10.3 | 2 | 2 | 2 | 1 |
| 5  | 33.62209 | 22 | 1 | 7.8  | 11.9 | 2 | 1 | 2 | 2 |
| 6  | 23.66864 | 3  | 1 | 6.5  | 9.8  | 2 | 2 | 2 | 1 |
| 7  | 21.33333 | 18 | 1 | 5.5  | 9.8  | 1 | 1 | 2 | 1 |
| 8  | 26.89232 | 5  | 2 | 6.8  | 12.2 | 2 | 2 | 2 | 2 |
| 9  | 22.50693 | 2  | 2 | 8.3  | 10.3 | 2 | 2 | 2 | 1 |
| 10 | 27.14158 | 1  | 2 | 7.6  | 8.7  | 2 | 1 | 1 | 1 |
| 11 | 24.14152 | 7  | 1 | 16.9 | 19.3 | 2 | 1 | 2 | 1 |
| 12 | 27.11111 | 1  | 2 | 4.9  | 9.8  | 2 | 1 | 2 | 1 |
| 13 | 22.23099 | 5  | 2 | 5.8  | 8    | 2 | 1 | 1 | 1 |
| 14 | 23.14815 | 20 | 2 | 6.8  | 9.7  | 2 | 2 | 1 | 2 |
| 15 | 33.12131 | 1  | 2 | 8.7  | 10.6 | 2 | 2 | 1 | 1 |
| 16 | 26.67276 | 1  | 2 | 7.1  | 8.3  | 2 | 1 | 2 | 1 |
| 17 | 24.76757 | 1  | 2 | 5.2  | 6.3  | 2 | 2 | 1 | 1 |
| 18 | 26.67276 | 3  | 2 | 5.8  | 6.8  | 1 | 2 | 1 | 1 |
| 19 | 20.28123 | 1  | 2 | 6.3  | 8.6  | 2 | 2 | 1 | 1 |
| 20 | 20.77562 | 1  | 2 | 10.5 | 21.6 | 1 | 1 | 1 | 1 |
| 21 | 21.09619 | 4  | 2 | 6.2  | 8.5  | 2 | 2 | 1 | 1 |
| 22 | 19.05197 | 2  | 2 | 11.5 | 15   | 2 | 1 | 1 | 1 |
| 23 | 29.33333 | 12 | 2 | 5.6  | 7.9  | 2 | 1 | 2 | 1 |
| 24 | 21.09619 | 5  | 1 | 12.2 | 27.3 | 1 | 1 | 2 | 1 |
| 25 | 28.40816 | 15 | 2 | 8.8  | 14.1 | 2 | 2 | 1 | 1 |
| 26 | 33.28402 | 5  | 2 | 10.6 | 16   | 2 | 2 | 2 | 1 |
| 27 | 26.02618 | 1  | 2 | 6.9  | 9    | 2 | 1 | 2 | 2 |
| 28 | 25.34435 | 2  | 2 | 5.2  | 8.6  | 2 | 2 | 2 | 2 |
| 29 | 26.89767 | 10 | 2 | 6.2  | 9.4  | 2 | 2 | 2 | 1 |
| 30 | 21.21914 | 5  | 2 | 6.9  | 8.3  | 2 | 1 | 1 | 1 |
| 31 | 24       | 5  | 2 | 8.8  | 12.6 | 2 | 2 | 2 | 2 |
| 32 | 30.25193 | 4  | 2 | 6.3  | 9.2  | 2 | 1 | 2 | 1 |
| 33 | 23.82813 | 1  | 2 | 6.6  | 9.7  | 2 | 1 | 2 | 1 |
| 34 | 24.88889 | 1  | 2 | 8.4  | 11.6 | 2 | 2 | 2 | 2 |
| 35 | 29.6875  | 3  | 2 | 5.8  | 7.4  | 2 | 1 | 2 | 1 |
| 36 | 31.20256 | 2  | 2 | 6.1  | 7.3  | 2 | 1 | 1 | 1 |
| 37 | 24.88889 | 2  | 1 | 8.5  | 10.5 | 2 | 1 | 2 | 2 |
| 38 | 20.40816 | 2  | 2 | 6.8  | 10   | 2 | 2 | 2 | 1 |
| 39 | 26.52392 | 3  | 2 | 5.8  | 7    | 2 | 2 | 1 | 1 |
| 40 | 23.8054  | 1  | 2 | 7.1  | 9.8  | 2 | 1 | 1 | 1 |
| 41 | 18.90204 | 17 | 1 | 14.8 | 24.8 | 2 | 2 | 2 | 1 |
| 42 | 17.77778 | 7  | 2 | 10.2 | 14.8 | 2 | 1 | 2 | 1 |
| 43 | 21.82107 | 1  | 2 | 12.6 | 18.6 | 2 | 2 | 2 | 1 |
| 44 | 22.22222 | 2  | 2 | 6.9  | 9.3  | 2 | 1 | 1 | 1 |
| 45 | 21.64127 | 10 | 2 | 6.9  | 9.8  | 2 | 1 | 2 | 1 |
| 46 | 23.30905 | 12 | 1 | 8.8  | 11.6 | 2 | 1 | 2 | 1 |
| 47 | 20.26936 | 6  | 2 | 8.3  | 10.8 | 2 | 2 | 1 | 1 |
| 48 | 26.03749 | 3  | 2 | 8.9  | 11.9 | 2 | 1 | 2 | 1 |
| 49 | 16.87886 | 2  | 1 | 9.8  | 15.5 | 2 | 1 | 2 | 1 |
| 50 | 29.27796 | 1  | 2 | 6.2  | 10.2 | 2 | 2 | 2 | 1 |
| 51 | 23.4375  | 2  | 2 | 14   | 16   | 2 | 2 | 1 | 1 |



|    |          |    |   |      |      |   |   |   |   |
|----|----------|----|---|------|------|---|---|---|---|
| 1  |          |    |   |      |      |   |   |   |   |
| 2  | 23.14815 | 1  | 2 | 9    | 16   | 2 | 2 | 1 | 1 |
| 3  | 25.96953 | 2  | 2 | 5.2  | 7.8  | 2 | 1 | 2 | 1 |
| 4  | 19.39619 | 15 | 2 | 5.4  | 8.4  | 2 | 1 | 2 | 2 |
| 5  | 27.70083 | 1  | 2 | 5.2  | 7.8  | 2 | 1 | 2 | 1 |
| 6  |          |    |   |      |      |   |   |   |   |
| 7  | 24.23823 | 1  | 1 | 5.8  | 9.2  | 2 | 2 | 2 | 1 |
| 8  | 24.88889 | 1  | 2 | 6.7  | 16.2 | 2 | 2 | 2 | 2 |
| 9  | 24       | 3  | 2 | 8.7  | 8.2  | 2 | 1 | 2 | 1 |
| 10 | 28.56648 | 2  | 2 | 9.1  | 8.4  | 2 | 1 | 2 | 2 |
| 11 | 35.69304 | 4  | 1 | 7.8  | 16.1 | 2 | 2 | 2 | 1 |
| 12 |          |    |   |      |      |   |   |   |   |
| 13 | 25.31545 | 1  | 2 | 9.2  | 15.6 | 2 | 1 | 2 | 1 |
| 14 | 29.37758 | 5  | 2 | 6.5  | 9.4  | 2 | 1 | 1 | 1 |
| 15 | 23.1911  | 4  | 2 | 6.4  | 12.3 | 2 | 2 | 1 | 1 |
| 16 | 25.77778 | 1  | 2 | 5.6  | 7.3  | 2 | 2 | 2 | 1 |
| 17 | 22.22222 | 1  | 1 | 4.6  | 7.2  | 2 | 2 | 2 | 1 |
| 18 |          |    |   |      |      |   |   |   |   |
| 19 | 17.48179 | 20 | 2 | 5.8  | 7.9  | 2 | 2 | 2 | 1 |
| 20 | 25.43748 | 2  | 2 | 6.4  | 12.3 | 2 | 1 | 2 | 1 |
| 21 | 22.34778 | 3  | 2 | 5.8  | 9.4  | 2 | 2 | 2 | 2 |
| 22 | 24.86395 | 1  | 2 | 15.2 | 21.1 | 2 | 2 | 1 | 1 |
| 23 |          |    |   |      |      |   |   |   |   |
| 24 | 28.72008 | 18 | 2 | 6.8  | 10.3 | 2 | 1 | 2 | 1 |
| 25 | 23.83301 | 3  | 2 | 5.8  | 9.7  | 2 | 2 | 1 | 1 |
| 26 | 25.77778 | 10 | 2 | 5.3  | 5.5  | 2 | 1 | 2 | 1 |
| 27 | 25.5367  | 2  | 2 | 9.8  | 10.2 | 2 | 2 | 2 | 1 |
| 28 | 22.07108 | 2  | 2 | 7    | 9    | 2 | 2 | 2 | 2 |
| 29 | 22.22222 | 30 | 2 | 10   | 20.6 | 2 | 2 | 1 | 2 |
| 30 |          |    |   |      |      |   |   |   |   |
| 31 | 24.55775 | 12 | 2 | 6.9  | 15.6 | 2 | 2 | 1 | 1 |
| 32 | 12.98477 | 4  | 2 | 5.5  | 9.9  | 2 | 2 | 2 | 2 |
| 33 | 22.81293 | 2  | 2 | 5.5  | 10.4 | 2 | 2 | 2 | 2 |
| 34 | 24.83576 | 12 | 1 | 5.5  | 9.9  | 2 | 2 | 1 | 1 |
| 35 | 20.54569 | 10 | 2 | 2.6  | 4.5  | 2 | 2 | 2 | 1 |
| 36 |          |    |   |      |      |   |   |   |   |
| 37 | 27.09925 | 1  | 2 | 5.9  | 10.5 | 2 | 1 | 2 | 1 |
| 38 | 24.83576 | 2  | 2 | 5.5  | 9.9  | 2 | 2 | 2 | 1 |
| 39 | 29.77778 | 1  | 2 | 2.6  | 4.5  | 2 | 2 | 2 | 1 |
| 40 | 25.06575 | 3  | 2 | 5.9  | 4.3  | 2 | 2 | 2 | 1 |
| 41 |          |    |   |      |      |   |   |   |   |
| 42 | 19.90997 | 10 | 2 | 5.5  | 4.2  | 2 | 1 | 2 | 1 |
| 43 | 22.18935 | 17 | 2 | 2.6  | 18.1 | 2 | 2 | 2 | 1 |
| 44 | 23.45656 | 3  | 2 | 5.9  | 6.1  | 2 | 1 | 2 | 1 |
| 45 | 26.74048 | 5  | 2 | 6.6  | 8.7  | 2 | 1 | 2 | 1 |
| 46 | 24.52682 | 18 | 2 | 6.8  | 12.3 | 2 | 1 | 2 | 1 |
| 47 |          |    |   |      |      |   |   |   |   |
| 48 | 24       | 2  | 2 | 6.2  | 8    | 2 | 1 | 2 | 2 |
| 49 | 20.88889 | 1  | 2 | 6.2  | 9.9  | 2 | 2 | 1 | 1 |
| 50 | 27.55556 | 3  | 2 | 15   | 20   | 2 | 1 | 2 | 1 |
| 51 | 15.55556 | 4  | 1 | 5.8  | 9.2  | 2 | 1 | 2 | 1 |
| 52 | 26.66667 | 20 | 2 | 6.2  | 9.4  | 2 | 1 | 2 | 1 |
| 53 |          |    |   |      |      |   |   |   |   |
| 54 | 18.73049 | 1  | 1 | 6.2  | 9.6  | 2 | 2 | 1 | 1 |
| 55 | 19.47715 | 16 | 1 | 16.2 | 21.6 | 2 | 2 | 2 | 1 |
| 56 | 25.63692 | 2  | 2 | 5.8  | 7.2  | 2 | 2 | 2 | 1 |
| 57 | 26.56435 | 1  | 2 | 6.2  | 8.5  | 2 | 1 | 2 | 2 |
| 58 | 22.22222 | 6  | 2 | 7    | 11   | 2 | 2 | 2 | 2 |
| 59 | 25.06575 | 21 | 2 | 7    | 10   | 2 | 2 | 2 | 1 |
| 60 | 22.18364 | 1  | 2 | 6    | 7    | 2 | 2 | 2 | 1 |

|    |          |    |   |      |      |   |   |   |   |
|----|----------|----|---|------|------|---|---|---|---|
| 1  |          |    |   |      |      |   |   |   |   |
| 2  | 20.25463 | 1  | 2 | 6    | 15   | 2 | 2 | 2 | 1 |
| 3  | 24.65303 | 6  | 2 | 6    | 9    | 2 | 2 | 2 | 1 |
| 4  | 21.45727 | 1  | 2 | 6    | 8    | 2 | 2 | 2 | 1 |
| 5  | 22.04917 | 1  | 2 | 9    | 15   | 2 | 2 | 2 | 1 |
| 6  | 27.00617 | 3  | 1 | 6    | 18   | 2 | 2 | 2 | 1 |
| 7  | 19.29012 | 1  | 2 | 12   | 19   | 2 | 2 | 1 | 1 |
| 8  | 31.63265 | 3  | 2 | 7    | 12   | 2 | 2 | 1 | 2 |
| 9  | 25.10388 | 10 | 1 | 7    | 4    | 2 | 2 | 2 | 1 |
| 10 | 18.73049 | 2  | 2 | 6    | 7    | 2 | 1 | 2 | 1 |
| 11 | 27.30519 | 1  | 2 | 9    | 11   | 2 | 2 | 2 | 1 |
| 12 | 22.95918 | 4  | 2 | 6    | 5    | 2 | 2 | 2 | 1 |
| 13 | 24.59491 | 6  | 1 | 5.7  | 13   | 2 | 2 | 2 | 1 |
| 14 | 22.98743 | 13 | 2 | 11.1 | 21   | 2 | 2 | 2 | 1 |
| 15 | 22.07108 | 16 | 2 | 8.5  | 12   | 2 | 2 | 2 | 2 |
| 16 | 21.91381 | 8  | 2 | 8    | 13   | 2 | 2 | 2 | 1 |
| 17 | 37.06136 | 2  | 2 | 7    | 10   | 2 | 2 | 2 | 2 |
| 18 | 26.52392 | 5  | 2 | 6    | 7    | 2 | 2 | 2 | 1 |
| 19 | 36.88889 | 1  | 2 | 6    | 10   | 2 | 2 | 2 | 2 |
| 20 | 29.51594 | 1  | 2 | 5    | 7    | 2 | 2 | 2 | 1 |
| 21 | 24.4646  | 8  | 1 | 9    | 11   | 2 | 2 | 2 | 1 |
| 22 | 20.95717 | 8  | 1 | 3    | 6    | 2 | 2 | 2 | 1 |
| 23 | 21.20845 | 15 | 1 | 10   | 13   | 2 | 1 | 2 | 1 |
| 24 | 22.27531 | 24 | 1 | 7    | 12   | 2 | 2 | 2 | 1 |
| 25 | 16.86625 | 3  | 2 | 15   | 19   | 1 | 2 | 2 | 2 |
| 26 | 21.40309 | 2  | 2 | 6    | 21   | 2 | 2 | 2 | 2 |
| 27 | 33.76039 | 4  | 2 | 7    | 13   | 2 | 2 | 1 | 1 |
| 28 | 29.24211 | 8  | 1 | 7    | 15   | 1 | 2 | 2 | 1 |
| 29 | 24.38653 | 10 | 2 | 9    | 12   | 2 | 2 | 2 | 2 |
| 30 | 22.50693 | 1  | 2 | 12   | 15   | 2 | 2 | 2 | 1 |
| 31 | 20.95717 | 3  | 1 | 7    | 9    | 2 | 2 | 2 | 1 |
| 32 | 24.60938 | 14 | 1 | 7    | 17   | 2 | 2 | 2 | 2 |
| 33 | 23.55556 | 4  | 2 | 10   | 13   | 2 | 2 | 2 | 2 |
| 34 | 22.34778 | 9  | 2 | 4.5  | 6    | 2 | 2 | 2 | 2 |
| 35 | 20.79673 | 5  | 2 | 12   | 15   | 1 | 1 | 2 | 1 |
| 36 | 38.77551 | 2  | 2 | 8    | 10   | 2 | 2 | 2 | 2 |
| 37 | 27.02581 | 5  | 1 | 8.8  | 9    | 2 | 2 | 2 | 1 |
| 38 | 21.91381 | 5  | 1 | 7    | 23   | 2 | 2 | 2 | 1 |
| 39 | 25.55941 | 5  | 2 | 5.8  | 7.2  | 2 | 2 | 2 | 1 |
| 40 | 24.11265 | 1  | 2 | 5.5  | 8    | 2 | 2 | 2 | 2 |
| 41 | 27.39226 | 2  | 2 | 5.4  | 8    | 2 | 1 | 2 | 1 |
| 42 | 30.38194 | 1  | 2 | 5    | 9    | 2 | 2 | 2 | 1 |
| 43 | 26.66667 | 1  | 2 | 6    | 8    | 2 | 1 | 2 | 1 |
| 44 | 20.17264 | 7  | 2 | 11   | 16   | 2 | 2 | 2 | 2 |
| 45 | 23.78121 | 3  | 1 | 9    | 12.5 | 2 | 2 | 2 | 2 |
| 46 | 35.0032  | 12 | 2 | 9    | 12   | 2 | 1 | 2 | 2 |
| 47 | 24.69136 | 5  | 1 | 14   | 20   | 2 | 2 | 2 | 2 |
| 48 | 18.87755 | 5  | 2 | 6.5  | 7    | 2 | 2 | 2 | 2 |
| 49 | 29.96433 | 1  | 2 | 7    | 7    | 2 | 2 | 2 | 1 |
| 50 | 27.77227 | 6  | 2 | 7    | 9    | 2 | 2 | 2 | 2 |
| 51 | 29.96433 | 7  | 1 | 16   | 26   | 2 | 1 | 2 | 1 |

|    |          |     |   |      |       |   |   |   |   |
|----|----------|-----|---|------|-------|---|---|---|---|
| 1  |          |     |   |      |       |   |   |   |   |
| 2  | 28.76397 | 1   | 2 | 4    | 6     | 2 | 2 | 2 | 1 |
| 3  | 24.73246 | 1   | 2 | 8    | 12    | 2 | 2 | 2 | 2 |
| 4  | 25.39063 | 2   | 2 | 5.1  | 13    | 2 | 2 | 2 | 1 |
| 5  | 25       | 12  | 2 | 6    | 10    | 2 | 1 | 2 | 1 |
| 6  | 20.68515 | 7   | 1 | 13   | 17    | 2 | 2 | 1 | 1 |
| 7  | 20.88889 | 12  | 2 | 3    | 6     | 2 | 1 | 2 | 1 |
| 8  | 23.92569 | 12  | 2 | 9    | 16    | 2 | 2 | 1 | 1 |
| 9  | 23.01118 | 15  | 1 | 8    | 10    | 2 | 1 | 2 | 1 |
| 10 | 22.76944 | 3   | 2 | 6    | 7     | 2 | 2 | 1 | 1 |
| 11 | 24.88889 | 3   | 2 | 12.1 | 16.2  | 2 | 2 | 2 | 2 |
| 12 | 25.56611 | 5   | 2 | 12   | 16    | 2 | 2 | 2 | 1 |
| 13 | 25.29938 | 10  | 2 | 7    | 10    | 2 | 2 | 2 | 1 |
| 14 | 15.78878 | 2   | 2 | 15   | 25    | 2 | 2 | 2 | 1 |
| 15 | 23.37258 | 2   | 2 | 6    | 6     | 2 | 2 | 2 | 1 |
| 16 | 26.50212 | 12  | 2 | 10   | 10    | 2 | 2 | 2 | 1 |
| 17 | 26.43807 | 1   | 2 | 8    | 10    | 2 | 2 | 2 | 1 |
| 18 | 28.84153 | 2   | 1 | 12   | 17    | 2 | 1 | 2 | 1 |
| 19 | 27.11111 | 1   | 2 | 8.4  | 11.6  | 2 | 2 | 2 | 1 |
| 20 | 25.39063 | 5   | 2 | 8    | 10.8  | 2 | 2 | 2 | 1 |
| 21 | 16.88889 | 1   | 2 | 18.3 | 24    | 2 | 2 | 2 | 1 |
| 22 | 16.44444 | 2   | 1 | 4.8  | 6.6   | 2 | 2 | 2 | 1 |
| 23 | 18.97453 | 1   | 2 | 5.6  | 7     | 2 | 2 | 2 | 1 |
| 24 | 24.19649 | 1.5 | 2 | 7    | 9     | 2 | 2 | 2 | 1 |
| 25 | 27.70083 | 3   | 2 | 12   | 15    | 2 | 2 | 2 | 1 |
| 26 | 25.55941 | 3   | 2 | 16   | 18    | 2 | 2 | 2 | 1 |
| 27 | 31.11111 | 5   | 2 | 5    | 7     | 2 | 2 | 2 | 1 |
| 28 | 20.45184 | 3   | 2 | 10   | 13    | 2 | 2 | 2 | 1 |
| 29 | 28.53746 | 6   | 2 | 8    | 10    | 2 | 2 | 2 | 2 |
| 30 | 27.23922 | 4   | 1 | 7    | 9     | 2 | 2 | 2 | 1 |
| 31 | 28.88889 | 2   | 2 | 20   | 22.6  | 2 | 2 | 2 | 1 |
| 32 | 19.3414  | 9   | 2 | 16   | 18    | 2 | 2 | 2 | 1 |
| 33 | 23.11111 | 3   | 2 | 3    | 7     | 2 | 1 | 2 | 1 |
| 34 | 20.77562 | 17  | 1 | 12   | 15    | 2 | 2 | 2 | 1 |
| 35 | 24.9401  | 2   | 2 | 20   | 24    | 2 | 2 | 2 | 1 |
| 36 | 19.5006  | 10  | 2 | 8    | 11    | 2 | 2 | 2 | 2 |
| 37 | 20.66116 | 4   | 2 | 8    | 10    | 2 | 2 | 2 | 1 |
| 38 | 28.30533 | 4   | 2 | 5    | 7.2   | 2 | 2 | 2 | 1 |
| 39 | 27.30344 | 2   | 2 | 3    | 7.5   | 2 | 2 | 2 | 1 |
| 40 | 25.33308 | 2   | 2 | 8    | 11    | 2 | 2 | 2 | 1 |
| 41 | 20.44444 | 5   | 2 | 24   | 28.52 | 2 | 2 | 2 | 1 |
| 42 | 25.33308 | 8   | 2 | 3.1  | 8.6   | 2 | 2 | 2 | 1 |
| 43 | 29.16667 | 2   | 2 | 9    | 11    | 2 | 2 | 2 | 2 |
| 44 | 19.29012 | 2   | 2 | 9    | 11    | 2 | 2 | 2 | 1 |
| 45 | 24.7768  | 2   | 2 | 3.1  | 4.6   | 2 | 2 | 2 | 1 |
| 46 | 40.97222 | 2   | 2 | 10   | 11    | 2 | 2 | 2 | 1 |
| 47 | 26.74048 | 6   | 2 | 3.1  | 8.5   | 2 | 2 | 2 | 1 |
| 48 | 23.87512 | 6   | 2 | 5    | 6.4   | 2 | 2 | 2 | 2 |
| 49 | 24.38653 | 13  | 2 | 15   | 17    | 1 | 2 | 2 | 1 |
| 50 | 18.26151 | 1   | 2 | 9    | 12    | 2 | 2 | 2 | 1 |
| 51 | 40.97222 | 9   | 2 | 10   | 11    | 2 | 2 | 2 | 2 |

|    |          |    |   |      |      |   |   |   |   |
|----|----------|----|---|------|------|---|---|---|---|
| 1  |          |    |   |      |      |   |   |   |   |
| 2  | 23.30887 | 8  | 2 | 8    | 10   | 2 | 1 | 2 | 1 |
| 3  | 21.08281 | 3  | 1 | 10   | 11   | 2 | 2 | 2 | 1 |
| 4  | 21.82107 | 5  | 2 | 9    | 11   | 2 | 2 | 2 | 1 |
| 5  | 18.71804 | 8  | 1 | 4    | 8    | 2 | 2 | 2 | 1 |
| 6  | 16.87886 | 2  | 2 | 10   | 17   | 2 | 2 | 2 | 1 |
| 7  | 23.55556 | 20 | 1 | 11   | 14   | 2 | 2 | 2 | 1 |
| 8  | 24.87772 | 10 | 2 | 12   | 15   | 2 | 2 | 2 | 1 |
| 9  | 20.02884 | 2  | 2 | 5    | 6.4  | 2 | 2 | 2 | 1 |
| 10 | 17.14678 | 3  | 2 | 10   | 12   | 2 | 2 | 2 | 2 |
| 11 | 19.17458 | 3  | 2 | 4    | 6    | 2 | 2 | 2 | 1 |
| 12 | 24.88889 | 13 | 1 | 18   | 22   | 2 | 2 | 2 | 1 |
| 13 | 32.02909 | 4  | 1 | 10   | 12   | 2 | 2 | 2 | 1 |
| 14 | 24.32323 | 5  | 1 | 8    | 11   | 2 | 2 | 2 | 1 |
| 15 | 17.62538 | 12 | 1 | 8    | 12   | 2 | 2 | 2 | 1 |
| 16 | 19.14063 | 12 | 1 | 7    | 9    | 2 | 2 | 2 | 1 |
| 17 | 23.73996 | 25 | 2 | 18   | 20   | 2 | 2 | 2 | 1 |
| 18 | 22.83288 | 23 | 1 | 15   | 17   | 2 | 2 | 2 | 1 |
| 19 | 23.49524 | 8  | 2 | 5    | 7    | 2 | 2 | 2 | 1 |
| 20 | 26.53061 | 6  | 2 | 6    | 9    | 2 | 2 | 2 | 2 |
| 21 | 21.20845 | 10 | 1 | 9.8  | 14   | 2 | 2 | 2 | 1 |
| 22 | 25.78853 | 9  | 2 | 9    | 11   | 2 | 2 | 2 | 1 |
| 23 | 42.80618 | 1  | 2 | 5    | 7    | 2 | 2 | 2 | 1 |
| 24 | 24.97399 | 1  | 2 | 14   | 15   | 1 | 2 | 2 | 1 |
| 25 | 23.1405  | 2  | 1 | 17   | 21   | 1 | 1 | 2 | 1 |
| 26 | 25.91068 | 5  | 1 | 8    | 11   | 2 | 2 | 2 | 1 |
| 27 | 24.33748 | 1  | 2 | 6    | 7    | 2 | 2 | 2 | 1 |
| 28 | 22.10029 | 15 | 2 | 5    | 7    | 1 | 2 | 2 | 1 |
| 29 | 33.16327 | 13 | 2 | 5    | 8    | 2 | 2 | 2 | 1 |
| 30 | 17.26355 | 3  | 2 | 8    | 10   | 1 | 2 | 2 | 1 |
| 31 | 23.82813 | 5  | 2 | 11   | 15   | 2 | 2 | 2 | 2 |
| 32 | 24.55775 | 2  | 1 | 8    | 10   | 2 | 2 | 2 | 1 |
| 33 | 22.22222 | 12 | 1 | 6    | 9    | 2 | 2 | 2 | 2 |
| 34 | 20       | 1  | 2 | 8    | 12   | 1 | 2 | 1 | 1 |
| 35 | 31.25    | 3  | 2 | 7    | 9    | 2 | 2 | 2 | 1 |
| 36 | 14.09846 | 2  | 1 | 11   | 15   | 2 | 2 | 2 | 1 |
| 37 | 27.0538  | 28 | 1 | 17   | 19   | 2 | 2 | 2 | 2 |
| 38 | 23.1405  | 1  | 2 | 12   | 15   | 2 | 2 | 2 | 1 |
| 39 | 21.91381 | 1  | 1 | 4    | 6    | 2 | 2 | 2 | 1 |
| 40 | 23.37258 | 3  | 2 | 6.2  | 8.3  | 2 | 2 | 2 | 1 |
| 41 | 23.14815 | 5  | 2 | 4.2  | 6.4  | 2 | 1 | 2 | 1 |
| 42 | 20.17264 | 2  | 2 | 7.8  | 9.7  | 2 | 2 | 2 | 2 |
| 43 | 24.45606 | 12 | 1 | 6.5  | 8.2  | 2 | 1 | 2 | 2 |
| 44 | 15.75575 | 5  | 1 | 6.7  | 9.1  | 2 | 2 | 2 | 1 |
| 45 | 24.74745 | 22 | 1 | 6.1  | 12.4 | 2 | 2 | 2 | 1 |
| 46 | 25.20479 | 6  | 2 | 10.5 | 15.3 | 2 | 2 | 1 | 1 |
| 47 | 23.73866 | 2  | 1 | 10.8 | 14.6 | 2 | 2 | 2 | 1 |
| 48 | 25.5367  | 3  | 2 | 6.2  | 8.1  | 2 | 2 | 2 | 1 |
| 49 | 24.44444 | 2  | 2 | 6.8  | 8.1  | 1 | 2 | 2 | 1 |
| 50 | 23.8054  | 1  | 1 | 6.2  | 9.7  | 2 | 1 | 2 | 1 |
| 51 | 21.40309 | 3  | 2 | 5.8  | 9.7  | 2 | 2 | 2 | 1 |

|    |          |    |   |      |      |   |   |   |   |
|----|----------|----|---|------|------|---|---|---|---|
| 1  |          |    |   |      |      |   |   |   |   |
| 2  | 25.5367  | 4  | 2 | 10.8 | 18.7 | 2 | 1 | 1 | 1 |
| 3  | 28.99931 | 5  | 2 | 5.3  | 8.5  | 1 | 2 | 2 | 1 |
| 4  | 23.23346 | 15 | 2 | 6.3  | 7.6  | 2 | 2 | 2 | 1 |
| 5  | 25.63692 | 3  | 2 | 18.1 | 24.1 | 2 | 2 | 2 | 1 |
| 6  | 26.22222 | 14 | 1 | 9.8  | 15.9 | 2 | 2 | 2 | 1 |
| 7  | 26.40236 | 3  | 2 | 5.2  | 6.3  | 2 | 2 | 2 | 1 |
| 8  | 29.04866 | 3  | 1 | 8.8  | 15.5 | 2 | 2 | 2 | 1 |
| 9  | 29.09428 | 8  | 2 | 8.2  | 11   | 2 | 2 | 2 | 1 |
| 10 | 19.81405 | 1  | 2 | 6.2  | 9.9  | 1 | 1 | 2 | 1 |
| 11 | 25.07716 | 3  | 2 | 6.2  | 9.4  | 2 | 1 | 1 | 1 |
| 12 | 24.03441 | 9  | 2 | 6.8  | 10   | 2 | 2 | 2 | 1 |
| 13 | 22.77319 | 1  | 2 | 6.2  | 8.5  | 2 | 2 | 2 | 1 |
| 14 | 24.91077 | 11 | 2 | 17   | 22.7 | 2 | 2 | 2 | 1 |
| 15 | 25.63692 | 4  | 2 | 8.9  | 10.6 | 2 | 2 | 2 | 1 |
| 16 | 27.77671 | 1  | 2 | 6.2  | 8.8  | 2 | 2 | 2 | 1 |
| 17 | 20.41523 | 20 | 1 | 6.1  | 7.8  | 2 | 1 | 1 | 1 |
| 18 | 26.7094  | 6  | 2 | 9.8  | 11.5 | 2 | 2 | 1 | 1 |
| 19 | 18.13122 | 4  | 1 | 9.1  | 12.6 | 2 | 2 | 1 | 1 |
| 20 | 21.77844 | 2  | 1 | 17.6 | 26.4 | 2 | 2 | 1 | 1 |
| 21 | 22.86253 | 25 | 1 | 14.2 | 18.2 | 1 | 1 | 1 | 1 |
| 22 | 22.81293 | 12 | 1 | 6.3  | 9.5  | 2 | 1 | 2 | 1 |
| 23 | 23.4375  | 11 | 2 | 9.8  | 13.7 | 2 | 1 | 1 | 1 |
| 24 | 30.7574  | 15 | 1 | 6.1  | 8.4  | 2 | 2 | 2 | 1 |
| 25 | 24.6755  | 7  | 2 | 6.7  | 11   | 2 | 2 | 1 | 1 |
| 26 | 18.09034 | 5  | 2 | 6.2  | 10   | 2 | 2 | 2 | 1 |
| 27 | 26.40236 | 7  | 2 | 5.8  | 7.7  | 2 | 2 | 1 | 1 |
| 28 | 20.3428  | 3  | 2 | 10   | 12.8 | 2 | 2 | 2 | 1 |
| 29 | 32.45472 | 1  | 2 | 5    | 6    | 2 | 2 | 2 | 1 |
| 30 | 28.76397 | 8  | 2 | 12   | 19   | 2 | 2 | 2 | 2 |
| 31 | 25.33333 | 6  | 1 | 8    | 17   | 2 | 2 | 1 | 1 |
| 32 | 28       | 5  | 1 | 8.7  | 6    | 2 | 2 | 1 | 2 |
| 33 | 48.65917 | 9  | 2 | 7    | 14   | 2 | 2 | 1 | 1 |
| 34 | 24.57787 | 3  | 2 | 7    | 9    | 1 | 2 | 2 | 1 |
| 35 | 22.6659  | 11 | 2 | 7    | 11   | 2 | 2 | 2 | 1 |
| 36 | 26.66667 | 6  | 2 | 5    | 8    | 2 | 1 | 2 | 1 |
| 37 | 22.07108 | 10 | 2 | 5    | 11   | 2 | 2 | 2 | 1 |
| 38 | 28.88889 | 20 | 1 | 9    | 13   | 2 | 2 | 1 | 1 |
| 39 | 28.13366 | 1  | 2 | 8.6  | 7    | 2 | 2 | 2 | 1 |
| 40 | 24.11265 | 1  | 1 | 10   | 5    | 2 | 2 | 2 | 1 |
| 41 | 29.86496 | 4  | 2 | 10   | 5    | 2 | 2 | 2 | 1 |
| 42 | 23.61275 | 2  | 2 | 7    | 10   | 2 | 2 | 2 | 1 |
| 43 | 19.69267 | 12 | 1 | 9    | 14   | 2 | 2 | 2 | 2 |
| 44 | 23.78121 | 4  | 2 | 6    | 8    | 2 | 2 | 1 | 2 |
| 45 | 22.5183  | 20 | 2 | 7    | 10   | 2 | 2 | 2 | 1 |
| 46 | 23.73866 | 8  | 1 | 7    | 10   | 1 | 2 | 1 | 2 |
| 47 | 22.60026 | 17 | 1 | 12   | 14   | 2 | 2 | 2 | 1 |
| 48 | 24.7768  | 10 | 2 | 6    | 24   | 2 | 2 | 2 | 1 |
| 49 | 30.70041 | 1  | 1 | 16.2 | 18.9 | 2 | 2 | 1 | 1 |
| 50 | 31.20256 | 7  | 2 | 6.2  | 9.8  | 2 | 2 | 1 | 1 |
| 51 | 48.07256 | 1  | 2 | 8.6  | 11.9 | 2 | 2 | 2 | 1 |

|    |          |    |   |      |      |   |   |   |   |
|----|----------|----|---|------|------|---|---|---|---|
| 1  |          |    |   |      |      |   |   |   |   |
| 2  | 22.81293 | 1  | 2 | 8.9  | 13.8 | 2 | 2 | 1 | 1 |
| 3  | 23.72529 | 2  | 1 | 5.6  | 7    | 2 | 2 | 2 | 1 |
| 4  | 17.77778 | 12 | 1 | 10.8 | 23.8 | 2 | 2 | 2 | 1 |
| 5  | 18.25632 | 1  | 2 | 7.4  | 10.9 | 2 | 1 | 2 | 1 |
| 6  | 17.84336 | 7  | 2 | 11.8 | 20.2 | 2 | 1 | 2 | 1 |
| 7  | 20.61313 | 3  | 2 | 5.2  | 7.1  | 2 | 2 | 1 | 1 |
| 8  | 25.5367  | 1  | 1 | 6.8  | 10.1 | 2 | 2 | 2 | 1 |
| 9  | 26.95313 | 1  | 1 | 8.7  | 11.5 | 2 | 2 | 2 | 1 |
| 10 | 20       | 6  | 2 | 5.2  | 7.6  | 2 | 2 | 2 | 1 |
| 11 | 29.89969 | 1  | 2 | 6.7  | 8.8  | 2 | 2 | 2 | 1 |
| 12 | 29.09428 | 2  | 2 | 7.8  | 10.4 | 2 | 2 | 1 | 1 |
| 13 | 20.77562 | 1  | 2 | 8.5  | 21.1 | 2 | 1 | 2 | 1 |
| 14 | 27.43484 | 1  | 2 | 6.9  | 8.8  | 2 | 2 | 1 | 1 |
| 15 | 16.46436 | 12 | 1 | 21.2 | 24.2 | 1 | 2 | 1 | 1 |
| 16 | 21.08281 | 5  | 2 | 12.4 | 17   | 2 | 2 | 1 | 1 |
| 17 | 31.64429 | 12 | 2 | 10.4 | 15   | 2 | 1 | 1 | 1 |
| 18 | 35.14273 | 4  | 2 | 6.3  | 9.4  | 2 | 1 | 2 | 2 |
| 19 | 19.53125 | 1  | 1 | 10   | 13   | 1 | 2 | 1 | 1 |
| 20 | 27.83029 | 7  | 2 | 10.9 | 13.8 | 2 | 2 | 1 | 1 |
| 21 | 16.44444 | 5  | 2 | 6    | 7.7  | 2 | 1 | 2 | 1 |
| 22 | 22.58271 | 2  | 2 | 6.7  | 10.4 | 1 | 1 | 2 | 1 |
| 23 | 21.64127 | 1  | 1 | 5.7  | 9.3  | 2 | 2 | 1 | 1 |
| 24 | 24.97399 | 8  | 2 | 9    | 10   | 2 | 2 | 2 | 1 |
| 25 | 20.07775 | 2  | 1 | 10.5 | 15.4 | 2 | 2 | 1 | 1 |
| 26 | 27.40766 | 2  | 2 | 12   | 14   | 2 | 2 | 2 | 1 |
| 27 | 27.20961 | 4  | 2 | 5.5  | 6.6  | 2 | 2 | 1 | 1 |
| 28 | 19.55556 | 1  | 2 | 5.8  | 8.9  | 2 | 2 | 1 | 2 |
| 29 | 26.14269 | 3  | 2 | 9.4  | 14.3 | 2 | 2 | 1 | 1 |
| 30 | 32.43945 | 2  | 2 | 6.2  | 9.5  | 2 | 2 | 1 | 2 |
| 31 | 26.37024 | 3  | 2 | 9.8  | 13.3 | 2 | 2 | 1 | 1 |
| 32 | 20.88889 | 12 | 1 | 10.1 | 14.6 | 2 | 2 | 1 | 1 |
| 33 | 27.26801 | 1  | 2 | 6    | 11.4 | 2 | 2 | 1 | 1 |
| 34 | 19.17458 | 1  | 2 | 6    | 8.4  | 2 | 2 | 1 | 1 |
| 35 | 23.42209 | 2  | 1 | 6.8  | 12.5 | 2 | 2 | 1 | 1 |
| 36 | 26.83865 | 19 | 2 | 8.9  | 13.9 | 2 | 2 | 2 | 1 |
| 37 | 23.63403 | 12 | 2 | 10   | 12.2 | 2 | 2 | 2 | 1 |
| 38 | 19.56295 | 1  | 2 | 16.2 | 20.5 | 2 | 1 | 2 | 1 |
| 39 | 29.77778 | 10 | 1 | 6    | 8.8  | 2 | 2 | 2 | 1 |
| 40 | 21.21914 | 3  | 1 | 11.6 | 19.6 | 2 | 1 | 2 | 1 |
| 41 | 15.82216 | 1  | 2 | 8.8  | 15.6 | 2 | 1 | 2 | 1 |
| 42 | 27.43484 | 4  | 2 | 10.8 | 15.4 | 1 | 2 | 2 | 2 |
| 43 | 30.76923 | 7  | 1 | 11.6 | 18.2 | 2 | 2 | 2 | 2 |
| 44 | 24.21875 | 1  | 1 | 9    | 10   | 1 | 2 | 2 | 1 |
| 45 | 25.39063 | 6  | 2 | 6.5  | 7.9  | 1 | 1 | 2 | 1 |
| 46 | 21.82107 | 7  | 2 | 5.4  | 6.4  | 2 | 2 | 2 | 1 |
| 47 | 23.23346 | 7  | 2 | 4.5  | 9.3  | 2 | 1 | 1 | 1 |
| 48 | 33.77744 | 2  | 2 | 6.1  | 7.2  | 2 | 2 | 1 | 1 |
| 49 | 27.04082 | 4  | 2 | 5.9  | 6.5  | 2 | 2 | 1 | 1 |
| 50 | 29.15452 | 20 | 2 | 8.9  | 11   | 2 | 1 | 2 | 1 |
| 51 | 24.87772 | 5  | 2 | 6.6  | 7.7  | 2 | 1 | 2 | 1 |

|    |          |   |   |     |    |   |   |   |   |
|----|----------|---|---|-----|----|---|---|---|---|
| 1  |          |   |   |     |    |   |   |   |   |
| 2  | 32.04615 | 2 | 2 | 5.7 | 10 | 2 | 1 | 2 | 1 |
| 3  |          |   |   |     |    |   |   |   |   |
| 4  |          |   |   |     |    |   |   |   |   |
| 5  |          |   |   |     |    |   |   |   |   |
| 6  |          |   |   |     |    |   |   |   |   |
| 7  |          |   |   |     |    |   |   |   |   |
| 8  |          |   |   |     |    |   |   |   |   |
| 9  |          |   |   |     |    |   |   |   |   |
| 10 |          |   |   |     |    |   |   |   |   |
| 11 |          |   |   |     |    |   |   |   |   |
| 12 |          |   |   |     |    |   |   |   |   |
| 13 |          |   |   |     |    |   |   |   |   |
| 14 |          |   |   |     |    |   |   |   |   |
| 15 |          |   |   |     |    |   |   |   |   |
| 16 |          |   |   |     |    |   |   |   |   |
| 17 |          |   |   |     |    |   |   |   |   |
| 18 |          |   |   |     |    |   |   |   |   |
| 19 |          |   |   |     |    |   |   |   |   |
| 20 |          |   |   |     |    |   |   |   |   |
| 21 |          |   |   |     |    |   |   |   |   |
| 22 |          |   |   |     |    |   |   |   |   |
| 23 |          |   |   |     |    |   |   |   |   |
| 24 |          |   |   |     |    |   |   |   |   |
| 25 |          |   |   |     |    |   |   |   |   |
| 26 |          |   |   |     |    |   |   |   |   |
| 27 |          |   |   |     |    |   |   |   |   |
| 28 |          |   |   |     |    |   |   |   |   |
| 29 |          |   |   |     |    |   |   |   |   |
| 30 |          |   |   |     |    |   |   |   |   |
| 31 |          |   |   |     |    |   |   |   |   |
| 32 |          |   |   |     |    |   |   |   |   |
| 33 |          |   |   |     |    |   |   |   |   |
| 34 |          |   |   |     |    |   |   |   |   |
| 35 |          |   |   |     |    |   |   |   |   |
| 36 |          |   |   |     |    |   |   |   |   |
| 37 |          |   |   |     |    |   |   |   |   |
| 38 |          |   |   |     |    |   |   |   |   |
| 39 |          |   |   |     |    |   |   |   |   |
| 40 |          |   |   |     |    |   |   |   |   |
| 41 |          |   |   |     |    |   |   |   |   |
| 42 |          |   |   |     |    |   |   |   |   |
| 43 |          |   |   |     |    |   |   |   |   |
| 44 |          |   |   |     |    |   |   |   |   |
| 45 |          |   |   |     |    |   |   |   |   |
| 46 |          |   |   |     |    |   |   |   |   |
| 47 |          |   |   |     |    |   |   |   |   |
| 48 |          |   |   |     |    |   |   |   |   |
| 49 |          |   |   |     |    |   |   |   |   |
| 50 |          |   |   |     |    |   |   |   |   |
| 51 |          |   |   |     |    |   |   |   |   |
| 52 |          |   |   |     |    |   |   |   |   |
| 53 |          |   |   |     |    |   |   |   |   |
| 54 |          |   |   |     |    |   |   |   |   |
| 55 |          |   |   |     |    |   |   |   |   |
| 56 |          |   |   |     |    |   |   |   |   |
| 57 |          |   |   |     |    |   |   |   |   |
| 58 |          |   |   |     |    |   |   |   |   |
| 59 |          |   |   |     |    |   |   |   |   |
| 60 |          |   |   |     |    |   |   |   |   |

For peer review only

|    | 1_HO_traui_foot_care_self_foot_ε | HTN | Q53_DRetirQ54_DNep | PN | PAD | Deformity |
|----|----------------------------------|-----|--------------------|----|-----|-----------|
| 1  |                                  |     |                    |    |     |           |
| 2  |                                  |     |                    |    |     |           |
| 3  | 2                                | 1   | 2                  | 1  | 2   | 1         |
| 4  | 2                                | 1   | 1                  | 2  | 2   | 1         |
| 5  | 2                                | 1   | 2                  | 2  | 2   | 2         |
| 6  | 2                                | 1   | 1                  | 1  | 2   | 1         |
| 7  | 2                                | 1   | 1                  | 2  | 2   | 1         |
| 8  | 2                                | 1   | 1                  | 2  | 2   | 2         |
| 9  | 2                                | 1   | 1                  | 2  | 2   | 2         |
| 10 | 2                                | 1   | 2                  | 1  | 2   | 1         |
| 11 | 1                                | 1   | 2                  | 2  | 1   | 2         |
| 12 | 2                                | 1   | 1                  | 1  | 2   | 1         |
| 13 | 2                                | 1   | 1                  | 2  | 2   | 2         |
| 14 | 2                                | 1   | 1                  | 2  | 1   | 2         |
| 15 | 2                                | 1   | 1                  | 2  | 1   | 2         |
| 16 | 2                                | 1   | 2                  | 1  | 2   | 2         |
| 17 | 2                                | 1   | 2                  | 2  | 1   | 2         |
| 18 | 2                                | 1   | 1                  | 1  | 2   | 2         |
| 19 | 2                                | 1   | 2                  | 2  | 1   | 1         |
| 20 | 2                                | 1   | 2                  | 2  | 1   | 1         |
| 21 | 2                                | 1   | 1                  | 2  | 2   | 1         |
| 22 | 2                                | 2   | 2                  | 2  | 2   | 2         |
| 23 | 2                                | 1   | 2                  | 2  | 2   | 1         |
| 24 | 2                                | 1   | 2                  | 2  | 2   | 2         |
| 25 | 2                                | 1   | 2                  | 2  | 1   | 1         |
| 26 | 2                                | 1   | 2                  | 2  | 1   | 1         |
| 27 | 2                                | 1   | 2                  | 2  | 2   | 1         |
| 28 | 2                                | 1   | 2                  | 2  | 2   | 1         |
| 29 | 2                                | 2   | 2                  | 2  | 1   | 2         |
| 30 | 2                                | 1   | 1                  | 2  | 2   | 2         |
| 31 | 2                                | 1   | 1                  | 2  | 2   | 2         |
| 32 | 1                                | 1   | 1                  | 2  | 2   | 2         |
| 33 | 2                                | 1   | 1                  | 2  | 2   | 2         |
| 34 | 2                                | 2   | 2                  | 2  | 2   | 1         |
| 35 | 1                                | 1   | 1                  | 2  | 2   | 2         |
| 36 | 2                                | 1   | 1                  | 2  | 1   | 1         |
| 37 | 2                                | 2   | 2                  | 2  | 2   | 2         |
| 38 | 2                                | 1   | 1                  | 2  | 2   | 1         |
| 39 | 2                                | 1   | 2                  | 2  | 2   | 1         |
| 40 | 2                                | 1   | 2                  | 2  | 2   | 1         |
| 41 | 1                                | 1   | 1                  | 2  | 2   | 2         |
| 42 | 2                                | 2   | 2                  | 2  | 2   | 1         |
| 43 | 2                                | 1   | 1                  | 2  | 2   | 1         |
| 44 | 2                                | 1   | 2                  | 1  | 2   | 1         |
| 45 | 2                                | 1   | 2                  | 2  | 2   | 2         |
| 46 | 2                                | 1   | 2                  | 2  | 2   | 2         |
| 47 | 1                                | 2   | 2                  | 1  | 2   | 1         |
| 48 | 2                                | 1   | 1                  | 2  | 1   | 2         |
| 49 | 2                                | 1   | 2                  | 2  | 2   | 2         |
| 50 | 2                                | 1   | 2                  | 2  | 2   | 2         |
| 51 | 2                                | 1   | 2                  | 2  | 2   | 2         |
| 52 | 2                                | 1   | 2                  | 1  | 2   | 2         |
| 53 | 2                                | 1   | 1                  | 1  | 2   | 2         |
| 54 | 2                                | 1   | 2                  | 2  | 2   | 1         |
| 55 | 2                                | 1   | 1                  | 1  | 2   | 1         |
| 56 | 1                                | 1   | 2                  | 2  | 1   | 1         |
| 57 | 2                                | 1   | 1                  | 2  | 1   | 2         |
| 58 | 1                                | 1   | 2                  | 1  | 2   | 2         |
| 59 | 2                                | 1   | 1                  | 2  | 2   | 2         |
| 60 | 1                                | 1   | 2                  | 1  | 2   | 2         |
|    | 2                                | 1   | 2                  | 1  | 2   | 2         |



|    |   |   |   |   |   |   |   |   |   |
|----|---|---|---|---|---|---|---|---|---|
| 1  |   |   |   |   |   |   |   |   |   |
| 2  | 2 | 1 | 1 | 2 | 1 | 2 | 2 | 2 | 2 |
| 3  | 1 | 1 | 2 | 2 | 2 | 2 | 2 | 2 | 2 |
| 4  | 2 | 1 | 2 | 1 | 2 | 2 | 2 | 2 | 2 |
| 5  | 2 | 2 | 1 | 2 | 2 | 1 | 1 | 2 | 2 |
| 6  | 2 | 1 | 2 | 2 | 2 | 2 | 2 | 2 | 2 |
| 7  | 2 | 1 | 2 | 2 | 2 | 2 | 2 | 2 | 2 |
| 8  | 2 | 1 | 2 | 2 | 2 | 2 | 2 | 2 | 1 |
| 9  | 2 | 2 | 1 | 2 | 2 | 2 | 2 | 2 | 2 |
| 10 | 1 | 1 | 1 | 2 | 2 | 2 | 1 | 2 | 1 |
| 11 | 2 | 2 | 2 | 1 | 1 | 2 | 2 | 2 | 2 |
| 12 | 2 | 1 | 2 | 2 | 1 | 2 | 2 | 2 | 2 |
| 13 | 2 | 1 | 1 | 2 | 2 | 2 | 2 | 2 | 1 |
| 14 | 2 | 1 | 2 | 2 | 2 | 2 | 2 | 2 | 2 |
| 15 | 2 | 1 | 2 | 2 | 2 | 2 | 2 | 2 | 2 |
| 16 | 2 | 1 | 1 | 2 | 2 | 2 | 2 | 2 | 2 |
| 17 | 2 | 1 | 2 | 1 | 2 | 1 | 2 | 2 | 1 |
| 18 | 1 | 1 | 2 | 2 | 1 | 2 | 2 | 2 | 2 |
| 19 | 2 | 1 | 1 | 2 | 2 | 2 | 2 | 2 | 2 |
| 20 | 2 | 1 | 1 | 1 | 2 | 2 | 2 | 2 | 2 |
| 21 | 2 | 1 | 1 | 1 | 2 | 2 | 2 | 2 | 1 |
| 22 | 2 | 1 | 2 | 2 | 2 | 2 | 2 | 2 | 2 |
| 23 | 1 | 1 | 2 | 2 | 1 | 1 | 2 | 2 | 1 |
| 24 | 2 | 1 | 1 | 2 | 2 | 2 | 1 | 2 | 2 |
| 25 | 2 | 1 | 1 | 2 | 1 | 2 | 2 | 2 | 2 |
| 26 | 2 | 1 | 1 | 1 | 2 | 2 | 2 | 2 | 2 |
| 27 | 2 | 1 | 1 | 1 | 2 | 2 | 2 | 2 | 2 |
| 28 | 2 | 1 | 2 | 2 | 2 | 2 | 2 | 2 | 1 |
| 29 | 2 | 1 | 2 | 2 | 1 | 1 | 2 | 2 | 1 |
| 30 | 2 | 1 | 1 | 2 | 2 | 2 | 1 | 2 | 2 |
| 31 | 2 | 1 | 2 | 2 | 2 | 2 | 2 | 2 | 1 |
| 32 | 2 | 1 | 2 | 2 | 2 | 2 | 2 | 2 | 1 |
| 33 | 2 | 1 | 2 | 2 | 2 | 2 | 2 | 2 | 1 |
| 34 | 2 | 1 | 1 | 2 | 2 | 2 | 2 | 2 | 2 |
| 35 | 1 | 1 | 2 | 2 | 2 | 2 | 1 | 2 | 2 |
| 36 | 2 | 1 | 2 | 2 | 1 | 1 | 2 | 2 | 1 |
| 37 | 2 | 1 | 1 | 2 | 2 | 2 | 2 | 2 | 2 |
| 38 | 2 | 1 | 1 | 2 | 2 | 2 | 2 | 2 | 2 |
| 39 | 1 | 1 | 2 | 2 | 2 | 2 | 1 | 2 | 2 |
| 40 | 2 | 2 | 1 | 2 | 2 | 2 | 2 | 2 | 2 |
| 41 | 2 | 1 | 1 | 2 | 2 | 2 | 2 | 2 | 2 |
| 42 | 2 | 1 | 1 | 1 | 2 | 2 | 2 | 2 | 2 |
| 43 | 2 | 1 | 1 | 2 | 1 | 2 | 2 | 2 | 2 |
| 44 | 2 | 1 | 1 | 2 | 2 | 2 | 2 | 2 | 1 |
| 45 | 2 | 2 | 2 | 2 | 2 | 2 | 2 | 2 | 1 |
| 46 | 2 | 2 | 2 | 2 | 2 | 2 | 2 | 2 | 1 |
| 47 | 2 | 1 | 1 | 2 | 2 | 2 | 2 | 2 | 2 |
| 48 | 2 | 1 | 1 | 2 | 2 | 2 | 2 | 2 | 2 |
| 49 | 2 | 1 | 1 | 2 | 2 | 2 | 2 | 2 | 1 |
| 50 | 2 | 1 | 1 | 2 | 2 | 2 | 2 | 2 | 1 |
| 51 | 2 | 1 | 1 | 1 | 1 | 2 | 2 | 2 | 1 |
| 52 | 2 | 1 | 1 | 1 | 1 | 2 | 2 | 2 | 1 |
| 53 | 2 | 1 | 1 | 1 | 1 | 2 | 1 | 2 | 1 |
| 54 | 1 | 1 | 1 | 2 | 1 | 2 | 2 | 2 | 1 |
| 55 | 2 | 1 | 2 | 1 | 2 | 2 | 2 | 2 | 1 |
| 56 | 2 | 2 | 2 | 2 | 1 | 2 | 1 | 2 | 2 |
| 57 | 2 | 1 | 2 | 2 | 1 | 2 | 2 | 2 | 1 |
| 58 | 2 | 2 | 1 | 1 | 2 | 2 | 2 | 2 | 1 |
| 59 | 2 | 2 | 1 | 1 | 2 | 2 | 2 | 2 | 1 |
| 60 | 2 | 1 | 1 | 2 | 2 | 2 | 2 | 2 | 2 |

|    |   |   |   |   |   |   |   |   |   |
|----|---|---|---|---|---|---|---|---|---|
| 1  |   |   |   |   |   |   |   |   |   |
| 2  | 2 | 2 | 2 | 2 | 1 | 2 | 2 | 2 | 1 |
| 3  | 2 | 2 | 2 | 1 | 1 | 2 | 2 | 2 | 2 |
| 4  | 1 | 1 | 2 | 1 | 1 | 2 | 1 | 2 | 2 |
| 5  | 2 | 1 | 2 | 1 | 2 | 2 | 2 | 2 | 2 |
| 6  | 2 | 2 | 2 | 2 | 1 | 2 | 2 | 2 | 2 |
| 7  | 2 | 1 | 2 | 2 | 2 | 2 | 2 | 2 | 1 |
| 8  | 2 | 2 | 2 | 2 | 1 | 2 | 2 | 2 | 1 |
| 9  | 2 | 1 | 1 | 2 | 2 | 2 | 2 | 2 | 2 |
| 10 | 2 | 2 | 2 | 2 | 2 | 2 | 1 | 2 | 1 |
| 11 | 2 | 1 | 2 | 2 | 2 | 2 | 2 | 2 | 1 |
| 12 | 2 | 1 | 2 | 2 | 1 | 2 | 2 | 2 | 1 |
| 13 | 2 | 1 | 2 | 2 | 2 | 1 | 2 | 2 | 1 |
| 14 | 2 | 1 | 1 | 2 | 1 | 1 | 1 | 2 | 1 |
| 15 | 2 | 1 | 2 | 2 | 2 | 2 | 1 | 2 | 1 |
| 16 | 2 | 1 | 2 | 2 | 2 | 2 | 2 | 2 | 1 |
| 17 | 2 | 2 | 2 | 1 | 2 | 2 | 1 | 2 | 2 |
| 18 | 2 | 2 | 2 | 2 | 2 | 2 | 2 | 2 | 2 |
| 19 | 2 | 1 | 2 | 2 | 1 | 2 | 2 | 2 | 2 |
| 20 | 2 | 2 | 2 | 2 | 2 | 2 | 2 | 2 | 1 |
| 21 | 2 | 1 | 2 | 2 | 2 | 2 | 2 | 2 | 1 |
| 22 | 2 | 1 | 1 | 1 | 1 | 2 | 2 | 2 | 1 |
| 23 | 1 | 1 | 1 | 2 | 2 | 2 | 2 | 2 | 1 |
| 24 | 1 | 1 | 1 | 2 | 1 | 2 | 2 | 2 | 1 |
| 25 | 1 | 1 | 2 | 2 | 2 | 2 | 2 | 2 | 2 |
| 26 | 2 | 1 | 1 | 1 | 1 | 2 | 2 | 2 | 2 |
| 27 | 2 | 1 | 1 | 2 | 2 | 2 | 2 | 2 | 2 |
| 28 | 2 | 1 | 1 | 2 | 2 | 2 | 2 | 2 | 2 |
| 29 | 2 | 1 | 2 | 2 | 2 | 2 | 2 | 2 | 2 |
| 30 | 2 | 1 | 1 | 2 | 1 | 2 | 2 | 2 | 1 |
| 31 | 2 | 1 | 2 | 2 | 2 | 2 | 2 | 2 | 1 |
| 32 | 2 | 1 | 2 | 2 | 2 | 2 | 2 | 2 | 1 |
| 33 | 2 | 1 | 2 | 2 | 2 | 2 | 1 | 2 | 1 |
| 34 | 2 | 1 | 1 | 1 | 1 | 2 | 1 | 2 | 2 |
| 35 | 2 | 1 | 1 | 2 | 2 | 2 | 2 | 2 | 2 |
| 36 | 2 | 1 | 1 | 2 | 2 | 2 | 2 | 2 | 2 |
| 37 | 2 | 1 | 1 | 2 | 2 | 2 | 2 | 2 | 1 |
| 38 | 1 | 1 | 1 | 2 | 2 | 2 | 2 | 2 | 2 |
| 39 | 2 | 1 | 1 | 2 | 2 | 2 | 1 | 2 | 2 |
| 40 | 2 | 1 | 1 | 2 | 2 | 2 | 2 | 2 | 1 |
| 41 | 2 | 1 | 1 | 2 | 2 | 2 | 2 | 2 | 2 |
| 42 | 2 | 1 | 1 | 2 | 1 | 1 | 2 | 2 | 2 |
| 43 | 2 | 1 | 1 | 2 | 2 | 2 | 1 | 2 | 1 |
| 44 | 1 | 1 | 1 | 2 | 2 | 2 | 2 | 2 | 2 |
| 45 | 2 | 1 | 2 | 2 | 2 | 2 | 1 | 2 | 2 |
| 46 | 2 | 1 | 1 | 1 | 1 | 1 | 2 | 2 | 2 |
| 47 | 2 | 1 | 2 | 1 | 2 | 2 | 2 | 2 | 2 |
| 48 | 2 | 1 | 2 | 2 | 2 | 2 | 2 | 2 | 1 |
| 49 | 2 | 1 | 2 | 2 | 2 | 2 | 2 | 2 | 2 |
| 50 | 2 | 1 | 2 | 2 | 2 | 2 | 2 | 2 | 1 |
| 51 | 2 | 1 | 2 | 2 | 2 | 2 | 2 | 2 | 2 |
| 52 | 2 | 1 | 2 | 2 | 2 | 2 | 1 | 2 | 1 |
| 53 | 2 | 1 | 1 | 2 | 1 | 1 | 2 | 2 | 2 |
| 54 | 2 | 1 | 2 | 2 | 2 | 2 | 1 | 2 | 2 |
| 55 | 2 | 1 | 2 | 1 | 1 | 2 | 2 | 2 | 1 |
| 56 | 2 | 1 | 1 | 2 | 2 | 2 | 1 | 2 | 2 |
| 57 | 2 | 1 | 2 | 2 | 2 | 2 | 2 | 2 | 1 |
| 58 | 2 | 1 | 1 | 2 | 2 | 2 | 2 | 2 | 1 |
| 59 | 2 | 1 | 1 | 2 | 1 | 2 | 2 | 2 | 1 |
| 60 | 2 | 1 | 2 | 2 | 2 | 2 | 2 | 2 | 2 |

|    |   |   |   |   |   |   |   |   |   |
|----|---|---|---|---|---|---|---|---|---|
| 1  |   |   |   |   |   |   |   |   |   |
| 2  | 2 | 1 | 2 | 1 | 2 | 1 | 2 | 2 | 1 |
| 3  | 2 | 1 | 2 | 2 | 2 | 2 | 2 | 2 | 1 |
| 4  | 2 | 1 | 2 | 2 | 2 | 2 | 2 | 2 | 1 |
| 5  | 2 | 1 | 2 | 2 | 1 | 2 | 2 | 2 | 1 |
| 6  | 2 | 1 | 2 | 1 | 2 | 2 | 1 | 2 | 1 |
| 7  | 2 | 1 | 2 | 1 | 2 | 1 | 2 | 2 | 1 |
| 8  | 2 | 1 | 2 | 2 | 2 | 2 | 1 | 2 | 1 |
| 9  | 2 | 1 | 2 | 2 | 2 | 2 | 2 | 1 | 2 |
| 10 | 2 | 1 | 2 | 2 | 2 | 2 | 1 | 2 | 1 |
| 11 | 2 | 1 | 2 | 1 | 2 | 2 | 2 | 2 | 1 |
| 12 | 2 | 1 | 1 | 2 | 2 | 2 | 2 | 2 | 1 |
| 13 | 2 | 1 | 2 | 2 | 2 | 2 | 1 | 2 | 1 |
| 14 | 2 | 1 | 1 | 2 | 2 | 2 | 2 | 2 | 1 |
| 15 | 2 | 1 | 2 | 2 | 2 | 2 | 2 | 2 | 1 |
| 16 | 2 | 1 | 2 | 1 | 2 | 2 | 2 | 2 | 1 |
| 17 | 2 | 1 | 1 | 2 | 2 | 2 | 2 | 2 | 1 |
| 18 | 2 | 1 | 1 | 1 | 1 | 2 | 2 | 2 | 2 |
| 19 | 2 | 1 | 2 | 2 | 2 | 2 | 2 | 2 | 1 |
| 20 | 2 | 1 | 2 | 1 | 2 | 2 | 2 | 2 | 1 |
| 21 | 2 | 1 | 2 | 2 | 2 | 2 | 2 | 2 | 1 |
| 22 | 2 | 1 | 2 | 2 | 2 | 2 | 1 | 2 | 1 |
| 23 | 2 | 2 | 2 | 2 | 1 | 2 | 2 | 2 | 1 |
| 24 | 2 | 1 | 2 | 1 | 2 | 2 | 1 | 2 | 1 |
| 25 | 2 | 1 | 2 | 2 | 2 | 2 | 2 | 2 | 1 |
| 26 | 2 | 1 | 2 | 2 | 2 | 2 | 2 | 2 | 1 |
| 27 | 2 | 1 | 1 | 1 | 2 | 2 | 2 | 2 | 2 |
| 28 | 2 | 1 | 2 | 2 | 2 | 1 | 2 | 2 | 1 |
| 29 | 2 | 1 | 1 | 1 | 2 | 2 | 2 | 2 | 1 |
| 30 | 1 | 1 | 2 | 2 | 2 | 2 | 2 | 2 | 1 |
| 31 | 2 | 2 | 2 | 1 | 1 | 2 | 1 | 2 | 1 |
| 32 | 2 | 1 | 2 | 2 | 1 | 2 | 2 | 2 | 1 |
| 33 | 2 | 1 | 2 | 2 | 2 | 2 | 2 | 2 | 1 |
| 34 | 2 | 1 | 2 | 2 | 2 | 2 | 2 | 2 | 1 |
| 35 | 1 | 1 | 2 | 2 | 2 | 2 | 2 | 2 | 1 |
| 36 | 2 | 1 | 1 | 2 | 2 | 1 | 2 | 2 | 1 |
| 37 | 2 | 1 | 2 | 2 | 2 | 2 | 2 | 2 | 1 |
| 38 | 2 | 1 | 2 | 2 | 2 | 2 | 2 | 2 | 1 |
| 39 | 2 | 1 | 1 | 1 | 1 | 2 | 2 | 2 | 1 |
| 40 | 1 | 1 | 1 | 2 | 2 | 2 | 2 | 2 | 1 |
| 41 | 2 | 1 | 2 | 2 | 2 | 2 | 2 | 2 | 1 |
| 42 | 2 | 1 | 2 | 2 | 2 | 2 | 1 | 2 | 1 |
| 43 | 2 | 1 | 2 | 2 | 1 | 2 | 2 | 2 | 1 |
| 44 | 1 | 1 | 1 | 2 | 2 | 2 | 2 | 2 | 1 |
| 45 | 1 | 2 | 2 | 2 | 2 | 2 | 2 | 2 | 1 |
| 46 | 2 | 1 | 2 | 2 | 1 | 2 | 1 | 2 | 2 |
| 47 | 2 | 1 | 1 | 2 | 2 | 2 | 2 | 2 | 1 |
| 48 | 1 | 2 | 2 | 2 | 2 | 2 | 1 | 2 | 1 |
| 49 | 2 | 1 | 2 | 2 | 2 | 2 | 2 | 2 | 1 |
| 50 | 2 | 1 | 2 | 2 | 2 | 2 | 2 | 2 | 1 |
| 51 | 2 | 1 | 2 | 2 | 2 | 2 | 2 | 2 | 1 |
| 52 | 2 | 1 | 1 | 2 | 2 | 2 | 2 | 2 | 1 |
| 53 | 2 | 1 | 1 | 2 | 2 | 2 | 2 | 2 | 1 |
| 54 | 2 | 1 | 1 | 2 | 2 | 2 | 2 | 2 | 2 |
| 55 | 2 | 1 | 1 | 2 | 2 | 2 | 2 | 2 | 2 |
| 56 | 2 | 1 | 2 | 2 | 2 | 2 | 2 | 2 | 1 |
| 57 | 2 | 1 | 2 | 2 | 2 | 2 | 2 | 2 | 2 |
| 58 | 2 | 1 | 1 | 2 | 1 | 2 | 2 | 2 | 1 |
| 59 | 2 | 2 | 2 | 2 | 2 | 2 | 2 | 2 | 1 |
| 60 | 2 | 2 | 2 | 2 | 2 | 2 | 2 | 2 | 1 |

|    |   |   |   |   |   |   |   |   |   |
|----|---|---|---|---|---|---|---|---|---|
| 1  |   |   |   |   |   |   |   |   |   |
| 2  | 2 | 1 | 2 | 2 | 2 | 1 | 1 | 2 | 1 |
| 3  | 2 | 1 | 1 | 2 | 2 | 1 | 2 | 2 | 2 |
| 4  | 1 | 2 | 1 | 2 | 1 | 1 | 2 | 2 | 1 |
| 5  | 1 | 2 | 1 | 2 | 2 | 1 | 2 | 2 | 1 |
| 6  | 2 | 1 | 2 | 2 | 2 | 2 | 1 | 2 | 1 |
| 7  | 2 | 1 | 2 | 2 | 2 | 1 | 1 | 2 | 1 |
| 8  | 2 | 1 | 2 | 2 | 1 | 1 | 2 | 2 | 1 |
| 9  | 2 | 1 | 1 | 2 | 2 | 2 | 2 | 2 | 1 |
| 10 | 2 | 1 | 2 | 2 | 1 | 1 | 2 | 2 | 1 |
| 11 | 2 | 1 | 1 | 2 | 1 | 2 | 2 | 2 | 1 |
| 12 | 2 | 1 | 1 | 2 | 2 | 2 | 1 | 2 | 1 |
| 13 | 1 | 2 | 1 | 2 | 2 | 2 | 2 | 2 | 1 |
| 14 | 2 | 1 | 2 | 2 | 2 | 2 | 2 | 2 | 2 |
| 15 | 2 | 1 | 2 | 2 | 2 | 2 | 2 | 2 | 2 |
| 16 | 2 | 1 | 2 | 1 | 2 | 2 | 2 | 2 | 1 |
| 17 | 2 | 1 | 1 | 2 | 2 | 2 | 1 | 2 | 1 |
| 18 | 2 | 1 | 2 | 2 | 2 | 2 | 2 | 2 | 1 |
| 19 | 2 | 1 | 2 | 2 | 2 | 2 | 2 | 2 | 1 |
| 20 | 1 | 1 | 1 | 2 | 2 | 2 | 1 | 2 | 2 |
| 21 | 2 | 2 | 2 | 2 | 2 | 2 | 2 | 2 | 1 |
| 22 | 2 | 1 | 1 | 1 | 1 | 2 | 1 | 2 | 1 |
| 23 | 2 | 1 | 1 | 2 | 1 | 2 | 2 | 2 | 1 |
| 24 | 2 | 2 | 2 | 2 | 2 | 2 | 2 | 2 | 1 |
| 25 | 2 | 2 | 2 | 2 | 2 | 2 | 2 | 2 | 2 |
| 26 | 2 | 2 | 2 | 2 | 2 | 2 | 2 | 2 | 2 |
| 27 | 1 | 1 | 2 | 2 | 2 | 2 | 2 | 2 | 2 |
| 28 | 2 | 1 | 2 | 2 | 2 | 2 | 1 | 2 | 2 |
| 29 | 2 | 1 | 2 | 2 | 2 | 2 | 1 | 2 | 1 |
| 30 | 1 | 1 | 1 | 2 | 2 | 2 | 2 | 2 | 1 |
| 31 | 2 | 2 | 2 | 1 | 2 | 2 | 2 | 2 | 2 |
| 32 | 1 | 1 | 2 | 2 | 2 | 2 | 1 | 2 | 1 |
| 33 | 2 | 2 | 2 | 2 | 2 | 2 | 1 | 2 | 1 |
| 34 | 2 | 1 | 1 | 2 | 2 | 2 | 2 | 2 | 1 |
| 35 | 2 | 1 | 2 | 2 | 2 | 2 | 2 | 2 | 1 |
| 36 | 2 | 1 | 2 | 2 | 2 | 2 | 2 | 2 | 1 |
| 37 | 1 | 1 | 2 | 2 | 2 | 2 | 2 | 2 | 1 |
| 38 | 2 | 2 | 2 | 2 | 2 | 2 | 2 | 2 | 1 |
| 39 | 2 | 1 | 2 | 2 | 2 | 2 | 2 | 2 | 1 |
| 40 | 1 | 1 | 2 | 2 | 2 | 2 | 2 | 2 | 1 |
| 41 | 1 | 1 | 2 | 2 | 2 | 2 | 2 | 2 | 1 |
| 42 | 1 | 1 | 2 | 2 | 2 | 2 | 2 | 2 | 1 |
| 43 | 2 | 1 | 2 | 2 | 2 | 2 | 2 | 2 | 2 |
| 44 | 2 | 1 | 2 | 2 | 2 | 2 | 2 | 2 | 2 |
| 45 | 1 | 1 | 2 | 2 | 2 | 2 | 2 | 2 | 1 |
| 46 | 2 | 1 | 2 | 2 | 2 | 2 | 2 | 2 | 1 |
| 47 | 2 | 1 | 2 | 2 | 2 | 2 | 2 | 2 | 1 |
| 48 | 2 | 1 | 1 | 2 | 2 | 2 | 2 | 2 | 1 |
| 49 | 1 | 1 | 2 | 2 | 2 | 2 | 2 | 2 | 2 |
| 50 | 1 | 1 | 1 | 2 | 2 | 2 | 2 | 2 | 1 |
| 51 | 2 | 1 | 1 | 1 | 1 | 2 | 2 | 2 | 1 |
| 52 | 2 | 1 | 1 | 2 | 2 | 2 | 2 | 2 | 1 |
| 53 | 2 | 1 | 1 | 2 | 2 | 2 | 2 | 2 | 1 |
| 54 | 2 | 1 | 2 | 2 | 2 | 2 | 2 | 2 | 2 |
| 55 | 1 | 1 | 2 | 2 | 2 | 2 | 2 | 2 | 1 |
| 56 | 2 | 1 | 2 | 2 | 2 | 2 | 2 | 2 | 1 |
| 57 | 2 | 1 | 2 | 2 | 2 | 2 | 2 | 2 | 1 |
| 58 | 2 | 1 | 2 | 2 | 2 | 2 | 2 | 2 | 1 |
| 59 | 2 | 1 | 2 | 2 | 2 | 2 | 2 | 2 | 2 |
| 60 | 2 | 1 | 2 | 2 | 1 | 2 | 2 | 2 | 1 |

|    |   |   |   |   |   |   |   |   |   |
|----|---|---|---|---|---|---|---|---|---|
| 1  |   |   |   |   |   |   |   |   |   |
| 2  | 1 | 1 | 1 | 2 | 1 | 2 | 2 | 2 | 1 |
| 3  | 2 | 1 | 1 | 2 | 2 | 2 | 2 | 2 | 1 |
| 4  | 1 | 2 | 1 | 2 | 2 | 2 | 1 | 2 | 1 |
| 5  | 1 | 1 | 2 | 2 | 2 | 2 | 2 | 2 | 1 |
| 6  | 2 | 1 | 1 | 1 | 2 | 2 | 2 | 2 | 1 |
| 7  | 2 | 1 | 1 | 2 | 2 | 2 | 2 | 2 | 1 |
| 8  | 2 | 1 | 2 | 2 | 2 | 2 | 1 | 2 | 1 |
| 9  | 1 | 1 | 1 | 2 | 2 | 2 | 2 | 2 | 1 |
| 10 | 2 | 2 | 2 | 2 | 2 | 2 | 2 | 2 | 1 |
| 11 | 2 | 1 | 1 | 1 | 1 | 2 | 2 | 2 | 1 |
| 12 | 1 | 1 | 1 | 2 | 1 | 2 | 2 | 2 | 1 |
| 13 | 2 | 1 | 1 | 2 | 2 | 2 | 2 | 2 | 1 |
| 14 | 1 | 2 | 1 | 2 | 2 | 2 | 2 | 2 | 1 |
| 15 | 2 | 1 | 1 | 2 | 2 | 2 | 2 | 2 | 1 |
| 16 | 1 | 2 | 1 | 2 | 2 | 2 | 2 | 2 | 1 |
| 17 | 2 | 1 | 2 | 2 | 2 | 2 | 1 | 2 | 1 |
| 18 | 2 | 1 | 1 | 1 | 2 | 2 | 2 | 2 | 1 |
| 19 | 2 | 1 | 1 | 2 | 2 | 2 | 2 | 2 | 1 |
| 20 | 2 | 1 | 2 | 2 | 2 | 2 | 2 | 2 | 1 |
| 21 | 1 | 1 | 1 | 2 | 2 | 2 | 2 | 2 | 1 |
| 22 | 2 | 2 | 2 | 2 | 2 | 2 | 1 | 2 | 1 |
| 23 | 2 | 1 | 1 | 1 | 1 | 2 | 1 | 2 | 1 |
| 24 | 2 | 1 | 1 | 2 | 1 | 2 | 2 | 2 | 1 |
| 25 | 2 | 1 | 1 | 2 | 2 | 2 | 2 | 2 | 1 |
| 26 | 2 | 1 | 2 | 2 | 2 | 2 | 2 | 2 | 1 |
| 27 | 2 | 1 | 2 | 2 | 2 | 2 | 2 | 2 | 1 |
| 28 | 2 | 1 | 2 | 2 | 2 | 2 | 2 | 2 | 1 |
| 29 | 2 | 1 | 2 | 2 | 2 | 2 | 2 | 2 | 1 |
| 30 | 2 | 1 | 2 | 1 | 2 | 2 | 2 | 2 | 2 |
| 31 | 1 | 1 | 2 | 2 | 2 | 2 | 2 | 2 | 1 |
| 32 | 2 | 2 | 2 | 1 | 2 | 1 | 2 | 2 | 1 |
| 33 | 2 | 1 | 2 | 2 | 2 | 2 | 2 | 2 | 1 |
| 34 | 1 | 1 | 2 | 2 | 2 | 2 | 2 | 2 | 1 |
| 35 | 2 | 1 | 2 | 2 | 2 | 2 | 2 | 2 | 1 |
| 36 | 2 | 1 | 2 | 2 | 2 | 2 | 2 | 2 | 1 |
| 37 | 1 | 1 | 1 | 1 | 2 | 2 | 2 | 2 | 1 |
| 38 | 1 | 1 | 1 | 1 | 2 | 2 | 2 | 2 | 1 |
| 39 | 2 | 1 | 2 | 2 | 2 | 1 | 1 | 2 | 1 |
| 40 | 2 | 1 | 1 | 2 | 2 | 2 | 2 | 2 | 2 |
| 41 | 2 | 1 | 1 | 1 | 2 | 2 | 2 | 2 | 1 |
| 42 | 2 | 1 | 1 | 2 | 2 | 2 | 2 | 2 | 1 |
| 43 | 2 | 1 | 1 | 2 | 2 | 2 | 2 | 2 | 1 |
| 44 | 2 | 1 | 1 | 1 | 2 | 2 | 2 | 2 | 2 |
| 45 | 1 | 1 | 2 | 2 | 2 | 2 | 2 | 2 | 1 |
| 46 | 2 | 1 | 1 | 2 | 2 | 1 | 2 | 2 | 1 |
| 47 | 1 | 2 | 1 | 2 | 1 | 1 | 2 | 2 | 1 |
| 48 | 1 | 2 | 1 | 2 | 2 | 1 | 2 | 2 | 1 |
| 49 | 2 | 1 | 2 | 2 | 2 | 2 | 2 | 2 | 1 |
| 50 | 2 | 1 | 2 | 2 | 1 | 1 | 2 | 2 | 1 |
| 51 | 2 | 1 | 2 | 2 | 2 | 2 | 2 | 2 | 1 |
| 52 | 2 | 1 | 1 | 2 | 2 | 2 | 2 | 2 | 2 |
| 53 | 2 | 1 | 2 | 2 | 1 | 1 | 2 | 2 | 2 |
| 54 | 2 | 1 | 1 | 2 | 2 | 1 | 2 | 2 | 1 |
| 55 | 2 | 1 | 1 | 2 | 2 | 2 | 2 | 2 | 1 |
| 56 | 1 | 2 | 1 | 2 | 2 | 2 | 1 | 2 | 1 |
| 57 | 2 | 1 | 2 | 2 | 2 | 2 | 2 | 2 | 1 |
| 58 | 2 | 1 | 2 | 2 | 2 | 2 | 2 | 2 | 1 |
| 59 | 2 | 1 | 2 | 2 | 2 | 2 | 2 | 2 | 1 |
| 60 | 2 | 1 | 1 | 1 | 2 | 2 | 2 | 2 | 1 |

|    |   |   |   |   |   |   |   |   |   |
|----|---|---|---|---|---|---|---|---|---|
| 1  |   |   |   |   |   |   |   |   |   |
| 2  | 2 | 1 | 1 | 2 | 2 | 2 | 2 | 2 | 2 |
| 3  | 1 | 1 | 1 | 2 | 1 | 1 | 2 | 2 | 1 |
| 4  | 2 | 1 | 1 | 2 | 2 | 2 | 2 | 2 | 2 |
| 5  | 2 | 2 | 1 | 2 | 1 | 1 | 1 | 2 | 1 |
| 6  | 2 | 1 | 1 | 2 | 1 | 2 | 1 | 2 | 1 |
| 7  | 2 | 1 | 2 | 1 | 2 | 2 | 2 | 2 | 1 |
| 8  | 1 | 1 | 1 | 2 | 2 | 2 | 2 | 2 | 1 |
| 9  | 1 | 1 | 2 | 2 | 2 | 2 | 1 | 2 | 1 |
| 10 | 1 | 1 | 1 | 1 | 1 | 2 | 2 | 2 | 1 |
| 11 | 1 | 1 | 1 | 1 | 1 | 2 | 2 | 2 | 1 |
| 12 | 2 | 1 | 1 | 2 | 1 | 2 | 2 | 2 | 1 |
| 13 | 2 | 1 | 1 | 2 | 1 | 2 | 2 | 2 | 2 |
| 14 | 2 | 1 | 1 | 2 | 1 | 2 | 2 | 2 | 1 |
| 15 | 2 | 1 | 1 | 2 | 1 | 2 | 2 | 2 | 1 |
| 16 | 2 | 1 | 2 | 2 | 2 | 2 | 2 | 2 | 1 |
| 17 | 1 | 1 | 1 | 2 | 1 | 2 | 2 | 2 | 1 |
| 18 | 2 | 1 | 1 | 2 | 2 | 2 | 1 | 2 | 1 |
| 19 | 2 | 1 | 1 | 2 | 2 | 2 | 2 | 2 | 1 |
| 20 | 2 | 1 | 1 | 2 | 2 | 2 | 2 | 2 | 1 |
| 21 | 2 | 1 | 2 | 2 | 2 | 2 | 2 | 2 | 1 |
| 22 | 2 | 1 | 1 | 1 | 2 | 2 | 2 | 2 | 1 |
| 23 | 2 | 2 | 2 | 1 | 2 | 2 | 2 | 2 | 1 |
| 24 | 2 | 1 | 2 | 1 | 2 | 2 | 2 | 2 | 1 |
| 25 | 2 | 1 | 1 | 2 | 1 | 2 | 1 | 2 | 1 |
| 26 | 2 | 1 | 1 | 2 | 1 | 2 | 2 | 2 | 1 |
| 27 | 2 | 1 | 1 | 2 | 1 | 2 | 2 | 2 | 2 |
| 28 | 2 | 1 | 2 | 2 | 2 | 2 | 2 | 2 | 2 |
| 29 | 2 | 1 | 1 | 2 | 2 | 2 | 1 | 2 | 2 |
| 30 | 2 | 1 | 1 | 2 | 2 | 2 | 2 | 2 | 1 |
| 31 | 2 | 1 | 1 | 1 | 1 | 2 | 1 | 2 | 1 |
| 32 | 2 | 1 | 1 | 2 | 2 | 2 | 2 | 2 | 1 |
| 33 | 2 | 1 | 1 | 1 | 1 | 2 | 1 | 2 | 1 |
| 34 | 2 | 1 | 1 | 2 | 1 | 2 | 2 | 2 | 1 |
| 35 | 2 | 1 | 1 | 2 | 1 | 2 | 2 | 2 | 2 |
| 36 | 2 | 1 | 1 | 2 | 2 | 2 | 1 | 2 | 1 |
| 37 | 2 | 1 | 2 | 1 | 2 | 2 | 1 | 2 | 1 |
| 38 | 1 | 1 | 1 | 2 | 2 | 2 | 2 | 2 | 1 |
| 39 | 2 | 1 | 1 | 2 | 2 | 1 | 2 | 2 | 2 |
| 40 | 2 | 1 | 1 | 2 | 2 | 2 | 2 | 2 | 1 |
| 41 | 2 | 1 | 1 | 2 | 2 | 2 | 2 | 2 | 1 |
| 42 | 2 | 1 | 1 | 2 | 2 | 2 | 2 | 2 | 1 |
| 43 | 2 | 1 | 1 | 2 | 2 | 2 | 2 | 2 | 1 |
| 44 | 2 | 1 | 1 | 2 | 2 | 2 | 2 | 2 | 1 |
| 45 | 2 | 1 | 1 | 2 | 2 | 2 | 2 | 2 | 1 |
| 46 | 2 | 1 | 1 | 2 | 2 | 2 | 2 | 2 | 1 |
| 47 | 1 | 1 | 1 | 2 | 2 | 2 | 2 | 2 | 2 |
| 48 | 2 | 1 | 1 | 2 | 2 | 2 | 1 | 2 | 1 |
| 49 | 2 | 1 | 2 | 2 | 2 | 2 | 2 | 2 | 1 |
| 50 | 2 | 1 | 1 | 2 | 2 | 2 | 2 | 2 | 2 |
| 51 | 2 | 1 | 2 | 2 | 2 | 2 | 1 | 2 | 1 |
| 52 | 2 | 1 | 1 | 2 | 1 | 2 | 1 | 2 | 1 |
| 53 | 2 | 1 | 1 | 2 | 2 | 2 | 2 | 2 | 1 |
| 54 | 2 | 1 | 1 | 2 | 2 | 2 | 2 | 2 | 1 |
| 55 | 2 | 1 | 2 | 1 | 2 | 2 | 2 | 2 | 2 |
| 56 | 1 | 2 | 2 | 1 | 2 | 2 | 2 | 2 | 1 |
| 57 | 2 | 1 | 2 | 2 | 2 | 2 | 1 | 2 | 2 |
| 58 | 2 | 1 | 2 | 2 | 2 | 2 | 1 | 2 | 1 |
| 59 | 2 | 1 | 2 | 2 | 2 | 2 | 1 | 2 | 1 |
| 60 | 2 | 1 | 2 | 1 | 2 | 2 | 1 | 2 | 1 |

|    |   |   |   |   |   |   |   |   |   |
|----|---|---|---|---|---|---|---|---|---|
| 1  |   |   |   |   |   |   |   |   |   |
| 2  | 2 | 1 | 2 | 2 | 2 | 2 | 1 | 2 | 1 |
| 3  | 2 | 1 | 1 | 2 | 2 | 2 | 2 | 2 | 1 |
| 4  | 2 | 1 | 2 | 2 | 2 | 2 | 2 | 2 | 2 |
| 5  | 2 | 1 | 2 | 1 | 1 | 2 | 1 | 2 | 1 |
| 6  | 2 | 1 | 2 | 2 | 2 | 2 | 2 | 2 | 1 |
| 7  | 2 | 1 | 2 | 2 | 2 | 2 | 2 | 2 | 1 |
| 8  | 2 | 1 | 2 | 2 | 2 | 2 | 2 | 2 | 1 |
| 9  | 2 | 1 | 2 | 2 | 2 | 2 | 2 | 2 | 1 |
| 10 | 2 | 1 | 2 | 1 | 2 | 2 | 2 | 2 | 1 |
| 11 | 2 | 1 | 2 | 2 | 2 | 2 | 1 | 2 | 1 |
| 12 | 2 | 1 | 2 | 2 | 2 | 2 | 2 | 2 | 1 |
| 13 | 2 | 1 | 2 | 2 | 2 | 2 | 2 | 2 | 1 |
| 14 | 2 | 1 | 2 | 1 | 1 | 2 | 2 | 2 | 1 |
| 15 | 1 | 1 | 2 | 2 | 1 | 2 | 1 | 2 | 1 |
| 16 | 2 | 1 | 2 | 2 | 2 | 2 | 1 | 2 | 1 |
| 17 | 2 | 1 | 2 | 1 | 2 | 2 | 1 | 2 | 1 |
| 18 | 2 | 2 | 2 | 2 | 2 | 2 | 2 | 2 | 2 |
| 19 | 2 | 2 | 2 | 2 | 2 | 2 | 2 | 2 | 2 |
| 20 | 2 | 1 | 2 | 1 | 2 | 2 | 1 | 2 | 1 |
| 21 | 1 | 1 | 2 | 1 | 2 | 2 | 1 | 2 | 1 |
| 22 | 2 | 1 | 2 | 1 | 2 | 2 | 1 | 2 | 1 |
| 23 | 2 | 2 | 2 | 2 | 2 | 2 | 2 | 2 | 1 |
| 24 | 2 | 1 | 2 | 1 | 2 | 2 | 1 | 2 | 1 |
| 25 | 2 | 1 | 2 | 2 | 2 | 2 | 2 | 2 | 2 |
| 26 | 2 | 1 | 2 | 2 | 2 | 2 | 1 | 2 | 1 |
| 27 | 2 | 2 | 2 | 2 | 2 | 2 | 2 | 2 | 1 |
| 28 | 1 | 1 | 2 | 2 | 2 | 2 | 2 | 2 | 1 |
| 29 | 2 | 1 | 2 | 1 | 2 | 2 | 1 | 2 | 1 |
| 30 | 2 | 1 | 2 | 2 | 2 | 2 | 2 | 2 | 1 |
| 31 | 2 | 1 | 2 | 2 | 2 | 2 | 2 | 2 | 1 |
| 32 | 2 | 1 | 2 | 1 | 2 | 2 | 2 | 2 | 1 |
| 33 | 2 | 1 | 2 | 2 | 2 | 2 | 1 | 2 | 1 |
| 34 | 2 | 1 | 2 | 1 | 2 | 2 | 2 | 2 | 2 |
| 35 | 2 | 1 | 2 | 2 | 2 | 2 | 2 | 2 | 2 |
| 36 | 2 | 1 | 2 | 1 | 2 | 2 | 2 | 2 | 2 |
| 37 | 2 | 1 | 2 | 2 | 1 | 2 | 2 | 2 | 2 |
| 38 | 2 | 1 | 2 | 2 | 1 | 2 | 2 | 2 | 1 |
| 39 | 2 | 1 | 1 | 2 | 2 | 2 | 1 | 2 | 2 |
| 40 | 2 | 1 | 2 | 1 | 2 | 2 | 2 | 2 | 2 |
| 41 | 2 | 1 | 2 | 1 | 2 | 2 | 2 | 2 | 2 |
| 42 | 2 | 1 | 2 | 2 | 2 | 2 | 2 | 2 | 1 |
| 43 | 2 | 1 | 2 | 2 | 2 | 2 | 2 | 2 | 1 |
| 44 | 2 | 1 | 1 | 2 | 2 | 2 | 1 | 2 | 1 |
| 45 | 2 | 1 | 2 | 1 | 1 | 2 | 2 | 2 | 1 |
| 46 | 2 | 1 | 2 | 2 | 1 | 2 | 2 | 2 | 1 |
| 47 | 2 | 1 | 2 | 2 | 1 | 2 | 2 | 2 | 2 |
| 48 | 2 | 1 | 2 | 2 | 1 | 2 | 2 | 2 | 2 |
| 49 | 2 | 1 | 2 | 1 | 1 | 2 | 2 | 2 | 1 |
| 50 | 1 | 1 | 1 | 2 | 1 | 2 | 2 | 2 | 2 |
| 51 | 2 | 1 | 1 | 2 | 2 | 2 | 2 | 2 | 1 |
| 52 | 2 | 1 | 2 | 2 | 2 | 2 | 1 | 2 | 2 |
| 53 | 2 | 1 | 1 | 2 | 1 | 2 | 2 | 2 | 2 |
| 54 | 2 | 1 | 1 | 1 | 2 | 2 | 2 | 2 | 2 |
| 55 | 2 | 1 | 1 | 1 | 2 | 2 | 2 | 2 | 2 |
| 56 | 2 | 1 | 1 | 2 | 2 | 2 | 2 | 2 | 2 |
| 57 | 2 | 1 | 1 | 2 | 2 | 2 | 2 | 2 | 1 |
| 58 | 2 | 2 | 2 | 2 | 1 | 1 | 2 | 2 | 2 |
| 59 | 1 | 1 | 2 | 2 | 2 | 2 | 2 | 2 | 2 |
| 60 | 2 | 1 | 2 | 2 | 1 | 2 | 2 | 2 | 2 |

|    |   |   |   |   |   |   |   |   |   |
|----|---|---|---|---|---|---|---|---|---|
| 1  |   |   |   |   |   |   |   |   |   |
| 2  | 2 | 1 | 2 | 1 | 1 | 1 | 2 | 2 | 2 |
| 3  | 1 | 1 | 1 | 1 | 2 | 2 | 2 | 2 | 1 |
| 4  | 2 | 1 | 1 | 2 | 1 | 2 | 2 | 2 | 2 |
| 5  | 2 | 1 | 1 | 2 | 2 | 2 | 2 | 2 | 2 |
| 6  | 2 | 1 | 1 | 2 | 2 | 2 | 2 | 2 | 2 |
| 7  | 2 | 1 | 1 | 1 | 2 | 2 | 2 | 2 | 2 |
| 8  | 2 | 1 | 1 | 2 | 2 | 2 | 2 | 2 | 2 |
| 9  | 2 | 1 | 1 | 2 | 2 | 2 | 2 | 2 | 2 |
| 10 | 2 | 1 | 2 | 2 | 2 | 1 | 2 | 2 | 2 |
| 11 | 2 | 1 | 2 | 2 | 2 | 2 | 2 | 2 | 2 |
| 12 | 2 | 1 | 1 | 1 | 2 | 2 | 2 | 2 | 2 |
| 13 | 2 | 1 | 1 | 2 | 1 | 2 | 2 | 2 | 2 |
| 14 | 2 | 1 | 2 | 2 | 2 | 1 | 2 | 2 | 2 |
| 15 | 2 | 1 | 2 | 2 | 2 | 1 | 2 | 2 | 1 |
| 16 | 2 | 1 | 1 | 2 | 2 | 1 | 2 | 2 | 2 |
| 17 | 2 | 1 | 2 | 2 | 2 | 2 | 2 | 2 | 2 |
| 18 | 1 | 1 | 1 | 2 | 2 | 2 | 2 | 2 | 2 |
| 19 | 2 | 1 | 1 | 1 | 2 | 2 | 2 | 2 | 1 |
| 20 | 2 | 1 | 1 | 2 | 2 | 2 | 2 | 2 | 2 |
| 21 | 2 | 1 | 1 | 2 | 2 | 2 | 2 | 2 | 2 |
| 22 | 2 | 1 | 2 | 2 | 2 | 2 | 2 | 2 | 1 |
| 23 | 2 | 1 | 1 | 2 | 2 | 2 | 2 | 2 | 1 |
| 24 | 2 | 2 | 2 | 2 | 2 | 2 | 2 | 2 | 2 |
| 25 | 2 | 1 | 2 | 2 | 2 | 2 | 2 | 2 | 2 |
| 26 | 2 | 1 | 2 | 2 | 2 | 2 | 2 | 2 | 2 |
| 27 | 2 | 1 | 2 | 2 | 2 | 2 | 2 | 2 | 1 |
| 28 | 2 | 1 | 2 | 1 | 2 | 2 | 2 | 2 | 2 |
| 29 | 2 | 1 | 1 | 2 | 2 | 2 | 2 | 2 | 2 |
| 30 | 2 | 2 | 2 | 2 | 2 | 2 | 2 | 2 | 2 |
| 31 | 2 | 1 | 2 | 2 | 1 | 2 | 2 | 2 | 1 |
| 32 | 2 | 1 | 2 | 1 | 2 | 2 | 2 | 2 | 2 |
| 33 | 2 | 1 | 1 | 2 | 2 | 2 | 2 | 2 | 1 |
| 34 | 2 | 1 | 2 | 1 | 1 | 2 | 2 | 2 | 2 |
| 35 | 2 | 2 | 2 | 1 | 2 | 2 | 2 | 2 | 2 |
| 36 | 2 | 2 | 2 | 2 | 1 | 2 | 2 | 2 | 2 |
| 37 | 2 | 1 | 2 | 2 | 2 | 2 | 2 | 2 | 1 |
| 38 | 1 | 1 | 2 | 2 | 2 | 2 | 2 | 2 | 1 |
| 39 | 2 | 1 | 2 | 2 | 2 | 2 | 2 | 2 | 2 |
| 40 | 2 | 1 | 2 | 2 | 2 | 2 | 2 | 2 | 2 |
| 41 | 2 | 1 | 2 | 2 | 2 | 2 | 1 | 2 | 2 |
| 42 | 2 | 1 | 2 | 2 | 2 | 2 | 2 | 2 | 2 |
| 43 | 2 | 1 | 2 | 1 | 2 | 2 | 2 | 2 | 1 |
| 44 | 2 | 2 | 2 | 2 | 2 | 2 | 2 | 2 | 2 |
| 45 | 2 | 1 | 1 | 2 | 2 | 2 | 2 | 2 | 2 |
| 46 | 2 | 1 | 1 | 1 | 2 | 2 | 2 | 2 | 2 |
| 47 | 2 | 1 | 2 | 2 | 2 | 2 | 2 | 2 | 2 |
| 48 | 2 | 1 | 2 | 2 | 2 | 2 | 2 | 2 | 2 |
| 49 | 2 | 1 | 2 | 2 | 2 | 2 | 2 | 2 | 2 |
| 50 | 2 | 1 | 1 | 2 | 2 | 2 | 2 | 2 | 2 |
| 51 | 2 | 1 | 1 | 1 | 2 | 2 | 2 | 2 | 2 |
| 52 | 2 | 1 | 2 | 2 | 2 | 2 | 2 | 2 | 2 |
| 53 | 2 | 1 | 2 | 2 | 2 | 2 | 2 | 2 | 2 |
| 54 | 2 | 1 | 2 | 2 | 2 | 2 | 2 | 2 | 2 |
| 55 | 2 | 2 | 2 | 2 | 2 | 2 | 2 | 2 | 1 |
| 56 | 2 | 1 | 1 | 2 | 2 | 2 | 2 | 2 | 1 |
| 57 | 1 | 1 | 2 | 2 | 2 | 2 | 2 | 2 | 2 |
| 58 | 2 | 1 | 1 | 2 | 2 | 2 | 2 | 2 | 1 |
| 59 | 2 | 1 | 2 | 2 | 2 | 2 | 2 | 2 | 2 |
| 60 | 2 | 1 | 2 | 2 | 2 | 2 | 2 | 2 | 2 |



|    |   |   |   |   |   |   |   |   |   |
|----|---|---|---|---|---|---|---|---|---|
| 1  |   |   |   |   |   |   |   |   |   |
| 2  | 2 | 1 | 2 | 2 | 2 | 2 | 2 | 2 | 2 |
| 3  | 2 | 1 | 2 | 2 | 2 | 2 | 2 | 2 | 2 |
| 4  | 2 | 1 | 2 | 1 | 2 | 2 | 2 | 2 | 2 |
| 5  | 1 | 1 | 2 | 2 | 2 | 2 | 2 | 2 | 2 |
| 6  | 1 | 1 | 1 | 2 | 2 | 2 | 2 | 2 | 2 |
| 7  | 2 | 1 | 2 | 2 | 2 | 2 | 2 | 2 | 2 |
| 8  | 2 | 1 | 2 | 2 | 2 | 2 | 2 | 2 | 2 |
| 9  | 2 | 1 | 2 | 2 | 2 | 2 | 2 | 2 | 2 |
| 10 | 2 | 1 | 2 | 2 | 2 | 2 | 2 | 2 | 2 |
| 11 | 2 | 1 | 2 | 2 | 2 | 2 | 2 | 2 | 2 |
| 12 | 2 | 1 | 1 | 2 | 2 | 2 | 2 | 2 | 2 |
| 13 | 2 | 1 | 2 | 2 | 2 | 2 | 2 | 2 | 2 |
| 14 | 2 | 1 | 2 | 2 | 2 | 2 | 2 | 2 | 2 |
| 15 | 2 | 1 | 2 | 2 | 2 | 2 | 2 | 2 | 2 |
| 16 | 2 | 2 | 2 | 1 | 2 | 2 | 2 | 2 | 1 |
| 17 | 2 | 1 | 2 | 2 | 2 | 2 | 2 | 2 | 2 |
| 18 | 2 | 1 | 2 | 2 | 2 | 2 | 2 | 2 | 2 |
| 19 | 2 | 1 | 2 | 2 | 2 | 2 | 2 | 2 | 2 |
| 20 | 2 | 1 | 2 | 2 | 2 | 2 | 2 | 2 | 1 |
| 21 | 2 | 1 | 1 | 2 | 2 | 2 | 2 | 2 | 1 |
| 22 | 2 | 1 | 2 | 2 | 2 | 2 | 2 | 2 | 1 |
| 23 | 2 | 1 | 1 | 2 | 2 | 2 | 2 | 2 | 2 |
| 24 | 1 | 1 | 2 | 2 | 2 | 2 | 2 | 2 | 1 |
| 25 | 2 | 1 | 2 | 2 | 2 | 2 | 2 | 2 | 1 |
| 26 | 2 | 1 | 2 | 2 | 2 | 2 | 2 | 2 | 1 |
| 27 | 1 | 1 | 2 | 2 | 2 | 2 | 2 | 2 | 1 |
| 28 | 2 | 1 | 2 | 2 | 2 | 2 | 2 | 2 | 1 |
| 29 | 2 | 1 | 1 | 2 | 1 | 2 | 2 | 2 | 2 |
| 30 | 2 | 1 | 2 | 2 | 2 | 2 | 2 | 2 | 1 |
| 31 | 2 | 1 | 2 | 2 | 2 | 2 | 2 | 2 | 1 |
| 32 | 2 | 1 | 2 | 2 | 2 | 2 | 2 | 2 | 1 |
| 33 | 2 | 1 | 2 | 2 | 2 | 2 | 2 | 2 | 1 |
| 34 | 2 | 1 | 2 | 2 | 2 | 2 | 2 | 2 | 1 |
| 35 | 2 | 1 | 2 | 1 | 2 | 2 | 2 | 2 | 1 |
| 36 | 2 | 1 | 2 | 2 | 2 | 2 | 2 | 2 | 2 |
| 37 | 2 | 1 | 1 | 2 | 2 | 2 | 2 | 2 | 1 |
| 38 | 2 | 1 | 2 | 2 | 2 | 2 | 2 | 2 | 1 |
| 39 | 2 | 1 | 2 | 2 | 2 | 2 | 2 | 2 | 1 |
| 40 | 2 | 1 | 1 | 2 | 2 | 2 | 2 | 2 | 1 |
| 41 | 2 | 1 | 2 | 2 | 2 | 2 | 2 | 2 | 1 |
| 42 | 2 | 1 | 2 | 2 | 2 | 2 | 2 | 2 | 2 |
| 43 | 2 | 1 | 1 | 2 | 2 | 2 | 2 | 2 | 1 |
| 44 | 2 | 1 | 1 | 1 | 2 | 2 | 2 | 2 | 1 |
| 45 | 1 | 1 | 2 | 2 | 2 | 2 | 1 | 2 | 1 |
| 46 | 2 | 1 | 2 | 2 | 2 | 2 | 2 | 2 | 2 |
| 47 | 2 | 1 | 2 | 2 | 2 | 2 | 1 | 2 | 1 |
| 48 | 2 | 1 | 2 | 2 | 2 | 2 | 2 | 2 | 2 |
| 49 | 2 | 1 | 1 | 2 | 2 | 2 | 2 | 2 | 2 |
| 50 | 2 | 1 | 1 | 2 | 2 | 2 | 2 | 2 | 2 |
| 51 | 2 | 1 | 2 | 2 | 2 | 2 | 2 | 2 | 1 |
| 52 | 2 | 1 | 2 | 2 | 2 | 2 | 2 | 2 | 1 |
| 53 | 2 | 1 | 1 | 2 | 2 | 2 | 2 | 2 | 1 |
| 54 | 2 | 1 | 2 | 2 | 2 | 2 | 2 | 2 | 1 |
| 55 | 2 | 1 | 1 | 2 | 2 | 2 | 2 | 2 | 1 |
| 56 | 2 | 1 | 1 | 2 | 2 | 2 | 2 | 2 | 1 |
| 57 | 2 | 1 | 1 | 2 | 2 | 2 | 1 | 2 | 1 |
| 58 | 2 | 1 | 2 | 1 | 2 | 2 | 2 | 2 | 1 |
| 59 | 2 | 1 | 2 | 2 | 2 | 2 | 2 | 2 | 1 |
| 60 | 2 | 1 | 2 | 2 | 2 | 2 | 2 | 2 | 1 |

|    |   |   |   |   |   |   |   |   |   |
|----|---|---|---|---|---|---|---|---|---|
| 1  |   |   |   |   |   |   |   |   |   |
| 2  | 2 | 1 | 2 | 2 | 2 | 2 | 2 | 2 | 2 |
| 3  | 2 | 1 | 2 | 2 | 2 | 2 | 2 | 2 | 2 |
| 4  | 2 | 1 | 1 | 2 | 2 | 2 | 2 | 2 | 2 |
| 5  | 2 | 1 | 1 | 2 | 2 | 2 | 1 | 2 | 1 |
| 6  | 2 | 1 | 2 | 2 | 2 | 2 | 2 | 2 | 1 |
| 7  | 2 | 1 | 1 | 2 | 2 | 2 | 2 | 2 | 2 |
| 8  | 2 | 1 | 1 | 2 | 2 | 2 | 2 | 2 | 2 |
| 9  | 2 | 1 | 1 | 2 | 2 | 2 | 2 | 2 | 2 |
| 10 | 2 | 1 | 2 | 2 | 2 | 2 | 2 | 2 | 2 |
| 11 | 2 | 1 | 2 | 1 | 1 | 2 | 2 | 2 | 2 |
| 12 | 1 | 1 | 2 | 2 | 1 | 2 | 2 | 2 | 1 |
| 13 | 2 | 1 | 1 | 2 | 1 | 2 | 2 | 2 | 1 |
| 14 | 2 | 1 | 1 | 2 | 2 | 2 | 2 | 2 | 1 |
| 15 | 2 | 1 | 1 | 2 | 2 | 2 | 2 | 2 | 1 |
| 16 | 2 | 1 | 1 | 2 | 2 | 2 | 1 | 2 | 2 |
| 17 | 2 | 1 | 2 | 2 | 2 | 2 | 2 | 2 | 1 |
| 18 | 2 | 1 | 2 | 2 | 2 | 2 | 2 | 2 | 1 |
| 19 | 2 | 1 | 2 | 2 | 2 | 2 | 2 | 2 | 1 |
| 20 | 2 | 1 | 2 | 2 | 2 | 2 | 2 | 2 | 2 |
| 21 | 1 | 1 | 1 | 1 | 2 | 2 | 2 | 2 | 1 |
| 22 | 2 | 1 | 1 | 2 | 2 | 2 | 2 | 2 | 1 |
| 23 | 2 | 1 | 2 | 1 | 1 | 2 | 2 | 2 | 1 |
| 24 | 2 | 1 | 2 | 2 | 1 | 2 | 2 | 2 | 1 |
| 25 | 2 | 1 | 2 | 2 | 2 | 2 | 2 | 2 | 1 |
| 26 | 1 | 1 | 1 | 2 | 2 | 2 | 2 | 2 | 1 |
| 27 | 2 | 1 | 2 | 2 | 2 | 2 | 2 | 2 | 1 |
| 28 | 2 | 1 | 2 | 2 | 2 | 2 | 1 | 2 | 1 |
| 29 | 1 | 1 | 2 | 2 | 1 | 2 | 2 | 2 | 1 |
| 30 | 2 | 1 | 2 | 2 | 2 | 2 | 2 | 2 | 1 |
| 31 | 2 | 1 | 2 | 2 | 2 | 2 | 2 | 2 | 1 |
| 32 | 1 | 1 | 2 | 2 | 2 | 2 | 2 | 2 | 1 |
| 33 | 2 | 1 | 1 | 2 | 2 | 2 | 2 | 2 | 2 |
| 34 | 1 | 1 | 1 | 2 | 2 | 2 | 1 | 2 | 2 |
| 35 | 2 | 1 | 2 | 2 | 2 | 2 | 1 | 2 | 2 |
| 36 | 2 | 1 | 2 | 2 | 2 | 2 | 2 | 2 | 1 |
| 37 | 2 | 1 | 2 | 2 | 2 | 2 | 2 | 2 | 1 |
| 38 | 2 | 1 | 1 | 2 | 2 | 2 | 2 | 2 | 2 |
| 39 | 2 | 1 | 2 | 1 | 2 | 2 | 2 | 2 | 2 |
| 40 | 2 | 1 | 1 | 2 | 2 | 2 | 2 | 2 | 2 |
| 41 | 2 | 1 | 1 | 2 | 2 | 2 | 2 | 2 | 2 |
| 42 | 2 | 2 | 2 | 1 | 2 | 2 | 2 | 2 | 2 |
| 43 | 2 | 1 | 2 | 2 | 2 | 2 | 2 | 2 | 1 |
| 44 | 2 | 1 | 1 | 2 | 1 | 2 | 1 | 2 | 1 |
| 45 | 2 | 2 | 2 | 2 | 2 | 2 | 2 | 2 | 1 |
| 46 | 2 | 1 | 2 | 2 | 2 | 2 | 2 | 2 | 1 |
| 47 | 2 | 2 | 2 | 2 | 2 | 2 | 2 | 2 | 1 |
| 48 | 2 | 1 | 2 | 2 | 2 | 2 | 2 | 2 | 1 |
| 49 | 2 | 1 | 1 | 2 | 2 | 2 | 2 | 2 | 2 |
| 50 | 2 | 1 | 1 | 2 | 2 | 2 | 2 | 2 | 2 |
| 51 | 2 | 1 | 1 | 2 | 2 | 2 | 2 | 2 | 1 |
| 52 | 2 | 1 | 1 | 2 | 2 | 2 | 2 | 2 | 2 |
| 53 | 1 | 1 | 1 | 2 | 1 | 2 | 2 | 2 | 1 |
| 54 | 2 | 2 | 2 | 1 | 2 | 1 | 2 | 2 | 1 |
| 55 | 2 | 1 | 1 | 2 | 1 | 2 | 2 | 2 | 1 |
| 56 | 2 | 1 | 2 | 1 | 2 | 2 | 2 | 2 | 1 |
| 57 | 2 | 2 | 2 | 2 | 2 | 2 | 2 | 2 | 1 |
| 58 | 2 | 1 | 1 | 2 | 2 | 2 | 2 | 2 | 1 |
| 59 | 2 | 1 | 1 | 2 | 2 | 2 | 2 | 2 | 1 |
| 60 | 2 | 1 | 2 | 2 | 2 | 1 | 2 | 2 | 1 |

|    |   |   |   |   |   |   |   |   |   |
|----|---|---|---|---|---|---|---|---|---|
| 1  |   |   |   |   |   |   |   |   |   |
| 2  | 2 | 1 | 1 | 2 | 2 | 2 | 2 | 2 | 1 |
| 3  | 2 | 1 | 1 | 1 | 2 | 2 | 2 | 2 | 1 |
| 4  | 2 | 2 | 2 | 1 | 1 | 2 | 1 | 2 | 2 |
| 5  | 2 | 1 | 1 | 2 | 2 | 2 | 2 | 2 | 1 |
| 6  |   |   |   |   |   |   |   |   |   |
| 7  | 1 | 1 | 1 | 2 | 2 | 2 | 2 | 2 | 1 |
| 8  | 2 | 2 | 2 | 1 | 2 | 2 | 2 | 2 | 1 |
| 9  | 2 | 1 | 1 | 1 | 2 | 2 | 2 | 2 | 1 |
| 10 | 2 | 2 | 1 | 2 | 1 | 2 | 2 | 2 | 2 |
| 11 | 2 | 1 | 1 | 1 | 2 | 2 | 2 | 2 | 1 |
| 12 |   |   |   |   |   |   |   |   |   |
| 13 | 2 | 2 | 2 | 1 | 2 | 2 | 2 | 2 | 1 |
| 14 | 2 | 1 | 1 | 1 | 2 | 2 | 2 | 2 | 2 |
| 15 | 2 | 1 | 1 | 2 | 2 | 2 | 1 | 2 | 2 |
| 16 | 2 | 1 | 2 | 2 | 2 | 2 | 1 | 2 | 2 |
| 17 | 2 | 1 | 2 | 2 | 2 | 2 | 2 | 2 | 1 |
| 18 |   |   |   |   |   |   |   |   |   |
| 19 | 2 | 2 | 2 | 2 | 2 | 2 | 2 | 2 | 1 |
| 20 | 2 | 2 | 2 | 1 | 2 | 2 | 2 | 2 | 2 |
| 21 | 2 | 1 | 1 | 1 | 2 | 2 | 2 | 2 | 1 |
| 22 | 2 | 1 | 1 | 1 | 2 | 2 | 2 | 2 | 1 |
| 23 |   |   |   |   |   |   |   |   |   |
| 24 | 2 | 1 | 1 | 2 | 2 | 2 | 2 | 2 | 1 |
| 25 | 2 | 1 | 2 | 2 | 2 | 2 | 2 | 2 | 1 |
| 26 | 2 | 1 | 1 | 1 | 2 | 2 | 2 | 2 | 1 |
| 27 | 2 | 1 | 1 | 1 | 2 | 2 | 2 | 2 | 1 |
| 28 | 2 | 1 | 1 | 2 | 2 | 2 | 2 | 2 | 1 |
| 29 |   |   |   |   |   |   |   |   |   |
| 30 | 2 | 1 | 2 | 2 | 2 | 2 | 1 | 2 | 1 |
| 31 | 2 | 1 | 1 | 2 | 2 | 2 | 2 | 2 | 1 |
| 32 | 2 | 1 | 1 | 2 | 2 | 2 | 2 | 2 | 1 |
| 33 | 2 | 1 | 2 | 1 | 2 | 2 | 2 | 2 | 1 |
| 34 | 2 | 1 | 2 | 1 | 2 | 2 | 2 | 2 | 2 |
| 35 | 2 | 1 | 2 | 1 | 2 | 2 | 2 | 2 | 2 |
| 36 |   |   |   |   |   |   |   |   |   |
| 37 | 2 | 2 | 2 | 2 | 2 | 2 | 2 | 2 | 2 |
| 38 | 2 | 1 | 1 | 2 | 2 | 2 | 2 | 2 | 1 |
| 39 | 2 | 1 | 1 | 1 | 2 | 2 | 1 | 2 | 1 |
| 40 | 2 | 1 | 1 | 1 | 2 | 2 | 1 | 2 | 2 |
| 41 |   |   |   |   |   |   |   |   |   |
| 42 | 2 | 2 | 2 | 2 | 2 | 2 | 2 | 2 | 2 |
| 43 | 2 | 2 | 1 | 2 | 2 | 2 | 1 | 2 | 2 |
| 44 | 2 | 1 | 1 | 1 | 2 | 2 | 2 | 2 | 2 |
| 45 | 2 | 2 | 2 | 2 | 2 | 2 | 2 | 2 | 1 |
| 46 | 2 | 2 | 2 | 2 | 2 | 2 | 2 | 2 | 2 |
| 47 |   |   |   |   |   |   |   |   |   |
| 48 | 1 | 1 | 2 | 2 | 2 | 2 | 2 | 2 | 1 |
| 49 | 1 | 1 | 1 | 2 | 2 | 2 | 2 | 2 | 1 |
| 50 | 2 | 1 | 1 | 2 | 2 | 2 | 2 | 2 | 2 |
| 51 | 1 | 1 | 2 | 1 | 2 | 2 | 1 | 2 | 1 |
| 52 | 2 | 1 | 2 | 2 | 2 | 2 | 2 | 2 | 2 |
| 53 |   |   |   |   |   |   |   |   |   |
| 54 | 1 | 1 | 2 | 2 | 2 | 2 | 2 | 2 | 1 |
| 55 | 1 | 1 | 2 | 1 | 1 | 2 | 1 | 2 | 1 |
| 56 | 2 | 1 | 2 | 2 | 2 | 2 | 2 | 2 | 1 |
| 57 | 1 | 1 | 2 | 2 | 2 | 2 | 2 | 2 | 1 |
| 58 | 2 | 1 | 1 | 2 | 2 | 2 | 2 | 2 | 1 |
| 59 | 2 | 1 | 1 | 2 | 2 | 2 | 2 | 2 | 1 |
| 60 | 2 | 1 | 2 | 2 | 2 | 2 | 2 | 2 | 1 |

|    |   |   |   |   |   |   |   |   |   |
|----|---|---|---|---|---|---|---|---|---|
| 1  |   |   |   |   |   |   |   |   |   |
| 2  | 2 | 1 | 1 | 2 | 2 | 2 | 2 | 2 | 2 |
| 3  | 2 | 1 | 2 | 1 | 2 | 2 | 2 | 2 | 1 |
| 4  | 2 | 1 | 1 | 2 | 2 | 2 | 2 | 2 | 1 |
| 5  | 2 | 1 | 1 | 2 | 2 | 2 | 2 | 2 | 1 |
| 6  | 2 | 1 | 1 | 1 | 1 | 1 | 2 | 2 | 2 |
| 7  | 2 | 1 | 1 | 2 | 2 | 2 | 2 | 2 | 1 |
| 8  | 2 | 1 | 1 | 2 | 2 | 2 | 2 | 2 | 1 |
| 9  | 2 | 1 | 1 | 2 | 2 | 2 | 2 | 2 | 1 |
| 10 | 2 | 1 | 2 | 2 | 2 | 1 | 2 | 2 | 1 |
| 11 | 2 | 1 | 1 | 2 | 2 | 2 | 2 | 2 | 1 |
| 12 | 2 | 1 | 1 | 2 | 2 | 2 | 2 | 2 | 1 |
| 13 | 2 | 1 | 1 | 2 | 2 | 2 | 2 | 2 | 1 |
| 14 | 2 | 1 | 1 | 2 | 2 | 2 | 1 | 2 | 2 |
| 15 | 2 | 2 | 2 | 1 | 1 | 2 | 2 | 2 | 1 |
| 16 | 1 | 1 | 1 | 2 | 2 | 2 | 2 | 2 | 1 |
| 17 | 2 | 1 | 2 | 2 | 2 | 2 | 2 | 2 | 2 |
| 18 | 1 | 1 | 2 | 2 | 2 | 2 | 2 | 2 | 1 |
| 19 | 1 | 2 | 1 | 2 | 2 | 2 | 2 | 2 | 1 |
| 20 | 2 | 1 | 2 | 2 | 2 | 2 | 1 | 2 | 1 |
| 21 | 2 | 1 | 2 | 2 | 2 | 2 | 2 | 2 | 1 |
| 22 | 2 | 1 | 2 | 2 | 2 | 2 | 2 | 2 | 1 |
| 23 | 2 | 1 | 2 | 2 | 2 | 2 | 2 | 2 | 2 |
| 24 | 2 | 1 | 2 | 2 | 2 | 2 | 2 | 2 | 2 |
| 25 | 2 | 1 | 2 | 1 | 2 | 2 | 2 | 2 | 1 |
| 26 | 2 | 1 | 2 | 1 | 2 | 2 | 1 | 2 | 1 |
| 27 | 2 | 1 | 2 | 1 | 2 | 2 | 2 | 2 | 1 |
| 28 | 2 | 1 | 2 | 1 | 2 | 2 | 2 | 2 | 1 |
| 29 | 2 | 1 | 2 | 1 | 2 | 2 | 2 | 2 | 1 |
| 30 | 2 | 1 | 1 | 2 | 2 | 2 | 2 | 2 | 1 |
| 31 | 2 | 1 | 2 | 2 | 2 | 2 | 2 | 2 | 1 |
| 32 | 2 | 1 | 2 | 2 | 2 | 2 | 2 | 2 | 1 |
| 33 | 2 | 1 | 1 | 2 | 2 | 2 | 2 | 2 | 1 |
| 34 | 2 | 2 | 2 | 2 | 2 | 2 | 2 | 2 | 1 |
| 35 | 1 | 2 | 2 | 2 | 2 | 2 | 1 | 2 | 1 |
| 36 | 2 | 1 | 2 | 2 | 2 | 2 | 2 | 2 | 1 |
| 37 | 2 | 2 | 2 | 2 | 2 | 2 | 2 | 2 | 1 |
| 38 | 2 | 2 | 2 | 2 | 2 | 2 | 2 | 2 | 1 |
| 39 | 2 | 2 | 2 | 1 | 2 | 2 | 1 | 1 | 2 |
| 40 | 2 | 2 | 2 | 2 | 2 | 2 | 2 | 2 | 1 |
| 41 | 2 | 1 | 1 | 2 | 2 | 2 | 2 | 2 | 1 |
| 42 | 2 | 1 | 1 | 2 | 2 | 2 | 2 | 2 | 1 |
| 43 | 2 | 1 | 1 | 1 | 2 | 2 | 1 | 2 | 1 |
| 44 | 1 | 1 | 1 | 2 | 2 | 2 | 2 | 2 | 2 |
| 45 | 1 | 1 | 1 | 2 | 2 | 2 | 2 | 2 | 2 |
| 46 | 2 | 1 | 2 | 2 | 2 | 2 | 2 | 2 | 1 |
| 47 | 2 | 1 | 1 | 2 | 2 | 2 | 2 | 2 | 2 |
| 48 | 1 | 1 | 1 | 2 | 2 | 2 | 2 | 2 | 2 |
| 49 | 2 | 1 | 1 | 2 | 2 | 2 | 2 | 2 | 1 |
| 50 | 2 | 1 | 1 | 2 | 2 | 2 | 2 | 2 | 1 |
| 51 | 1 | 1 | 1 | 2 | 2 | 2 | 2 | 2 | 1 |
| 52 | 2 | 1 | 1 | 1 | 2 | 2 | 2 | 2 | 1 |
| 53 | 2 | 1 | 1 | 2 | 2 | 2 | 2 | 2 | 1 |
| 54 | 2 | 1 | 1 | 2 | 2 | 2 | 2 | 2 | 2 |
| 55 | 1 | 2 | 2 | 2 | 2 | 2 | 2 | 2 | 2 |
| 56 | 1 | 1 | 2 | 2 | 2 | 2 | 2 | 2 | 1 |
| 57 | 1 | 2 | 2 | 2 | 2 | 2 | 2 | 2 | 2 |
| 58 | 2 | 2 | 2 | 1 | 2 | 2 | 2 | 2 | 1 |
| 59 | 2 | 2 | 1 | 1 | 2 | 2 | 1 | 2 | 1 |
| 60 | 2 | 2 | 1 | 1 | 2 | 2 | 2 | 2 | 1 |

|    |   |   |   |   |   |   |   |   |   |
|----|---|---|---|---|---|---|---|---|---|
| 1  |   |   |   |   |   |   |   |   |   |
| 2  | 2 | 1 | 2 | 1 | 2 | 2 | 2 | 2 | 1 |
| 3  | 2 | 1 | 1 | 2 | 2 | 2 | 2 | 2 | 1 |
| 4  | 2 | 1 | 1 | 1 | 2 | 2 | 1 | 2 | 1 |
| 5  | 2 | 2 | 2 | 2 | 1 | 2 | 2 | 2 | 1 |
| 6  | 2 | 1 | 1 | 1 | 2 | 2 | 2 | 2 | 1 |
| 7  | 2 | 1 | 1 | 2 | 2 | 1 | 2 | 2 | 2 |
| 8  | 2 | 1 | 2 | 2 | 2 | 2 | 2 | 2 | 2 |
| 9  | 2 | 1 | 1 | 1 | 2 | 2 | 2 | 2 | 1 |
| 10 | 2 | 1 | 2 | 2 | 2 | 2 | 2 | 2 | 1 |
| 11 | 2 | 1 | 2 | 2 | 2 | 2 | 2 | 2 | 1 |
| 12 | 1 | 2 | 2 | 2 | 1 | 2 | 1 | 2 | 1 |
| 13 | 2 | 1 | 1 | 1 | 2 | 2 | 2 | 2 | 1 |
| 14 | 2 | 1 | 1 | 2 | 2 | 2 | 2 | 2 | 2 |
| 15 | 2 | 1 | 2 | 2 | 2 | 2 | 2 | 2 | 2 |
| 16 | 2 | 1 | 2 | 2 | 2 | 2 | 2 | 2 | 2 |
| 17 | 1 | 1 | 2 | 1 | 2 | 2 | 1 | 2 | 1 |
| 18 | 2 | 1 | 1 | 2 | 2 | 2 | 1 | 2 | 1 |
| 19 | 2 | 1 | 2 | 2 | 2 | 2 | 2 | 2 | 1 |
| 20 | 2 | 1 | 1 | 2 | 2 | 2 | 2 | 2 | 1 |
| 21 | 2 | 1 | 1 | 2 | 2 | 2 | 2 | 2 | 1 |
| 22 | 1 | 1 | 1 | 2 | 2 | 2 | 2 | 2 | 2 |
| 23 | 1 | 1 | 2 | 1 | 2 | 2 | 2 | 2 | 1 |
| 24 | 2 | 1 | 2 | 2 | 2 | 2 | 2 | 2 | 1 |
| 25 | 2 | 1 | 2 | 2 | 2 | 2 | 2 | 2 | 1 |
| 26 | 2 | 1 | 2 | 2 | 2 | 2 | 2 | 2 | 1 |
| 27 | 1 | 1 | 2 | 1 | 2 | 2 | 2 | 2 | 2 |
| 28 | 2 | 1 | 2 | 2 | 1 | 2 | 1 | 2 | 1 |
| 29 | 2 | 1 | 1 | 2 | 2 | 2 | 1 | 2 | 1 |
| 30 | 1 | 2 | 2 | 1 | 2 | 2 | 1 | 2 | 1 |
| 31 | 1 | 1 | 1 | 2 | 2 | 2 | 1 | 2 | 2 |
| 32 | 2 | 1 | 1 | 2 | 2 | 2 | 2 | 2 | 1 |
| 33 | 2 | 1 | 2 | 2 | 2 | 2 | 2 | 2 | 1 |
| 34 | 2 | 1 | 2 | 2 | 2 | 2 | 2 | 2 | 1 |
| 35 | 2 | 1 | 2 | 2 | 2 | 2 | 2 | 2 | 1 |
| 36 | 2 | 1 | 1 | 2 | 2 | 2 | 2 | 2 | 1 |
| 37 | 2 | 1 | 2 | 2 | 2 | 2 | 2 | 2 | 2 |
| 38 | 1 | 1 | 1 | 2 | 2 | 2 | 2 | 2 | 2 |
| 39 | 2 | 2 | 1 | 1 | 2 | 2 | 1 | 2 | 1 |
| 40 | 1 | 1 | 1 | 2 | 2 | 2 | 2 | 2 | 1 |
| 41 | 2 | 1 | 2 | 2 | 2 | 2 | 2 | 2 | 1 |
| 42 | 2 | 1 | 2 | 2 | 2 | 2 | 2 | 2 | 1 |
| 43 | 2 | 1 | 2 | 2 | 2 | 2 | 2 | 2 | 1 |
| 44 | 1 | 1 | 1 | 2 | 2 | 2 | 2 | 2 | 2 |
| 45 | 2 | 1 | 1 | 2 | 2 | 2 | 2 | 2 | 1 |
| 46 | 2 | 1 | 1 | 2 | 2 | 2 | 1 | 2 | 1 |
| 47 | 2 | 1 | 1 | 2 | 2 | 2 | 2 | 2 | 1 |
| 48 | 2 | 1 | 2 | 2 | 2 | 2 | 2 | 2 | 2 |
| 49 | 2 | 1 | 2 | 2 | 2 | 2 | 2 | 2 | 2 |
| 50 | 1 | 1 | 2 | 1 | 2 | 2 | 2 | 2 | 1 |
| 51 | 2 | 1 | 2 | 2 | 2 | 2 | 1 | 2 | 1 |
| 52 | 1 | 1 | 1 | 1 | 2 | 2 | 2 | 2 | 2 |
| 53 | 2 | 1 | 1 | 2 | 2 | 2 | 1 | 2 | 1 |
| 54 | 2 | 1 | 2 | 2 | 2 | 2 | 2 | 2 | 1 |
| 55 | 1 | 1 | 1 | 2 | 2 | 2 | 2 | 2 | 2 |
| 56 | 2 | 1 | 2 | 2 | 2 | 2 | 2 | 2 | 1 |
| 57 | 1 | 1 | 1 | 2 | 2 | 2 | 2 | 2 | 2 |
| 58 | 2 | 1 | 2 | 2 | 2 | 2 | 2 | 2 | 1 |
| 59 | 1 | 2 | 2 | 1 | 2 | 2 | 2 | 2 | 1 |
| 60 | 2 | 1 | 2 | 2 | 2 | 2 | 2 | 2 | 1 |

|    |   |   |   |   |   |   |   |   |   |
|----|---|---|---|---|---|---|---|---|---|
| 1  |   |   |   |   |   |   |   |   |   |
| 2  | 1 | 1 | 1 | 2 | 2 | 2 | 1 | 2 | 2 |
| 3  | 2 | 1 | 2 | 2 | 2 | 2 | 2 | 2 | 1 |
| 4  | 2 | 1 | 2 | 2 | 2 | 2 | 2 | 2 | 1 |
| 5  | 1 | 1 | 1 | 2 | 2 | 2 | 2 | 2 | 2 |
| 6  | 1 | 1 | 2 | 2 | 2 | 2 | 2 | 2 | 1 |
| 7  | 2 | 1 | 1 | 1 | 2 | 2 | 2 | 2 | 1 |
| 8  | 2 | 1 | 2 | 1 | 2 | 2 | 2 | 2 | 2 |
| 9  | 1 | 1 | 1 | 1 | 2 | 2 | 1 | 2 | 2 |
| 10 | 2 | 1 | 2 | 2 | 2 | 2 | 2 | 2 | 2 |
| 11 | 2 | 1 | 1 | 1 | 2 | 2 | 2 | 2 | 1 |
| 12 | 2 | 1 | 2 | 1 | 2 | 2 | 2 | 2 | 2 |
| 13 | 2 | 1 | 2 | 2 | 2 | 2 | 1 | 2 | 1 |
| 14 | 1 | 1 | 2 | 2 | 2 | 2 | 1 | 2 | 1 |
| 15 | 1 | 1 | 2 | 2 | 2 | 2 | 2 | 2 | 1 |
| 16 | 2 | 1 | 1 | 2 | 2 | 2 | 2 | 2 | 1 |
| 17 | 2 | 1 | 1 | 2 | 2 | 2 | 2 | 2 | 1 |
| 18 | 2 | 2 | 2 | 2 | 2 | 2 | 2 | 2 | 1 |
| 19 | 1 | 1 | 2 | 2 | 1 | 2 | 2 | 2 | 2 |
| 20 | 2 | 2 | 2 | 2 | 2 | 2 | 2 | 2 | 1 |
| 21 | 2 | 2 | 2 | 1 | 2 | 2 | 2 | 2 | 1 |
| 22 | 2 | 1 | 1 | 2 | 1 | 2 | 2 | 2 | 2 |
| 23 | 2 | 1 | 2 | 1 | 1 | 2 | 2 | 2 | 1 |
| 24 | 2 | 1 | 1 | 1 | 2 | 2 | 2 | 2 | 2 |
| 25 | 2 | 1 | 2 | 1 | 2 | 2 | 2 | 2 | 1 |
| 26 | 2 | 1 | 1 | 1 | 2 | 2 | 2 | 2 | 2 |
| 27 | 2 | 1 | 2 | 1 | 2 | 2 | 2 | 2 | 1 |
| 28 | 2 | 1 | 2 | 1 | 2 | 2 | 1 | 2 | 1 |
| 29 | 2 | 1 | 2 | 1 | 2 | 2 | 2 | 2 | 2 |
| 30 | 2 | 1 | 2 | 1 | 2 | 2 | 1 | 2 | 1 |
| 31 | 1 | 1 | 1 | 2 | 2 | 2 | 2 | 2 | 1 |
| 32 | 2 | 1 | 1 | 1 | 2 | 2 | 2 | 2 | 1 |
| 33 | 1 | 1 | 2 | 2 | 2 | 2 | 2 | 2 | 2 |
| 34 | 2 | 1 | 1 | 2 | 2 | 2 | 2 | 2 | 2 |
| 35 | 2 | 1 | 1 | 2 | 2 | 2 | 2 | 2 | 2 |
| 36 | 2 | 1 | 1 | 1 | 2 | 2 | 2 | 2 | 1 |
| 37 | 2 | 1 | 1 | 1 | 2 | 2 | 2 | 2 | 2 |
| 38 | 1 | 1 | 2 | 2 | 2 | 2 | 2 | 2 | 1 |
| 39 | 2 | 1 | 2 | 2 | 2 | 2 | 2 | 2 | 1 |
| 40 | 1 | 1 | 2 | 1 | 2 | 2 | 2 | 2 | 2 |
| 41 | 2 | 1 | 1 | 2 | 2 | 2 | 2 | 2 | 1 |
| 42 | 2 | 1 | 1 | 2 | 2 | 2 | 2 | 2 | 2 |
| 43 | 2 | 1 | 1 | 2 | 2 | 2 | 2 | 2 | 1 |
| 44 | 2 | 1 | 1 | 2 | 2 | 2 | 2 | 2 | 2 |
| 45 | 2 | 1 | 1 | 2 | 2 | 2 | 2 | 2 | 1 |
| 46 | 2 | 1 | 2 | 1 | 2 | 2 | 2 | 2 | 1 |
| 47 | 2 | 1 | 2 | 1 | 2 | 2 | 2 | 2 | 1 |
| 48 | 1 | 2 | 2 | 1 | 2 | 2 | 2 | 2 | 1 |
| 49 | 1 | 1 | 2 | 1 | 2 | 2 | 2 | 2 | 1 |
| 50 | 2 | 1 | 1 | 2 | 2 | 2 | 2 | 2 | 1 |
| 51 | 2 | 1 | 2 | 2 | 2 | 2 | 2 | 2 | 1 |
| 52 | 2 | 1 | 1 | 2 | 2 | 2 | 2 | 2 | 2 |
| 53 | 1 | 1 | 1 | 1 | 2 | 2 | 2 | 2 | 2 |
| 54 | 1 | 2 | 2 | 2 | 2 | 2 | 2 | 2 | 1 |
| 55 | 2 | 2 | 2 | 2 | 2 | 2 | 1 | 2 | 1 |
| 56 | 2 | 1 | 2 | 2 | 2 | 2 | 2 | 2 | 1 |
| 57 | 2 | 1 | 2 | 2 | 2 | 2 | 2 | 2 | 1 |
| 58 | 2 | 1 | 2 | 2 | 2 | 2 | 2 | 2 | 1 |
| 59 | 2 | 1 | 2 | 2 | 2 | 2 | 2 | 2 | 1 |
| 60 | 2 | 1 | 1 | 2 | 2 | 2 | 1 | 2 | 2 |

|    |   |   |   |   |   |   |   |   |   |
|----|---|---|---|---|---|---|---|---|---|
| 1  |   |   |   |   |   |   |   |   |   |
| 2  | 2 | 2 | 2 | 2 | 2 | 2 | 2 | 2 | 1 |
| 3  | 2 | 1 | 1 | 2 | 2 | 2 | 2 | 2 | 1 |
| 4  | 2 | 1 | 2 | 2 | 2 | 2 | 2 | 2 | 2 |
| 5  | 2 | 1 | 1 | 2 | 2 | 2 | 2 | 2 | 1 |
| 6  | 2 | 1 | 1 | 2 | 2 | 2 | 2 | 2 | 1 |
| 7  | 2 | 2 | 1 | 2 | 2 | 2 | 2 | 2 | 1 |
| 8  | 2 | 1 | 1 | 1 | 2 | 2 | 2 | 2 | 1 |
| 9  | 2 | 1 | 1 | 1 | 1 | 2 | 2 | 2 | 2 |
| 10 | 2 | 1 | 2 | 2 | 2 | 2 | 2 | 2 | 1 |
| 11 | 2 | 1 | 2 | 2 | 2 | 2 | 2 | 2 | 2 |
| 12 | 2 | 1 | 2 | 2 | 2 | 2 | 1 | 2 | 1 |
| 13 | 2 | 2 | 2 | 2 | 2 | 2 | 2 | 2 | 1 |
| 14 | 2 | 1 | 2 | 2 | 2 | 2 | 2 | 2 | 1 |
| 15 | 2 | 2 | 2 | 2 | 2 | 2 | 2 | 2 | 1 |
| 16 | 2 | 1 | 2 | 2 | 2 | 1 | 2 | 2 | 1 |
| 17 | 2 | 2 | 2 | 2 | 2 | 2 | 1 | 2 | 1 |
| 18 | 1 | 1 | 1 | 2 | 2 | 2 | 2 | 2 | 1 |
| 19 | 2 | 2 | 2 | 2 | 2 | 2 | 2 | 2 | 2 |
| 20 | 2 | 2 | 2 | 2 | 1 | 2 | 2 | 2 | 1 |
| 21 | 2 | 1 | 2 | 2 | 2 | 2 | 2 | 2 | 1 |
| 22 | 2 | 2 | 2 | 2 | 2 | 2 | 2 | 2 | 2 |
| 23 | 2 | 2 | 2 | 1 | 2 | 2 | 2 | 2 | 1 |
| 24 | 2 | 1 | 1 | 2 | 2 | 2 | 2 | 2 | 1 |
| 25 | 2 | 2 | 2 | 2 | 2 | 2 | 2 | 2 | 2 |
| 26 | 2 | 1 | 1 | 2 | 2 | 2 | 2 | 2 | 1 |
| 27 | 2 | 2 | 2 | 2 | 2 | 2 | 2 | 2 | 2 |
| 28 | 2 | 1 | 1 | 2 | 2 | 2 | 2 | 1 | 1 |
| 29 | 2 | 1 | 1 | 1 | 2 | 2 | 2 | 2 | 1 |
| 30 | 2 | 1 | 2 | 2 | 2 | 2 | 2 | 2 | 1 |
| 31 | 2 | 1 | 2 | 1 | 2 | 2 | 2 | 2 | 1 |
| 32 | 1 | 1 | 2 | 1 | 2 | 2 | 2 | 2 | 1 |
| 33 | 2 | 2 | 2 | 2 | 2 | 2 | 2 | 2 | 1 |
| 34 | 2 | 2 | 1 | 2 | 2 | 2 | 2 | 2 | 1 |
| 35 | 2 | 1 | 1 | 2 | 2 | 2 | 2 | 2 | 1 |
| 36 | 2 | 1 | 1 | 2 | 2 | 2 | 2 | 2 | 1 |
| 37 | 2 | 1 | 2 | 2 | 1 | 2 | 2 | 2 | 1 |
| 38 | 2 | 1 | 1 | 2 | 2 | 2 | 2 | 2 | 1 |
| 39 | 2 | 1 | 2 | 2 | 2 | 2 | 2 | 2 | 1 |
| 40 | 2 | 1 | 2 | 2 | 2 | 2 | 2 | 2 | 1 |
| 41 | 2 | 1 | 1 | 2 | 2 | 2 | 2 | 2 | 2 |
| 42 | 2 | 1 | 1 | 2 | 2 | 2 | 2 | 2 | 1 |
| 43 | 2 | 1 | 1 | 2 | 1 | 2 | 1 | 2 | 2 |
| 44 | 2 | 2 | 2 | 2 | 2 | 2 | 2 | 2 | 1 |
| 45 | 2 | 1 | 2 | 2 | 2 | 2 | 1 | 2 | 1 |
| 46 | 2 | 1 | 2 | 2 | 2 | 2 | 2 | 2 | 1 |
| 47 | 2 | 1 | 2 | 2 | 2 | 2 | 2 | 2 | 1 |
| 48 | 2 | 1 | 2 | 2 | 2 | 2 | 1 | 2 | 1 |
| 49 | 2 | 1 | 2 | 1 | 2 | 2 | 1 | 2 | 1 |
| 50 | 2 | 1 | 2 | 2 | 2 | 2 | 1 | 2 | 1 |
| 51 | 2 | 1 | 2 | 2 | 2 | 2 | 2 | 2 | 2 |
| 52 | 2 | 1 | 2 | 1 | 2 | 2 | 2 | 2 | 1 |
| 53 | 2 | 1 | 2 | 2 | 2 | 2 | 2 | 2 | 1 |
| 54 | 2 | 1 | 2 | 2 | 2 | 2 | 2 | 2 | 1 |
| 55 | 1 | 1 | 2 | 1 | 2 | 2 | 1 | 2 | 1 |
| 56 | 2 | 2 | 2 | 1 | 2 | 2 | 2 | 2 | 2 |
| 57 | 2 | 1 | 1 | 2 | 2 | 2 | 1 | 2 | 1 |
| 58 | 1 | 1 | 2 | 2 | 1 | 1 | 2 | 2 | 1 |
| 59 | 2 | 1 | 1 | 2 | 2 | 2 | 2 | 2 | 1 |
| 60 | 2 | 1 | 1 | 2 | 2 | 2 | 2 | 2 | 1 |

|    |   |   |   |   |   |   |   |   |   |
|----|---|---|---|---|---|---|---|---|---|
| 1  |   |   |   |   |   |   |   |   |   |
| 2  | 2 | 1 | 2 | 2 | 2 | 2 | 1 | 2 | 1 |
| 3  | 1 | 1 | 1 | 1 | 2 | 2 | 2 | 2 | 1 |
| 4  | 2 | 2 | 2 | 2 | 2 | 2 | 2 | 2 | 1 |
| 5  | 2 | 1 | 2 | 1 | 2 | 2 | 1 | 2 | 1 |
| 6  | 2 | 1 | 1 | 2 | 2 | 2 | 2 | 2 | 2 |
| 7  | 2 | 1 | 2 | 1 | 2 | 2 | 2 | 2 | 2 |
| 8  | 2 | 1 | 1 | 2 | 2 | 2 | 2 | 2 | 1 |
| 9  | 2 | 1 | 1 | 2 | 2 | 2 | 2 | 2 | 1 |
| 10 | 2 | 1 | 1 | 2 | 1 | 2 | 2 | 2 | 1 |
| 11 | 2 | 1 | 1 | 2 | 2 | 2 | 2 | 2 | 1 |
| 12 | 2 | 1 | 2 | 1 | 2 | 2 | 2 | 2 | 1 |
| 13 | 2 | 2 | 2 | 2 | 2 | 2 | 2 | 2 | 1 |
| 14 | 2 | 2 | 2 | 2 | 2 | 2 | 2 | 2 | 1 |
| 15 | 2 | 1 | 2 | 1 | 2 | 2 | 2 | 2 | 1 |
| 16 | 2 | 1 | 2 | 2 | 2 | 2 | 1 | 2 | 1 |
| 17 | 2 | 1 | 1 | 2 | 2 | 2 | 1 | 2 | 1 |
| 18 | 2 | 1 | 1 | 2 | 2 | 2 | 1 | 2 | 1 |
| 19 | 2 | 1 | 2 | 2 | 2 | 2 | 2 | 2 | 2 |
| 20 | 2 | 1 | 1 | 2 | 2 | 2 | 1 | 2 | 1 |
| 21 | 2 | 1 | 1 | 2 | 1 | 2 | 2 | 2 | 1 |
| 22 | 2 | 1 | 1 | 2 | 2 | 2 | 2 | 2 | 1 |
| 23 | 2 | 1 | 1 | 2 | 2 | 2 | 1 | 2 | 1 |
| 24 | 1 | 1 | 2 | 1 | 2 | 2 | 2 | 2 | 1 |
| 25 | 2 | 1 | 2 | 2 | 2 | 2 | 2 | 2 | 1 |
| 26 | 2 | 2 | 2 | 2 | 2 | 2 | 2 | 2 | 1 |
| 27 | 2 | 1 | 1 | 2 | 2 | 2 | 2 | 2 | 2 |
| 28 | 2 | 1 | 2 | 1 | 2 | 1 | 2 | 2 | 2 |
| 29 | 2 | 1 | 2 | 1 | 2 | 2 | 2 | 2 | 1 |
| 30 | 1 | 1 | 1 | 2 | 2 | 2 | 2 | 2 | 2 |
| 31 | 2 | 1 | 2 | 1 | 1 | 2 | 1 | 2 | 2 |
| 32 | 2 | 1 | 2 | 2 | 2 | 2 | 2 | 2 | 1 |
| 33 | 1 | 1 | 2 | 2 | 2 | 2 | 2 | 2 | 1 |
| 34 | 1 | 1 | 2 | 2 | 2 | 1 | 2 | 2 | 1 |
| 35 | 2 | 1 | 2 | 2 | 1 | 2 | 2 | 2 | 1 |
| 36 | 2 | 1 | 2 | 2 | 2 | 2 | 2 | 2 | 1 |
| 37 | 2 | 1 | 2 | 2 | 2 | 2 | 2 | 2 | 1 |
| 38 | 2 | 1 | 2 | 2 | 2 | 2 | 2 | 2 | 2 |
| 39 | 2 | 1 | 1 | 1 | 2 | 2 | 2 | 2 | 1 |
| 40 | 2 | 1 | 2 | 2 | 2 | 2 | 2 | 2 | 1 |
| 41 | 2 | 1 | 1 | 1 | 2 | 2 | 2 | 2 | 1 |
| 42 | 2 | 1 | 1 | 2 | 2 | 2 | 2 | 2 | 1 |
| 43 | 2 | 1 | 2 | 2 | 1 | 2 | 1 | 2 | 1 |
| 44 | 2 | 1 | 1 | 1 | 2 | 2 | 2 | 2 | 1 |
| 45 | 2 | 1 | 1 | 2 | 2 | 2 | 1 | 2 | 1 |
| 46 | 2 | 1 | 2 | 2 | 2 | 2 | 2 | 2 | 2 |
| 47 | 2 | 1 | 1 | 2 | 2 | 2 | 2 | 2 | 1 |
| 48 | 2 | 1 | 2 | 2 | 2 | 2 | 2 | 2 | 1 |
| 49 | 2 | 1 | 2 | 1 | 2 | 2 | 2 | 2 | 1 |
| 50 | 2 | 2 | 2 | 2 | 2 | 2 | 2 | 2 | 1 |
| 51 | 1 | 1 | 2 | 2 | 2 | 2 | 2 | 2 | 1 |
| 52 | 2 | 1 | 2 | 2 | 2 | 2 | 1 | 2 | 1 |
| 53 | 2 | 1 | 2 | 1 | 2 | 2 | 2 | 2 | 1 |
| 54 | 2 | 1 | 1 | 2 | 2 | 2 | 2 | 2 | 1 |
| 55 | 2 | 1 | 2 | 2 | 2 | 2 | 2 | 2 | 1 |
| 56 | 2 | 1 | 1 | 2 | 2 | 2 | 2 | 2 | 1 |
| 57 | 2 | 1 | 2 | 2 | 2 | 2 | 2 | 2 | 1 |
| 58 | 2 | 1 | 2 | 1 | 2 | 2 | 2 | 2 | 1 |
| 59 | 2 | 1 | 2 | 2 | 2 | 2 | 2 | 2 | 1 |
| 60 | 2 | 1 | 2 | 1 | 2 | 2 | 2 | 2 | 1 |



|    |   |   |   |   |   |   |   |   |   |
|----|---|---|---|---|---|---|---|---|---|
| 1  |   |   |   |   |   |   |   |   |   |
| 2  | 1 | 1 | 2 | 1 | 1 | 1 | 2 | 2 | 2 |
| 3  | 2 | 1 | 1 | 2 | 2 | 2 | 2 | 2 | 1 |
| 4  | 2 | 1 | 2 | 2 | 2 | 2 | 2 | 2 | 1 |
| 5  | 2 | 1 | 1 | 2 | 2 | 2 | 2 | 2 | 2 |
| 6  | 2 | 1 | 2 | 1 | 2 | 2 | 2 | 2 | 2 |
| 7  | 2 | 1 | 2 | 2 | 2 | 2 | 1 | 2 | 1 |
| 8  | 2 | 1 | 2 | 1 | 2 | 2 | 2 | 2 | 1 |
| 9  | 2 | 1 | 2 | 2 | 2 | 2 | 1 | 2 | 2 |
| 10 | 2 | 1 | 1 | 2 | 2 | 2 | 2 | 2 | 1 |
| 11 | 2 | 1 | 1 | 2 | 2 | 2 | 2 | 2 | 1 |
| 12 | 2 | 1 | 1 | 2 | 2 | 2 | 2 | 2 | 1 |
| 13 | 2 | 1 | 2 | 2 | 2 | 2 | 2 | 2 | 1 |
| 14 | 2 | 1 | 2 | 2 | 2 | 2 | 2 | 2 | 1 |
| 15 | 2 | 1 | 2 | 2 | 2 | 2 | 2 | 2 | 1 |
| 16 | 1 | 1 | 2 | 2 | 1 | 2 | 2 | 2 | 2 |
| 17 | 2 | 1 | 1 | 1 | 2 | 2 | 2 | 2 | 1 |
| 18 | 2 | 1 | 1 | 2 | 2 | 2 | 1 | 2 | 1 |
| 19 | 2 | 1 | 1 | 2 | 2 | 2 | 1 | 2 | 1 |
| 20 | 2 | 1 | 1 | 2 | 2 | 2 | 2 | 2 | 1 |
| 21 | 2 | 1 | 2 | 2 | 2 | 2 | 2 | 2 | 1 |
| 22 | 2 | 1 | 2 | 2 | 2 | 2 | 2 | 2 | 2 |
| 23 | 2 | 1 | 2 | 2 | 2 | 2 | 2 | 2 | 1 |
| 24 | 2 | 1 | 1 | 2 | 2 | 2 | 2 | 2 | 1 |
| 25 | 2 | 1 | 1 | 2 | 2 | 2 | 2 | 2 | 1 |
| 26 | 2 | 1 | 2 | 2 | 2 | 2 | 2 | 2 | 1 |
| 27 | 2 | 1 | 2 | 2 | 2 | 2 | 1 | 2 | 1 |
| 28 | 2 | 2 | 2 | 2 | 2 | 2 | 2 | 2 | 1 |
| 29 | 2 | 1 | 1 | 2 | 2 | 2 | 2 | 2 | 1 |
| 30 | 1 | 1 | 1 | 2 | 2 | 2 | 1 | 2 | 1 |
| 31 | 2 | 2 | 2 | 1 | 2 | 2 | 2 | 2 | 1 |
| 32 | 2 | 2 | 2 | 2 | 2 | 2 | 2 | 2 | 2 |
| 33 | 1 | 1 | 2 | 1 | 2 | 2 | 2 | 2 | 1 |
| 34 | 2 | 1 | 2 | 2 | 2 | 2 | 2 | 2 | 1 |
| 35 | 2 | 1 | 1 | 2 | 2 | 2 | 2 | 2 | 1 |
| 36 | 2 | 1 | 1 | 2 | 2 | 2 | 2 | 2 | 1 |
| 37 | 2 | 1 | 2 | 1 | 2 | 2 | 2 | 2 | 1 |
| 38 | 2 | 1 | 2 | 2 | 2 | 2 | 2 | 2 | 1 |
| 39 | 2 | 1 | 2 | 2 | 2 | 2 | 2 | 2 | 1 |
| 40 | 2 | 2 | 2 | 2 | 2 | 2 | 2 | 2 | 1 |
| 41 | 2 | 1 | 1 | 1 | 2 | 2 | 2 | 2 | 1 |
| 42 | 2 | 1 | 2 | 1 | 2 | 2 | 2 | 2 | 2 |
| 43 | 2 | 2 | 2 | 2 | 2 | 2 | 2 | 2 | 1 |
| 44 | 2 | 2 | 1 | 2 | 2 | 2 | 2 | 2 | 1 |
| 45 | 2 | 1 | 2 | 2 | 2 | 2 | 2 | 2 | 1 |
| 46 | 2 | 1 | 2 | 2 | 2 | 2 | 2 | 2 | 1 |
| 47 | 2 | 1 | 2 | 2 | 2 | 2 | 2 | 2 | 2 |
| 48 | 2 | 2 | 2 | 1 | 2 | 2 | 2 | 2 | 1 |
| 49 | 2 | 1 | 2 | 2 | 2 | 2 | 2 | 2 | 1 |
| 50 | 2 | 1 | 2 | 2 | 2 | 2 | 2 | 2 | 1 |
| 51 | 2 | 2 | 2 | 2 | 2 | 2 | 2 | 2 | 1 |
| 52 | 2 | 2 | 2 | 2 | 2 | 2 | 2 | 2 | 1 |
| 53 | 2 | 1 | 2 | 2 | 2 | 2 | 2 | 2 | 1 |
| 54 | 2 | 1 | 1 | 2 | 2 | 2 | 2 | 2 | 1 |
| 55 | 2 | 1 | 2 | 2 | 2 | 2 | 2 | 2 | 2 |
| 56 | 2 | 1 | 2 | 2 | 2 | 2 | 2 | 2 | 1 |
| 57 | 1 | 1 | 1 | 2 | 2 | 2 | 2 | 2 | 2 |
| 58 | 2 | 1 | 2 | 2 | 2 | 2 | 2 | 2 | 1 |
| 59 | 2 | 1 | 1 | 1 | 2 | 2 | 2 | 2 | 2 |
| 60 | 2 | 1 | 1 | 1 | 2 | 2 | 2 | 2 | 2 |

|    |   |   |   |   |   |   |   |   |   |
|----|---|---|---|---|---|---|---|---|---|
| 1  |   |   |   |   |   |   |   |   |   |
| 2  | 2 | 1 | 2 | 2 | 2 | 2 | 2 | 2 | 1 |
| 3  | 2 | 1 | 1 | 1 | 2 | 2 | 2 | 2 | 1 |
| 4  | 2 | 1 | 2 | 1 | 2 | 2 | 2 | 2 | 1 |
| 5  | 2 | 1 | 2 | 2 | 2 | 2 | 2 | 2 | 1 |
| 6  |   |   |   |   |   |   |   |   |   |
| 7  | 1 | 1 | 1 | 1 | 2 | 1 | 2 | 2 | 1 |
| 8  | 1 | 1 | 2 | 2 | 2 | 2 | 2 | 2 | 1 |
| 9  | 2 | 1 | 2 | 1 | 2 | 2 | 1 | 2 | 2 |
| 10 | 2 | 1 | 2 | 2 | 2 | 2 | 2 | 2 | 1 |
| 11 | 2 | 1 | 2 | 2 | 2 | 2 | 2 | 2 | 1 |
| 12 | 2 | 1 | 2 | 1 | 2 | 2 | 2 | 2 | 1 |
| 13 | 2 | 1 | 2 | 2 | 2 | 2 | 2 | 2 | 1 |
| 14 | 2 | 1 | 2 | 2 | 2 | 2 | 2 | 2 | 1 |
| 15 | 2 | 1 | 1 | 2 | 2 | 2 | 2 | 2 | 1 |
| 16 | 2 | 1 | 1 | 2 | 2 | 2 | 1 | 2 | 2 |
| 17 | 2 | 2 | 1 | 2 | 2 | 2 | 2 | 2 | 2 |
| 18 | 2 | 1 | 1 | 1 | 2 | 2 | 2 | 2 | 1 |
| 19 | 2 | 2 | 2 | 2 | 2 | 2 | 2 | 2 | 1 |
| 20 | 2 | 2 | 2 | 2 | 2 | 2 | 2 | 2 | 1 |
| 21 | 2 | 1 | 2 | 2 | 2 | 2 | 2 | 2 | 1 |
| 22 | 1 | 2 | 2 | 2 | 2 | 1 | 2 | 2 | 2 |
| 23 | 2 | 1 | 2 | 2 | 2 | 2 | 2 | 2 | 1 |
| 24 | 2 | 1 | 2 | 2 | 2 | 2 | 1 | 2 | 1 |
| 25 | 2 | 1 | 2 | 1 | 2 | 2 | 2 | 2 | 1 |
| 26 | 2 | 1 | 1 | 1 | 2 | 2 | 1 | 2 | 1 |
| 27 | 2 | 1 | 1 | 1 | 2 | 2 | 2 | 2 | 1 |
| 28 | 2 | 1 | 2 | 2 | 2 | 2 | 2 | 2 | 2 |
| 29 | 1 | 1 | 1 | 1 | 2 | 2 | 2 | 2 | 1 |
| 30 | 2 | 1 | 1 | 2 | 2 | 2 | 2 | 2 | 2 |
| 31 | 2 | 1 | 2 | 1 | 2 | 2 | 2 | 2 | 1 |
| 32 | 2 | 1 | 2 | 2 | 1 | 2 | 2 | 2 | 1 |
| 33 | 2 | 1 | 2 | 2 | 2 | 1 | 2 | 2 | 1 |
| 34 | 2 | 1 | 1 | 2 | 2 | 2 | 2 | 2 | 1 |
| 35 | 2 | 1 | 2 | 1 | 2 | 2 | 2 | 2 | 1 |
| 36 | 2 | 1 | 2 | 2 | 2 | 2 | 2 | 2 | 1 |
| 37 | 2 | 1 | 2 | 2 | 2 | 2 | 2 | 2 | 1 |
| 38 | 2 | 1 | 2 | 2 | 2 | 2 | 2 | 2 | 1 |
| 39 | 2 | 1 | 2 | 2 | 2 | 2 | 2 | 2 | 2 |
| 40 | 2 | 1 | 1 | 1 | 2 | 2 | 2 | 2 | 1 |
| 41 | 1 | 1 | 2 | 2 | 2 | 2 | 2 | 2 | 2 |
| 42 | 2 | 1 | 2 | 1 | 2 | 2 | 2 | 2 | 2 |
| 43 | 2 | 1 | 2 | 2 | 2 | 2 | 2 | 2 | 1 |
| 44 | 2 | 1 | 2 | 2 | 2 | 2 | 2 | 2 | 1 |
| 45 | 2 | 1 | 2 | 2 | 2 | 2 | 1 | 2 | 1 |
| 46 | 1 | 1 | 2 | 2 | 2 | 2 | 1 | 2 | 1 |
| 47 | 1 | 1 | 2 | 2 | 2 | 2 | 2 | 2 | 1 |
| 48 | 2 | 1 | 1 | 2 | 2 | 2 | 2 | 2 | 2 |
| 49 | 2 | 1 | 1 | 2 | 2 | 2 | 2 | 2 | 1 |
| 50 | 2 | 1 | 1 | 2 | 2 | 2 | 2 | 2 | 1 |
| 51 | 2 | 1 | 1 | 2 | 2 | 2 | 2 | 2 | 2 |
| 52 | 2 | 1 | 2 | 1 | 2 | 2 | 2 | 2 | 2 |
| 53 | 2 | 1 | 1 | 2 | 2 | 2 | 2 | 2 | 1 |
| 54 | 1 | 1 | 1 | 2 | 1 | 2 | 2 | 2 | 1 |
| 55 | 2 | 1 | 2 | 2 | 2 | 2 | 1 | 2 | 1 |
| 56 | 1 | 1 | 2 | 1 | 2 | 2 | 2 | 2 | 2 |
| 57 | 2 | 1 | 1 | 2 | 1 | 2 | 2 | 2 | 2 |
| 58 | 2 | 1 | 1 | 2 | 2 | 2 | 1 | 2 | 2 |
| 59 | 2 | 1 | 1 | 2 | 2 | 2 | 2 | 2 | 2 |
| 60 | 2 | 1 | 1 | 2 | 2 | 2 | 2 | 2 | 1 |

|    |   |   |   |   |   |   |   |   |   |
|----|---|---|---|---|---|---|---|---|---|
| 1  |   |   |   |   |   |   |   |   |   |
| 2  | 2 | 1 | 1 | 2 | 2 | 2 | 2 | 2 | 1 |
| 3  | 2 | 2 | 2 | 2 | 2 | 2 | 2 | 2 | 1 |
| 4  | 2 | 1 | 1 | 1 | 2 | 2 | 2 | 2 | 1 |
| 5  | 2 | 2 | 2 | 1 | 2 | 2 | 2 | 2 | 1 |
| 6  | 2 | 2 | 2 | 2 | 2 | 2 | 2 | 2 | 1 |
| 7  | 2 | 2 | 2 | 2 | 2 | 2 | 2 | 2 | 1 |
| 8  | 2 | 1 | 2 | 2 | 2 | 2 | 2 | 2 | 1 |
| 9  | 2 | 1 | 1 | 2 | 1 | 2 | 2 | 2 | 1 |
| 10 | 2 | 1 | 1 | 2 | 2 | 2 | 2 | 2 | 1 |
| 11 | 2 | 1 | 2 | 2 | 2 | 1 | 1 | 2 | 1 |
| 12 | 2 | 1 | 1 | 2 | 2 | 2 | 2 | 2 | 1 |
| 13 | 2 | 1 | 2 | 2 | 2 | 2 | 1 | 2 | 1 |
| 14 | 2 | 1 | 2 | 2 | 2 | 2 | 2 | 2 | 1 |
| 15 | 2 | 1 | 2 | 1 | 2 | 2 | 2 | 2 | 1 |
| 16 | 2 | 1 | 1 | 2 | 2 | 2 | 2 | 2 | 1 |
| 17 | 2 | 1 | 2 | 2 | 2 | 2 | 2 | 2 | 1 |
| 18 | 1 | 1 | 1 | 2 | 2 | 2 | 2 | 2 | 1 |
| 19 | 2 | 1 | 1 | 1 | 2 | 2 | 2 | 2 | 2 |
| 20 | 2 | 1 | 2 | 2 | 2 | 2 | 2 | 2 | 2 |
| 21 | 2 | 1 | 2 | 2 | 2 | 2 | 2 | 2 | 2 |
| 22 | 2 | 1 | 2 | 2 | 2 | 2 | 1 | 2 | 1 |
| 23 | 2 | 1 | 1 | 2 | 2 | 2 | 2 | 2 | 1 |
| 24 | 2 | 1 | 1 | 2 | 2 | 2 | 1 | 2 | 1 |
| 25 | 2 | 1 | 1 | 2 | 1 | 2 | 2 | 2 | 1 |
| 26 | 2 | 1 | 1 | 2 | 2 | 2 | 2 | 2 | 1 |
| 27 | 2 | 1 | 1 | 2 | 2 | 2 | 2 | 2 | 1 |
| 28 | 2 | 1 | 2 | 2 | 2 | 2 | 1 | 2 | 1 |
| 29 | 2 | 2 | 2 | 2 | 2 | 2 | 2 | 2 | 2 |
| 30 | 2 | 1 | 1 | 2 | 2 | 2 | 2 | 2 | 2 |
| 31 | 2 | 1 | 1 | 2 | 2 | 2 | 2 | 2 | 2 |
| 32 | 2 | 1 | 1 | 2 | 2 | 2 | 2 | 2 | 1 |
| 33 | 1 | 2 | 1 | 2 | 2 | 2 | 2 | 2 | 1 |
| 34 | 2 | 1 | 1 | 2 | 2 | 2 | 1 | 2 | 1 |
| 35 | 2 | 1 | 1 | 2 | 2 | 2 | 1 | 2 | 1 |
| 36 | 2 | 1 | 1 | 1 | 2 | 2 | 2 | 2 | 2 |
| 37 | 2 | 1 | 2 | 1 | 2 | 2 | 1 | 2 | 1 |
| 38 | 2 | 1 | 1 | 2 | 2 | 2 | 2 | 2 | 2 |
| 39 | 2 | 1 | 1 | 2 | 2 | 2 | 2 | 2 | 2 |
| 40 | 2 | 1 | 1 | 2 | 2 | 2 | 2 | 2 | 1 |
| 41 | 2 | 1 | 1 | 2 | 2 | 2 | 1 | 2 | 2 |
| 42 | 2 | 1 | 1 | 2 | 2 | 2 | 2 | 2 | 1 |
| 43 | 2 | 1 | 2 | 2 | 2 | 2 | 2 | 2 | 1 |
| 44 | 2 | 1 | 1 | 2 | 2 | 2 | 2 | 2 | 1 |
| 45 | 2 | 1 | 1 | 2 | 2 | 2 | 2 | 2 | 1 |
| 46 | 1 | 1 | 1 | 1 | 2 | 2 | 2 | 2 | 1 |
| 47 | 2 | 1 | 2 | 2 | 1 | 2 | 1 | 2 | 2 |
| 48 | 2 | 1 | 1 | 1 | 2 | 2 | 2 | 2 | 1 |
| 49 | 2 | 1 | 1 | 2 | 2 | 2 | 1 | 2 | 1 |
| 50 | 2 | 1 | 2 | 2 | 2 | 2 | 2 | 2 | 2 |
| 51 | 2 | 1 | 1 | 2 | 2 | 2 | 1 | 2 | 1 |
| 52 | 1 | 1 | 1 | 2 | 2 | 2 | 2 | 2 | 1 |
| 53 | 2 | 1 | 1 | 2 | 2 | 2 | 1 | 2 | 1 |
| 54 | 2 | 1 | 1 | 2 | 2 | 2 | 1 | 2 | 1 |
| 55 | 2 | 1 | 1 | 1 | 2 | 2 | 1 | 2 | 1 |
| 56 | 2 | 1 | 1 | 2 | 2 | 2 | 2 | 2 | 2 |
| 57 | 2 | 1 | 1 | 1 | 2 | 2 | 1 | 2 | 1 |
| 58 | 2 | 1 | 1 | 1 | 2 | 2 | 1 | 2 | 1 |
| 59 | 2 | 1 | 1 | 1 | 2 | 2 | 2 | 2 | 1 |
| 60 | 1 | 2 | 2 | 2 | 2 | 2 | 2 | 2 | 2 |

|    |   |   |   |   |   |   |   |   |   |
|----|---|---|---|---|---|---|---|---|---|
| 1  |   |   |   |   |   |   |   |   |   |
| 2  | 2 | 1 | 1 | 2 | 2 | 2 | 2 | 2 | 1 |
| 3  | 2 | 1 | 1 | 2 | 2 | 2 | 2 | 2 | 2 |
| 4  | 2 | 1 | 1 | 2 | 2 | 2 | 2 | 2 | 1 |
| 5  | 2 | 1 | 2 | 2 | 2 | 2 | 2 | 2 | 1 |
| 6  | 2 | 1 | 1 | 1 | 2 | 2 | 2 | 2 | 1 |
| 7  | 2 | 2 | 2 | 2 | 2 | 1 | 1 | 2 | 2 |
| 8  | 2 | 1 | 1 | 2 | 2 | 2 | 2 | 2 | 1 |
| 9  | 2 | 1 | 1 | 2 | 2 | 2 | 2 | 2 | 1 |
| 10 | 2 | 1 | 1 | 2 | 1 | 2 | 2 | 2 | 1 |
| 11 | 2 | 1 | 1 | 2 | 2 | 2 | 1 | 2 | 1 |
| 12 | 2 | 1 | 1 | 2 | 2 | 2 | 2 | 2 | 1 |
| 13 | 2 | 1 | 1 | 2 | 2 | 2 | 2 | 2 | 1 |
| 14 | 2 | 1 | 1 | 2 | 2 | 2 | 2 | 2 | 1 |
| 15 | 2 | 1 | 2 | 2 | 2 | 2 | 2 | 1 | 1 |
| 16 | 1 | 1 | 1 | 2 | 2 | 2 | 2 | 2 | 1 |
| 17 | 2 | 2 | 1 | 1 | 2 | 2 | 2 | 2 | 1 |
| 18 | 1 | 1 | 1 | 2 | 2 | 2 | 2 | 2 | 1 |
| 19 | 2 | 1 | 1 | 2 | 2 | 2 | 1 | 2 | 2 |
| 20 | 1 | 1 | 1 | 2 | 1 | 2 | 2 | 2 | 1 |
| 21 | 2 | 1 | 1 | 2 | 2 | 2 | 2 | 2 | 1 |
| 22 | 2 | 1 | 1 | 2 | 2 | 2 | 2 | 2 | 1 |
| 23 | 2 | 1 | 1 | 2 | 2 | 2 | 2 | 2 | 1 |
| 24 | 1 | 1 | 1 | 2 | 2 | 2 | 2 | 2 | 2 |
| 25 | 2 | 1 | 1 | 2 | 2 | 2 | 2 | 2 | 2 |
| 26 | 2 | 2 | 2 | 2 | 2 | 2 | 2 | 2 | 2 |
| 27 | 2 | 1 | 1 | 1 | 2 | 2 | 1 | 2 | 1 |
| 28 | 2 | 1 | 1 | 2 | 2 | 2 | 2 | 2 | 2 |
| 29 | 2 | 2 | 1 | 2 | 2 | 2 | 2 | 2 | 1 |
| 30 | 2 | 1 | 1 | 2 | 2 | 1 | 1 | 2 | 2 |
| 31 | 2 | 1 | 1 | 1 | 1 | 2 | 2 | 2 | 1 |
| 32 | 1 | 1 | 1 | 2 | 2 | 2 | 2 | 2 | 2 |
| 33 | 2 | 1 | 1 | 2 | 1 | 2 | 2 | 2 | 2 |
| 34 | 2 | 1 | 1 | 1 | 2 | 2 | 2 | 2 | 2 |
| 35 | 2 | 1 | 1 | 2 | 2 | 2 | 2 | 2 | 2 |
| 36 | 2 | 1 | 1 | 1 | 2 | 2 | 2 | 2 | 2 |
| 37 | 2 | 1 | 1 | 2 | 1 | 2 | 2 | 2 | 1 |
| 38 | 2 | 1 | 1 | 2 | 2 | 2 | 2 | 2 | 2 |
| 39 | 1 | 1 | 1 | 2 | 2 | 2 | 1 | 2 | 2 |
| 40 | 2 | 1 | 1 | 2 | 2 | 2 | 1 | 2 | 2 |
| 41 | 2 | 1 | 1 | 2 | 2 | 2 | 1 | 2 | 2 |
| 42 | 2 | 1 | 1 | 2 | 2 | 2 | 1 | 2 | 2 |
| 43 | 2 | 1 | 1 | 1 | 2 | 2 | 2 | 2 | 1 |
| 44 | 1 | 1 | 1 | 2 | 2 | 2 | 2 | 2 | 2 |
| 45 | 2 | 1 | 1 | 2 | 2 | 2 | 2 | 2 | 2 |
| 46 | 2 | 1 | 1 | 1 | 2 | 2 | 1 | 2 | 2 |
| 47 | 2 | 1 | 1 | 2 | 2 | 2 | 2 | 2 | 1 |
| 48 | 2 | 1 | 1 | 2 | 1 | 2 | 2 | 2 | 2 |
| 49 | 2 | 1 | 1 | 2 | 2 | 2 | 2 | 2 | 2 |
| 50 | 2 | 1 | 1 | 2 | 2 | 2 | 1 | 2 | 2 |
| 51 | 2 | 1 | 1 | 2 | 2 | 2 | 1 | 2 | 1 |
| 52 | 2 | 2 | 2 | 2 | 2 | 2 | 1 | 2 | 1 |
| 53 | 2 | 1 | 1 | 2 | 2 | 2 | 2 | 2 | 2 |
| 54 | 2 | 1 | 1 | 2 | 2 | 2 | 2 | 2 | 1 |
| 55 | 2 | 1 | 1 | 2 | 2 | 2 | 2 | 2 | 1 |
| 56 | 2 | 1 | 1 | 2 | 2 | 2 | 2 | 2 | 1 |
| 57 | 2 | 1 | 1 | 2 | 2 | 2 | 1 | 2 | 1 |
| 58 | 1 | 1 | 1 | 2 | 2 | 2 | 1 | 2 | 1 |
| 59 | 2 | 1 | 1 | 1 | 2 | 2 | 2 | 2 | 1 |
| 60 | 2 | 1 | 1 | 1 | 2 | 2 | 2 | 2 | 1 |

|    |   |   |   |   |   |   |   |   |   |
|----|---|---|---|---|---|---|---|---|---|
| 1  |   |   |   |   |   |   |   |   |   |
| 2  | 2 | 1 | 1 | 2 | 2 | 2 | 1 | 2 | 1 |
| 3  | 2 | 1 | 1 | 2 | 2 | 2 | 2 | 2 | 1 |
| 4  | 2 | 1 | 1 | 2 | 2 | 2 | 2 | 2 | 1 |
| 5  | 1 | 1 | 1 | 2 | 1 | 2 | 2 | 2 | 1 |
| 6  | 2 | 1 | 1 | 2 | 2 | 2 | 1 | 2 | 2 |
| 7  | 2 | 1 | 1 | 2 | 2 | 2 | 2 | 2 | 1 |
| 8  | 2 | 1 | 1 | 2 | 2 | 2 | 2 | 2 | 2 |
| 9  | 2 | 1 | 1 | 2 | 2 | 2 | 2 | 2 | 2 |
| 10 | 2 | 1 | 1 | 2 | 2 | 2 | 2 | 2 | 1 |
| 11 | 2 | 1 | 1 | 2 | 2 | 2 | 2 | 2 | 1 |
| 12 | 2 | 1 | 1 | 2 | 2 | 2 | 2 | 2 | 1 |
| 13 | 2 | 1 | 1 | 2 | 2 | 2 | 2 | 2 | 1 |
| 14 | 2 | 1 | 1 | 2 | 2 | 2 | 2 | 2 | 1 |
| 15 | 2 | 1 | 1 | 2 | 2 | 2 | 2 | 2 | 1 |
| 16 | 2 | 1 | 1 | 2 | 2 | 2 | 2 | 2 | 1 |
| 17 | 2 | 1 | 1 | 2 | 1 | 2 | 1 | 2 | 1 |
| 18 | 2 | 1 | 1 | 2 | 2 | 2 | 2 | 2 | 1 |
| 19 | 2 | 1 | 1 | 2 | 2 | 2 | 2 | 2 | 1 |
| 20 | 2 | 1 | 1 | 2 | 2 | 2 | 2 | 2 | 1 |
| 21 | 2 | 1 | 1 | 2 | 1 | 2 | 2 | 2 | 1 |
| 22 | 2 | 1 | 1 | 2 | 2 | 2 | 1 | 2 | 1 |
| 23 | 2 | 1 | 1 | 2 | 2 | 2 | 2 | 2 | 1 |
| 24 | 1 | 2 | 1 | 2 | 1 | 2 | 1 | 2 | 1 |
| 25 | 2 | 1 | 2 | 2 | 2 | 2 | 1 | 2 | 2 |
| 26 | 2 | 1 | 1 | 1 | 1 | 2 | 2 | 2 | 1 |
| 27 | 2 | 1 | 1 | 2 | 1 | 2 | 2 | 2 | 1 |
| 28 | 2 | 1 | 1 | 2 | 2 | 2 | 2 | 2 | 1 |
| 29 | 2 | 1 | 1 | 2 | 2 | 2 | 2 | 2 | 1 |
| 30 | 2 | 1 | 1 | 2 | 2 | 2 | 1 | 2 | 1 |
| 31 | 2 | 2 | 2 | 2 | 2 | 2 | 1 | 2 | 2 |
| 32 | 2 | 1 | 1 | 2 | 2 | 2 | 2 | 2 | 1 |
| 33 | 2 | 1 | 1 | 1 | 1 | 2 | 1 | 2 | 1 |
| 34 | 1 | 1 | 1 | 2 | 2 | 2 | 2 | 2 | 1 |
| 35 | 2 | 1 | 1 | 2 | 2 | 2 | 2 | 2 | 1 |
| 36 | 2 | 1 | 1 | 2 | 2 | 2 | 2 | 2 | 1 |
| 37 | 2 | 1 | 1 | 2 | 2 | 2 | 2 | 2 | 1 |
| 38 | 2 | 1 | 1 | 2 | 1 | 2 | 2 | 2 | 2 |
| 39 | 2 | 1 | 1 | 2 | 2 | 2 | 1 | 2 | 1 |
| 40 | 2 | 1 | 1 | 2 | 2 | 2 | 1 | 2 | 1 |
| 41 | 1 | 2 | 1 | 2 | 2 | 2 | 2 | 2 | 1 |
| 42 | 2 | 1 | 2 | 2 | 2 | 2 | 2 | 2 | 1 |
| 43 | 2 | 1 | 1 | 2 | 2 | 2 | 2 | 2 | 2 |
| 44 | 2 | 1 | 1 | 2 | 1 | 2 | 2 | 2 | 1 |
| 45 | 2 | 1 | 2 | 2 | 2 | 2 | 1 | 2 | 1 |
| 46 | 1 | 2 | 2 | 2 | 2 | 2 | 2 | 2 | 1 |
| 47 | 2 | 1 | 2 | 2 | 2 | 2 | 2 | 2 | 1 |
| 48 | 2 | 2 | 2 | 2 | 2 | 2 | 2 | 2 | 1 |
| 49 | 2 | 1 | 2 | 2 | 2 | 2 | 1 | 2 | 1 |
| 50 | 2 | 1 | 2 | 2 | 2 | 2 | 2 | 2 | 1 |
| 51 | 2 | 1 | 2 | 2 | 2 | 2 | 2 | 2 | 1 |
| 52 | 2 | 1 | 1 | 2 | 2 | 2 | 2 | 2 | 1 |
| 53 | 2 | 1 | 2 | 2 | 2 | 2 | 2 | 2 | 1 |
| 54 | 2 | 1 | 2 | 2 | 2 | 2 | 1 | 2 | 1 |
| 55 | 2 | 1 | 2 | 1 | 2 | 2 | 2 | 2 | 1 |
| 56 | 2 | 1 | 1 | 2 | 2 | 2 | 2 | 2 | 1 |
| 57 | 2 | 1 | 2 | 2 | 2 | 2 | 2 | 2 | 1 |
| 58 | 2 | 1 | 2 | 2 | 2 | 2 | 2 | 2 | 1 |
| 59 | 2 | 1 | 2 | 2 | 2 | 2 | 2 | 2 | 1 |
| 60 | 2 | 1 | 2 | 2 | 2 | 2 | 1 | 2 | 1 |

|    |   |   |   |   |   |   |   |   |   |
|----|---|---|---|---|---|---|---|---|---|
| 1  |   |   |   |   |   |   |   |   |   |
| 2  | 2 | 1 | 1 | 2 | 2 | 2 | 1 | 2 | 1 |
| 3  | 2 | 1 | 2 | 2 | 2 | 2 | 2 | 2 | 1 |
| 4  | 2 | 1 | 1 | 2 | 1 | 2 | 1 | 2 | 1 |
| 5  | 2 | 1 | 2 | 2 | 2 | 2 | 1 | 2 | 1 |
| 6  | 2 | 1 | 2 | 1 | 1 | 2 | 1 | 2 | 1 |
| 7  | 2 | 1 | 2 | 1 | 2 | 2 | 2 | 2 | 1 |
| 8  | 2 | 1 | 2 | 2 | 2 | 2 | 2 | 2 | 1 |
| 9  | 1 | 2 | 2 | 2 | 2 | 2 | 2 | 2 | 1 |
| 10 | 2 | 1 | 2 | 2 | 2 | 2 | 2 | 2 | 1 |
| 11 | 2 | 1 | 2 | 2 | 2 | 2 | 2 | 2 | 1 |
| 12 | 2 | 2 | 2 | 1 | 2 | 2 | 1 | 2 | 1 |
| 13 | 2 | 2 | 2 | 1 | 2 | 2 | 2 | 2 | 1 |
| 14 | 2 | 2 | 2 | 2 | 2 | 2 | 2 | 2 | 1 |
| 15 | 2 | 1 | 2 | 2 | 2 | 2 | 1 | 2 | 1 |
| 16 | 2 | 1 | 1 | 2 | 2 | 2 | 2 | 2 | 1 |
| 17 | 2 | 1 | 1 | 2 | 2 | 2 | 2 | 2 | 1 |
| 18 | 2 | 1 | 1 | 2 | 2 | 2 | 2 | 2 | 1 |
| 19 | 2 | 1 | 1 | 2 | 2 | 2 | 2 | 2 | 1 |
| 20 | 2 | 1 | 1 | 2 | 2 | 1 | 2 | 2 | 2 |
| 21 | 2 | 1 | 1 | 2 | 2 | 2 | 2 | 2 | 1 |
| 22 | 2 | 1 | 1 | 1 | 2 | 2 | 1 | 2 | 1 |
| 23 | 2 | 2 | 2 | 2 | 2 | 2 | 2 | 2 | 1 |
| 24 | 2 | 2 | 2 | 2 | 2 | 2 | 2 | 2 | 1 |
| 25 | 1 | 2 | 2 | 2 | 2 | 2 | 1 | 2 | 1 |
| 26 | 2 | 1 | 1 | 1 | 2 | 1 | 2 | 2 | 1 |
| 27 | 2 | 1 | 1 | 2 | 2 | 2 | 1 | 2 | 1 |
| 28 | 2 | 2 | 1 | 1 | 2 | 2 | 2 | 2 | 1 |
| 29 | 2 | 1 | 2 | 2 | 2 | 2 | 1 | 2 | 1 |
| 30 | 2 | 1 | 1 | 1 | 2 | 2 | 2 | 2 | 2 |
| 31 | 2 | 1 | 2 | 2 | 2 | 2 | 1 | 2 | 1 |
| 32 | 2 | 1 | 2 | 1 | 2 | 2 | 2 | 2 | 2 |
| 33 | 2 | 1 | 2 | 1 | 2 | 2 | 2 | 2 | 2 |
| 34 | 2 | 1 | 1 | 1 | 2 | 2 | 2 | 2 | 1 |
| 35 | 2 | 1 | 2 | 1 | 2 | 2 | 2 | 2 | 1 |
| 36 | 2 | 1 | 2 | 2 | 2 | 2 | 2 | 2 | 1 |
| 37 | 2 | 1 | 2 | 2 | 2 | 2 | 2 | 2 | 1 |
| 38 | 2 | 1 | 2 | 1 | 2 | 2 | 2 | 2 | 1 |
| 39 | 1 | 2 | 2 | 2 | 2 | 2 | 1 | 2 | 1 |
| 40 | 2 | 1 | 2 | 1 | 2 | 2 | 2 | 2 | 1 |
| 41 | 2 | 1 | 2 | 2 | 1 | 2 | 2 | 2 | 1 |
| 42 | 2 | 1 | 2 | 1 | 1 | 1 | 2 | 2 | 2 |
| 43 | 2 | 2 | 2 | 2 | 2 | 2 | 1 | 2 | 2 |
| 44 | 2 | 1 | 2 | 1 | 2 | 1 | 1 | 2 | 1 |
| 45 | 2 | 2 | 2 | 2 | 2 | 2 | 2 | 2 | 1 |
| 46 | 2 | 2 | 2 | 2 | 2 | 2 | 2 | 2 | 1 |
| 47 | 2 | 1 | 2 | 2 | 2 | 2 | 1 | 2 | 1 |
| 48 | 2 | 1 | 2 | 1 | 2 | 2 | 2 | 2 | 2 |
| 49 | 2 | 1 | 2 | 2 | 2 | 2 | 2 | 2 | 1 |
| 50 | 2 | 1 | 2 | 2 | 2 | 2 | 2 | 2 | 1 |
| 51 | 2 | 1 | 1 | 1 | 2 | 2 | 1 | 2 | 1 |
| 52 | 2 | 1 | 1 | 2 | 2 | 2 | 1 | 2 | 1 |
| 53 | 2 | 1 | 2 | 2 | 2 | 2 | 1 | 2 | 2 |
| 54 | 2 | 1 | 2 | 2 | 2 | 2 | 2 | 2 | 2 |
| 55 | 2 | 1 | 2 | 2 | 2 | 2 | 2 | 2 | 2 |
| 56 | 2 | 1 | 1 | 2 | 2 | 2 | 2 | 2 | 1 |
| 57 | 2 | 2 | 1 | 2 | 2 | 2 | 2 | 2 | 2 |
| 58 | 2 | 1 | 1 | 1 | 2 | 2 | 1 | 2 | 1 |
| 59 | 2 | 1 | 1 | 1 | 2 | 2 | 2 | 2 | 1 |
| 60 | 2 | 1 | 1 | 2 | 2 | 2 | 1 | 2 | 1 |

|    |   |   |   |   |   |   |   |   |   |
|----|---|---|---|---|---|---|---|---|---|
| 1  |   |   |   |   |   |   |   |   |   |
| 2  | 2 | 2 | 2 | 2 | 2 | 2 | 2 | 2 | 1 |
| 3  | 2 | 1 | 2 | 2 | 2 | 2 | 1 | 2 | 1 |
| 4  | 2 | 2 | 2 | 2 | 2 | 2 | 2 | 2 | 1 |
| 5  | 2 | 1 | 2 | 2 | 2 | 2 | 2 | 2 | 2 |
| 6  |   |   |   |   |   |   |   |   |   |
| 7  | 1 | 1 | 2 | 2 | 2 | 2 | 1 | 2 | 2 |
| 8  | 2 | 2 | 2 | 2 | 2 | 2 | 2 | 2 | 2 |
| 9  | 2 | 1 | 2 | 1 | 2 | 2 | 2 | 2 | 1 |
| 10 | 2 | 1 | 2 | 2 | 2 | 2 | 1 | 2 | 2 |
| 11 | 2 | 1 | 2 | 1 | 2 | 2 | 2 | 2 | 2 |
| 12 |   |   |   |   |   |   |   |   |   |
| 13 | 2 | 1 | 2 | 2 | 2 | 2 | 1 | 2 | 1 |
| 14 | 2 | 1 | 1 | 2 | 2 | 2 | 1 | 2 | 1 |
| 15 | 2 | 1 | 2 | 2 | 2 | 1 | 2 | 2 | 1 |
| 16 | 2 | 1 | 2 | 2 | 2 | 2 | 1 | 2 | 1 |
| 17 | 2 | 2 | 1 | 2 | 2 | 2 | 2 | 2 | 1 |
| 18 | 2 | 2 | 2 | 2 | 2 | 2 | 2 | 2 | 1 |
| 19 |   |   |   |   |   |   |   |   |   |
| 20 | 2 | 1 | 1 | 2 | 2 | 2 | 2 | 2 | 1 |
| 21 | 2 | 1 | 2 | 1 | 1 | 2 | 2 | 2 | 2 |
| 22 | 2 | 1 | 2 | 2 | 2 | 1 | 2 | 2 | 1 |
| 23 |   |   |   |   |   |   |   |   |   |
| 24 | 1 | 1 | 2 | 2 | 2 | 2 | 1 | 2 | 2 |
| 25 | 2 | 1 | 2 | 1 | 2 | 2 | 2 | 2 | 1 |
| 26 | 2 | 1 | 2 | 2 | 2 | 2 | 1 | 2 | 2 |
| 27 | 1 | 1 | 1 | 2 | 2 | 1 | 1 | 2 | 1 |
| 28 | 2 | 1 | 2 | 2 | 2 | 2 | 1 | 2 | 1 |
| 29 | 2 | 2 | 2 | 1 | 2 | 2 | 2 | 2 | 2 |
| 30 | 2 | 1 | 1 | 2 | 2 | 1 | 1 | 2 | 1 |
| 31 | 2 | 1 | 2 | 2 | 2 | 2 | 2 | 2 | 1 |
| 32 | 2 | 2 | 2 | 2 | 2 | 2 | 1 | 2 | 2 |
| 33 | 1 | 2 | 2 | 2 | 2 | 2 | 2 | 2 | 2 |
| 34 | 2 | 1 | 2 | 2 | 2 | 2 | 2 | 2 | 1 |
| 35 | 2 | 2 | 2 | 2 | 2 | 2 | 1 | 2 | 1 |
| 36 | 2 | 1 | 2 | 2 | 2 | 2 | 2 | 2 | 1 |
| 37 | 2 | 1 | 2 | 2 | 2 | 2 | 2 | 2 | 2 |
| 38 | 2 | 1 | 2 | 2 | 2 | 2 | 2 | 2 | 1 |
| 39 | 2 | 1 | 2 | 2 | 2 | 2 | 2 | 2 | 1 |
| 40 | 2 | 1 | 1 | 2 | 2 | 2 | 2 | 2 | 1 |
| 41 | 2 | 1 | 1 | 2 | 2 | 2 | 1 | 2 | 2 |
| 42 |   |   |   |   |   |   |   |   |   |
| 43 | 1 | 2 | 2 | 1 | 2 | 2 | 2 | 2 | 1 |
| 44 | 2 | 1 | 1 | 2 | 2 | 2 | 2 | 2 | 1 |
| 45 | 2 | 1 | 2 | 1 | 2 | 2 | 2 | 2 | 2 |
| 46 | 1 | 1 | 1 | 2 | 2 | 2 | 2 | 2 | 2 |
| 47 | 1 | 1 | 2 | 2 | 2 | 2 | 1 | 2 | 1 |
| 48 |   |   |   |   |   |   |   |   |   |
| 49 | 2 | 1 | 1 | 2 | 2 | 2 | 2 | 2 | 1 |
| 50 | 2 | 1 | 2 | 2 | 2 | 2 | 2 | 2 | 2 |
| 51 | 2 | 2 | 2 | 1 | 2 | 2 | 1 | 2 | 1 |
| 52 | 2 | 1 | 2 | 1 | 2 | 2 | 1 | 2 | 2 |
| 53 | 2 | 1 | 1 | 2 | 2 | 2 | 2 | 2 | 1 |
| 54 | 2 | 1 | 2 | 2 | 2 | 2 | 2 | 2 | 2 |
| 55 | 2 | 1 | 1 | 1 | 2 | 1 | 2 | 2 | 1 |
| 56 | 2 | 1 | 2 | 1 | 2 | 2 | 2 | 2 | 2 |
| 57 | 2 | 1 | 1 | 2 | 2 | 2 | 2 | 2 | 1 |
| 58 | 2 | 1 | 1 | 2 | 2 | 2 | 2 | 2 | 1 |
| 59 | 2 | 1 | 2 | 1 | 2 | 2 | 2 | 2 | 1 |
| 60 | 2 | 1 | 1 | 2 | 2 | 2 | 2 | 2 | 1 |

1  
2            2            2            2            1            2            1            2            2            1  
3  
4  
5  
6  
7  
8  
9  
10  
11  
12  
13  
14  
15  
16  
17  
18  
19  
20  
21  
22  
23  
24  
25  
26  
27  
28  
29  
30  
31  
32  
33  
34  
35  
36  
37  
38  
39  
40  
41  
42  
43  
44  
45  
46  
47  
48  
49  
50  
51  
52  
53  
54  
55  
56  
57  
58  
59  
60

For peer review only



|    | )_Amputati | HO_FU | IWGDFcat | WGDF_cat_4 |
|----|------------|-------|----------|------------|
| 1  |            |       |          |            |
| 2  |            |       |          |            |
| 3  | 2          | 2     | 21       | 2          |
| 4  | 2          | 2     | 0        | 0          |
| 5  | 2          | 2     | 0        | 0          |
| 6  | 2          | 2     | 21       | 2          |
| 7  | 2          | 2     | 0        | 0          |
| 8  | 2          | 2     | 0        | 0          |
| 9  | 2          | 2     | 0        | 0          |
| 10 | 2          | 2     | 0        | 0          |
| 11 | 1          | 2     | 32       | 4          |
| 12 | 2          | 2     | 0        | 0          |
| 13 | 2          | 2     | 0        | 0          |
| 14 | 2          | 2     | 0        | 0          |
| 15 | 2          | 2     | 1        | 1          |
| 16 | 2          | 2     | 1        | 1          |
| 17 | 2          | 2     | 1        | 1          |
| 18 | 2          | 2     | 0        | 0          |
| 19 | 2          | 2     | 0        | 0          |
| 20 | 2          | 2     | 0        | 0          |
| 21 | 2          | 2     | 0        | 0          |
| 22 | 2          | 1     | 31       | 3          |
| 23 | 2          | 1     | 31       | 3          |
| 24 | 2          | 2     | 0        | 0          |
| 25 | 2          | 2     | 0        | 0          |
| 26 | 1          | 2     | 32       | 4          |
| 27 | 1          | 2     | 32       | 4          |
| 28 | 2          | 2     | 21       | 2          |
| 29 | 2          | 2     | 0        | 0          |
| 30 | 2          | 2     | 0        | 0          |
| 31 | 2          | 2     | 0        | 0          |
| 32 | 2          | 2     | 1        | 1          |
| 33 | 2          | 2     | 0        | 0          |
| 34 | 2          | 2     | 0        | 0          |
| 35 | 2          | 2     | 0        | 0          |
| 36 | 2          | 2     | 0        | 0          |
| 37 | 2          | 2     | 0        | 0          |
| 38 | 2          | 2     | 0        | 0          |
| 39 | 2          | 2     | 0        | 0          |
| 40 | 2          | 1     | 31       | 3          |
| 41 | 2          | 2     | 0        | 0          |
| 42 | 2          | 2     | 21       | 2          |
| 43 | 2          | 2     | 0        | 0          |
| 44 | 2          | 1     | 31       | 3          |
| 45 | 2          | 2     | 0        | 0          |
| 46 | 2          | 2     | 0        | 0          |
| 47 | 2          | 2     | 21       | 2          |
| 48 | 2          | 1     | 31       | 3          |
| 49 | 2          | 2     | 0        | 0          |
| 50 | 2          | 2     | 0        | 0          |
| 51 | 2          | 2     | 0        | 0          |
| 52 | 2          | 2     | 0        | 0          |
| 53 | 2          | 1     | 31       | 3          |
| 54 | 2          | 1     | 31       | 3          |
| 55 | 2          | 2     | 0        | 0          |
| 56 | 2          | 2     | 0        | 0          |
| 57 | 1          | 2     | 32       | 4          |
| 58 | 2          | 2     | 0        | 0          |
| 59 | 1          | 2     | 32       | 4          |
| 60 | 1          | 2     | 32       | 4          |

|    |   |   |    |   |
|----|---|---|----|---|
| 1  |   |   |    |   |
| 2  | 2 | 2 | 0  | 0 |
| 3  | 2 | 2 | 0  | 0 |
| 4  | 2 | 2 | 0  | 0 |
| 5  | 2 | 2 | 1  | 1 |
| 6  | 2 | 2 | 0  | 0 |
| 7  | 2 | 2 | 0  | 0 |
| 8  | 2 | 2 | 0  | 0 |
| 9  | 1 | 2 | 32 | 4 |
| 10 | 2 | 2 | 21 | 2 |
| 11 | 2 | 2 | 0  | 0 |
| 12 | 2 | 1 | 31 | 3 |
| 13 | 2 | 2 | 0  | 0 |
| 14 | 2 | 2 | 0  | 0 |
| 15 | 1 | 2 | 32 | 4 |
| 16 | 2 | 2 | 0  | 0 |
| 17 | 2 | 2 | 0  | 0 |
| 18 | 1 | 2 | 32 | 4 |
| 19 | 1 | 1 | 32 | 4 |
| 20 | 1 | 1 | 32 | 4 |
| 21 | 2 | 2 | 0  | 0 |
| 22 | 2 | 2 | 0  | 0 |
| 23 | 1 | 2 | 32 | 4 |
| 24 | 2 | 2 | 1  | 1 |
| 25 | 2 | 2 | 0  | 0 |
| 26 | 2 | 2 | 0  | 0 |
| 27 | 1 | 2 | 32 | 4 |
| 28 | 2 | 2 | 0  | 0 |
| 29 | 2 | 2 | 0  | 0 |
| 30 | 2 | 2 | 1  | 1 |
| 31 | 2 | 2 | 0  | 0 |
| 32 | 2 | 2 | 0  | 0 |
| 33 | 2 | 2 | 0  | 0 |
| 34 | 2 | 2 | 0  | 0 |
| 35 | 2 | 2 | 1  | 1 |
| 36 | 2 | 2 | 0  | 0 |
| 37 | 2 | 2 | 0  | 0 |
| 38 | 2 | 2 | 0  | 0 |
| 39 | 2 | 2 | 1  | 1 |
| 40 | 2 | 1 | 31 | 3 |
| 41 | 2 | 2 | 0  | 0 |
| 42 | 2 | 2 | 0  | 0 |
| 43 | 2 | 2 | 0  | 0 |
| 44 | 2 | 2 | 0  | 0 |
| 45 | 1 | 2 | 32 | 4 |
| 46 | 2 | 1 | 31 | 3 |
| 47 | 2 | 2 | 0  | 0 |
| 48 | 2 | 2 | 0  | 0 |
| 49 | 2 | 2 | 0  | 0 |
| 50 | 2 | 2 | 0  | 0 |
| 51 | 2 | 2 | 0  | 0 |
| 52 | 2 | 1 | 31 | 3 |
| 53 | 2 | 2 | 21 | 2 |
| 54 | 2 | 1 | 31 | 3 |
| 55 | 2 | 2 | 0  | 0 |
| 56 | 2 | 2 | 0  | 0 |
| 57 | 2 | 2 | 1  | 1 |
| 58 | 2 | 2 | 0  | 0 |
| 59 | 2 | 2 | 0  | 0 |
| 60 | 2 | 2 | 0  | 0 |

|    |   |   |    |   |
|----|---|---|----|---|
| 1  |   |   |    |   |
| 2  | 2 | 2 | 0  | 0 |
| 3  | 2 | 2 | 0  | 0 |
| 4  | 2 | 2 | 1  | 1 |
| 5  | 2 | 2 | 0  | 0 |
| 6  |   |   |    |   |
| 7  | 2 | 2 | 0  | 0 |
| 8  | 1 | 2 | 32 | 4 |
| 9  | 2 | 2 | 0  | 0 |
| 10 | 2 | 2 | 0  | 0 |
| 11 | 2 | 2 | 21 | 2 |
| 12 | 2 | 2 | 0  | 0 |
| 13 | 2 | 2 | 0  | 0 |
| 14 | 2 | 2 | 0  | 0 |
| 15 | 2 | 2 | 0  | 0 |
| 16 | 2 | 2 | 21 | 2 |
| 17 | 2 | 2 | 21 | 2 |
| 18 | 2 | 2 | 1  | 1 |
| 19 | 2 | 2 | 0  | 0 |
| 20 | 2 | 2 | 0  | 0 |
| 21 | 2 | 2 | 0  | 0 |
| 22 | 2 | 2 | 0  | 0 |
| 23 | 2 | 2 | 0  | 0 |
| 24 | 2 | 2 | 0  | 0 |
| 25 | 2 | 2 | 0  | 0 |
| 26 | 1 | 2 | 32 | 4 |
| 27 | 1 | 1 | 32 | 4 |
| 28 | 2 | 2 | 0  | 0 |
| 29 | 2 | 2 | 0  | 0 |
| 30 | 2 | 2 | 0  | 0 |
| 31 | 2 | 2 | 0  | 0 |
| 32 | 2 | 2 | 0  | 0 |
| 33 | 2 | 2 | 0  | 0 |
| 34 | 2 | 2 | 21 | 2 |
| 35 | 2 | 2 | 1  | 1 |
| 36 | 2 | 2 | 0  | 0 |
| 37 | 2 | 2 | 0  | 0 |
| 38 | 2 | 2 | 0  | 0 |
| 39 | 2 | 2 | 0  | 0 |
| 40 | 1 | 2 | 32 | 4 |
| 41 | 2 | 2 | 0  | 0 |
| 42 | 2 | 1 | 31 | 3 |
| 43 | 2 | 2 | 21 | 2 |
| 44 | 1 | 2 | 32 | 4 |
| 45 | 2 | 2 | 1  | 1 |
| 46 | 2 | 2 | 0  | 0 |
| 47 | 2 | 2 | 0  | 0 |
| 48 | 2 | 2 | 0  | 0 |
| 49 | 2 | 2 | 0  | 0 |
| 50 | 2 | 2 | 0  | 0 |
| 51 | 2 | 2 | 0  | 0 |
| 52 | 2 | 1 | 31 | 3 |
| 53 | 2 | 2 | 0  | 0 |
| 54 | 2 | 2 | 1  | 1 |
| 55 | 2 | 2 | 0  | 0 |
| 56 | 1 | 1 | 32 | 4 |
| 57 | 1 | 2 | 32 | 4 |
| 58 | 1 | 2 | 32 | 4 |
| 59 | 1 | 2 | 32 | 4 |
| 60 | 2 | 2 | 0  | 0 |

|    |   |   |    |   |
|----|---|---|----|---|
| 1  |   |   |    |   |
| 2  | 2 | 2 | 0  | 0 |
| 3  | 2 | 1 | 31 | 3 |
| 4  | 1 | 2 | 32 | 4 |
| 5  | 2 | 1 | 31 | 3 |
| 6  | 2 | 2 | 21 | 2 |
| 7  | 2 | 1 | 31 | 3 |
| 8  | 2 | 2 | 21 | 2 |
| 9  | 2 | 2 | 21 | 2 |
| 10 | 2 | 2 | 21 | 2 |
| 11 | 1 | 1 | 32 | 4 |
| 12 | 2 | 1 | 31 | 3 |
| 13 | 2 | 2 | 21 | 2 |
| 14 | 2 | 2 | 0  | 0 |
| 15 | 2 | 1 | 31 | 3 |
| 16 | 2 | 2 | 0  | 0 |
| 17 | 2 | 2 | 0  | 0 |
| 18 | 2 | 2 | 0  | 0 |
| 19 | 2 | 2 | 0  | 0 |
| 20 | 2 | 2 | 0  | 0 |
| 21 | 1 | 2 | 32 | 4 |
| 22 | 2 | 2 | 21 | 2 |
| 23 | 2 | 2 | 0  | 0 |
| 24 | 2 | 2 | 21 | 2 |
| 25 | 2 | 2 | 0  | 0 |
| 26 | 2 | 2 | 0  | 0 |
| 27 | 2 | 2 | 0  | 0 |
| 28 | 2 | 1 | 31 | 3 |
| 29 | 1 | 1 | 32 | 4 |
| 30 | 2 | 2 | 0  | 0 |
| 31 | 2 | 2 | 21 | 2 |
| 32 | 2 | 2 | 0  | 0 |
| 33 | 2 | 2 | 0  | 0 |
| 34 | 2 | 2 | 0  | 0 |
| 35 | 2 | 2 | 0  | 0 |
| 36 | 2 | 2 | 0  | 0 |
| 37 | 2 | 2 | 0  | 0 |
| 38 | 2 | 2 | 0  | 0 |
| 39 | 2 | 2 | 0  | 0 |
| 40 | 1 | 1 | 32 | 4 |
| 41 | 2 | 1 | 31 | 3 |
| 42 | 2 | 2 | 21 | 2 |
| 43 | 2 | 2 | 0  | 0 |
| 44 | 1 | 2 | 32 | 4 |
| 45 | 2 | 2 | 0  | 0 |
| 46 | 2 | 2 | 1  | 1 |
| 47 | 2 | 2 | 0  | 0 |
| 48 | 2 | 2 | 0  | 0 |
| 49 | 2 | 2 | 21 | 2 |
| 50 | 2 | 2 | 0  | 0 |
| 51 | 2 | 2 | 0  | 0 |
| 52 | 2 | 2 | 0  | 0 |
| 53 | 2 | 2 | 0  | 0 |
| 54 | 2 | 2 | 0  | 0 |
| 55 | 2 | 2 | 0  | 0 |
| 56 | 2 | 2 | 0  | 0 |
| 57 | 2 | 2 | 0  | 0 |
| 58 | 2 | 2 | 0  | 0 |
| 59 | 2 | 2 | 0  | 0 |
| 60 | 1 | 2 | 32 | 4 |

|    |   |   |    |   |
|----|---|---|----|---|
| 1  |   |   |    |   |
| 2  | 2 | 2 | 21 | 2 |
| 3  | 2 | 2 | 0  | 0 |
| 4  | 2 | 1 | 31 | 3 |
| 5  | 2 | 2 | 0  | 0 |
| 6  |   |   |    |   |
| 7  | 1 | 1 | 32 | 4 |
| 8  | 2 | 2 | 0  | 0 |
| 9  | 2 | 2 | 0  | 0 |
| 10 | 1 | 2 | 32 | 4 |
| 11 | 2 | 2 | 0  | 0 |
| 12 | 2 | 1 | 31 | 3 |
| 13 | 2 | 1 | 31 | 3 |
| 14 | 2 | 2 | 0  | 0 |
| 15 | 2 | 1 | 31 | 3 |
| 16 | 2 | 2 | 21 | 2 |
| 17 | 2 | 2 | 0  | 0 |
| 18 | 2 | 2 | 1  | 1 |
| 19 | 2 | 2 | 0  | 0 |
| 20 | 2 | 2 | 1  | 1 |
| 21 | 2 | 2 | 0  | 0 |
| 22 | 2 | 2 | 21 | 2 |
| 23 | 2 | 2 | 0  | 0 |
| 24 | 2 | 2 | 0  | 0 |
| 25 | 2 | 2 | 0  | 0 |
| 26 | 2 | 2 | 0  | 0 |
| 27 | 2 | 2 | 0  | 0 |
| 28 | 2 | 2 | 1  | 1 |
| 29 | 2 | 2 | 21 | 2 |
| 30 | 2 | 2 | 0  | 0 |
| 31 | 2 | 2 | 0  | 0 |
| 32 | 2 | 2 | 0  | 0 |
| 33 | 2 | 2 | 21 | 2 |
| 34 | 2 | 2 | 21 | 2 |
| 35 | 2 | 2 | 0  | 0 |
| 36 | 2 | 2 | 0  | 0 |
| 37 | 2 | 2 | 0  | 0 |
| 38 | 2 | 2 | 0  | 0 |
| 39 | 2 | 2 | 0  | 0 |
| 40 | 2 | 2 | 0  | 0 |
| 41 | 2 | 2 | 0  | 0 |
| 42 | 2 | 2 | 0  | 0 |
| 43 | 2 | 1 | 31 | 3 |
| 44 | 2 | 2 | 0  | 0 |
| 45 | 2 | 2 | 0  | 0 |
| 46 | 2 | 2 | 0  | 0 |
| 47 | 2 | 1 | 31 | 3 |
| 48 |   |   |    |   |
| 49 | 1 | 2 | 32 | 4 |
| 50 | 1 | 2 | 32 | 4 |
| 51 | 2 | 2 | 0  | 0 |
| 52 | 2 | 2 | 0  | 0 |
| 53 | 2 | 2 | 0  | 0 |
| 54 | 2 | 2 | 0  | 0 |
| 55 | 2 | 2 | 0  | 0 |
| 56 | 2 | 2 | 0  | 0 |
| 57 | 2 | 2 | 0  | 0 |
| 58 | 2 | 2 | 0  | 0 |
| 59 | 2 | 2 | 0  | 0 |
| 60 | 2 | 2 | 0  | 0 |
|    | 1 | 2 | 32 | 4 |

|    |   |   |    |   |
|----|---|---|----|---|
| 1  |   |   |    |   |
| 2  | 2 | 2 | 0  | 0 |
| 3  | 2 | 1 | 31 | 3 |
| 4  | 2 | 1 | 31 | 3 |
| 5  | 2 | 2 | 0  | 0 |
| 6  | 2 | 1 | 31 | 3 |
| 7  | 2 | 2 | 0  | 0 |
| 8  | 2 | 2 | 21 | 2 |
| 9  | 2 | 2 | 0  | 0 |
| 10 | 2 | 2 | 0  | 0 |
| 11 | 2 | 2 | 0  | 0 |
| 12 | 2 | 2 | 0  | 0 |
| 13 | 2 | 2 | 0  | 0 |
| 14 | 2 | 2 | 0  | 0 |
| 15 | 2 | 1 | 31 | 3 |
| 16 | 2 | 1 | 31 | 3 |
| 17 | 2 | 2 | 21 | 2 |
| 18 | 2 | 1 | 31 | 3 |
| 19 | 2 | 2 | 0  | 0 |
| 20 | 2 | 2 | 0  | 0 |
| 21 | 2 | 2 | 0  | 0 |
| 22 | 2 | 2 | 0  | 0 |
| 23 | 2 | 2 | 21 | 2 |
| 24 | 2 | 2 | 21 | 2 |
| 25 | 2 | 2 | 0  | 0 |
| 26 | 2 | 2 | 0  | 0 |
| 27 | 2 | 1 | 31 | 3 |
| 28 | 2 | 2 | 0  | 0 |
| 29 | 2 | 2 | 0  | 0 |
| 30 | 2 | 1 | 31 | 3 |
| 31 | 2 | 1 | 31 | 3 |
| 32 | 2 | 1 | 31 | 3 |
| 33 | 2 | 1 | 31 | 3 |
| 34 | 2 | 2 | 0  | 0 |
| 35 | 2 | 2 | 0  | 0 |
| 36 | 2 | 2 | 0  | 0 |
| 37 | 2 | 2 | 0  | 0 |
| 38 | 2 | 1 | 31 | 3 |
| 39 | 2 | 1 | 31 | 3 |
| 40 | 2 | 2 | 21 | 2 |
| 41 | 2 | 1 | 31 | 3 |
| 42 | 2 | 2 | 0  | 0 |
| 43 | 2 | 2 | 0  | 0 |
| 44 | 2 | 2 | 0  | 0 |
| 45 | 2 | 1 | 31 | 3 |
| 46 | 2 | 1 | 31 | 3 |
| 47 | 2 | 2 | 0  | 0 |
| 48 | 2 | 1 | 31 | 3 |
| 49 | 2 | 2 | 0  | 0 |
| 50 | 2 | 2 | 0  | 0 |
| 51 | 1 | 1 | 32 | 4 |
| 52 | 2 | 2 | 0  | 0 |
| 53 | 2 | 2 | 0  | 0 |
| 54 | 2 | 2 | 0  | 0 |
| 55 | 1 | 2 | 32 | 4 |
| 56 | 2 | 2 | 0  | 0 |
| 57 | 2 | 1 | 31 | 3 |
| 58 | 2 | 1 | 31 | 3 |
| 59 | 2 | 2 | 0  | 0 |
| 60 | 2 | 1 | 31 | 3 |

|    |   |   |    |   |
|----|---|---|----|---|
| 1  |   |   |    |   |
| 2  | 2 | 2 | 0  | 0 |
| 3  | 2 | 2 | 0  | 0 |
| 4  | 2 | 2 | 0  | 0 |
| 5  | 1 | 2 | 32 | 4 |
| 6  | 2 | 1 | 31 | 3 |
| 7  | 2 | 2 | 0  | 0 |
| 8  | 2 | 2 | 0  | 0 |
| 9  | 1 | 1 | 32 | 4 |
| 10 | 2 | 2 | 21 | 2 |
| 11 | 2 | 2 | 0  | 0 |
| 12 | 2 | 2 | 0  | 0 |
| 13 | 2 | 2 | 0  | 0 |
| 14 | 2 | 2 | 0  | 0 |
| 15 | 2 | 2 | 0  | 0 |
| 16 | 2 | 2 | 0  | 0 |
| 17 | 2 | 1 | 31 | 3 |
| 18 | 1 | 2 | 32 | 4 |
| 19 | 2 | 1 | 31 | 3 |
| 20 | 2 | 2 | 0  | 0 |
| 21 | 2 | 2 | 0  | 0 |
| 22 | 2 | 2 | 0  | 0 |
| 23 | 1 | 1 | 32 | 4 |
| 24 | 2 | 2 | 0  | 0 |
| 25 | 2 | 1 | 31 | 3 |
| 26 | 2 | 2 | 0  | 0 |
| 27 | 1 | 2 | 32 | 4 |
| 28 | 2 | 1 | 31 | 3 |
| 29 | 2 | 2 | 1  | 1 |
| 30 | 2 | 2 | 0  | 0 |
| 31 | 2 | 2 | 21 | 2 |
| 32 | 2 | 2 | 0  | 0 |
| 33 | 2 | 2 | 21 | 2 |
| 34 | 2 | 2 | 0  | 0 |
| 35 | 1 | 2 | 32 | 4 |
| 36 | 2 | 2 | 21 | 2 |
| 37 | 2 | 2 | 21 | 2 |
| 38 | 2 | 2 | 0  | 0 |
| 39 | 1 | 1 | 32 | 4 |
| 40 | 1 | 2 | 32 | 4 |
| 41 | 2 | 1 | 31 | 3 |
| 42 | 2 | 1 | 31 | 3 |
| 43 | 2 | 1 | 31 | 3 |
| 44 | 2 | 2 | 0  | 0 |
| 45 | 2 | 2 | 0  | 0 |
| 46 | 2 | 1 | 31 | 3 |
| 47 | 2 | 2 | 0  | 0 |
| 48 | 2 | 2 | 0  | 0 |
| 49 | 2 | 1 | 31 | 3 |
| 50 | 2 | 2 | 0  | 0 |
| 51 | 2 | 2 | 0  | 0 |
| 52 | 2 | 2 | 21 | 2 |
| 53 | 2 | 2 | 21 | 2 |
| 54 | 2 | 2 | 0  | 0 |
| 55 | 2 | 2 | 0  | 0 |
| 56 | 2 | 2 | 0  | 0 |
| 57 | 2 | 2 | 0  | 0 |
| 58 | 2 | 2 | 1  | 1 |
| 59 | 2 | 2 | 21 | 2 |
| 60 | 2 | 2 | 21 | 2 |

|    |   |   |    |   |
|----|---|---|----|---|
| 1  |   |   |    |   |
| 2  | 2 | 2 | 21 | 2 |
| 3  | 2 | 2 | 0  | 0 |
| 4  | 2 | 2 | 0  | 0 |
| 5  | 2 | 2 | 21 | 2 |
| 6  | 2 | 2 | 0  | 0 |
| 7  | 2 | 2 | 0  | 0 |
| 8  | 2 | 1 | 31 | 3 |
| 9  | 2 | 2 | 0  | 0 |
| 10 | 2 | 1 | 31 | 3 |
| 11 | 2 | 2 | 21 | 2 |
| 12 | 2 | 2 | 0  | 0 |
| 13 | 2 | 2 | 0  | 0 |
| 14 | 2 | 1 | 31 | 3 |
| 15 | 1 | 2 | 32 | 4 |
| 16 | 2 | 2 | 21 | 2 |
| 17 | 2 | 2 | 21 | 2 |
| 18 | 2 | 2 | 0  | 0 |
| 19 | 2 | 2 | 0  | 0 |
| 20 | 2 | 2 | 21 | 2 |
| 21 | 1 | 2 | 32 | 4 |
| 22 | 1 | 2 | 32 | 4 |
| 23 | 2 | 2 | 0  | 0 |
| 24 | 2 | 2 | 21 | 2 |
| 25 | 2 | 2 | 21 | 2 |
| 26 | 2 | 2 | 21 | 2 |
| 27 | 2 | 2 | 0  | 0 |
| 28 | 2 | 2 | 0  | 0 |
| 29 | 2 | 2 | 21 | 2 |
| 30 | 2 | 2 | 21 | 2 |
| 31 | 1 | 2 | 32 | 4 |
| 32 | 2 | 2 | 0  | 0 |
| 33 | 2 | 2 | 21 | 2 |
| 34 | 2 | 2 | 0  | 0 |
| 35 | 2 | 2 | 0  | 0 |
| 36 | 2 | 2 | 0  | 0 |
| 37 | 2 | 2 | 0  | 0 |
| 38 | 2 | 2 | 0  | 0 |
| 39 | 2 | 2 | 1  | 1 |
| 40 | 1 | 2 | 32 | 4 |
| 41 | 2 | 2 | 0  | 0 |
| 42 | 2 | 2 | 0  | 0 |
| 43 | 2 | 2 | 0  | 0 |
| 44 | 2 | 2 | 21 | 2 |
| 45 | 2 | 2 | 0  | 0 |
| 46 | 2 | 2 | 0  | 0 |
| 47 | 2 | 2 | 0  | 0 |
| 48 | 2 | 1 | 31 | 3 |
| 49 | 2 | 2 | 0  | 0 |
| 50 | 2 | 1 | 31 | 3 |
| 51 | 2 | 2 | 0  | 0 |
| 52 | 2 | 2 | 1  | 1 |
| 53 | 2 | 2 | 0  | 0 |
| 54 | 2 | 2 | 0  | 0 |
| 55 | 2 | 2 | 0  | 0 |
| 56 | 1 | 1 | 32 | 4 |
| 57 | 2 | 2 | 0  | 0 |
| 58 | 2 | 2 | 0  | 0 |
| 59 | 2 | 1 | 31 | 3 |
| 60 | 2 | 2 | 0  | 0 |



|    |   |   |    |   |
|----|---|---|----|---|
| 1  |   |   |    |   |
| 2  | 2 | 2 | 0  | 0 |
| 3  | 2 | 2 | 0  | 0 |
| 4  | 2 | 2 | 0  | 0 |
| 5  | 2 | 2 | 0  | 0 |
| 6  | 2 | 2 | 0  | 0 |
| 7  | 2 | 1 | 31 | 3 |
| 8  | 2 | 2 | 0  | 0 |
| 9  | 2 | 2 | 0  | 0 |
| 10 | 2 | 2 | 0  | 0 |
| 11 | 2 | 2 | 0  | 0 |
| 12 | 2 | 2 | 0  | 0 |
| 13 | 2 | 2 | 0  | 0 |
| 14 | 2 | 1 | 31 | 3 |
| 15 | 2 | 2 | 0  | 0 |
| 16 | 2 | 1 | 31 | 3 |
| 17 | 2 | 2 | 0  | 0 |
| 18 | 2 | 2 | 0  | 0 |
| 19 | 2 | 2 | 0  | 0 |
| 20 | 2 | 2 | 0  | 0 |
| 21 | 2 | 2 | 0  | 0 |
| 22 | 2 | 2 | 0  | 0 |
| 23 | 2 | 2 | 0  | 0 |
| 24 | 2 | 1 | 31 | 3 |
| 25 | 1 | 1 | 32 | 4 |
| 26 | 2 | 2 | 0  | 0 |
| 27 | 2 | 2 | 0  | 0 |
| 28 | 2 | 2 | 0  | 0 |
| 29 | 2 | 2 | 0  | 0 |
| 30 | 2 | 1 | 31 | 3 |
| 31 | 2 | 2 | 0  | 0 |
| 32 | 2 | 2 | 0  | 0 |
| 33 | 2 | 1 | 31 | 3 |
| 34 | 2 | 1 | 31 | 3 |
| 35 | 2 | 2 | 0  | 0 |
| 36 | 2 | 2 | 0  | 0 |
| 37 | 2 | 2 | 0  | 0 |
| 38 | 2 | 2 | 0  | 0 |
| 39 | 2 | 2 | 0  | 0 |
| 40 | 2 | 2 | 0  | 0 |
| 41 | 2 | 2 | 0  | 0 |
| 42 | 2 | 2 | 1  | 1 |
| 43 | 2 | 2 | 0  | 0 |
| 44 | 2 | 2 | 0  | 0 |
| 45 | 2 | 2 | 0  | 0 |
| 46 | 2 | 2 | 0  | 0 |
| 47 | 2 | 2 | 0  | 0 |
| 48 | 2 | 2 | 0  | 0 |
| 49 | 2 | 2 | 0  | 0 |
| 50 | 2 | 2 | 0  | 0 |
| 51 | 2 | 2 | 0  | 0 |
| 52 | 2 | 2 | 0  | 0 |
| 53 | 2 | 2 | 0  | 0 |
| 54 | 2 | 1 | 31 | 3 |
| 55 | 2 | 2 | 0  | 0 |
| 56 | 2 | 2 | 0  | 0 |
| 57 | 2 | 1 | 31 | 3 |
| 58 | 2 | 1 | 31 | 3 |
| 59 | 2 | 2 | 0  | 0 |
| 60 | 2 | 2 | 0  | 0 |

|    |   |   |    |   |
|----|---|---|----|---|
| 1  |   |   |    |   |
| 2  | 2 | 2 | 0  | 0 |
| 3  | 2 | 2 | 0  | 0 |
| 4  | 2 | 2 | 0  | 0 |
| 5  | 2 | 1 | 31 | 3 |
| 6  | 2 | 1 | 31 | 3 |
| 7  | 2 | 2 | 0  | 0 |
| 8  | 2 | 2 | 0  | 0 |
| 9  | 2 | 2 | 0  | 0 |
| 10 | 2 | 2 | 0  | 0 |
| 11 | 2 | 2 | 0  | 0 |
| 12 | 1 | 2 | 32 | 4 |
| 13 | 2 | 2 | 0  | 0 |
| 14 | 2 | 2 | 0  | 0 |
| 15 | 2 | 2 | 0  | 0 |
| 16 | 2 | 2 | 0  | 0 |
| 17 | 2 | 2 | 0  | 0 |
| 18 | 2 | 2 | 0  | 0 |
| 19 | 2 | 2 | 0  | 0 |
| 20 | 2 | 2 | 0  | 0 |
| 21 | 2 | 2 | 0  | 0 |
| 22 | 2 | 2 | 0  | 0 |
| 23 | 2 | 1 | 31 | 3 |
| 24 | 2 | 2 | 0  | 0 |
| 25 | 2 | 2 | 0  | 0 |
| 26 | 2 | 2 | 0  | 0 |
| 27 | 2 | 1 | 31 | 3 |
| 28 | 2 | 1 | 31 | 3 |
| 29 | 2 | 2 | 0  | 0 |
| 30 | 2 | 2 | 0  | 0 |
| 31 | 2 | 2 | 0  | 0 |
| 32 | 2 | 1 | 31 | 3 |
| 33 | 2 | 2 | 0  | 0 |
| 34 | 2 | 2 | 0  | 0 |
| 35 | 2 | 2 | 0  | 0 |
| 36 | 2 | 2 | 0  | 0 |
| 37 | 1 | 2 | 32 | 4 |
| 38 | 2 | 2 | 0  | 0 |
| 39 | 2 | 2 | 0  | 0 |
| 40 | 2 | 2 | 0  | 0 |
| 41 | 2 | 2 | 0  | 0 |
| 42 | 2 | 2 | 0  | 0 |
| 43 | 2 | 1 | 31 | 3 |
| 44 | 2 | 2 | 0  | 0 |
| 45 | 2 | 2 | 0  | 0 |
| 46 | 2 | 2 | 21 | 2 |
| 47 | 2 | 2 | 0  | 0 |
| 48 | 2 | 2 | 21 | 2 |
| 49 | 2 | 2 | 21 | 2 |
| 50 | 2 | 1 | 31 | 3 |
| 51 | 2 | 1 | 31 | 3 |
| 52 | 2 | 2 | 0  | 0 |
| 53 | 2 | 1 | 31 | 3 |
| 54 | 2 | 1 | 31 | 3 |
| 55 | 2 | 1 | 31 | 3 |
| 56 | 2 | 1 | 31 | 3 |
| 57 | 2 | 2 | 21 | 2 |
| 58 | 2 | 2 | 0  | 0 |
| 59 | 2 | 1 | 31 | 3 |
| 60 | 2 | 2 | 0  | 0 |

|    |   |   |    |   |
|----|---|---|----|---|
| 1  |   |   |    |   |
| 2  | 2 | 2 | 0  | 0 |
| 3  | 2 | 1 | 31 | 3 |
| 4  | 2 | 1 | 31 | 3 |
| 5  | 2 | 1 | 31 | 3 |
| 6  | 2 | 2 | 0  | 0 |
| 7  | 2 | 2 | 0  | 0 |
| 8  | 2 | 2 | 0  | 0 |
| 9  | 2 | 2 | 0  | 0 |
| 10 | 2 | 1 | 31 | 3 |
| 11 | 2 | 2 | 0  | 0 |
| 12 | 2 | 2 | 0  | 0 |
| 13 | 2 | 2 | 0  | 0 |
| 14 | 1 | 2 | 32 | 4 |
| 15 | 2 | 2 | 0  | 0 |
| 16 | 2 | 2 | 1  | 1 |
| 17 | 2 | 2 | 0  | 0 |
| 18 | 2 | 2 | 0  | 0 |
| 19 | 2 | 2 | 0  | 0 |
| 20 | 2 | 2 | 0  | 0 |
| 21 | 2 | 2 | 0  | 0 |
| 22 | 2 | 2 | 0  | 0 |
| 23 | 1 | 2 | 32 | 4 |
| 24 | 2 | 2 | 0  | 0 |
| 25 | 2 | 1 | 31 | 3 |
| 26 | 2 | 1 | 31 | 3 |
| 27 | 2 | 2 | 21 | 2 |
| 28 | 2 | 2 | 0  | 0 |
| 29 | 2 | 2 | 0  | 0 |
| 30 | 2 | 2 | 0  | 0 |
| 31 | 2 | 1 | 31 | 3 |
| 32 | 2 | 2 | 0  | 0 |
| 33 | 2 | 1 | 31 | 3 |
| 34 | 2 | 2 | 1  | 1 |
| 35 | 2 | 2 | 0  | 0 |
| 36 | 2 | 2 | 0  | 0 |
| 37 | 2 | 2 | 0  | 0 |
| 38 | 2 | 2 | 0  | 0 |
| 39 | 2 | 2 | 0  | 0 |
| 40 | 2 | 2 | 0  | 0 |
| 41 | 2 | 2 | 0  | 0 |
| 42 | 2 | 2 | 0  | 0 |
| 43 | 1 | 1 | 32 | 4 |
| 44 | 2 | 1 | 31 | 3 |
| 45 | 2 | 1 | 31 | 3 |
| 46 | 2 | 2 | 0  | 0 |
| 47 | 2 | 2 | 0  | 0 |
| 48 | 2 | 2 | 0  | 0 |
| 49 | 2 | 2 | 0  | 0 |
| 50 | 2 | 2 | 0  | 0 |
| 51 | 2 | 2 | 0  | 0 |
| 52 | 2 | 2 | 0  | 0 |
| 53 | 2 | 2 | 0  | 0 |
| 54 | 2 | 2 | 0  | 0 |
| 55 | 2 | 2 | 0  | 0 |
| 56 | 2 | 2 | 0  | 0 |
| 57 | 2 | 2 | 0  | 0 |
| 58 | 2 | 2 | 0  | 0 |
| 59 | 2 | 2 | 0  | 0 |
| 60 | 1 | 1 | 32 | 4 |

|    |   |   |    |   |
|----|---|---|----|---|
| 1  |   |   |    |   |
| 2  | 2 | 2 | 0  | 0 |
| 3  | 2 | 2 | 0  | 0 |
| 4  | 2 | 2 | 1  | 1 |
| 5  | 2 | 1 | 31 | 3 |
| 6  | 2 | 2 | 0  | 0 |
| 7  | 2 | 2 | 0  | 0 |
| 8  | 2 | 2 | 0  | 0 |
| 9  | 2 | 2 | 0  | 0 |
| 10 | 2 | 2 | 0  | 0 |
| 11 | 2 | 2 | 0  | 0 |
| 12 | 2 | 2 | 0  | 0 |
| 13 | 2 | 2 | 0  | 0 |
| 14 | 2 | 2 | 0  | 0 |
| 15 | 2 | 1 | 31 | 3 |
| 16 | 2 | 2 | 1  | 1 |
| 17 | 2 | 2 | 0  | 0 |
| 18 | 2 | 2 | 0  | 0 |
| 19 | 2 | 2 | 0  | 0 |
| 20 | 2 | 2 | 0  | 0 |
| 21 | 2 | 2 | 0  | 0 |
| 22 | 2 | 2 | 0  | 0 |
| 23 | 2 | 2 | 0  | 0 |
| 24 | 2 | 2 | 0  | 0 |
| 25 | 2 | 2 | 0  | 0 |
| 26 | 2 | 2 | 0  | 0 |
| 27 | 2 | 2 | 0  | 0 |
| 28 | 2 | 2 | 0  | 0 |
| 29 | 2 | 2 | 21 | 2 |
| 30 | 2 | 2 | 0  | 0 |
| 31 | 2 | 2 | 0  | 0 |
| 32 | 1 | 2 | 32 | 4 |
| 33 | 2 | 1 | 31 | 3 |
| 34 | 2 | 2 | 0  | 0 |
| 35 | 2 | 2 | 0  | 0 |
| 36 | 2 | 2 | 0  | 0 |
| 37 | 2 | 2 | 0  | 0 |
| 38 | 2 | 2 | 0  | 0 |
| 39 | 2 | 2 | 21 | 2 |
| 40 | 2 | 2 | 1  | 1 |
| 41 | 1 | 2 | 32 | 4 |
| 42 | 2 | 2 | 1  | 1 |
| 43 | 2 | 2 | 0  | 0 |
| 44 | 2 | 2 | 0  | 0 |
| 45 | 2 | 2 | 0  | 0 |
| 46 | 2 | 1 | 31 | 3 |
| 47 | 2 | 2 | 0  | 0 |
| 48 | 2 | 2 | 0  | 0 |
| 49 | 2 | 2 | 0  | 0 |
| 50 | 2 | 2 | 0  | 0 |
| 51 | 2 | 2 | 21 | 2 |
| 52 | 2 | 2 | 0  | 0 |
| 53 | 2 | 2 | 0  | 0 |
| 54 | 2 | 2 | 0  | 0 |
| 55 | 2 | 1 | 31 | 3 |
| 56 | 2 | 2 | 0  | 0 |
| 57 | 2 | 2 | 0  | 0 |
| 58 | 2 | 1 | 31 | 3 |
| 59 | 2 | 2 | 0  | 0 |
| 60 | 2 | 1 | 31 | 3 |

|    |   |   |    |   |
|----|---|---|----|---|
| 1  |   |   |    |   |
| 2  | 2 | 2 | 0  | 0 |
| 3  | 2 | 2 | 0  | 0 |
| 4  | 2 | 2 | 0  | 0 |
| 5  | 2 | 2 | 0  | 0 |
| 6  | 2 | 2 | 0  | 0 |
| 7  | 2 | 2 | 0  | 0 |
| 8  | 2 | 2 | 0  | 0 |
| 9  | 2 | 2 | 0  | 0 |
| 10 | 2 | 1 | 31 | 3 |
| 11 | 2 | 2 | 0  | 0 |
| 12 | 2 | 1 | 31 | 3 |
| 13 | 2 | 2 | 1  | 1 |
| 14 | 2 | 2 | 0  | 0 |
| 15 | 2 | 2 | 0  | 0 |
| 16 | 2 | 1 | 31 | 3 |
| 17 | 2 | 2 | 0  | 0 |
| 18 | 1 | 2 | 32 | 4 |
| 19 | 2 | 1 | 31 | 3 |
| 20 | 2 | 2 | 21 | 2 |
| 21 | 2 | 2 | 0  | 0 |
| 22 | 2 | 2 | 0  | 0 |
| 23 | 2 | 1 | 31 | 3 |
| 24 | 2 | 2 | 0  | 0 |
| 25 | 2 | 2 | 0  | 0 |
| 26 | 2 | 2 | 0  | 0 |
| 27 | 2 | 2 | 21 | 2 |
| 28 | 2 | 2 | 0  | 0 |
| 29 | 2 | 2 | 0  | 0 |
| 30 | 2 | 2 | 0  | 0 |
| 31 | 2 | 2 | 0  | 0 |
| 32 | 2 | 2 | 0  | 0 |
| 33 | 2 | 2 | 0  | 0 |
| 34 | 2 | 1 | 31 | 3 |
| 35 | 2 | 1 | 31 | 3 |
| 36 | 2 | 2 | 0  | 0 |
| 37 | 1 | 2 | 32 | 4 |
| 38 | 2 | 2 | 22 | 2 |
| 39 | 2 | 2 | 0  | 0 |
| 40 | 2 | 2 | 0  | 0 |
| 41 | 2 | 2 | 0  | 0 |
| 42 | 2 | 2 | 0  | 0 |
| 43 | 2 | 2 | 0  | 0 |
| 44 | 2 | 2 | 21 | 2 |
| 45 | 2 | 1 | 31 | 3 |
| 46 | 2 | 2 | 0  | 0 |
| 47 | 2 | 1 | 31 | 3 |
| 48 | 2 | 2 | 0  | 0 |
| 49 | 2 | 1 | 31 | 3 |
| 50 | 2 | 1 | 31 | 3 |
| 51 | 2 | 1 | 31 | 3 |
| 52 | 2 | 2 | 0  | 0 |
| 53 | 2 | 2 | 0  | 0 |
| 54 | 2 | 2 | 0  | 0 |
| 55 | 2 | 2 | 0  | 0 |
| 56 | 2 | 1 | 31 | 3 |
| 57 | 2 | 1 | 31 | 3 |
| 58 | 2 | 1 | 31 | 3 |
| 59 | 2 | 1 | 31 | 3 |
| 60 | 2 | 2 | 21 | 2 |

|    |   |   |    |   |
|----|---|---|----|---|
| 1  |   |   |    |   |
| 2  | 2 | 2 | 0  | 0 |
| 3  | 1 | 2 | 32 | 4 |
| 4  | 2 | 2 | 21 | 2 |
| 5  | 2 | 2 | 0  | 0 |
| 6  | 2 | 1 | 31 | 3 |
| 7  | 2 | 1 | 31 | 3 |
| 8  | 2 | 2 | 0  | 0 |
| 9  | 2 | 2 | 0  | 0 |
| 10 | 2 | 2 | 0  | 0 |
| 11 | 2 | 1 | 31 | 3 |
| 12 | 2 | 2 | 21 | 2 |
| 13 | 2 | 2 | 0  | 0 |
| 14 | 2 | 2 | 0  | 0 |
| 15 | 2 | 2 | 0  | 0 |
| 16 | 2 | 2 | 0  | 0 |
| 17 | 2 | 1 | 31 | 3 |
| 18 | 2 | 2 | 21 | 2 |
| 19 | 2 | 2 | 0  | 0 |
| 20 | 2 | 2 | 0  | 0 |
| 21 | 2 | 2 | 0  | 0 |
| 22 | 2 | 1 | 31 | 3 |
| 23 | 2 | 1 | 31 | 3 |
| 24 | 2 | 2 | 0  | 0 |
| 25 | 2 | 2 | 0  | 0 |
| 26 | 2 | 2 | 0  | 0 |
| 27 | 2 | 1 | 31 | 3 |
| 28 | 2 | 1 | 31 | 3 |
| 29 | 2 | 2 | 21 | 2 |
| 30 | 2 | 1 | 31 | 3 |
| 31 | 2 | 1 | 31 | 3 |
| 32 | 2 | 1 | 31 | 3 |
| 33 | 2 | 2 | 0  | 0 |
| 34 | 2 | 2 | 0  | 0 |
| 35 | 2 | 2 | 0  | 0 |
| 36 | 2 | 2 | 0  | 0 |
| 37 | 2 | 2 | 0  | 0 |
| 38 | 2 | 1 | 31 | 3 |
| 39 | 2 | 1 | 31 | 3 |
| 40 | 2 | 2 | 21 | 2 |
| 41 | 2 | 1 | 31 | 3 |
| 42 | 2 | 2 | 0  | 0 |
| 43 | 2 | 2 | 0  | 0 |
| 44 | 2 | 2 | 0  | 0 |
| 45 | 2 | 1 | 31 | 3 |
| 46 | 2 | 1 | 31 | 3 |
| 47 | 2 | 2 | 21 | 2 |
| 48 | 2 | 2 | 0  | 0 |
| 49 | 2 | 2 | 0  | 0 |
| 50 | 2 | 1 | 31 | 3 |
| 51 | 2 | 2 | 0  | 0 |
| 52 | 2 | 2 | 21 | 2 |
| 53 | 2 | 1 | 31 | 3 |
| 54 | 2 | 1 | 31 | 3 |
| 55 | 2 | 1 | 31 | 3 |
| 56 | 2 | 1 | 31 | 3 |
| 57 | 2 | 1 | 31 | 3 |
| 58 | 2 | 1 | 31 | 3 |
| 59 | 2 | 1 | 31 | 3 |
| 60 | 2 | 2 | 0  | 0 |

|    |   |   |    |   |
|----|---|---|----|---|
| 1  |   |   |    |   |
| 2  | 2 | 2 | 1  | 1 |
| 3  | 2 | 2 | 0  | 0 |
| 4  | 2 | 2 | 0  | 0 |
| 5  | 2 | 1 | 31 | 3 |
| 6  | 2 | 1 | 31 | 3 |
| 7  | 2 | 2 | 0  | 0 |
| 8  | 2 | 2 | 0  | 0 |
| 9  | 1 | 2 | 32 | 4 |
| 10 | 2 | 1 | 31 | 3 |
| 11 | 2 | 2 | 0  | 0 |
| 12 | 1 | 1 | 32 | 4 |
| 13 | 2 | 2 | 0  | 0 |
| 14 | 2 | 2 | 21 | 2 |
| 15 | 2 | 1 | 31 | 3 |
| 16 | 2 | 2 | 0  | 0 |
| 17 | 2 | 2 | 0  | 0 |
| 18 | 2 | 2 | 0  | 0 |
| 19 | 2 | 1 | 31 | 3 |
| 20 | 1 | 1 | 32 | 4 |
| 21 | 2 | 1 | 31 | 3 |
| 22 | 2 | 2 | 0  | 0 |
| 23 | 2 | 2 | 0  | 0 |
| 24 | 1 | 2 | 32 | 4 |
| 25 | 2 | 2 | 0  | 0 |
| 26 | 2 | 2 | 0  | 0 |
| 27 | 2 | 2 | 0  | 0 |
| 28 | 2 | 2 | 21 | 2 |
| 29 | 2 | 2 | 0  | 0 |
| 30 | 2 | 1 | 31 | 3 |
| 31 | 2 | 2 | 0  | 0 |
| 32 | 2 | 1 | 31 | 3 |
| 33 | 2 | 1 | 31 | 3 |
| 34 | 2 | 2 | 0  | 0 |
| 35 | 2 | 2 | 0  | 0 |
| 36 | 2 | 2 | 0  | 0 |
| 37 | 2 | 2 | 0  | 0 |
| 38 | 2 | 2 | 0  | 0 |
| 39 | 2 | 1 | 31 | 3 |
| 40 | 2 | 2 | 0  | 0 |
| 41 | 2 | 2 | 0  | 0 |
| 42 | 2 | 2 | 0  | 0 |
| 43 | 2 | 2 | 0  | 0 |
| 44 | 2 | 2 | 0  | 0 |
| 45 | 2 | 2 | 0  | 0 |
| 46 | 2 | 2 | 0  | 0 |
| 47 | 2 | 2 | 0  | 0 |
| 48 | 2 | 2 | 0  | 0 |
| 49 | 1 | 1 | 32 | 4 |
| 50 | 2 | 1 | 31 | 3 |
| 51 | 2 | 2 | 0  | 0 |
| 52 | 2 | 2 | 0  | 0 |
| 53 | 2 | 2 | 0  | 0 |
| 54 | 2 | 2 | 0  | 0 |
| 55 | 2 | 2 | 0  | 0 |
| 56 | 2 | 1 | 31 | 3 |
| 57 | 2 | 2 | 21 | 2 |
| 58 | 2 | 2 | 0  | 0 |
| 59 | 2 | 2 | 0  | 0 |
| 60 | 2 | 2 | 1  | 1 |

|    |   |   |    |   |
|----|---|---|----|---|
| 1  |   |   |    |   |
| 2  | 2 | 1 | 31 | 3 |
| 3  | 2 | 2 | 0  | 0 |
| 4  | 2 | 1 | 31 | 3 |
| 5  | 2 | 1 | 31 | 3 |
| 6  | 2 | 1 | 31 | 3 |
| 7  | 2 | 1 | 31 | 3 |
| 8  | 2 | 1 | 31 | 3 |
| 9  | 2 | 2 | 0  | 0 |
| 10 | 2 | 1 | 31 | 3 |
| 11 | 2 | 2 | 0  | 0 |
| 12 | 2 | 2 | 0  | 0 |
| 13 | 2 | 2 | 0  | 0 |
| 14 | 2 | 2 | 21 | 2 |
| 15 | 2 | 2 | 0  | 0 |
| 16 | 2 | 1 | 31 | 3 |
| 17 | 2 | 1 | 31 | 3 |
| 18 | 2 | 2 | 0  | 0 |
| 19 | 2 | 2 | 0  | 0 |
| 20 | 2 | 2 | 0  | 0 |
| 21 | 2 | 2 | 0  | 0 |
| 22 | 2 | 2 | 0  | 0 |
| 23 | 1 | 2 | 32 | 4 |
| 24 | 2 | 2 | 0  | 0 |
| 25 | 2 | 2 | 0  | 0 |
| 26 | 2 | 2 | 0  | 0 |
| 27 | 2 | 2 | 0  | 0 |
| 28 | 2 | 2 | 22 | 2 |
| 29 | 1 | 2 | 32 | 4 |
| 30 | 2 | 2 | 0  | 0 |
| 31 | 2 | 1 | 31 | 3 |
| 32 | 1 | 1 | 32 | 4 |
| 33 | 2 | 1 | 31 | 3 |
| 34 | 2 | 2 | 0  | 0 |
| 35 | 2 | 2 | 0  | 0 |
| 36 | 2 | 2 | 0  | 0 |
| 37 | 2 | 1 | 31 | 3 |
| 38 | 2 | 2 | 0  | 0 |
| 39 | 2 | 2 | 0  | 0 |
| 40 | 2 | 2 | 0  | 0 |
| 41 | 2 | 1 | 31 | 3 |
| 42 | 2 | 2 | 0  | 0 |
| 43 | 1 | 2 | 32 | 4 |
| 44 | 2 | 2 | 0  | 0 |
| 45 | 2 | 2 | 21 | 2 |
| 46 | 2 | 2 | 0  | 0 |
| 47 | 2 | 2 | 21 | 2 |
| 48 | 2 | 2 | 21 | 2 |
| 49 | 2 | 2 | 21 | 2 |
| 50 | 2 | 2 | 0  | 0 |
| 51 | 1 | 2 | 32 | 4 |
| 52 | 2 | 2 | 0  | 0 |
| 53 | 2 | 2 | 21 | 2 |
| 54 | 2 | 2 | 0  | 0 |
| 55 | 2 | 1 | 31 | 3 |
| 56 | 2 | 2 | 0  | 0 |
| 57 | 1 | 2 | 32 | 4 |
| 58 | 2 | 2 | 0  | 0 |
| 59 | 2 | 2 | 0  | 0 |
| 60 | 1 | 2 | 32 | 4 |



|    |   |   |    |   |
|----|---|---|----|---|
| 1  |   |   |    |   |
| 2  | 2 | 2 | 21 | 2 |
| 3  | 2 | 2 | 0  | 0 |
| 4  | 2 | 1 | 31 | 3 |
| 5  | 2 | 1 | 31 | 3 |
| 6  | 2 | 1 | 31 | 3 |
| 7  | 2 | 2 | 0  | 0 |
| 8  | 2 | 2 | 0  | 0 |
| 9  | 2 | 2 | 0  | 0 |
| 10 | 2 | 1 | 31 | 3 |
| 11 | 2 | 1 | 31 | 3 |
| 12 | 2 | 2 | 0  | 0 |
| 13 | 2 | 2 | 0  | 0 |
| 14 | 2 | 2 | 0  | 0 |
| 15 | 2 | 1 | 31 | 3 |
| 16 | 2 | 2 | 21 | 2 |
| 17 | 2 | 1 | 31 | 3 |
| 18 | 2 | 2 | 21 | 2 |
| 19 | 2 | 1 | 31 | 3 |
| 20 | 2 | 2 | 21 | 2 |
| 21 | 2 | 2 | 0  | 0 |
| 22 | 2 | 2 | 21 | 2 |
| 23 | 2 | 2 | 21 | 2 |
| 24 | 2 | 1 | 31 | 3 |
| 25 | 2 | 2 | 0  | 0 |
| 26 | 2 | 2 | 0  | 0 |
| 27 | 2 | 1 | 31 | 3 |
| 28 | 2 | 2 | 0  | 0 |
| 29 | 2 | 2 | 0  | 0 |
| 30 | 2 | 2 | 0  | 0 |
| 31 | 2 | 2 | 0  | 0 |
| 32 | 2 | 2 | 0  | 0 |
| 33 | 2 | 1 | 31 | 3 |
| 34 | 2 | 2 | 0  | 0 |
| 35 | 2 | 1 | 31 | 3 |
| 36 | 2 | 2 | 0  | 0 |
| 37 | 2 | 2 | 0  | 0 |
| 38 | 2 | 2 | 0  | 0 |
| 39 | 2 | 2 | 0  | 0 |
| 40 | 2 | 1 | 31 | 3 |
| 41 | 2 | 2 | 0  | 0 |
| 42 | 2 | 2 | 0  | 0 |
| 43 | 2 | 2 | 21 | 2 |
| 44 | 2 | 1 | 31 | 3 |
| 45 | 2 | 2 | 21 | 2 |
| 46 | 2 | 1 | 31 | 3 |
| 47 | 1 | 1 | 32 | 4 |
| 48 | 2 | 2 | 0  | 0 |
| 49 | 1 | 1 | 32 | 4 |
| 50 | 2 | 2 | 0  | 0 |
| 51 | 2 | 2 | 0  | 0 |
| 52 | 1 | 2 | 32 | 4 |
| 53 | 2 | 2 | 21 | 2 |
| 54 | 2 | 1 | 31 | 3 |
| 55 | 2 | 2 | 0  | 0 |
| 56 | 2 | 2 | 0  | 0 |
| 57 | 2 | 2 | 0  | 0 |
| 58 | 2 | 1 | 31 | 3 |
| 59 | 2 | 2 | 0  | 0 |
| 60 | 1 | 2 | 32 | 4 |

|    |   |   |    |   |
|----|---|---|----|---|
| 1  |   |   |    |   |
| 2  | 1 | 1 | 32 | 4 |
| 3  | 2 | 2 | 0  | 0 |
| 4  | 2 | 1 | 31 | 3 |
| 5  | 2 | 2 | 0  | 0 |
| 6  | 2 | 2 | 0  | 0 |
| 7  | 2 | 2 | 0  | 0 |
| 8  | 2 | 2 | 21 | 2 |
| 9  | 2 | 1 | 31 | 3 |
| 10 | 2 | 1 | 31 | 3 |
| 11 | 1 | 2 | 32 | 4 |
| 12 | 2 | 2 | 0  | 0 |
| 13 | 2 | 2 | 0  | 0 |
| 14 | 2 | 2 | 0  | 0 |
| 15 | 2 | 2 | 0  | 0 |
| 16 | 2 | 2 | 0  | 0 |
| 17 | 2 | 2 | 0  | 0 |
| 18 | 2 | 2 | 21 | 2 |
| 19 | 2 | 2 | 21 | 2 |
| 20 | 2 | 1 | 31 | 3 |
| 21 | 1 | 2 | 32 | 4 |
| 22 | 2 | 2 | 0  | 0 |
| 23 | 1 | 2 | 32 | 4 |
| 24 | 2 | 2 | 0  | 0 |
| 25 | 2 | 2 | 0  | 0 |
| 26 | 2 | 2 | 0  | 0 |
| 27 | 2 | 2 | 21 | 2 |
| 28 | 2 | 2 | 0  | 0 |
| 29 | 2 | 1 | 31 | 3 |
| 30 | 2 | 1 | 31 | 3 |
| 31 | 2 | 1 | 31 | 3 |
| 32 | 2 | 1 | 31 | 3 |
| 33 | 2 | 1 | 31 | 3 |
| 34 | 2 | 2 | 0  | 0 |
| 35 | 2 | 2 | 0  | 0 |
| 36 | 2 | 2 | 0  | 0 |
| 37 | 2 | 2 | 0  | 0 |
| 38 | 2 | 1 | 31 | 3 |
| 39 | 2 | 2 | 0  | 0 |
| 40 | 2 | 2 | 0  | 0 |
| 41 | 1 | 2 | 32 | 4 |
| 42 | 2 | 2 | 0  | 0 |
| 43 | 2 | 2 | 0  | 0 |
| 44 | 2 | 2 | 0  | 0 |
| 45 | 2 | 2 | 0  | 0 |
| 46 | 2 | 2 | 0  | 0 |
| 47 | 2 | 2 | 0  | 0 |
| 48 | 2 | 2 | 0  | 0 |
| 49 | 1 | 2 | 32 | 4 |
| 50 | 2 | 2 | 0  | 0 |
| 51 | 2 | 2 | 0  | 0 |
| 52 | 2 | 2 | 0  | 0 |
| 53 | 2 | 2 | 0  | 0 |
| 54 | 2 | 2 | 0  | 0 |
| 55 | 2 | 2 | 0  | 0 |
| 56 | 2 | 2 | 0  | 0 |
| 57 | 2 | 2 | 0  | 0 |
| 58 | 2 | 1 | 31 | 3 |
| 59 | 1 | 1 | 32 | 4 |
| 60 | 2 | 2 | 0  | 0 |

|    |   |   |    |   |
|----|---|---|----|---|
| 1  |   |   |    |   |
| 2  | 2 | 2 | 0  | 0 |
| 3  | 2 | 2 | 0  | 0 |
| 4  | 2 | 1 | 31 | 3 |
| 5  | 2 | 2 | 0  | 0 |
| 6  | 2 | 2 | 0  | 0 |
| 7  | 2 | 2 | 0  | 0 |
| 8  | 2 | 2 | 0  | 0 |
| 9  | 2 | 2 | 1  | 1 |
| 10 | 2 | 2 | 0  | 0 |
| 11 | 2 | 2 | 0  | 0 |
| 12 | 2 | 1 | 31 | 3 |
| 13 | 2 | 2 | 0  | 0 |
| 14 | 2 | 2 | 0  | 0 |
| 15 | 2 | 2 | 0  | 0 |
| 16 | 2 | 1 | 31 | 3 |
| 17 | 2 | 1 | 31 | 3 |
| 18 | 2 | 2 | 0  | 0 |
| 19 | 2 | 1 | 31 | 3 |
| 20 | 2 | 2 | 0  | 0 |
| 21 | 2 | 2 | 0  | 0 |
| 22 | 1 | 2 | 32 | 4 |
| 23 | 2 | 2 | 0  | 0 |
| 24 | 2 | 2 | 21 | 2 |
| 25 | 2 | 2 | 21 | 2 |
| 26 | 2 | 2 | 0  | 0 |
| 27 | 2 | 1 | 31 | 3 |
| 28 | 1 | 2 | 32 | 4 |
| 29 | 2 | 2 | 0  | 0 |
| 30 | 2 | 2 | 0  | 0 |
| 31 | 2 | 2 | 0  | 0 |
| 32 | 2 | 2 | 0  | 0 |
| 33 | 1 | 1 | 32 | 4 |
| 34 | 2 | 1 | 31 | 3 |
| 35 | 2 | 2 | 0  | 0 |
| 36 | 2 | 2 | 0  | 0 |
| 37 | 2 | 2 | 0  | 0 |
| 38 | 2 | 2 | 0  | 0 |
| 39 | 2 | 2 | 0  | 0 |
| 40 | 2 | 2 | 0  | 0 |
| 41 | 2 | 1 | 31 | 3 |
| 42 | 2 | 2 | 0  | 0 |
| 43 | 2 | 2 | 0  | 0 |
| 44 | 2 | 2 | 0  | 0 |
| 45 | 2 | 2 | 21 | 2 |
| 46 | 2 | 2 | 21 | 2 |
| 47 | 2 | 1 | 31 | 3 |
| 48 | 2 | 2 | 0  | 0 |
| 49 | 2 | 2 | 0  | 0 |
| 50 | 2 | 2 | 0  | 0 |
| 51 | 2 | 2 | 0  | 0 |
| 52 | 2 | 2 | 0  | 0 |
| 53 | 2 | 2 | 0  | 0 |
| 54 | 2 | 2 | 0  | 0 |
| 55 | 2 | 2 | 0  | 0 |
| 56 | 2 | 1 | 31 | 3 |
| 57 | 1 | 2 | 32 | 4 |
| 58 | 2 | 2 | 0  | 0 |
| 59 | 2 | 1 | 31 | 3 |
| 60 | 2 | 2 | 0  | 0 |

|    |   |   |    |   |
|----|---|---|----|---|
| 1  |   |   |    |   |
| 2  | 2 | 2 | 0  | 0 |
| 3  | 2 | 2 | 0  | 0 |
| 4  | 2 | 2 | 0  | 0 |
| 5  | 2 | 2 | 0  | 0 |
| 6  | 2 | 2 | 0  | 0 |
| 7  | 2 | 2 | 0  | 0 |
| 8  | 2 | 2 | 0  | 0 |
| 9  | 2 | 2 | 0  | 0 |
| 10 | 2 | 2 | 0  | 0 |
| 11 | 2 | 1 | 31 | 3 |
| 12 | 2 | 1 | 31 | 3 |
| 13 | 2 | 2 | 21 | 2 |
| 14 | 2 | 2 | 0  | 0 |
| 15 | 2 | 2 | 0  | 0 |
| 16 | 2 | 2 | 0  | 0 |
| 17 | 2 | 2 | 0  | 0 |
| 18 | 2 | 2 | 0  | 0 |
| 19 | 2 | 2 | 0  | 0 |
| 20 | 2 | 2 | 0  | 0 |
| 21 | 2 | 1 | 31 | 3 |
| 22 | 2 | 2 | 21 | 2 |
| 23 | 2 | 1 | 31 | 3 |
| 24 | 2 | 1 | 31 | 3 |
| 25 | 2 | 2 | 0  | 0 |
| 26 | 2 | 2 | 0  | 0 |
| 27 | 2 | 2 | 0  | 0 |
| 28 | 2 | 1 | 31 | 3 |
| 29 | 2 | 2 | 0  | 0 |
| 30 | 2 | 2 | 0  | 0 |
| 31 | 2 | 2 | 0  | 0 |
| 32 | 2 | 2 | 0  | 0 |
| 33 | 2 | 2 | 0  | 0 |
| 34 | 2 | 2 | 21 | 2 |
| 35 | 2 | 2 | 21 | 2 |
| 36 | 2 | 2 | 0  | 0 |
| 37 | 2 | 2 | 21 | 2 |
| 38 | 2 | 2 | 0  | 0 |
| 39 | 2 | 2 | 0  | 0 |
| 40 | 2 | 2 | 0  | 0 |
| 41 | 2 | 1 | 31 | 3 |
| 42 | 2 | 2 | 0  | 0 |
| 43 | 2 | 1 | 31 | 3 |
| 44 | 2 | 2 | 0  | 0 |
| 45 | 2 | 1 | 31 | 3 |
| 46 | 2 | 1 | 31 | 3 |
| 47 | 2 | 1 | 31 | 3 |
| 48 | 2 | 1 | 31 | 3 |
| 49 | 2 | 2 | 21 | 2 |
| 50 | 2 | 1 | 31 | 3 |
| 51 | 2 | 2 | 21 | 2 |
| 52 | 2 | 2 | 0  | 0 |
| 53 | 2 | 2 | 21 | 2 |
| 54 | 2 | 2 | 21 | 2 |
| 55 | 2 | 2 | 0  | 0 |
| 56 | 2 | 2 | 21 | 2 |
| 57 | 2 | 2 | 0  | 0 |
| 58 | 2 | 2 | 21 | 2 |
| 59 | 2 | 2 | 0  | 0 |
| 60 | 2 | 2 | 0  | 0 |

|    |   |   |    |   |
|----|---|---|----|---|
| 1  |   |   |    |   |
| 2  | 2 | 1 | 31 | 3 |
| 3  | 2 | 2 | 0  | 0 |
| 4  | 2 | 2 | 0  | 0 |
| 5  | 2 | 2 | 0  | 0 |
| 6  | 2 | 2 | 0  | 0 |
| 7  | 2 | 2 | 0  | 0 |
| 8  | 2 | 2 | 1  | 1 |
| 9  | 2 | 2 | 0  | 0 |
| 10 | 2 | 2 | 0  | 0 |
| 11 | 2 | 2 | 21 | 2 |
| 12 | 1 | 2 | 32 | 4 |
| 13 | 2 | 2 | 0  | 0 |
| 14 | 2 | 2 | 22 | 2 |
| 15 | 2 | 1 | 31 | 3 |
| 16 | 2 | 2 | 0  | 0 |
| 17 | 2 | 2 | 0  | 0 |
| 18 | 1 | 1 | 32 | 4 |
| 19 | 2 | 2 | 1  | 1 |
| 20 | 2 | 2 | 0  | 0 |
| 21 | 2 | 2 | 0  | 0 |
| 22 | 2 | 2 | 0  | 0 |
| 23 | 2 | 2 | 0  | 0 |
| 24 | 2 | 1 | 31 | 3 |
| 25 | 2 | 2 | 0  | 0 |
| 26 | 2 | 2 | 0  | 0 |
| 27 | 2 | 2 | 0  | 0 |
| 28 | 1 | 2 | 32 | 4 |
| 29 | 2 | 2 | 0  | 0 |
| 30 | 2 | 2 | 0  | 0 |
| 31 | 2 | 2 | 0  | 0 |
| 32 | 2 | 2 | 1  | 1 |
| 33 | 2 | 2 | 0  | 0 |
| 34 | 2 | 2 | 0  | 0 |
| 35 | 2 | 2 | 0  | 0 |
| 36 | 2 | 2 | 0  | 0 |
| 37 | 2 | 2 | 0  | 0 |
| 38 | 2 | 2 | 0  | 0 |
| 39 | 2 | 2 | 0  | 0 |
| 40 | 2 | 2 | 1  | 1 |
| 41 | 2 | 2 | 1  | 1 |
| 42 | 2 | 2 | 1  | 1 |
| 43 | 2 | 2 | 0  | 0 |
| 44 | 2 | 2 | 0  | 0 |
| 45 | 2 | 2 | 0  | 0 |
| 46 | 2 | 2 | 0  | 0 |
| 47 | 2 | 2 | 1  | 1 |
| 48 | 2 | 1 | 31 | 3 |
| 49 | 2 | 2 | 0  | 0 |
| 50 | 2 | 2 | 1  | 1 |
| 51 | 2 | 2 | 21 | 2 |
| 52 | 2 | 1 | 31 | 3 |
| 53 | 2 | 2 | 0  | 0 |
| 54 | 2 | 2 | 0  | 0 |
| 55 | 2 | 2 | 0  | 0 |
| 56 | 2 | 2 | 0  | 0 |
| 57 | 2 | 2 | 0  | 0 |
| 58 | 2 | 2 | 21 | 2 |
| 59 | 2 | 1 | 31 | 3 |
| 60 | 2 | 2 | 0  | 0 |

|    |   |   |    |   |
|----|---|---|----|---|
| 1  |   |   |    |   |
| 2  | 2 | 2 | 21 | 2 |
| 3  | 2 | 2 | 0  | 0 |
| 4  | 2 | 2 | 0  | 0 |
| 5  | 2 | 2 | 0  | 0 |
| 6  | 2 | 2 | 1  | 1 |
| 7  | 2 | 1 | 31 | 3 |
| 8  | 2 | 2 | 0  | 0 |
| 9  | 2 | 2 | 0  | 0 |
| 10 | 2 | 2 | 0  | 0 |
| 11 | 1 | 2 | 32 | 4 |
| 12 | 2 | 1 | 31 | 3 |
| 13 | 2 | 2 | 0  | 0 |
| 14 | 2 | 2 | 0  | 0 |
| 15 | 2 | 2 | 0  | 0 |
| 16 | 2 | 2 | 0  | 0 |
| 17 | 2 | 2 | 21 | 2 |
| 18 | 2 | 2 | 0  | 0 |
| 19 | 2 | 2 | 0  | 0 |
| 20 | 2 | 2 | 0  | 0 |
| 21 | 2 | 2 | 0  | 0 |
| 22 | 1 | 2 | 32 | 4 |
| 23 | 2 | 1 | 31 | 3 |
| 24 | 2 | 2 | 21 | 2 |
| 25 | 2 | 2 | 1  | 1 |
| 26 | 2 | 2 | 0  | 0 |
| 27 | 2 | 2 | 0  | 0 |
| 28 | 2 | 2 | 0  | 0 |
| 29 | 2 | 2 | 0  | 0 |
| 30 | 2 | 2 | 21 | 2 |
| 31 | 2 | 2 | 1  | 1 |
| 32 | 2 | 2 | 0  | 0 |
| 33 | 2 | 2 | 21 | 2 |
| 34 | 2 | 2 | 0  | 0 |
| 35 | 2 | 2 | 0  | 0 |
| 36 | 2 | 2 | 0  | 0 |
| 37 | 1 | 2 | 32 | 4 |
| 38 | 2 | 2 | 0  | 0 |
| 39 | 2 | 2 | 21 | 2 |
| 40 | 2 | 2 | 21 | 2 |
| 41 | 2 | 1 | 31 | 3 |
| 42 | 2 | 2 | 0  | 0 |
| 43 | 2 | 2 | 0  | 0 |
| 44 | 2 | 1 | 31 | 3 |
| 45 | 2 | 2 | 0  | 0 |
| 46 | 2 | 2 | 21 | 2 |
| 47 | 2 | 2 | 0  | 0 |
| 48 | 2 | 2 | 0  | 0 |
| 49 | 2 | 1 | 31 | 3 |
| 50 | 2 | 2 | 21 | 2 |
| 51 | 2 | 2 | 0  | 0 |
| 52 | 2 | 2 | 0  | 0 |
| 53 | 2 | 2 | 0  | 0 |
| 54 | 2 | 2 | 21 | 2 |
| 55 | 2 | 2 | 0  | 0 |
| 56 | 2 | 2 | 0  | 0 |
| 57 | 2 | 2 | 0  | 0 |
| 58 | 2 | 2 | 0  | 0 |
| 59 | 2 | 1 | 31 | 3 |
| 60 | 2 | 1 | 31 | 3 |

|    |   |   |    |   |
|----|---|---|----|---|
| 1  |   |   |    |   |
| 2  | 2 | 2 | 21 | 2 |
| 3  | 2 | 2 | 0  | 0 |
| 4  | 2 | 2 | 21 | 2 |
| 5  | 2 | 2 | 21 | 2 |
| 6  | 2 | 2 | 21 | 2 |
| 7  | 2 | 2 | 0  | 0 |
| 8  | 2 | 2 | 0  | 0 |
| 9  | 2 | 1 | 31 | 3 |
| 10 | 2 | 2 | 0  | 0 |
| 11 | 1 | 2 | 32 | 4 |
| 12 | 2 | 1 | 31 | 3 |
| 13 | 2 | 2 | 0  | 0 |
| 14 | 2 | 2 | 21 | 2 |
| 15 | 2 | 2 | 0  | 0 |
| 16 | 2 | 2 | 0  | 0 |
| 17 | 2 | 2 | 0  | 0 |
| 18 | 2 | 2 | 0  | 0 |
| 19 | 2 | 2 | 0  | 0 |
| 20 | 2 | 2 | 0  | 0 |
| 21 | 2 | 2 | 0  | 0 |
| 22 | 2 | 2 | 21 | 2 |
| 23 | 2 | 1 | 31 | 3 |
| 24 | 2 | 2 | 21 | 2 |
| 25 | 2 | 1 | 31 | 3 |
| 26 | 2 | 2 | 21 | 2 |
| 27 | 2 | 1 | 31 | 3 |
| 28 | 2 | 2 | 21 | 2 |
| 29 | 2 | 2 | 0  | 0 |
| 30 | 2 | 2 | 0  | 0 |
| 31 | 2 | 1 | 31 | 3 |
| 32 | 2 | 2 | 0  | 0 |
| 33 | 2 | 2 | 0  | 0 |
| 34 | 2 | 2 | 0  | 0 |
| 35 | 2 | 2 | 0  | 0 |
| 36 | 2 | 2 | 0  | 0 |
| 37 | 2 | 2 | 0  | 0 |
| 38 | 2 | 2 | 0  | 0 |
| 39 | 2 | 2 | 21 | 2 |
| 40 | 2 | 2 | 0  | 0 |
| 41 | 2 | 2 | 0  | 0 |
| 42 | 2 | 2 | 0  | 0 |
| 43 | 2 | 2 | 1  | 1 |
| 44 | 2 | 2 | 21 | 2 |
| 45 | 2 | 2 | 0  | 0 |
| 46 | 2 | 2 | 21 | 2 |
| 47 | 2 | 2 | 21 | 2 |
| 48 | 1 | 2 | 32 | 4 |
| 49 | 2 | 2 | 0  | 0 |
| 50 | 2 | 2 | 21 | 2 |
| 51 | 2 | 2 | 21 | 2 |
| 52 | 2 | 1 | 31 | 3 |
| 53 | 2 | 2 | 0  | 0 |
| 54 | 2 | 2 | 0  | 0 |
| 55 | 2 | 1 | 31 | 3 |
| 56 | 2 | 2 | 21 | 2 |
| 57 | 2 | 2 | 0  | 0 |
| 58 | 2 | 2 | 21 | 2 |
| 59 | 2 | 2 | 0  | 0 |
| 60 | 2 | 2 | 21 | 2 |

|    |   |   |    |   |
|----|---|---|----|---|
| 1  |   |   |    |   |
| 2  | 2 | 2 | 0  | 0 |
| 3  | 2 | 2 | 21 | 2 |
| 4  | 2 | 2 | 0  | 0 |
| 5  | 2 | 2 | 0  | 0 |
| 6  | 2 | 2 | 1  | 1 |
| 7  | 2 | 2 | 1  | 1 |
| 8  | 2 | 1 | 31 | 3 |
| 9  | 2 | 2 | 0  | 0 |
| 10 | 2 | 2 | 1  | 1 |
| 11 | 2 | 2 | 0  | 0 |
| 12 | 2 | 2 | 21 | 2 |
| 13 | 2 | 2 | 21 | 2 |
| 14 | 2 | 1 | 31 | 3 |
| 15 | 2 | 2 | 0  | 0 |
| 16 | 2 | 2 | 21 | 2 |
| 17 | 2 | 2 | 0  | 0 |
| 18 | 2 | 2 | 0  | 0 |
| 19 | 2 | 2 | 0  | 0 |
| 20 | 2 | 1 | 31 | 3 |
| 21 | 2 | 2 | 0  | 0 |
| 22 | 2 | 2 | 0  | 0 |
| 23 | 2 | 2 | 1  | 1 |
| 24 | 2 | 2 | 0  | 0 |
| 25 | 2 | 2 | 0  | 0 |
| 26 | 2 | 2 | 1  | 1 |
| 27 | 2 | 1 | 31 | 3 |
| 28 | 2 | 2 | 21 | 2 |
| 29 | 2 | 2 | 0  | 0 |
| 30 | 2 | 2 | 21 | 2 |
| 31 | 2 | 2 | 21 | 2 |
| 32 | 2 | 2 | 0  | 0 |
| 33 | 2 | 1 | 31 | 3 |
| 34 | 2 | 1 | 31 | 3 |
| 35 | 2 | 2 | 0  | 0 |
| 36 | 2 | 2 | 21 | 2 |
| 37 | 2 | 2 | 21 | 2 |
| 38 | 2 | 1 | 31 | 3 |
| 39 | 2 | 1 | 31 | 3 |
| 40 | 2 | 1 | 31 | 3 |
| 41 | 2 | 1 | 31 | 3 |
| 42 | 2 | 1 | 31 | 3 |
| 43 | 2 | 2 | 0  | 0 |
| 44 | 2 | 1 | 31 | 3 |
| 45 | 2 | 2 | 0  | 0 |
| 46 | 2 | 2 | 0  | 0 |
| 47 | 2 | 2 | 21 | 2 |
| 48 | 2 | 2 | 0  | 0 |
| 49 | 2 | 2 | 0  | 0 |
| 50 | 2 | 2 | 0  | 0 |
| 51 | 2 | 1 | 31 | 3 |
| 52 | 2 | 2 | 1  | 1 |
| 53 | 2 | 2 | 0  | 0 |
| 54 | 2 | 2 | 0  | 0 |
| 55 | 2 | 2 | 0  | 0 |
| 56 | 2 | 2 | 0  | 0 |
| 57 | 2 | 2 | 0  | 0 |
| 58 | 2 | 2 | 0  | 0 |
| 59 | 2 | 2 | 0  | 0 |
| 60 | 2 | 2 | 0  | 0 |



1  
2 2 2 0 0  
3  
4  
5  
6  
7  
8  
9  
10  
11  
12  
13  
14  
15  
16  
17  
18  
19  
20  
21  
22  
23  
24  
25  
26  
27  
28  
29  
30  
31  
32  
33  
34  
35  
36  
37  
38  
39  
40  
41  
42  
43  
44  
45  
46  
47  
48  
49  
50  
51  
52  
53  
54  
55  
56  
57  
58  
59  
60

For peer review only

|    |                                      |               |                |               |
|----|--------------------------------------|---------------|----------------|---------------|
| 1  |                                      |               |                |               |
| 2  | <b>SEX</b>                           | 1=men         | 2=women        |               |
| 3  | <b>AREA</b>                          | 1=urban       | 2=rural        |               |
| 4  | <b>Education</b>                     | 1=illiterate  | 2=primary      | 3=secondary   |
| 5  | <b>Occupation</b>                    | 1=service     | 2=business     | 3=housewife   |
| 6  | <b>Marrital status</b>               | 1=married     | 2=others       |               |
| 8  | <b>Insulin use</b>                   | 1=user        | 2=non-user     |               |
| 9  | <b>Current smoking</b>               | 1=smoking     | 2=other form   |               |
| 10 | <b>Current smokeless tobacco use</b> | 1=yes         | 2=non-user     |               |
| 11 | <b>Physical activity</b>             | 1=sufficient  | 2=insufficient |               |
| 12 | <b>Use fitting foot wear</b>         | 1=yes         | 2=non-user     |               |
| 14 | <b>History of trauma</b>             | 1=yes         | 2=no           |               |
| 15 | <b>Regular foot care</b>             | 1=yes         | 2=no           |               |
| 16 | <b>Self foot examination</b>         | 1=yes         | 2=no           |               |
| 17 | <b>Hypertension (HTN)</b>            | 1=yes         | 2=no           |               |
| 18 | <b>Diabetic retinopathy</b>          | 1=yes         | 2=no           |               |
| 19 | <b>Diabetic nephropathy</b>          | 1=yes         | 2=no           |               |
| 20 | <b>Diabetic neuropathy</b>           | 1=yes         | 2=no           |               |
| 21 | <b>Peripheral neuropathy</b>         | 1=yes         | 2=no           |               |
| 22 | <b>Peripheral arterial disease</b>   | 1=yes         | 2=no           |               |
| 23 | <b>Foot deformity</b>                | 1=yes         | 2=no           |               |
| 24 | <b>H/O amputation</b>                | 1=yes         | 2=no           |               |
| 25 | <b>H/O foot ulcer</b>                | 1=yes         | 2=no           |               |
| 27 | <b>IWGDF risk six categories</b>     | 0=group 1 (0) | 1=group 1 (1)  | 2=group 2A    |
| 28 | <b>IWGDF risk five categories</b>    | 0=group 1 (0) | 1=group 1 (1)  | 2=group 2A+2B |
| 29 |                                      |               |                |               |
| 30 |                                      |               |                |               |
| 31 |                                      |               |                |               |
| 32 |                                      |               |                |               |
| 33 |                                      |               |                |               |
| 34 |                                      |               |                |               |
| 35 |                                      |               |                |               |
| 36 |                                      |               |                |               |
| 37 |                                      |               |                |               |
| 38 |                                      |               |                |               |
| 39 |                                      |               |                |               |
| 40 |                                      |               |                |               |
| 41 |                                      |               |                |               |
| 42 |                                      |               |                |               |
| 43 |                                      |               |                |               |
| 44 |                                      |               |                |               |
| 45 |                                      |               |                |               |
| 46 |                                      |               |                |               |
| 47 |                                      |               |                |               |
| 48 |                                      |               |                |               |
| 49 |                                      |               |                |               |
| 50 |                                      |               |                |               |
| 51 |                                      |               |                |               |
| 52 |                                      |               |                |               |
| 53 |                                      |               |                |               |
| 54 |                                      |               |                |               |
| 55 |                                      |               |                |               |
| 56 |                                      |               |                |               |
| 57 |                                      |               |                |               |
| 58 |                                      |               |                |               |
| 59 |                                      |               |                |               |
| 60 |                                      |               |                |               |

1  
2  
3  
4  
5  
6  
7  
8  
9  
10  
11  
12  
13  
14  
15  
16  
17  
18  
19  
20  
21  
22  
23  
24  
25  
26  
27  
28  
29  
30  
31  
32  
33  
34  
35  
36  
37  
38  
39  
40  
41  
42  
43  
44  
45  
46  
47  
48  
49  
50  
51  
52  
53  
54  
55  
56  
57  
58  
59  
60

4=higher education  
4=others

22=group 2B

31=group 3A  
31=group 3A

32=group 3B  
32=group 3B

For peer review only

# BMJ Open

## Risk of diabetic foot ulcer and its associated factors among Bangladeshi subjects: a multi-centric cross-sectional study

|                                 |                                                                                                                                                                                                                                                                                                                                                                                                                                                                                                                                                                                                                     |
|---------------------------------|---------------------------------------------------------------------------------------------------------------------------------------------------------------------------------------------------------------------------------------------------------------------------------------------------------------------------------------------------------------------------------------------------------------------------------------------------------------------------------------------------------------------------------------------------------------------------------------------------------------------|
| Journal:                        | <i>BMJ Open</i>                                                                                                                                                                                                                                                                                                                                                                                                                                                                                                                                                                                                     |
| Manuscript ID                   | bmjopen-2019-034058.R2                                                                                                                                                                                                                                                                                                                                                                                                                                                                                                                                                                                              |
| Article Type:                   | Original research                                                                                                                                                                                                                                                                                                                                                                                                                                                                                                                                                                                                   |
| Date Submitted by the Author:   | 14-Dec-2019                                                                                                                                                                                                                                                                                                                                                                                                                                                                                                                                                                                                         |
| Complete List of Authors:       | <p>Banik, Palash; Bangladesh Institute of Health Sciences, Community Medicine; Bangladesh University of Health Sciences, Noncommunicable Diseases</p> <p>Barua, Lingkan; Bangladesh University of Health Sciences, Noncommunicable Diseases</p> <p>Moniruzzaman, Mohammad; Bangladesh Institute of Health Sciences, Community Medicine</p> <p>Mondal, Rajib; Bangladesh University of Health Sciences, Noncommunicable Diseases</p> <p>Zaman, Farhana; Bangladesh Institute of Health Sciences, Community Medicine</p> <p>Ali, Liaquat; Bangladesh University of Health Sciences, Biochemistry and Cell Biology</p> |
| <b>Primary Subject Heading</b>: | Diabetes and endocrinology                                                                                                                                                                                                                                                                                                                                                                                                                                                                                                                                                                                          |
| Secondary Subject Heading:      | Diabetes and endocrinology, Epidemiology, Public health, Neurology                                                                                                                                                                                                                                                                                                                                                                                                                                                                                                                                                  |
| Keywords:                       | Diabetic foot < DIABETES & ENDOCRINOLOGY, DIABETES & ENDOCRINOLOGY, Bangladesh, diabetic foot ulcer risk, International Working Group on the Diabetic Foot, diabetic foot ulcer                                                                                                                                                                                                                                                                                                                                                                                                                                     |
|                                 |                                                                                                                                                                                                                                                                                                                                                                                                                                                                                                                                                                                                                     |

SCHOLARONE™  
Manuscripts



I, the Submitting Author has the right to grant and does grant on behalf of all authors of the Work (as defined in the below author licence), an exclusive licence and/or a non-exclusive licence for contributions from authors who are: i) UK Crown employees; ii) where BMJ has agreed a CC-BY licence shall apply, and/or iii) in accordance with the terms applicable for US Federal Government officers or employees acting as part of their official duties; on a worldwide, perpetual, irrevocable, royalty-free basis to BMJ Publishing Group Ltd ("BMJ") its licensees and where the relevant Journal is co-owned by BMJ to the co-owners of the Journal, to publish the Work in this journal and any other BMJ products and to exploit all rights, as set out in our [licence](#).

The Submitting Author accepts and understands that any supply made under these terms is made by BMJ to the Submitting Author unless you are acting as an employee on behalf of your employer or a postgraduate student of an affiliated institution which is paying any applicable article publishing charge ("APC") for Open Access articles. Where the Submitting Author wishes to make the Work available on an Open Access basis (and intends to pay the relevant APC), the terms of reuse of such Open Access shall be governed by a Creative Commons licence – details of these licences and which [Creative Commons](#) licence will apply to this Work are set out in our licence referred to above.

Other than as permitted in any relevant BMJ Author's Self Archiving Policies, I confirm this Work has not been accepted for publication elsewhere, is not being considered for publication elsewhere and does not duplicate material already published. I confirm all authors consent to publication of this Work and authorise the granting of this licence.

1  
2  
3 **1 Risk of diabetic foot ulcer and its associated factors among Bangladeshi subjects:**  
4 **2 a multi-centric cross-sectional study**

5  
6  
7  
8 3 Palash Chandra Banik<sup>1,2\*</sup>, Lingkan Barua<sup>2</sup>, Mohammad Moniruzzaman<sup>1</sup>, Rajib Mondal<sup>2</sup>,  
9  
10 4 Farhana Zaman<sup>1</sup>, and Liaquat Ali<sup>3</sup>

11  
12 5 <sup>1</sup>Department of Community Medicine, Bangladesh Institute of Health Sciences, 125/1  
13  
14 6 Darus Salam, Mirpur-1, Dhaka-1216, Bangladesh

15  
16  
17 7 <sup>2</sup>Department of Noncommunicable Diseases, Bangladesh University of Health  
18  
19 8 Sciences, 125/1 Darus Salam, Mirpur-1, Dhaka-1216, Bangladesh

20  
21 9 <sup>3</sup>Department of Biochemistry and Cell Biology, Bangladesh University of Health  
22  
23 10 Sciences, 125/1 Darus Salam, Mirpur-1, Dhaka-1216, Bangladesh

24  
25  
26 11 **\* Corresponding author**

27  
28 12 Palash Chandra Banik

29  
30  
31 13 Assistant Professor, Department of Noncommunicable Diseases, Bangladesh  
32  
33 14 University of Health Sciences (BUHS), 125/1 Darus Salam, Mirpur-1, Dhaka-1216,  
34  
35 15 Bangladesh

36  
37 16 Email: [palashcbanic@gmail.com](mailto:palashcbanic@gmail.com)

38  
39  
40 17 Word count (main text): 4518 (excluding title page, abstract, tables,  
41  
42 18 acknowledgements, contributions and references)

43  
44 19 Word count (abstract): 274 (excluding keywords)

45  
46  
47 20

48  
49  
50 21

51  
52  
53 22

54  
55  
56 23

57  
58  
59 24

## 25 **Abstract**

### 26 **Objective**

27 To assess the risk of diabetic foot ulcer (DFU) and find out its associated factors  
28 among type 2 diabetic (T2D) subjects of Bangladesh.

### 29 **Design, setting and participants**

30 This cross-sectional study recruited 1200 T2D subjects who visited sixteen centres of  
31 Health Care Development Project run by Diabetic Association of Bangladesh (DAB).

### 32 **Primary and secondary outcome measures**

33 Risk of DFU was assessed using a modified version of International Working Group  
34 on the Diabetic Foot (IWGDF) Risk Classification System. The modified system was  
35 based on five parameters, namely peripheral neuropathy (PN), peripheral arterial  
36 diseases (PAD), deformity, ulcer history and amputation. The risks were categorised  
37 as Group 0 (no PN, no PAD), Group 1 (PN, no PAD, and no deformity), Group 2A (PN  
38 and deformity, no PAD), Group 2B (PAD), Group 3A (ulcer history) and Group 3B  
39 (amputation). The associated factors of DFU risk were determined using multinomial  
40 logistic regression for each risk category separately.

### 41 **Results**

42 Overall, 44.5% of the subjects were found 'at risk' of DFU. This risk was higher among  
43 men (45.6%) than women and among those who lived in rural areas (45.5%) as  
44 compared to the urban population. According to IWGDF categories, the risk was  
45 distributed as 55.5%, 4.2%, 11.6%, 0.3%, 20.6% and 7.9% for group 0, group 1, group  
46 2A, group 2B, group 3A and group 3B respectively. The associated factors of DFU  
47 (odd ratio >1) were age  $\geq 50$  years, rural area, low economic status, insulin use, history  
48 of trauma, diabetic retinopathy and diabetic nephropathy.

### 49 **Conclusion**

50 A significant number of the T2D subjects under study were at risk of DFU, which

1  
2  
3  
4 51 demands an effective screening programme to reduce DFU related morbidity and  
5  
6 52 mortality.

7  
8 53 **Keywords:** diabetes; diabetic foot ulcer; diabetic foot ulcer risk; Bangladesh;  
9  
10 54 International Working Group on the Diabetic Foot; associated factors; risk factors

## 11 12 55 **Article summary**

### 13 14 15 56 **Strengths and limitations of this study**

- 16  
17 57 • This is the first study in Bangladesh that assesses the risk of DFU using a standard  
18  
19 58 tool
- 20  
21 59 • For the first time, the associated factors of DFU were explored to guide the  
22  
23 60 prevention effort
- 24  
25 61 • Sex- and area-specific difference in the risk of DFU will help to identify the  
26  
27 62 disparities and promote decentralisation of diabetes care for all
- 28  
29 63 • Because of the cross-sectional design, we could not establish any causal  
30  
31 64 relationship between the contributing factors and risk of DFU
- 32  
33 65 • The risk of DFU may be overestimated or underestimated as all centres did not  
34  
35 66 provide the same quality diabetes care

36  
37  
38 67

39  
40  
41 68

42  
43  
44 69

45  
46  
47 70

48  
49  
50 71

51  
52  
53 72

54  
55  
56 73

57  
58  
59 74

60



## 75 Introduction

76 In recent years, diabetes mellitus (DM) has become a fast-growing public health  
77 problem that affects both developed and developing countries [1]. The International  
78 Diabetes Federation (IDF) reports that about 415 million people globally had DM in  
79 2015 and it is projected to affect 642 million by 2040. It was deemed possible that by  
80 the year 2040 it might even double the number [2]. Among the clinical classifications  
81 of DM, Type 2 diabetes (T2D) is more common and prevalent in certain ethnic groups,  
82 with estimates up to six times more common in the people of South Asian descent,  
83 three times more common in those of African and African-Caribbean descent and is  
84 more common in people of Chinese descent compared with the white population [3].

85 Like in other developed and developing countries affected by it, it is also highly  
86 prevalent in Bangladesh. Evidence suggests that 9.7% of Bangladeshi adult population  
87 (>35 years) are diabetic and 22.4% are prediabetic [4]. A trend analysis revealed an  
88 increasing prevalence of DM in Bangladesh, from 4% in 1995 to 2000 and 5% in 2001  
89 to 2005 to 9% in 2006 to 2010 respectively [5]. As the prevalence of diabetes increases,  
90 the prevalence of long-term diabetes-related complications is also likely to increase.  
91 Diabetic foot ulcer (DFU) is a common and major complication of diabetes,  
92 representing a major healthcare burden with significant morbidity [6].

93 Diabetic foot is defined as the presence of infection, ulceration and/or destruction of  
94 deep tissues associated with neurologic abnormalities and various degrees of  
95 peripheral arterial disease (PAD) in the lower limb in patients with diabetes [7]. It is a  
96 significant cause of morbidity and can lead to prolonged hospital stays, which is  
97 evidenced by the fact that ~20% of diabetes related hospitalisations are related to DFU  
98 [8]. The mortality rate in patients with DFU is also high and is approximately twice that  
99 of the patients without ulceration [9]. Other than morbidity and mortality, the toll of  
100 economic burden in terms of direct and indirect costs is also high for those having  
101 DFU, estimated approximately €11.6 billion per year for Europe in 2017 and €7.6–11  
102 billion among Medicare beneficiaries of the United States from 2007 to 2014 [7].

1  
2  
3 103 Another issue related to foot ulcers among diabetic patient is the health-related quality  
4  
5 104 of life that cannot be measured in economic terms. It has been reported that patients  
6  
7 105 with foot ulcers or amputation have low health-related quality of life because of  
8  
9 106 substantial depression and other physical problems like inability to do simple tasks or  
10  
11 107 recreational activities [7].  
12

13  
14 108 The major risk factors of DFU are a loss of protective sensation due to diabetic  
15  
16 109 peripheral neuropathy (DPN), peripheral arterial diseases (PAD) and trauma. However,  
17  
18 110 the first two are not independently responsible for DFU; it is the combination  
19  
20 111 neuropathy and PAD with trauma that leads to foot problems. It has been reported  
21  
22 112 that trauma and PAD are major contributors to foot ulceration and diabetic neuropathy  
23  
24 113 is the common denominator in almost 90% of DFU cases. There are some other risk  
25  
26 114 factors namely male gender, previous foot ulceration or amputation, foot deformities,  
27  
28 115 calluses, Charcot arthropathy and high plantar pressures have been associated with an  
29  
30 116 increased risk for foot ulceration. There are some diabetes-related risk factors also that  
31  
32 117 influence the risk of foot ulcers such as the duration of diabetes, poor glycaemic  
33  
34 118 control, diabetic retinopathy or nephropathy, poor compliance with medical  
35  
36 119 instructions and neglectful behaviour. Some societal and behavioural risk factors also  
37  
38 120 show significant association with DFU including low socioeconomic condition, poor  
39  
40 121 access to healthcare services, poor educational status, living alone and smoking [7, 10].  
41  
42 122 Previous studies have reported that the risk of diabetic foot or amputation is  
43  
44 123 significantly lower among the Asians compared to the Europeans in the United  
45  
46 124 Kingdom [11–12]. This reduced risk is probably due to a low prevalence of DPN and  
47  
48 125 PAD among Asians, but the exact reason is not fully understood. However, a previous  
49  
50 126 study has reported prevalence of DPN among Bangladeshi subjects at 19.7% and  
51  
52 127 found it significantly as well as independently associated with age, mode of treatment,  
53  
54 128 income, duration of diabetes and glycaemic status [13].  
55

56 129 It is estimated that the lifetime risk of foot ulcers among diabetic population is 19%–  
57  
58 130 34% [7]. To overcome this burden of DFU, it is recommended that clinicians estimate  
59  
60

1  
2  
3 131 the risk of and the response to associated factors that increase the risk [10]. However,  
4  
5 132 studies related to diabetic foot risk assessment and associated factors among  
6  
7 133 Bangladeshi subjects are absolutely lacking. Hence, we were prompted to assess the  
8  
9 134 risk of foot ulcers and sought to determine the factors that influence the risk among  
10  
11 135 T2D patients of Bangladesh.  
12

## 136 **Methods**

### 137 **Study design**

138 This cross-sectional study was conducted among 1200 T2D subjects who visited  
139 several centres of Health Care Development Project (HCDP) run by the Diabetic  
140 Association of Bangladesh (DAB). A total of sixteen centres were selected: seven from  
141 Dhaka and nine from the northern part of Bangladesh. We purposefully selected the  
142 centres and followed convenient sampling technique to collect data from diabetic  
143 subjects. Our exclusion criteria included presence of DFU during the interview (active  
144 ulcer), acute illness of the subject, unwillingness to participate and mental instability.  
145 To meet the eligibility criteria, all subjects were screened for DFU, based on their self-  
146 reported statement, their clinical history, foot examination and medical records review.  
147

### 147 **Data collection and measurement**

148 The data collection comprised of two phases and was conducted from July 2011 to  
149 June 2012. In the first phase, a face-to-face interview was conducted using a pre-tested  
150 questionnaire adapted from the STEP-wise approach to Surveillance (STEPS) of  
151 noncommunicable diseases risk factors of World Health Organization (WHO) [14]. The  
152 questionnaire collected sociodemographic and behavioural risk factors (tobacco use,  
153 physical inactivity), status of diabetes (duration, medication) and its complications  
154 (retinopathy, nephropathy) and foot problem-related information (neuropathy, PAD,  
155 trauma, foot hygiene) of the participants. The blood glucose levels (fasting/2-hours  
156 post meal) and information about diabetic nephropathy or retinopathy in the  
157 participants was extracted from their diabetes records book. The last record within one  
158 month was used to assess their glycaemic status. In the second phase, physical

1  
2  
3 159 measurements (anthropometric and blood pressure) and foot examination were  
4  
5 160 carried out by trained physicians. The anthropometric and blood pressure  
6  
7 161 measurement followed the methods described in 'Noncommunicable disease risk  
8  
9 162 factors survey Bangladesh 2010' [15]. The anthropometric measurements included  
10  
11 163 height, weight, waist circumference, hip circumference and derivatives like body mass  
12  
13 164 index (BMI) and waist-hip ratio.

### 165 **Assessment of DFU**

166 The risk of DFU was assessed using a modified version of International Working Group  
167 on the Diabetic Foot (IWGDF) Risk Classification System proposed by Lavery *et al.* [16].  
168 We screened each patient to identify lower extremity complications and presence of  
169 any risk factors, like ulcerations, amputation, peripheral neuropathy (PN), PAD, foot  
170 deformities and limited joint mobility using the methods followed by Lavery *et al.* [16–  
171 17]. We used a 10 g Semmes-Weinstein monofilament and vibration perception  
172 threshold tester to assess PN, palpation of the pulses and Ankle Brachial Index (ABI) to  
173 detect PAD, goniometer to identify foot deformity and clinical examinations to  
174 evaluate joint mobility. The risks were categorised according to the modified IWGDF  
175 risk classification system: Group 0 (no PN, no PAD), Group 1 (PN, no PAD, no  
176 deformity), Group 2A (PN and deformity, no PAD), Group 2B (PAD), Group 3A (ulcer  
177 history) and Group 3B (amputation). Here, Group 0 indicated 'no risk' and rest of the  
178 groups (1, 2A, 2B, 3A, 3B) classified the study population 'at risk' of in varying degrees

### 179 **Ascertainment of key variables**

#### 180 *Peripheral neuropathy*

181 PN was defined as lack of feeling/protective sensation (at four or more of 10 sites) [18]  
182 and vibration perception threshold value in either foot >25 volts using an  
183 electromechanical instrument [17].

#### 184 *Peripheral arterial disease*

185 We defined PAD as non-palpable dorsalis pedis or posterior tibial arterial pulse and

1  
2  
3 186 ABI in either foot as  $<0.80$  [16].  
4

5  
6 187 *Limited joint mobility*  
7

8 188 Limited joint mobility was defined based on three averaged measurements of the first  
9  
10 189 metatarsophalangeal joint, the subtalar joint and ankle joint range of motion of the  
11  
12 190 forefoot, rear foot and ankle. From these measurements, we determined the presence  
13  
14 191 of ankle joint equinus ( $<0^\circ$  dorsiflexion), limited subtalar joint motion ( $<20^\circ$  total joint  
15  
16 192 motion), and hallux rigidus ( $<50^\circ$  hallux dorsiflexion) [18]. It was measured using  
17  
18 193 goniometer and details technique was described elsewhere (see online supplementary  
19  
20 194 file 1)  
21

22  
23 195 *Foot deformity*  
24

25 196 Deformity was defined as any contracture that could not be fully corrected manually,  
26  
27 197 such as hallux valgus, hammer toes or claw toes, hallux rigidus and ankle equines [16].  
28  
29 198 It was measured using goniometer and details technique was described elsewhere (see  
30  
31 199 online supplementary file 1).  
32

33  
34 200 *Foot ulcer*  
35

36 201 Foot ulcers were defined as full thickness wounds involving the foot or the ankle [19].  
37

38  
39 202 **Quality assurance**  
40

41 203 To ensure standard quality control, a panel of senior researchers and survey  
42  
43 204 investigators visited the data collection sites to monitor the research activities. To  
44  
45 205 prevent bias, monitoring panel was anonymised for the data collectors. All team  
46  
47 206 members including investigators, supervisor and data collectors participated in  
48  
49 207 intensive three consecutive training programmes (lasting two and a half days) in Dhaka  
50  
51 208 before the survey. The first training program was conducted for the physicians  
52  
53 209 (doctors) who were involved in foot examination. This training program focused on  
54  
55 210 'Detection of Diabetic Foot Problem at the Early Stage' through screening using a  
56  
57 211 standard instrument. A certified neurologist from a reputed post-graduate training  
58  
59 212 institution was appointed as a resource person to conduct the sessions. Second and  
60

1  
2  
3 213 third training programmes were conducted for the volunteering data collectors  
4  
5 214 selected from undergraduate physiotherapy students, who interviewed the  
6  
7 215 respondents to fill-up the questionnaire. The purpose of this training was to inform  
8  
9 216 the data collectors about potential difficulties associated with data collection. During  
10  
11 217 this intensive training, data collectors got practical training about self-administration  
12  
13 218 of a questionnaire, physical measurement and maintenances of data collection  
14  
15 219 environment. Other than these, we also followed specific protocols to assure quality of  
16  
17 220 the study that included: (1) pre-testing of the questionnaire and data collection  
18  
19 221 procedure (2) standard method of measurement as per STEPS survey 2010 of  
20  
21 222 Bangladesh (3) used show cards for a better understanding of different forms of  
22  
23 223 tobacco use and intensity of physical activities (4) adequate privacy during physical  
24  
25 224 measurements and clinical examinations (5) robust equipment for physical  
26  
27 225 measurement and clinical examination. None of the quality control observer reported  
28  
29 226 any violation of physical measurement and data collection.

### 227 **Patient and public involvement**

228 We collected data from the patients who visited the selected diabetes care centres of  
229 DAB. However, they were not involved directly in the setting of the research question  
230 or outcome measures. They did not have any role in designing or implementing this  
231 work or interpretation of the results.

### 232 **Ethical consideration**

233 The purpose of the study, rights of the respondents and data safety issues were  
234 explained to each participant. All subjects gave their informed written consent for  
235 inclusion before they participated in the study (see online supplementary file 2). The  
236 study was conducted in accordance with the Declaration of Helsinki, and the protocol  
237 was approved by the Ethical Review Committee of Bangladesh Diabetic Association  
238 (Identification number: BADAS/BIO/EA/11/033) on January 17, 2011 (see online  
239 supplementary file 3).

### 240 **Data processing and analysis**

1  
2  
3 241 Data (see online supplementary file 4) were analysed using the Statistical Package for  
4  
5 242 Social Science (SPSS) version 20.0 for Windows (SPSS, Inc. Chicago. IL. USA). All  
6  
7 243 estimates of precision were presented at 95% confidence interval (CI) in the tables.  
8  
9 244 Descriptive analysis included mean, standard deviation (SD), median and interquartile  
10  
11 245 range (IQR), frequencies and percentages where appropriate. In this study, the  $p$ -value  
12  
13 246 (two-sided) was considered statistically significant at the threshold of  $p < 0.05$ . In our  
14  
15 247 study, there were only three respondents with PAD. Hence, we had to merge group 2B  
16  
17 248 with group 2A and make a new group 2-A/B that was used in multinomial logistic  
18  
19 249 regression analysis.

20  
21  
22 250 To find the factors that influenced the risk of DFU, first we run chi-square test  
23  
24 251 considering modified IWGDF risk classification as a dependent variable. Variables that  
25  
26 252 showed significant association ( $p < 0.05$ ) with the dependent variable in the chi-square  
27  
28 253 test were identified. Then statistically significant variables were examined as  
29  
30 254 independent variable against the dependent variable in the multinomial logistic  
31  
32 255 regression analysis. For multinomial logistic regression analysis, we calculated odds  
33  
34 256 ratios (OR), and 95% CI for each independent variable. In the regression table,  
35  
36 257 predictors that had OR  $> 1$  were presented for each risk category. We ensured presence  
37  
38 258 of no multicollinearity using variance inflation factor (VIF) to run the regression  
39  
40 259 analysis. We used the STROBE (Strengthening the Reporting of Observational Studies  
41  
42 260 in Epidemiology) guidelines for reporting the results of cross-sectional observational  
43  
44 261 study (see online supplementary file 5).

## 262 **Results**

### 263 **Sociodemographic characteristics and diabetes-related information**

51 264 The mean age of the participants was  $51.6 \pm 11.9$  years and most of them (33.1%) were  
52  
53 265 in the 50–59 year age group. More than half of the participants were women (62.9%)  
54  
55 266 and predominantly urban residents (67.3%). Most of them had completed primary level  
56  
57 267 education (36.7%), 99% were married, 57.8% were housewives and 44.5% came from  
58  
59 268 middle-income background. However, urban participants were more literate (88.2%)  
60

and economically stable (60.3% >lower-middle-income range) than their rural counterparts. The mean duration of diabetes was  $6.9 \pm 5.9$  years and a majority of them had uncontrolled glycaemic status (89.3%). Among the diabetes-related complications, retinopathy (14.3%) was much higher than nephropathy (5.6%). No mentionable urban-rural difference was observed for the glycaemic status and diabetic nephropathy (Table 1).

**Table 1: Sociodemographic and diabetes-related information of the study subjects,  $n=1200$**

| Variables                     | Urban           |           | Rural           |           | Total           |           |
|-------------------------------|-----------------|-----------|-----------------|-----------|-----------------|-----------|
|                               | <i>n</i> (%)    | 95% CI    | <i>n</i> (%)    | 95% CI    | <i>n</i> (%)    | 95% CI    |
| <b>Age (years)*</b>           | 52.3 $\pm$ 11.9 |           | 50.2 $\pm$ 11.8 |           | 51.6 $\pm$ 11.9 |           |
| <b>Age categories (years)</b> |                 |           |                 |           |                 |           |
| <30                           | 52 (4)          | 2.6–5.4   | 22 (5.6)        | 3.3–7.9   | 54 (4.5)        | 3.3–5.7   |
| 30–39                         | 63 (7.8)        | 5.9–9.7   | 39 (9.9)        | 14.6–18   | 102 (8.5)       | 6.9–10.1  |
| 40–49                         | 212 (26.3)      | 23.3–29.3 | 109 (27.7)      | 23.3–32.1 | 321 (26.8)      | 24.3–29.3 |
| 50–59                         | 270 (33.5)      | 30.2–36.8 | 127 (32.3)      | 27.7–36.9 | 397 (33.1)      | 30.4–35.8 |
| $\geq 60$                     | 230 (28.5)      | 25.4–31.6 | 96 (24.4)       | 20.2–28.6 | 326 (27.2)      | 24.7–29.7 |
| <b>Sex</b>                    |                 |           |                 |           |                 |           |
| Men                           | 302 (37.4)      | 34.1–40.7 | 143 (36.4)      | 31.6–41.2 | 445 (37.1)      | 34.4–39.8 |
| Women                         | 505 (62.6)      | 59.3–65.9 | 250 (63.6)      | 58.8–68.4 | 755 (62.9)      | 60.2–65.6 |
| <b>Educational status</b>     |                 |           |                 |           |                 |           |
| Illiterate                    | 95 (11.8)       | 9.6–14    | 107 (27.2)      | 22.8–31.6 | 202 (16.8)      | 14.7–18.9 |
| Primary                       | 288 (35.7)      | 32.4–39   | 152 (38.7)      | 33.9–43.5 | 440 (36.7)      | 34–39.4   |
| Secondary                     | 265 (32.8)      | 29.6–36   | 98 (24.9)       | 20.6–29.2 | 363 (30.3)      | 27.7–32.9 |



1  
2  
3  
4  
5  
6  
7  
8  
9  
10  
11  
12  
13  
14  
15  
16  
17  
18  
19  
20  
21  
22  
23  
24  
25  
26  
27  
28  
29  
30  
31  
32  
33  
34  
35  
36  
37  
38  
39  
40  
41  
42  
43  
44  
45  
46  
47  
48  
49  
50  
51  
52  
53  
54  
55  
56  
57  
58  
59  
60

|                                        |                     |           |                    |            |                     |           |
|----------------------------------------|---------------------|-----------|--------------------|------------|---------------------|-----------|
| Higher education                       | 159<br>(19.7)       | 17–22.4   | 36 (9.2)           | 6.3–12.1   | 195<br>(16.3)       | 14.2–18.4 |
| <b>Marital status</b>                  |                     |           |                    |            |                     |           |
| Married                                | 797<br>(98.8)       | 98–99.6   | 391<br>(99.5)      | 98.8–100.2 | 1188<br>(99)        | 98.4–99.6 |
| Others                                 | 10 (1.2)            | 0.4–2     | 2 (0.5)            | -0.2–1.2   | 12 (1)              | 0.4–1.6   |
| <b>Occupational status</b>             |                     |           |                    |            |                     |           |
| Service                                | 184<br>(22.8)       | 19.9–25.7 | 49 (12.5)          | 9.2–15.8   | 233<br>(19.4)       | 17.2–21.6 |
| Business                               | 89 (11)             | 8.8–13.2  | 38 (9.7)           | 6.8–12.6   | 127<br>(10.6)       | 8.9–12.3  |
| Housewife                              | 462<br>(57.2)       | 53.8–60.6 | 231<br>(58.8)      | 53.9–63.7  | 693<br>(57.8)       | 55–60.6   |
| Others                                 | 72 (8.9)            | 6.9–10.9  | 75 (15.2)          | 11.7–18.7  | 147<br>(12.3)       | 10.4–14.2 |
| <b>Monthly household income (BDT)†</b> | 20000 (10000–40000) |           | 10000 (6000–20000) |            | 20000 (10000–30000) |           |
| <b>Monthly household income groups</b> |                     |           |                    |            |                     |           |
| <4907 (low)                            | 21 (2.6)            | 1.5–3.7   | 41 (10.4)          | 7.4–13.4   | 62 (5.2)            | 3.9–6.5   |
| 4907–19,488 (lower-middle)             | 299<br>(37.1)       | 33.8–40.4 | 238<br>(60.6)      | 55.8–65.4  | 537<br>(44.8)       | 42–47.6   |
| 19489–60252 (upper-middle)             | 422<br>(52.3)       | 48.9–55.7 | 108<br>(27.5)      | 23.1–31.9  | 530<br>(44.2)       | 41.4–47   |
| >60,252 (high)                         | 65 (8.1)            | 6.2–10    | 6 (1.5)            | 0.3–2.7    | 71 (5.9)            | 4.6–7.2   |
| <b>Duration of diabetes (years)*</b>   | 7.3 ±6              |           | 6.3 ±5.8           |            | 6.9 ±5.9            |           |
| <b>Glycaemic status§</b>               |                     |           |                    |            |                     |           |
| Controlled                             | 87 (10.8)           | 8.7–12.9  | 42 (10.7)          | 7.6 -13.8  | 129<br>(10.8)       | 9–12.6    |
| Uncontrolled                           | 720<br>(89.2)       | 87.1–91.3 | 351<br>(89.3)      | 86.2–92.4  | 1071<br>(89.3)      | 87.6–91   |
| <b>Diabetic retinopathy</b>            | 134<br>(16.6)       | 14–19.2   | 38 (9.7)           | 6.8–12.6   | 172<br>(14.3)       | 12.3–16.3 |
| <b>Diabetic nephropathy</b>            | 46 (5.7)            | 4.1–7.3   | 21 (5.3)           | 3.1–7.5    | 67 (5.6)            | 4.3–6.9   |

277 \*Representing mean and standard deviation,

278 †Presented as median with interquartile range,

279 ‡According to the 2006 per-capita gross national income (GNI) and the World Bank calculation

280 §Based on plasma glucose level pre-meal (fasting) <6.1 mmol/l and/or two hours post meal <7.8  
281 mmol/l

## 282 Risk of DFU among the study population

283 Table 2 shows the sex and area-specific distribution of the DFU risk according to the  
284 modified version of IWGDF classification. Overall, 44.5% of the study population was  
285 diagnosed as 'at risk' of DFU and the burden was higher among men (45.6%) and those  
286 who lived in rural areas (45.5%). The risk of DFU according to the modified version of  
287 IWGDF was 55.5%, 4.2%, 11.6%, 0.3%, 20.6% and 7.9% for group 0, group 1, group 2A,  
288 group 2B, group 3A and group 3B respectively. Among the six groups of risk  
289 classification, group 3A (ulcer history) showed maximum risk (20.6%) compared to  
290 other groups. For sex and area variables, 21.8% of men and one-fourth of the rural  
291 residents (25.7%) had a previous history of foot ulceration.

292 **Table 2: Sex and area-specific distribution of DFU risk among the study subjects, n = 1200**

| IWGDF DFU risk classification       | Sex        |            | Area of residence |            | Overall    |
|-------------------------------------|------------|------------|-------------------|------------|------------|
|                                     | Men        | Women      | Urban             | Rural      |            |
|                                     | n (%)      | n (%)      | n (%)             | n (%)      |            |
| Group 0 (no PN, no PAD)             | 242 (54.4) | 430 (57)   | 452 (56)          | 214 (54.5) | 666 (55.5) |
| Group 1 (PN, no PAD, no deformity)  | 18 (4)     | 32 (4.2)   | 32 (4)            | 18 (4.6)   | 50 (4.2)   |
| Group 2A (PN and deformity, no PAD) | 49 (11)    | 90 (11.9)  | 103<br>(12.8)     | 36 (9.2)   | 139 (11.6) |
| Group 2B (PAD)                      | 1(0.2)     | 2 (0.3)    | 3 (0.4)           | 0          | 3 (0.3)    |
| Group 3A (ulcer history)            | 97 (21.8)  | 150 (19.9) | 146<br>(18.1)     | 101 (25.7) | 247 (20.6) |
| Group 3B (amputation)               | 38 (8.5)   | 57 (7.5)   | 71 (8.8)          | 24 (6.1)   | 95 (7.9)   |

293 IWGDF, International Working Group on the Diabetic Foot; DFU, diabetic foot ulcer, PN, peripheral  
294 neuropathy; PAD, peripheral arterial disease

## 295 Factors associated with the risk of DFU among the study subjects

296 Table 3 shows the associated factors of DFU risk among the study population. Total six

297 factors were identified which showed high odds (>1) for different groups at risk: age  
 298 (group 2-A/B, OR 1.212; group 3B, OR 1.173), area of residence (group 1, OR 1.188;  
 299 group 3A, OR 1.461), monthly income (group 2-A/B, OR 1.491; group 3A, OR 1.415;  
 300 group 3B, OR 1.768), medication (group 2-A/B, OR 1.014), history of trauma (group 1,  
 301 OR 2.015; group 2-A/B, OR 1.032; group 3A, OR 2.998; group 3B, OR 3.104), diabetic  
 302 retinopathy (group 1, OR 1.104; group 3B, OR, 1.933) and diabetic nephropathy (group  
 303 1, OR 2.174; group 3A, OR 1.260; group 3B, OR 2.389).

304 Overall, the odds for risk of DFU was higher among those who were  $\geq 50$  years old,  
 305 lived in rural areas, had a monthly income  $\leq 19,488$  BDT, had a previous history of foot  
 306 ulcer, were insulin user and had diabetic complications as retinopathy or nephropathy.

307 **Table 3: Associated factors of diabetic foot ulcer among type 2 diabetic subjects of Bangladesh**  
 308 **using multinomial logistic regression,  $n = 1200$**

| Risk groups | Predictors           | B     | p-value | OR          | 95% CI for OR |             |
|-------------|----------------------|-------|---------|-------------|---------------|-------------|
|             |                      |       |         |             | Lower Bound   | Upper Bound |
| Group 1     | Area of residence    |       |         |             |               |             |
|             | Rural area           | 0.172 | 0.573   | 1.188       | 0.652         | 2.165       |
|             | Urban area           |       |         | <i>Ref.</i> |               |             |
|             | History of trauma    |       |         |             |               |             |
|             | Present              | 0.7   | 0.076   | 2.015       | 0.929         | 4.369       |
|             | Absent               |       |         | <i>Ref.</i> |               |             |
|             | Diabetic retinopathy |       |         |             |               |             |
|             | Present              | 0.099 | 0.814   | 1.104       | 0.486         | 2.508       |
|             | Absent               |       |         | <i>Ref.</i> |               |             |
|             | Diabetic nephropathy |       |         |             |               |             |
|             | Present              | 0.526 | 0.14    | 2.174       | 755           | 6.099       |
|             | Absent               |       |         | <i>Ref.</i> |               |             |

|    |              |                      |       |         |             |       |
|----|--------------|----------------------|-------|---------|-------------|-------|
| 1  |              |                      |       |         |             |       |
| 2  |              |                      |       |         |             |       |
| 3  |              | Age                  |       |         |             |       |
| 4  |              |                      |       |         |             |       |
| 5  |              | ≥50 years            | 0.192 | 0.324   | 1.212       | 0.827 |
| 6  |              |                      |       |         |             | 1.774 |
| 7  |              | <50 years            |       |         | <i>Ref.</i> |       |
| 8  |              |                      |       |         |             |       |
| 9  |              | Monthly income (BDT) |       |         |             |       |
| 10 |              |                      |       |         |             |       |
| 11 |              | ≤19,488              | 0.4   | 0.039*  | 1.491       | 1.020 |
| 12 |              |                      |       |         |             | 2.181 |
| 13 |              | >19,488              |       |         | <i>Ref.</i> |       |
| 14 | Group 2-A/B† |                      |       |         |             |       |
| 15 |              | Medication           |       |         |             |       |
| 16 |              |                      |       |         |             |       |
| 17 |              | Insulin user         | 0.013 | 0.945   | 1.014       | 0.692 |
| 18 |              |                      |       |         |             | 1.485 |
| 19 |              | Insulin non-user     |       |         | <i>Ref.</i> |       |
| 20 |              |                      |       |         |             |       |
| 21 |              | History of trauma    |       |         |             |       |
| 22 |              |                      |       |         |             |       |
| 23 |              | Present              | 0.032 | 0.916   | 1.032       | 0.570 |
| 24 |              |                      |       |         |             | 1.870 |
| 25 |              | Absent               |       |         | <i>Ref.</i> |       |
| 26 |              |                      |       |         |             |       |
| 27 |              |                      |       |         |             |       |
| 28 |              |                      |       |         |             |       |
| 29 |              | Area of residence    |       |         |             |       |
| 30 |              |                      |       |         |             |       |
| 31 |              | Rural area           | 0.379 | 0.014*  | 1.461       | 1.081 |
| 32 |              |                      |       |         |             | 1.975 |
| 33 |              | Urban area           |       |         | <i>Ref.</i> |       |
| 34 |              |                      |       |         |             |       |
| 35 |              | Monthly income (BDT) |       |         |             |       |
| 36 |              |                      |       |         |             |       |
| 37 |              | ≤19,488              | 0.347 | 0.031*  | 1.415       | 1.032 |
| 38 |              |                      |       |         |             | 1.940 |
| 39 |              | >19,488              |       |         | <i>Ref.</i> |       |
| 40 | Group 3A     |                      |       |         |             |       |
| 41 |              | History of trauma    |       |         |             |       |
| 42 |              |                      |       |         |             |       |
| 43 |              | Present              | 1.098 | <0.001* | 2.998       | 2.044 |
| 44 |              |                      |       |         |             | 4.396 |
| 45 |              | Absent               |       |         | <i>Ref.</i> |       |
| 46 |              |                      |       |         |             |       |
| 47 |              | Diabetic Nephropathy |       |         |             |       |
| 48 |              |                      |       |         |             |       |
| 49 |              | Present              | 0.231 | 0.504   | 1.260       | 0.640 |
| 50 |              |                      |       |         |             | 2.482 |
| 51 |              | Absent               |       |         | <i>Ref.</i> |       |
| 52 |              |                      |       |         |             |       |
| 53 |              |                      |       |         |             |       |
| 54 |              |                      |       |         |             |       |
| 55 |              |                      |       |         |             |       |
| 56 | Group 3B     | Age                  |       |         |             |       |
| 57 |              |                      |       |         |             |       |
| 58 |              | ≥50 years            | 0.160 | 0.494   | 1.173       | 0.742 |
| 59 |              |                      |       |         |             | 1.854 |
| 60 |              |                      |       |         |             |       |

|                      |       |         |       |       |             |       |
|----------------------|-------|---------|-------|-------|-------------|-------|
| <50 years            |       |         |       |       | <i>Ref.</i> |       |
| Monthly income (BDT) |       |         |       |       |             |       |
| ≤19,488              | 0.570 | 0.016*  | 1.768 | 1.114 |             | 2.805 |
| >19,488              |       |         |       |       | <i>Ref.</i> |       |
| History of trauma    |       |         |       |       |             |       |
| Present              | 1.133 | <0.001* | 3.104 | 1.810 |             | 5.324 |
| Absent               |       |         |       |       | <i>Ref.</i> |       |
| Diabetic retinopathy |       |         |       |       |             |       |
| Present              | 0.659 | 0.018*  | 1.933 | 1.122 |             | 3.329 |
| Absent               |       |         |       |       | <i>Ref.</i> |       |
| Diabetic nephropathy |       |         |       |       |             |       |
| Present              | 0.871 | 0.024*  | 2.389 | 1.123 |             | 5.083 |
| Absent               |       |         |       |       | <i>Ref.</i> |       |

OR, odd-ratio; CI, confidence interval; Ref, reference; BDT, Bangladesh taka

\*indicates significant

†Group 2B was merged with 2A as the participants were very few in the group 2B

## Discussion

The results show that nearly half (45%) of the T2D subjects were at the risk of DFU and rural population was mostly affected. This is significant as there is no straightforward evidence on the risk of DFU among T2D population of Bangladesh. Moreover, the contributing factors are not yet explored in Bangladesh to take an effective initiative to reduce the burden of associated morbidity and mortality.

In our modified DFU risk classification as per IWGDF, the higher burden was observed in those who had a previous history of foot ulcer (20.6%). This proportion is much higher than an Iranian study that reported only 7% of the study subjects to have a previous history of foot ulceration [20]. The percentage of our finding is also higher than Portugal, where a study reported a previous history of DFU among 16% of study subjects using modified IWGDF risk classification [21]. Although it has been estimated

1  
2  
3 324 that the annual risk of DFU is approximately 2%, this risk in patients with a previous  
4  
5 325 history of foot ulcer is expected to increase to 17%–60% over the next three years [22].  
6

7  
8 326 Several studies have reported the cumulative burden of a previous history of foot ulcer  
9  
10 327 and amputation as a part of their diabetic foot risk assessment. In our study, the  
11  
12 328 cumulative proportion of a previous history of foot ulcer and amputation was 14.3%,  
13  
14 329 which is twice that of studies conducted in India [23,24] and in a half of Portugal [21].  
15  
16 330 A follow-up study from the USA reported nearly three times higher proportion of foot  
17  
18 331 ulcer or amputation compared to our study [25]. In this regard, a systematic review  
19  
20 332 comprised of 41 documents by Hunt et al. [26] found that a person with a previous  
21  
22 333 history of DFU has a 66% chance of ulcer recurrence and 12% chance of amputation  
23  
24 334 over five years.

25  
26 335 We have mentioned earlier that PN is one of the major risk factors for DFU. In our  
27  
28 336 study, 4.2% of the T2D subjects had only PN and 11.6% had PN with deformity,  
29  
30 337 represented as group 1 and group 2A respectively. This finding has much lower  
31  
32 338 percentages compared to similar studies conducted among subjects of India [23,27–  
33  
34 339 28] and Iran [20,28]. However, this burden is still higher than Portugal [21]. Our study  
35  
36 340 classified very low proportion of T2D subjects as having PAD compared to  
37  
38 341 aforementioned studies [20–23,27–29]. A possible reason for the ABI being above 0.80  
39  
40 342 in the majority of patients is the presence of medial arterial calcification artefactually  
41  
42 343 raising the ankle pressure. Another reason might be due to the cut-off value applied  
43  
44 344 to define PAD. The compared studies used ABI 0.9 or less as the cut-off, which included  
45  
46 345 more participants as PAD compared to current study. The overall burden of ‘at risk’  
47  
48 346 (other than group 0) T2D subjects of this study was also lower than the findings from  
49  
50 347 India [27–28] and Portugal [21]. However, the proportion of ‘at risk’ subjects is more  
51  
52 348 than twice that of aforementioned Indian [23] and Iranian [20] studies. The reasons for  
53  
54 349 the risk difference in different countries are still unclear.

55  
56  
57 350 A study by Abott et al. explored this risk difference among different ethnic population  
58  
59 351 including South-Asians, African-Caribbeans and Europeans of the United Kingdom  
60

1  
2  
3 352 [11]. They reported that such difference might be due to the methods applied to detect  
4  
5 353 neuropathy, provisions of primary health care services, such as diabetes mini-clinics,  
6  
7 354 podiatric care and referrals for special footwear for the health care districts and a  
8  
9 355 variable quality of health care. Regarding the burden of risk factors of DFU, Abbott et  
10  
11 356 al. added that lower level of PN and PAD also contribute to the less percentage of  
12  
13 357 South-Asian population 'at risk' compared to Europeans. Another reason behind this  
14  
15 358 difference is the application of various risk classification system in different countries.  
16  
17 359 We used modified IWGDF risk classification, similar to the studies from Iran [20] and  
18  
19 360 Portugal [21], whereas one of the two Indian [23] studies used semi-structured pre-  
20  
21 361 tested questionnaire and another [27] applied American Diabetic Association (ADA)  
22  
23 362 task force report for comprehensive foot examination risk classification.

24  
25  
26 363 Our study reports a sex-specific and area-specific difference in risk of DFU among T2D  
27  
28 364 population of Bangladesh. The overall proportion of DFU risk was higher among men  
29  
30 365 than women. Previous studies [7,20,23,30] have also reported similar findings.  
31  
32 366 However, a community-based study from India reported that DFU risk was high in  
33  
34 367 women [24], which is contradictory to our finding.

35  
36 368 Our study shows that the risk of DFU is greater among men with a previous history of  
37  
38 369 ulcer or amputation. This higher risk of foot ulcer history or amputation in men was  
39  
40 370 also supported by a study from Iran, which used IWGDF risk classification system [20].  
41  
42 371 This men-to-women risk difference might be due to diabetes-related healthy  
43  
44 372 behavioural practice, health-seeking behaviour and self-care. In this regard, a Brazilian  
45  
46 373 study reported that sex is significantly associated with changes of lifestyle behaviour  
47  
48 374 related to control of T2D, foot self-care and prevention of ulceration, and women were  
49  
50 375 found to adhere more to lifestyle changes than men [31]. The same study also reported  
51  
52 376 that men were highly reluctant to check their glycaemic status and lipid profile  
53  
54 377 compared to women [31]. In this case, the fact is that women are more sensitive to  
55  
56 378 health issues and more frequently seek health services than men do [32,33].

57  
58  
59 379 For the urban–rural difference, we found that the risk was higher among those who  
60

1  
2  
3 380 lived in a rural area. This finding is also supported by other studies [23,28,34]. A  
4  
5 381 possible explanation is that diabetic patients of rural area are not aware of their PN  
6  
7 382 due to illiteracy, especially their lack of knowledge about diabetic foot-related  
8  
9 383 complications. They walk barefoot and this leads to an injury to the foot and  
10  
11 384 subsequent complications [35]. Another explanation could be that people in rural areas  
12  
13 385 often sleep in huts or farmhouses where rodents are common; rodents bite their feet  
14  
15 386 and in case of patients with diabetes, this can lead to chronic ulcers [34].

17  
18 387 One of the major objectives of this study was to identify the factors that influenced the  
19  
20 388 risk of DFU among Bangladeshi T2D population. Sociodemographic factors age  $\geq 50$   
21  
22 389 years, living in a rural area and monthly income  $\leq 19,488$  BDT showed higher odds for  
23  
24 390 the risk of DFU. In diabetic research, age is widely evaluated as an associated factors  
25  
26 391 of DFU. Some other studies also found age as a significant risk factors [36–38] of DFU.  
27  
28 392 In our study, it was found that age below 50 years was a protective factor and age  
29  
30 393 above this was associated with development of DFU. This has also been supported by  
31  
32 394 the other studies that reported older age was a significant factor [37,38].

33  
34 395 Globally, the findings of the association of economic status and area of residence with  
35  
36 396 the risk of DFU are inconsistent. Our results show that lower economic status (monthly  
37  
38 397 income  $\leq 19,488$  BDT) and living in a rural area are strongly associated with the risk of  
39  
40 398 DFU. These findings were consistent with the results of other studies conducted in  
41  
42 399 India [24,27] and Sri Lanka [39]. It was postulated that financial status is directly related  
43  
44 400 to burden of risk factors, which leads to complications of chronic diseases. This is  
45  
46 401 because a lack of financial resources interferes with the access to healthcare services,  
47  
48 402 options of treatments and hinders the adoption of preventive measures that are  
49  
50 403 necessary to avoid amputations [31]. Regarding place of residence, significant urban–  
51  
52 404 rural risk difference for DFU was explained by the study of Viswanathan et al. [34] and  
53  
54 405 we mentioned it in this section previously. However, one study has reported no  
55  
56 406 association for the aforementioned factors [40].

57  
58  
59 407 Our study found that the odds for risk of DFU were higher among insulin users, having  
60



1  
2  
3 408 diabetic-related complications as nephropathy and retinopathy. Previous studies also  
4  
5 409 reported that use of insulin is a contribution factor of diabetic foot [29,41]. However,  
6  
7 410 the exact mechanism behind this has not yet been explored and this finding is thus  
8  
9 411 inconclusive. It might be possible that when patients acquiesce to start insulin, they  
10  
11 412 may already have diabetes for a long time with greater associated complications [29].  
12  
13  
14 413 Our findings of retinopathy and nephropathy are also supported by other studies  
15  
16 414 [20,38,42,43]. Regarding nephropathy, we found that about 10% of diabetic patients  
17  
18 415 had a history of amputation when they entered a dialysis program [44]. Several factors  
19  
20 416 might be responsible for an increased risk of DFU among nephropathy patients.  
21  
22 417 Coexistence of PN, peripheral vascular diseases, susceptibility to infection, minimal  
23  
24 418 self-care, dialysis therapy and anaemia [45]. On the other hand, one study has reported  
25  
26 419 that the prevalence of diabetic retinopathy is much higher (90%) among patients with  
27  
28 420 DFU than those who had no DFU [42]. Another study [43] used IWGDF risk classification  
29  
30 421 to predict DFU and they found that around 67.58% of patients had diabetic retinopathy  
31  
32 422 and they were included in the risk group 3, which was similar to our study. In this  
33  
34 423 regard, a systematic review and a meta-analysis show that both retinopathy and  
35  
36 424 nephropathy are microvascular complications. The impairment of microcirculation in  
37  
38 425 T2D may lead to secondary complications in lower extremity due to dysfunctional  
39  
40 426 vasodilatation. Moreover, patients of diabetic foot with retinopathy have higher level  
41  
42 427 of diabetic biomarkers like ceruloplasmin. Again, this ceruloplasmin is an independent  
43  
44 428 predictor of progression of diabetic nephropathy in T2D patients. Thus  
45  
46 429 aforementioned explanation implies a link between DFU, and retinopathy and  
47  
48 430 nephropathy [46].

49  
50 431 Previous history of trauma was identified as a significant contributing factor of DFU  
51  
52 432 (group 3A, OR 2.998,  $p < 0.001$ ; group 3B,  $p < 0.001$ ) in our study. This finding was  
53  
54 433 similar to other studies that reported a significant association between a previous  
55  
56 434 history of trauma and DFU [47–49]. However, the exact mechanism of a previous  
57  
58 435 trauma leading to DFU is not clear. As such, further research on this issue is required.  
59  
60

## 436 **Limitations**

437 Our study has some limitations that should be mentioned. First, the participating  
438 centres were not representative of the Bangladesh diabetes centres as a whole  
439 considering their geographical distribution as some areas were underrepresented or  
440 not represented at all. Therefore, the results of our study cannot be extrapolated to  
441 the general diabetic population in Bangladesh. Second, in our study some diabetes-  
442 related complications were underrepresented, especially for diabetic retinopathy and  
443 nephropathy. These co-morbidities were not based on real-time clinical examination  
444 of eyes and assessment of kidney functions, rather based on diabetic record books  
445 review. As a result, the exact cut-off value used to define both of these co-morbidities  
446 were uncertain. In a similar way, glycaemic status was evaluated using the values  
447 previously recorded in the diabetic records of the subject instead of using a  
448 biochemical measurement during data collection.

## 449 **Strengths**

450 Our study is important from the public health and clinical perspective. It is the first  
451 study in Bangladesh that assessed DFU risk in a moderately large sample of T2D  
452 population. Moreover, a multi-centric study recruited participants from world-  
453 renowned DAB affiliated diabetes centres. The other strength of this study is sex- and  
454 area-specific reporting of DFU risk among the study subjects. This difference will help  
455 to address the men–women and urban–rural disparities in diabetes foot care in  
456 Bangladesh and in remodelling the chain of diabetes centres where appropriate. The  
457 clinicians of Bangladesh should concentrate more on the contributing factors of DFU  
458 in the management of diabetic patients as these are associated with morbidity and  
459 mortality resulting from DFU.

## 460 **Conclusion**

461 We found that a significant proportion of T2D population of Bangladesh is at a high  
462 risk of DFU. The findings indicate that each diabetic patient must be screened for his  
463 or her foot ulcer risk factors according to IWGDF recommendation. In this regard,

1  
2  
3 464 diabetic foot screening program can be introduced in the primary health care system  
4  
5 465 of Bangladesh. Based on the findings of this study, we also recommend that specialized  
6  
7 466 diabetic foot care centres should be established in both urban and rural areas to stop  
8  
9 467 the debilitating consequences of DFU.  
10

## 11 468 **Funding**

12  
13  
14 469 This study was funded by the Norwegian Award for Masters Studies (NOMA) through  
15  
16 470 University of Oslo, Norway, awarded to the Bangladesh Institute of Health Sciences,  
17  
18 471 Bangladesh.  
19

## 20 472 **Conflicts of Interest**

21  
22  
23  
24 473 All authors have none to declare.  
25

## 26 474 **Data statement**

27  
28  
29 475 Data are available as a supplementary file. All data relevant to the study are included  
30  
31 476 in the article.  
32

## 33 477 **Author statement**

34  
35  
36 478 Conceptualization, PCB, FZ, MM and LA; Data curation, PCB, FZ and RM; Data analysis,  
37  
38 479 PCB, LB, MM and RM; Interpretation; LB, FZ, MM, RM and LA; Writing – original draft,  
39  
40 480 LB; Writing—review and editing, PCB, LB, MM and LA; All authors read and approved  
41  
42 481 the final manuscript.  
43

## 44 482 **Acknowledgments**

45  
46  
47  
48 483 The authors would like to thank the Head of the Department of Community Medicine,  
49  
50 484 Prof. Dr MSA Mansur Ahmed for his kind cooperation in conducting the study and are  
51  
52 485 grateful to Diabetic Association of Bangladesh (DAB) for allowing data collection from  
53  
54 486 their chain diabetes care centres.  
55

## 56 487 **References**

57  
58  
59 488 1. Wild S, Roglic G, Green A, Sicree R, King H. Global prevalence of diabetes:  
60

- 1  
2  
3 489 estimates for the year 2000 and projections for 2030. *Diabetes Care*.  
4 2004;**27**(5):1047–1053. doi:10.2337/diacare.27.5.1047  
5 490  
6  
7  
8 491 2. Ogurtsova K, da Rocha Fernandes J, Huang Y et al. IDF diabetes atlas: global  
9 estimates for the prevalence of diabetes for 2015 and 2040. *Diabetes Res Clin*  
10 492 *Pract*. 2017;**128**:40–50. doi:10.1016/j.diabres.2017.03.024  
11 493  
12  
13  
14 494 3. Hutchinson A, McIntosh A, Feder G, Home PD, et al. (2000) *Clinical Guidelines*  
15 *and Evidence Review for Type 2 Diabetes: Prevention and Management of Foot*  
16 495 *Problems*. London: Royal College of General Practitioners. Available from:  
17 496 www.rcgp.org.uk/clinspec/guidelines/diabetes/contents.asp  
18 497  
19  
20  
21 498 4. Akter S, Rahman M, Abe S, Sultana P. Prevalence of diabetes and prediabetes  
22 499 and their risk factors among Bangladeshi adults: a nationwide survey. *Bull*  
23 *World Health Organ*. 2014;**92**(3):204–213A. doi:10.2471/blt.13.128371  
24 500  
25  
26  
27 501 5. Saquib N, Saquib J, Ahmed T, Khanam M, Cullen M. Cardiovascular diseases  
28 502 and type 2 diabetes in Bangladesh: a systematic review and meta-analysis of  
29 503 studies between 1995 and 2010. *BMC Public Health*. 2012;**12**(1).  
30 504 doi:10.1186/1471-2458-12-434  
31  
32  
33 505 6. Karthikesalingam A, Holt P, Moxey P, Jones K, Thompson M, Hinchliffe R. A  
34 506 systematic review of scoring systems for diabetic foot ulcers. *Diabetic Medicine*.  
35 507 2010;**27**(5):544–549. doi:10.1111/j.1464-5491.2010.02989.x  
36  
37  
38  
39 508 7. Eleftheriadou I, Tsapogas P, Tentolouris A et al. *Atlas of the Diabetic Foot*.  
40 509 Malden, MA: Wiley-Blackwell; 2019.  
41  
42  
43 510 8. Diabetic foot ulcers ,Äî effects on QOL, costs, and mortality and the role of  
44 511 standard wound care and advanced-care therapies. *Wound management &*  
45 512 *prevention*. [https://www.o-wm.com/content/diabetic-foot-ulcers-effects-qol-](https://www.o-wm.com/content/diabetic-foot-ulcers-effects-qol-costs-and-mortality-and-role-standard-wound-care-and-adva)  
46 513 [costs-and-mortality-and-role-standard-wound-care-and-adv](https://www.o-wm.com/content/diabetic-foot-ulcers-effects-qol-costs-and-mortality-and-role-standard-wound-care-and-adva). Published  
47 514 2019. Accessed June 11 November 13, 2019.  
48  
49  
50  
51  
52  
53  
54  
55  
56  
57  
58  
59  
60

- 1  
2  
3 515 9. Boyko E, Ahroni J, Smith D, Davignon D. Increased mortality associated with  
4  
5 516 diabetic foot ulcer. *Diabetic Medicine*. 1996;**13**(11):967–972.  
6  
7 517 doi:10.1002/(sici)1096-9136(199611)13:11<967::aid-dia266>3.3.co;2-b  
8  
9  
10 518 10. Boulton A, Armstrong D, Albert S et al. Comprehensive foot examination and  
11  
12 519 risk assessment. *Endocrine Practice*. 2008;**14**(5):576–583.  
13  
14 520 doi:10.4158/ep.14.5.576  
15  
16 521 11. Abbott C, Garrow A, Carrington A, Morris J, Van Ross E, Boulton A. Foot ulcer  
17  
18 522 risk is lower in South-Asian and African-Caribbean compared with European  
19  
20 523 diabetic patients in the U.K.: the North-West diabetes foot care study. *Diabetes*  
21  
22 524 *Care*. 2005;**28**(8):1869–1875. doi:10.2337/diacare.28.8.1869  
23  
24  
25 525 12. Chaturvedi N, Stevens L, Fuller J, Lee E, Lu M. Risk factors, ethnic differences  
26  
27 526 and mortality associated with lower-extremity gangrene and amputation in  
28  
29 527 diabetes. The WHO multinational study of vascular disease in diabetes.  
30  
31 528 *Diabetologia*. 2001;**44**(S2):S65–S71. doi:10.1007/pl00002941  
32  
33 529 doi:10.1007/pl00002941  
34  
35 530 13. Mørkrid K, Ali L, Hussain A. Risk factors and prevalence of diabetic peripheral  
36  
37 531 neuropathy: a study of type 2 diabetic outpatients in Bangladesh. *Int J Diabetes*  
38  
39 532 *Dev Ctries*. 2010;**30**(1):11. doi:10.4103/0973-3930.60004  
40  
41  
42 533 14. Bonita R. *Surveillance of Risk Factors for Noncommunicable Diseases: The WHO*  
43  
44 534 *Stepwise Approach: Summary*. Geneva: Noncommunicable Disease and Mental  
45  
46 535 Health, World Health Organization; 2001.  
47  
48 536 15. Non-communicable disease risk factor survey, Bangladesh 2010. Who.int.  
49  
50 537 [https://www.who.int/ncds/surveillance/steps/2010\\_STEPS\\_Report\\_Bangladesh.](https://www.who.int/ncds/surveillance/steps/2010_STEPS_Report_Bangladesh.pdf)  
51  
52 538 pdf. Published 2011  
53  
54  
55 539 16. Lavery L, Peters E, Williams J, Murdoch D, Hudson A, Lavery D. Reevaluating the  
56  
57 540 way we classify the diabetic foot: restructuring the diabetic foot risk  
58  
59 541 classification system of the International Working Group on the Diabetic Foot.  
60

- 1  
2  
3 542 *Diabetes Care*. 2007;**31**(1):154–156. doi:10.2337/dc07-1302.doi:10.2337/dc07-  
4 543 1302  
5  
6  
7  
8 544 17. Lavery L, Armstrong D, Vela S, Quebedeaux T, Fleischli J. Practical criteria for  
9 screening patients at high risk for diabetic foot ulceration. *Arch Intern Med*.  
10 545 1998;**158**(2):157. doi:10.1001/archinte.158.2.157  
11 546  
12  
13  
14 547 18. Sibbald RG, Ayello EA, Alavi A, et al. Screening for the high-risk diabetic foot.  
15 *Advances in Skin & Wound Care* 2012;**25**:465–76.  
16 548 doi:10.1097/01.asw.0000421460.21773.7b  
17 549  
18  
19  
20  
21 550 19. Lavery L, Armstrong D, Murdoch D, Peters E, Lipsky B. Validation of the  
22 Infectious Diseases Society of America's diabetic foot infection classification  
23 551 system. *Clinical Infectious Diseases*. 2007;**44**(4):562–565.  
24 552 doi:10.1086/511036.doi:10.1086/511036  
25 553  
26  
27  
28  
29 554 20. Shahbazian H, Yazdanpanah L, Latifi S. Risk assessment of patients with  
30 diabetes for foot ulcers according to risk classification consensus of  
31 555 international working group on diabetic foot (IWGDF). *Pak J Med Sci*.  
32 556 2013;**29**(3). doi:10.12669/pjms.293.3473  
33 557  
34  
35  
36  
37  
38 558 21. Monteiro-Soares M, Vaz-Carneiro A, Sampaio S, Dinis-Ribeiro M. Validation  
39 and comparison of currently available stratification systems for patients with  
40 559 diabetes by risk of foot ulcer development. *Eur J Endocrinol*. 2012;**167**(3):401–  
41 560 407. doi:10.1530/eje-12-0279  
42 561  
43  
44  
45  
46 562 22. Dubský M, Jirkovská A, Bem R et al. Risk factors for recurrence of diabetic foot  
47 ulcers: prospective follow-up analysis in the Eurodiale subgroup. *Int Wound J*.  
48 563 2012;**10**(5):555–561. doi:10.1111/j.1742-481x.2012.01022.x  
49 564  
50  
51  
52  
53 565 23. Naik BN, Srinivasan M, Reddy MM, Kanungo S, Sarkar S, Kar SS. Diabetes foot  
54 ulcer risk: a public health concern in rural Pondicherry!! *National Journal of*  
55 566 *Community Medicine*. 2018;**9**:755–9.  
56 567  
57  
58  
59 568 24. Vibha S, Kulkarni M, Kirthinath Ballala A, Kamath A, Maiya G. Community based  
60

- 1  
2  
3 569 study to assess the prevalence of diabetic foot syndrome and associated risk  
4  
5 570 factors among people with diabetes mellitus. *BMC Endocr Disord*. 2018;**18**(1).  
6  
7 571 doi:10.1186/s12902-018-0270-2  
8  
9  
10 572 25. Peters E, Lavery L. Effectiveness of the diabetic foot risk classification system of  
11  
12 573 the International Working Group on the Diabetic Foot. *Diabetes Care*.  
13  
14 574 2001;**24**(8):1442–1447. doi:10.2337/diacare.24.8.1442  
15  
16 575 26. Hunt, D. Diabetes: foot ulcers and amputations. *BMJ Clinical Evidence* 2009.  
17  
18  
19 576 27. Jyotsna V, Kishore S, Upadhyay A. Categories of foot at risk in patients of  
20  
21 577 diabetes at a tertiary care center: insights into need for foot care. *Indian J*  
22  
23 578 *Endocrinol Metab*. 2015;**19**(3):405. doi:10.4103/2230-8210.152789  
24  
25 579 28. A C, Valame S. Diabetic foot risk assessment and foot care among patients  
26  
27 580 attending tertiary care hospital in central India. *J Evol Med Dent Sci*.  
28  
29 581 2017;**6**(72):5153–5158. doi:10.14260/jemds/2017/1119  
30  
31  
32 582 29. Yazdanpanah L, Shahbazian H, Nazari I et al. Incidence and risk factors of  
33  
34 583 diabetic foot ulcer: a population-based diabetic foot cohort (ADFC study)—  
35  
36 584 two-year follow-up study. *Int J Endocrinol*. 2018;2018:1–9.  
37  
38 585 doi:10.1155/2018/7631659  
39  
40 586 30. Kumar M, Valame S. Risk of diabetic foot in diabetics with micro and  
41  
42 587 macrovascular complications. *J Evol Med Dent Sci*. 2014;**3**(67):14467–14477.  
43  
44 588 doi:10.14260/jemds/2014/3941.  
45  
46  
47 589 31. Rossaneis M, Haddad M, Mathias T, Marcon S. Differences in foot self-care and  
48  
49 590 lifestyle between men and women with diabetes mellitus. *Rev Lat Am*  
50  
51 591 *Enfermagem*. 2016;**24**(0). doi:10.1590/1518-8345.1203.2761  
52  
53 592 32. Mansyur C, Rustveld L, Nash S, Jibaja-Weiss M. Social factors and barriers to  
54  
55 593 self-care adherence in Hispanic men and women with diabetes. *Patient Educ*  
56  
57 594 *Couns*. 2015;**98**(6):805–810. doi:10.1016/j.pec.2015.03.001  
58  
59 595 33. Tang Z, Chen H, Zhao F. Gender differences of lower extremity amputation risk  
60

- 1  
2  
3 596 in patients with diabetic foot. *Int J Low Extrem Wounds*. 2014;**13**(3):197–204.  
4  
5 597 doi:10.1177/1534734614545872  
6  
7  
8 598 34. 5. Viswanathan V, Madhavan S, Rajasekar S, Chamukuttan S, Ambady R. Urban-  
9  
10 599 rural differences in the prevalence of foot complications in South-Indian  
11  
12 600 diabetic patients. *Diabetes Care*. 2006;**29**(3):701–703.  
13  
14 601 doi:10.2337/diacare.29.03.06.dc05-1777  
15  
16 602 35. Vijay V, Snehalata C, Ramachandran A. Socio cultural practices that may affect  
17  
18 603 the development of the diabetic foot. *IDF Bulletin*. 1997;**42**(4):10–13.  
19  
20  
21 604 36. Armstrong D, Holtz-Neiderer K, Wendel C, Mohler M, Kimbriel H, Lavery L. Skin  
22  
23 605 temperature monitoring reduces the risk for diabetic foot ulceration in high-  
24  
25 606 risk patients. *Am J Med*. 2007;**120**(12):1042–1046.  
26  
27 607 doi:10.1016/j.amjmed.2007.06.028  
28  
29 608 37. 2. Monami M, Vivarelli M, Desideri C, Colombi C, Marchionni N, Mannucci E.  
30  
31 609 Pulse pressure and prediction of incident foot ulcers in type 2 diabetes.  
32  
33 610 *Diabetes Care*. 2009;**32**(5):897–899. doi:10.2337/dc08-1679  
34  
35  
36 611 38. Margolis D, Hofstad O, Feldman H. Association between renal failure and foot  
37  
38 612 ulcer or lower-extremity amputation in patients with diabetes. *Diabetes Care*.  
39  
40 613 2008;**31**(7):1331–1336. doi:10.2337/dc07-2244  
41  
42 614 39. Sriyani K, Wasalathanthri S, Hettiarachchi P, Prathapan S. Predictors of diabetic  
43  
44 615 foot and leg ulcers in a developing country with a rapid increase in the  
45  
46 616 prevalence of diabetes mellitus. *PLoS ONE*. 2013;**8**(11):e80856.  
47  
48 617 doi:10.1371/journal.pone.0080856  
49  
50  
51 618 40. Sriussadaporn S, Mekanandha P, Vannasaeng S et al. Factors associated with  
52  
53 619 diabetic foot ulceration in Thailand: a case-control study. *Diabetic Medicine*.  
54  
55 620 1997;**14**(1):50–56. doi:10.1002/(sici)1096-9136(199701)14:1<50::aid-  
56  
57 621 dia292>3.0.co;2-6  
58  
59  
60



- 1  
2  
3 622 41. Monteiro-Soares M, Boyko E, Ribeiro J, Ribeiro I, Dinis-Ribeiro M. Predictive  
4 factors for diabetic foot ulceration: a systematic review. *Diabetes Metab Res Rev.*  
5 623 *2012;28(7):574–600. doi:10.1002/dmrr.2319*  
6  
7 624  
8  
9  
10 625 42. Hwang D, Lee K, Park M et al. Association between diabetic foot ulcer and  
11 diabetic retinopathy. *PLoS ONE.* 2017;**12(4):e0175270.  
12 626 *doi:10.1371/journal.pone.0175270*  
13 627  
14  
15  
16 628 43. Kamath Y, Karam T, Rao L, Rao K, Shenoy S, Bhandary S. Diabetic retinopathy  
17 in patients with diabetic foot syndrome in South India. *Indian J Ophthalmol.*  
18 629 *2018;66(4):547. doi:10.4103/ijo.ijo\_1000\_17*  
19 630  
20  
21  
22  
23 631 44. 9. Papanas N, Liakopoulos V, Maltezos E, Stefanidis I. The diabetic foot in end  
24 stage renal disease. *Ren Fail.* 2007;**29(5):519–528.  
25 632 *doi:10.1080/08860220701391662*  
26 633  
27  
28  
29 634 45. 10. Valabhji J. Foot problems in patients with diabetes and chronic kidney  
30 disease. *J Ren Care.* 2012;**38:99–108. doi:10.1111/j.1755-6686.2012.00284.x  
31 635  
32  
33  
34 636 46. Zhang P, Lu J, Jing Y, Tang S, Zhu D, Bi Y. Global epidemiology of diabetic foot  
35 ulceration: a systematic review and meta-analysis. *Ann Med.* 2016;**49(2):106–**  
36 637 **116. doi:10.1080/07853890.2016.1231932**  
37 638  
38  
39  
40 639 47. 13. Nongmaithem M, Bawa A, Pithwa A, Bhatia S, Singh G, Gooptu S. A study  
41 of risk factors and foot care behavior among diabetics. *J Family Med Prim Care.*  
42 640 *2016;5(2):399. doi:10.4103/2249-4863.192340*  
43 641  
44  
45  
46  
47 642 48. Sharma D, Sharma D, Gothwal D, Dixit D, Lunia D, Sharma D. Diabetic foot  
48 ulcers: a prospective study of 100 patients based on wound based severity  
49 643 score. *IOSR Journal of Dental and Medical Sciences.* 2014;**13(1):79–89.**  
50 644 *doi:10.9790/0853-13187989*  
51 645  
52  
53  
54  
55 646 49. Nyamu P, Otieno C, Amayo E, Mcligeyo S. Risk factors and prevalence of  
56 diabetic foot ulcers at Kenyatta National Hospital, Nairobi. *East Afr Med J.*  
57 647 *2004;80(1). doi:10.4314/eamj.v80i1.8664*  
58 648  
59  
60******

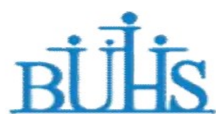

# BANGLADESH UNIVERSITY OF HEALTH SCIENCES

**Faculty of Public Health**  
**Department of Noncommunicable Diseases (NCD)**

## TRAINING MODULE ON DETECTION OF DIABETIC FOOT PROBLEM AT THE EARLY STAGE

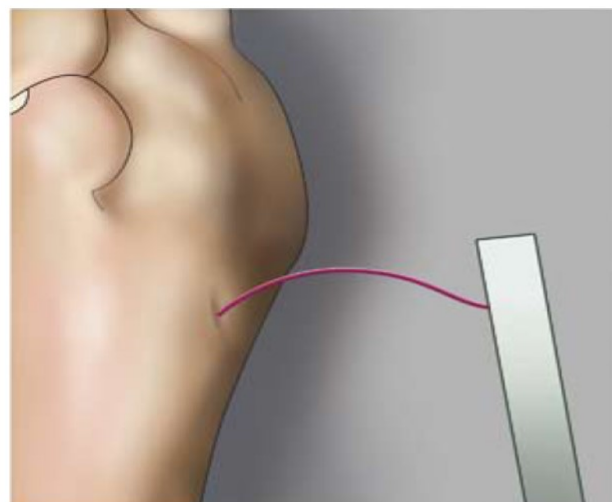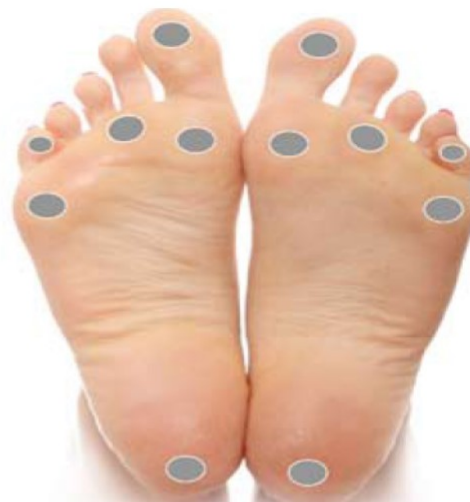

By

Palash Chandra Banik, Nirmalandu Bikash Bhowmik and Professor Liaquat Ali

March 2017

[www.buhs.ac.bd](http://www.buhs.ac.bd)

Collaboration with

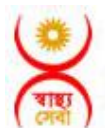

Health Care Development Project (HCDP) of BADAS

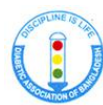

Diabetic Association of Bangladesh

**Bangladesh University of Health Sciences (BUHS)**

125/1, Darus Salam, Mirpur-1, Dhaka-1216, Bangladesh.

Phone: 00 880 2 9010952; 9010932

*Table of Content*

| SI No | List of contents                                  | Page  |
|-------|---------------------------------------------------|-------|
| 01    | Introduction                                      | 03    |
| 02    | Objectives                                        | 03    |
| 03    | Screening for high risk patient: overview         | 04    |
| 04    | Screening for high risk patient: Sensation        | 05    |
| 05    | Screening for high risk patient: Foot Deformities | 09-13 |
| 06    | Screening for high risk patient: Vascular         | 13-15 |
| 07    | Screening for high risk patient: Foot mobility    | 16-17 |

## Acknowledgement to

1. **Dr. Farhana Zaman**, MBBS, MPH (CM) Sr Lecturer, Department of Community Medicine, Bangladesh Institute of Health Sciences (BIHS).
2. **Md. Moniruzzaman**, Sr Research Fellow, Department of Community Medicine, Bangladesh Institute of Health Sciences (BIHS).

## **Introduction**

### **Why foot care is important for patients with Type 2 Diabetes?**

Foot problems from diabetes represent a significant burden of care for primary care physicians. Most of the adverse outcomes of a diabetic foot are preventable with resources currently available in primary care settings where most patients with diabetes get their care.

#### **The Center for Disease Control estimates that in 2010:**

- 1 in 12 adults Americans, and 1 in 4 adult American Indians, has diabetes.
- Approximately 90% of these patients are managed by primary care providers.
- Of the diabetes patients seen, 20% will present with an acute foot problem.
- Over the course of their care, 15% will experience a foot ulcer.
- 5 – 10% will need lower limb amputation.
- 50% of those who get an amputation die within 5 years.

### **How is this training set up?**

#### **This Training can be used in a variety of different ways:**

- Read the Essential Elements that offer a detailed explanation.
- Just want the key points? Then browse through the Quick Facts.
- Use these printable notes if you want to be able to write alongside the information offered.

Feel free to use any of these avenues to better enhance your learning needs.

### **Objectives:**

#### **At the end of this training, you will be able to:**

1. List four risk factors for diabetic foot complications.
2. Be able to conduct a complete diabetic foot exam.

## Screening for High Risk Patients: Overview

Foot ulceration and amputation are preventable with resources currently available in primary care settings where most patients with diabetes get their care. There are several principle risk factors for ulceration and lower extremity amputation (LEA) among patients with diabetes:

- Neuropathy
- Deformity
- Limited joint mobility
- Prior ulcer/ LEA
- PVD
- Onychomycosis

**It is also important to assess non-foot related risk factors; some of them are potentially modifiable:**

- Male sex
- Duration of diabetes
- Age
- Hyperglycemia
- Hypertension
- Dyslipidemia
- Smoking
- Poor vision
- Other complications such as renal disease

Patients at high risk for foot ulcer and amputation can be identified with simple criteria that involve several testing and inspection measures. Patients with all normal criteria are at low-risk, while those with insensitivity, deformity, absent pulses, or prior foot ulcers or amputations are at high-risk. These simple criteria have been validated in Indian Health Services (IHS) and adopted by most professional and public health organizations including the American Diabetes Association (ADA) and World Health Organization (WHO).

- Sensory testing with a 10 gram monofilament
- Foot inspection for deformity
- Reports of prior ulcer or amputation
- Checking for pedal pulses and taking measurements for an ABI pressure
- Checking joint mobility with goniometer

## Screening for High Risk Patients: Sensation

A test using a 10 g monofilament is the recommended method for assessing for neuropathy of the foot. Loss of protective sensation at any site on the foot indicates evidence of neuropathy, increasing the risk of ulceration and other complications.

**Equipment:** 10 g monofilament

Monofilament is the test used to help identify high risk feet in people with diabetes. The monofilament exam involves using a 10 gram monofilament to test sensation on the tip of the great toe, little figure and 1st, 3rd and 5th metatarsal heads & heel of each foot.

**The technique for monofilament testing is as follows:**

### Directions for use of Semmes- Weinstein Monofilament

1. Assess integrity of monofilament (no bends/breaks).
2. Show the monofilament to the patient. Place the end of the monofilament on his/her hand or arm to show that the testing procedure will not hurt.
3. Ask the patient to turn his/her head and close his/her eyes or look at the ceiling.
4. Hold the monofilament perpendicular to the skin.

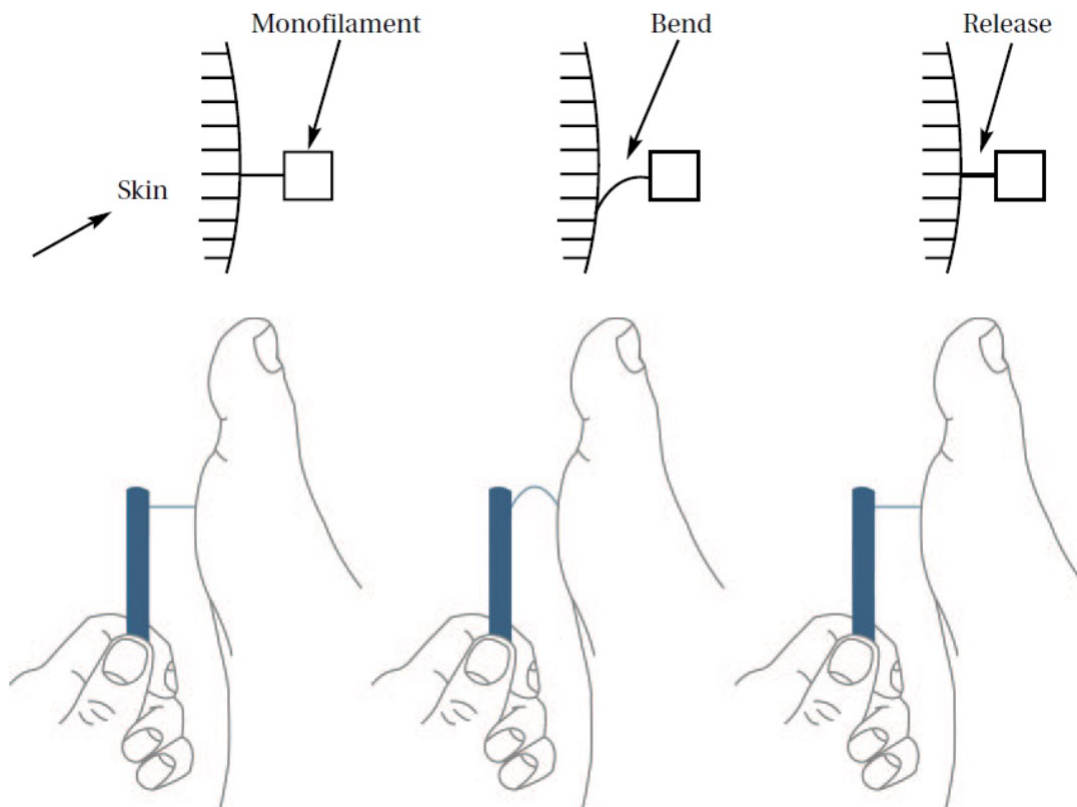

5. Place the end of the monofilament on the sole of the foot. Ask the patient to say 'yes' when he/she feels you touching his/her foot with the monofilament. DO NOT ASK THE PATIENT "did you feel that?" If the patient does not say "yes" when you touch a given testing site, continue on to another site. When you have completed the sequence RETEST the area(s) where the patient did not feel monofilament.

6. Push the monofilament until it bends, then hold for 1-3 seconds.

7. Lift the monofilament from the skin. Do not brush or slide along the skin.

8. Repeat the sequence randomly at each testing site on the foot (see pictures below).

### Sites on the sole of the foot for monofilament testing

Loss of protective sensation = absent sensation at one or more sites

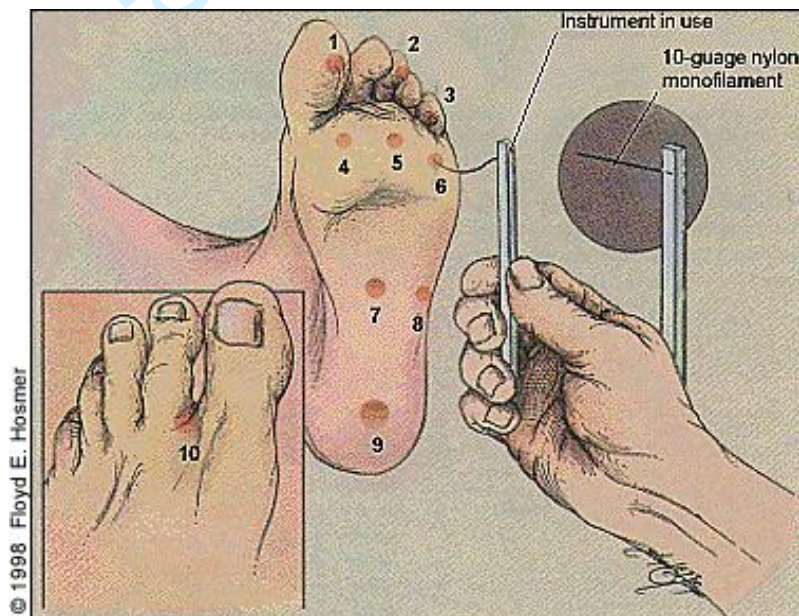

Using the monofilament, test the sites listed. Do not test over heavy callus.

- digits: 1st, 3rd, 5th
- MTH: 1st, 3rd, 5th
- midfoot: Medial, Lateral
- heel
- top (dorsum) of foot

#### **N. B.:**

Apply only to intact skin. Avoid calluses, ulcerated or scarred areas. DO NOT use a rapid or tapping movement.

- If the monofilament accidentally slides along the skin, re-test that area later in the testing sequence.



- 1
- 2
- 3 ■ Store the monofilament according to the manufacturer's instructions.
- 4 ■ Clean the monofilament according to agency infection control protocols.
- 5 ■ The filament should be cleaned after use with an alcohol swab or dilute bleach
- 6 solution and returned to its case.
- 7
- 8 ■ Do not apply the filament directly on an ulcer, callous, scar or necrotic tissue.
- 9 Apply the filament on near-by normal tissue.
- 10
- 11
- 12
- 13
- 14
- 15
- 16
- 17
- 18
- 19
- 20
- 21
- 22
- 23
- 24
- 25
- 26
- 27
- 28
- 29
- 30
- 31
- 32
- 33
- 34
- 35
- 36
- 37
- 38
- 39
- 40
- 41

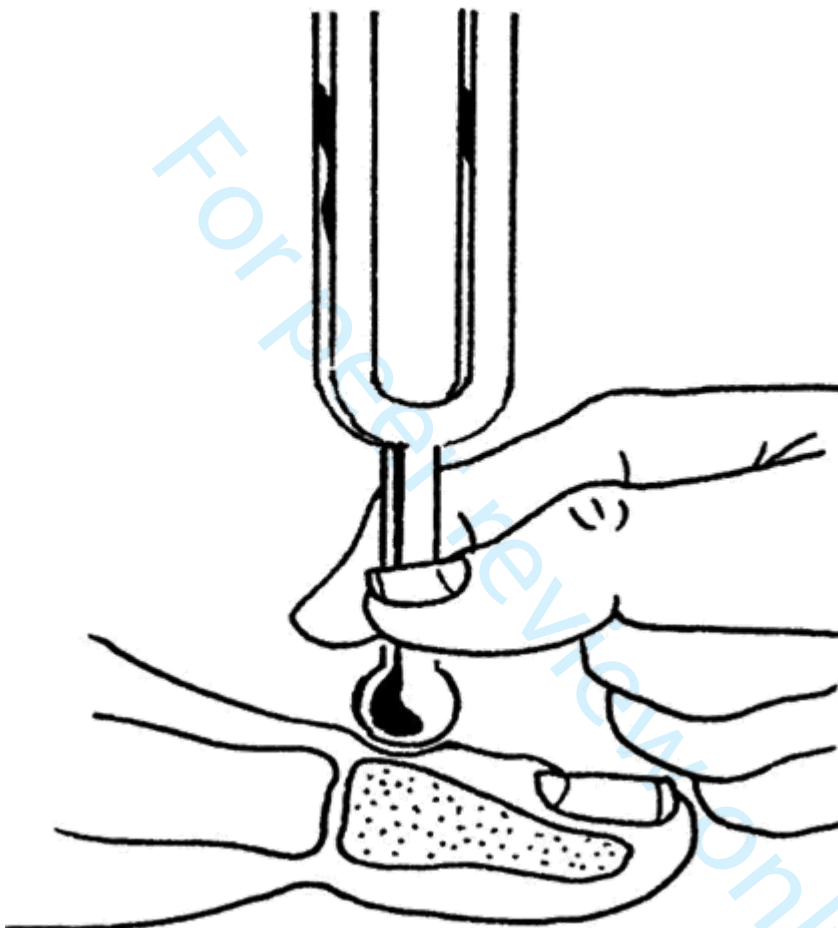

### 42 **Tuning fork**

- 43
- 44 • The sensory examination should be carried out in a quiet and relaxed setting.
- 45 First, apply the tuning fork on the patient's wrists (or elbow or clavicle) so that
- 46 he/she knows what to expect.
- 47
- 48 • The patient must not be able to see whether or where the examiner applies the
- 49 tuning fork. The tuning fork is applied on a bony part on the dorsal side of the distal
- 50 phalanx of the first toe.
- 51 • The tuning fork should be applied perpendicularly with constant pressure.
- 52 • Repeat this application twice, but alternate this with at least one 'mock'
- 53 application in which the tuning fork is not vibrating.
- 54
- 55
- 56
- 57
- 58
- 59
- 60

- 1  
2  
3 • *The test is positive if the patient incorrectly answers at least two out of three*  
4 *applications, ('at risk for ulceration') and negative with two out of three correct*  
5 *answers. (A test is positive if it identifies the risk).*  
6 • If the patient is unable to sense the vibrations on the big toe, the test is repeated  
7 more proximally (malleolus, tibial tuberosity).  
8 • Encourage the patient during testing by giving a positive feedback.  
9  
10  
11  
12  
13  
14  
15  
16  
17  
18  
19  
20  
21  
22  
23  
24  
25  
26  
27  
28  
29  
30  
31  
32  
33  
34  
35  
36  
37  
38  
39  
40  
41  
42  
43  
44  
45  
46  
47  
48  
49  
50  
51  
52  
53  
54  
55  
56  
57  
58  
59  
60

For peer review only

## Screening for High Risk Patients: Foot Deformities

To understand foot deformities, it is important to recognize that foot structure and function is incredibly complex and can easily go awry. Normal foot architecture is maintained through a balance of forces applied by muscles and tendons on bones. Atrophy of a muscle group through nerve damage can lead to deformity. It is important to watch areas that can be open to friction and repetitive micro-trauma as those sites can lead to callus and ulceration.

### Types of foot deformities include:

- The **bunion**, or **hallux valgus**, increases the risk for ulceration through a mechanism of increased pressures and friction and repetitive micro-trauma that outpaces the healing capacity at the bunion site.
- **Hammer** and **claw toe** deformities develop from atrophy of the small muscles between the toes. Both the dorsal and plantar aspects of the involved toes are at risk for friction and pressure related trauma with subsequent ulceration.
- **Charcot foot** is one of the most severe diabetic foot deformity in which the entire mid-section of the foot collapses and forms a classic “rocker bottom” sole. It is caused by a combination of sensory and autonomic nerve dysfunction in which microscopic fractures to the tarsal bones trigger an inflammatory response and subsequent dissolution of the tarsal and metatarsal bones of the foot. The arch becomes inverted, which causes high plantar pressures, and is at extreme risk for ulceration.

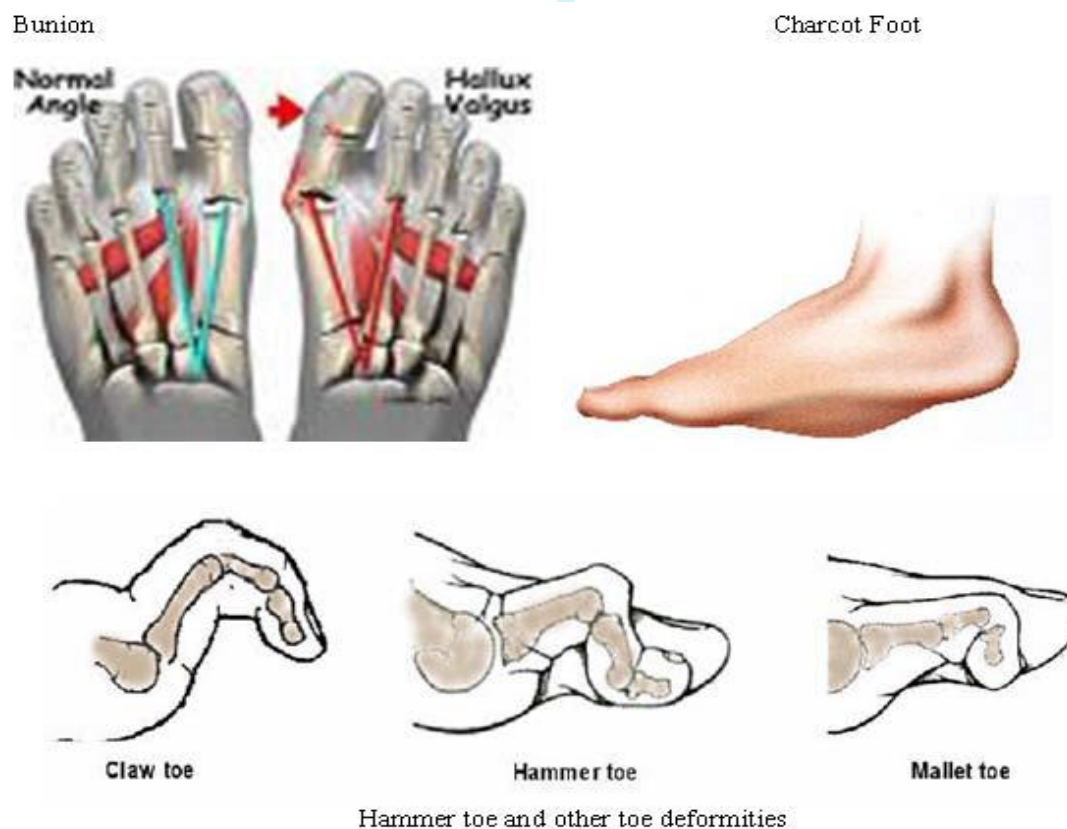

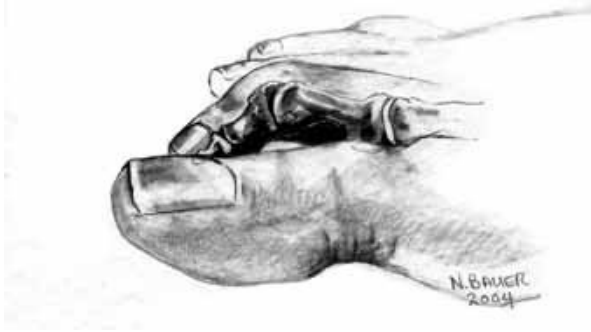

**Hammer toe – bent middle joint**

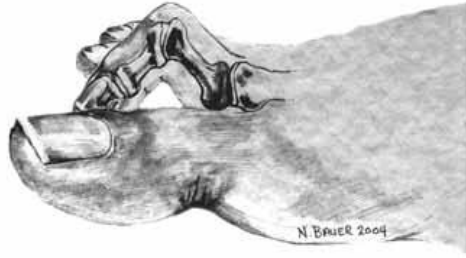

**Claw Toe – joint at base of toe is bent up and middle joint is bent down**

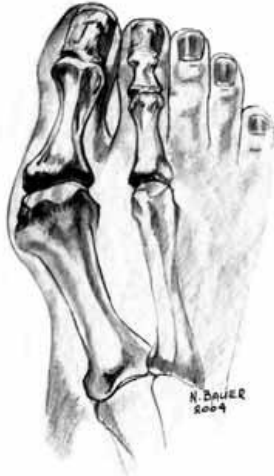

**Halgus Valgus or Small Bunion (Mild/Moderate)**

– Joint at the base of big toe is pushed to the side

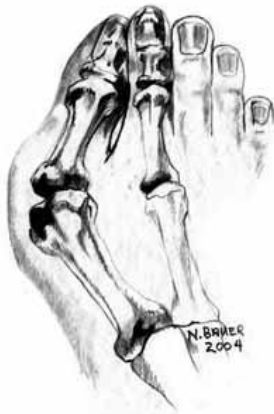

**Hallus Valgus or Large Bunion (Severe)**

– Big toe may move under second toe

1  
2  
3  
4  
5  
6  
7  
8  
9  
10  
11  
12  
13  
14  
15  
16  
17  
18  
19  
20  
21  
22  
23  
24  
25  
26  
27  
28  
29  
30  
31  
32  
33  
34  
35  
36  
37  
38  
39  
40  
41  
42  
43  
44  
45  
46  
47  
48  
49  
50  
51  
52  
53  
54  
55  
56  
57  
58  
59  
60

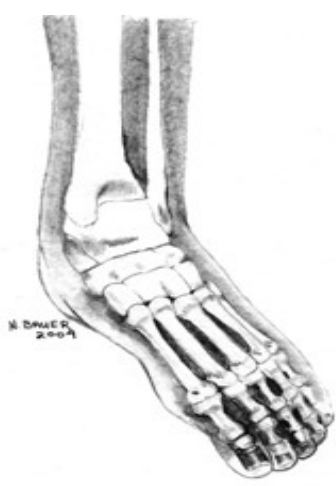

**Pes Planus**

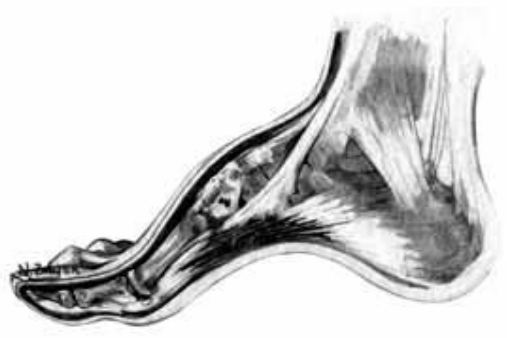

**Pes Cavus**

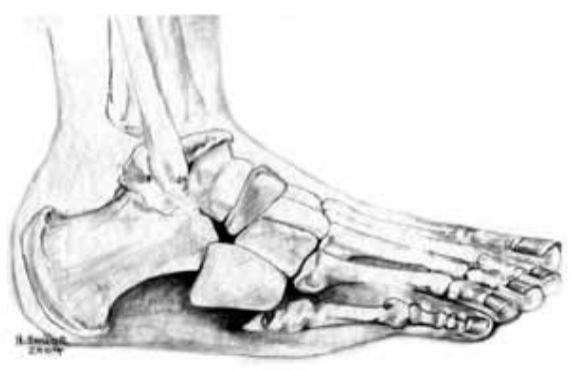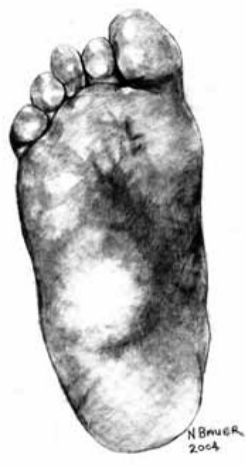

**Charcot Arthropathy**

1  
2  
3 Pes planus produces flattening of the foot. Pes planus feet have increased lateral  
4 talometatarsal angle and increased second metatarsal length (Ledoux, Shofer,  
5 Ahroni, Smith, Sangeorzan & Boyko, 2003). There are many reasons for this  
6 condition, the first of which is heredity. Many have this condition and never have  
7 any problems of any kind.  
8

9  
10 However, others will have this condition created through years in soft, unsupportive  
11 shoes on hard surfaces, injury, pregnancy, or other factors. This often leads to other  
12 problems.  
13

14 The arch in the foot is caused by a broad band of fibrous connective tissue, called  
15 the longitudinal ligament. A ligament is nothing more than connective tissue that  
16 connects bone to bone. The longitudinal ligament connects the metatarsal  
17 phalangeal joints to the os calcis or heel bone. Like a string on a bow, they hold the  
18 two ends together and create an arch. This arch is a shock absorption structure and  
19 it also helps to maintain all the tarsals in proper erect anatomic position. As this  
20 arch decreases, impact from the concrete becomes worse.  
21  
22

23 When the arch ligament stretches or tears, the arch falls. If it falls far enough, the  
24 tarsals may begin to shift to the inside or create pronation or a valgus (greater than  
25 90 degree erect) position at the ankle. This can cause problems in the origin area,  
26 (the metatarsals) or in the heel. It also may cause pressure on the medial (inner)  
27 knee and perhaps the hip and back. It is like pulling the string on a marionette too  
28 tight, the result is a kinked mass on one side. The human body is much the same,  
29 put too much tension on major muscle groups and the joints kink and yell back.  
30  
31

32 In pes cavus, the arch is abnormally high on weight bearing. The heel is often tilted  
33 inwards at the ankle (but not always). In many, the toes will appear clawed. When  
34 not standing the front half of the foot (forefoot) will appear to be dropped below the  
35 level of the rear foot. Ledoux et al. (2003) identified biomechanical differences  
36 among pes planus and pes cavus feet in persons with diabetes. They found pes  
37 cavus feet had more prominent metatarsal heads, bony prominences, hammer/claw  
38 toes, increased hallux dorsiflexion and Pes Cavus decreased hallux plantarflexion.  
39  
40

41 Charcot joint is a form of neuroarthropathy that occurs most often in the foot.  
42 **Nerve damage from diabetes causes decreased sensation, muscle and**  
43 **ligament atrophy and subsequent joint instability.** Walking on this insensitive  
44 and weakened joint can cause even more damage to the foot structure. In the acute  
45 stage there is inflammation and bone reabsorption which destroys the bone. In later  
46 stages, the arch falls and the foot may develop a rocker bottom appearance. Weight  
47 distribution of the sole is altered causing deformities leading to pressure points that  
48 enhance ulcer development. Signs to assess for are: hot on the onset, pain,  
49 discomfort, erythema, swelling, rigid deformities, limited joint mobility, callus  
50 formation (ADA, 2001; Bowker & Pfeifer, 2001). One in 680 people with diabetes  
51 develop Charcot joint with an incidence of 9-12% individuals with documented  
52 diabetic peripheral neuropathy (Royal Melbourne Hospital, 2002). It is important  
53 that the Charcot foot is recognized early so that appropriate treatment of the foot  
54  
55  
56  
57  
58  
59  
60

can be provided to prevent further injury and promote a stable foot (Lavery et al., 1998).

## Screening for high risk patient: Vascular

**There are three non-invasive assessments for detecting peripheral vascular disease:**

**The palpitation of pedal pulses is most simple and fastest.** The dorsalis pedis and posterior tibial are the two main arteries in the foot.

- The dorsalis pedis is on the dorsum or top of the foot.
- The posterior tibial is palpitated behind the medial malleolus, or inside the ankle bone.

### **Pedal Pulse Assessment:**

Locating a pedal pulse is part of the trauma patient assessment and performed before and after lower extremity splint application as well as long backboard immobilization. Locating a pedal pulse can be difficult even in healthy patients. Use these tips to find a patient's pedal pulse:

- 1) First assess the patient's radial pulse rate and rhythm so you know what you are seeking.
- 2) Move shoes, socks, tights, and anklets out of the way to expose the patient's skin.
- 3) Move, if not compromised by injury, the patient's foot towards the normal anatomical position.
- 4) Check for either the dorsalis pedis pulse (on the top of the foot) or the posterior tibial pulse (located behind the medial malleolus — the ankle bone).
- 5) For dorsalis pedis, first visualize because you might see the skin pulsating above the artery. If you are unable to see anything, hold two or more fingers lightly against the skin. Move up from the toes towards the leg until you locate the pulse.
- 6) For posterior tibial — on the medial side of the ankle — use two or more fingers. Sometimes you may need more pressure to find this pulse.

If you are unable to find the pedal pulse on one leg, switch to the patient's other leg. Knowing the location of one pulse might help you find the other.

Once you have found a pedal pulse, consider using a ballpoint or felt pen to make a light mark at the pulse location to make reassessment easier. Finally, if the patient's foot is warm with normal color, it is adequately perfused.

-----**Picture of clinical examination (removed due to ethical issue)**-----

## **Ankle Brachial Index (ABI):**

- An Ankle Brachial Index (ABI) can be performed with a handheld Doppler and a blood pressure cuff.

### **To obtain an ABI:**

#### ***1. First measure brachial pressures in each arm.***

- Apply the cuff to the upper arm
- Locate the brachial pulse with the Doppler and mark with a pen
- Inflate the cuff, apply Doppler, deflate the cuff and record the pressure at which flow is heard.

#### ***2. Next measure pressure in each ankle.***

- Apply cuff to the calf
- Locate the posterior tibial pulse with the Doppler and mark with a pen.
- Inflate the cuff, apply Doppler, deflate the cuff and record the pressure at which the flow is heard.

3. ***To calculate ABI***, divide the ankle pressure by the greater of the toe brachial pressures. While there is no clear threshold for increased risk, most accept a value of below 0.9 or 0.8 as conferring moderately high risk.

***Example:*** Calculate ankle brachial index by dividing systolic ankle pressure by systolic brachial pressure e.g. ankle pressure is 120 mmHg and brachial pressure is 132 mmHg, ankle brachial index is  $120/132 = 0.9$

Some data suggests the Toe BI measurement is more accurate than the ABI, but it requires specialized equipment and is not routine in primary care.

|                           |               |                                                                  |
|---------------------------|---------------|------------------------------------------------------------------|
| Normal                    | 0.9 - 1.2     | Risk of vascular foot ulcer is small                             |
| Definite vascular disease | 0.6 - 0.9     | Risk of vascular ulcer moderate, depending on other risk factors |
| Severe vascular disease   | Less than 0.6 | Risk of vascular foot ulcer very high                            |



1  
2  
3 **N.B.:** Ankle brachial index may not be able to be reliably calculated in some people  
4 with diabetes as the arteries in the ankles may be calcified.  
5

6 **Assess peripheral circulation** with thorough palpation of **pedal pulses** (dorsalis  
7 pedis and posterior tibial). If there are no palpable pulses, and calculate ankle  
8 brachial index or consider referral to a vascular specialist. **Absent pulses, calf**  
9 **claudication, absence of hair on the feet, altered temperature** (a cold foot) and  
10 **thin, bluish skin** are suggestive of **peripheral arterial disease**. A bounding, easily  
11 detected pulse in a **warm, dry foot** is suggestive of **autonomic neuropathy**, which  
12 causes abnormal arterio-venous shunting.  
13  
14  
15  
16  
17  
18  
19  
20  
21  
22  
23  
24  
25  
26  
27  
28  
29  
30  
31  
32  
33  
34  
35  
36  
37  
38  
39  
40  
41  
42  
43  
44  
45  
46  
47  
48  
49  
50  
51  
52  
53  
54  
55  
56  
57  
58  
59  
60

## Screening for high risk patient: Foot mobility

### Limited Joint Mobility:

Progressive stiffening of collagen-containing tissues leads to thickening of the skin, loss of joint mobility, and potential fixed flexor deformity. Up to 30% of patients with diabetes may have limited joint mobility. Reduction in mobility of the ankle joint may cause increased plantar pressure when walking and be a major risk factor in the pathogenesis of diabetic foot ulcers (Fernando, Masson, Veves & Boulton, 1991; Zimny, Schatz & Pfohl, 2004). Achilles tendon contracture is a common cause of limited joint mobility causing increased pressure on the forefoot during ambulation (Armstrong, Lavery & Bushman, 1998; Mueller, Sinacore, Hastings, Strube & Johnson, 2004).

### Starting position:

For all of the measurements, the same starting position is used. Position the participant on the bed / plinth in long sitting, reclined to about 45 degrees. Place a pillow under upper part of the lower legs to flex the knee to 20-30° and lifting the heels off the surface of the bed / plinth. Ensure the patient is comfortable during the measurements. If it is not possible for the patient to get into the starting position then the measurements could be taken sitting, as long as the knee remains more than 20 degrees flexed and the heel is not directly resting on a support.

-----Picture of clinical examination (removed due to ethical issue) -----

### Measuring the range of motion

For the purposes of the trial, measure the uninjured ankle (if appropriate) and then the injured ankle.

Ask the patient to move as far as comfortable, not into pain. Measure how far the patient can move the foot / ankle themselves, do not assist the movement.

### Ankle dorsiflexion and plantar flexion

Angles are measured from neutral (plantar grade), which is measured as 0°.

-----Picture of clinical examination (removed due to ethical issue) -----

### Positioning and alignment of the goniometer:

-----Picture of clinical examination (removed due to ethical issue) -----

### Goniometer axis

1  
2  
3 The axis of the goniometer placed approximately 1.5 cm inferior to the lateral  
4 malleolus.

5  
6 **Stationary arm**

7  
8 Parallel to the longitudinal axis of the fibula, lining up with the fibula head.

9  
10  
11 **Moveable arm**

12 Parallel to the longitudinal axis of the 5<sup>th</sup> metatarsal.

13  
14  
15 **Instructions:**

16  
17  
18 **Dorsiflexion:** Ask the patient to pull their foot towards  
19 them (Normal range is typically 0-20°)

20  
21 -----Picture of clinical examination (removed due to ethical issue) -----  
22

23  
24 **Plantar flexion:** Ask the patient to point their foot  
25 away (normal range is typically 0-50°)

26  
27 -----Picture of clinical examination (removed due to ethical issue) -----  
28

29  
30  
31 **Measure and record the angle between the movable and stationary arms in degrees.**

32  
33 **Ankle inversion and eversion**

34  
35 Angles are measured from neutral, which is measured as 0°.  
36 Key bony landmarks that help to orientate the goniometer

37  
38  
39 **Positioning and alignment of the goniometer:**

40  
41 -----Picture of clinical examination (removed due to ethical issue) -----  
42

43 **Goniometer axis**

44 The axis of the goniometer is placed on the front of the ankle at the mid-point between the  
45 medial and lateral malleoli.

46  
47  
48 **Stationary arm**

49 Along the tibial crest (prominent line of bone down the front of the shin)

50  
51 **Moveable arm**

52 In line with the 2<sup>nd</sup> metatarsal (lining up with the base of the second toe)

# Consent Form

Annex 1

1 **Dear Participant,**

2 **Purposive Selection**

3  
4 You have been purposively selected to be part of this thesis and this is why we would like to interview  
5 you. This thesis is being conducted by **Palash Chandra Banik**, a student of M.Phil in Non-  
6 communicable Diseases at Bangladesh Institute of Health Sciences (BIHS) under Bangabandhu Sheikh  
7 Mujib Medical University (BSMMU). This type of study is currently taking place in several countries  
8 around the world.

9  
10 **Title of Thesis**

11 The title of this thesis is **“Risk of foot ulcer and its determinants among Type 2 diabetic subjects”**.

12  
13 **Aim of the Thesis**

14 To determine diabetic patients at risk for foot ulceration through a multi-center hospital based study in  
15 Bangladesh

16  
17 **Data Collection Methods**

18 **Step 1-** Interview questions

19 **Step 2-** Physical examination & screening test (foot)

20 **Timeframe**

21 It is estimated that step 1 & 2 of this study will take approximately 30-40 minutes.

22  
23 **Confidentiality**

24 The information you provide is totally confidential and will not be disclosed to anyone. It will only be  
25 used for research purposes. Your name, address, and other personal information will be removed from  
26 the instrument, and only a code will be used to connect your name and your answers without  
27 identifying you.

28  
29 **Results**

30 The results of this thesis will be used to help plan strategies in reducing the risk factor that contribute to  
31 diabetic foot ulcer among the diabetic patients as well as chronic non-communicable diseases in  
32 Bangladesh.

33  
34 The results will be published in research publications, media briefings and reports and can be made  
35 available to you by local health workers.

36  
37 **Voluntary Participation**

38 Your participation is voluntary and you can withdraw from the study after having agreed to participate.  
39 You are free to refuse to answer any question that is asked in the questionnaire. If you have any  
40 questions about this study you may ask me or contact to the researcher [Palash Chandra Banik, cell:  
41 +8801710972498].

42  
43 **Consent to Participate**

44 Signing this consent indicates that you understand what will be expected of you and are willing to  
45 participate in this survey.

|                        |  |             |  |
|------------------------|--|-------------|--|
| 46 Read by Participant |  | Interviewer |  |
| 47 Agreed              |  | Refused     |  |

48  
49  
50 **Signatures**

51 I hereby provide INFORMED CONSENT to take part in Steps 1 and 2 of this Risk Factor Study.

52  
53  
54 **Name of the participant:**

**Witness:**

55  
56 **Sign or fingerprint**

**Sign or fingerprint**

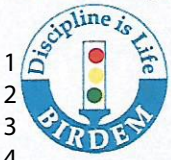

**BIRDEM**

An Enterprise of the  
Diabetic Association of  
Bangladesh

**Bangladesh Institute of Research  
and Rehabilitation in Diabetes,  
Endocrine and Metabolic Disorders**



WHO Collaborating Centre  
for Prevention and Control  
of Diabetes

Memo No: BADAS/BIO/EA/11/033

Date: 17.01.2011

**To**  
**Palash Chandra Banik**  
**Student, MPhil in Noncommunicable Diseases (NCD)**  
**Department of Community Medicine (CM)**  
**Bangladesh Institute of Health Sciences (BIHS)**

***Subject: Ethical Clearance***

The Ethical Review Committee (ERC) of the Bangladesh Diabetic Association (BADAS) has the pleasure to accord ethical clearance to your Protocol "**Risk of foot ulcer and its determinants among type 2 diabetic subjects in Bangladesh**" subject to the condition that the guidelines must be followed carefully.

- The Ethical Review Committee approves this study from an ethical point of view upon the addressing by the researchers of the concerns as raised by the ERC affiliates.
- Approval is given for three years. Projects, which have not commenced within two years of original approval, must be re-submitted to ERC. You must inform ERC when the research has been completed.
- Any serious adverse events or significant change which occurs in connection with this study and/or which may alter its ethical considerations must be reported immediately to the ERC.
- Approval is given on the understanding that the 'Guidelines for Ethical Review' are adhered to.

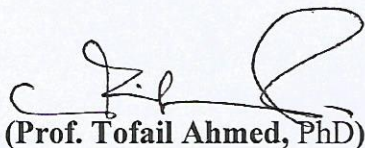

**(Prof. Tofail Ahmed, PhD)**

*Chairman*  
*Ethical Review Committee*

|    | id | Center | Q1_age | Q1a_sex | rec_area | rec_edu | rec_occ | rec_marr |
|----|----|--------|--------|---------|----------|---------|---------|----------|
| 1  |    |        |        |         |          |         |         |          |
| 2  |    |        |        |         |          |         |         |          |
| 3  |    |        |        |         |          |         |         |          |
| 4  | 1  | 1      | 70     | 2       | 1        | 2       | 2       | 1        |
| 5  | 2  | 1      | 55     | 2       | 2        | 3       | 3       | 1        |
| 6  | 3  | 1      | 35     | 2       | 1        | 4       | 1       | 1        |
| 7  | 4  | 1      | 57     | 2       | 1        | 3       | 3       | 1        |
| 8  | 5  | 1      | 57     | 2       | 1        | 3       | 3       | 1        |
| 9  | 6  | 1      | 50     | 2       | 1        | 2       | 3       | 1        |
| 10 | 7  | 1      | 56     | 2       | 1        | 1       | 3       | 1        |
| 11 | 8  | 1      | 55     | 2       | 1        | 2       | 3       | 1        |
| 12 | 9  | 1      | 70     | 2       | 1        | 2       | 3       | 1        |
| 13 | 10 | 1      | 75     | 2       | 1        | 2       | 3       | 1        |
| 14 | 11 | 1      | 65     | 2       | 1        | 2       | 3       | 1        |
| 15 | 12 | 1      | 60     | 2       | 1        | 2       | 3       | 1        |
| 16 | 13 | 1      | 45     | 1       | 1        | 4       | 1       | 1        |
| 17 | 14 | 1      | 58     | 2       | 1        | 3       | 3       | 1        |
| 18 | 15 | 1      | 47     | 2       | 2        | 1       | 3       | 1        |
| 19 | 16 | 1      | 62     | 1       | 1        | 4       | 1       | 1        |
| 20 | 17 | 1      | 45     | 1       | 1        | 4       | 1       | 1        |
| 21 | 18 | 1      | 34     | 1       | 2        | 2       | 4       | 1        |
| 22 | 19 | 1      | 68     | 1       | 1        | 3       | 1       | 1        |
| 23 | 20 | 1      | 58     | 1       | 1        | 4       | 2       | 1        |
| 24 | 21 | 1      | 60     | 1       | 1        | 2       | 4       | 1        |
| 25 | 22 | 1      | 51     | 2       | 2        | 2       | 3       | 1        |
| 26 | 23 | 1      | 53     | 1       | 1        | 3       | 2       | 1        |
| 27 | 24 | 1      | 70     | 1       | 1        | 4       | 1       | 1        |
| 28 | 25 | 1      | 70     | 1       | 1        | 2       | 1       | 1        |
| 29 | 26 | 1      | 27     | 1       | 1        | 4       | 1       | 1        |
| 30 | 27 | 1      | 60     | 1       | 1        | 2       | 1       | 1        |
| 31 | 28 | 1      | 73     | 1       | 1        | 4       | 1       | 1        |
| 32 | 29 | 1      | 55     | 1       | 2        | 2       | 1       | 1        |
| 33 | 30 | 1      | 55     | 1       | 1        | 4       | 2       | 1        |
| 34 | 31 | 1      | 44     | 1       | 1        | 2       | 2       | 1        |
| 35 | 32 | 1      | 50     | 1       | 1        | 4       | 4       | 1        |
| 36 | 33 | 1      | 67     | 1       | 1        | 4       | 1       | 1        |
| 37 | 34 | 1      | 77     | 1       | 1        | 2       | 4       | 1        |
| 38 | 35 | 1      | 44     | 1       | 1        | 4       | 1       | 1        |
| 39 | 36 | 1      | 40     | 1       | 2        | 4       | 1       | 1        |
| 40 | 37 | 1      | 80     | 1       | 1        | 4       | 1       | 1        |
| 41 | 38 | 1      | 63     | 1       | 1        | 2       | 1       | 1        |
| 42 | 39 | 1      | 50     | 1       | 1        | 3       | 2       | 1        |
| 43 | 40 | 1      | 50     | 1       | 1        | 4       | 1       | 1        |
| 44 | 41 | 1      | 50     | 1       | 1        | 4       | 1       | 1        |
| 45 | 42 | 1      | 80     | 1       | 1        | 3       | 1       | 1        |
| 46 | 43 | 1      | 50     | 1       | 2        | 3       | 1       | 1        |
| 47 | 44 | 1      | 48     | 1       | 1        | 4       | 1       | 1        |
| 48 | 45 | 1      | 72     | 1       | 1        | 3       | 1       | 1        |
| 49 | 46 | 1      | 58     | 1       | 1        | 2       | 2       | 1        |
| 50 | 47 | 1      | 59     | 1       | 1        | 3       | 1       | 1        |
| 51 | 48 | 1      | 65     | 1       | 1        | 4       | 1       | 1        |

|    |    |   |    |   |   |   |   |   |
|----|----|---|----|---|---|---|---|---|
| 1  |    |   |    |   |   |   |   |   |
| 2  | 49 | 1 | 54 | 1 | 1 | 2 | 4 | 1 |
| 3  | 50 | 1 | 58 | 1 | 1 | 2 | 4 | 1 |
| 4  | 51 | 1 | 67 | 1 | 1 | 4 | 1 | 1 |
| 5  | 52 | 1 | 50 | 1 | 1 | 4 | 1 | 1 |
| 6  |    |   |    |   |   |   |   |   |
| 7  | 53 | 1 | 65 | 1 | 1 | 4 | 2 | 1 |
| 8  | 54 | 1 | 78 | 1 | 1 | 4 | 1 | 1 |
| 9  | 55 | 1 | 55 | 1 | 1 | 4 | 1 | 1 |
| 10 | 56 | 1 | 41 | 1 | 1 | 4 | 4 | 1 |
| 11 | 57 | 1 | 75 | 1 | 1 | 4 | 2 | 1 |
| 12 | 58 | 1 | 76 | 1 | 1 | 4 | 1 | 1 |
| 13 | 59 | 1 | 52 | 1 | 1 | 4 | 1 | 1 |
| 14 | 60 | 1 | 51 | 1 | 2 | 3 | 2 | 1 |
| 15 | 61 | 1 | 63 | 1 | 1 | 2 | 1 | 1 |
| 16 | 62 | 1 | 68 | 1 | 1 | 4 | 1 | 1 |
| 17 | 63 | 1 | 58 | 1 | 1 | 2 | 2 | 1 |
| 18 | 64 | 1 | 62 | 1 | 1 | 4 | 1 | 1 |
| 19 | 65 | 1 | 50 | 1 | 1 | 3 | 1 | 1 |
| 20 | 66 | 1 | 65 | 1 | 1 | 3 | 1 | 1 |
| 21 | 67 | 1 | 61 | 1 | 1 | 3 | 4 | 1 |
| 22 | 68 | 1 | 66 | 1 | 1 | 2 | 2 | 1 |
| 23 | 69 | 1 | 40 | 1 | 1 | 3 | 2 | 1 |
| 24 | 70 | 1 | 48 | 1 | 1 | 4 | 4 | 1 |
| 25 | 71 | 1 | 37 | 2 | 2 | 2 | 3 | 1 |
| 26 | 72 | 1 | 42 | 2 | 1 | 2 | 3 | 1 |
| 27 | 73 | 1 | 63 | 2 | 1 | 2 | 3 | 1 |
| 28 | 74 | 1 | 56 | 2 | 1 | 2 | 3 | 1 |
| 29 | 75 | 1 | 70 | 2 | 1 | 3 | 3 | 1 |
| 30 | 76 | 1 | 50 | 2 | 2 | 1 | 3 | 1 |
| 31 | 77 | 1 | 71 | 2 | 1 | 2 | 3 | 1 |
| 32 | 78 | 1 | 70 | 2 | 1 | 2 | 3 | 1 |
| 33 | 79 | 1 | 58 | 2 | 1 | 4 | 3 | 1 |
| 34 | 80 | 1 | 70 | 1 | 1 | 2 | 3 | 1 |
| 35 | 81 | 1 | 44 | 2 | 1 | 1 | 4 | 1 |
| 36 | 82 | 1 | 55 | 2 | 1 | 4 | 1 | 1 |
| 37 | 83 | 1 | 41 | 2 | 1 | 4 | 1 | 1 |
| 38 | 84 | 1 | 52 | 2 | 1 | 2 | 3 | 1 |
| 39 | 85 | 1 | 52 | 2 | 1 | 2 | 3 | 1 |
| 40 | 86 | 1 | 55 | 2 | 1 | 4 | 1 | 1 |
| 41 | 87 | 1 | 55 | 2 | 1 | 2 | 1 | 1 |
| 42 | 88 | 1 | 50 | 2 | 1 | 3 | 3 | 1 |
| 43 | 89 | 1 | 59 | 2 | 1 | 3 | 3 | 1 |
| 44 | 90 | 1 | 52 | 2 | 2 | 2 | 3 | 1 |
| 45 | 91 | 1 | 42 | 2 | 2 | 3 | 1 | 1 |
| 46 | 92 | 1 | 56 | 2 | 1 | 2 | 3 | 1 |
| 47 | 93 | 1 | 50 | 2 | 1 | 4 | 1 | 1 |
| 48 | 94 | 1 | 33 | 2 | 1 | 3 | 3 | 1 |
| 49 | 95 | 1 | 52 | 2 | 1 | 2 | 3 | 1 |
| 50 | 96 | 1 | 55 | 2 | 1 | 2 | 3 | 1 |
| 51 | 97 | 1 | 45 | 2 | 2 | 2 | 3 | 1 |
| 52 | 98 | 1 | 65 | 2 | 1 | 2 | 3 | 1 |

|    |     |   |    |   |   |   |   |   |
|----|-----|---|----|---|---|---|---|---|
| 1  |     |   |    |   |   |   |   |   |
| 2  | 99  | 1 | 58 | 2 | 1 | 3 | 3 | 1 |
| 3  | 100 | 1 | 45 | 2 | 1 | 3 | 3 | 1 |
| 4  | 101 | 1 | 57 | 2 | 1 | 2 | 3 | 1 |
| 5  | 102 | 1 | 30 | 2 | 1 | 2 | 3 | 1 |
| 6  | 103 | 1 | 52 | 2 | 1 | 1 | 3 | 1 |
| 7  | 104 | 1 | 47 | 2 | 1 | 2 | 3 | 1 |
| 8  | 105 | 1 | 68 | 2 | 1 | 1 | 4 | 1 |
| 9  | 106 | 1 | 42 | 2 | 2 | 3 | 3 | 1 |
| 10 | 107 | 1 | 68 | 2 | 1 | 4 | 3 | 1 |
| 11 | 108 | 1 | 43 | 2 | 1 | 2 | 3 | 1 |
| 12 | 109 | 1 | 65 | 2 | 2 | 1 | 3 | 1 |
| 13 | 110 | 1 | 71 | 2 | 1 | 3 | 1 | 1 |
| 14 | 111 | 1 | 50 | 2 | 1 | 2 | 3 | 1 |
| 15 | 112 | 1 | 70 | 2 | 1 | 2 | 3 | 1 |
| 16 | 113 | 1 | 65 | 2 | 2 | 1 | 3 | 1 |
| 17 | 114 | 1 | 35 | 2 | 1 | 1 | 3 | 1 |
| 18 | 115 | 1 | 32 | 2 | 1 | 2 | 3 | 1 |
| 19 | 116 | 1 | 45 | 2 | 1 | 1 | 3 | 1 |
| 20 | 117 | 1 | 65 | 2 | 1 | 3 | 3 | 1 |
| 21 | 118 | 1 | 64 | 2 | 1 | 2 | 3 | 1 |
| 22 | 119 | 1 | 60 | 2 | 1 | 3 | 3 | 1 |
| 23 | 120 | 1 | 52 | 2 | 1 | 2 | 3 | 1 |
| 24 | 121 | 1 | 45 | 2 | 1 | 2 | 3 | 1 |
| 25 | 122 | 1 | 45 | 2 | 1 | 2 | 3 | 1 |
| 26 | 123 | 1 | 40 | 2 | 1 | 2 | 3 | 1 |
| 27 | 124 | 1 | 32 | 2 | 1 | 4 | 1 | 1 |
| 28 | 125 | 1 | 75 | 2 | 1 | 2 | 3 | 1 |
| 29 | 126 | 1 | 50 | 2 | 1 | 2 | 3 | 1 |
| 30 | 127 | 1 | 68 | 2 | 2 | 2 | 3 | 1 |
| 31 | 128 | 1 | 60 | 2 | 1 | 2 | 3 | 1 |
| 32 | 129 | 1 | 50 | 2 | 1 | 2 | 3 | 1 |
| 33 | 130 | 1 | 45 | 2 | 1 | 3 | 3 | 1 |
| 34 | 131 | 1 | 61 | 2 | 1 | 2 | 3 | 1 |
| 35 | 132 | 1 | 55 | 2 | 1 | 3 | 3 | 1 |
| 36 | 133 | 1 | 50 | 2 | 1 | 3 | 3 | 1 |
| 37 | 134 | 1 | 45 | 2 | 1 | 2 | 3 | 1 |
| 38 | 135 | 1 | 45 | 2 | 1 | 2 | 3 | 1 |
| 39 | 136 | 1 | 52 | 2 | 1 | 3 | 3 | 1 |
| 40 | 137 | 1 | 62 | 2 | 1 | 2 | 3 | 1 |
| 41 | 138 | 1 | 62 | 2 | 1 | 2 | 3 | 1 |
| 42 | 139 | 1 | 82 | 2 | 1 | 2 | 3 | 1 |
| 43 | 140 | 1 | 60 | 2 | 1 | 3 | 3 | 1 |
| 44 | 141 | 1 | 59 | 2 | 1 | 3 | 3 | 1 |
| 45 | 142 | 1 | 57 | 2 | 1 | 2 | 3 | 1 |
| 46 | 143 | 1 | 60 | 2 | 1 | 2 | 3 | 1 |
| 47 | 144 | 1 | 55 | 2 | 1 | 3 | 3 | 1 |
| 48 | 145 | 1 | 50 | 2 | 1 | 3 | 3 | 1 |
| 49 | 146 | 1 | 50 | 2 | 1 | 3 | 3 | 1 |
| 50 | 147 | 1 | 55 | 2 | 1 | 4 | 1 | 1 |
| 51 | 148 | 1 | 75 | 2 | 1 | 4 | 4 | 1 |



|    |     |   |    |   |   |   |   |   |
|----|-----|---|----|---|---|---|---|---|
| 1  |     |   |    |   |   |   |   |   |
| 2  | 149 | 1 | 50 | 2 | 1 | 2 | 3 | 1 |
| 3  | 150 | 1 | 44 | 2 | 1 | 3 | 3 | 1 |
| 4  | 151 | 1 | 37 | 2 | 1 | 2 | 3 | 1 |
| 5  | 152 | 1 | 40 | 2 | 1 | 1 | 3 | 1 |
| 6  | 153 | 1 | 85 | 2 | 1 | 2 | 3 | 1 |
| 7  | 154 | 1 | 43 | 2 | 1 | 3 | 4 | 1 |
| 8  | 155 | 1 | 65 | 2 | 1 | 2 | 3 | 1 |
| 9  | 156 | 1 | 63 | 2 | 1 | 2 | 3 | 1 |
| 10 | 157 | 1 | 55 | 2 | 1 | 3 | 3 | 1 |
| 11 | 158 | 1 | 53 | 2 | 1 | 2 | 3 | 1 |
| 12 | 159 | 1 | 62 | 2 | 1 | 2 | 3 | 1 |
| 13 | 160 | 1 | 65 | 2 | 1 | 4 | 3 | 1 |
| 14 | 161 | 1 | 34 | 2 | 1 | 4 | 3 | 1 |
| 15 | 162 | 1 | 63 | 2 | 1 | 3 | 3 | 1 |
| 16 | 163 | 1 | 60 | 2 | 1 | 2 | 3 | 1 |
| 17 | 164 | 1 | 43 | 2 | 1 | 2 | 3 | 1 |
| 18 | 165 | 1 | 65 | 2 | 1 | 2 | 3 | 1 |
| 19 | 166 | 1 | 56 | 2 | 1 | 4 | 3 | 1 |
| 20 | 167 | 1 | 40 | 2 | 1 | 2 | 3 | 1 |
| 21 | 168 | 1 | 40 | 2 | 1 | 4 | 3 | 1 |
| 22 | 169 | 1 | 55 | 2 | 1 | 2 | 3 | 1 |
| 23 | 170 | 1 | 66 | 2 | 1 | 3 | 3 | 1 |
| 24 | 171 | 1 | 70 | 2 | 1 | 4 | 3 | 1 |
| 25 | 172 | 1 | 47 | 2 | 1 | 3 | 3 | 1 |
| 26 | 173 | 1 | 45 | 2 | 1 | 1 | 3 | 1 |
| 27 | 174 | 1 | 36 | 2 | 1 | 3 | 3 | 1 |
| 28 | 175 | 1 | 52 | 2 | 1 | 2 | 3 | 1 |
| 29 | 176 | 1 | 57 | 2 | 1 | 3 | 3 | 1 |
| 30 | 177 | 1 | 20 | 2 | 1 | 3 | 3 | 1 |
| 31 | 178 | 1 | 50 | 2 | 1 | 4 | 1 | 1 |
| 32 | 179 | 1 | 57 | 2 | 1 | 4 | 3 | 1 |
| 33 | 180 | 1 | 40 | 2 | 1 | 4 | 1 | 1 |
| 34 | 181 | 1 | 51 | 2 | 1 | 2 | 3 | 1 |
| 35 | 182 | 1 | 50 | 2 | 1 | 4 | 3 | 1 |
| 36 | 183 | 1 | 45 | 2 | 1 | 3 | 3 | 1 |
| 37 | 184 | 1 | 40 | 2 | 1 | 3 | 3 | 1 |
| 38 | 185 | 1 | 62 | 2 | 1 | 3 | 3 | 1 |
| 39 | 186 | 1 | 38 | 2 | 1 | 3 | 3 | 1 |
| 40 | 187 | 1 | 52 | 2 | 1 | 2 | 3 | 1 |
| 41 | 188 | 1 | 50 | 2 | 1 | 2 | 3 | 1 |
| 42 | 189 | 1 | 65 | 2 | 1 | 3 | 3 | 1 |
| 43 | 190 | 1 | 55 | 2 | 1 | 2 | 3 | 1 |
| 44 | 191 | 1 | 50 | 2 | 1 | 1 | 3 | 1 |
| 45 | 192 | 1 | 65 | 2 | 2 | 2 | 3 | 1 |
| 46 | 193 | 1 | 50 | 2 | 1 | 2 | 3 | 1 |
| 47 | 194 | 1 | 46 | 2 | 1 | 4 | 1 | 1 |
| 48 | 195 | 1 | 51 | 2 | 1 | 3 | 3 | 1 |
| 49 | 196 | 1 | 60 | 2 | 1 | 2 | 3 | 1 |
| 50 | 197 | 1 | 55 | 2 | 1 | 2 | 3 | 1 |
| 51 | 198 | 1 | 48 | 2 | 1 | 3 | 3 | 1 |

|    |     |   |    |   |   |   |   |   |
|----|-----|---|----|---|---|---|---|---|
| 1  |     |   |    |   |   |   |   |   |
| 2  | 199 | 1 | 65 | 2 | 1 | 4 | 2 | 1 |
| 3  | 200 | 1 | 56 | 2 | 1 | 1 | 3 | 1 |
| 4  | 201 | 1 | 34 | 2 | 1 | 3 | 4 | 1 |
| 5  | 202 | 1 | 46 | 2 | 1 | 3 | 3 | 1 |
| 6  | 203 | 1 | 56 | 2 | 2 | 1 | 4 | 1 |
| 7  | 204 | 1 | 58 | 2 | 1 | 2 | 3 | 1 |
| 8  | 205 | 1 | 30 | 2 | 1 | 4 | 1 | 1 |
| 9  | 206 | 1 | 47 | 2 | 1 | 3 | 3 | 1 |
| 10 | 207 | 1 | 62 | 2 | 1 | 2 | 3 | 1 |
| 11 | 208 | 1 | 57 | 2 | 1 | 3 | 3 | 1 |
| 12 | 209 | 1 | 37 | 2 | 1 | 4 | 3 | 1 |
| 13 | 210 | 1 | 35 | 2 | 1 | 3 | 3 | 1 |
| 14 | 211 | 1 | 47 | 2 | 1 | 2 | 3 | 1 |
| 15 | 212 | 1 | 50 | 2 | 1 | 4 | 3 | 1 |
| 16 | 213 | 1 | 50 | 1 | 1 | 3 | 2 | 1 |
| 17 | 214 | 1 | 50 | 1 | 1 | 4 | 1 | 1 |
| 18 | 215 | 1 | 45 | 1 | 1 | 4 | 4 | 1 |
| 19 | 216 | 1 | 61 | 1 | 1 | 1 | 2 | 1 |
| 20 | 217 | 1 | 41 | 1 | 1 | 3 | 4 | 1 |
| 21 | 218 | 1 | 32 | 1 | 1 | 4 | 1 | 1 |
| 22 | 219 | 1 | 65 | 1 | 1 | 3 | 1 | 1 |
| 23 | 220 | 1 | 35 | 1 | 1 | 2 | 2 | 1 |
| 24 | 221 | 1 | 45 | 1 | 1 | 4 | 1 | 1 |
| 25 | 222 | 1 | 50 | 1 | 1 | 4 | 4 | 1 |
| 26 | 223 | 1 | 48 | 1 | 1 | 4 | 1 | 1 |
| 27 | 224 | 1 | 65 | 1 | 1 | 4 | 1 | 1 |
| 28 | 225 | 1 | 35 | 1 | 1 | 3 | 1 | 1 |
| 29 | 226 | 1 | 50 | 1 | 1 | 3 | 1 | 1 |
| 30 | 227 | 1 | 42 | 1 | 1 | 4 | 2 | 1 |
| 31 | 228 | 1 | 38 | 1 | 1 | 3 | 1 | 1 |
| 32 | 229 | 1 | 30 | 1 | 1 | 4 | 4 | 1 |
| 33 | 230 | 1 | 48 | 1 | 1 | 4 | 1 | 1 |
| 34 | 231 | 1 | 40 | 1 | 1 | 4 | 1 | 1 |
| 35 | 232 | 1 | 30 | 1 | 1 | 3 | 1 | 1 |
| 36 | 233 | 1 | 63 | 1 | 1 | 3 | 2 | 1 |
| 37 | 234 | 1 | 48 | 1 | 1 | 4 | 1 | 1 |
| 38 | 235 | 1 | 52 | 1 | 1 | 4 | 1 | 2 |
| 39 | 236 | 1 | 45 | 1 | 1 | 2 | 4 | 1 |
| 40 | 237 | 1 | 38 | 1 | 1 | 4 | 1 | 1 |
| 41 | 238 | 1 | 54 | 1 | 1 | 4 | 2 | 1 |
| 42 | 239 | 1 | 43 | 1 | 1 | 4 | 4 | 1 |
| 43 | 240 | 1 | 70 | 1 | 1 | 3 | 1 | 1 |
| 44 | 241 | 1 | 32 | 1 | 1 | 4 | 4 | 1 |
| 45 | 242 | 1 | 52 | 1 | 1 | 2 | 2 | 1 |
| 46 | 243 | 1 | 55 | 1 | 1 | 3 | 1 | 1 |
| 47 | 244 | 1 | 65 | 1 | 1 | 3 | 1 | 1 |
| 48 | 245 | 1 | 48 | 1 | 1 | 3 | 2 | 1 |
| 49 | 246 | 1 | 50 | 1 | 1 | 2 | 2 | 1 |
| 50 | 247 | 1 | 41 | 1 | 1 | 4 | 1 | 1 |
| 51 | 248 | 1 | 70 | 1 | 1 | 4 | 1 | 1 |

|    |     |   |    |   |   |   |   |   |
|----|-----|---|----|---|---|---|---|---|
| 1  |     |   |    |   |   |   |   |   |
| 2  | 249 | 1 | 70 | 1 | 1 | 3 | 2 | 1 |
| 3  | 250 | 1 | 45 | 1 | 1 | 2 | 2 | 1 |
| 4  | 251 | 1 | 40 | 1 | 1 | 4 | 3 | 1 |
| 5  | 252 | 1 | 52 | 1 | 1 | 3 | 3 | 1 |
| 6  | 253 | 1 | 36 | 1 | 1 | 2 | 3 | 1 |
| 7  | 254 | 1 | 25 | 1 | 1 | 4 | 3 | 1 |
| 8  | 255 | 1 | 45 | 1 | 1 | 3 | 2 | 1 |
| 9  | 256 | 1 | 67 | 1 | 1 | 4 | 1 | 1 |
| 10 | 257 | 1 | 65 | 1 | 1 | 4 | 4 | 1 |
| 11 | 258 | 1 | 58 | 1 | 1 | 1 | 2 | 1 |
| 12 | 259 | 1 | 48 | 1 | 1 | 3 | 4 | 1 |
| 13 | 260 | 1 | 58 | 1 | 1 | 2 | 2 | 1 |
| 14 | 261 | 1 | 54 | 1 | 1 | 4 | 3 | 1 |
| 15 | 262 | 1 | 45 | 1 | 1 | 3 | 3 | 1 |
| 16 | 263 | 1 | 55 | 1 | 1 | 2 | 3 | 1 |
| 17 | 264 | 1 | 48 | 1 | 1 | 4 | 3 | 1 |
| 18 | 265 | 1 | 40 | 1 | 1 | 3 | 2 | 1 |
| 19 | 266 | 1 | 42 | 1 | 1 | 4 | 1 | 1 |
| 20 | 267 | 1 | 60 | 1 | 1 | 4 | 4 | 1 |
| 21 | 268 | 1 | 40 | 1 | 1 | 1 | 2 | 1 |
| 22 | 269 | 1 | 40 | 1 | 1 | 3 | 4 | 1 |
| 23 | 270 | 1 | 38 | 1 | 1 | 4 | 1 | 1 |
| 24 | 271 | 1 | 72 | 2 | 2 | 1 | 3 | 1 |
| 25 | 272 | 1 | 30 | 2 | 1 | 3 | 3 | 1 |
| 26 | 273 | 1 | 48 | 2 | 1 | 2 | 3 | 1 |
| 27 | 274 | 1 | 56 | 2 | 2 | 2 | 3 | 1 |
| 28 | 275 | 1 | 40 | 2 | 1 | 2 | 3 | 1 |
| 29 | 276 | 1 | 30 | 2 | 1 | 1 | 3 | 1 |
| 30 | 277 | 1 | 63 | 2 | 1 | 1 | 3 | 1 |
| 31 | 278 | 1 | 48 | 2 | 1 | 1 | 3 | 1 |
| 32 | 279 | 1 | 52 | 2 | 1 | 1 | 3 | 1 |
| 33 | 280 | 1 | 55 | 2 | 2 | 2 | 3 | 1 |
| 34 | 281 | 1 | 45 | 2 | 1 | 2 | 3 | 1 |
| 35 | 282 | 1 | 40 | 2 | 1 | 1 | 3 | 1 |
| 36 | 283 | 1 | 50 | 2 | 2 | 1 | 3 | 1 |
| 37 | 284 | 1 | 38 | 2 | 1 | 3 | 3 | 1 |
| 38 | 285 | 1 | 30 | 2 | 1 | 2 | 3 | 1 |
| 39 | 286 | 1 | 58 | 2 | 2 | 2 | 3 | 1 |
| 40 | 287 | 1 | 48 | 1 | 1 | 2 | 3 | 1 |
| 41 | 288 | 1 | 40 | 1 | 1 | 3 | 4 | 1 |
| 42 | 289 | 1 | 30 | 1 | 1 | 3 | 3 | 1 |
| 43 | 290 | 1 | 62 | 1 | 2 | 1 | 4 | 1 |
| 44 | 291 | 1 | 63 | 1 | 1 | 2 | 3 | 1 |
| 45 | 292 | 1 | 48 | 1 | 1 | 4 | 1 | 1 |
| 46 | 293 | 1 | 52 | 1 | 1 | 3 | 3 | 1 |
| 47 | 294 | 1 | 45 | 1 | 1 | 2 | 3 | 1 |
| 48 | 295 | 1 | 45 | 1 | 2 | 3 | 3 | 1 |
| 49 | 296 | 1 | 38 | 1 | 1 | 3 | 1 | 1 |
| 50 | 297 | 1 | 30 | 1 | 1 | 3 | 3 | 1 |
| 51 | 298 | 1 | 43 | 1 | 1 | 2 | 3 | 1 |

|    |     |   |    |   |   |   |   |   |
|----|-----|---|----|---|---|---|---|---|
| 1  |     |   |    |   |   |   |   |   |
| 2  | 299 | 1 | 54 | 2 | 1 | 3 | 3 | 1 |
| 3  | 300 | 1 | 48 | 1 | 2 | 1 | 4 | 1 |
| 4  | 301 | 1 | 45 | 1 | 2 | 3 | 1 | 1 |
| 5  | 302 | 1 | 60 | 1 | 2 | 3 | 1 | 1 |
| 6  | 303 | 1 | 45 | 1 | 2 | 4 | 1 | 1 |
| 7  | 304 | 1 | 55 | 1 | 1 | 1 | 4 | 1 |
| 8  | 305 | 1 | 43 | 2 | 1 | 1 | 3 | 1 |
| 9  | 306 | 1 | 60 | 2 | 1 | 2 | 3 | 1 |
| 10 | 307 | 1 | 55 | 2 | 1 | 1 | 3 | 1 |
| 11 | 308 | 1 | 55 | 1 | 1 | 4 | 4 | 1 |
| 12 | 309 | 1 | 60 | 2 | 1 | 2 | 3 | 1 |
| 13 | 310 | 1 | 55 | 1 | 2 | 2 | 4 | 1 |
| 14 | 311 | 1 | 40 | 2 | 1 | 2 | 3 | 1 |
| 15 | 312 | 1 | 58 | 2 | 1 | 2 | 3 | 1 |
| 16 | 313 | 1 | 60 | 2 | 1 | 2 | 3 | 1 |
| 17 | 314 | 1 | 54 | 2 | 1 | 2 | 3 | 1 |
| 18 | 315 | 1 | 37 | 2 | 2 | 3 | 3 | 1 |
| 19 | 316 | 1 | 65 | 2 | 2 | 2 | 3 | 1 |
| 20 | 317 | 1 | 85 | 2 | 2 | 1 | 3 | 1 |
| 21 | 318 | 1 | 55 | 2 | 1 | 2 | 3 | 1 |
| 22 | 319 | 1 | 60 | 2 | 1 | 3 | 3 | 1 |
| 23 | 320 | 1 | 55 | 2 | 1 | 3 | 3 | 1 |
| 24 | 321 | 1 | 60 | 2 | 1 | 3 | 3 | 1 |
| 25 | 322 | 1 | 65 | 2 | 1 | 1 | 3 | 1 |
| 26 | 323 | 1 | 38 | 2 | 1 | 2 | 3 | 1 |
| 27 | 324 | 1 | 50 | 2 | 1 | 1 | 3 | 1 |
| 28 | 325 | 1 | 43 | 2 | 2 | 2 | 3 | 1 |
| 29 | 326 | 1 | 50 | 2 | 1 | 2 | 3 | 1 |
| 30 | 327 | 1 | 55 | 1 | 1 | 3 | 2 | 1 |
| 31 | 328 | 1 | 60 | 1 | 1 | 3 | 1 | 1 |
| 32 | 329 | 1 | 26 | 1 | 1 | 3 | 2 | 1 |
| 33 | 330 | 1 | 53 | 1 | 1 | 3 | 1 | 1 |
| 34 | 331 | 1 | 60 | 1 | 1 | 2 | 1 | 1 |
| 35 | 332 | 1 | 55 | 1 | 2 | 3 | 1 | 1 |
| 36 | 333 | 1 | 51 | 1 | 1 | 3 | 1 | 1 |
| 37 | 334 | 1 | 50 | 1 | 1 | 3 | 1 | 1 |
| 38 | 335 | 1 | 28 | 2 | 1 | 2 | 1 | 1 |
| 39 | 336 | 1 | 65 | 2 | 1 | 2 | 3 | 1 |
| 40 | 337 | 1 | 66 | 2 | 1 | 3 | 3 | 1 |
| 41 | 338 | 1 | 69 | 2 | 1 | 3 | 3 | 1 |
| 42 | 339 | 1 | 52 | 2 | 1 | 2 | 3 | 1 |
| 43 | 340 | 1 | 45 | 2 | 2 | 1 | 3 | 1 |
| 44 | 341 | 1 | 70 | 2 | 1 | 3 | 3 | 1 |
| 45 | 342 | 1 | 60 | 2 | 1 | 4 | 1 | 1 |
| 46 | 343 | 1 | 44 | 2 | 1 | 1 | 3 | 1 |
| 47 | 344 | 1 | 61 | 2 | 2 | 3 | 3 | 1 |
| 48 | 345 | 1 | 24 | 2 | 1 | 3 | 2 | 1 |
| 49 | 346 | 1 | 80 | 1 | 1 | 3 | 4 | 2 |
| 50 | 347 | 1 | 75 | 1 | 1 | 3 | 2 | 1 |
| 51 | 348 | 1 | 50 | 1 | 1 | 2 | 1 | 1 |

|    |     |   |    |   |   |   |   |   |
|----|-----|---|----|---|---|---|---|---|
| 1  |     |   |    |   |   |   |   |   |
| 2  | 349 | 1 | 56 | 1 | 1 | 1 | 3 | 1 |
| 3  | 350 | 1 | 55 | 1 | 1 | 2 | 1 | 1 |
| 4  | 351 | 1 | 50 | 1 | 2 | 4 | 1 | 1 |
| 5  | 352 | 1 | 17 | 1 | 2 | 4 | 1 | 1 |
| 6  |     |   |    |   |   |   |   |   |
| 7  | 353 | 1 | 40 | 1 | 1 | 4 | 1 | 1 |
| 8  | 354 | 1 | 47 | 1 | 1 | 3 | 2 | 2 |
| 9  | 355 | 1 | 30 | 1 | 1 | 3 | 1 | 1 |
| 10 | 356 | 1 | 31 | 2 | 1 | 2 | 3 | 1 |
| 11 | 357 | 1 | 50 | 2 | 1 | 4 | 1 | 1 |
| 12 |     |   |    |   |   |   |   |   |
| 13 | 358 | 1 | 50 | 2 | 1 | 3 | 3 | 1 |
| 14 | 359 | 1 | 40 | 2 | 1 | 2 | 3 | 1 |
| 15 | 360 | 1 | 60 | 2 | 1 | 3 | 3 | 2 |
| 16 | 361 | 1 | 50 | 2 | 1 | 1 | 3 | 1 |
| 17 | 362 | 1 | 35 | 2 | 1 | 3 | 3 | 1 |
| 18 |     |   |    |   |   |   |   |   |
| 19 | 363 | 1 | 44 | 2 | 1 | 2 | 3 | 1 |
| 20 | 364 | 1 | 45 | 2 | 2 | 1 | 3 | 1 |
| 21 | 365 | 1 | 35 | 2 | 1 | 2 | 3 | 1 |
| 22 | 366 | 1 | 35 | 2 | 1 | 2 | 3 | 1 |
| 23 |     |   |    |   |   |   |   |   |
| 24 | 367 | 1 | 53 | 2 | 1 | 1 | 3 | 1 |
| 25 | 368 | 1 | 57 | 2 | 1 | 4 | 3 | 1 |
| 26 | 369 | 1 | 56 | 2 | 1 | 2 | 3 | 1 |
| 27 | 370 | 1 | 55 | 2 | 1 | 4 | 3 | 1 |
| 28 | 371 | 1 | 60 | 2 | 1 | 4 | 1 | 1 |
| 29 |     |   |    |   |   |   |   |   |
| 30 | 372 | 1 | 50 | 2 | 1 | 1 | 1 | 1 |
| 31 | 373 | 1 | 62 | 2 | 1 | 2 | 3 | 1 |
| 32 | 374 | 1 | 62 | 2 | 1 | 3 | 3 | 1 |
| 33 | 375 | 1 | 45 | 2 | 1 | 3 | 3 | 1 |
| 34 | 376 | 1 | 50 | 2 | 1 | 3 | 3 | 1 |
| 35 |     |   |    |   |   |   |   |   |
| 36 | 377 | 1 | 50 | 2 | 1 | 2 | 3 | 1 |
| 37 | 378 | 1 | 52 | 2 | 1 | 3 | 3 | 1 |
| 38 | 379 | 1 | 33 | 2 | 1 | 3 | 3 | 2 |
| 39 | 380 | 1 | 51 | 2 | 2 | 2 | 3 | 1 |
| 40 | 381 | 1 | 25 | 2 | 1 | 1 | 3 | 1 |
| 41 | 382 | 1 | 45 | 2 | 1 | 1 | 3 | 1 |
| 42 | 383 | 1 | 32 | 2 | 1 | 2 | 3 | 1 |
| 43 | 384 | 1 | 63 | 2 | 1 | 2 | 3 | 1 |
| 44 |     |   |    |   |   |   |   |   |
| 45 | 385 | 1 | 45 | 2 | 1 | 4 | 3 | 1 |
| 46 | 386 | 1 | 41 | 2 | 1 | 2 | 3 | 1 |
| 47 | 387 | 1 | 40 | 2 | 1 | 3 | 3 | 1 |
| 48 | 388 | 1 | 62 | 2 | 1 | 2 | 3 | 1 |
| 49 | 389 | 1 | 62 | 2 | 1 | 2 | 3 | 1 |
| 50 |     |   |    |   |   |   |   |   |
| 51 | 390 | 1 | 65 | 1 | 1 | 4 | 4 | 1 |
| 52 | 391 | 1 | 60 | 1 | 1 | 4 | 1 | 1 |
| 53 | 392 | 1 | 50 | 1 | 1 | 4 | 1 | 1 |
| 54 | 393 | 1 | 35 | 1 | 1 | 4 | 1 | 1 |
| 55 | 394 | 1 | 65 | 1 | 1 | 4 | 1 | 1 |
| 56 | 395 | 1 | 60 | 1 | 1 | 3 | 2 | 1 |
| 57 | 396 | 1 | 52 | 1 | 1 | 4 | 1 | 1 |
| 58 |     |   |    |   |   |   |   |   |
| 59 | 397 | 1 | 64 | 1 | 1 | 4 | 1 | 1 |
| 60 | 398 | 1 | 42 | 1 | 1 | 4 | 1 | 1 |

|    |     |   |    |   |   |   |   |   |
|----|-----|---|----|---|---|---|---|---|
| 1  |     |   |    |   |   |   |   |   |
| 2  | 399 | 1 | 48 | 1 | 1 | 4 | 1 | 1 |
| 3  | 400 | 1 | 40 | 1 | 1 | 3 | 1 | 1 |
| 4  | 401 | 1 | 53 | 1 | 1 | 3 | 1 | 1 |
| 5  | 402 | 1 | 45 | 1 | 1 | 2 | 4 | 1 |
| 6  |     |   |    |   |   |   |   |   |
| 7  | 403 | 1 | 65 | 1 | 1 | 4 | 4 | 1 |
| 8  | 404 | 1 | 60 | 1 | 1 | 3 | 2 | 1 |
| 9  | 405 | 1 | 60 | 1 | 1 | 4 | 1 | 1 |
| 10 | 406 | 1 | 47 | 1 | 1 | 3 | 2 | 1 |
| 11 | 407 | 1 | 38 | 1 | 1 | 3 | 2 | 1 |
| 12 | 408 | 1 | 60 | 1 | 1 | 4 | 2 | 1 |
| 13 | 409 | 1 | 80 | 1 | 1 | 3 | 2 | 1 |
| 14 | 410 | 1 | 38 | 2 | 1 | 2 | 3 | 1 |
| 15 | 411 | 1 | 68 | 2 | 1 | 3 | 3 | 1 |
| 16 | 412 | 1 | 41 | 2 | 1 | 3 | 3 | 1 |
| 17 | 413 | 1 | 47 | 2 | 1 | 3 | 3 | 1 |
| 18 | 414 | 1 | 40 | 2 | 1 | 3 | 3 | 1 |
| 19 | 415 | 1 | 68 | 2 | 1 | 4 | 4 | 1 |
| 20 | 416 | 1 | 49 | 2 | 1 | 3 | 3 | 1 |
| 21 | 417 | 1 | 36 | 2 | 1 | 1 | 3 | 1 |
| 22 | 418 | 1 | 57 | 2 | 1 | 2 | 3 | 1 |
| 23 | 419 | 1 | 60 | 2 | 1 | 3 | 1 | 1 |
| 24 | 420 | 1 | 60 | 2 | 1 | 2 | 3 | 1 |
| 25 | 421 | 1 | 45 | 2 | 1 | 2 | 3 | 1 |
| 26 | 422 | 1 | 67 | 1 | 1 | 3 | 4 | 1 |
| 27 | 423 | 1 | 65 | 1 | 1 | 4 | 1 | 1 |
| 28 | 424 | 1 | 80 | 1 | 1 | 4 | 1 | 1 |
| 29 | 425 | 1 | 30 | 1 | 1 | 3 | 2 | 1 |
| 30 | 426 | 1 | 65 | 1 | 1 | 3 | 4 | 1 |
| 31 | 427 | 1 | 40 | 1 | 1 | 3 | 2 | 1 |
| 32 | 428 | 1 | 50 | 1 | 1 | 4 | 1 | 1 |
| 33 | 429 | 1 | 28 | 1 | 1 | 4 | 4 | 1 |
| 34 | 430 | 1 | 53 | 1 | 1 | 3 | 1 | 1 |
| 35 | 431 | 1 | 67 | 1 | 1 | 3 | 4 | 1 |
| 36 | 432 | 1 | 60 | 1 | 1 | 3 | 4 | 1 |
| 37 | 433 | 1 | 65 | 1 | 1 | 4 | 1 | 1 |
| 38 | 434 | 1 | 46 | 1 | 1 | 3 | 4 | 1 |
| 39 | 435 | 1 | 72 | 1 | 1 | 3 | 2 | 1 |
| 40 | 436 | 1 | 68 | 1 | 1 | 4 | 4 | 1 |
| 41 | 437 | 1 | 39 | 1 | 1 | 4 | 2 | 1 |
| 42 | 438 | 1 | 31 | 1 | 1 | 3 | 2 | 1 |
| 43 | 439 | 1 | 74 | 1 | 1 | 3 | 1 | 1 |
| 44 | 440 | 1 | 61 | 1 | 1 | 4 | 4 | 1 |
| 45 | 441 | 1 | 51 | 1 | 1 | 2 | 1 | 1 |
| 46 | 442 | 1 | 59 | 1 | 1 | 3 | 2 | 1 |
| 47 | 443 | 1 | 80 | 1 | 1 | 4 | 1 | 1 |
| 48 | 444 | 1 | 89 | 1 | 1 | 3 | 2 | 1 |
| 49 | 445 | 1 | 50 | 1 | 2 | 3 | 4 | 1 |
| 50 | 446 | 1 | 62 | 1 | 1 | 3 | 2 | 1 |
| 51 | 447 | 1 | 55 | 1 | 1 | 3 | 2 | 1 |
| 52 | 448 | 1 | 70 | 1 | 1 | 3 | 1 | 1 |

|    |     |   |    |   |   |   |   |   |
|----|-----|---|----|---|---|---|---|---|
| 1  |     |   |    |   |   |   |   |   |
| 2  | 449 | 1 | 65 | 1 | 1 | 2 | 3 | 1 |
| 3  | 450 | 1 | 48 | 1 | 1 | 2 | 3 | 1 |
| 4  | 451 | 1 | 44 | 2 | 1 | 2 | 3 | 1 |
| 5  | 452 | 1 | 48 | 2 | 1 | 2 | 3 | 1 |
| 6  | 453 | 1 | 56 | 2 | 1 | 2 | 3 | 1 |
| 7  | 454 | 1 | 48 | 2 | 1 | 1 | 3 | 1 |
| 8  | 455 | 1 | 40 | 2 | 1 | 2 | 3 | 1 |
| 9  | 456 | 1 | 55 | 2 | 1 | 2 | 3 | 1 |
| 10 | 457 | 1 | 40 | 2 | 1 | 2 | 3 | 1 |
| 11 | 458 | 1 | 47 | 2 | 1 | 3 | 3 | 1 |
| 12 | 459 | 1 | 41 | 2 | 1 | 1 | 3 | 1 |
| 13 | 460 | 1 | 52 | 2 | 1 | 2 | 3 | 1 |
| 14 | 461 | 1 | 46 | 2 | 1 | 2 | 3 | 1 |
| 15 | 462 | 1 | 56 | 2 | 1 | 3 | 3 | 1 |
| 16 | 463 | 1 | 39 | 2 | 1 | 2 | 3 | 1 |
| 17 | 464 | 1 | 60 | 2 | 1 | 2 | 3 | 1 |
| 18 | 465 | 1 | 60 | 2 | 1 | 3 | 3 | 1 |
| 19 | 466 | 1 | 41 | 2 | 1 | 3 | 3 | 1 |
| 20 | 467 | 1 | 58 | 2 | 1 | 2 | 3 | 1 |
| 21 | 468 | 1 | 46 | 2 | 1 | 3 | 3 | 1 |
| 22 | 469 | 1 | 59 | 2 | 1 | 4 | 4 | 1 |
| 23 | 470 | 1 | 39 | 2 | 1 | 3 | 3 | 1 |
| 24 | 471 | 1 | 50 | 2 | 1 | 4 | 4 | 1 |
| 25 | 472 | 1 | 59 | 2 | 1 | 2 | 3 | 1 |
| 26 | 473 | 1 | 50 | 2 | 1 | 2 | 3 | 1 |
| 27 | 474 | 1 | 55 | 2 | 1 | 3 | 3 | 1 |
| 28 | 475 | 1 | 67 | 2 | 1 | 3 | 3 | 1 |
| 29 | 476 | 1 | 56 | 2 | 1 | 3 | 3 | 1 |
| 30 | 477 | 1 | 70 | 2 | 1 | 2 | 2 | 1 |
| 31 | 478 | 1 | 70 | 2 | 1 | 1 | 3 | 1 |
| 32 | 479 | 1 | 59 | 2 | 1 | 2 | 3 | 1 |
| 33 | 480 | 1 | 41 | 2 | 1 | 4 | 4 | 1 |
| 34 | 481 | 1 | 50 | 2 | 1 | 2 | 3 | 1 |
| 35 | 482 | 1 | 57 | 2 | 1 | 3 | 3 | 1 |
| 36 | 483 | 1 | 66 | 2 | 1 | 1 | 3 | 1 |
| 37 | 484 | 1 | 43 | 2 | 1 | 2 | 3 | 1 |
| 38 | 485 | 1 | 42 | 2 | 1 | 3 | 3 | 1 |
| 39 | 486 | 1 | 50 | 2 | 1 | 3 | 3 | 1 |
| 40 | 487 | 1 | 66 | 2 | 1 | 2 | 3 | 1 |
| 41 | 488 | 1 | 65 | 2 | 1 | 3 | 3 | 1 |
| 42 | 489 | 1 | 39 | 2 | 1 | 3 | 3 | 1 |
| 43 | 490 | 1 | 60 | 2 | 1 | 3 | 3 | 1 |
| 44 | 491 | 1 | 46 | 2 | 1 | 2 | 4 | 1 |
| 45 | 492 | 1 | 65 | 2 | 2 | 3 | 3 | 1 |
| 46 | 493 | 1 | 45 | 1 | 1 | 3 | 4 | 1 |
| 47 | 494 | 1 | 50 | 2 | 1 | 2 | 3 | 1 |
| 48 | 495 | 1 | 62 | 2 | 1 | 2 | 3 | 1 |
| 49 | 496 | 1 | 55 | 1 | 1 | 4 | 1 | 1 |
| 50 | 497 | 1 | 62 | 2 | 1 | 2 | 3 | 1 |
| 51 | 498 | 1 | 50 | 1 | 1 | 4 | 1 | 1 |

|    |     |   |    |   |   |   |   |   |
|----|-----|---|----|---|---|---|---|---|
| 1  |     |   |    |   |   |   |   |   |
| 2  | 499 | 1 | 65 | 2 | 1 | 2 | 3 | 1 |
| 3  | 500 | 1 | 45 | 2 | 1 | 3 | 3 | 1 |
| 4  | 501 | 1 | 58 | 1 | 1 | 3 | 1 | 1 |
| 5  | 502 | 1 | 49 | 1 | 1 | 3 | 3 | 1 |
| 6  |     |   |    |   |   |   |   |   |
| 7  | 503 | 1 | 46 | 2 | 1 | 2 | 3 | 1 |
| 8  | 504 | 1 | 37 | 2 | 1 | 2 | 3 | 1 |
| 9  | 505 | 1 | 50 | 1 | 1 | 1 | 3 | 1 |
| 10 | 506 | 1 | 51 | 2 | 1 | 1 | 2 | 1 |
| 11 | 507 | 1 | 43 | 2 | 1 | 4 | 3 | 1 |
| 12 | 508 | 1 | 40 | 2 | 1 | 1 | 3 | 1 |
| 13 | 509 | 1 | 55 | 2 | 1 | 3 | 3 | 1 |
| 14 | 510 | 1 | 48 | 2 | 1 | 4 | 3 | 1 |
| 15 | 511 | 1 | 65 | 2 | 1 | 2 | 3 | 1 |
| 16 | 512 | 1 | 56 | 2 | 1 | 1 | 3 | 1 |
| 17 | 513 | 1 | 50 | 2 | 1 | 3 | 3 | 1 |
| 18 | 514 | 1 | 35 | 2 | 1 | 3 | 1 | 1 |
| 19 | 515 | 1 | 60 | 2 | 1 | 3 | 3 | 1 |
| 20 | 516 | 1 | 53 | 2 | 1 | 3 | 3 | 1 |
| 21 | 517 | 1 | 62 | 2 | 1 | 1 | 3 | 1 |
| 22 | 518 | 1 | 52 | 2 | 1 | 3 | 3 | 1 |
| 23 | 519 | 1 | 63 | 2 | 1 | 2 | 3 | 1 |
| 24 | 520 | 1 | 42 | 2 | 1 | 1 | 3 | 1 |
| 25 | 521 | 1 | 45 | 2 | 2 | 2 | 3 | 1 |
| 26 | 522 | 1 | 50 | 2 | 1 | 1 | 3 | 1 |
| 27 | 523 | 1 | 80 | 2 | 1 | 3 | 4 | 1 |
| 28 | 524 | 1 | 44 | 2 | 1 | 2 | 3 | 1 |
| 29 | 525 | 1 | 72 | 2 | 1 | 2 | 3 | 1 |
| 30 | 526 | 1 | 45 | 2 | 1 | 2 | 3 | 1 |
| 31 | 527 | 1 | 60 | 2 | 1 | 3 | 3 | 1 |
| 32 | 528 | 1 | 50 | 2 | 1 | 1 | 3 | 1 |
| 33 | 529 | 1 | 31 | 2 | 1 | 3 | 3 | 1 |
| 34 | 530 | 1 | 55 | 2 | 1 | 2 | 3 | 1 |
| 35 | 531 | 1 | 50 | 2 | 1 | 2 | 3 | 1 |
| 36 | 532 | 1 | 40 | 2 | 1 | 2 | 3 | 1 |
| 37 | 533 | 1 | 48 | 2 | 1 | 2 | 3 | 1 |
| 38 | 534 | 1 | 42 | 2 | 1 | 1 | 3 | 1 |
| 39 | 535 | 1 | 41 | 2 | 1 | 3 | 3 | 1 |
| 40 | 536 | 1 | 62 | 2 | 1 | 2 | 3 | 1 |
| 41 | 537 | 1 | 50 | 2 | 1 | 2 | 3 | 1 |
| 42 | 538 | 1 | 58 | 2 | 1 | 2 | 3 | 1 |
| 43 | 539 | 1 | 65 | 2 | 2 | 1 | 3 | 1 |
| 44 | 540 | 1 | 56 | 2 | 1 | 2 | 3 | 1 |
| 45 | 541 | 1 | 37 | 1 | 1 | 3 | 3 | 1 |
| 46 | 542 | 1 | 30 | 2 | 1 | 1 | 3 | 1 |
| 47 | 543 | 1 | 55 | 2 | 1 | 2 | 3 | 1 |
| 48 | 544 | 1 | 55 | 2 | 1 | 2 | 3 | 1 |
| 49 | 545 | 1 | 49 | 1 | 1 | 2 | 3 | 1 |
| 50 | 546 | 1 | 33 | 1 | 1 | 3 | 1 | 1 |
| 51 | 547 | 1 | 70 | 1 | 1 | 2 | 3 | 1 |
| 52 | 548 | 1 | 55 | 2 | 1 | 2 | 3 | 1 |



|    |     |   |    |   |   |   |   |   |
|----|-----|---|----|---|---|---|---|---|
| 1  |     |   |    |   |   |   |   |   |
| 2  | 549 | 1 | 55 | 1 | 1 | 1 | 1 | 1 |
| 3  | 550 | 1 | 70 | 1 | 1 | 4 | 1 | 1 |
| 4  | 551 | 1 | 60 | 2 | 1 | 2 | 1 | 1 |
| 5  | 552 | 1 | 40 | 2 | 1 | 2 | 3 | 1 |
| 6  | 553 | 1 | 40 | 1 | 1 | 2 | 3 | 1 |
| 7  | 554 | 1 | 16 | 2 | 2 | 2 | 3 | 1 |
| 8  | 555 | 1 | 50 | 2 | 1 | 2 | 3 | 1 |
| 9  | 556 | 1 | 32 | 2 | 1 | 2 | 3 | 1 |
| 10 | 557 | 1 | 29 | 2 | 1 | 1 | 3 | 1 |
| 11 | 558 | 1 | 54 | 2 | 1 | 2 | 3 | 1 |
| 12 | 559 | 1 | 60 | 1 | 1 | 2 | 2 | 1 |
| 13 | 560 | 1 | 40 | 1 | 1 | 4 | 2 | 1 |
| 14 | 561 | 1 | 42 | 2 | 1 | 1 | 3 | 1 |
| 15 | 562 | 1 | 54 | 2 | 1 | 3 | 3 | 1 |
| 16 | 563 | 1 | 42 | 2 | 1 | 2 | 3 | 1 |
| 17 | 564 | 1 | 41 | 2 | 1 | 1 | 3 | 1 |
| 18 | 565 | 1 | 31 | 2 | 1 | 1 | 3 | 1 |
| 19 | 566 | 1 | 70 | 2 | 1 | 3 | 3 | 1 |
| 20 | 567 | 1 | 40 | 2 | 1 | 2 | 3 | 1 |
| 21 | 568 | 1 | 42 | 2 | 1 | 1 | 3 | 1 |
| 22 | 569 | 1 | 92 | 2 | 1 | 2 | 3 | 1 |
| 23 | 570 | 1 | 55 | 2 | 1 | 3 | 3 | 1 |
| 24 | 571 | 1 | 58 | 2 | 1 | 2 | 3 | 1 |
| 25 | 572 | 1 | 56 | 1 | 1 | 2 | 3 | 1 |
| 26 | 573 | 1 | 30 | 2 | 1 | 2 | 3 | 1 |
| 27 | 574 | 1 | 40 | 2 | 2 | 2 | 3 | 1 |
| 28 | 575 | 1 | 35 | 2 | 1 | 1 | 3 | 1 |
| 29 | 576 | 1 | 75 | 2 | 1 | 2 | 3 | 1 |
| 30 | 577 | 1 | 55 | 2 | 1 | 4 | 3 | 1 |
| 31 | 578 | 1 | 50 | 2 | 1 | 1 | 3 | 2 |
| 32 | 579 | 1 | 62 | 1 | 1 | 3 | 2 | 1 |
| 33 | 580 | 1 | 55 | 2 | 1 | 2 | 3 | 1 |
| 34 | 581 | 1 | 52 | 1 | 1 | 4 | 1 | 1 |
| 35 | 582 | 1 | 55 | 2 | 1 | 2 | 3 | 1 |
| 36 | 583 | 1 | 50 | 2 | 1 | 3 | 1 | 1 |
| 37 | 584 | 1 | 81 | 1 | 1 | 3 | 2 | 1 |
| 38 | 585 | 1 | 62 | 1 | 1 | 3 | 1 | 1 |
| 39 | 586 | 1 | 50 | 1 | 1 | 1 | 3 | 1 |
| 40 | 587 | 1 | 45 | 2 | 1 | 1 | 3 | 1 |
| 41 | 588 | 1 | 44 | 2 | 1 | 2 | 3 | 1 |
| 42 | 589 | 1 | 42 | 1 | 1 | 2 | 1 | 1 |
| 43 | 590 | 1 | 55 | 1 | 1 | 2 | 2 | 1 |
| 44 | 591 | 1 | 60 | 1 | 1 | 2 | 2 | 1 |
| 45 | 592 | 1 | 47 | 1 | 2 | 1 | 3 | 1 |
| 46 | 593 | 1 | 45 | 2 | 1 | 2 | 3 | 1 |
| 47 | 594 | 1 | 61 | 1 | 1 | 2 | 4 | 1 |
| 48 | 595 | 1 | 57 | 2 | 1 | 2 | 3 | 1 |
| 49 | 596 | 1 | 30 | 1 | 1 | 2 | 2 | 1 |
| 50 | 597 | 1 | 42 | 2 | 1 | 2 | 3 | 1 |
| 51 | 598 | 1 | 75 | 2 | 1 | 3 | 3 | 1 |

|    |     |   |    |   |   |   |   |   |
|----|-----|---|----|---|---|---|---|---|
| 1  |     |   |    |   |   |   |   |   |
| 2  | 599 | 1 | 40 | 2 | 2 | 1 | 3 | 1 |
| 3  | 600 | 1 | 47 | 1 | 2 | 2 | 2 | 1 |
| 4  | 601 | 1 | 47 | 2 | 1 | 2 | 3 | 1 |
| 5  | 602 | 1 | 50 | 2 | 1 | 2 | 3 | 1 |
| 6  | 603 | 1 | 50 | 1 | 1 | 2 | 1 | 1 |
| 7  | 604 | 1 | 63 | 2 | 2 | 2 | 3 | 1 |
| 8  | 605 | 1 | 55 | 2 | 1 | 2 | 3 | 1 |
| 9  | 606 | 1 | 52 | 2 | 1 | 2 | 3 | 1 |
| 10 | 607 | 1 | 40 | 2 | 1 | 3 | 3 | 1 |
| 11 | 608 | 1 | 47 | 2 | 1 | 3 | 3 | 1 |
| 12 | 609 | 1 | 50 | 2 | 1 | 2 | 3 | 1 |
| 13 | 610 | 1 | 55 | 1 | 1 | 2 | 1 | 1 |
| 14 | 611 | 1 | 60 | 2 | 1 | 1 | 3 | 1 |
| 15 | 612 | 1 | 52 | 2 | 1 | 3 | 2 | 1 |
| 16 | 613 | 1 | 51 | 2 | 1 | 2 | 3 | 1 |
| 17 | 614 | 1 | 40 | 1 | 1 | 4 | 1 | 1 |
| 18 | 615 | 1 | 52 | 1 | 1 | 2 | 2 | 1 |
| 19 | 616 | 1 | 40 | 1 | 1 | 2 | 3 | 1 |
| 20 | 617 | 1 | 70 | 2 | 1 | 3 | 3 | 1 |
| 21 | 618 | 1 | 82 | 2 | 1 | 2 | 3 | 1 |
| 22 | 619 | 1 | 40 | 1 | 1 | 1 | 1 | 1 |
| 23 | 620 | 1 | 40 | 2 | 1 | 1 | 1 | 1 |
| 24 | 621 | 1 | 50 | 2 | 1 | 3 | 1 | 1 |
| 25 | 622 | 1 | 50 | 1 | 1 | 1 | 2 | 1 |
| 26 | 623 | 1 | 55 | 2 | 1 | 3 | 3 | 1 |
| 27 | 624 | 1 | 50 | 1 | 1 | 2 | 2 | 1 |
| 28 | 625 | 1 | 81 | 2 | 2 | 2 | 3 | 1 |
| 29 | 626 | 1 | 57 | 2 | 1 | 2 | 3 | 1 |
| 30 | 627 | 1 | 55 | 2 | 1 | 2 | 3 | 1 |
| 31 | 628 | 1 | 55 | 1 | 1 | 4 | 1 | 1 |
| 32 | 629 | 1 | 55 | 1 | 1 | 3 | 1 | 1 |
| 33 | 630 | 1 | 60 | 2 | 1 | 1 | 3 | 1 |
| 34 | 631 | 1 | 55 | 1 | 1 | 3 | 2 | 1 |
| 35 | 632 | 1 | 35 | 1 | 1 | 2 | 1 | 1 |
| 36 | 633 | 1 | 48 | 2 | 1 | 3 | 3 | 1 |
| 37 | 634 | 1 | 66 | 2 | 1 | 1 | 3 | 1 |
| 38 | 635 | 1 | 45 | 2 | 1 | 2 | 3 | 1 |
| 39 | 636 | 1 | 47 | 1 | 1 | 2 | 1 | 1 |
| 40 | 637 | 1 | 48 | 1 | 1 | 2 | 1 | 1 |
| 41 | 638 | 1 | 60 | 1 | 1 | 3 | 2 | 1 |
| 42 | 639 | 1 | 70 | 2 | 1 | 2 | 3 | 1 |
| 43 | 640 | 1 | 60 | 1 | 1 | 2 | 2 | 1 |
| 44 | 641 | 2 | 50 | 2 | 2 | 2 | 3 | 1 |
| 45 | 642 | 2 | 58 | 2 | 2 | 2 | 3 | 1 |
| 46 | 643 | 2 | 65 | 2 | 2 | 3 | 3 | 1 |
| 47 | 644 | 2 | 50 | 1 | 1 | 2 | 2 | 1 |
| 48 | 645 | 2 | 50 | 2 | 2 | 1 | 3 | 1 |
| 49 | 646 | 2 | 52 | 2 | 2 | 1 | 3 | 1 |
| 50 | 647 | 2 | 50 | 2 | 2 | 2 | 3 | 1 |
| 51 | 648 | 2 | 32 | 2 | 2 | 2 | 3 | 1 |

|    |     |   |    |   |   |   |   |   |
|----|-----|---|----|---|---|---|---|---|
| 1  |     |   |    |   |   |   |   |   |
| 2  | 649 | 2 | 55 | 2 | 2 | 2 | 3 | 1 |
| 3  | 650 | 2 | 48 | 2 | 2 | 1 | 3 | 1 |
| 4  | 651 | 2 | 50 | 2 | 2 | 3 | 3 | 1 |
| 5  | 652 | 2 | 58 | 2 | 2 | 2 | 3 | 1 |
| 6  | 653 | 2 | 42 | 2 | 2 | 1 | 3 | 1 |
| 7  | 654 | 2 | 32 | 2 | 1 | 3 | 3 | 1 |
| 8  | 655 | 2 | 42 | 2 | 1 | 2 | 3 | 1 |
| 9  | 656 | 2 | 34 | 2 | 2 | 2 | 3 | 1 |
| 10 | 657 | 2 | 60 | 2 | 2 | 1 | 3 | 1 |
| 11 | 658 | 2 | 60 | 2 | 1 | 3 | 3 | 1 |
| 12 | 659 | 2 | 55 | 2 | 2 | 1 | 3 | 1 |
| 13 | 660 | 2 | 50 | 2 | 2 | 1 | 3 | 1 |
| 14 | 661 | 2 | 64 | 2 | 2 | 3 | 3 | 1 |
| 15 | 662 | 2 | 55 | 2 | 2 | 2 | 3 | 1 |
| 16 | 663 | 2 | 39 | 2 | 2 | 2 | 3 | 1 |
| 17 | 664 | 2 | 70 | 2 | 2 | 1 | 3 | 1 |
| 18 | 665 | 2 | 50 | 2 | 2 | 2 | 3 | 1 |
| 19 | 666 | 2 | 54 | 2 | 2 | 3 | 3 | 1 |
| 20 | 667 | 2 | 53 | 1 | 2 | 4 | 1 | 1 |
| 21 | 668 | 2 | 30 | 1 | 1 | 3 | 1 | 1 |
| 22 | 669 | 2 | 50 | 1 | 2 | 2 | 4 | 1 |
| 23 | 670 | 2 | 38 | 1 | 1 | 1 | 2 | 1 |
| 24 | 671 | 2 | 61 | 1 | 1 | 2 | 1 | 1 |
| 25 | 672 | 2 | 52 | 1 | 2 | 3 | 4 | 1 |
| 26 | 673 | 2 | 30 | 1 | 2 | 3 | 1 | 1 |
| 27 | 674 | 2 | 45 | 1 | 2 | 3 | 4 | 1 |
| 28 | 675 | 2 | 38 | 1 | 2 | 3 | 2 | 1 |
| 29 | 676 | 2 | 50 | 1 | 2 | 1 | 2 | 1 |
| 30 | 677 | 2 | 50 | 1 | 1 | 4 | 2 | 1 |
| 31 | 678 | 2 | 55 | 1 | 1 | 2 | 2 | 1 |
| 32 | 679 | 2 | 45 | 1 | 1 | 2 | 2 | 1 |
| 33 | 680 | 2 | 42 | 1 | 1 | 2 | 2 | 1 |
| 34 | 681 | 2 | 45 | 1 | 2 | 1 | 4 | 1 |
| 35 | 682 | 2 | 30 | 1 | 2 | 1 | 2 | 1 |
| 36 | 683 | 2 | 45 | 1 | 2 | 3 | 4 | 1 |
| 37 | 684 | 2 | 50 | 1 | 2 | 2 | 2 | 1 |
| 38 | 685 | 2 | 65 | 1 | 1 | 2 | 4 | 1 |
| 39 | 686 | 2 | 70 | 1 | 1 | 3 | 1 | 1 |
| 40 | 687 | 2 | 50 | 1 | 2 | 1 | 4 | 1 |
| 41 | 689 | 2 | 50 | 1 | 1 | 2 | 2 | 1 |
| 42 | 690 | 2 | 31 | 1 | 2 | 3 | 2 | 1 |
| 43 | 691 | 2 | 62 | 1 | 2 | 4 | 4 | 1 |
| 44 | 692 | 2 | 35 | 1 | 2 | 3 | 2 | 1 |
| 45 | 693 | 2 | 45 | 1 | 2 | 4 | 2 | 1 |
| 46 | 694 | 2 | 35 | 1 | 2 | 3 | 4 | 1 |
| 47 | 695 | 2 | 50 | 1 | 2 | 2 | 4 | 1 |
| 48 | 696 | 2 | 50 | 1 | 2 | 1 | 4 | 1 |
| 49 | 697 | 2 | 59 | 1 | 2 | 2 | 4 | 1 |
| 50 | 698 | 2 | 35 | 1 | 1 | 1 | 4 | 1 |
| 51 | 699 | 2 | 60 | 1 | 2 | 1 | 4 | 1 |

|    |     |   |    |   |   |   |   |   |
|----|-----|---|----|---|---|---|---|---|
| 1  |     |   |    |   |   |   |   |   |
| 2  | 700 | 2 | 40 | 1 | 1 | 4 | 4 | 1 |
| 3  | 701 | 2 | 42 | 1 | 2 | 3 | 1 | 1 |
| 4  | 702 | 2 | 48 | 1 | 1 | 3 | 4 | 1 |
| 5  | 702 | 2 | 30 | 1 | 1 | 3 | 4 | 1 |
| 6  |     |   |    |   |   |   |   |   |
| 7  | 703 | 2 | 35 | 1 | 2 | 2 | 2 | 1 |
| 8  | 704 | 2 | 50 | 1 | 2 | 4 | 4 | 1 |
| 9  | 705 | 2 | 35 | 1 | 2 | 4 | 4 | 1 |
| 10 | 706 | 2 | 55 | 1 | 2 | 2 | 2 | 1 |
| 11 | 707 | 2 | 46 | 1 | 2 | 3 | 4 | 1 |
| 12 |     |   |    |   |   |   |   |   |
| 13 | 708 | 2 | 50 | 1 | 2 | 4 | 4 | 1 |
| 14 | 709 | 2 | 35 | 1 | 2 | 2 | 2 | 1 |
| 15 | 710 | 2 | 52 | 1 | 2 | 2 | 3 | 1 |
| 16 | 711 | 2 | 24 | 1 | 2 | 4 | 2 | 1 |
| 17 | 712 | 2 | 65 | 1 | 2 | 3 | 4 | 1 |
| 18 |     |   |    |   |   |   |   |   |
| 19 | 713 | 2 | 40 | 1 | 2 | 3 | 2 | 1 |
| 20 | 714 | 2 | 55 | 1 | 1 | 4 | 1 | 1 |
| 21 | 715 | 2 | 40 | 1 | 2 | 3 | 4 | 1 |
| 22 | 716 | 2 | 45 | 1 | 2 | 4 | 4 | 1 |
| 23 |     |   |    |   |   |   |   |   |
| 24 | 717 | 2 | 51 | 1 | 2 | 4 | 4 | 1 |
| 25 | 718 | 2 | 52 | 1 | 2 | 2 | 4 | 1 |
| 26 | 719 | 2 | 40 | 1 | 1 | 4 | 1 | 1 |
| 27 | 720 | 2 | 35 | 1 | 1 | 2 | 4 | 1 |
| 28 | 721 | 2 | 55 | 1 | 2 | 3 | 4 | 1 |
| 29 |     |   |    |   |   |   |   |   |
| 30 | 722 | 2 | 65 | 1 | 1 | 4 | 1 | 1 |
| 31 | 723 | 2 | 32 | 1 | 2 | 4 | 4 | 1 |
| 32 | 724 | 2 | 43 | 1 | 2 | 4 | 1 | 1 |
| 33 | 725 | 2 | 30 | 1 | 1 | 1 | 4 | 1 |
| 34 | 726 | 2 | 45 | 1 | 2 | 4 | 1 | 1 |
| 35 |     |   |    |   |   |   |   |   |
| 36 | 727 | 2 | 50 | 1 | 2 | 3 | 4 | 1 |
| 37 | 728 | 2 | 60 | 1 | 1 | 3 | 2 | 1 |
| 38 | 729 | 2 | 60 | 1 | 1 | 2 | 1 | 1 |
| 39 | 730 | 2 | 45 | 1 | 2 | 3 | 2 | 1 |
| 40 | 731 | 2 | 50 | 1 | 1 | 3 | 2 | 1 |
| 41 | 732 | 2 | 54 | 1 | 1 | 4 | 1 | 1 |
| 42 | 733 | 2 | 59 | 1 | 1 | 4 | 2 | 1 |
| 43 |     |   |    |   |   |   |   |   |
| 44 | 734 | 2 | 80 | 2 | 1 | 2 | 3 | 1 |
| 45 | 735 | 2 | 45 | 1 | 2 | 4 | 1 | 1 |
| 46 | 736 | 2 | 32 | 1 | 2 | 2 | 1 | 1 |
| 47 | 737 | 2 | 62 | 1 | 2 | 2 | 4 | 1 |
| 48 | 738 | 2 | 46 | 1 | 2 | 3 | 2 | 1 |
| 49 | 739 | 2 | 45 | 1 | 1 | 3 | 2 | 1 |
| 50 |     |   |    |   |   |   |   |   |
| 51 | 740 | 2 | 40 | 1 | 1 | 2 | 2 | 1 |
| 52 | 741 | 2 | 40 | 1 | 2 | 3 | 1 | 1 |
| 53 |     |   |    |   |   |   |   |   |
| 54 | 742 | 2 | 35 | 1 | 2 | 2 | 4 | 1 |
| 55 | 743 | 2 | 58 | 1 | 1 | 3 | 4 | 1 |
| 56 | 744 | 2 | 50 | 1 | 1 | 4 | 4 | 1 |
| 57 | 745 | 2 | 32 | 1 | 2 | 4 | 1 | 1 |
| 58 | 746 | 2 | 49 | 1 | 2 | 3 | 4 | 1 |
| 59 | 747 | 2 | 65 | 2 | 1 | 3 | 3 | 1 |
| 60 | 748 | 2 | 52 | 2 | 2 | 4 | 3 | 1 |

|    |     |   |    |   |   |   |   |   |
|----|-----|---|----|---|---|---|---|---|
| 1  |     |   |    |   |   |   |   |   |
| 2  | 749 | 2 | 47 | 2 | 1 | 4 | 3 | 1 |
| 3  | 750 | 2 | 61 | 2 | 2 | 3 | 3 | 1 |
| 4  | 751 | 2 | 48 | 2 | 1 | 4 | 1 | 2 |
| 5  | 752 | 2 | 50 | 2 | 1 | 2 | 3 | 1 |
| 6  |     |   |    |   |   |   |   |   |
| 7  | 753 | 2 | 52 | 2 | 1 | 3 | 1 | 2 |
| 8  | 754 | 2 | 30 | 2 | 2 | 2 | 3 | 1 |
| 9  | 755 | 2 | 44 | 2 | 1 | 2 | 3 | 1 |
| 10 | 756 | 2 | 55 | 2 | 2 | 4 | 3 | 1 |
| 11 | 757 | 2 | 70 | 2 | 1 | 4 | 3 | 1 |
| 12 |     |   |    |   |   |   |   |   |
| 13 | 758 | 2 | 56 | 2 | 1 | 4 | 1 | 1 |
| 14 | 759 | 2 | 60 | 2 | 1 | 1 | 3 | 1 |
| 15 | 760 | 2 | 50 | 2 | 1 | 3 | 3 | 1 |
| 16 | 761 | 2 | 40 | 2 | 2 | 2 | 3 | 1 |
| 17 | 762 | 2 | 50 | 2 | 2 | 2 | 3 | 1 |
| 18 |     |   |    |   |   |   |   |   |
| 19 | 763 | 2 | 31 | 2 | 2 | 2 | 3 | 1 |
| 20 | 764 | 2 | 55 | 2 | 1 | 4 | 1 | 1 |
| 21 | 765 | 2 | 53 | 2 | 2 | 2 | 3 | 1 |
| 22 | 766 | 2 | 60 | 2 | 2 | 1 | 3 | 1 |
| 23 |     |   |    |   |   |   |   |   |
| 24 | 767 | 2 | 50 | 2 | 2 | 1 | 3 | 1 |
| 25 | 768 | 2 | 40 | 2 | 1 | 3 | 3 | 1 |
| 26 | 769 | 2 | 32 | 2 | 2 | 1 | 3 | 1 |
| 27 | 770 | 2 | 60 | 2 | 1 | 1 | 3 | 1 |
| 28 | 771 | 2 | 55 | 2 | 2 | 3 | 3 | 1 |
| 29 |     |   |    |   |   |   |   |   |
| 30 | 772 | 2 | 53 | 2 | 1 | 2 | 2 | 1 |
| 31 | 773 | 2 | 65 | 2 | 1 | 3 | 3 | 1 |
| 32 | 774 | 2 | 49 | 2 | 2 | 3 | 3 | 1 |
| 33 | 775 | 2 | 57 | 2 | 1 | 2 | 3 | 1 |
| 34 | 776 | 2 | 50 | 2 | 1 | 2 | 3 | 1 |
| 35 |     |   |    |   |   |   |   |   |
| 36 | 777 | 2 | 43 | 2 | 2 | 1 | 3 | 1 |
| 37 | 778 | 2 | 30 | 2 | 1 | 3 | 3 | 1 |
| 38 | 779 | 2 | 60 | 2 | 2 | 1 | 3 | 1 |
| 39 | 780 | 2 | 50 | 2 | 2 | 2 | 3 | 1 |
| 40 |     |   |    |   |   |   |   |   |
| 41 | 781 | 2 | 55 | 2 | 1 | 2 | 3 | 1 |
| 42 | 782 | 2 | 35 | 2 | 2 | 2 | 3 | 1 |
| 43 | 783 | 2 | 50 | 2 | 2 | 1 | 3 | 1 |
| 44 | 784 | 2 | 37 | 2 | 2 | 2 | 3 | 1 |
| 45 | 785 | 2 | 40 | 2 | 2 | 3 | 1 | 1 |
| 46 | 786 | 2 | 45 | 2 | 2 | 2 | 3 | 1 |
| 47 |     |   |    |   |   |   |   |   |
| 48 | 787 | 2 | 37 | 2 | 2 | 4 | 3 | 1 |
| 49 | 788 | 2 | 60 | 2 | 2 | 1 | 3 | 1 |
| 50 | 789 | 2 | 45 | 2 | 2 | 2 | 3 | 1 |
| 51 | 790 | 2 | 55 | 2 | 2 | 4 | 3 | 1 |
| 52 |     |   |    |   |   |   |   |   |
| 53 | 791 | 2 | 42 | 2 | 2 | 2 | 3 | 1 |
| 54 | 792 | 2 | 60 | 2 | 2 | 1 | 3 | 1 |
| 55 | 793 | 2 | 71 | 2 | 2 | 1 | 3 | 1 |
| 56 | 794 | 2 | 44 | 2 | 1 | 2 | 3 | 1 |
| 57 | 795 | 2 | 45 | 2 | 1 | 1 | 3 | 1 |
| 58 |     |   |    |   |   |   |   |   |
| 59 | 796 | 2 | 56 | 2 | 1 | 3 | 1 | 1 |
| 60 | 797 | 2 | 72 | 2 | 2 | 3 | 3 | 1 |
|    | 798 | 2 | 45 | 2 | 1 | 4 | 1 | 1 |

|    |     |   |    |   |   |   |   |   |
|----|-----|---|----|---|---|---|---|---|
| 1  |     |   |    |   |   |   |   |   |
| 2  | 799 | 2 | 38 | 2 | 1 | 2 | 2 | 1 |
| 3  | 800 | 2 | 60 | 2 | 2 | 3 | 3 | 1 |
| 4  | 801 | 2 | 46 | 2 | 2 | 2 | 3 | 1 |
| 5  | 802 | 2 | 50 | 2 | 2 | 2 | 3 | 1 |
| 6  | 803 | 2 | 49 | 2 | 2 | 3 | 3 | 1 |
| 7  | 804 | 2 | 45 | 2 | 1 | 3 | 1 | 1 |
| 8  | 805 | 2 | 54 | 2 | 2 | 2 | 3 | 1 |
| 9  | 806 | 2 | 55 | 2 | 2 | 2 | 3 | 1 |
| 10 | 807 | 2 | 60 | 2 | 2 | 2 | 3 | 1 |
| 11 | 808 | 2 | 60 | 2 | 1 | 2 | 3 | 1 |
| 12 | 809 | 2 | 27 | 2 | 1 | 3 | 3 | 1 |
| 13 | 810 | 2 | 61 | 2 | 2 | 2 | 3 | 1 |
| 14 | 811 | 2 | 55 | 2 | 2 | 3 | 3 | 1 |
| 15 | 812 | 2 | 50 | 2 | 1 | 2 | 1 | 1 |
| 16 | 813 | 2 | 35 | 2 | 1 | 3 | 3 | 1 |
| 17 | 814 | 2 | 60 | 2 | 2 | 3 | 3 | 1 |
| 18 | 815 | 2 | 45 | 2 | 1 | 3 | 3 | 1 |
| 19 | 816 | 2 | 60 | 2 | 2 | 1 | 4 | 1 |
| 20 | 817 | 2 | 40 | 2 | 2 | 1 | 3 | 1 |
| 21 | 818 | 2 | 50 | 2 | 1 | 4 | 1 | 1 |
| 22 | 819 | 2 | 55 | 2 | 2 | 2 | 3 | 1 |
| 23 | 820 | 2 | 55 | 2 | 2 | 2 | 4 | 1 |
| 24 | 821 | 2 | 62 | 2 | 2 | 2 | 3 | 1 |
| 25 | 822 | 2 | 55 | 2 | 1 | 1 | 3 | 1 |
| 26 | 823 | 2 | 50 | 2 | 2 | 2 | 3 | 1 |
| 27 | 824 | 2 | 70 | 2 | 1 | 2 | 3 | 1 |
| 28 | 825 | 2 | 65 | 2 | 2 | 2 | 3 | 1 |
| 29 | 826 | 2 | 72 | 1 | 2 | 3 | 2 | 1 |
| 30 | 827 | 2 | 60 | 1 | 2 | 3 | 4 | 1 |
| 31 | 828 | 2 | 45 | 1 | 2 | 3 | 1 | 1 |
| 32 | 829 | 2 | 55 | 1 | 2 | 3 | 4 | 1 |
| 33 | 830 | 2 | 56 | 1 | 2 | 3 | 2 | 1 |
| 34 | 831 | 2 | 40 | 1 | 2 | 2 | 4 | 1 |
| 35 | 832 | 2 | 42 | 1 | 2 | 3 | 1 | 1 |
| 36 | 833 | 2 | 59 | 2 | 2 | 2 | 3 | 1 |
| 37 | 834 | 2 | 42 | 2 | 1 | 3 | 3 | 1 |
| 38 | 835 | 2 | 65 | 2 | 1 | 3 | 3 | 1 |
| 39 | 836 | 2 | 54 | 2 | 2 | 1 | 3 | 1 |
| 40 | 837 | 2 | 52 | 2 | 2 | 2 | 3 | 1 |
| 41 | 838 | 2 | 25 | 2 | 2 | 2 | 3 | 1 |
| 42 | 839 | 2 | 50 | 2 | 2 | 2 | 3 | 1 |
| 43 | 840 | 2 | 45 | 1 | 2 | 2 | 4 | 1 |
| 44 | 841 | 2 | 29 | 1 | 2 | 1 | 4 | 1 |
| 45 | 842 | 2 | 55 | 1 | 1 | 2 | 4 | 1 |
| 46 | 843 | 2 | 55 | 1 | 1 | 2 | 2 | 1 |
| 47 | 844 | 2 | 50 | 2 | 2 | 2 | 3 | 1 |
| 48 | 845 | 2 | 22 | 1 | 2 | 4 | 2 | 1 |
| 49 | 846 | 2 | 45 | 1 | 2 | 2 | 2 | 1 |
| 50 | 847 | 2 | 35 | 1 | 2 | 2 | 4 | 2 |
| 51 | 848 | 2 | 45 | 1 | 2 | 1 | 4 | 1 |

|    |     |   |    |   |   |   |   |   |
|----|-----|---|----|---|---|---|---|---|
| 1  |     |   |    |   |   |   |   |   |
| 2  | 849 | 2 | 48 | 1 | 2 | 4 | 1 | 1 |
| 3  | 850 | 2 | 30 | 1 | 2 | 3 | 1 | 1 |
| 4  | 851 | 2 | 40 | 1 | 2 | 2 | 4 | 1 |
| 5  | 852 | 2 | 42 | 1 | 2 | 3 | 1 | 1 |
| 6  |     |   |    |   |   |   |   |   |
| 7  | 853 | 2 | 59 | 1 | 2 | 3 | 2 | 1 |
| 8  | 854 | 2 | 92 | 2 | 2 | 2 | 3 | 1 |
| 9  | 855 | 2 | 50 | 1 | 2 | 3 | 1 | 1 |
| 10 | 856 | 2 | 54 | 1 | 2 | 1 | 4 | 1 |
| 11 | 857 | 2 | 27 | 1 | 1 | 1 | 3 | 1 |
| 12 | 858 | 2 | 59 | 1 | 2 | 2 | 2 | 1 |
| 13 | 859 | 2 | 55 | 1 | 1 | 4 | 1 | 1 |
| 14 | 860 | 2 | 48 | 1 | 2 | 4 | 1 | 1 |
| 15 | 861 | 2 | 22 | 1 | 2 | 3 | 2 | 1 |
| 16 | 862 | 2 | 52 | 1 | 1 | 4 | 4 | 1 |
| 17 | 863 | 2 | 35 | 1 | 1 | 3 | 2 | 1 |
| 18 | 864 | 2 | 20 | 1 | 1 | 4 | 1 | 1 |
| 19 | 865 | 2 | 35 | 1 | 2 | 4 | 1 | 1 |
| 20 | 866 | 2 | 58 | 1 | 2 | 2 | 4 | 1 |
| 21 | 867 | 2 | 49 | 1 | 2 | 4 | 1 | 1 |
| 22 | 868 | 2 | 47 | 1 | 2 | 2 | 4 | 1 |
| 23 | 869 | 2 | 58 | 1 | 2 | 4 | 2 | 1 |
| 24 | 870 | 2 | 55 | 1 | 2 | 3 | 1 | 1 |
| 25 | 871 | 2 | 50 | 1 | 1 | 3 | 4 | 1 |
| 26 | 872 | 2 | 60 | 1 | 2 | 1 | 4 | 1 |
| 27 | 873 | 2 | 51 | 1 | 2 | 4 | 2 | 1 |
| 28 | 874 | 2 | 60 | 1 | 1 | 3 | 4 | 1 |
| 29 | 875 | 2 | 59 | 1 | 2 | 1 | 4 | 1 |
| 30 | 876 | 2 | 55 | 1 | 2 | 1 | 4 | 1 |
| 31 | 877 | 2 | 35 | 1 | 2 | 3 | 1 | 1 |
| 32 | 878 | 2 | 48 | 2 | 2 | 2 | 3 | 1 |
| 33 | 879 | 2 | 56 | 2 | 2 | 1 | 3 | 1 |
| 34 | 880 | 2 | 46 | 2 | 2 | 1 | 4 | 1 |
| 35 | 881 | 2 | 45 | 2 | 1 | 2 | 3 | 1 |
| 36 | 882 | 2 | 45 | 2 | 1 | 2 | 3 | 1 |
| 37 | 883 | 2 | 58 | 2 | 2 | 2 | 3 | 1 |
| 38 | 884 | 2 | 73 | 2 | 2 | 2 | 3 | 1 |
| 39 | 885 | 2 | 48 | 2 | 2 | 1 | 3 | 1 |
| 40 | 886 | 2 | 43 | 2 | 2 | 2 | 3 | 1 |
| 41 | 887 | 2 | 45 | 2 | 2 | 2 | 3 | 1 |
| 42 | 888 | 2 | 39 | 2 | 2 | 2 | 3 | 1 |
| 43 | 889 | 2 | 55 | 2 | 2 | 2 | 3 | 1 |
| 44 | 890 | 2 | 55 | 2 | 2 | 2 | 3 | 1 |
| 45 | 891 | 2 | 35 | 2 | 2 | 1 | 3 | 1 |
| 46 | 892 | 2 | 52 | 2 | 2 | 2 | 3 | 1 |
| 47 | 893 | 2 | 30 | 2 | 2 | 2 | 3 | 1 |
| 48 | 894 | 2 | 44 | 2 | 2 | 2 | 3 | 1 |
| 49 | 895 | 2 | 66 | 2 | 2 | 3 | 3 | 1 |
| 50 | 896 | 2 | 59 | 2 | 1 | 2 | 3 | 1 |
| 51 | 897 | 2 | 44 | 1 | 2 | 1 | 4 | 1 |
| 52 | 898 | 2 | 33 | 2 | 2 | 2 | 3 | 1 |

|    |     |   |    |   |   |   |   |   |
|----|-----|---|----|---|---|---|---|---|
| 1  |     |   |    |   |   |   |   |   |
| 2  | 899 | 2 | 34 | 2 | 2 | 3 | 3 | 1 |
| 3  | 900 | 2 | 58 | 2 | 2 | 1 | 3 | 1 |
| 4  | 901 | 2 | 54 | 2 | 2 | 2 | 3 | 1 |
| 5  | 902 | 2 | 57 | 2 | 2 | 3 | 3 | 1 |
| 6  |     |   |    |   |   |   |   |   |
| 7  | 903 | 2 | 50 | 2 | 1 | 3 | 3 | 1 |
| 8  | 904 | 2 | 46 | 2 | 2 | 3 | 3 | 1 |
| 9  | 905 | 2 | 25 | 2 | 2 | 2 | 3 | 1 |
| 10 | 906 | 2 | 47 | 2 | 2 | 1 | 3 | 1 |
| 11 | 907 | 2 | 55 | 2 | 2 | 2 | 3 | 1 |
| 12 | 908 | 2 | 60 | 2 | 1 | 1 | 3 | 1 |
| 13 | 909 | 2 | 63 | 2 | 2 | 2 | 3 | 1 |
| 14 | 910 | 2 | 52 | 2 | 1 | 2 | 3 | 1 |
| 15 | 911 | 2 | 45 | 2 | 2 | 2 | 3 | 1 |
| 16 | 912 | 2 | 54 | 2 | 1 | 4 | 1 | 1 |
| 17 | 913 | 2 | 36 | 2 | 2 | 2 | 4 | 1 |
| 18 | 914 | 2 | 40 | 2 | 2 | 2 | 2 | 1 |
| 19 | 915 | 2 | 68 | 2 | 1 | 1 | 3 | 1 |
| 20 | 916 | 2 | 58 | 2 | 1 | 1 | 3 | 1 |
| 21 | 917 | 2 | 45 | 2 | 2 | 2 | 3 | 1 |
| 22 | 918 | 2 | 62 | 2 | 1 | 3 | 4 | 1 |
| 23 | 919 | 2 | 40 | 2 | 2 | 2 | 2 | 1 |
| 24 | 920 | 2 | 57 | 2 | 1 | 2 | 3 | 1 |
| 25 | 921 | 2 | 40 | 2 | 2 | 3 | 3 | 1 |
| 26 | 922 | 2 | 45 | 2 | 2 | 1 | 4 | 1 |
| 27 | 923 | 2 | 51 | 2 | 2 | 1 | 3 | 1 |
| 28 | 924 | 2 | 56 | 2 | 2 | 3 | 3 | 1 |
| 29 | 925 | 2 | 35 | 2 | 2 | 1 | 3 | 1 |
| 30 | 926 | 2 | 75 | 2 | 2 | 1 | 3 | 1 |
| 31 | 927 | 2 | 60 | 2 | 1 | 3 | 1 | 1 |
| 32 | 928 | 2 | 56 | 2 | 2 | 2 | 3 | 1 |
| 33 | 929 | 2 | 57 | 2 | 2 | 1 | 3 | 1 |
| 34 | 930 | 2 | 72 | 2 | 1 | 3 | 1 | 1 |
| 35 | 931 | 2 | 56 | 2 | 2 | 2 | 3 | 1 |
| 36 | 932 | 2 | 60 | 2 | 2 | 3 | 3 | 1 |
| 37 | 933 | 2 | 53 | 2 | 2 | 1 | 3 | 1 |
| 38 | 934 | 2 | 40 | 2 | 2 | 1 | 3 | 1 |
| 39 | 935 | 2 | 55 | 2 | 2 | 4 | 4 | 1 |
| 40 | 936 | 2 | 67 | 2 | 1 | 1 | 3 | 1 |
| 41 | 937 | 2 | 50 | 2 | 1 | 1 | 3 | 1 |
| 42 | 938 | 2 | 47 | 2 | 1 | 1 | 3 | 1 |
| 43 | 939 | 2 | 57 | 2 | 2 | 2 | 3 | 1 |
| 44 | 940 | 2 | 27 | 2 | 1 | 4 | 3 | 1 |
| 45 | 941 | 2 | 50 | 2 | 2 | 2 | 3 | 1 |
| 46 | 942 | 2 | 53 | 2 | 2 | 2 | 3 | 1 |
| 47 | 943 | 2 | 45 | 2 | 1 | 3 | 3 | 1 |
| 48 | 944 | 2 | 52 | 2 | 2 | 3 | 3 | 1 |
| 49 | 945 | 2 | 40 | 2 | 1 | 2 | 3 | 1 |
| 50 | 946 | 2 | 47 | 1 | 1 | 3 | 1 | 1 |
| 51 | 947 | 2 | 50 | 2 | 2 | 3 | 1 | 1 |
| 52 | 948 | 2 | 50 | 2 | 1 | 3 | 1 | 2 |



|    |     |   |    |   |   |   |   |   |
|----|-----|---|----|---|---|---|---|---|
| 1  |     |   |    |   |   |   |   |   |
| 2  | 949 | 2 | 58 | 2 | 1 | 2 | 3 | 1 |
| 3  | 950 | 2 | 50 | 2 | 1 | 3 | 1 | 1 |
| 4  | 951 | 2 | 32 | 2 | 1 | 3 | 3 | 1 |
| 5  | 952 | 2 | 40 | 2 | 1 | 2 | 3 | 1 |
| 6  |     |   |    |   |   |   |   |   |
| 7  | 953 | 2 | 70 | 2 | 1 | 3 | 1 | 1 |
| 8  | 954 | 2 | 50 | 2 | 1 | 3 | 3 | 1 |
| 9  | 955 | 2 | 38 | 2 | 1 | 3 | 1 | 1 |
| 10 | 956 | 2 | 49 | 2 | 2 | 2 | 3 | 1 |
| 11 | 957 | 2 | 55 | 2 | 2 | 2 | 3 | 1 |
| 12 | 958 | 2 | 35 | 2 | 2 | 2 | 3 | 1 |
| 13 | 959 | 2 | 66 | 2 | 1 | 2 | 3 | 1 |
| 14 | 960 | 2 | 57 | 2 | 1 | 3 | 1 | 1 |
| 15 | 961 | 2 | 55 | 2 | 2 | 1 | 3 | 1 |
| 16 | 962 | 2 | 65 | 2 | 1 | 3 | 1 | 1 |
| 17 | 963 | 2 | 55 | 2 | 1 | 2 | 3 | 1 |
| 18 | 964 | 2 | 50 | 2 | 2 | 2 | 3 | 1 |
| 19 | 965 | 2 | 73 | 2 | 2 | 2 | 3 | 1 |
| 20 | 966 | 2 | 59 | 2 | 2 | 3 | 3 | 1 |
| 21 | 967 | 2 | 65 | 2 | 1 | 3 | 3 | 1 |
| 22 | 968 | 2 | 60 | 2 | 1 | 2 | 3 | 1 |
| 23 | 969 | 2 | 50 | 1 | 2 | 3 | 4 | 1 |
| 24 | 970 | 2 | 56 | 1 | 2 | 4 | 1 | 1 |
| 25 | 971 | 2 | 50 | 1 | 2 | 3 | 2 | 1 |
| 26 | 972 | 2 | 75 | 1 | 1 | 3 | 2 | 1 |
| 27 | 973 | 2 | 80 | 1 | 2 | 1 | 4 | 1 |
| 28 | 974 | 2 | 60 | 1 | 2 | 2 | 4 | 2 |
| 29 | 975 | 2 | 78 | 1 | 2 | 3 | 2 | 1 |
| 30 | 976 | 2 | 52 | 1 | 1 | 3 | 1 | 1 |
| 31 | 977 | 2 | 60 | 1 | 1 | 4 | 1 | 1 |
| 32 | 978 | 2 | 51 | 1 | 2 | 1 | 4 | 1 |
| 33 | 979 | 2 | 45 | 1 | 2 | 2 | 4 | 1 |
| 34 | 980 | 2 | 60 | 1 | 1 | 4 | 4 | 1 |
| 35 | 981 | 2 | 45 | 1 | 2 | 3 | 4 | 1 |
| 36 | 982 | 2 | 67 | 1 | 2 | 3 | 4 | 1 |
| 37 | 983 | 2 | 40 | 1 | 2 | 3 | 1 | 1 |
| 38 | 984 | 2 | 63 | 1 | 2 | 3 | 1 | 1 |
| 39 | 985 | 2 | 50 | 2 | 1 | 2 | 3 | 1 |
| 40 | 986 | 2 | 35 | 2 | 2 | 1 | 3 | 1 |
| 41 | 987 | 2 | 47 | 2 | 2 | 2 | 3 | 1 |
| 42 | 988 | 2 | 50 | 2 | 2 | 3 | 3 | 1 |
| 43 | 989 | 2 | 62 | 2 | 1 | 3 | 1 | 1 |
| 44 | 990 | 2 | 62 | 2 | 1 | 2 | 3 | 1 |
| 45 | 991 | 2 | 65 | 2 | 2 | 1 | 3 | 1 |
| 46 | 992 | 2 | 62 | 2 | 1 | 2 | 3 | 1 |
| 47 | 993 | 2 | 66 | 2 | 1 | 3 | 3 | 1 |
| 48 | 994 | 2 | 73 | 2 | 1 | 3 | 3 | 1 |
| 49 | 995 | 2 | 48 | 2 | 1 | 2 | 3 | 1 |
| 50 | 996 | 2 | 50 | 2 | 2 | 3 | 3 | 1 |
| 51 | 997 | 2 | 57 | 2 | 1 | 3 | 3 | 1 |
| 52 | 998 | 2 | 47 | 2 | 1 | 3 | 3 | 1 |

|    |      |   |    |   |   |   |   |   |
|----|------|---|----|---|---|---|---|---|
| 1  |      |   |    |   |   |   |   |   |
| 2  | 999  | 2 | 55 | 2 | 2 | 2 | 3 | 1 |
| 3  | 1000 | 2 | 40 | 2 | 2 | 2 | 3 | 1 |
| 4  | 1001 | 2 | 45 | 2 | 2 | 2 | 3 | 1 |
| 5  | 1002 | 2 | 62 | 2 | 1 | 4 | 1 | 1 |
| 6  | 1003 | 2 | 45 | 2 | 1 | 3 | 3 | 1 |
| 7  | 1004 | 2 | 46 | 2 | 1 | 2 | 1 | 1 |
| 8  | 1005 | 2 | 55 | 2 | 2 | 1 | 3 | 1 |
| 9  | 1006 | 2 | 59 | 2 | 1 | 3 | 3 | 1 |
| 10 | 1007 | 2 | 74 | 2 | 1 | 3 | 3 | 1 |
| 11 | 1008 | 2 | 60 | 2 | 1 | 3 | 3 | 1 |
| 12 | 1009 | 2 | 70 | 2 | 1 | 2 | 3 | 1 |
| 13 | 1010 | 2 | 60 | 2 | 2 | 2 | 3 | 1 |
| 14 | 1011 | 2 | 63 | 2 | 1 | 3 | 3 | 1 |
| 15 | 1012 | 2 | 62 | 2 | 1 | 2 | 3 | 1 |
| 16 | 1013 | 2 | 70 | 2 | 1 | 3 | 3 | 1 |
| 17 | 1014 | 2 | 43 | 1 | 1 | 3 | 1 | 1 |
| 18 | 1015 | 2 | 50 | 1 | 2 | 1 | 2 | 1 |
| 19 | 1016 | 2 | 45 | 2 | 2 | 3 | 1 | 1 |
| 20 | 1017 | 2 | 63 | 2 | 2 | 3 | 2 | 1 |
| 21 | 1018 | 2 | 63 | 1 | 1 | 4 | 1 | 1 |
| 22 | 1019 | 2 | 35 | 2 | 2 | 1 | 3 | 1 |
| 23 | 1020 | 2 | 60 | 2 | 2 | 2 | 3 | 1 |
| 24 | 1021 | 2 | 73 | 2 | 2 | 1 | 3 | 1 |
| 25 | 1022 | 2 | 58 | 2 | 2 | 3 | 3 | 1 |
| 26 | 1023 | 2 | 40 | 2 | 2 | 3 | 1 | 1 |
| 27 | 1024 | 2 | 65 | 2 | 2 | 2 | 3 | 1 |
| 28 | 1025 | 2 | 50 | 2 | 2 | 1 | 3 | 1 |
| 29 | 1026 | 2 | 45 | 2 | 2 | 2 | 1 | 1 |
| 30 | 1027 | 2 | 35 | 2 | 2 | 3 | 1 | 1 |
| 31 | 1028 | 2 | 46 | 2 | 2 | 3 | 3 | 1 |
| 32 | 1029 | 2 | 63 | 2 | 2 | 1 | 3 | 1 |
| 33 | 1030 | 2 | 45 | 2 | 2 | 2 | 1 | 1 |
| 34 | 1031 | 2 | 63 | 2 | 2 | 2 | 3 | 1 |
| 35 | 1032 | 2 | 45 | 2 | 2 | 1 | 3 | 1 |
| 36 | 1033 | 2 | 40 | 2 | 2 | 2 | 3 | 1 |
| 37 | 1034 | 2 | 42 | 2 | 2 | 2 | 3 | 1 |
| 38 | 1035 | 2 | 61 | 2 | 2 | 2 | 3 | 1 |
| 39 | 1036 | 2 | 66 | 2 | 2 | 1 | 3 | 1 |
| 40 | 1037 | 2 | 62 | 2 | 2 | 2 | 3 | 1 |
| 41 | 1038 | 2 | 60 | 2 | 2 | 2 | 3 | 1 |
| 42 | 1039 | 2 | 50 | 2 | 2 | 2 | 3 | 1 |
| 43 | 1040 | 2 | 45 | 2 | 2 | 3 | 1 | 1 |
| 44 | 1041 | 2 | 45 | 2 | 2 | 2 | 3 | 1 |
| 45 | 1042 | 2 | 60 | 2 | 2 | 1 | 3 | 1 |
| 46 | 1043 | 2 | 45 | 2 | 1 | 3 | 3 | 1 |
| 47 | 1044 | 2 | 60 | 2 | 1 | 3 | 1 | 1 |
| 48 | 1045 | 2 | 61 | 2 | 2 | 3 | 3 | 1 |
| 49 | 1046 | 2 | 43 | 2 | 1 | 3 | 1 | 1 |
| 50 | 1047 | 2 | 69 | 1 | 1 | 4 | 2 | 1 |
| 51 | 1048 | 2 | 40 | 2 | 1 | 1 | 3 | 1 |

|    |      |   |    |   |   |   |   |   |
|----|------|---|----|---|---|---|---|---|
| 1  |      |   |    |   |   |   |   |   |
| 2  | 1049 | 2 | 42 | 2 | 1 | 3 | 3 | 1 |
| 3  | 1050 | 2 | 62 | 2 | 1 | 3 | 3 | 1 |
| 4  | 1051 | 2 | 70 | 2 | 1 | 3 | 3 | 1 |
| 5  | 1052 | 2 | 49 | 2 | 1 | 1 | 3 | 1 |
| 6  |      |   |    |   |   |   |   |   |
| 7  | 1053 | 2 | 58 | 2 | 2 | 1 | 3 | 1 |
| 8  | 1054 | 2 | 53 | 2 | 2 | 2 | 3 | 1 |
| 9  | 1055 | 2 | 44 | 2 | 1 | 3 | 3 | 1 |
| 10 | 1056 | 2 | 40 | 2 | 2 | 2 | 3 | 1 |
| 11 | 1057 | 2 | 60 | 2 | 2 | 4 | 1 | 1 |
| 12 | 1058 | 2 | 48 | 2 | 1 | 2 | 3 | 1 |
| 13 | 1059 | 2 | 56 | 2 | 2 | 1 | 3 | 1 |
| 14 | 1060 | 2 | 65 | 2 | 1 | 3 | 3 | 1 |
| 15 | 1061 | 2 | 57 | 2 | 1 | 3 | 3 | 1 |
| 16 | 1062 | 2 | 70 | 2 | 1 | 1 | 3 | 1 |
| 17 | 1063 | 2 | 52 | 2 | 1 | 2 | 3 | 1 |
| 18 | 1064 | 2 | 49 | 2 | 2 | 2 | 3 | 1 |
| 19 | 1065 | 2 | 60 | 2 | 1 | 1 | 3 | 1 |
| 20 | 1066 | 2 | 55 | 2 | 1 | 3 | 1 | 1 |
| 21 | 1067 | 2 | 55 | 2 | 1 | 2 | 3 | 1 |
| 22 | 1068 | 2 | 93 | 2 | 1 | 3 | 3 | 1 |
| 23 | 1069 | 2 | 68 | 2 | 1 | 1 | 3 | 1 |
| 24 | 1070 | 2 | 70 | 2 | 2 | 1 | 3 | 1 |
| 25 | 1071 | 2 | 60 | 1 | 1 | 3 | 1 | 1 |
| 26 | 1072 | 2 | 59 | 1 | 1 | 4 | 1 | 1 |
| 27 | 1073 | 2 | 75 | 1 | 1 | 2 | 1 | 1 |
| 28 | 1074 | 2 | 80 | 1 | 2 | 3 | 2 | 1 |
| 29 | 1075 | 2 | 48 | 1 | 1 | 3 | 1 | 1 |
| 30 | 1076 | 2 | 30 | 1 | 1 | 1 | 1 | 1 |
| 31 | 1077 | 2 | 44 | 1 | 1 | 4 | 1 | 1 |
| 32 | 1078 | 2 | 65 | 1 | 2 | 3 | 1 | 1 |
| 33 | 1079 | 2 | 52 | 1 | 1 | 3 | 1 | 1 |
| 34 | 1080 | 2 | 47 | 1 | 1 | 2 | 2 | 1 |
| 35 | 1081 | 2 | 42 | 1 | 2 | 2 | 4 | 1 |
| 36 | 1082 | 2 | 75 | 1 | 1 | 3 | 4 | 1 |
| 37 | 1083 | 2 | 50 | 1 | 1 | 2 | 2 | 1 |
| 38 | 1084 | 2 | 36 | 1 | 1 | 2 | 1 | 1 |
| 39 | 1085 | 2 | 24 | 1 | 2 | 3 | 2 | 1 |
| 40 | 1086 | 2 | 47 | 1 | 2 | 4 | 1 | 1 |
| 41 | 1087 | 2 | 41 | 1 | 1 | 3 | 1 | 1 |
| 42 | 1088 | 2 | 49 | 2 | 1 | 2 | 3 | 1 |
| 43 | 1089 | 2 | 35 | 2 | 1 | 1 | 3 | 1 |
| 44 | 1090 | 2 | 37 | 2 | 1 | 1 | 3 | 1 |
| 45 | 1091 | 2 | 50 | 2 | 1 | 2 | 3 | 1 |
| 46 | 1092 | 2 | 50 | 1 | 1 | 3 | 1 | 2 |
| 47 | 1093 | 2 | 23 | 1 | 1 | 3 | 4 | 1 |
| 48 | 1094 | 2 | 52 | 1 | 1 | 3 | 1 | 1 |
| 49 | 1095 | 2 | 30 | 1 | 2 | 1 | 4 | 1 |
| 50 | 1096 | 2 | 45 | 2 | 1 | 2 | 3 | 1 |
| 51 | 1097 | 2 | 60 | 1 | 2 | 1 | 4 | 1 |
| 52 | 1098 | 2 | 42 | 2 | 2 | 1 | 3 | 1 |

|    |      |   |    |   |   |   |   |   |
|----|------|---|----|---|---|---|---|---|
| 1  |      |   |    |   |   |   |   |   |
| 2  | 1099 | 2 | 35 | 2 | 1 | 1 | 3 | 1 |
| 3  | 1100 | 2 | 53 | 1 | 1 | 1 | 4 | 1 |
| 4  | 1101 | 2 | 70 | 1 | 1 | 3 | 2 | 1 |
| 5  | 1102 | 2 | 46 | 2 | 1 | 2 | 3 | 1 |
| 6  |      |   |    |   |   |   |   |   |
| 7  | 1103 | 2 | 43 | 2 | 2 | 1 | 3 | 1 |
| 8  | 1104 | 2 | 49 | 2 | 1 | 2 | 3 | 1 |
| 9  | 1105 | 2 | 70 | 1 | 1 | 4 | 1 | 1 |
| 10 | 1106 | 2 | 79 | 2 | 1 | 1 | 3 | 1 |
| 11 | 1107 | 2 | 25 | 2 | 1 | 3 | 3 | 1 |
| 12 |      |   |    |   |   |   |   |   |
| 13 | 1108 | 2 | 40 | 1 | 1 | 1 | 4 | 1 |
| 14 | 1109 | 2 | 50 | 2 | 1 | 1 | 3 | 1 |
| 15 | 1110 | 2 | 30 | 2 | 1 | 1 | 3 | 1 |
| 16 | 1111 | 2 | 46 | 1 | 1 | 3 | 2 | 1 |
| 17 | 1112 | 2 | 70 | 1 | 2 | 2 | 4 | 1 |
| 18 |      |   |    |   |   |   |   |   |
| 19 | 1113 | 2 | 35 | 1 | 1 | 4 | 4 | 1 |
| 20 | 1114 | 2 | 45 | 1 | 1 | 4 | 1 | 1 |
| 21 | 1115 | 2 | 47 | 1 | 1 | 4 | 4 | 1 |
| 22 | 1116 | 2 | 65 | 2 | 1 | 1 | 3 | 1 |
| 23 |      |   |    |   |   |   |   |   |
| 24 | 1117 | 2 | 20 | 2 | 2 | 1 | 3 | 1 |
| 25 | 1118 | 2 | 45 | 2 | 2 | 1 | 3 | 1 |
| 26 | 1119 | 2 | 55 | 1 | 1 | 1 | 1 | 1 |
| 27 | 1120 | 2 | 65 | 2 | 1 | 2 | 3 | 1 |
| 28 | 1121 | 2 | 46 | 1 | 1 | 2 | 1 | 1 |
| 29 |      |   |    |   |   |   |   |   |
| 30 | 1122 | 2 | 45 | 1 | 1 | 4 | 4 | 1 |
| 31 | 1123 | 2 | 41 | 1 | 2 | 2 | 2 | 1 |
| 32 | 1124 | 2 | 47 | 2 | 2 | 1 | 3 | 1 |
| 33 | 1125 | 2 | 55 | 2 | 1 | 2 | 3 | 1 |
| 34 | 1126 | 2 | 70 | 2 | 2 | 1 | 3 | 1 |
| 35 | 1127 | 2 | 43 | 2 | 1 | 4 | 4 | 1 |
| 36 | 1128 | 2 | 55 | 1 | 1 | 3 | 2 | 1 |
| 37 | 1129 | 2 | 55 | 2 | 1 | 2 | 3 | 1 |
| 38 |      |   |    |   |   |   |   |   |
| 39 | 1130 | 2 | 72 | 2 | 1 | 3 | 3 | 1 |
| 40 | 1131 | 2 | 40 | 2 | 2 | 1 | 3 | 1 |
| 41 | 1132 | 2 | 39 | 1 | 1 | 3 | 1 | 1 |
| 42 | 1133 | 2 | 70 | 2 | 1 | 2 | 3 | 1 |
| 43 | 1134 | 2 | 50 | 2 | 2 | 1 | 3 | 1 |
| 44 | 1135 | 2 | 35 | 1 | 2 | 1 | 4 | 1 |
| 45 | 1136 | 2 | 42 | 2 | 1 | 2 | 3 | 1 |
| 46 | 1137 | 2 | 50 | 2 | 1 | 4 | 1 | 1 |
| 47 | 1138 | 2 | 42 | 2 | 1 | 2 | 3 | 1 |
| 48 |      |   |    |   |   |   |   |   |
| 49 | 1139 | 2 | 36 | 2 | 2 | 1 | 3 | 1 |
| 50 | 1140 | 2 | 55 | 2 | 1 | 1 | 3 | 1 |
| 51 | 1141 | 2 | 50 | 1 | 2 | 4 | 1 | 1 |
| 52 | 1142 | 2 | 60 | 2 | 1 | 2 | 3 | 1 |
| 53 | 1143 | 2 | 45 | 2 | 2 | 2 | 3 | 1 |
| 54 | 1144 | 2 | 60 | 1 | 2 | 1 | 4 | 1 |
| 55 | 1145 | 2 | 73 | 2 | 2 | 3 | 3 | 1 |
| 56 | 1146 | 2 | 90 | 2 | 2 | 2 | 3 | 1 |
| 57 | 1147 | 2 | 40 | 2 | 1 | 2 | 3 | 1 |
| 58 |      |   |    |   |   |   |   |   |
| 59 | 1148 | 2 | 46 | 2 | 1 | 2 | 3 | 1 |
| 60 |      |   |    |   |   |   |   |   |

|    |      |   |    |   |   |   |   |   |
|----|------|---|----|---|---|---|---|---|
| 1  |      |   |    |   |   |   |   |   |
| 2  | 1149 | 2 | 56 | 2 | 1 | 1 | 3 | 1 |
| 3  | 1150 | 2 | 45 | 2 | 1 | 1 | 3 | 1 |
| 4  | 1151 | 2 | 55 | 2 | 1 | 2 | 2 | 1 |
| 5  | 1152 | 2 | 42 | 2 | 2 | 2 | 2 | 1 |
| 6  |      |   |    |   |   |   |   |   |
| 7  | 1153 | 2 | 50 | 2 | 2 | 2 | 3 | 1 |
| 8  | 1154 | 2 | 45 | 2 | 2 | 1 | 3 | 1 |
| 9  | 1155 | 2 | 42 | 2 | 2 | 2 | 3 | 1 |
| 10 | 1156 | 2 | 35 | 2 | 2 | 2 | 3 | 1 |
| 11 | 1157 | 2 | 45 | 1 | 2 | 3 | 4 | 1 |
| 12 |      |   |    |   |   |   |   |   |
| 13 | 1158 | 2 | 42 | 1 | 2 | 4 | 4 | 1 |
| 14 | 1159 | 2 | 65 | 2 | 2 | 2 | 3 | 1 |
| 15 | 1160 | 2 | 40 | 2 | 2 | 2 | 3 | 1 |
| 16 | 1161 | 2 | 55 | 2 | 1 | 1 | 3 | 1 |
| 17 | 1162 | 2 | 60 | 1 | 2 | 2 | 2 | 1 |
| 18 |      |   |    |   |   |   |   |   |
| 19 | 1163 | 2 | 50 | 1 | 2 | 1 | 4 | 1 |
| 20 | 1164 | 2 | 47 | 2 | 2 | 1 | 3 | 1 |
| 21 | 1165 | 2 | 70 | 1 | 2 | 3 | 4 | 1 |
| 22 | 1166 | 2 | 52 | 2 | 1 | 2 | 3 | 1 |
| 23 |      |   |    |   |   |   |   |   |
| 24 | 1167 | 2 | 40 | 1 | 2 | 3 | 4 | 1 |
| 25 | 1168 | 2 | 40 | 2 | 2 | 1 | 3 | 1 |
| 26 | 1169 | 2 | 60 | 2 | 2 | 1 | 3 | 1 |
| 27 | 1170 | 2 | 46 | 1 | 2 | 4 | 1 | 1 |
| 28 | 1171 | 2 | 40 | 1 | 2 | 3 | 4 | 1 |
| 29 |      |   |    |   |   |   |   |   |
| 30 | 1172 | 2 | 50 | 2 | 1 | 2 | 3 | 1 |
| 31 | 1173 | 2 | 50 | 2 | 2 | 1 | 3 | 1 |
| 32 | 1174 | 2 | 40 | 2 | 2 | 1 | 3 | 1 |
| 33 | 1175 | 2 | 56 | 2 | 1 | 3 | 3 | 1 |
| 34 | 1176 | 2 | 60 | 2 | 2 | 2 | 3 | 1 |
| 35 | 1177 | 2 | 60 | 1 | 2 | 3 | 2 | 1 |
| 36 | 1178 | 2 | 30 | 2 | 2 | 2 | 3 | 1 |
| 37 | 1179 | 2 | 40 | 1 | 2 | 3 | 4 | 1 |
| 38 |      |   |    |   |   |   |   |   |
| 39 | 1180 | 2 | 30 | 2 | 2 | 1 | 3 | 1 |
| 40 | 1181 | 2 | 55 | 2 | 2 | 2 | 3 | 1 |
| 41 | 1182 | 2 | 60 | 2 | 2 | 1 | 3 | 1 |
| 42 | 1183 | 2 | 65 | 2 | 2 | 3 | 3 | 1 |
| 43 | 1184 | 2 | 41 | 2 | 2 | 1 | 3 | 1 |
| 44 | 1185 | 2 | 60 | 2 | 2 | 2 | 3 | 1 |
| 45 | 1186 | 2 | 30 | 2 | 2 | 1 | 3 | 1 |
| 46 | 1187 | 2 | 35 | 2 | 2 | 1 | 3 | 1 |
| 47 | 1188 | 2 | 56 | 2 | 2 | 1 | 3 | 1 |
| 48 | 1189 | 2 | 56 | 2 | 2 | 1 | 3 | 1 |
| 49 | 1190 | 2 | 72 | 1 | 2 | 2 | 1 | 1 |
| 50 | 1191 | 2 | 65 | 1 | 2 | 3 | 2 | 1 |
| 51 | 1192 | 2 | 54 | 1 | 2 | 3 | 1 | 1 |
| 52 | 1193 | 2 | 55 | 1 | 2 | 2 | 1 | 1 |
| 53 | 1194 | 2 | 45 | 2 | 2 | 2 | 4 | 1 |
| 54 | 1195 | 2 | 45 | 1 | 1 | 4 | 1 | 1 |
| 55 | 1196 | 2 | 63 | 2 | 2 | 2 | 3 | 1 |
| 56 | 1197 | 2 | 70 | 2 | 2 | 1 | 3 | 1 |
| 57 | 1198 | 2 | 68 | 2 | 2 | 1 | 3 | 1 |

|    |      |   |    |   |   |   |   |   |
|----|------|---|----|---|---|---|---|---|
| 1  |      |   |    |   |   |   |   |   |
| 2  | 1199 | 2 | 37 | 1 | 1 | 3 | 4 | 1 |
| 3  | 1200 | 2 | 59 | 2 | 1 | 2 | 4 | 1 |
| 4  |      |   |    |   |   |   |   |   |
| 5  |      |   |    |   |   |   |   |   |
| 6  |      |   |    |   |   |   |   |   |
| 7  |      |   |    |   |   |   |   |   |
| 8  |      |   |    |   |   |   |   |   |
| 9  |      |   |    |   |   |   |   |   |
| 10 |      |   |    |   |   |   |   |   |
| 11 |      |   |    |   |   |   |   |   |
| 12 |      |   |    |   |   |   |   |   |
| 13 |      |   |    |   |   |   |   |   |
| 14 |      |   |    |   |   |   |   |   |
| 15 |      |   |    |   |   |   |   |   |
| 16 |      |   |    |   |   |   |   |   |
| 17 |      |   |    |   |   |   |   |   |
| 18 |      |   |    |   |   |   |   |   |
| 19 |      |   |    |   |   |   |   |   |
| 20 |      |   |    |   |   |   |   |   |
| 21 |      |   |    |   |   |   |   |   |
| 22 |      |   |    |   |   |   |   |   |
| 23 |      |   |    |   |   |   |   |   |
| 24 |      |   |    |   |   |   |   |   |
| 25 |      |   |    |   |   |   |   |   |
| 26 |      |   |    |   |   |   |   |   |
| 27 |      |   |    |   |   |   |   |   |
| 28 |      |   |    |   |   |   |   |   |
| 29 |      |   |    |   |   |   |   |   |
| 30 |      |   |    |   |   |   |   |   |
| 31 |      |   |    |   |   |   |   |   |
| 32 |      |   |    |   |   |   |   |   |
| 33 |      |   |    |   |   |   |   |   |
| 34 |      |   |    |   |   |   |   |   |
| 35 |      |   |    |   |   |   |   |   |
| 36 |      |   |    |   |   |   |   |   |
| 37 |      |   |    |   |   |   |   |   |
| 38 |      |   |    |   |   |   |   |   |
| 39 |      |   |    |   |   |   |   |   |
| 40 |      |   |    |   |   |   |   |   |
| 41 |      |   |    |   |   |   |   |   |
| 42 |      |   |    |   |   |   |   |   |
| 43 |      |   |    |   |   |   |   |   |
| 44 |      |   |    |   |   |   |   |   |
| 45 |      |   |    |   |   |   |   |   |
| 46 |      |   |    |   |   |   |   |   |
| 47 |      |   |    |   |   |   |   |   |
| 48 |      |   |    |   |   |   |   |   |
| 49 |      |   |    |   |   |   |   |   |
| 50 |      |   |    |   |   |   |   |   |
| 51 |      |   |    |   |   |   |   |   |
| 52 |      |   |    |   |   |   |   |   |
| 53 |      |   |    |   |   |   |   |   |
| 54 |      |   |    |   |   |   |   |   |
| 55 |      |   |    |   |   |   |   |   |
| 56 |      |   |    |   |   |   |   |   |
| 57 |      |   |    |   |   |   |   |   |
| 58 |      |   |    |   |   |   |   |   |
| 59 |      |   |    |   |   |   |   |   |
| 60 |      |   |    |   |   |   |   |   |

For peer review only

|    | Q8_fam_inc | BMI       | Q18_dur_DM | Insulin_user |
|----|------------|-----------|------------|--------------|
| 1  |            |           |            |              |
| 2  |            |           |            |              |
| 3  |            |           |            |              |
| 4  | 20000      | 22.222222 | 8          | 2            |
| 5  | 5000       | 26.254988 | 2          | 2            |
| 6  | 15000      | 25.631167 | 8          | 2            |
| 7  | 35000      | 23.555556 | 12         | 2            |
| 8  | 10000      | 26.575379 | 15         | 1            |
| 9  | 20000      | 23.555556 | 11         | 1            |
| 10 | 40000      | 24.863952 | 1          | 2            |
| 11 | 50000      | 31.739734 | 6          | 1            |
| 12 | 20000      | 24        | 20         | 2            |
| 13 | 50000      | 29.174885 | 19         | 1            |
| 14 | 20000      | 22.213678 | 11         | 2            |
| 15 | 10000      | 22.370343 | 3          | 2            |
| 16 | 30000      | 23.828125 | 7          | 2            |
| 17 | 60000      | 23.111111 | 14         | 1            |
| 18 | 6000       | 36.212279 | 8          | 2            |
| 19 | 100000     | 23.555556 | 14         | 1            |
| 20 | 15000      | 26.365603 | 13         | 2            |
| 21 | 6000       | 21.484375 | 8          | 2            |
| 22 | 65000      | 25.910684 | 10         | 2            |
| 23 | 100000     | 24.767566 | 2          | 2            |
| 24 | 10000      | 25        | 8          | 2            |
| 25 | 6000       | 23.804801 | 3          | 1            |
| 26 | 20000      | 25.711662 | 15         | 2            |
| 27 | 35000      | 23.739956 | 7          | 2            |
| 28 | 3000       | 20.808561 | 8          | 2            |
| 29 | 8000       | 22.038567 | 2          | 2            |
| 30 | 15000      | 24.386526 | 6          | 1            |
| 31 | 30000      | 26.128611 | 7          | 2            |
| 32 | 15000      | 22.30815  | 15         | 1            |
| 33 | 15000      | 23.91883  | 3          | 2            |
| 34 | 20000      | 24.973985 | 15         | 1            |
| 35 | 30000      | 25.81663  | 5          | 2            |
| 36 | 15000      | 26.159334 | 19         | 1            |
| 37 | 30000      | 25.039919 | 13         | 2            |
| 38 | 20000      | 20.177149 | 15         | 1            |
| 39 | 4000       | 24.382373 | 5          | 2            |
| 40 | 500000     | 19.003908 | 3          | 2            |
| 41 | 22000      | 28.999307 | 12         | 1            |
| 42 | 30000      | 24.141519 | 7          | 1            |
| 43 | 40000      | 28.577961 | 12         | 1            |
| 44 | 750000     | 23.111111 | 11         | 1            |
| 45 | 6000       | 22.10029  | 12         | 1            |
| 46 | 2000       | 25.711662 | 10         | 2            |
| 47 | 7000       | 25.910684 | 5          | 2            |
| 48 | 30000      | 25.631167 | 2          | 2            |
| 49 | 90000      | 19.959355 | 17         | 1            |
| 50 | 35000      | 24.538965 | 21         | 1            |
| 51 | 35000      | 24.973985 | 16         | 1            |

|    |        |           |    |   |
|----|--------|-----------|----|---|
| 1  |        |           |    |   |
| 2  | 50000  | 28.959    | 12 | 2 |
| 3  | 20000  | 25.452358 | 6  | 2 |
| 4  | 40000  | 28.515625 | 11 | 1 |
| 5  | 20000  | 32.889189 | 7  | 2 |
| 6  | 40000  | 26.573129 | 6  | 2 |
| 7  | 20000  | 23.555556 | 14 | 1 |
| 8  | 70000  | 26.365603 | 7  | 2 |
| 9  | 90000  | 23.4375   | 15 | 2 |
| 10 | 5000   | 22.031726 | 26 | 1 |
| 11 | 40000  | 27.111111 | 23 | 2 |
| 12 | 15000  | 21.875    | 24 | 2 |
| 13 | 12000  | 29.384757 | 5  | 2 |
| 14 | 50000  | 30.078125 | 3  | 2 |
| 15 | 65000  | 22.038567 | 9  | 1 |
| 16 | 100000 | 27.915519 | 10 | 2 |
| 17 | 60000  | 24.21875  | 20 | 2 |
| 18 | 10000  | 17.990153 | 25 | 1 |
| 19 | 20000  | 27.34375  | 5  | 2 |
| 20 | 100000 | 32.466181 | 20 | 2 |
| 21 | 35000  | 24.005487 | 3  | 2 |
| 22 | 7000   | 24.524346 | 8  | 2 |
| 23 | 20000  | 26.297578 | 25 | 2 |
| 24 | 5000   | 24.394821 | 1  | 2 |
| 25 | 30000  | 24.796667 | 1  | 1 |
| 26 | 30000  | 23.111111 | 10 | 1 |
| 27 | 35000  | 37.530494 | 1  | 2 |
| 28 | 50000  | 22.222222 | 3  | 2 |
| 29 | 30000  | 23.111111 | 1  | 2 |
| 30 | 30000  | 24.646648 | 12 | 2 |
| 31 | 20000  | 30.297784 | 10 | 2 |
| 32 | 25000  | 27.848795 | 10 | 1 |
| 33 | 30000  | 22.826881 | 10 | 1 |
| 34 | 15000  | 25.510204 | 12 | 2 |
| 35 | 10000  | 25.78125  | 1  | 2 |
| 36 | 100000 | 28.068944 | 5  | 2 |
| 37 | 20000  | 22.0741   | 15 | 2 |
| 38 | 30000  | 23.422368 | 3  | 2 |
| 39 | 5000   | 28.934069 | 6  | 2 |
| 40 | 6000   | 21.641274 | 2  | 2 |
| 41 | 100000 | 26.171875 | 8  | 2 |
| 42 | 60000  | 29.357522 | 5  | 2 |
| 43 | 20000  | 27.209608 | 2  | 2 |
| 44 | 5000   | 25.566107 | 5  | 2 |
| 45 | 12000  | 23.804801 | 5  | 2 |
| 46 | 50000  | 24.005487 | 10 | 1 |
| 47 | 40000  | 23.739956 | 16 | 1 |
| 48 | 70000  | 29.086132 | 5  | 2 |
| 49 | 25000  | 25.910684 | 8  | 2 |
| 50 | 50000  | 17.777778 | 1  | 2 |
| 51 | 40000  | 24.304618 | 1  | 2 |



|    |        |           |    |   |
|----|--------|-----------|----|---|
| 1  |        |           |    |   |
| 2  | 25000  | 25.510204 | 1  | 2 |
| 3  | 15000  | 24.973985 | 6  | 2 |
| 4  | 70000  | 28.981143 | 2  | 1 |
| 5  | 15000  | 28.30385  | 19 | 1 |
| 6  | 10000  | 27.209608 | 2  | 2 |
| 7  | 8000   | 27.766209 | 5  | 2 |
| 8  | 30000  | 20.342798 | 4  | 2 |
| 9  | 10000  | 27.993022 | 7  | 2 |
| 10 | 40000  | 23.233456 | 2  | 2 |
| 11 | 15000  | 26.271345 | 2  | 2 |
| 12 | 10000  | 19.436346 | 5  | 2 |
| 13 | 20000  | 28.068944 | 20 | 1 |
| 14 | 40000  | 25.674519 | 8  | 2 |
| 15 | 10000  | 32.894737 | 14 | 1 |
| 16 | 7000   | 29.674945 | 2  | 2 |
| 17 | 40000  | 32.51821  | 7  | 2 |
| 18 | 60000  | 26.83518  | 3  | 2 |
| 19 | 40000  | 27.700831 | 15 | 2 |
| 20 | 30000  | 24.835763 | 3  | 2 |
| 21 | 30000  | 24.767566 | 19 | 1 |
| 22 | 30000  | 24.653031 | 20 | 1 |
| 23 | 30000  | 25.203981 | 12 | 2 |
| 24 | 10000  | 29.341288 | 2  | 2 |
| 25 | 25000  | 27.555556 | 10 | 1 |
| 26 | 20000  | 24        | 5  | 1 |
| 27 | 22000  | 23.422091 | 20 | 2 |
| 28 | 20000  | 26.402355 | 16 | 1 |
| 29 | 20000  | 29.432133 | 2  | 2 |
| 30 | 30000  | 25.558846 | 8  | 2 |
| 31 | 100000 | 22.939751 | 14 | 2 |
| 32 | 80000  | 29.086132 | 3  | 2 |
| 33 | 5000   | 24.21875  | 4  | 2 |
| 34 | 12000  | 21.367521 | 15 | 1 |
| 35 | 10000  | 29.515939 | 6  | 2 |
| 36 | 5000   | 18.75     | 1  | 2 |
| 37 | 25000  | 22.0741   | 2  | 2 |
| 38 | 20000  | 33.284024 | 10 | 2 |
| 39 | 30000  | 26.83518  | 17 | 2 |
| 40 | 50000  | 21.110903 | 5  | 2 |
| 41 | 30000  | 26.222685 | 20 | 1 |
| 42 | 100000 | 30.493526 | 9  | 2 |
| 43 | 50000  | 27.555556 | 17 | 2 |
| 44 | 25000  | 27.18163  | 6  | 2 |
| 45 | 28000  | 27.006173 | 5  | 2 |
| 46 | 20000  | 26.037494 | 10 | 2 |
| 47 | 8000   | 24        | 2  | 2 |
| 48 | 30000  | 28.76187  | 16 | 2 |
| 49 | 15000  | 23.833005 | 1  | 2 |
| 50 | 25000  | 23.833005 | 1  | 2 |
| 51 | 8000   | 23.805402 | 15 | 2 |

|    |        |           |    |   |
|----|--------|-----------|----|---|
| 1  |        |           |    |   |
| 2  | 30000  | 22.89282  | 5  | 1 |
| 3  | 25000  | 32        | 4  | 2 |
| 4  | 15000  | 23.875115 | 1  | 2 |
| 5  | 7000   | 29.094282 | 5  | 2 |
| 6  | 100000 | 26.298488 | 18 | 2 |
| 7  | 13000  | 29.417438 | 17 | 2 |
| 8  | 30000  | 22.506925 | 6  | 2 |
| 9  | 25000  | 24.314124 | 5  | 2 |
| 10 | 30000  | 28.133657 | 17 | 2 |
| 11 | 20000  | 33.777778 | 1  | 2 |
| 12 | 20000  | 30.131483 | 5  | 2 |
| 13 | 15000  | 31.079681 | 1  | 2 |
| 14 | 7000   | 24.747454 | 8  | 2 |
| 15 | 20000  | 23.805402 | 5  | 2 |
| 16 | 60000  | 20.444444 | 1  | 2 |
| 17 | 30000  | 29.864958 | 1  | 2 |
| 18 | 60000  | 23.612751 | 9  | 2 |
| 19 | 40000  | 28.76187  | 7  | 1 |
| 20 | 20000  | 33.732501 | 4  | 2 |
| 21 | 50000  | 31.900919 | 9  | 1 |
| 22 | 20000  | 23.951227 | 12 | 2 |
| 23 | 5000   | 21.208449 | 9  | 2 |
| 24 | 30000  | 28.888889 | 1  | 2 |
| 25 | 50000  | 29.260067 | 25 | 2 |
| 26 | 7000   | 33.327562 | 16 | 2 |
| 27 | 30000  | 31.501096 | 7  | 2 |
| 28 | 13000  | 21.338211 | 3  | 2 |
| 29 | 30000  | 25.109569 | 8  | 2 |
| 30 | 20000  | 22.183642 | 16 | 2 |
| 31 | 20000  | 28.888889 | 10 | 2 |
| 32 | 60000  | 20.700817 | 11 | 2 |
| 33 | 25000  | 22.679952 | 12 | 2 |
| 34 | 30000  | 25.536704 | 30 | 2 |
| 35 | 40000  | 27.293224 | 8  | 2 |
| 36 | 30000  | 26.953125 | 2  | 2 |
| 37 | 30000  | 27.555556 | 7  | 2 |
| 38 | 30000  | 23.922423 | 22 | 2 |
| 39 | 115000 | 21.219136 | 1  | 2 |
| 40 | 12000  | 21.219136 | 1  | 2 |
| 41 | 30000  | 28        | 8  | 2 |
| 42 | 25000  | 25.536704 | 25 | 2 |
| 43 | 60000  | 25.802214 | 17 | 2 |
| 44 | 50000  | 34.293553 | 2  | 1 |
| 45 | 15000  | 25.536704 | 6  | 2 |
| 46 | 60000  | 26.666667 | 5  | 2 |
| 47 | 50000  | 24.654832 | 12 | 2 |
| 48 | 70000  | 32.87311  | 9  | 1 |
| 49 | 55000  | 29.777778 | 4  | 2 |
| 50 | 15000  | 32.466145 | 7  | 2 |
| 51 | 30000  | 32.297866 | 5  | 2 |
| 52 | 35000  | 24.386526 | 4  | 2 |

|    |        |           |    |   |
|----|--------|-----------|----|---|
| 1  |        |           |    |   |
| 2  | 20000  | 33.327562 | 1  | 2 |
| 3  | 30000  | 21.641274 | 8  | 1 |
| 4  | 20000  | 25.333333 | 6  | 2 |
| 5  | 75000  | 26.479182 | 5  | 2 |
| 6  | 10000  | 30.297784 | 1  | 2 |
| 7  | 200000 | 24.557752 | 5  | 2 |
| 8  | 30000  | 29.27796  | 20 | 2 |
| 9  | 35000  | 21.631149 | 3  | 1 |
| 10 | 20000  | 23.805402 | 3  | 2 |
| 11 | 20000  | 24.034407 | 8  | 1 |
| 12 | 30000  | 24.034407 | 5  | 1 |
| 13 | 5000   | 27.110583 | 4  | 1 |
| 14 | 40000  | 25.148605 | 3  | 2 |
| 15 | 50000  | 28.763971 | 1  | 2 |
| 16 | 50000  | 21.564545 | 1  | 2 |
| 17 | 50000  | 23.875115 | 15 | 2 |
| 18 | 35000  | 23.79536  | 2  | 1 |
| 19 | 40000  | 26.953125 | 1  | 2 |
| 20 | 15000  | 32.8125   | 12 | 1 |
| 21 | 200000 | 22.340297 | 1  | 2 |
| 22 | 100000 | 26.953125 | 10 | 1 |
| 23 | 30000  | 22.265625 | 5  | 1 |
| 24 | 50000  | 20.68515  | 11 | 2 |
| 25 | 20000  | 28.049671 | 1  | 2 |
| 26 | 10000  | 25.536704 | 15 | 1 |
| 27 | 40000  | 26.709402 | 16 | 1 |
| 28 | 6000   | 26.666667 | 20 | 1 |
| 29 | 10000  | 23.225432 | 1  | 2 |
| 30 | 20000  | 26.573129 | 1  | 2 |
| 31 | 30000  | 22.031726 | 1  | 2 |
| 32 | 10000  | 26.672763 | 3  | 2 |
| 33 | 30000  | 30.078125 | 1  | 2 |
| 34 | 35000  | 26.171875 | 4  | 2 |
| 35 | 30000  | 25.689562 | 12 | 2 |
| 36 | 20000  | 22.30815  | 3  | 2 |
| 37 | 30000  | 24.508946 | 4  | 2 |
| 38 | 20000  | 21.875    | 3  | 2 |
| 39 | 10000  | 26.438071 | 3  | 2 |
| 40 | 15000  | 26.171875 | 10 | 2 |
| 41 | 16000  | 18.552876 | 22 | 2 |
| 42 | 25000  | 25.390625 | 7  | 2 |
| 43 | 90000  | 25.631167 | 14 | 2 |
| 44 | 5000   | 25.039919 | 4  | 2 |
| 45 | 40000  | 21.564545 | 3  | 2 |
| 46 | 60000  | 21.192742 | 8  | 2 |
| 47 | 30000  | 29.320988 | 10 | 2 |
| 48 | 40000  | 26.83518  | 5  | 2 |
| 49 | 20000  | 27.005131 | 8  | 1 |
| 50 | 30000  | 25.402816 | 2  | 2 |
| 51 | 50000  | 25.039919 | 15 | 2 |

|    |        |           |    |   |
|----|--------|-----------|----|---|
| 1  |        |           |    |   |
| 2  | 50000  | 23.805402 | 3  | 2 |
| 3  | 9000   | 24.034407 | 8  | 1 |
| 4  | 20000  | 24.034407 | 5  | 1 |
| 5  | 90000  | 27.110583 | 4  | 1 |
| 6  | 20000  | 25.148605 | 3  | 2 |
| 7  | 40000  | 28.763971 | 1  | 2 |
| 8  | 30000  | 21.564545 | 1  | 2 |
| 9  | 20000  | 23.875115 | 15 | 2 |
| 10 | 30000  | 23.79536  | 2  | 1 |
| 11 | 20000  | 26.953125 | 1  | 2 |
| 12 | 45000  | 32.8125   | 12 | 1 |
| 13 | 50000  | 24.034407 | 8  | 1 |
| 14 | 2000   | 24.034407 | 5  | 1 |
| 15 | 20000  | 27.110583 | 4  | 1 |
| 16 | 200000 | 25.148605 | 3  | 2 |
| 17 | 20000  | 28.763971 | 1  | 2 |
| 18 | 50000  | 21.564545 | 1  | 2 |
| 19 | 40000  | 23.875115 | 15 | 2 |
| 20 | 20000  | 23.79536  | 2  | 1 |
| 21 | 5000   | 26.953125 | 1  | 2 |
| 22 | 20000  | 32.8125   | 12 | 2 |
| 23 | 30000  | 22.340297 | 1  | 2 |
| 24 | 20000  | 26.638918 | 4  | 1 |
| 25 | 10000  | 32.888889 | 10 | 1 |
| 26 | 30000  | 22.151023 | 3  | 2 |
| 27 | 10000  | 23.29072  | 4  | 2 |
| 28 | 35000  | 24.594907 | 10 | 2 |
| 29 | 30000  | 30.297784 | 15 | 1 |
| 30 | 20000  | 21.218317 | 4  | 1 |
| 31 | 30000  | 30.222222 | 4  | 1 |
| 32 | 20000  | 22.94213  | 3  | 2 |
| 33 | 5000   | 32.089436 | 12 | 1 |
| 34 | 10000  | 28.999307 | 10 | 2 |
| 35 | 20000  | 27.970679 | 8  | 2 |
| 36 | 50000  | 24.141519 | 4  | 1 |
| 37 | 30000  | 29.333333 | 7  | 1 |
| 38 | 10000  | 24.141519 | 6  | 2 |
| 39 | 15000  | 23.29072  | 4  | 2 |
| 40 | 30000  | 24.594907 | 10 | 2 |
| 41 | 35000  | 25.333333 | 6  | 2 |
| 42 | 30000  | 26.479182 | 5  | 2 |
| 43 | 15000  | 30.297784 | 1  | 2 |
| 44 | 20000  | 24.557752 | 5  | 2 |
| 45 | 30000  | 29.27796  | 20 | 1 |
| 46 | 20000  | 21.631149 | 3  | 1 |
| 47 | 10000  | 23.805402 | 3  | 2 |
| 48 | 2000   | 24.034407 | 8  | 1 |
| 49 | 15000  | 27.829314 | 7  | 2 |
| 50 | 10000  | 27.110583 | 4  | 1 |
| 51 | 3000   | 25.148605 | 3  | 2 |

|    |        |           |    |   |
|----|--------|-----------|----|---|
| 1  |        |           |    |   |
| 2  | 15000  | 28.763971 | 1  | 2 |
| 3  | 15000  | 18.961927 | 15 | 1 |
| 4  | 20000  | 27.407657 | 3  | 2 |
| 5  | 10000  | 21.367521 | 1  | 2 |
| 6  | 5000   | 24.609375 | 2  | 2 |
| 7  | 10000  | 27.815882 | 3  | 1 |
| 8  | 20000  | 26.041667 | 10 | 1 |
| 9  | 20000  | 22.640865 | 4  | 2 |
| 10 | 10000  | 25.390219 | 1  | 2 |
| 11 | 10000  | 42.344045 | 6  | 1 |
| 12 | 100000 | 24.654832 | 10 | 1 |
| 13 | 20000  | 24.112654 | 2  | 2 |
| 14 | 20000  | 24.243918 | 7  | 1 |
| 15 | 10000  | 24.394821 | 5  | 2 |
| 16 | 20000  | 27.239224 | 4  | 2 |
| 17 | 15000  | 28.452932 | 6  | 2 |
| 18 | 5000   | 26.040052 | 1  | 2 |
| 19 | 10000  | 19.723866 | 6  | 2 |
| 20 | 2000   | 26.52392  | 3  | 2 |
| 21 | 10000  | 21.913806 | 6  | 1 |
| 22 | 100000 | 24.243918 | 3  | 2 |
| 23 | 10000  | 28.452932 | 14 | 1 |
| 24 | 20000  | 28.3771   | 24 | 2 |
| 25 | 30000  | 28.617001 | 2  | 2 |
| 26 | 50000  | 27.19179  | 6  | 2 |
| 27 | 20000  | 25.878578 | 1  | 2 |
| 28 | 3000   | 31.346451 | 1  | 2 |
| 29 | 10000  | 34.722222 | 10 | 2 |
| 30 | 40000  | 23.833005 | 14 | 2 |
| 31 | 6000   | 29.899691 | 12 | 1 |
| 32 | 10000  | 24.677021 | 11 | 1 |
| 33 | 20000  | 29.27796  | 9  | 2 |
| 34 | 40000  | 18.025957 | 1  | 2 |
| 35 | 5000   | 25.155896 | 16 | 2 |
| 36 | 10000  | 25.333333 | 1  | 2 |
| 37 | 30000  | 23.828125 | 2  | 2 |
| 38 | 35000  | 29.333333 | 1  | 2 |
| 39 | 50000  | 23.337684 | 6  | 1 |
| 40 | 40000  | 32.71862  | 5  | 1 |
| 41 | 10000  | 22.600263 | 4  | 1 |
| 42 | 12000  | 24.03461  | 2  | 2 |
| 43 | 10000  | 24.034407 | 1  | 2 |
| 44 | 30000  | 34.319527 | 1  | 1 |
| 45 | 10000  | 28.672626 | 16 | 1 |
| 46 | 25000  | 28.935185 | 8  | 1 |
| 47 | 10000  | 32.310957 | 15 | 2 |
| 48 | 12000  | 23.046875 | 18 | 1 |
| 49 | 50000  | 24.221453 | 2  | 2 |
| 50 | 50000  | 20.957171 | 1  | 2 |
| 51 | 20000  | 23.624447 | 4  | 1 |

|    |        |           |    |   |
|----|--------|-----------|----|---|
| 1  |        |           |    |   |
| 2  | 300000 | 30.381944 | 10 | 2 |
| 3  | 30000  | 32.467532 | 2  | 2 |
| 4  | 15000  | 18.365473 | 5  | 2 |
| 5  | 5000   | 23.30668  | 10 | 1 |
| 6  | 20000  | 23.875433 | 20 | 2 |
| 7  | 40000  | 23.875115 | 1  | 1 |
| 8  | 20000  | 24.910767 | 9  | 1 |
| 9  | 5000   | 21.926126 | 7  | 1 |
| 10 | 40000  | 37.105751 | 18 | 1 |
| 11 | 5000   | 30.483379 | 5  | 2 |
| 12 | 10000  | 25.876058 | 15 | 2 |
| 13 | 10000  | 23.191095 | 17 | 1 |
| 14 | 15000  | 31.555556 | 3  | 2 |
| 15 | 30000  | 27.630367 | 20 | 1 |
| 16 | 10000  | 24.141519 | 13 | 2 |
| 17 | 4000   | 29.081633 | 1  | 2 |
| 18 | 7000   | 32.466181 | 3  | 1 |
| 19 | 5000   | 30.131483 | 10 | 2 |
| 20 | 10000  | 34.244991 | 8  | 1 |
| 21 | 40000  | 32.049948 | 3  | 2 |
| 22 | 25000  | 27.887617 | 8  | 2 |
| 23 | 50000  | 27.766209 | 8  | 1 |
| 24 | 20000  | 22.222222 | 1  | 2 |
| 25 | 15000  | 22.65625  | 3  | 2 |
| 26 | 150000 | 27.887617 | 8  | 2 |
| 27 | 20000  | 43.671056 | 13 | 1 |
| 28 | 10000  | 30.297784 | 11 | 2 |
| 29 | 40000  | 28.133657 | 8  | 2 |
| 30 | 10000  | 24.141519 | 13 | 2 |
| 31 | 40000  | 28.935185 | 20 | 1 |
| 32 | 25000  | 29.488704 | 7  | 2 |
| 33 | 5000   | 29.136316 | 25 | 1 |
| 34 | 20000  | 23.805402 | 9  | 2 |
| 35 | 20000  | 34.244991 | 8  | 1 |
| 36 | 16000  | 30.080059 | 1  | 1 |
| 37 | 16000  | 21.096191 | 2  | 2 |
| 38 | 50000  | 23.805402 | 2  | 1 |
| 39 | 22000  | 28.040378 | 30 | 1 |
| 40 | 50000  | 25.224089 | 1  | 1 |
| 41 | 18000  | 29.591837 | 10 | 1 |
| 42 | 200000 | 26.037494 | 15 | 2 |
| 43 | 50000  | 24.913495 | 22 | 1 |
| 44 | 5000   | 26.122449 | 12 | 1 |
| 45 | 2000   | 28.69898  | 8  | 2 |
| 46 | 50000  | 22.038567 | 14 | 1 |
| 47 | 25000  | 28.30385  | 7  | 2 |
| 48 | 50000  | 24.609734 | 3  | 2 |
| 49 | 75000  | 26.397977 | 1  | 2 |
| 50 | 10000  | 24.913495 | 34 | 2 |
| 51 | 50000  | 23.4375   | 21 | 1 |

|    |        |           |    |   |
|----|--------|-----------|----|---|
| 1  |        |           |    |   |
| 2  | 80000  | 22.265625 | 18 | 2 |
| 3  | 30000  | 20.079601 | 10 | 1 |
| 4  | 12000  | 24.341758 | 4  | 2 |
| 5  | 50000  | 23.30668  | 3  | 1 |
| 6  | 5000   | 27.239224 | 5  | 1 |
| 7  | 100000 | 24.005487 | 1  | 2 |
| 8  | 50000  | 22.516308 | 8  | 1 |
| 9  | 15000  | 23.337684 | 4  | 2 |
| 10 | 50000  | 27.915519 | 5  | 1 |
| 11 | 20000  | 19.834711 | 8  | 2 |
| 12 | 80000  | 27.250887 | 8  | 1 |
| 13 | 400000 | 24.304618 | 3  | 1 |
| 14 | 40000  | 26.314635 | 1  | 1 |
| 15 | 20000  | 23.309053 | 12 | 2 |
| 16 | 50000  | 27.303438 | 1  | 2 |
| 17 | 28000  | 27.276334 | 4  | 2 |
| 18 | 40000  | 27.055151 | 4  | 2 |
| 19 | 5000   | 30.58802  | 1  | 2 |
| 20 | 10000  | 23.804801 | 4  | 2 |
| 21 | 90000  | 27.111111 | 3  | 2 |
| 22 | 50000  | 24.238227 | 4  | 1 |
| 23 | 35000  | 21.580034 | 4  | 2 |
| 24 | 31000  | 31.866825 | 14 | 1 |
| 25 | 20000  | 26.397977 | 22 | 2 |
| 26 | 25000  | 26.402355 | 3  | 1 |
| 27 | 80000  | 25.654372 | 15 | 1 |
| 28 | 15000  | 21.218317 | 2  | 2 |
| 29 | 30000  | 28.90625  | 19 | 2 |
| 30 | 40000  | 33.59375  | 1  | 2 |
| 31 | 35000  | 25.864512 | 15 | 2 |
| 32 | 20000  | 25.78125  | 8  | 2 |
| 33 | 50000  | 23.12467  | 8  | 2 |
| 34 | 50000  | 22.212967 | 7  | 2 |
| 35 | 50000  | 22.476587 | 13 | 2 |
| 36 | 22000  | 25.711662 | 0  | 2 |
| 37 | 20000  | 20.86112  | 20 | 1 |
| 38 | 50000  | 22.83737  | 5  | 2 |
| 39 | 10000  | 21.513859 | 6  | 2 |
| 40 | 30000  | 25.636917 | 2  | 2 |
| 41 | 20000  | 23.233456 | 3  | 1 |
| 42 | 10000  | 23.738662 | 7  | 2 |
| 43 | 65000  | 25.529645 | 12 | 2 |
| 44 | 20000  | 30.42185  | 5  | 2 |
| 45 | 5000   | 25        | 1  | 2 |
| 46 | 15000  | 20.957171 | 11 | 1 |
| 47 | 20000  | 27.639801 | 14 | 2 |
| 48 | 5000   | 24.973985 | 13 | 2 |
| 49 | 50000  | 29.402273 | 2  | 2 |
| 50 | 40000  | 23.875115 | 11 | 1 |
| 51 | 15000  | 20.79673  | 10 | 2 |

|    |        |           |    |   |
|----|--------|-----------|----|---|
| 1  |        |           |    |   |
| 2  | 12000  | 24.654832 | 5  | 1 |
| 3  | 50000  | 24.444444 | 7  | 2 |
| 4  | 50000  | 22.370343 | 4  | 2 |
| 5  | 20000  | 22.0741   | 20 | 1 |
| 6  | 4000   | 32        | 1  | 2 |
| 7  | 10000  | 27.705259 | 2  | 2 |
| 8  | 50000  | 25.076193 | 11 | 2 |
| 9  | 25000  | 21.50447  | 2  | 1 |
| 10 | 15000  | 23.456558 | 6  | 1 |
| 11 | 30000  | 27.209608 | 11 | 2 |
| 12 | 20000  | 29.515939 | 14 | 1 |
| 13 | 7000   | 33.747704 | 3  | 1 |
| 14 | 15000  | 32.731601 | 1  | 2 |
| 15 | 100000 | 27.678739 | 9  | 1 |
| 16 | 20000  | 23.068051 | 6  | 1 |
| 17 | 140000 | 27.19179  | 10 | 1 |
| 18 | 40000  | 26.775934 | 3  | 2 |
| 19 | 17000  | 27.678739 | 3  | 2 |
| 20 | 27000  | 20.829201 | 7  | 1 |
| 21 | 20000  | 26.022644 | 9  | 1 |
| 22 | 100000 | 27.111111 | 3  | 2 |
| 23 | 25000  | 24.671053 | 6  | 2 |
| 24 | 22000  | 24.196494 | 13 | 1 |
| 25 | 50000  | 30.747867 | 3  | 2 |
| 26 | 15000  | 30.63043  | 4  | 1 |
| 27 | 30000  | 18.986591 | 10 | 1 |
| 28 | 100000 | 24.141519 | 4  | 1 |
| 29 | 35000  | 26.93572  | 15 | 1 |
| 30 | 20000  | 33.227534 | 1  | 1 |
| 31 | 25000  | 24.526818 | 9  | 1 |
| 32 | 10000  | 45.880092 | 2  | 1 |
| 33 | 12000  | 28.25097  | 12 | 1 |
| 34 | 20000  | 33.694938 | 2  | 1 |
| 35 | 25000  | 23.612751 | 6  | 1 |
| 36 | 40000  | 17.258383 | 5  | 1 |
| 37 | 100000 | 17.301038 | 1  | 2 |
| 38 | 12000  | 32.839182 | 6  | 1 |
| 39 | 5000   | 25.299376 | 9  | 1 |
| 40 | 200000 | 32.310957 | 2  | 2 |
| 41 | 20000  | 21.641274 | 2  | 2 |
| 42 | 30000  | 21.580034 | 6  | 1 |
| 43 | 20000  | 28.935185 | 4  | 1 |
| 44 | 10000  | 27.276334 | 5  | 1 |
| 45 | 7000   | 27.970679 | 5  | 1 |
| 46 | 18000  | 26.912726 | 8  | 1 |
| 47 | 20000  | 34.435262 | 2  | 1 |
| 48 | 30000  | 28.133657 | 4  | 1 |
| 49 | 20000  | 23.191095 | 1  | 1 |
| 50 | 50000  | 26.271345 | 10 | 1 |
| 51 | 10000  | 30.110279 | 14 | 2 |



|    |        |           |    |   |
|----|--------|-----------|----|---|
| 1  |        |           |    |   |
| 2  | 35000  | 29.269972 | 12 | 1 |
| 3  | 50000  | 32.454717 | 1  | 1 |
| 4  | 15000  | 30.801249 | 9  | 2 |
| 5  | 150000 | 27.555556 | 1  | 2 |
| 6  | 10000  | 31.297374 | 16 | 1 |
| 7  | 50000  | 25.452358 | 12 | 1 |
| 8  | 50000  | 26.377898 | 4  | 2 |
| 9  | 10000  | 35.707201 | 1  | 2 |
| 10 | 30000  | 23.47303  | 5  | 1 |
| 11 | 30000  | 30.730609 | 2  | 2 |
| 12 | 50000  | 28.30385  | 1  | 1 |
| 13 | 20000  | 26.222685 | 1  | 2 |
| 14 | 50000  | 34.696859 | 1  | 2 |
| 15 | 30000  | 29.03179  | 9  | 1 |
| 16 | 30000  | 23.630401 | 8  | 2 |
| 17 | 25000  | 29.432133 | 6  | 2 |
| 18 | 50000  | 20.239501 | 1  | 1 |
| 19 | 10000  | 23.495237 | 9  | 1 |
| 20 | 100000 | 27.392257 | 1  | 2 |
| 21 | 20000  | 27.766209 | 2  | 1 |
| 22 | 20000  | 16.976007 | 1  | 2 |
| 23 | 60000  | 24        | 5  | 2 |
| 24 | 10000  | 22.89282  | 1  | 1 |
| 25 | 10000  | 21.777778 | 10 | 1 |
| 26 | 10000  | 22.0741   | 5  | 1 |
| 27 | 20000  | 29.903029 | 5  | 2 |
| 28 | 40000  | 26.753213 | 18 | 1 |
| 29 | 30000  | 23.804801 | 2  | 1 |
| 30 | 30000  | 28.537455 | 10 | 2 |
| 31 | 10000  | 19.976219 | 6  | 2 |
| 32 | 30000  | 33.700518 | 11 | 2 |
| 33 | 100000 | 23.422368 | 13 | 2 |
| 34 | 50000  | 25.652633 | 5  | 2 |
| 35 | 12000  | 34.707761 | 1  | 2 |
| 36 | 20000  | 23.244595 | 4  | 1 |
| 37 | 100000 | 17.857143 | 6  | 1 |
| 38 | 100000 | 27.586207 | 18 | 2 |
| 39 | 10000  | 21.580034 | 3  | 1 |
| 40 | 15000  | 27.110583 | 9  | 2 |
| 41 | 30000  | 17.301038 | 11 | 1 |
| 42 | 20000  | 27.471384 | 3  | 2 |
| 43 | 50000  | 29.968783 | 4  | 1 |
| 44 | 15000  | 26.840668 | 6  | 2 |
| 45 | 18000  | 22.222222 | 5  | 2 |
| 46 | 30000  | 27.055151 | 6  | 1 |
| 47 | 175000 | 27.766209 | 1  | 1 |
| 48 | 20000  | 21.701389 | 15 | 2 |
| 49 | 50000  | 23.183391 | 6  | 2 |
| 50 | 60000  | 26.672763 | 8  | 1 |
| 51 | 30000  | 25.109569 | 5  | 1 |

|    |        |           |     |   |
|----|--------|-----------|-----|---|
| 1  |        |           |     |   |
| 2  | 60000  | 22.491349 | 5   | 1 |
| 3  | 100000 | 24.121749 | 12  | 2 |
| 4  | 35000  | 22.521508 | 1   | 2 |
| 5  | 15000  | 31.992171 | 6   | 1 |
| 6  | 30000  | 32.839182 | 3   | 2 |
| 7  | 5000   | 22.826881 | 2   | 2 |
| 8  | 15000  | 24.444444 | 6   | 2 |
| 9  | 25000  | 23.456558 | 3   | 2 |
| 10 | 30000  | 25.333333 | 3   | 2 |
| 11 | 25000  | 24.444444 | 1   | 2 |
| 12 | 20000  | 20.761246 | 10  | 1 |
| 13 | 20000  | 23.148148 | 3   | 1 |
| 14 | 15000  | 24.341758 | 2.5 | 2 |
| 15 | 40000  | 22.222222 | 12  | 2 |
| 16 | 27000  | 24.451073 | 10  | 2 |
| 17 | 1000   | 22.826881 | 3   | 2 |
| 18 | 10000  | 21.457268 | 5   | 1 |
| 19 | 10000  | 26.896181 | 3   | 2 |
| 20 | 13000  | 27.055151 | 10  | 2 |
| 21 | 10000  | 23.495237 | 2   | 2 |
| 22 | 40000  | 27.02581  | 4   | 2 |
| 23 | 25000  | 25.510204 | 4   | 2 |
| 24 | 20000  | 28.804414 | 3   | 1 |
| 25 | 30000  | 31.957633 | 3   | 1 |
| 26 | 6000   | 24.796667 | 6   | 2 |
| 27 | 8000   | 20.811655 | 5   | 2 |
| 28 | 40000  | 22.213678 | 5   | 2 |
| 29 | 60000  | 19.290123 | 2   | 2 |
| 30 | 50000  | 26.314635 | 2   | 1 |
| 31 | 60000  | 18.765247 | 1   | 2 |
| 32 | 25000  | 30.700408 | 6   | 2 |
| 33 | 50000  | 25.333333 | 7   | 2 |
| 34 | 50000  | 23.225432 | 8   | 1 |
| 35 | 5000   | 22.222222 | 1   | 2 |
| 36 | 7000   | 25.910684 | 3   | 2 |
| 37 | 8000   | 24.801587 | 2   | 2 |
| 38 | 10000  | 19.817677 | 2   | 2 |
| 39 | 25000  | 19.396188 | 12  | 2 |
| 40 | 50000  | 23.725286 | 4   | 2 |
| 41 | 50000  | 25.390625 | 2   | 1 |
| 42 | 15000  | 20.811655 | 3   | 1 |
| 43 | 15000  | 18.645344 | 6   | 1 |
| 44 | 35000  | 23.4375   | 2   | 2 |
| 45 | 3500   | 25.887574 | 4   | 2 |
| 46 | 1000   | 25.969529 | 5   | 1 |
| 47 | 35000  | 21.227888 | 5   | 2 |
| 48 | 8000   | 38.049941 | 4   | 2 |
| 49 | 20000  | 27.681661 | 8   | 2 |
| 50 | 15000  | 23.4375   | 1   | 2 |
| 51 | 15000  | 28        | 8   | 2 |

|    |        |           |    |   |
|----|--------|-----------|----|---|
| 1  |        |           |    |   |
| 2  | 1000   | 19.051974 | 10 | 1 |
| 3  | 16000  | 27.34375  | 2  | 1 |
| 4  | 12000  | 21.952479 | 5  | 1 |
| 5  | 20000  | 20.811655 | 3  | 1 |
| 6  | 20000  | 24.221453 | 1  | 2 |
| 7  | 20000  | 24.221453 | 1  | 2 |
| 8  | 10000  | 19.53125  | 10 | 1 |
| 9  | 8000   | 24.21875  | 3  | 2 |
| 10 | 10000  | 22.89282  | 1  | 2 |
| 11 | 50000  | 21.564545 | 8  | 2 |
| 12 | 12000  | 35.209546 | 1  | 2 |
| 13 | 12000  | 35.209546 | 1  | 2 |
| 14 | 10000  | 31.111111 | 12 | 2 |
| 15 | 5000   | 22.862369 | 1  | 1 |
| 16 | 10000  | 30.222222 | 6  | 2 |
| 17 | 20000  | 31.217482 | 4  | 2 |
| 18 | 15000  | 21.750197 | 8  | 2 |
| 19 | 15000  | 21.750197 | 8  | 2 |
| 20 | 10000  | 22.862369 | 6  | 2 |
| 21 | 9000   | 23.588329 | 10 | 2 |
| 22 | 15000  | 32.79321  | 7  | 2 |
| 23 | 5000   | 20        | 10 | 2 |
| 24 | 5000   | 20        | 10 | 2 |
| 25 | 8000   | 28.14787  | 4  | 2 |
| 26 | 10000  | 31.111111 | 20 | 2 |
| 27 | 20000  | 22.222222 | 7  | 2 |
| 28 | 15000  | 31.46837  | 1  | 2 |
| 29 | 20000  | 30.612245 | 14 | 2 |
| 30 | 20000  | 30.612245 | 14 | 2 |
| 31 | 10000  | 25.566107 | 8  | 2 |
| 32 | 15000  | 33.217993 | 8  | 1 |
| 33 | 10000  | 24.121749 | 7  | 1 |
| 34 | 20000  | 24.977043 | 5  | 1 |
| 35 | 8000   | 28.888889 | 10 | 1 |
| 36 | 8000   | 28.888889 | 10 | 1 |
| 37 | 3000   | 21.303949 | 8  | 2 |
| 38 | 50000  | 21.222808 | 20 | 2 |
| 39 | 20000  | 30.102119 | 16 | 1 |
| 40 | 15000  | 29.296875 | 1  | 2 |
| 41 | 15000  | 29.296875 | 1  | 2 |
| 42 | 15000  | 23.388687 | 3  | 2 |
| 43 | 20000  | 29.260067 | 1  | 1 |
| 44 | 10000  | 27.845845 | 20 | 2 |
| 45 | 15000  | 25.109569 | 5  | 2 |
| 46 | 15000  | 26.709402 | 10 | 1 |
| 47 | 15000  | 26.709402 | 10 | 1 |
| 48 | 15000  | 23.183391 | 7  | 1 |
| 49 | 20000  | 28.577961 | 2  | 1 |
| 50 | 500000 | 27.111111 | 15 | 1 |
| 51 | 20000  | 28.763971 | 8  | 2 |
| 52 | 35000  | 27.268006 | 3  | 2 |
| 53 | 35000  | 27.268006 | 3  | 2 |
| 54 | 5000   | 22.347782 | 8  | 1 |
| 55 | 25000  | 31.163435 | 4  | 1 |
| 56 | 35000  | 22.476587 | 3  | 1 |
| 57 | 10000  | 18.666667 | 10 | 1 |
| 58 | 15000  | 21.641274 | 1  | 1 |
| 59 | 15000  | 21.641274 | 1  | 1 |
| 60 | 10000  | 21.333333 | 1  | 2 |
|    | 14000  | 20.451843 | 1  | 1 |

|    |       |           |    |   |
|----|-------|-----------|----|---|
| 1  |       |           |    |   |
| 2  | 10000 | 24.888889 | 3  | 1 |
| 3  | 15000 | 20.775623 | 3  | 1 |
| 4  | 10000 | 19.477147 | 4  | 2 |
| 5  | 30000 | 22.89282  | 1  | 2 |
| 6  | 10000 | 22.265625 | 7  | 1 |
| 7  | 7000  | 26.93572  | 5  | 1 |
| 8  | 10000 | 20.195092 | 1  | 1 |
| 9  | 10000 | 21.096191 | 9  | 1 |
| 10 | 10000 | 21.096191 | 9  | 1 |
| 11 | 50000 | 20.504934 | 12 | 1 |
| 12 | 35000 | 27.815882 | 2  | 1 |
| 13 | 35000 | 27.815882 | 2  | 1 |
| 14 | 6000  | 19.909972 | 15 | 1 |
| 15 | 10000 | 24.526818 | 5  | 1 |
| 16 | 8000  | 24.386526 | 7  | 2 |
| 17 | 2000  | 19.290123 | 7  | 2 |
| 18 | 3000  | 22.222222 | 12 | 1 |
| 19 | 3000  | 22.222222 | 12 | 1 |
| 20 | 15000 | 22.829964 | 3  | 2 |
| 21 | 90000 | 23.555556 | 6  | 2 |
| 22 | 10000 | 22.640865 | 10 | 2 |
| 23 | 10000 | 22.582709 | 3  | 1 |
| 24 | 10000 | 22.582709 | 3  | 1 |
| 25 | 10000 | 14.0625   | 20 | 1 |
| 26 | 15000 | 18.517804 | 7  | 2 |
| 27 | 50000 | 26.291724 | 3  | 1 |
| 28 | 20000 | 21.303949 | 4  | 2 |
| 29 | 2000  | 15.055139 | 12 | 2 |
| 30 | 2000  | 15.055139 | 12 | 2 |
| 31 | 6000  | 21.773842 | 14 | 1 |
| 32 | 10000 | 43.801653 | 8  | 1 |
| 33 | 2000  | 25.510204 | 15 | 1 |
| 34 | 10000 | 21.641274 | 10 | 1 |
| 35 | 10000 | 21.641274 | 10 | 1 |
| 36 | 50000 | 17.008821 | 1  | 2 |
| 37 | 10000 | 24.767566 | 2  | 2 |
| 38 | 15000 | 22.862369 | 13 | 2 |
| 39 | 35000 | 19.84127  | 1  | 1 |
| 40 | 5000  | 19.227688 | 9  | 1 |
| 41 | 5000  | 19.227688 | 9  | 1 |
| 42 | 3000  | 22.265625 | 2  | 1 |
| 43 | 20000 | 20.504934 | 11 | 2 |
| 44 | 20000 | 23.191095 | 3  | 1 |
| 45 | 20000 | 23.4375   | 1  | 2 |
| 46 | 10000 | 20.936639 | 2  | 2 |
| 47 | 10000 | 16.447368 | 8  | 1 |
| 48 | 10000 | 16.447368 | 8  | 1 |
| 49 | 25000 | 21.501886 | 1  | 1 |
| 50 | 10000 | 20.079601 | 1  | 1 |
| 51 | 15000 | 22.313278 | 5  | 2 |
| 52 | 10000 | 20.281233 | 18 | 1 |
| 53 | 10000 | 20.281233 | 18 | 1 |
| 54 | 3000  | 21.230572 | 19 | 1 |
| 55 | 30000 | 20.957171 | 24 | 2 |
| 56 | 5000  | 24.341758 | 15 | 1 |
| 57 | 5000  | 21.338211 | 30 | 1 |
| 58 | 8000  | 22.37568  | 3  | 2 |
| 59 | 8000  | 22.37568  | 3  | 2 |
| 60 | 10000 | 22.189349 | 12 | 1 |
|    | 50000 | 21.71925  | 18 | 1 |

|    |        |           |    |   |
|----|--------|-----------|----|---|
| 1  |        |           |    |   |
| 2  | 6000   | 20.545694 | 10 | 1 |
| 3  | 20000  | 24.386526 | 16 | 1 |
| 4  | 12000  | 29.069767 | 12 | 1 |
| 5  | 5000   | 29.069767 | 12 | 1 |
| 6  | 2000   | 21.875    | 8  | 2 |
| 7  | 10000  | 30.863036 | 9  | 1 |
| 8  | 8000   | 26.027582 | 2  | 2 |
| 9  | 10000  | 21.227888 | 36 | 2 |
| 10 | 5000   | 20.957171 | 24 | 2 |
| 11 | 10000  | 21.007668 | 3  | 1 |
| 12 | 20000  | 24.092971 | 5  | 2 |
| 13 | 16000  | 27.47624  | 10 | 1 |
| 14 | 3000   | 23.738662 | 8  | 1 |
| 15 | 5000   | 28.959    | 4  | 1 |
| 16 | 10000  | 25.964542 | 9  | 1 |
| 17 | 40000  | 22.265625 | 2  | 2 |
| 18 | 2000   | 24.304618 | 10 | 1 |
| 19 | 10000  | 18.559557 | 12 | 1 |
| 20 | 5000   | 24.677021 | 15 | 1 |
| 21 | 10000  | 15.943878 | 12 | 1 |
| 22 | 20000  | 22.83737  | 5  | 1 |
| 23 | 100000 | 19.692665 | 12 | 1 |
| 24 | 15000  | 23.337684 | 10 | 1 |
| 25 | 18000  | 22.491349 | 10 | 2 |
| 26 | 12000  | 19.53125  | 5  | 2 |
| 27 | 10000  | 21.936347 | 12 | 1 |
| 28 | 15000  | 18.305769 | 16 | 1 |
| 29 | 10000  | 29.721079 | 15 | 1 |
| 30 | 10000  | 25.344353 | 8  | 2 |
| 31 | 5000   | 17.71542  | 1  | 1 |
| 32 | 30000  | 21.192742 | 2  | 1 |
| 33 | 3000   | 26.171875 | 2  | 2 |
| 34 | 25000  | 20.545694 | 20 | 1 |
| 35 | 50000  | 21.333333 | 7  | 1 |
| 36 | 30000  | 23.458562 | 10 | 1 |
| 37 | 10000  | 19.396188 | 9  | 1 |
| 38 | 2000   | 17.1875   | 20 | 2 |
| 39 | 15000  | 29.7442   | 1  | 2 |
| 40 | 100000 | 21.671258 | 22 | 1 |
| 41 | 15000  | 29.054752 | 15 | 2 |
| 42 | 20000  | 21.383942 | 15 | 1 |
| 43 | 30000  | 23.566632 | 3  | 1 |
| 44 | 80000  | 22.600263 | 17 | 1 |
| 45 | 22000  | 24.382716 | 10 | 1 |
| 46 | 80000  | 25.076193 | 12 | 1 |
| 47 | 20000  | 25.951557 | 3  | 1 |
| 48 | 30000  | 26.233556 | 7  | 1 |
| 49 | 2000   | 19.051974 | 6  | 2 |
| 50 | 9000   | 22.476587 | 10 | 2 |
| 51 | 30000  | 22.679952 | 3  | 1 |

|    |        |           |    |   |
|----|--------|-----------|----|---|
| 1  |        |           |    |   |
| 2  | 50000  | 22.862369 | 7  | 1 |
| 3  | 25000  | 20.775623 | 2  | 2 |
| 4  | 120000 | 23.781213 | 4  | 2 |
| 5  | 12000  | 22.518296 | 20 | 2 |
| 6  | 20000  | 22.984009 | 3  | 1 |
| 7  | 5000   | 18.591037 | 5  | 1 |
| 8  | 50000  | 24.776795 | 10 | 2 |
| 9  | 25000  | 26.479182 | 9  | 1 |
| 10 | 12000  | 25.148605 | 6  | 2 |
| 11 | 120000 | 25.969529 | 5  | 1 |
| 12 | 20000  | 46.237245 | 12 | 1 |
| 13 | 20000  | 27.407657 | 3  | 2 |
| 14 | 10000  | 23.805402 | 4  | 1 |
| 15 | 10000  | 18.08021  | 7  | 1 |
| 16 | 20000  | 32.142857 | 2  | 1 |
| 17 | 15000  | 23.337684 | 6  | 2 |
| 18 | 10000  | 24.21875  | 3  | 2 |
| 19 | 20000  | 26.142688 | 14 | 2 |
| 20 | 15000  | 33.770449 | 1  | 2 |
| 21 | 100000 | 25.78125  | 15 | 1 |
| 22 | 15000  | 21.701389 | 1  | 1 |
| 23 | 40000  | 26.672763 | 8  | 2 |
| 24 | 15000  | 27.678739 | 1  | 2 |
| 25 | 10000  | 18.510806 | 1  | 1 |
| 26 | 12000  | 21.359915 | 12 | 2 |
| 27 | 8000   | 25.23634  | 1  | 2 |
| 28 | 20000  | 24.524346 | 1  | 1 |
| 29 | 15000  | 18.858822 | 2  | 1 |
| 30 | 60000  | 29.515939 | 1  | 2 |
| 31 | 20000  | 26.753213 | 8  | 2 |
| 32 | 25000  | 24.323229 | 1  | 2 |
| 33 | 18000  | 21.00073  | 7  | 1 |
| 34 | 7000   | 24.03461  | 5  | 2 |
| 35 | 9000   | 21.048048 | 8  | 2 |
| 36 | 15000  | 18.666667 | 16 | 1 |
| 37 | 7000   | 23.111111 | 5  | 2 |
| 38 | 15000  | 24.243918 | 3  | 2 |
| 39 | 5000   | 23.372576 | 5  | 2 |
| 40 | 5000   | 22.939751 | 4  | 1 |
| 41 | 10000  | 23.456558 | 4  | 2 |
| 42 | 20000  | 28.763971 | 1  | 2 |
| 43 | 5000   | 22.826881 | 13 | 1 |
| 44 | 20000  | 21.501886 | 4  | 2 |
| 45 | 6000   | 23.962052 | 4  | 1 |
| 46 | 3000   | 20.504934 | 8  | 1 |
| 47 | 5000   | 24.341758 | 2  | 2 |
| 48 | 45000  | 25        | 6  | 2 |
| 49 | 2000   | 20.342798 | 1  | 2 |
| 50 | 5000   | 18.369003 | 4  | 2 |
| 51 | 45000  | 21.875    | 2  | 1 |

|    |        |           |    |   |
|----|--------|-----------|----|---|
| 1  |        |           |    |   |
| 2  | 12000  | 22.832879 | 1  | 2 |
| 3  | 50000  | 18.325617 | 5  | 2 |
| 4  | 8000   | 24.349609 | 15 | 1 |
| 5  | 50000  | 25.15315  | 13 | 2 |
| 6  | 12000  | 18.420245 | 2  | 1 |
| 7  | 10000  | 22.432303 | 18 | 1 |
| 8  | 10000  | 25.969529 | 4  | 2 |
| 9  | 7000   | 15.788781 | 2  | 1 |
| 10 | 20000  | 24.196494 | 15 | 2 |
| 11 | 10000  | 23.046875 | 8  | 1 |
| 12 | 2000   | 24.121749 | 5  | 2 |
| 13 | 25000  | 17.857143 | 10 | 2 |
| 14 | 20000  | 31.957633 | 3  | 2 |
| 15 | 6000   | 26.666667 | 3  | 2 |
| 16 | 6000   | 20.544193 | 8  | 1 |
| 17 | 3000   | 24.653031 | 12 | 1 |
| 18 | 10000  | 24.141519 | 2  | 1 |
| 19 | 5000   | 21.738005 | 2  | 2 |
| 20 | 2000   | 21.325134 | 4  | 2 |
| 21 | 10000  | 22.826881 | 11 | 1 |
| 22 | 75000  | 24.243918 | 14 | 1 |
| 23 | 20000  | 24.349609 | 1  | 2 |
| 24 | 10000  | 21.333333 | 8  | 2 |
| 25 | 8000   | 19.223376 | 30 | 2 |
| 26 | 4000   | 21.907582 | 8  | 1 |
| 27 | 20000  | 23.495237 | 6  | 2 |
| 28 | 10000  | 24.538965 | 3  | 2 |
| 29 | 20000  | 25.065746 | 21 | 1 |
| 30 | 30000  | 22.862369 | 5  | 1 |
| 31 | 10000  | 20.576132 | 15 | 1 |
| 32 | 12000  | 22.222222 | 3  | 2 |
| 33 | 100000 | 26.838648 | 1  | 2 |
| 34 | 20000  | 23.372576 | 6  | 2 |
| 35 | 5000   | 24.349609 | 20 | 2 |
| 36 | 10000  | 37.165632 | 6  | 2 |
| 37 | 15000  | 31.111111 | 4  | 2 |
| 38 | 20000  | 25.47666  | 1  | 1 |
| 39 | 5000   | 28.617001 | 4  | 1 |
| 40 | 20000  | 17.604773 | 1  | 1 |
| 41 | 15000  | 20.239501 | 4  | 2 |
| 42 | 6000   | 23.372576 | 4  | 2 |
| 43 | 10000  | 28.125    | 1  | 2 |
| 44 | 5000   | 28.444444 | 12 | 2 |
| 45 | 20000  | 23.828125 | 6  | 1 |
| 46 | 8000   | 26.838648 | 2  | 2 |
| 47 | 10000  | 21.457268 | 4  | 2 |
| 48 | 8000   | 28.196921 | 2  | 2 |
| 49 | 4000   | 22.313278 | 2  | 1 |
| 50 | 20000  | 17.625381 | 2  | 1 |
| 51 | 10000  | 18.256319 | 5  | 2 |

|    |       |           |    |   |
|----|-------|-----------|----|---|
| 1  |       |           |    |   |
| 2  | 20000 | 20.284799 | 4  | 2 |
| 3  | 30000 | 20.576132 | 5  | 2 |
| 4  | 10000 | 26.479182 | 5  | 2 |
| 5  | 40000 | 32.455678 | 3  | 2 |
| 6  | 20000 | 33.622088 | 22 | 1 |
| 7  | 1500  | 23.668639 | 3  | 1 |
| 8  | 30000 | 21.333333 | 18 | 1 |
| 9  | 5000  | 26.892323 | 5  | 2 |
| 10 | 10000 | 22.506925 | 2  | 2 |
| 11 | 12000 | 27.141582 | 1  | 2 |
| 12 | 10000 | 24.141519 | 7  | 1 |
| 13 | 18000 | 27.111111 | 1  | 2 |
| 14 | 8000  | 22.230987 | 5  | 2 |
| 15 | 10000 | 23.148148 | 20 | 2 |
| 16 | 10000 | 33.121307 | 1  | 2 |
| 17 | 6000  | 26.672763 | 1  | 2 |
| 18 | 5000  | 24.767566 | 1  | 2 |
| 19 | 60000 | 26.672763 | 3  | 2 |
| 20 | 9000  | 20.281233 | 1  | 2 |
| 21 | 30000 | 20.775623 | 1  | 2 |
| 22 | 5000  | 21.096191 | 4  | 2 |
| 23 | 6000  | 19.051974 | 2  | 2 |
| 24 | 40000 | 29.333333 | 12 | 2 |
| 25 | 20000 | 21.096191 | 5  | 1 |
| 26 | 15000 | 28.408163 | 15 | 2 |
| 27 | 10000 | 33.284024 | 5  | 2 |
| 28 | 40000 | 26.026175 | 1  | 2 |
| 29 | 20000 | 25.344353 | 2  | 2 |
| 30 | 5000  | 26.89767  | 10 | 2 |
| 31 | 3000  | 21.219136 | 5  | 2 |
| 32 | 10000 | 24        | 5  | 2 |
| 33 | 40000 | 30.251934 | 4  | 2 |
| 34 | 20000 | 23.828125 | 1  | 2 |
| 35 | 40000 | 24.888889 | 1  | 2 |
| 36 | 3000  | 29.6875   | 3  | 2 |
| 37 | 10000 | 31.202564 | 2  | 2 |
| 38 | 15000 | 24.888889 | 2  | 1 |
| 39 | 4000  | 20.408163 | 2  | 2 |
| 40 | 12000 | 26.52392  | 3  | 2 |
| 41 | 10000 | 23.805402 | 1  | 2 |
| 42 | 15000 | 18.902038 | 17 | 1 |
| 43 | 14000 | 17.777778 | 7  | 2 |
| 44 | 4000  | 21.821067 | 1  | 2 |
| 45 | 5000  | 22.222222 | 2  | 2 |
| 46 | 4000  | 21.641274 | 10 | 2 |
| 47 | 3000  | 23.309053 | 12 | 1 |
| 48 | 2000  | 20.269357 | 6  | 2 |
| 49 | 30000 | 26.037494 | 3  | 2 |
| 50 | 7000  | 16.878858 | 2  | 1 |
| 51 | 10000 | 29.27796  | 1  | 2 |



|    |       |           |    |   |
|----|-------|-----------|----|---|
| 1  |       |           |    |   |
| 2  | 10000 | 23.4375   | 2  | 2 |
| 3  | 25000 | 23.148148 | 1  | 2 |
| 4  | 15000 | 25.969529 | 2  | 2 |
| 5  | 60000 | 19.396188 | 15 | 2 |
| 6  | 12000 | 27.700831 | 1  | 2 |
| 7  | 20000 | 24.238227 | 1  | 1 |
| 8  | 25000 | 24.888889 | 1  | 2 |
| 9  | 10000 | 24        | 3  | 2 |
| 10 | 40000 | 28.566482 | 2  | 2 |
| 11 | 10000 | 35.69304  | 4  | 1 |
| 12 | 20000 | 25.315454 | 1  | 2 |
| 13 | 10000 | 29.377583 | 5  | 2 |
| 14 | 30000 | 23.191095 | 4  | 2 |
| 15 | 40000 | 25.777778 | 1  | 2 |
| 16 | 15000 | 22.222222 | 1  | 1 |
| 17 | 10000 | 17.48179  | 20 | 2 |
| 18 | 3000  | 25.437481 | 2  | 2 |
| 19 | 50000 | 22.347782 | 3  | 2 |
| 20 | 15000 | 24.863952 | 1  | 2 |
| 21 | 11000 | 28.720083 | 18 | 2 |
| 22 | 9000  | 23.833005 | 3  | 2 |
| 23 | 50000 | 25.777778 | 10 | 2 |
| 24 | 60000 | 25.536704 | 2  | 2 |
| 25 | 20000 | 22.071078 | 2  | 2 |
| 26 | 7000  | 22.222222 | 30 | 2 |
| 27 | 10000 | 24.557752 | 12 | 2 |
| 28 | 20000 | 12.984765 | 4  | 2 |
| 29 | 20000 | 22.812934 | 2  | 2 |
| 30 | 7000  | 24.835763 | 12 | 1 |
| 31 | 20000 | 20.545694 | 10 | 2 |
| 32 | 7000  | 27.099251 | 1  | 2 |
| 33 | 3000  | 24.835763 | 2  | 2 |
| 34 | 15000 | 29.777778 | 1  | 2 |
| 35 | 6000  | 25.065746 | 3  | 2 |
| 36 | 20000 | 19.909972 | 10 | 2 |
| 37 | 5000  | 22.189349 | 17 | 2 |
| 38 | 30000 | 23.456558 | 3  | 2 |
| 39 | 15000 | 26.740477 | 5  | 2 |
| 40 | 20000 | 24.526818 | 18 | 2 |
| 41 | 3000  | 24        | 2  | 2 |
| 42 | 16000 | 20.888889 | 1  | 2 |
| 43 | 5000  | 27.555556 | 3  | 2 |
| 44 | 12000 | 15.555556 | 4  | 1 |
| 45 | 15000 | 26.666667 | 20 | 2 |
| 46 | 5000  | 18.730489 | 1  | 1 |
| 47 | 30000 | 19.477147 | 16 | 1 |
| 48 | 4000  | 25.636917 | 2  | 2 |
| 49 | 5000  | 26.564345 | 1  | 2 |
| 50 | 20000 | 22.222222 | 6  | 2 |
| 51 | 8000  | 25.065746 | 21 | 2 |

|    |        |           |    |   |
|----|--------|-----------|----|---|
| 1  |        |           |    |   |
| 2  | 15000  | 22.183642 | 1  | 2 |
| 3  | 8000   | 20.25463  | 1  | 2 |
| 4  | 7000   | 24.653031 | 6  | 2 |
| 5  | 10000  | 21.457268 | 1  | 2 |
| 6  | 20000  | 22.049165 | 1  | 2 |
| 7  | 16000  | 27.006173 | 3  | 1 |
| 8  | 15000  | 19.290123 | 1  | 2 |
| 9  | 35000  | 31.632653 | 3  | 2 |
| 10 | 19000  | 25.103878 | 10 | 1 |
| 11 | 7000   | 18.730489 | 2  | 2 |
| 12 | 150000 | 27.305188 | 1  | 2 |
| 13 | 22000  | 22.959184 | 4  | 2 |
| 14 | 6000   | 24.594907 | 6  | 1 |
| 15 | 6000   | 22.987427 | 13 | 2 |
| 16 | 10000  | 22.071078 | 16 | 2 |
| 17 | 6000   | 21.913806 | 8  | 2 |
| 18 | 30000  | 37.061362 | 2  | 2 |
| 19 | 15000  | 26.52392  | 5  | 2 |
| 20 | 30000  | 36.888889 | 1  | 2 |
| 21 | 5000   | 29.515939 | 1  | 2 |
| 22 | 9000   | 24.464602 | 8  | 1 |
| 23 | 20000  | 20.957171 | 8  | 1 |
| 24 | 5000   | 21.208449 | 15 | 1 |
| 25 | 7000   | 22.27531  | 24 | 1 |
| 26 | 7000   | 16.866251 | 3  | 2 |
| 27 | 20000  | 21.403092 | 2  | 2 |
| 28 | 1000   | 33.760388 | 4  | 2 |
| 29 | 20000  | 29.242109 | 8  | 1 |
| 30 | 20000  | 24.386526 | 10 | 2 |
| 31 | 12000  | 22.506925 | 1  | 2 |
| 32 | 5000   | 20.957171 | 3  | 1 |
| 33 | 20000  | 24.609375 | 14 | 1 |
| 34 | 7000   | 23.555556 | 4  | 2 |
| 35 | 8500   | 22.347782 | 9  | 2 |
| 36 | 20000  | 20.79673  | 5  | 2 |
| 37 | 8000   | 38.77551  | 2  | 2 |
| 38 | 5000   | 27.02581  | 5  | 1 |
| 39 | 7000   | 21.913806 | 5  | 1 |
| 40 | 20000  | 25.559414 | 5  | 2 |
| 41 | 10000  | 24.112654 | 1  | 2 |
| 42 | 40000  | 27.392257 | 2  | 2 |
| 43 | 10000  | 30.381944 | 1  | 2 |
| 44 | 10000  | 26.666667 | 1  | 2 |
| 45 | 5000   | 20.17264  | 7  | 2 |
| 46 | 150000 | 23.781213 | 3  | 1 |
| 47 | 15000  | 35.003199 | 12 | 2 |
| 48 | 10000  | 24.691358 | 5  | 1 |
| 49 | 12000  | 18.877551 | 5  | 2 |
| 50 | 20000  | 29.964328 | 1  | 2 |
| 51 | 25000  | 27.772267 | 6  | 2 |

|    |       |           |     |   |
|----|-------|-----------|-----|---|
| 1  |       |           |     |   |
| 2  | 8000  | 29.964328 | 7   | 1 |
| 3  | 10000 | 28.763971 | 1   | 2 |
| 4  | 8000  | 24.732461 | 1   | 2 |
| 5  | 10000 | 25.390625 | 2   | 2 |
| 6  |       |           |     |   |
| 7  | 15000 | 25        | 12  | 2 |
| 8  | 35000 | 20.68515  | 7   | 1 |
| 9  | 10000 | 20.888889 | 12  | 2 |
| 10 | 5000  | 23.92569  | 12  | 2 |
| 11 | 5000  | 23.011177 | 15  | 1 |
| 12 |       |           |     |   |
| 13 | 10000 | 22.769438 | 3   | 2 |
| 14 | 4000  | 24.888889 | 3   | 2 |
| 15 | 15000 | 25.566107 | 5   | 2 |
| 16 | 7000  | 25.299376 | 10  | 2 |
| 17 | 5000  | 15.788781 | 2   | 2 |
| 18 |       |           |     |   |
| 19 | 20000 | 23.372576 | 2   | 2 |
| 20 | 22000 | 26.502116 | 12  | 2 |
| 21 | 6000  | 26.438071 | 1   | 2 |
| 22 | 15000 | 28.841532 | 2   | 1 |
| 23 |       |           |     |   |
| 24 | 15000 | 27.111111 | 1   | 2 |
| 25 | 20000 | 25.390625 | 5   | 2 |
| 26 | 4000  | 16.888889 | 1   | 2 |
| 27 | 15000 | 16.444444 | 2   | 1 |
| 28 | 10000 | 18.974532 | 1   | 2 |
| 29 |       |           |     |   |
| 30 | 15000 | 24.196494 | 1.5 | 2 |
| 31 | 15000 | 27.700831 | 3   | 2 |
| 32 | 9000  | 25.559414 | 3   | 2 |
| 33 | 10000 | 31.111111 | 5   | 2 |
| 34 | 15000 | 20.451843 | 3   | 2 |
| 35 |       |           |     |   |
| 36 | 12000 | 28.537455 | 6   | 2 |
| 37 | 15000 | 27.239224 | 4   | 1 |
| 38 | 12000 | 28.888889 | 2   | 2 |
| 39 | 40000 | 19.341401 | 9   | 2 |
| 40 | 15000 | 23.111111 | 3   | 2 |
| 41 |       |           |     |   |
| 42 | 9000  | 20.775623 | 17  | 1 |
| 43 | 10000 | 24.940095 | 2   | 2 |
| 44 | 10000 | 19.500595 | 10  | 2 |
| 45 | 18000 | 20.661157 | 4   | 2 |
| 46 | 4000  | 28.305332 | 4   | 2 |
| 47 |       |           |     |   |
| 48 | 10000 | 27.303438 | 2   | 2 |
| 49 | 10000 | 25.333083 | 2   | 2 |
| 50 | 8000  | 20.444444 | 5   | 2 |
| 51 | 8000  | 25.333083 | 8   | 2 |
| 52 | 5000  | 29.166667 | 2   | 2 |
| 53 |       |           |     |   |
| 54 | 7000  | 19.290123 | 2   | 2 |
| 55 | 10000 | 24.776795 | 2   | 2 |
| 56 | 5000  | 40.972222 | 2   | 2 |
| 57 |       |           |     |   |
| 58 | 45000 | 26.740477 | 6   | 2 |
| 59 | 10000 | 23.875115 | 6   | 2 |
| 60 | 10000 | 24.386526 | 13  | 2 |
|    | 10000 | 18.261505 | 1   | 2 |

|    |        |           |    |   |
|----|--------|-----------|----|---|
| 1  |        |           |    |   |
| 2  | 10000  | 40.972222 | 9  | 2 |
| 3  | 15000  | 23.308867 | 8  | 2 |
| 4  | 10000  | 21.082813 | 3  | 1 |
| 5  | 10000  | 21.821067 | 5  | 2 |
| 6  | 45000  | 18.718042 | 8  | 1 |
| 7  | 20000  | 16.878858 | 2  | 2 |
| 8  | 15000  | 23.555556 | 20 | 1 |
| 9  | 15000  | 24.87772  | 10 | 2 |
| 10 | 8000   | 20.028842 | 2  | 2 |
| 11 | 20000  | 17.146776 | 3  | 2 |
| 12 | 30000  | 19.17458  | 3  | 2 |
| 13 | 20000  | 24.888889 | 13 | 1 |
| 14 | 7000   | 32.029086 | 4  | 1 |
| 15 | 20000  | 24.323229 | 5  | 1 |
| 16 | 50000  | 17.625381 | 12 | 1 |
| 17 | 8000   | 19.140625 | 12 | 1 |
| 18 | 70000  | 23.739956 | 25 | 2 |
| 19 | 10000  | 22.832879 | 23 | 1 |
| 20 | 10000  | 23.495237 | 8  | 2 |
| 21 | 50000  | 26.530612 | 6  | 2 |
| 22 | 60000  | 21.208449 | 10 | 1 |
| 23 | 5000   | 25.788534 | 9  | 2 |
| 24 | 8000   | 42.806183 | 1  | 2 |
| 25 | 32000  | 24.973985 | 1  | 2 |
| 26 | 25000  | 23.140496 | 2  | 1 |
| 27 | 30000  | 25.910684 | 5  | 1 |
| 28 | 20000  | 24.33748  | 1  | 2 |
| 29 | 15000  | 22.10029  | 15 | 2 |
| 30 | 30000  | 33.163265 | 13 | 2 |
| 31 | 500000 | 17.263545 | 3  | 2 |
| 32 | 20000  | 23.828125 | 5  | 2 |
| 33 | 15000  | 24.557752 | 2  | 1 |
| 34 | 30000  | 22.222222 | 12 | 1 |
| 35 | 20000  | 20        | 1  | 2 |
| 36 | 5000   | 31.25     | 3  | 2 |
| 37 | 8000   | 14.098461 | 2  | 1 |
| 38 | 7000   | 27.053803 | 28 | 1 |
| 39 | 10000  | 23.140496 | 1  | 2 |
| 40 | 7000   | 21.913806 | 1  | 1 |
| 41 | 20000  | 23.372576 | 3  | 2 |
| 42 | 30000  | 23.148148 | 5  | 2 |
| 43 | 70000  | 20.17264  | 2  | 2 |
| 44 | 6000   | 24.456063 | 12 | 1 |
| 45 | 40000  | 15.755751 | 5  | 1 |
| 46 | 20000  | 24.747454 | 22 | 1 |
| 47 | 10000  | 25.204789 | 6  | 2 |
| 48 | 7000   | 23.738662 | 2  | 1 |
| 49 | 10000  | 25.536704 | 3  | 2 |
| 50 | 8000   | 24.444444 | 2  | 2 |
| 51 | 12000  | 23.805402 | 1  | 1 |

|    |       |           |    |   |
|----|-------|-----------|----|---|
| 1  |       |           |    |   |
| 2  | 60000 | 21.403092 | 3  | 2 |
| 3  | 25000 | 25.536704 | 4  | 2 |
| 4  | 10000 | 28.999307 | 5  | 2 |
| 5  | 15000 | 23.233456 | 15 | 2 |
| 6  | 20000 | 25.636917 | 3  | 2 |
| 7  | 20000 | 26.222222 | 14 | 1 |
| 9  | 7000  | 26.402355 | 3  | 2 |
| 10 | 50000 | 29.048656 | 3  | 1 |
| 11 | 50000 | 29.094282 | 8  | 2 |
| 12 | 10000 | 19.814053 | 1  | 2 |
| 13 | 10000 | 25.07716  | 3  | 2 |
| 15 | 50000 | 24.034407 | 9  | 2 |
| 16 | 3000  | 22.773186 | 1  | 2 |
| 17 | 25000 | 24.910767 | 11 | 2 |
| 18 | 5000  | 25.636917 | 4  | 2 |
| 20 | 30000 | 27.776706 | 1  | 2 |
| 21 | 30000 | 20.415225 | 20 | 1 |
| 22 | 15000 | 26.709402 | 6  | 2 |
| 23 | 10000 | 18.131219 | 4  | 1 |
| 24 | 6000  | 21.778435 | 2  | 1 |
| 25 | 10000 | 22.862534 | 25 | 1 |
| 26 | 30000 | 22.812934 | 12 | 1 |
| 27 | 5000  | 23.4375   | 11 | 2 |
| 28 | 10000 | 30.757401 | 15 | 1 |
| 29 | 30000 | 24.6755   | 7  | 2 |
| 30 | 20000 | 18.090339 | 5  | 2 |
| 31 | 10000 | 26.402355 | 7  | 2 |
| 32 | 20000 | 20.342798 | 3  | 2 |
| 33 | 15000 | 32.454717 | 1  | 2 |
| 34 | 7000  | 28.763971 | 8  | 2 |
| 35 | 40000 | 25.333333 | 6  | 1 |
| 36 | 25000 | 28        | 5  | 1 |
| 37 | 20000 | 48.65917  | 9  | 2 |
| 38 | 10000 | 24.577867 | 3  | 2 |
| 39 | 15000 | 22.665895 | 11 | 2 |
| 40 | 15000 | 26.666667 | 6  | 2 |
| 41 | 3000  | 22.071078 | 10 | 2 |
| 42 | 15000 | 28.888889 | 20 | 1 |
| 43 | 7000  | 28.133657 | 1  | 2 |
| 44 | 7000  | 24.112654 | 1  | 1 |
| 45 | 5000  | 29.864958 | 4  | 2 |
| 46 | 10000 | 23.612751 | 2  | 2 |
| 47 | 5000  | 19.692665 | 12 | 1 |
| 48 | 60000 | 23.781213 | 4  | 2 |
| 49 | 10000 | 22.518296 | 20 | 2 |
| 50 | 3000  | 23.738662 | 8  | 1 |
| 51 | 30000 | 22.600263 | 17 | 1 |
| 52 | 4000  | 24.776795 | 10 | 2 |
| 53 | 5000  | 30.700408 | 1  | 1 |
| 54 | 15000 | 31.202564 | 7  | 2 |

|    |       |           |    |   |
|----|-------|-----------|----|---|
| 1  |       |           |    |   |
| 2  | 15000 | 48.072562 | 1  | 2 |
| 3  | 2000  | 22.812934 | 1  | 2 |
| 4  | 10000 | 23.725286 | 2  | 1 |
| 5  | 10000 | 17.777778 | 12 | 1 |
| 6  | 20000 | 18.256319 | 1  | 2 |
| 7  | 3000  | 17.843364 | 7  | 2 |
| 8  | 30000 | 20.613131 | 3  | 2 |
| 9  | 3000  | 25.536704 | 1  | 1 |
| 10 | 5000  | 26.953125 | 1  | 1 |
| 11 | 10000 | 20        | 6  | 2 |
| 12 | 80000 | 29.899691 | 1  | 2 |
| 13 | 5000  | 29.094282 | 2  | 2 |
| 14 | 10000 | 20.775623 | 1  | 2 |
| 15 | 5000  | 27.434842 | 1  | 2 |
| 16 | 15000 | 16.46436  | 12 | 1 |
| 17 | 15000 | 21.082813 | 5  | 2 |
| 18 | 5000  | 31.644286 | 12 | 2 |
| 19 | 10000 | 35.142734 | 4  | 2 |
| 20 | 20000 | 19.53125  | 1  | 1 |
| 21 | 4000  | 27.830288 | 7  | 2 |
| 22 | 12000 | 16.444444 | 5  | 2 |
| 23 | 15000 | 22.582709 | 2  | 2 |
| 24 | 5000  | 21.641274 | 1  | 1 |
| 25 | 10000 | 24.973985 | 8  | 2 |
| 26 | 8000  | 20.077748 | 2  | 1 |
| 27 | 15000 | 27.407657 | 2  | 2 |
| 28 | 10000 | 27.209608 | 4  | 2 |
| 29 | 3000  | 19.555556 | 1  | 2 |
| 30 | 30000 | 26.142688 | 3  | 2 |
| 31 | 15000 | 32.439446 | 2  | 2 |
| 32 | 3000  | 26.370238 | 3  | 2 |
| 33 | 30000 | 20.888889 | 12 | 1 |
| 34 | 8000  | 27.268006 | 1  | 2 |
| 35 | 20000 | 19.17458  | 1  | 2 |
| 36 | 10000 | 23.422091 | 2  | 1 |
| 37 | 7000  | 26.838648 | 19 | 2 |
| 38 | 6000  | 23.634033 | 12 | 2 |
| 39 | 6000  | 19.562955 | 1  | 2 |
| 40 | 60000 | 29.777778 | 10 | 1 |
| 41 | 30000 | 21.219136 | 3  | 1 |
| 42 | 10000 | 15.822159 | 1  | 2 |
| 43 | 5000  | 27.434842 | 4  | 2 |
| 44 | 20000 | 30.769231 | 7  | 1 |
| 45 | 11500 | 24.21875  | 1  | 1 |
| 46 | 10000 | 25.390625 | 6  | 2 |
| 47 | 10000 | 21.821067 | 7  | 2 |
| 48 | 6000  | 23.233456 | 7  | 2 |
| 49 | 50000 | 33.777444 | 2  | 2 |
| 50 | 40000 | 27.040816 | 4  | 2 |
| 51 | 20000 | 29.154519 | 20 | 2 |

|    |       |           |   |   |
|----|-------|-----------|---|---|
| 1  |       |           |   |   |
| 2  | 10000 | 24.87772  | 5 | 2 |
| 3  | 2500  | 32.046146 | 2 | 2 |
| 4  |       |           |   |   |
| 5  |       |           |   |   |
| 6  |       |           |   |   |
| 7  |       |           |   |   |
| 8  |       |           |   |   |
| 9  |       |           |   |   |
| 10 |       |           |   |   |
| 11 |       |           |   |   |
| 12 |       |           |   |   |
| 13 |       |           |   |   |
| 14 |       |           |   |   |
| 15 |       |           |   |   |
| 16 |       |           |   |   |
| 17 |       |           |   |   |
| 18 |       |           |   |   |
| 19 |       |           |   |   |
| 20 |       |           |   |   |
| 21 |       |           |   |   |
| 22 |       |           |   |   |
| 23 |       |           |   |   |
| 24 |       |           |   |   |
| 25 |       |           |   |   |
| 26 |       |           |   |   |
| 27 |       |           |   |   |
| 28 |       |           |   |   |
| 29 |       |           |   |   |
| 30 |       |           |   |   |
| 31 |       |           |   |   |
| 32 |       |           |   |   |
| 33 |       |           |   |   |
| 34 |       |           |   |   |
| 35 |       |           |   |   |
| 36 |       |           |   |   |
| 37 |       |           |   |   |
| 38 |       |           |   |   |
| 39 |       |           |   |   |
| 40 |       |           |   |   |
| 41 |       |           |   |   |
| 42 |       |           |   |   |
| 43 |       |           |   |   |
| 44 |       |           |   |   |
| 45 |       |           |   |   |
| 46 |       |           |   |   |
| 47 |       |           |   |   |
| 48 |       |           |   |   |
| 49 |       |           |   |   |
| 50 |       |           |   |   |
| 51 |       |           |   |   |
| 52 |       |           |   |   |
| 53 |       |           |   |   |
| 54 |       |           |   |   |
| 55 |       |           |   |   |
| 56 |       |           |   |   |
| 57 |       |           |   |   |
| 58 |       |           |   |   |
| 59 |       |           |   |   |
| 60 |       |           |   |   |

For peer review only

|    | Q20_FBG | Q21_RBG | rec_current_smok | Q26_current_SLT |
|----|---------|---------|------------------|-----------------|
| 1  |         |         |                  |                 |
| 2  |         |         |                  |                 |
| 3  |         |         |                  |                 |
| 4  | 8.9     | 10.9    | 2                | 2               |
| 5  | 7.2     | 11.5    | 2                | 2               |
| 6  | 6.4     | 10.5    | 2                | 2               |
| 7  | 6.4     | 10.5    | 2                | 2               |
| 8  | 9       | 12      | 2                | 2               |
| 9  | 9.8     | 13.5    | 2                | 1               |
| 10 | 6.4     | 9.1     | 2                | 2               |
| 11 | 5.5     | 8.4     | 2                | 2               |
| 12 | 5.7     | 7.8     | 2                | 2               |
| 13 | 5.7     | 7.8     | 2                | 2               |
| 14 | 5.2     | 6.6     | 2                | 1               |
| 15 | 7.7     | 12      | 2                | 1               |
| 16 | 6.6     | 8.9     | 2                | 1               |
| 17 | 6.2     | 11.2    | 2                | 1               |
| 18 | 5.5     | 7.8     | 2                | 2               |
| 19 | 5.5     | 7.8     | 2                | 2               |
| 20 | 6.5     | 8.4     | 2                | 2               |
| 21 | 7.9     | 8.9     | 2                | 2               |
| 22 | 6.3     | 11.5    | 2                | 2               |
| 23 | 6.9     | 9.5     | 2                | 2               |
| 24 | 6.9     | 9.5     | 2                | 2               |
| 25 | 3.2     | 11.5    | 2                | 2               |
| 26 | 5.8     | 7.2     | 2                | 2               |
| 27 | 5.3     | 7.6     | 2                | 1               |
| 28 | 7.1     | 14.7    | 2                | 1               |
| 29 | 9.7     | 16.9    | 2                | 2               |
| 30 | 9.7     | 16.9    | 2                | 2               |
| 31 | 5.2     | 9.9     | 1                | 2               |
| 32 | 9.1     | 11.3    | 2                | 2               |
| 33 | 8.5     | 13.6    | 2                | 2               |
| 34 | 4.5     | 12.5    | 2                | 2               |
| 35 | 5.2     | 9.7     | 1                | 1               |
| 36 | 5.2     | 9.7     | 1                | 1               |
| 37 | 6       | 10.2    | 2                | 2               |
| 38 | 7       | 12.7    | 2                | 2               |
| 39 | 5.3     | 6.4     | 1                | 1               |
| 40 | 4.1     | 7.2     | 2                | 2               |
| 41 | 4.1     | 7.2     | 2                | 2               |
| 42 | 6.6     | 8.6     | 1                | 2               |
| 43 | 10      | 18      | 2                | 2               |
| 44 | 17.9    | 14.2    | 2                | 2               |
| 45 | 10      | 15      | 1                | 2               |
| 46 | 6.8     | 13.2    | 2                | 2               |
| 47 | 6.8     | 13.2    | 2                | 2               |
| 48 | 6       | 7.5     | 2                | 2               |
| 49 | 4.1     | 7.2     | 2                | 2               |
| 50 | 5.9     | 12.5    | 1                | 1               |
| 51 | 6.6     | 9.9     | 2                | 1               |
| 52 | 6.6     | 9.9     | 2                | 1               |
| 53 | 6.9     | 10.7    | 2                | 2               |
| 54 | 5.8     | 7.2     | 2                | 2               |
| 55 | 6.2     | 8.1     | 2                | 1               |
| 56 | 4.2     | 9.6     | 1                | 2               |
| 57 | 5.9     | 7.7     | 1                | 2               |
| 58 | 5.9     | 7.7     | 1                | 2               |
| 59 | 5       | 8.9     | 2                | 1               |
| 60 | 5.9     | 11.1    | 2                | 2               |
|    | 8.8     | 16      | 1                | 1               |



|    |       |      |   |   |
|----|-------|------|---|---|
| 1  |       |      |   |   |
| 2  | 5.2   | 6.9  | 2 | 1 |
| 3  | 6.9   | 8.6  | 2 | 2 |
| 4  | 6.8   | 11.2 | 2 | 2 |
| 5  | 7     | 8.5  | 2 | 2 |
| 6  | 6.8   | 8.9  | 2 | 2 |
| 7  | 6.7   | 11.9 | 2 | 2 |
| 8  | 6.7   | 11.9 | 2 | 2 |
| 9  | 6.911 | 11.1 | 2 | 2 |
| 10 | 7.2   | 8.3  | 2 | 2 |
| 11 | 6.2   | 7.2  | 2 | 2 |
| 12 | 9     | 13   | 2 | 2 |
| 13 | 9     | 13   | 2 | 2 |
| 14 | 6.7   | 13   | 2 | 2 |
| 15 | 6     | 10.5 | 2 | 2 |
| 16 | 5.9   | 10.2 | 2 | 2 |
| 17 | 5.1   | 8.2  | 2 | 2 |
| 18 | 6.4   | 13.9 | 1 | 2 |
| 19 | 5.7   | 9.8  | 2 | 1 |
| 20 | 5.7   | 9.8  | 2 | 1 |
| 21 | 6     | 11   | 1 | 1 |
| 22 | 5.8   | 9.9  | 2 | 2 |
| 23 | 9.3   | 9.9  | 2 | 2 |
| 24 | 9.3   | 9.9  | 2 | 2 |
| 25 | 6.7   | 10.3 | 2 | 1 |
| 26 | 8.2   | 11.5 | 2 | 1 |
| 27 | 6.4   | 8.4  | 1 | 2 |
| 28 | 6.8   | 11   | 2 | 1 |
| 29 | 5.2   | 8    | 2 | 2 |
| 30 | 5.2   | 8    | 2 | 2 |
| 31 | 8.1   | 12   | 2 | 2 |
| 32 | 4.9   | 6.2  | 2 | 2 |
| 33 | 5.8   | 8    | 2 | 1 |
| 34 | 7.2   | 11.2 | 2 | 2 |
| 35 | 8.8   | 14.4 | 2 | 1 |
| 36 | 8.8   | 14.4 | 2 | 1 |
| 37 | 5.3   | 7.2  | 2 | 2 |
| 38 | 6.5   | 10.8 | 2 | 2 |
| 39 | 7.4   | 8.4  | 2 | 2 |
| 40 | 6.4   | 7.8  | 2 | 1 |
| 41 | 6.2   | 7.5  | 2 | 2 |
| 42 | 6.2   | 7.5  | 2 | 2 |
| 43 | 7.4   | 13.5 | 2 | 2 |
| 44 | 6.7   | 7.4  | 2 | 2 |
| 45 | 6.9   | 9.2  | 2 | 2 |
| 46 | 7     | 10.8 | 2 | 2 |
| 47 | 7     | 10.8 | 2 | 2 |
| 48 | 7.2   | 10.7 | 2 | 2 |
| 49 | 6.6   | 8.1  | 2 | 1 |
| 50 | 6.8   | 12.1 | 2 | 2 |
| 51 | 5.1   | 6.1  | 2 | 2 |
| 52 | 6.6   | 7.6  | 2 | 2 |
| 53 | 6.6   | 7.6  | 2 | 2 |
| 54 | 6.1   | 11.6 | 2 | 2 |
| 55 | 6     | 10.4 | 2 | 2 |
| 56 | 8.3   | 10.8 | 2 | 2 |
| 57 | 6.4   | 8.8  | 2 | 2 |
| 58 | 7.2   | 13.7 | 2 | 1 |
| 59 | 7.2   | 11.9 | 2 | 2 |
| 60 | 7.2   | 11.9 | 2 | 2 |
|    | 7.9   | 13   | 2 | 2 |

|    |      |      |   |   |
|----|------|------|---|---|
| 1  |      |      |   |   |
| 2  | 8.1  | 10.1 | 2 | 2 |
| 3  | 9.2  | 11   | 2 | 2 |
| 4  | 11.6 | 14.2 | 2 | 2 |
| 5  | 6.2  | 7.9  | 2 | 2 |
| 6  | 4.3  | 4.9  | 2 | 1 |
| 7  | 6    | 10   | 2 | 2 |
| 8  | 11   | 13   | 2 | 1 |
| 9  | 8    | 9    | 2 | 2 |
| 10 | 7    | 10   | 2 | 2 |
| 11 | 8    | 9    | 2 | 2 |
| 12 | 9    | 14   | 2 | 2 |
| 13 | 5    | 9    | 2 | 2 |
| 14 | 4    | 7    | 2 | 2 |
| 15 | 7    | 9    | 2 | 1 |
| 16 | 6.5  | 7    | 2 | 2 |
| 17 | 8    | 10   | 2 | 2 |
| 18 | 7    | 13   | 2 | 1 |
| 19 | 6    | 9    | 2 | 1 |
| 20 | 7    | 14   | 2 | 2 |
| 21 | 7    | 12   | 2 | 2 |
| 22 | 7    | 9    | 2 | 1 |
| 23 | 7    | 10   | 2 | 2 |
| 24 | 6    | 8    | 2 | 1 |
| 25 | 8    | 4    | 2 | 2 |
| 26 | 7    | 6    | 2 | 2 |
| 27 | 8    | 11   | 2 | 2 |
| 28 | 7    | 10   | 2 | 1 |
| 29 | 6    | 8    | 2 | 2 |
| 30 | 6    | 14   | 2 | 2 |
| 31 | 13   | 17   | 2 | 2 |
| 32 | 11   | 16   | 2 | 1 |
| 33 | 4    | 7    | 2 | 2 |
| 34 | 10   | 17   | 2 | 2 |
| 35 | 8    | 11   | 2 | 1 |
| 36 | 5    | 7    | 2 | 2 |
| 37 | 6    | 14   | 2 | 2 |
| 38 | 12   | 14   | 2 | 2 |
| 39 | 8    | 11   | 2 | 2 |
| 40 | 9    | 10   | 2 | 2 |
| 41 | 7    | 10   | 2 | 2 |
| 42 | 8    | 11   | 2 | 1 |
| 43 | 9    | 12   | 2 | 2 |
| 44 | 13   | 18   | 2 | 2 |
| 45 | 7    | 9    | 2 | 2 |
| 46 | 4    | 14   | 2 | 2 |
| 47 | 7    | 9    | 2 | 2 |
| 48 | 10   | 11   | 2 | 2 |
| 49 | 6    | 9    | 2 | 2 |
| 50 | 5    | 6    | 2 | 2 |
| 51 | 9    | 10   | 2 | 2 |

|    |     |     |   |   |
|----|-----|-----|---|---|
| 1  |     |     |   |   |
| 2  | 9   | 11  | 2 | 2 |
| 3  | 10  | 12  | 2 | 2 |
| 4  | 6.4 | 7.2 | 2 | 2 |
| 5  | 6   | 10  | 2 | 2 |
| 6  | 9   | 10  | 2 | 2 |
| 7  | 11  | 12  | 2 | 2 |
| 8  | 9   | 16  | 2 | 2 |
| 9  | 7   | 11  | 2 | 2 |
| 10 | 14  | 24  | 2 | 2 |
| 11 | 6   | 8   | 2 | 1 |
| 12 | 7   | 13  | 2 | 1 |
| 13 | 7   | 11  | 2 | 2 |
| 14 | 5   | 6   | 2 | 2 |
| 15 | 14  | 19  | 2 | 2 |
| 16 | 5   | 9   | 2 | 2 |
| 17 | 8   | 11  | 2 | 1 |
| 18 | 13  | 17  | 2 | 1 |
| 19 | 11  | 14  | 2 | 1 |
| 20 | 6   | 8   | 2 | 1 |
| 21 | 6   | 10  | 2 | 2 |
| 22 | 11  | 13  | 2 | 1 |
| 23 | 12  | 13  | 2 | 1 |
| 24 | 6   | 11  | 2 | 2 |
| 25 | 14  | 22  | 2 | 2 |
| 26 | 7   | 12  | 2 | 2 |
| 27 | 3   | 12  | 2 | 2 |
| 28 | 7   | 8   | 2 | 2 |
| 29 | 6   | 7   | 2 | 2 |
| 30 | 9   | 16  | 2 | 2 |
| 31 | 8   | 12  | 2 | 2 |
| 32 | 5   | 6   | 2 | 2 |
| 33 | 9   | 14  | 2 | 2 |
| 34 | 14  | 16  | 2 | 1 |
| 35 | 8   | 9   | 2 | 2 |
| 36 | 6   | 7   | 2 | 2 |
| 37 | 7   | 9   | 2 | 2 |
| 38 | 8   | 18  | 2 | 2 |
| 39 | 8   | 10  | 2 | 2 |
| 40 | 9   | 11  | 2 | 2 |
| 41 | 6   | 8   | 2 | 2 |
| 42 | 20  | 22  | 2 | 2 |
| 43 | 10  | 12  | 2 | 2 |
| 44 | 10  | 11  | 2 | 1 |
| 45 | 6   | 16  | 2 | 2 |
| 46 | 7   | 10  | 2 | 2 |
| 47 | 8   | 12  | 2 | 2 |
| 48 | 8   | 11  | 2 | 2 |
| 49 | 9   | 8   | 2 | 2 |
| 50 | 6   | 22  | 2 | 2 |
| 51 | 10  | 12  | 2 | 2 |
| 52 | 10  | 11  | 2 | 1 |
| 53 | 6   | 16  | 2 | 2 |
| 54 | 7   | 10  | 2 | 2 |
| 55 | 8   | 12  | 2 | 2 |
| 56 | 6   | 11  | 2 | 2 |
| 57 | 5   | 9   | 2 | 2 |
| 58 | 8   | 10  | 2 | 1 |
| 59 | 7   | 8   | 2 | 2 |
| 60 |     |     |   |   |

|    |      |      |   |   |
|----|------|------|---|---|
| 1  |      |      |   |   |
| 2  | 5    | 8    | 2 | 2 |
| 3  | 9    | 12   | 2 | 2 |
| 4  | 17.4 | 8.4  | 2 | 1 |
| 5  | 11.8 | 14.5 | 2 | 2 |
| 6  | 5.6  | 13   | 2 | 2 |
| 7  | 7.9  | 9.1  | 2 | 2 |
| 8  | 9.4  | 12.5 | 2 | 2 |
| 9  | 9    | 11.2 | 2 | 2 |
| 10 | 8.7  | 13.3 | 2 | 2 |
| 11 | 10   | 15   | 2 | 1 |
| 12 | 13.3 | 24   | 2 | 2 |
| 13 | 7.6  | 9    | 2 | 2 |
| 14 | 6    | 8    | 2 | 2 |
| 15 | 5    | 7    | 2 | 2 |
| 16 | 6    | 8    | 2 | 2 |
| 17 | 6    | 10   | 2 | 2 |
| 18 | 4    | 9    | 2 | 2 |
| 19 | 9.5  | 17   | 2 | 2 |
| 20 | 7    | 4    | 2 | 2 |
| 21 | 6    | 11   | 2 | 2 |
| 22 | 14   | 22   | 2 | 2 |
| 23 | 11   | 14   | 2 | 2 |
| 24 | 6    | 7    | 2 | 2 |
| 25 | 6    | 8    | 2 | 2 |
| 26 | 17   | 30   | 2 | 2 |
| 27 | 6    | 17   | 2 | 2 |
| 28 | 8    | 16   | 2 | 2 |
| 29 | 8    | 14   | 2 | 2 |
| 30 | 7    | 16   | 2 | 2 |
| 31 | 6    | 19.9 | 1 | 2 |
| 32 | 8    | 14   | 2 | 2 |
| 33 | 6    | 10   | 1 | 2 |
| 34 | 5    | 9    | 2 | 2 |
| 35 | 9    | 14   | 1 | 2 |
| 36 | 12   | 19   | 1 | 2 |
| 37 | 5    | 9    | 2 | 2 |
| 38 | 7    | 9    | 2 | 2 |
| 39 | 7    | 10   | 2 | 2 |
| 40 | 8    | 8    | 2 | 2 |
| 41 | 9    | 12   | 2 | 2 |
| 42 | 5    | 6    | 2 | 2 |
| 43 | 6    | 13   | 1 | 1 |
| 44 | 9    | 14   | 2 | 2 |
| 45 | 6    | 7    | 2 | 2 |
| 46 | 12   | 18   | 1 | 1 |
| 47 | 7    | 9    | 2 | 2 |
| 48 | 8    | 12   | 2 | 2 |
| 49 | 14   | 21   | 1 | 2 |
| 50 | 13   | 17   | 2 | 1 |
| 51 | 7    | 10   | 2 | 2 |

|    |      |      |   |   |
|----|------|------|---|---|
| 1  |      |      |   |   |
| 2  | 8.7  | 13.3 | 2 | 2 |
| 3  | 10   | 15   | 2 | 1 |
| 4  | 13.3 | 24   | 2 | 2 |
| 5  | 7.6  | 9    | 2 | 2 |
| 6  | 6    | 8    | 2 | 2 |
| 7  | 5    | 7    | 2 | 2 |
| 8  | 6    | 8    | 2 | 2 |
| 9  | 6    | 10   | 2 | 2 |
| 10 | 4    | 8    | 2 | 2 |
| 11 | 9.5  | 17   | 2 | 2 |
| 12 | 7    | 9    | 2 | 2 |
| 13 | 10   | 15   | 2 | 1 |
| 14 | 13.3 | 24   | 2 | 2 |
| 15 | 7.6  | 9    | 2 | 2 |
| 16 | 6    | 8    | 2 | 2 |
| 17 | 5    | 7    | 2 | 2 |
| 18 | 6    | 8    | 2 | 2 |
| 19 | 6    | 10   | 2 | 2 |
| 20 | 4    | 5    | 2 | 2 |
| 21 | 9.5  | 17   | 2 | 2 |
| 22 | 7    | 4    | 2 | 2 |
| 23 | 6    | 11   | 2 | 2 |
| 24 | 10   | 18   | 2 | 1 |
| 25 | 11   | 13   | 2 | 2 |
| 26 | 9    | 13   | 2 | 2 |
| 27 | 15   | 18   | 2 | 1 |
| 28 | 10   | 11   | 2 | 1 |
| 29 | 9    | 13   | 2 | 1 |
| 30 | 10   | 18   | 2 | 1 |
| 31 | 7    | 13   | 2 | 2 |
| 32 | 9    | 13   | 2 | 2 |
| 33 | 6    | 16   | 2 | 1 |
| 34 | 4    | 10   | 2 | 2 |
| 35 | 9    | 13   | 2 | 1 |
| 36 | 10   | 18   | 2 | 1 |
| 37 | 7    | 13   | 2 | 2 |
| 38 | 9    | 13   | 2 | 2 |
| 39 | 6    | 16   | 2 | 1 |
| 40 | 4    | 10   | 2 | 2 |
| 41 | 9    | 13   | 2 | 1 |
| 42 | 10   | 18   | 2 | 1 |
| 43 | 5    | 7    | 2 | 2 |
| 44 | 7    | 12   | 2 | 2 |
| 45 | 15   | 18   | 2 | 1 |
| 46 | 10   | 11   | 2 | 1 |
| 47 | 17.4 | 8.4  | 2 | 1 |
| 48 | 11.8 | 14.5 | 2 | 2 |
| 49 | 5.6  | 13   | 2 | 2 |
| 50 | 7.9  | 9.1  | 2 | 2 |
| 51 | 9.4  | 12.5 | 2 | 2 |
| 52 | 9    | 11.2 | 2 | 2 |
| 53 | 8.7  | 13.3 | 2 | 2 |
| 54 | 10   | 15   | 2 | 1 |
| 55 | 5    | 9    | 2 | 2 |
| 56 | 7.6  | 9    | 2 | 2 |
| 57 | 6    | 8    | 2 | 2 |

|    |    |    |   |   |
|----|----|----|---|---|
| 1  |    |    |   |   |
| 2  | 5  | 7  | 2 | 2 |
| 3  | 6  | 8  | 2 | 2 |
| 4  | 7  | 14 | 2 | 1 |
| 5  | 7  | 8  | 1 | 2 |
| 6  | 8  | 10 | 2 | 1 |
| 7  | 8  | 16 | 2 | 1 |
| 8  | 7  | 8  | 2 | 1 |
| 9  | 8  | 16 | 2 | 2 |
| 10 | 8  | 10 | 2 | 2 |
| 11 | 8  | 10 | 2 | 2 |
| 12 | 7  | 9  | 2 | 2 |
| 13 | 9  | 19 | 2 | 2 |
| 14 | 7  | 8  | 2 | 2 |
| 15 | 7  | 16 | 2 | 1 |
| 16 | 6  | 10 | 2 | 2 |
| 17 | 8  | 13 | 2 | 2 |
| 18 | 6  | 11 | 2 | 2 |
| 19 | 7  | 11 | 2 | 2 |
| 20 | 14 | 17 | 2 | 2 |
| 21 | 10 | 14 | 2 | 1 |
| 22 | 11 | 16 | 2 | 2 |
| 23 | 9  | 11 | 2 | 2 |
| 24 | 6  | 9  | 2 | 1 |
| 25 | 9  | 11 | 2 | 2 |
| 26 | 11 | 17 | 2 | 2 |
| 27 | 7  | 11 | 2 | 2 |
| 28 | 5  | 9  | 2 | 2 |
| 29 | 13 | 23 | 2 | 2 |
| 30 | 8  | 14 | 2 | 1 |
| 31 | 7  | 11 | 2 | 2 |
| 32 | 7  | 16 | 2 | 2 |
| 33 | 6  | 12 | 1 | 2 |
| 34 | 7  | 14 | 2 | 1 |
| 35 | 7  | 8  | 1 | 2 |
| 36 | 7  | 12 | 1 | 1 |
| 37 | 7  | 8  | 2 | 2 |
| 38 | 4  | 10 | 2 | 2 |
| 39 | 12 | 20 | 2 | 2 |
| 40 | 9  | 10 | 2 | 1 |
| 41 | 9  | 11 | 2 | 2 |
| 42 | 5  | 11 | 2 | 2 |
| 43 | 5  | 10 | 2 | 2 |
| 44 | 6  | 16 | 2 | 1 |
| 45 | 7  | 8  | 2 | 2 |
| 46 | 13 | 15 | 2 | 2 |
| 47 | 11 | 14 | 2 | 2 |
| 48 | 6  | 8  | 2 | 2 |
| 49 | 9  | 11 | 2 | 2 |
| 50 | 6  | 7  | 1 | 1 |
| 51 | 7  | 8  | 2 | 2 |
| 52 | 6  | 8  | 2 | 2 |
| 53 | 9  | 11 | 2 | 2 |
| 54 | 6  | 7  | 1 | 1 |
| 55 | 7  | 8  | 2 | 2 |
| 56 | 6  | 8  | 2 | 2 |
| 57 | 9  | 11 | 2 | 2 |
| 58 | 6  | 7  | 1 | 1 |
| 59 | 7  | 8  | 2 | 2 |
| 60 | 6  | 8  | 1 | 2 |

|    |      |      |   |   |
|----|------|------|---|---|
| 1  |      |      |   |   |
| 2  | 5    | 9    | 2 | 2 |
| 3  | 5    | 9    | 2 | 2 |
| 4  | 5.5  | 8    | 2 | 2 |
| 5  | 13.4 | 20   | 2 | 2 |
| 6  | 8    | 14   | 2 | 2 |
| 7  | 8    | 14   | 2 | 2 |
| 8  | 7    | 11   | 2 | 2 |
| 9  | 6    | 8    | 2 | 2 |
| 10 | 7    | 9    | 2 | 2 |
| 11 | 8    | 12   | 2 | 2 |
| 12 | 5    | 7    | 2 | 2 |
| 13 | 6    | 11   | 2 | 2 |
| 14 | 6    | 11   | 2 | 2 |
| 15 | 8    | 11   | 2 | 2 |
| 16 | 9    | 14   | 2 | 2 |
| 17 | 8    | 11   | 2 | 2 |
| 18 | 5    | 8    | 2 | 2 |
| 19 | 7    | 8    | 2 | 1 |
| 20 | 7    | 8    | 2 | 1 |
| 21 | 8    | 3    | 2 | 2 |
| 22 | 11   | 18   | 2 | 1 |
| 23 | 15   | 20   | 2 | 1 |
| 24 | 15   | 20   | 2 | 1 |
| 25 | 6    | 8    | 2 | 2 |
| 26 | 5    | 7    | 2 | 1 |
| 27 | 14   | 17   | 2 | 2 |
| 28 | 5    | 7.2  | 2 | 2 |
| 29 | 8.1  | 11.3 | 2 | 2 |
| 30 | 8.1  | 11.3 | 2 | 2 |
| 31 | 5    | 7    | 2 | 1 |
| 32 | 7    | 9    | 2 | 2 |
| 33 | 7    | 9    | 2 | 2 |
| 34 | 7    | 9    | 2 | 2 |
| 35 | 5    | 10   | 2 | 2 |
| 36 | 5    | 8    | 2 | 2 |
| 37 | 6    | 13   | 2 | 2 |
| 38 | 5    | 8    | 2 | 2 |
| 39 | 9    | 12   | 2 | 2 |
| 40 | 8    | 10   | 2 | 1 |
| 41 | 8    | 10   | 2 | 1 |
| 42 | 15   | 20   | 2 | 1 |
| 43 | 8    | 10   | 2 | 2 |
| 44 | 6    | 8    | 2 | 2 |
| 45 | 8    | 11   | 2 | 2 |
| 46 | 11   | 20   | 2 | 2 |
| 47 | 11   | 20   | 2 | 2 |
| 48 | 9    | 11   | 2 | 2 |
| 49 | 8    | 10   | 2 | 1 |
| 50 | 6    | 9    | 2 | 2 |
| 51 | 14   | 15   | 2 | 2 |
| 52 | 11   | 12   | 2 | 1 |
| 53 | 11   | 12   | 2 | 1 |
| 54 | 6    | 8    | 1 | 2 |
| 55 | 5    | 9    | 2 | 2 |
| 56 | 6    | 7    | 2 | 2 |
| 57 | 6    | 10   | 2 | 2 |
| 58 | 6    | 10   | 2 | 2 |
| 59 | 4    | 8    | 1 | 2 |
| 60 | 7    | 10   | 1 | 1 |
|    | 9    | 13   | 2 | 2 |

|    |     |      |   |   |
|----|-----|------|---|---|
| 1  |     |      |   |   |
| 2  | 6   | 7    | 2 | 2 |
| 3  | 6   | 8    | 2 | 2 |
| 4  | 6.7 | 18   | 1 | 2 |
| 5  | 6.1 | 4.7  | 2 | 1 |
| 6  | 5.5 | 9.8  | 2 | 2 |
| 7  | 5.7 | 7.3  | 2 | 2 |
| 8  | 7.4 | 12.1 | 2 | 2 |
| 9  | 6.1 | 4.7  | 1 | 2 |
| 10 | 9.7 | 15.5 | 2 | 2 |
| 11 | 6.7 | 4.7  | 2 | 2 |
| 12 | 5.6 | 9    | 2 | 2 |
| 13 | 8   | 6    | 2 | 2 |
| 14 | 8   | 12.3 | 2 | 2 |
| 15 | 8   | 14   | 2 | 2 |
| 16 | 8.2 | 7    | 2 | 2 |
| 17 | 4   | 7    | 2 | 2 |
| 18 | 7   | 8    | 2 | 2 |
| 19 | 12  | 10   | 2 | 2 |
| 20 | 7   | 6    | 2 | 2 |
| 21 | 7   | 9    | 2 | 2 |
| 22 | 11  | 13   | 2 | 2 |
| 23 | 8   | 11   | 2 | 2 |
| 24 | 8   | 7    | 2 | 2 |
| 25 | 6   | 11   | 2 | 2 |
| 26 | 6   | 11.5 | 1 | 2 |
| 27 | 11  | 7.3  | 2 | 2 |
| 28 | 11  | 12   | 2 | 2 |
| 29 | 5   | 8    | 2 | 2 |
| 30 | 8   | 11.4 | 2 | 2 |
| 31 | 8   | 12   | 2 | 2 |
| 32 | 9   | 15   | 2 | 2 |
| 33 | 5   | 18   | 2 | 2 |
| 34 | 10  | 13   | 2 | 2 |
| 35 | 5   | 7    | 2 | 1 |
| 36 | 10  | 12   | 2 | 2 |
| 37 | 7   | 18   | 1 | 2 |
| 38 | 6   | 10   | 2 | 2 |
| 39 | 7   | 10   | 2 | 2 |
| 40 | 9   | 11   | 2 | 2 |
| 41 | 5   | 9    | 2 | 2 |
| 42 | 8   | 11   | 2 | 1 |
| 43 | 7   | 12   | 1 | 2 |
| 44 | 6   | 12   | 2 | 2 |
| 45 | 7   | 9    | 2 | 2 |
| 46 | 12  | 11   | 1 | 2 |
| 47 | 12  | 15   | 2 | 2 |
| 48 | 9   | 20   | 2 | 2 |
| 49 | 6   | 9    | 1 | 1 |
| 50 | 6   | 9    | 2 | 2 |
| 51 | 10  | 14   | 2 | 2 |



|    |    |     |   |   |
|----|----|-----|---|---|
| 1  |    |     |   |   |
| 2  | 9  | 10  | 2 | 2 |
| 3  | 6  | 9   | 2 | 2 |
| 4  | 6  | 7   | 2 | 1 |
| 5  | 13 | 15  | 2 | 1 |
| 6  | 5  | 7   | 2 | 2 |
| 7  | 5  | 9   | 2 | 1 |
| 8  | 8  | 12  | 2 | 2 |
| 9  | 5  | 7   | 2 | 1 |
| 10 | 11 | 14  | 2 | 1 |
| 11 | 7  | 9   | 2 | 2 |
| 12 | 13 | 15  | 2 | 2 |
| 13 | 13 | 14  | 2 | 2 |
| 14 | 7  | 8   | 2 | 2 |
| 15 | 7  | 8   | 2 | 2 |
| 16 | 6  | 7   | 2 | 2 |
| 17 | 12 | 11  | 2 | 1 |
| 18 | 7  | 9   | 2 | 2 |
| 19 | 11 | 12  | 2 | 2 |
| 20 | 15 | 18  | 2 | 1 |
| 21 | 8  | 11  | 2 | 1 |
| 22 | 6  | 8   | 2 | 2 |
| 23 | 9  | 11  | 2 | 2 |
| 24 | 8  | 10  | 2 | 2 |
| 25 | 9  | 11  | 2 | 2 |
| 26 | 9  | 11  | 2 | 1 |
| 27 | 12 | 16  | 2 | 1 |
| 28 | 6  | 8   | 2 | 2 |
| 29 | 18 | 20  | 2 | 2 |
| 30 | 7  | 9   | 2 | 2 |
| 31 | 8  | 14  | 2 | 2 |
| 32 | 10 | 20  | 2 | 2 |
| 33 | 5  | 8   | 2 | 2 |
| 34 | 13 | 18  | 2 | 1 |
| 35 | 6  | 12  | 2 | 2 |
| 36 | 6  | 8   | 2 | 2 |
| 37 | 11 | 18  | 2 | 2 |
| 38 | 7  | 9   | 2 | 1 |
| 39 | 8  | 14  | 2 | 2 |
| 40 | 4  | 8   | 2 | 2 |
| 41 | 7  | 9   | 2 | 2 |
| 42 | 6  | 7   | 2 | 2 |
| 43 | 7  | 8   | 2 | 2 |
| 44 | 5  | 9   | 2 | 1 |
| 45 | 7  | 9   | 2 | 2 |
| 46 | 7  | 9   | 2 | 2 |
| 47 | 7  | 9   | 2 | 2 |
| 48 | 7  | 9   | 2 | 1 |
| 49 | 7  | 8   | 2 | 2 |
| 50 | 7  | 9   | 2 | 2 |
| 51 | 7  | 9   | 2 | 2 |
| 52 | 5  | 9   | 2 | 1 |
| 53 | 7  | 9   | 2 | 1 |
| 54 | 7  | 9   | 2 | 2 |
| 55 | 7  | 9   | 2 | 2 |
| 56 | 7  | 9   | 2 | 2 |
| 57 | 7  | 9   | 2 | 1 |
| 58 | 7  | 8   | 2 | 2 |
| 59 | 7  | 8   | 2 | 2 |
| 60 | 11 | 14  | 2 | 1 |
|    | 7  | 6.5 | 2 | 2 |

|    |      |      |   |   |
|----|------|------|---|---|
| 1  |      |      |   |   |
| 2  | 7    | 8    | 2 | 1 |
| 3  | 7    | 9    | 2 | 2 |
| 4  | 8    | 11.1 | 2 | 1 |
| 5  | 6.3  | 9.8  | 2 | 2 |
| 6  |      |      |   |   |
| 7  | 11.8 | 13.1 | 2 | 1 |
| 8  | 9.1  | 11.8 | 2 | 1 |
| 9  | 5.2  | 8.1  | 2 | 1 |
| 10 | 8.5  | 9    | 2 | 1 |
| 11 | 9.2  | 10   | 2 | 2 |
| 12 |      |      |   |   |
| 13 | 5.2  | 7.8  | 2 | 2 |
| 14 | 6    | 7.2  | 2 | 2 |
| 15 | 4.7  | 5.9  | 2 | 2 |
| 16 | 4.7  | 6.8  | 2 | 1 |
| 17 | 6.8  | 9.8  | 2 | 2 |
| 18 |      |      |   |   |
| 19 | 6.5  | 12.1 | 2 | 2 |
| 20 | 12.7 | 17.7 | 2 | 2 |
| 21 | 6.4  | 11.4 | 2 | 2 |
| 22 | 6.8  | 9.1  | 2 | 2 |
| 23 |      |      |   |   |
| 24 | 3.1  | 8.8  | 2 | 2 |
| 25 | 11.6 | 19   | 2 | 2 |
| 26 | 4.2  | 6.3  | 2 | 2 |
| 27 | 6.8  | 9.3  | 2 | 2 |
| 28 |      |      |   |   |
| 29 | 7.9  | 16.3 | 2 | 2 |
| 30 | 15.2 | 22.4 | 2 | 2 |
| 31 | 10.4 | 18.1 | 2 | 1 |
| 32 | 6.1  | 7.9  | 2 | 1 |
| 33 | 6.8  | 10.3 | 2 | 2 |
| 34 | 6.8  | 7.9  | 2 | 2 |
| 35 |      |      |   |   |
| 36 | 6.3  | 8.3  | 2 | 2 |
| 37 | 12.2 | 14.2 | 2 | 1 |
| 38 | 5.4  | 7    | 2 | 2 |
| 39 | 6.4  | 7.7  | 2 | 2 |
| 40 |      |      |   |   |
| 41 | 7.5  | 8.5  | 2 | 2 |
| 42 | 10.8 | 16.1 | 2 | 2 |
| 43 | 5    | 7.3  | 2 | 1 |
| 44 | 16.6 | 18.2 | 2 | 2 |
| 45 | 6    | 12.9 | 2 | 1 |
| 46 |      |      |   |   |
| 47 | 6.2  | 16.2 | 2 | 2 |
| 48 | 10.7 | 13.2 | 2 | 2 |
| 49 | 6.7  | 9.3  | 2 | 1 |
| 50 |      |      |   |   |
| 51 | 11   | 14   | 2 | 2 |
| 52 | 7.2  | 11.2 | 2 | 2 |
| 53 | 5    | 9.2  | 2 | 2 |
| 54 | 6.4  | 9    | 2 | 2 |
| 55 | 5.3  | 8    | 2 | 2 |
| 56 | 5.7  | 8.9  | 2 | 2 |
| 57 |      |      |   |   |
| 58 | 1.2  | 3.6  | 2 | 2 |
| 59 | 9.5  | 11.3 | 2 | 2 |
| 60 | 6    | 8.5  | 2 | 2 |
|    | 9.8  | 12.1 | 2 | 2 |

|    |       |      |   |   |
|----|-------|------|---|---|
| 1  |       |      |   |   |
| 2  | 13.2  | 17.3 | 2 | 2 |
| 3  | 9.6   | 16.8 | 1 | 2 |
| 4  | 5.6   | 8.5  | 2 | 2 |
| 5  | 5     | 10   | 2 | 1 |
| 6  | 4     | 8    | 2 | 2 |
| 7  | 14    | 18   | 2 | 1 |
| 8  | 6     | 8    | 2 | 2 |
| 9  | 5     | 8    | 2 | 2 |
| 10 | 10    | 22   | 2 | 1 |
| 11 | 6.5   | 9    | 2 | 1 |
| 12 | 11    | 13   | 1 | 1 |
| 13 | 11    | 14   | 2 | 2 |
| 14 | 6.6   | 7.4  | 2 | 2 |
| 15 | 8.5   | 11.3 | 2 | 2 |
| 16 | 7     | 10   | 2 | 1 |
| 17 | 6     | 7    | 2 | 2 |
| 18 | 6     | 5    | 2 | 2 |
| 19 | 8     | 9    | 2 | 2 |
| 20 | 4.5   | 8    | 2 | 2 |
| 21 | 14    | 17   | 2 | 2 |
| 22 | 8     | 14   | 2 | 2 |
| 23 | 7     | 11   | 2 | 2 |
| 24 | 10.11 | 18.1 | 2 | 2 |
| 25 | 4     | 8    | 2 | 2 |
| 26 | 8     | 12   | 2 | 2 |
| 27 | 8     | 13   | 2 | 2 |
| 28 | 9     | 6    | 2 | 2 |
| 29 | 4     | 11   | 2 | 1 |
| 30 | 12.6  | 15   | 2 | 2 |
| 31 | 7.5   | 7.6  | 2 | 2 |
| 32 | 5     | 10   | 2 | 2 |
| 33 | 3.5   | 5.1  | 2 | 2 |
| 34 | 4.8   | 16.8 | 2 | 2 |
| 35 | 6.5   | 8.4  | 2 | 2 |
| 36 | 5.4   | 8.9  | 2 | 2 |
| 37 | 6     | 8.4  | 2 | 2 |
| 38 | 8     | 13   | 2 | 2 |
| 39 | 5.7   | 15   | 2 | 2 |
| 40 | 5.1   | 7.4  | 2 | 2 |
| 41 | 8     | 10   | 2 | 2 |
| 42 | 9     | 11   | 2 | 1 |
| 43 | 8     | 11   | 2 | 2 |
| 44 | 6     | 8    | 2 | 2 |
| 45 | 9     | 10   | 2 | 2 |
| 46 | 10    | 13   | 2 | 2 |
| 47 | 9     | 11   | 1 | 2 |
| 48 | 11    | 14   | 2 | 2 |
| 49 | 10    | 13   | 2 | 1 |
| 50 | 8     | 11   | 2 | 2 |
| 51 | 5     | 8    | 2 | 2 |

|    |       |       |   |   |
|----|-------|-------|---|---|
| 1  |       |       |   |   |
| 2  | 9     | 11    | 2 | 2 |
| 3  | 9     | 11    | 1 | 2 |
| 4  | 6     | 11    | 2 | 2 |
| 5  | 5     | 9     | 2 | 2 |
| 6  | 6     | 8     | 2 | 2 |
| 7  | 6     | 8     | 2 | 2 |
| 8  | 10    | 14    | 2 | 1 |
| 9  | 10    | 14    | 2 | 2 |
| 10 | 5     | 6     | 2 | 2 |
| 11 | 8     | 12    | 2 | 2 |
| 12 | 9     | 10    | 2 | 2 |
| 13 | 9     | 10    | 2 | 2 |
| 14 | 12    | 16    | 2 | 2 |
| 15 | 11    | 14    | 2 | 2 |
| 16 | 4     | 7     | 2 | 2 |
| 17 | 6     | 9     | 2 | 1 |
| 18 | 6     | 9     | 2 | 2 |
| 19 | 10    | 13    | 2 | 2 |
| 20 | 5     | 7     | 2 | 2 |
| 21 | 12    | 14    | 2 | 1 |
| 22 | 7     | 10    | 2 | 2 |
| 23 | 7     | 10    | 2 | 2 |
| 24 | 6.3   | 9     | 2 | 2 |
| 25 | 11    | 15.8  | 2 | 2 |
| 26 | 6     | 7     | 2 | 2 |
| 27 | 10    | 9     | 2 | 2 |
| 28 | 5     | 9     | 2 | 2 |
| 29 | 8     | 10    | 2 | 2 |
| 30 | 8     | 10    | 2 | 2 |
| 31 | 6     | 8     | 2 | 2 |
| 32 | 18    | 21    | 2 | 2 |
| 33 | 5     | 7     | 2 | 2 |
| 34 | 25    | 27    | 2 | 2 |
| 35 | 8     | 9     | 2 | 2 |
| 36 | 8     | 9     | 2 | 2 |
| 37 | 7     | 9     | 2 | 2 |
| 38 | 9     | 7     | 2 | 2 |
| 39 | 7     | 12    | 2 | 2 |
| 40 | 6     | 8     | 2 | 2 |
| 41 | 10    | 13    | 2 | 2 |
| 42 | 10    | 13    | 2 | 2 |
| 43 | 5     | 7     | 2 | 2 |
| 44 | 9     | 11    | 2 | 2 |
| 45 | 3     | 13    | 2 | 2 |
| 46 | 6     | 9     | 2 | 2 |
| 47 | 6     | 9     | 2 | 2 |
| 48 | 8     | 17    | 2 | 2 |
| 49 | 13    | 16    | 2 | 2 |
| 50 | 7     | 9     | 2 | 1 |
| 51 | 6     | 9     | 2 | 2 |
| 52 | 6     | 9     | 2 | 2 |
| 53 | 15.6  | 17.83 | 2 | 2 |
| 54 | 15.1  | 17.66 | 2 | 1 |
| 55 | 6.3   | 9.6   | 2 | 2 |
| 56 | 11.9  | 13.4  | 1 | 2 |
| 57 | 18.74 | 21.94 | 2 | 2 |
| 58 | 18.74 | 21.94 | 2 | 2 |
| 59 | 6.9   | 9.3   | 2 | 1 |
| 60 | 6     | 7.8   | 2 | 2 |
|    | 5.05  | 9.55  | 2 | 2 |

|    |      |       |   |   |
|----|------|-------|---|---|
| 1  |      |       |   |   |
| 2  | 13.6 | 25.66 | 2 | 1 |
| 3  | 6.3  | 7.6   | 1 | 1 |
| 4  | 11.6 | 22.2  | 2 | 2 |
| 5  | 8.22 | 15    | 2 | 2 |
| 6  | 8.9  | 11.27 | 2 | 1 |
| 7  | 8.9  | 10.1  | 2 | 2 |
| 8  | 5.3  | 7     | 2 | 2 |
| 9  | 11   | 19    | 2 | 2 |
| 10 | 9    | 14    | 2 | 1 |
| 11 | 6    | 17    | 2 | 2 |
| 12 | 14   | 18    | 2 | 1 |
| 13 | 6    | 9     | 2 | 2 |
| 14 | 15   | 22    | 2 | 2 |
| 15 | 8    | 16    | 2 | 2 |
| 16 | 13   | 21    | 2 | 2 |
| 17 | 11   | 17    | 2 | 1 |
| 18 | 5    | 7     | 2 | 2 |
| 19 | 6    | 9     | 2 | 1 |
| 20 | 17   | 21    | 2 | 1 |
| 21 | 9    | 14    | 2 | 2 |
| 22 | 11   | 22    | 1 | 2 |
| 23 | 6    | 10    | 2 | 2 |
| 24 | 14   | 21    | 2 | 2 |
| 25 | 6    | 8     | 2 | 2 |
| 26 | 8    | 15    | 2 | 2 |
| 27 | 7    | 9     | 1 | 2 |
| 28 | 13   | 16    | 1 | 1 |
| 29 | 9    | 14    | 1 | 2 |
| 30 | 6    | 10    | 2 | 2 |
| 31 | 8    | 9     | 1 | 1 |
| 32 | 16   | 24    | 2 | 2 |
| 33 | 8    | 13    | 2 | 2 |
| 34 | 8    | 15    | 1 | 1 |
| 35 | 6    | 7     | 2 | 1 |
| 36 | 9    | 15    | 1 | 2 |
| 37 | 6    | 7     | 1 | 1 |
| 38 | 6    | 7     | 2 | 1 |
| 39 | 6    | 8     | 2 | 2 |
| 40 | 18   | 20    | 2 | 2 |
| 41 | 19   | 28    | 2 | 2 |
| 42 | 17   | 26    | 1 | 2 |
| 43 | 6    | 8     | 2 | 2 |
| 44 | 14   | 22    | 2 | 2 |
| 45 | 6    | 13    | 2 | 2 |
| 46 | 12   | 17    | 2 | 1 |
| 47 | 5    | 8     | 2 | 2 |
| 48 | 6    | 9     | 2 | 2 |
| 49 | 9    | 14    | 2 | 2 |
| 50 | 7    | 9     | 2 | 2 |
| 51 | 6    | 10    | 2 | 2 |

|    |     |      |   |   |
|----|-----|------|---|---|
| 1  |     |      |   |   |
| 2  | 5   | 8    | 2 | 1 |
| 3  | 9   | 13   | 2 | 1 |
| 4  | 16  | 19   | 2 | 2 |
| 5  | 16  | 19   | 2 | 2 |
| 6  | 12  | 20   | 2 | 2 |
| 7  | 12  | 20   | 2 | 2 |
| 8  | 6   | 8    | 2 | 1 |
| 9  | 5.4 | 8.1  | 2 | 1 |
| 10 | 5.8 | 7.9  | 1 | 2 |
| 11 | 12  | 17   | 2 | 1 |
| 12 | 12  | 17   | 2 | 1 |
| 13 | 6.4 | 8    | 1 | 2 |
| 14 | 7   | 22   | 1 | 1 |
| 15 | 9   | 12   | 2 | 2 |
| 16 | 7   | 10   | 1 | 2 |
| 17 | 7   | 13   | 2 | 2 |
| 18 | 7   | 13   | 2 | 2 |
| 19 | 10  | 17   | 2 | 1 |
| 20 | 6   | 7    | 1 | 1 |
| 21 | 7.9 | 19   | 2 | 2 |
| 22 | 7   | 10   | 2 | 2 |
| 23 | 7   | 9    | 2 | 1 |
| 24 | 7   | 9    | 2 | 1 |
| 25 | 9   | 22   | 2 | 1 |
| 26 | 7   | 9    | 2 | 1 |
| 27 | 9   | 14   | 2 | 2 |
| 28 | 11  | 14   | 2 | 1 |
| 29 | 11  | 14   | 2 | 1 |
| 30 | 8.4 | 9    | 2 | 1 |
| 31 | 9   | 12   | 1 | 2 |
| 32 | 11  | 12   | 2 | 2 |
| 33 | 8   | 12   | 2 | 1 |
| 34 | 8   | 10   | 2 | 1 |
| 35 | 8   | 10   | 2 | 1 |
| 36 | 24  | 11   | 2 | 1 |
| 37 | 7   | 28   | 2 | 1 |
| 38 | 12  | 17   | 1 | 1 |
| 39 | 8   | 9    | 2 | 1 |
| 40 | 8   | 10   | 2 | 2 |
| 41 | 8   | 10   | 2 | 2 |
| 42 | 15  | 24   | 2 | 1 |
| 43 | 15  | 24   | 2 | 1 |
| 44 | 15  | 30   | 2 | 2 |
| 45 | 24  | 28   | 2 | 1 |
| 46 | 6   | 8    | 2 | 2 |
| 47 | 7   | 8    | 2 | 1 |
| 48 | 10  | 16   | 2 | 2 |
| 49 | 13  | 21   | 2 | 1 |
| 50 | 8   | 10   | 2 | 2 |
| 51 | 10  | 14   | 2 | 2 |
| 52 | 10  | 14   | 2 | 2 |
| 53 | 12  | 14   | 2 | 2 |
| 54 | 6   | 13   | 2 | 1 |
| 55 | 10  | 19   | 2 | 1 |
| 56 | 7.3 | 8.14 | 2 | 2 |
| 57 | 11  | 12   | 2 | 2 |
| 58 | 11  | 12   | 2 | 2 |
| 59 | 7   | 9    | 2 | 1 |
| 60 | 7   | 11   | 2 | 1 |
|    | 8   | 9    | 2 | 2 |

|    |      |      |   |   |
|----|------|------|---|---|
| 1  |      |      |   |   |
| 2  | 9    | 11   | 2 | 2 |
| 3  | 10   | 17   | 2 | 1 |
| 4  | 6    | 8    | 2 | 2 |
| 5  | 7    | 10   | 2 | 2 |
| 6  | 6    | 8    | 2 | 2 |
| 7  | 9    | 17   | 2 | 2 |
| 8  | 6    | 24   | 2 | 1 |
| 9  | 6.7  | 8.3  | 2 | 1 |
| 10 | 7.9  | 10.8 | 2 | 2 |
| 11 | 9.8  | 17   | 2 | 2 |
| 12 | 9.7  | 11.5 | 2 | 2 |
| 13 | 6    | 8.5  | 2 | 2 |
| 14 | 8.9  | 14.9 | 2 | 2 |
| 15 | 6.4  | 7.5  | 2 | 2 |
| 16 | 11.6 | 14.6 | 2 | 1 |
| 17 | 13.7 | 14.4 | 2 | 2 |
| 18 | 6.6  | 24   | 2 | 2 |
| 19 | 9.3  | 12.6 | 2 | 1 |
| 20 | 13.7 | 24   | 2 | 1 |
| 21 | 14.8 | 17.9 | 2 | 2 |
| 22 | 3.6  | 8.8  | 2 | 2 |
| 23 | 10.6 | 12.6 | 2 | 2 |
| 24 | 5.2  | 9.2  | 2 | 2 |
| 25 | 9.1  | 20.4 | 2 | 2 |
| 26 | 5    | 7.1  | 2 | 1 |
| 27 | 10.6 | 13.6 | 2 | 2 |
| 28 | 5.4  | 6.4  | 2 | 1 |
| 29 | 19   | 23   | 2 | 1 |
| 30 | 6.4  | 7.8  | 2 | 2 |
| 31 | 6.8  | 7.5  | 2 | 2 |
| 32 | 8.3  | 12.4 | 2 | 1 |
| 33 | 8.3  | 10.4 | 2 | 1 |
| 34 | 5.8  | 8.7  | 2 | 1 |
| 35 | 5.4  | 6    | 2 | 1 |
| 36 | 5.7  | 12.2 | 2 | 1 |
| 37 | 9.5  | 11.5 | 2 | 1 |
| 38 | 4.8  | 6.9  | 2 | 1 |
| 39 | 8.5  | 10.4 | 2 | 1 |
| 40 | 6.7  | 8.8  | 2 | 2 |
| 41 | 5.8  | 15.8 | 2 | 2 |
| 42 | 6.1  | 8.2  | 2 | 2 |
| 43 | 5.4  | 7.4  | 2 | 1 |
| 44 | 7.9  | 9.9  | 2 | 1 |
| 45 | 9.8  | 11.3 | 2 | 2 |
| 46 | 11.2 | 13.2 | 2 | 2 |
| 47 | 6.4  | 9.4  | 2 | 1 |
| 48 | 9.8  | 12.8 | 2 | 1 |
| 49 | 6.1  | 7.4  | 2 | 2 |
| 50 | 7.9  | 17.2 | 2 | 2 |
| 51 | 9.8  | 16.8 | 2 | 2 |

|    |      |      |   |   |
|----|------|------|---|---|
| 1  |      |      |   |   |
| 2  | 6.9  | 10   | 2 | 1 |
| 3  | 5.9  | 6    | 2 | 1 |
| 4  | 9.8  | 14.5 | 2 | 1 |
| 5  | 6.9  | 8.4  | 2 | 2 |
| 6  | 8.7  | 12   | 2 | 2 |
| 7  | 10   | 14.2 | 2 | 2 |
| 8  | 10   | 12   | 2 | 1 |
| 9  | 10.8 | 13.7 | 2 | 2 |
| 10 | 7.2  | 9.7  | 2 | 2 |
| 11 | 16.6 | 20   | 2 | 2 |
| 12 | 6.9  | 8.7  | 2 | 2 |
| 13 | 10.1 | 17.8 | 2 | 1 |
| 14 | 8.8  | 10.5 | 2 | 2 |
| 15 | 6.7  | 8.1  | 2 | 1 |
| 16 | 10.6 | 11.1 | 2 | 2 |
| 17 | 7.3  | 10.2 | 2 | 2 |
| 18 | 8.7  | 10.1 | 2 | 2 |
| 19 | 6.9  | 9.9  | 2 | 1 |
| 20 | 6.3  | 7.3  | 2 | 1 |
| 21 | 6.6  | 19.5 | 2 | 1 |
| 22 | 9.1  | 13.3 | 2 | 2 |
| 23 | 6.9  | 9.7  | 2 | 1 |
| 24 | 6.7  | 9.8  | 2 | 1 |
| 25 | 5.8  | 10.6 | 2 | 2 |
| 26 | 7.2  | 15.2 | 2 | 1 |
| 27 | 13   | 18   | 2 | 1 |
| 28 | 6.9  | 8.9  | 2 | 1 |
| 29 | 5    | 10.3 | 2 | 2 |
| 30 | 8.4  | 10.7 | 2 | 2 |
| 31 | 9.8  | 12.6 | 2 | 1 |
| 32 | 9.6  | 15.1 | 2 | 2 |
| 33 | 6.9  | 7.8  | 2 | 2 |
| 34 | 9.6  | 15   | 2 | 2 |
| 35 | 10.6 | 16.9 | 2 | 1 |
| 36 | 5    | 6.9  | 2 | 1 |
| 37 | 9.6  | 11.5 | 2 | 2 |
| 38 | 6.7  | 9    | 2 | 1 |
| 39 | 8    | 10   | 2 | 1 |
| 40 | 6    | 8.9  | 2 | 2 |
| 41 | 9    | 10   | 2 | 2 |
| 42 | 5.2  | 6    | 2 | 1 |
| 43 | 6.9  | 11.6 | 2 | 1 |
| 44 | 5.2  | 6.4  | 2 | 2 |
| 45 | 8.2  | 11.5 | 2 | 1 |
| 46 | 6.7  | 9.8  | 1 | 1 |
| 47 | 6.3  | 9.3  | 2 | 1 |
| 48 | 5.3  | 11.6 | 2 | 1 |
| 49 | 11.5 | 13.5 | 2 | 1 |
| 50 | 18.4 | 28.6 | 2 | 2 |
| 51 | 9.5  | 10.9 | 1 | 1 |



|    |      |      |   |   |
|----|------|------|---|---|
| 1  |      |      |   |   |
| 2  | 6.5  | 9.5  | 2 | 2 |
| 3  | 6.7  | 9.8  | 2 | 1 |
| 4  | 9.8  | 12.3 | 2 | 1 |
| 5  | 8.7  | 10.3 | 2 | 2 |
| 6  | 7.8  | 11.9 | 2 | 1 |
| 7  | 6.5  | 9.8  | 2 | 2 |
| 8  | 5.5  | 9.8  | 1 | 1 |
| 9  | 6.8  | 12.2 | 2 | 2 |
| 10 | 8.3  | 10.3 | 2 | 2 |
| 11 | 7.6  | 8.7  | 2 | 1 |
| 12 | 16.9 | 19.3 | 2 | 1 |
| 13 | 4.9  | 9.8  | 2 | 1 |
| 14 | 5.8  | 8    | 2 | 1 |
| 15 | 6.8  | 9.7  | 2 | 2 |
| 16 | 8.7  | 10.6 | 2 | 2 |
| 17 | 7.1  | 8.3  | 2 | 1 |
| 18 | 5.2  | 6.3  | 2 | 2 |
| 19 | 5.8  | 6.8  | 1 | 2 |
| 20 | 6.3  | 8.6  | 2 | 2 |
| 21 | 10.5 | 21.6 | 1 | 1 |
| 22 | 6.2  | 8.5  | 2 | 2 |
| 23 | 11.5 | 15   | 2 | 1 |
| 24 | 5.6  | 7.9  | 2 | 1 |
| 25 | 12.2 | 27.3 | 1 | 1 |
| 26 | 8.8  | 14.1 | 2 | 2 |
| 27 | 10.6 | 16   | 2 | 2 |
| 28 | 6.9  | 9    | 2 | 1 |
| 29 | 5.2  | 8.6  | 2 | 2 |
| 30 | 6.2  | 9.4  | 2 | 2 |
| 31 | 6.9  | 8.3  | 2 | 1 |
| 32 | 8.8  | 12.6 | 2 | 2 |
| 33 | 6.3  | 9.2  | 2 | 1 |
| 34 | 6.6  | 9.7  | 2 | 1 |
| 35 | 8.4  | 11.6 | 2 | 2 |
| 36 | 5.8  | 7.4  | 2 | 1 |
| 37 | 6.1  | 7.3  | 2 | 1 |
| 38 | 8.5  | 10.5 | 2 | 1 |
| 39 | 6.8  | 10   | 2 | 2 |
| 40 | 5.8  | 7    | 2 | 2 |
| 41 | 7.1  | 9.8  | 2 | 1 |
| 42 | 14.8 | 24.8 | 2 | 2 |
| 43 | 10.2 | 14.8 | 2 | 1 |
| 44 | 12.6 | 18.6 | 2 | 2 |
| 45 | 6.9  | 9.3  | 2 | 1 |
| 46 | 6.9  | 9.8  | 2 | 1 |
| 47 | 8.8  | 11.6 | 2 | 1 |
| 48 | 8.3  | 10.8 | 2 | 2 |
| 49 | 8.9  | 11.9 | 2 | 1 |
| 50 | 9.8  | 15.5 | 2 | 1 |
| 51 | 6.2  | 10.2 | 2 | 2 |

|    |      |      |   |   |
|----|------|------|---|---|
| 1  |      |      |   |   |
| 2  | 14   | 16   | 2 | 2 |
| 3  | 9    | 16   | 2 | 2 |
| 4  | 5.2  | 7.8  | 2 | 1 |
| 5  | 5.4  | 8.4  | 2 | 1 |
| 6  | 5.2  | 7.8  | 2 | 1 |
| 7  | 5.8  | 9.2  | 2 | 2 |
| 8  | 6.7  | 16.2 | 2 | 2 |
| 9  | 8.7  | 8.2  | 2 | 1 |
| 10 | 9.1  | 8.4  | 2 | 1 |
| 11 | 7.8  | 16.1 | 2 | 2 |
| 12 | 9.2  | 15.6 | 2 | 1 |
| 13 | 6.5  | 9.4  | 2 | 1 |
| 14 | 6.4  | 12.3 | 2 | 2 |
| 15 | 5.6  | 7.3  | 2 | 2 |
| 16 | 4.6  | 7.2  | 2 | 2 |
| 17 | 5.8  | 7.9  | 2 | 2 |
| 18 | 6.4  | 12.3 | 2 | 1 |
| 19 | 5.8  | 9.4  | 2 | 2 |
| 20 | 15.2 | 21.1 | 2 | 2 |
| 21 | 6.8  | 10.3 | 2 | 1 |
| 22 | 5.8  | 9.7  | 2 | 2 |
| 23 | 5.3  | 5.5  | 2 | 1 |
| 24 | 9.8  | 10.2 | 2 | 2 |
| 25 | 7    | 9    | 2 | 2 |
| 26 | 10   | 20.6 | 2 | 2 |
| 27 | 6.9  | 15.6 | 2 | 2 |
| 28 | 5.5  | 9.9  | 2 | 2 |
| 29 | 5.5  | 10.4 | 2 | 2 |
| 30 | 5.5  | 9.9  | 2 | 2 |
| 31 | 2.6  | 4.5  | 2 | 2 |
| 32 | 5.9  | 10.5 | 2 | 1 |
| 33 | 5.5  | 9.9  | 2 | 2 |
| 34 | 2.6  | 4.5  | 2 | 2 |
| 35 | 5.9  | 4.3  | 2 | 2 |
| 36 | 5.5  | 4.2  | 2 | 1 |
| 37 | 2.6  | 18.1 | 2 | 2 |
| 38 | 5.9  | 6.1  | 2 | 1 |
| 39 | 6.6  | 8.7  | 2 | 1 |
| 40 | 6.8  | 12.3 | 2 | 1 |
| 41 | 6.2  | 8    | 2 | 1 |
| 42 | 6.2  | 9.9  | 2 | 2 |
| 43 | 15   | 20   | 2 | 1 |
| 44 | 5.8  | 9.2  | 2 | 1 |
| 45 | 6.2  | 9.4  | 2 | 1 |
| 46 | 6.2  | 9.6  | 2 | 2 |
| 47 | 16.2 | 21.6 | 2 | 2 |
| 48 | 5.8  | 7.2  | 2 | 2 |
| 49 | 6.2  | 8.5  | 2 | 1 |
| 50 | 7    | 11   | 2 | 2 |
| 51 | 7    | 10   | 2 | 2 |

|    |      |      |   |   |
|----|------|------|---|---|
| 1  |      |      |   |   |
| 2  | 6    | 7    | 2 | 2 |
| 3  | 6    | 15   | 2 | 2 |
| 4  | 6    | 9    | 2 | 2 |
| 5  | 6    | 8    | 2 | 2 |
| 6  | 9    | 15   | 2 | 2 |
| 7  | 6    | 18   | 2 | 2 |
| 8  | 12   | 19   | 2 | 2 |
| 9  | 7    | 12   | 2 | 2 |
| 10 | 7    | 4    | 2 | 2 |
| 11 | 6    | 7    | 2 | 1 |
| 12 | 9    | 11   | 2 | 2 |
| 13 | 6    | 5    | 2 | 2 |
| 14 | 5.7  | 13   | 2 | 2 |
| 15 | 11.1 | 21   | 2 | 2 |
| 16 | 8.5  | 12   | 2 | 2 |
| 17 | 8    | 13   | 2 | 2 |
| 18 | 7    | 10   | 2 | 2 |
| 19 | 6    | 7    | 2 | 2 |
| 20 | 6    | 10   | 2 | 2 |
| 21 | 5    | 7    | 2 | 2 |
| 22 | 9    | 11   | 2 | 2 |
| 23 | 3    | 6    | 2 | 2 |
| 24 | 10   | 13   | 2 | 1 |
| 25 | 7    | 12   | 2 | 2 |
| 26 | 15   | 19   | 1 | 2 |
| 27 | 6    | 21   | 2 | 2 |
| 28 | 7    | 13   | 2 | 2 |
| 29 | 7    | 15   | 1 | 2 |
| 30 | 9    | 12   | 2 | 2 |
| 31 | 12   | 15   | 2 | 2 |
| 32 | 7    | 9    | 2 | 2 |
| 33 | 7    | 17   | 2 | 2 |
| 34 | 10   | 13   | 2 | 2 |
| 35 | 4.5  | 6    | 2 | 2 |
| 36 | 12   | 15   | 1 | 1 |
| 37 | 8    | 10   | 2 | 2 |
| 38 | 8.8  | 9    | 2 | 2 |
| 39 | 7    | 23   | 2 | 2 |
| 40 | 5.8  | 7.2  | 2 | 2 |
| 41 | 5.5  | 8    | 2 | 2 |
| 42 | 5.4  | 8    | 2 | 1 |
| 43 | 5    | 9    | 2 | 2 |
| 44 | 6    | 8    | 2 | 1 |
| 45 | 11   | 16   | 2 | 2 |
| 46 | 9    | 12.5 | 2 | 2 |
| 47 | 9    | 12   | 2 | 1 |
| 48 | 14   | 20   | 2 | 2 |
| 49 | 6.5  | 7    | 2 | 2 |
| 50 | 7    | 7    | 2 | 2 |
| 51 | 7    | 9    | 2 | 2 |

|    |      |       |   |   |
|----|------|-------|---|---|
| 1  |      |       |   |   |
| 2  | 16   | 26    | 2 | 1 |
| 3  | 4    | 6     | 2 | 2 |
| 4  | 8    | 12    | 2 | 2 |
| 5  | 5.1  | 13    | 2 | 2 |
| 6  | 6    | 10    | 2 | 1 |
| 7  | 13   | 17    | 2 | 2 |
| 8  | 3    | 6     | 2 | 1 |
| 9  | 9    | 16    | 2 | 2 |
| 10 | 8    | 10    | 2 | 1 |
| 11 | 6    | 7     | 2 | 2 |
| 12 | 12.1 | 16.2  | 2 | 2 |
| 13 | 12   | 16    | 2 | 2 |
| 14 | 7    | 10    | 2 | 2 |
| 15 | 15   | 25    | 2 | 2 |
| 16 | 6    | 6     | 2 | 2 |
| 17 | 10   | 10    | 2 | 2 |
| 18 | 8    | 10    | 2 | 2 |
| 19 | 12   | 17    | 2 | 1 |
| 20 | 8.4  | 11.6  | 2 | 2 |
| 21 | 8    | 10.8  | 2 | 2 |
| 22 | 18.3 | 24    | 2 | 2 |
| 23 | 4.8  | 6.6   | 2 | 2 |
| 24 | 5.6  | 7     | 2 | 2 |
| 25 | 7    | 9     | 2 | 2 |
| 26 | 12   | 15    | 2 | 2 |
| 27 | 16   | 18    | 2 | 2 |
| 28 | 5    | 7     | 2 | 2 |
| 29 | 10   | 13    | 2 | 2 |
| 30 | 8    | 10    | 2 | 2 |
| 31 | 7    | 9     | 2 | 2 |
| 32 | 20   | 22.6  | 2 | 2 |
| 33 | 16   | 18    | 2 | 2 |
| 34 | 3    | 7     | 2 | 1 |
| 35 | 12   | 15    | 2 | 2 |
| 36 | 20   | 24    | 2 | 2 |
| 37 | 8    | 11    | 2 | 2 |
| 38 | 8    | 10    | 2 | 2 |
| 39 | 5    | 7.2   | 2 | 2 |
| 40 | 3    | 7.5   | 2 | 2 |
| 41 | 8    | 11    | 2 | 2 |
| 42 | 24   | 28.52 | 2 | 2 |
| 43 | 3.1  | 8.6   | 2 | 2 |
| 44 | 9    | 11    | 2 | 2 |
| 45 | 9    | 11    | 2 | 2 |
| 46 | 3.1  | 4.6   | 2 | 2 |
| 47 | 10   | 11    | 2 | 2 |
| 48 | 3.1  | 8.5   | 2 | 2 |
| 49 | 5    | 6.4   | 2 | 2 |
| 50 | 15   | 17    | 1 | 2 |
| 51 | 9    | 12    | 2 | 2 |

|    |      |      |   |   |
|----|------|------|---|---|
| 1  |      |      |   |   |
| 2  | 10   | 11   | 2 | 2 |
| 3  | 8    | 10   | 2 | 1 |
| 4  | 10   | 11   | 2 | 2 |
| 5  | 9    | 11   | 2 | 2 |
| 6  | 4    | 8    | 2 | 2 |
| 7  | 10   | 17   | 2 | 2 |
| 8  | 11   | 14   | 2 | 2 |
| 9  | 12   | 15   | 2 | 2 |
| 10 | 5    | 6.4  | 2 | 2 |
| 11 | 10   | 12   | 2 | 2 |
| 12 | 4    | 6    | 2 | 2 |
| 13 | 18   | 22   | 2 | 2 |
| 14 | 10   | 12   | 2 | 2 |
| 15 | 8    | 11   | 2 | 2 |
| 16 | 8    | 12   | 2 | 2 |
| 17 | 7    | 9    | 2 | 2 |
| 18 | 18   | 20   | 2 | 2 |
| 19 | 15   | 17   | 2 | 2 |
| 20 | 5    | 7    | 2 | 2 |
| 21 | 6    | 9    | 2 | 2 |
| 22 | 9.8  | 14   | 2 | 2 |
| 23 | 9    | 11   | 2 | 2 |
| 24 | 5    | 7    | 2 | 2 |
| 25 | 14   | 15   | 1 | 2 |
| 26 | 17   | 21   | 1 | 1 |
| 27 | 8    | 11   | 2 | 2 |
| 28 | 6    | 7    | 2 | 2 |
| 29 | 5    | 7    | 1 | 2 |
| 30 | 5    | 8    | 2 | 2 |
| 31 | 8    | 10   | 1 | 2 |
| 32 | 11   | 15   | 2 | 2 |
| 33 | 8    | 10   | 2 | 2 |
| 34 | 6    | 9    | 2 | 2 |
| 35 | 8    | 12   | 1 | 2 |
| 36 | 7    | 9    | 2 | 2 |
| 37 | 11   | 15   | 2 | 2 |
| 38 | 17   | 19   | 2 | 2 |
| 39 | 12   | 15   | 2 | 2 |
| 40 | 4    | 6    | 2 | 2 |
| 41 | 6.2  | 8.3  | 2 | 2 |
| 42 | 4.2  | 6.4  | 2 | 1 |
| 43 | 7.8  | 9.7  | 2 | 2 |
| 44 | 6.5  | 8.2  | 2 | 1 |
| 45 | 6.7  | 9.1  | 2 | 2 |
| 46 | 6.1  | 12.4 | 2 | 2 |
| 47 | 10.5 | 15.3 | 2 | 2 |
| 48 | 10.8 | 14.6 | 2 | 2 |
| 49 | 6.2  | 8.1  | 2 | 2 |
| 50 | 6.8  | 8.1  | 1 | 2 |
| 51 | 6.2  | 9.7  | 2 | 1 |

|    |      |      |   |   |
|----|------|------|---|---|
| 1  |      |      |   |   |
| 2  | 5.8  | 9.7  | 2 | 2 |
| 3  | 10.8 | 18.7 | 2 | 1 |
| 4  | 5.3  | 8.5  | 1 | 2 |
| 5  | 6.3  | 7.6  | 2 | 2 |
| 6  |      |      |   |   |
| 7  | 18.1 | 24.1 | 2 | 2 |
| 8  | 9.8  | 15.9 | 2 | 2 |
| 9  | 5.2  | 6.3  | 2 | 2 |
| 10 | 8.8  | 15.5 | 2 | 2 |
| 11 | 8.2  | 11   | 2 | 2 |
| 12 | 6.2  | 9.9  | 1 | 1 |
| 13 | 6.2  | 9.4  | 2 | 1 |
| 14 | 6.8  | 10   | 2 | 2 |
| 15 | 6.2  | 8.5  | 2 | 2 |
| 16 | 17   | 22.7 | 2 | 2 |
| 17 | 8.9  | 10.6 | 2 | 2 |
| 18 | 6.2  | 8.8  | 2 | 2 |
| 19 | 6.1  | 7.8  | 2 | 1 |
| 20 | 9.8  | 11.5 | 2 | 2 |
| 21 | 9.1  | 12.6 | 2 | 2 |
| 22 | 17.6 | 26.4 | 2 | 2 |
| 23 | 14.2 | 18.2 | 1 | 1 |
| 24 | 6.3  | 9.5  | 2 | 1 |
| 25 | 9.8  | 13.7 | 2 | 1 |
| 26 | 6.1  | 8.4  | 2 | 2 |
| 27 | 6.7  | 11   | 2 | 2 |
| 28 | 6.2  | 10   | 2 | 2 |
| 29 | 5.8  | 7.7  | 2 | 2 |
| 30 | 10   | 12.8 | 2 | 2 |
| 31 | 5    | 6    | 2 | 2 |
| 32 | 12   | 19   | 2 | 2 |
| 33 | 8    | 17   | 2 | 2 |
| 34 | 8.7  | 6    | 2 | 2 |
| 35 | 7    | 14   | 2 | 2 |
| 36 | 7    | 9    | 1 | 2 |
| 37 | 7    | 11   | 2 | 2 |
| 38 | 5    | 8    | 2 | 1 |
| 39 | 5    | 11   | 2 | 2 |
| 40 | 9    | 13   | 2 | 2 |
| 41 | 8.6  | 7    | 2 | 2 |
| 42 | 10   | 5    | 2 | 2 |
| 43 | 10   | 5    | 2 | 2 |
| 44 | 7    | 10   | 2 | 2 |
| 45 | 9    | 14   | 2 | 2 |
| 46 | 6    | 8    | 2 | 2 |
| 47 | 7    | 10   | 2 | 2 |
| 48 | 7    | 10   | 1 | 2 |
| 49 | 12   | 14   | 2 | 2 |
| 50 | 6    | 24   | 2 | 2 |
| 51 | 16.2 | 18.9 | 2 | 2 |
| 52 | 6.2  | 9.8  | 2 | 2 |

|    |      |      |   |   |
|----|------|------|---|---|
| 1  |      |      |   |   |
| 2  | 8.6  | 11.9 | 2 | 2 |
| 3  | 8.9  | 13.8 | 2 | 2 |
| 4  | 5.6  | 7    | 2 | 2 |
| 5  | 10.8 | 23.8 | 2 | 2 |
| 6  | 7.4  | 10.9 | 2 | 1 |
| 7  | 11.8 | 20.2 | 2 | 1 |
| 8  | 5.2  | 7.1  | 2 | 2 |
| 9  | 6.8  | 10.1 | 2 | 2 |
| 10 | 8.7  | 11.5 | 2 | 2 |
| 11 | 5.2  | 7.6  | 2 | 2 |
| 12 | 6.7  | 8.8  | 2 | 2 |
| 13 | 7.8  | 10.4 | 2 | 2 |
| 14 | 8.5  | 21.1 | 2 | 1 |
| 15 | 6.9  | 8.8  | 2 | 2 |
| 16 | 21.2 | 24.2 | 1 | 2 |
| 17 | 12.4 | 17   | 2 | 2 |
| 18 | 10.4 | 15   | 2 | 1 |
| 19 | 6.3  | 9.4  | 2 | 1 |
| 20 | 10   | 13   | 1 | 2 |
| 21 | 10.9 | 13.8 | 2 | 2 |
| 22 | 6    | 7.7  | 2 | 1 |
| 23 | 6.7  | 10.4 | 1 | 1 |
| 24 | 5.7  | 9.3  | 2 | 2 |
| 25 | 9    | 10   | 2 | 2 |
| 26 | 10.5 | 15.4 | 2 | 2 |
| 27 | 12   | 14   | 2 | 2 |
| 28 | 5.5  | 6.6  | 2 | 2 |
| 29 | 5.8  | 8.9  | 2 | 2 |
| 30 | 9.4  | 14.3 | 2 | 2 |
| 31 | 6.2  | 9.5  | 2 | 2 |
| 32 | 9.8  | 13.3 | 2 | 2 |
| 33 | 10.1 | 14.6 | 2 | 2 |
| 34 | 6    | 11.4 | 2 | 2 |
| 35 | 6    | 8.4  | 2 | 2 |
| 36 | 6.8  | 12.5 | 2 | 2 |
| 37 | 8.9  | 13.9 | 2 | 2 |
| 38 | 10   | 12.2 | 2 | 2 |
| 39 | 16.2 | 20.5 | 2 | 1 |
| 40 | 6    | 8.8  | 2 | 2 |
| 41 | 11.6 | 19.6 | 2 | 1 |
| 42 | 8.8  | 15.6 | 2 | 1 |
| 43 | 10.8 | 15.4 | 1 | 2 |
| 44 | 11.6 | 18.2 | 2 | 2 |
| 45 | 9    | 10   | 1 | 2 |
| 46 | 6.5  | 7.9  | 1 | 1 |
| 47 | 5.4  | 6.4  | 2 | 2 |
| 48 | 4.5  | 9.3  | 2 | 1 |
| 49 | 6.1  | 7.2  | 2 | 2 |
| 50 | 5.9  | 6.5  | 2 | 2 |
| 51 | 8.9  | 11   | 2 | 1 |

|    |     |     |   |   |
|----|-----|-----|---|---|
| 1  |     |     |   |   |
| 2  | 6.6 | 7.7 | 2 | 1 |
| 3  | 5.7 | 10  | 2 | 1 |
| 4  |     |     |   |   |
| 5  |     |     |   |   |
| 6  |     |     |   |   |
| 7  |     |     |   |   |
| 8  |     |     |   |   |
| 9  |     |     |   |   |
| 10 |     |     |   |   |
| 11 |     |     |   |   |
| 12 |     |     |   |   |
| 13 |     |     |   |   |
| 14 |     |     |   |   |
| 15 |     |     |   |   |
| 16 |     |     |   |   |
| 17 |     |     |   |   |
| 18 |     |     |   |   |
| 19 |     |     |   |   |
| 20 |     |     |   |   |
| 21 |     |     |   |   |
| 22 |     |     |   |   |
| 23 |     |     |   |   |
| 24 |     |     |   |   |
| 25 |     |     |   |   |
| 26 |     |     |   |   |
| 27 |     |     |   |   |
| 28 |     |     |   |   |
| 29 |     |     |   |   |
| 30 |     |     |   |   |
| 31 |     |     |   |   |
| 32 |     |     |   |   |
| 33 |     |     |   |   |
| 34 |     |     |   |   |
| 35 |     |     |   |   |
| 36 |     |     |   |   |
| 37 |     |     |   |   |
| 38 |     |     |   |   |
| 39 |     |     |   |   |
| 40 |     |     |   |   |
| 41 |     |     |   |   |
| 42 |     |     |   |   |
| 43 |     |     |   |   |
| 44 |     |     |   |   |
| 45 |     |     |   |   |
| 46 |     |     |   |   |
| 47 |     |     |   |   |
| 48 |     |     |   |   |
| 49 |     |     |   |   |
| 50 |     |     |   |   |
| 51 |     |     |   |   |
| 52 |     |     |   |   |
| 53 |     |     |   |   |
| 54 |     |     |   |   |
| 55 |     |     |   |   |
| 56 |     |     |   |   |
| 57 |     |     |   |   |
| 58 |     |     |   |   |
| 59 |     |     |   |   |
| 60 |     |     |   |   |

For peer review only



|    | PA | Q59_use_fitting_f_war<br>e | Q71_HO_trauma | Q73_foot_care_reg |
|----|----|----------------------------|---------------|-------------------|
| 1  |    |                            |               |                   |
| 2  |    |                            |               |                   |
| 3  |    |                            |               |                   |
| 4  | 2  | 1                          | 2             | 1                 |
| 5  | 1  | 1                          | 2             | 1                 |
| 6  | 2  | 1                          | 2             | 1                 |
| 7  | 1  | 1                          | 2             | 1                 |
| 8  | 1  | 1                          | 2             | 1                 |
| 9  | 1  | 1                          | 2             | 1                 |
| 10 | 1  | 1                          | 2             | 1                 |
| 11 | 2  | 1                          | 2             | 1                 |
| 12 | 2  | 1                          | 1             | 1                 |
| 13 | 1  | 1                          | 2             | 1                 |
| 14 | 2  | 1                          | 2             | 1                 |
| 15 | 2  | 1                          | 2             | 1                 |
| 16 | 2  | 1                          | 2             | 1                 |
| 17 | 2  | 1                          | 2             | 1                 |
| 18 | 1  | 1                          | 2             | 1                 |
| 19 | 2  | 1                          | 2             | 1                 |
| 20 | 2  | 1                          | 2             | 1                 |
| 21 | 2  | 1                          | 2             | 1                 |
| 22 | 2  | 1                          | 2             | 1                 |
| 23 | 2  | 1                          | 2             | 2                 |
| 24 | 2  | 1                          | 2             | 1                 |
| 25 | 1  | 1                          | 2             | 1                 |
| 26 | 2  | 1                          | 2             | 1                 |
| 27 | 1  | 1                          | 2             | 1                 |
| 28 | 1  | 1                          | 2             | 1                 |
| 29 | 1  | 1                          | 2             | 1                 |
| 30 | 1  | 1                          | 2             | 2                 |
| 31 | 2  | 1                          | 2             | 1                 |
| 32 | 2  | 1                          | 1             | 1                 |
| 33 | 2  | 1                          | 2             | 1                 |
| 34 | 1  | 1                          | 2             | 2                 |
| 35 | 1  | 1                          | 1             | 1                 |
| 36 | 2  | 1                          | 2             | 1                 |
| 37 | 2  | 1                          | 2             | 1                 |
| 38 | 2  | 1                          | 2             | 1                 |
| 39 | 2  | 1                          | 2             | 2                 |
| 40 | 2  | 2                          | 2             | 1                 |
| 41 | 2  | 1                          | 2             | 1                 |
| 42 | 1  | 2                          | 1             | 1                 |
| 43 | 2  | 1                          | 2             | 2                 |
| 44 | 2  | 1                          | 2             | 1                 |
| 45 | 2  | 1                          | 2             | 1                 |
| 46 | 2  | 1                          | 2             | 1                 |
| 47 | 2  | 1                          | 2             | 1                 |
| 48 | 2  | 1                          | 1             | 2                 |
| 49 | 1  | 1                          | 2             | 1                 |
| 50 | 2  | 1                          | 2             | 1                 |
| 51 | 1  | 1                          | 2             | 1                 |
| 52 | 2  | 1                          | 2             | 1                 |
| 53 | 2  | 1                          | 2             | 1                 |
| 54 | 2  | 1                          | 2             | 1                 |
| 55 | 2  | 1                          | 2             | 1                 |
| 56 | 2  | 2                          | 2             | 1                 |
| 57 | 1  | 1                          | 2             | 1                 |
| 58 | 2  | 1                          | 1             | 1                 |
| 59 | 2  | 1                          | 2             | 1                 |
| 60 | 2  | 1                          | 1             | 1                 |

|    |   |   |   |   |
|----|---|---|---|---|
| 1  |   |   |   |   |
| 2  | 2 | 1 | 2 | 1 |
| 3  | 1 | 1 | 2 | 1 |
| 4  | 1 | 1 | 1 | 1 |
| 5  | 2 | 1 | 2 | 1 |
| 6  | 2 | 1 | 2 | 2 |
| 7  | 2 | 1 | 2 | 1 |
| 8  | 2 | 1 | 2 | 1 |
| 9  | 2 | 1 | 2 | 1 |
| 10 | 2 | 2 | 2 | 2 |
| 11 | 2 | 1 | 1 | 1 |
| 12 | 2 | 1 | 2 | 2 |
| 13 | 2 | 1 | 2 | 1 |
| 14 | 2 | 1 | 2 | 1 |
| 15 | 1 | 1 | 2 | 1 |
| 16 | 2 | 1 | 2 | 1 |
| 17 | 1 | 1 | 2 | 1 |
| 18 | 2 | 1 | 2 | 1 |
| 19 | 2 | 1 | 2 | 1 |
| 20 | 2 | 1 | 1 | 1 |
| 21 | 1 | 1 | 2 | 1 |
| 22 | 1 | 1 | 2 | 1 |
| 23 | 2 | 1 | 2 | 1 |
| 24 | 2 | 1 | 1 | 1 |
| 25 | 2 | 1 | 2 | 1 |
| 26 | 1 | 1 | 2 | 1 |
| 27 | 1 | 1 | 2 | 1 |
| 28 | 2 | 1 | 2 | 1 |
| 29 | 2 | 1 | 2 | 1 |
| 30 | 2 | 1 | 2 | 1 |
| 31 | 2 | 1 | 2 | 1 |
| 32 | 2 | 1 | 2 | 1 |
| 33 | 2 | 1 | 2 | 1 |
| 34 | 2 | 1 | 2 | 1 |
| 35 | 2 | 1 | 2 | 1 |
| 36 | 2 | 1 | 2 | 1 |
| 37 | 2 | 1 | 1 | 1 |
| 38 | 1 | 1 | 2 | 1 |
| 39 | 1 | 2 | 2 | 1 |
| 40 | 1 | 1 | 1 | 1 |
| 41 | 2 | 1 | 2 | 2 |
| 42 | 1 | 1 | 2 | 1 |
| 43 | 2 | 2 | 2 | 1 |
| 44 | 1 | 2 | 2 | 1 |
| 45 | 1 | 1 | 2 | 1 |
| 46 | 2 | 1 | 2 | 2 |
| 47 | 1 | 1 | 2 | 1 |
| 48 | 2 | 1 | 2 | 1 |
| 49 | 1 | 1 | 2 | 1 |
| 50 | 2 | 1 | 2 | 1 |
| 51 | 1 | 1 | 2 | 1 |
| 52 | 1 | 1 | 2 | 1 |
| 53 | 1 | 1 | 2 | 1 |
| 54 | 2 | 2 | 2 | 1 |
| 55 | 1 | 1 | 1 | 1 |
| 56 | 2 | 1 | 2 | 1 |
| 57 | 1 | 1 | 2 | 2 |
| 58 | 2 | 1 | 2 | 1 |
| 59 | 1 | 1 | 2 | 1 |
| 60 | 2 | 1 | 2 | 2 |

|    |   |   |   |   |
|----|---|---|---|---|
| 1  |   |   |   |   |
| 2  | 1 | 2 | 2 | 1 |
| 3  | 1 | 1 | 2 | 2 |
| 4  | 2 | 1 | 2 | 2 |
| 5  | 2 | 1 | 1 | 1 |
| 6  | 2 | 1 | 2 | 1 |
| 7  | 1 | 1 | 2 | 2 |
| 8  | 2 | 1 | 2 | 1 |
| 9  | 1 | 1 | 2 | 2 |
| 10 | 2 | 1 | 2 | 1 |
| 11 | 1 | 1 | 2 | 2 |
| 12 | 1 | 1 | 2 | 1 |
| 13 | 1 | 1 | 2 | 2 |
| 14 | 1 | 1 | 2 | 1 |
| 15 | 2 | 1 | 2 | 1 |
| 16 | 2 | 1 | 2 | 1 |
| 17 | 1 | 1 | 2 | 1 |
| 18 | 2 | 1 | 2 | 1 |
| 19 | 2 | 1 | 2 | 1 |
| 20 | 2 | 1 | 2 | 2 |
| 21 | 2 | 1 | 2 | 1 |
| 22 | 2 | 1 | 2 | 2 |
| 23 | 1 | 1 | 2 | 1 |
| 24 | 1 | 1 | 2 | 1 |
| 25 | 2 | 1 | 1 | 1 |
| 26 | 1 | 1 | 1 | 1 |
| 27 | 2 | 1 | 1 | 1 |
| 28 | 2 | 1 | 2 | 1 |
| 29 | 1 | 1 | 2 | 1 |
| 30 | 1 | 2 | 1 | 1 |
| 31 | 2 | 1 | 2 | 1 |
| 32 | 2 | 1 | 2 | 1 |
| 33 | 2 | 1 | 2 | 1 |
| 34 | 2 | 1 | 2 | 1 |
| 35 | 2 | 1 | 2 | 1 |
| 36 | 2 | 1 | 2 | 1 |
| 37 | 2 | 1 | 2 | 1 |
| 38 | 2 | 1 | 2 | 1 |
| 39 | 1 | 1 | 2 | 1 |
| 40 | 1 | 2 | 1 | 1 |
| 41 | 1 | 1 | 2 | 1 |
| 42 | 1 | 1 | 2 | 1 |
| 43 | 1 | 1 | 2 | 1 |
| 44 | 1 | 1 | 2 | 1 |
| 45 | 1 | 1 | 2 | 1 |
| 46 | 1 | 1 | 1 | 1 |
| 47 | 2 | 1 | 2 | 1 |
| 48 | 1 | 1 | 2 | 1 |
| 49 | 2 | 1 | 2 | 1 |
| 50 | 2 | 1 | 2 | 1 |
| 51 | 2 | 1 | 2 | 1 |
| 52 | 2 | 1 | 2 | 1 |
| 53 | 2 | 1 | 2 | 1 |
| 54 | 2 | 1 | 2 | 1 |
| 55 | 1 | 2 | 2 | 1 |
| 56 | 2 | 2 | 2 | 1 |
| 57 | 1 | 1 | 2 | 1 |
| 58 | 2 | 1 | 2 | 1 |
| 59 | 2 | 1 | 2 | 1 |
| 60 | 2 | 1 | 2 | 1 |

For peer review only

|    |   |   |   |   |
|----|---|---|---|---|
| 1  |   |   |   |   |
| 2  | 2 | 1 | 2 | 1 |
| 3  | 1 | 1 | 2 | 1 |
| 4  | 1 | 1 | 2 | 1 |
| 5  | 2 | 1 | 2 | 1 |
| 6  | 2 | 1 | 2 | 1 |
| 7  | 2 | 2 | 2 | 1 |
| 8  | 2 | 1 | 2 | 1 |
| 9  | 1 | 1 | 2 | 1 |
| 10 | 2 | 1 | 2 | 1 |
| 11 | 2 | 1 | 2 | 1 |
| 12 | 2 | 2 | 2 | 1 |
| 13 | 2 | 1 | 2 | 1 |
| 14 | 2 | 1 | 2 | 1 |
| 15 | 1 | 1 | 2 | 1 |
| 16 | 2 | 1 | 2 | 1 |
| 17 | 1 | 1 | 2 | 1 |
| 18 | 1 | 1 | 2 | 1 |
| 19 | 2 | 1 | 2 | 1 |
| 20 | 2 | 1 | 2 | 1 |
| 21 | 2 | 1 | 2 | 1 |
| 22 | 2 | 1 | 2 | 1 |
| 23 | 2 | 1 | 2 | 1 |
| 24 | 2 | 1 | 2 | 1 |
| 25 | 2 | 1 | 2 | 2 |
| 26 | 2 | 1 | 2 | 1 |
| 27 | 2 | 1 | 2 | 1 |
| 28 | 1 | 2 | 2 | 1 |
| 29 | 2 | 2 | 2 | 1 |
| 30 | 1 | 2 | 2 | 1 |
| 31 | 1 | 1 | 1 | 1 |
| 32 | 2 | 1 | 2 | 2 |
| 33 | 1 | 1 | 2 | 1 |
| 34 | 1 | 1 | 2 | 1 |
| 35 | 2 | 1 | 1 | 1 |
| 36 | 1 | 1 | 2 | 1 |
| 37 | 1 | 1 | 2 | 1 |
| 38 | 2 | 1 | 2 | 1 |
| 39 | 2 | 1 | 2 | 1 |
| 40 | 2 | 1 | 2 | 1 |
| 41 | 1 | 1 | 1 | 1 |
| 42 | 1 | 2 | 2 | 1 |
| 43 | 2 | 2 | 2 | 1 |
| 44 | 1 | 2 | 2 | 1 |
| 45 | 2 | 1 | 1 | 1 |
| 46 | 2 | 1 | 1 | 2 |
| 47 | 1 | 2 | 2 | 1 |
| 48 | 2 | 1 | 2 | 1 |
| 49 | 2 | 1 | 2 | 1 |
| 50 | 1 | 2 | 1 | 2 |
| 51 | 2 | 1 | 2 | 1 |
| 52 | 1 | 1 | 2 | 1 |
| 53 | 2 | 1 | 2 | 1 |
| 54 | 2 | 1 | 2 | 1 |
| 55 | 2 | 2 | 2 | 1 |
| 56 | 1 | 1 | 2 | 1 |
| 57 | 2 | 2 | 2 | 1 |
| 58 | 1 | 1 | 2 | 1 |
| 59 | 2 | 1 | 2 | 1 |
| 60 | 1 | 2 | 2 | 1 |

|    |   |   |   |   |
|----|---|---|---|---|
| 1  |   |   |   |   |
| 2  | 2 | 1 | 2 | 2 |
| 3  | 2 | 1 | 2 | 1 |
| 4  | 2 | 2 | 2 | 1 |
| 5  | 2 | 2 | 1 | 2 |
| 6  | 1 | 2 | 1 | 2 |
| 7  | 1 | 1 | 2 | 1 |
| 8  | 2 | 1 | 2 | 1 |
| 9  | 2 | 1 | 2 | 1 |
| 10 | 2 | 1 | 2 | 1 |
| 11 | 2 | 2 | 2 | 1 |
| 12 | 2 | 1 | 2 | 1 |
| 13 | 2 | 1 | 2 | 1 |
| 14 | 1 | 1 | 2 | 1 |
| 15 | 1 | 1 | 1 | 2 |
| 16 | 2 | 2 | 2 | 1 |
| 17 | 1 | 1 | 2 | 1 |
| 18 | 2 | 1 | 2 | 1 |
| 19 | 2 | 1 | 2 | 1 |
| 20 | 1 | 1 | 2 | 1 |
| 21 | 2 | 1 | 1 | 1 |
| 22 | 2 | 1 | 2 | 2 |
| 23 | 2 | 1 | 2 | 1 |
| 24 | 2 | 1 | 2 | 1 |
| 25 | 1 | 1 | 2 | 1 |
| 26 | 1 | 1 | 2 | 2 |
| 27 | 1 | 1 | 2 | 2 |
| 28 | 1 | 2 | 1 | 1 |
| 29 | 1 | 1 | 2 | 1 |
| 30 | 1 | 1 | 2 | 1 |
| 31 | 1 | 1 | 2 | 1 |
| 32 | 1 | 1 | 1 | 1 |
| 33 | 1 | 1 | 2 | 2 |
| 34 | 1 | 1 | 1 | 1 |
| 35 | 1 | 1 | 2 | 2 |
| 36 | 1 | 1 | 2 | 1 |
| 37 | 1 | 1 | 2 | 1 |
| 38 | 2 | 1 | 2 | 1 |
| 39 | 2 | 1 | 1 | 1 |
| 40 | 1 | 1 | 2 | 2 |
| 41 | 1 | 1 | 2 | 1 |
| 42 | 1 | 1 | 2 | 1 |
| 43 | 2 | 1 | 1 | 1 |
| 44 | 1 | 1 | 1 | 1 |
| 45 | 2 | 1 | 2 | 1 |
| 46 | 2 | 1 | 2 | 1 |
| 47 | 1 | 1 | 1 | 1 |
| 48 | 1 | 2 | 2 | 1 |
| 49 | 1 | 1 | 2 | 1 |
| 50 | 2 | 1 | 2 | 1 |
| 51 | 1 | 1 | 1 | 1 |
| 52 | 2 | 1 | 1 | 1 |
| 53 | 2 | 1 | 1 | 1 |
| 54 | 1 | 1 | 2 | 1 |
| 55 | 2 | 1 | 2 | 1 |
| 56 | 2 | 1 | 2 | 1 |
| 57 | 2 | 1 | 1 | 1 |
| 58 | 2 | 1 | 2 | 1 |
| 59 | 2 | 1 | 2 | 1 |
| 60 | 2 | 1 | 2 | 1 |
|    | 2 | 1 | 2 | 1 |

For peer review only

|    |   |   |   |   |
|----|---|---|---|---|
| 1  |   |   |   |   |
| 2  | 2 | 2 | 2 | 1 |
| 3  | 2 | 1 | 1 | 1 |
| 4  | 1 | 1 | 2 | 1 |
| 5  | 1 | 1 | 1 | 2 |
| 6  | 2 | 2 | 1 | 1 |
| 7  | 1 | 1 | 2 | 1 |
| 8  | 2 | 1 | 2 | 1 |
| 9  | 1 | 1 | 2 | 1 |
| 10 | 2 | 1 | 2 | 1 |
| 11 | 1 | 1 | 1 | 1 |
| 12 | 2 | 1 | 2 | 2 |
| 13 | 2 | 1 | 2 | 1 |
| 14 | 2 | 1 | 1 | 1 |
| 15 | 1 | 1 | 2 | 1 |
| 16 | 1 | 1 | 1 | 2 |
| 17 | 2 | 2 | 2 | 1 |
| 18 | 1 | 1 | 2 | 1 |
| 19 | 2 | 1 | 2 | 1 |
| 20 | 1 | 1 | 2 | 1 |
| 21 | 2 | 1 | 2 | 1 |
| 22 | 1 | 1 | 2 | 1 |
| 23 | 2 | 1 | 1 | 1 |
| 24 | 2 | 1 | 2 | 2 |
| 25 | 2 | 1 | 2 | 1 |
| 26 | 1 | 1 | 2 | 1 |
| 27 | 1 | 1 | 2 | 1 |
| 28 | 1 | 1 | 2 | 1 |
| 29 | 1 | 1 | 2 | 1 |
| 30 | 1 | 1 | 2 | 1 |
| 31 | 1 | 1 | 2 | 1 |
| 32 | 1 | 1 | 2 | 1 |
| 33 | 1 | 1 | 1 | 1 |
| 34 | 1 | 1 | 2 | 2 |
| 35 | 1 | 1 | 2 | 1 |
| 36 | 2 | 1 | 1 | 1 |
| 37 | 1 | 1 | 2 | 1 |
| 38 | 1 | 1 | 1 | 1 |
| 39 | 2 | 2 | 2 | 1 |
| 40 | 2 | 2 | 1 | 2 |
| 41 | 1 | 2 | 1 | 2 |
| 42 | 1 | 1 | 2 | 1 |
| 43 | 1 | 1 | 2 | 1 |
| 44 | 1 | 1 | 2 | 1 |
| 45 | 1 | 1 | 2 | 1 |
| 46 | 1 | 1 | 2 | 1 |
| 47 | 1 | 1 | 1 | 1 |
| 48 | 2 | 2 | 2 | 1 |
| 49 | 2 | 2 | 1 | 2 |
| 50 | 1 | 2 | 1 | 2 |
| 51 | 1 | 1 | 2 | 1 |
| 52 | 2 | 1 | 2 | 1 |
| 53 | 2 | 1 | 2 | 1 |
| 54 | 2 | 2 | 2 | 1 |
| 55 | 2 | 1 | 2 | 1 |
| 56 | 2 | 2 | 2 | 1 |
| 57 | 2 | 1 | 2 | 1 |
| 58 | 1 | 1 | 2 | 1 |
| 59 | 1 | 1 | 1 | 2 |
| 60 | 2 | 2 | 2 | 1 |

|    |   |   |   |   |
|----|---|---|---|---|
| 1  |   |   |   |   |
| 2  | 1 | 1 | 2 | 1 |
| 3  | 2 | 1 | 2 | 1 |
| 4  | 1 | 2 | 1 | 1 |
| 5  | 1 | 1 | 2 | 1 |
| 6  | 1 | 1 | 2 | 2 |
| 7  | 1 | 1 | 2 | 1 |
| 8  | 1 | 1 | 2 | 1 |
| 9  | 2 | 1 | 2 | 1 |
| 10 | 2 | 1 | 1 | 1 |
| 11 | 1 | 1 | 1 | 1 |
| 12 | 1 | 1 | 1 | 1 |
| 13 | 1 | 1 | 1 | 1 |
| 14 | 1 | 1 | 2 | 1 |
| 15 | 2 | 1 | 2 | 1 |
| 16 | 1 | 1 | 2 | 1 |
| 17 | 2 | 1 | 2 | 1 |
| 18 | 2 | 1 | 1 | 1 |
| 19 | 2 | 1 | 2 | 1 |
| 20 | 2 | 1 | 2 | 1 |
| 21 | 1 | 1 | 2 | 1 |
| 22 | 2 | 2 | 2 | 1 |
| 23 | 1 | 1 | 2 | 1 |
| 24 | 2 | 1 | 2 | 2 |
| 25 | 2 | 1 | 2 | 1 |
| 26 | 2 | 1 | 2 | 1 |
| 27 | 2 | 1 | 2 | 1 |
| 28 | 1 | 1 | 2 | 1 |
| 29 | 1 | 1 | 2 | 1 |
| 30 | 2 | 2 | 2 | 1 |
| 31 | 2 | 1 | 2 | 1 |
| 32 | 2 | 1 | 2 | 1 |
| 33 | 2 | 1 | 2 | 1 |
| 34 | 2 | 1 | 2 | 1 |
| 35 | 1 | 1 | 2 | 1 |
| 36 | 2 | 1 | 2 | 1 |
| 37 | 2 | 1 | 2 | 1 |
| 38 | 2 | 1 | 2 | 1 |
| 39 | 1 | 1 | 2 | 1 |
| 40 | 1 | 1 | 1 | 1 |
| 41 | 1 | 1 | 2 | 1 |
| 42 | 1 | 1 | 2 | 1 |
| 43 | 1 | 1 | 2 | 1 |
| 44 | 1 | 1 | 2 | 1 |
| 45 | 1 | 1 | 2 | 1 |
| 46 | 1 | 1 | 2 | 1 |
| 47 | 1 | 1 | 2 | 1 |
| 48 | 1 | 1 | 2 | 1 |
| 49 | 1 | 1 | 1 | 1 |
| 50 | 1 | 1 | 2 | 1 |
| 51 | 1 | 1 | 2 | 1 |
| 52 | 1 | 1 | 2 | 1 |
| 53 | 1 | 1 | 2 | 1 |
| 54 | 1 | 1 | 2 | 1 |
| 55 | 1 | 1 | 2 | 1 |
| 56 | 1 | 1 | 2 | 1 |
| 57 | 2 | 1 | 2 | 1 |
| 58 | 2 | 1 | 1 | 2 |
| 59 | 2 | 1 | 2 | 1 |
| 60 | 2 | 1 | 2 | 1 |

For peer review only

|    |   |   |   |   |
|----|---|---|---|---|
| 1  |   |   |   |   |
| 2  | 2 | 1 | 2 | 1 |
| 3  | 2 | 1 | 2 | 1 |
| 4  | 2 | 1 | 2 | 1 |
| 5  | 2 | 1 | 2 | 1 |
| 6  | 2 | 1 | 2 | 1 |
| 7  | 2 | 1 | 2 | 1 |
| 8  | 2 | 1 | 2 | 1 |
| 9  | 2 | 1 | 2 | 1 |
| 10 | 2 | 1 | 2 | 1 |
| 11 | 2 | 1 | 2 | 1 |
| 12 | 2 | 1 | 2 | 1 |
| 13 | 2 | 1 | 2 | 1 |
| 14 | 2 | 1 | 2 | 1 |
| 15 | 2 | 2 | 2 | 1 |
| 16 | 2 | 1 | 1 | 1 |
| 17 | 2 | 1 | 2 | 1 |
| 18 | 2 | 1 | 2 | 1 |
| 19 | 2 | 1 | 2 | 1 |
| 20 | 2 | 1 | 2 | 2 |
| 21 | 2 | 2 | 2 | 1 |
| 22 | 2 | 2 | 1 | 1 |
| 23 | 2 | 1 | 2 | 1 |
| 24 | 2 | 1 | 2 | 2 |
| 25 | 2 | 1 | 2 | 1 |
| 26 | 2 | 1 | 2 | 1 |
| 27 | 1 | 1 | 2 | 1 |
| 28 | 2 | 1 | 2 | 2 |
| 29 | 2 | 1 | 1 | 1 |
| 30 | 2 | 1 | 2 | 1 |
| 31 | 2 | 1 | 2 | 1 |
| 32 | 2 | 1 | 2 | 1 |
| 33 | 2 | 1 | 2 | 1 |
| 34 | 2 | 2 | 2 | 1 |
| 35 | 2 | 1 | 2 | 1 |
| 36 | 2 | 1 | 2 | 1 |
| 37 | 2 | 1 | 2 | 1 |
| 38 | 2 | 1 | 2 | 1 |
| 39 | 2 | 1 | 2 | 1 |
| 40 | 2 | 1 | 2 | 1 |
| 41 | 2 | 1 | 2 | 1 |
| 42 | 2 | 1 | 2 | 1 |
| 43 | 2 | 1 | 2 | 1 |
| 44 | 2 | 1 | 2 | 1 |
| 45 | 2 | 1 | 2 | 1 |
| 46 | 1 | 1 | 2 | 1 |
| 47 | 1 | 1 | 2 | 1 |
| 48 | 2 | 1 | 2 | 1 |
| 49 | 2 | 1 | 2 | 1 |
| 50 | 2 | 1 | 2 | 1 |
| 51 | 2 | 1 | 1 | 1 |
| 52 | 1 | 1 | 2 | 1 |
| 53 | 1 | 1 | 2 | 1 |
| 54 | 1 | 1 | 2 | 1 |
| 55 | 1 | 1 | 2 | 1 |
| 56 | 1 | 1 | 2 | 1 |
| 57 | 1 | 1 | 2 | 1 |
| 58 | 2 | 1 | 2 | 1 |
| 59 | 1 | 1 | 2 | 2 |
| 60 | 2 | 1 | 1 | 1 |

For peer review only



|    |   |   |   |   |
|----|---|---|---|---|
| 1  |   |   |   |   |
| 2  | 2 | 1 | 2 | 1 |
| 3  | 2 | 1 | 2 | 1 |
| 4  | 2 | 1 | 1 | 1 |
| 5  | 2 | 1 | 2 | 1 |
| 6  | 2 | 1 | 2 | 1 |
| 7  | 2 | 1 | 2 | 1 |
| 8  | 2 | 1 | 2 | 1 |
| 9  | 2 | 1 | 2 | 1 |
| 10 | 1 | 1 | 2 | 1 |
| 11 | 2 | 1 | 2 | 1 |
| 12 | 1 | 1 | 2 | 1 |
| 13 | 2 | 1 | 2 | 1 |
| 14 | 2 | 1 | 2 | 1 |
| 15 | 2 | 1 | 2 | 1 |
| 16 | 2 | 1 | 2 | 1 |
| 17 | 2 | 1 | 2 | 1 |
| 18 | 2 | 1 | 2 | 1 |
| 19 | 2 | 1 | 2 | 1 |
| 20 | 2 | 1 | 1 | 1 |
| 21 | 2 | 1 | 2 | 1 |
| 22 | 2 | 1 | 2 | 1 |
| 23 | 2 | 1 | 2 | 1 |
| 24 | 1 | 1 | 2 | 1 |
| 25 | 2 | 1 | 2 | 1 |
| 26 | 2 | 1 | 2 | 2 |
| 27 | 2 | 1 | 2 | 1 |
| 28 | 2 | 1 | 2 | 1 |
| 29 | 2 | 1 | 2 | 1 |
| 30 | 2 | 1 | 2 | 1 |
| 31 | 2 | 1 | 2 | 1 |
| 32 | 2 | 1 | 2 | 2 |
| 33 | 2 | 1 | 2 | 1 |
| 34 | 2 | 1 | 2 | 1 |
| 35 | 2 | 1 | 2 | 1 |
| 36 | 2 | 1 | 2 | 1 |
| 37 | 1 | 1 | 2 | 1 |
| 38 | 2 | 1 | 2 | 2 |
| 39 | 1 | 1 | 2 | 1 |
| 40 | 2 | 1 | 1 | 1 |
| 41 | 2 | 1 | 2 | 1 |
| 42 | 2 | 1 | 2 | 1 |
| 43 | 2 | 1 | 2 | 1 |
| 44 | 2 | 1 | 2 | 1 |
| 45 | 2 | 1 | 2 | 1 |
| 46 | 2 | 1 | 2 | 2 |
| 47 | 2 | 1 | 2 | 1 |
| 48 | 2 | 1 | 2 | 1 |
| 49 | 2 | 1 | 2 | 1 |
| 50 | 2 | 1 | 2 | 1 |
| 51 | 2 | 1 | 2 | 1 |
| 52 | 2 | 1 | 2 | 1 |
| 53 | 2 | 1 | 2 | 1 |
| 54 | 2 | 1 | 2 | 1 |
| 55 | 2 | 1 | 2 | 1 |
| 56 | 2 | 1 | 2 | 1 |
| 57 | 2 | 1 | 2 | 2 |
| 58 | 2 | 1 | 2 | 1 |
| 59 | 2 | 1 | 2 | 1 |
| 60 | 2 | 1 | 1 | 1 |
|    | 2 | 1 | 2 | 1 |

For peer review only

|    |   |   |   |   |
|----|---|---|---|---|
| 1  |   |   |   |   |
| 2  | 2 | 1 | 2 | 1 |
| 3  | 2 | 1 | 2 | 1 |
| 4  | 2 | 1 | 2 | 1 |
| 5  | 2 | 1 | 2 | 1 |
| 6  | 2 | 1 | 1 | 1 |
| 7  | 2 | 1 | 1 | 1 |
| 8  | 2 | 1 | 1 | 1 |
| 9  | 2 | 1 | 2 | 1 |
| 10 | 2 | 1 | 2 | 1 |
| 11 | 2 | 1 | 2 | 1 |
| 12 | 2 | 1 | 2 | 1 |
| 13 | 2 | 1 | 2 | 1 |
| 14 | 2 | 1 | 2 | 1 |
| 15 | 2 | 1 | 2 | 1 |
| 16 | 2 | 1 | 2 | 1 |
| 17 | 2 | 1 | 2 | 1 |
| 18 | 2 | 1 | 2 | 2 |
| 19 | 2 | 1 | 2 | 1 |
| 20 | 2 | 1 | 2 | 1 |
| 21 | 2 | 1 | 2 | 1 |
| 22 | 2 | 1 | 2 | 1 |
| 23 | 2 | 1 | 2 | 1 |
| 24 | 2 | 1 | 2 | 1 |
| 25 | 2 | 1 | 2 | 1 |
| 26 | 2 | 1 | 1 | 1 |
| 27 | 2 | 1 | 2 | 1 |
| 28 | 2 | 1 | 1 | 1 |
| 29 | 2 | 1 | 2 | 1 |
| 30 | 2 | 1 | 2 | 1 |
| 31 | 2 | 1 | 2 | 1 |
| 32 | 2 | 1 | 2 | 1 |
| 33 | 2 | 1 | 2 | 1 |
| 34 | 2 | 1 | 2 | 1 |
| 35 | 2 | 1 | 2 | 1 |
| 36 | 2 | 1 | 2 | 1 |
| 37 | 2 | 1 | 2 | 1 |
| 38 | 2 | 1 | 2 | 1 |
| 39 | 2 | 1 | 2 | 1 |
| 40 | 2 | 1 | 2 | 1 |
| 41 | 2 | 1 | 2 | 1 |
| 42 | 2 | 1 | 2 | 1 |
| 43 | 2 | 1 | 2 | 1 |
| 44 | 2 | 1 | 2 | 1 |
| 45 | 2 | 1 | 2 | 1 |
| 46 | 2 | 1 | 2 | 1 |
| 47 | 2 | 1 | 2 | 1 |
| 48 | 2 | 2 | 1 | 1 |
| 49 | 2 | 1 | 2 | 1 |
| 50 | 2 | 1 | 2 | 1 |
| 51 | 2 | 1 | 2 | 1 |
| 52 | 2 | 1 | 2 | 1 |
| 53 | 2 | 1 | 2 | 1 |
| 54 | 2 | 1 | 2 | 1 |
| 55 | 2 | 1 | 2 | 1 |
| 56 | 2 | 1 | 2 | 1 |
| 57 | 2 | 1 | 2 | 1 |
| 58 | 2 | 1 | 2 | 1 |
| 59 | 2 | 1 | 2 | 1 |
| 60 | 2 | 1 | 2 | 1 |
|    | 2 | 1 | 2 | 1 |

|    |   |   |   |   |
|----|---|---|---|---|
| 1  |   |   |   |   |
| 2  | 2 | 1 | 2 | 1 |
| 3  | 2 | 1 | 2 | 1 |
| 4  | 2 | 1 | 2 | 1 |
| 5  | 2 | 1 | 2 | 1 |
| 6  | 2 | 1 | 2 | 1 |
| 7  | 2 | 1 | 2 | 1 |
| 8  | 2 | 1 | 2 | 1 |
| 9  | 2 | 1 | 2 | 1 |
| 10 | 2 | 1 | 2 | 1 |
| 11 | 2 | 1 | 2 | 1 |
| 12 | 2 | 1 | 2 | 1 |
| 13 | 2 | 1 | 2 | 1 |
| 14 | 2 | 1 | 1 | 1 |
| 15 | 2 | 1 | 2 | 1 |
| 16 | 2 | 1 | 2 | 1 |
| 17 | 2 | 1 | 2 | 1 |
| 18 | 2 | 1 | 2 | 1 |
| 19 | 2 | 1 | 2 | 1 |
| 20 | 2 | 1 | 2 | 1 |
| 21 | 2 | 1 | 2 | 1 |
| 22 | 2 | 1 | 1 | 1 |
| 23 | 2 | 1 | 2 | 1 |
| 24 | 2 | 1 | 2 | 1 |
| 25 | 2 | 1 | 2 | 1 |
| 26 | 2 | 1 | 2 | 1 |
| 27 | 2 | 1 | 1 | 1 |
| 28 | 2 | 1 | 2 | 1 |
| 29 | 2 | 2 | 2 | 1 |
| 30 | 2 | 1 | 1 | 1 |
| 31 | 2 | 1 | 2 | 1 |
| 32 | 2 | 1 | 1 | 1 |
| 33 | 2 | 1 | 2 | 1 |
| 34 | 2 | 1 | 2 | 1 |
| 35 | 2 | 1 | 1 | 1 |
| 36 | 2 | 1 | 2 | 1 |
| 37 | 2 | 1 | 2 | 1 |
| 38 | 2 | 1 | 2 | 1 |
| 39 | 2 | 1 | 2 | 1 |
| 40 | 2 | 1 | 2 | 1 |
| 41 | 2 | 1 | 2 | 1 |
| 42 | 2 | 1 | 2 | 1 |
| 43 | 2 | 1 | 2 | 1 |
| 44 | 2 | 1 | 2 | 2 |
| 45 | 2 | 1 | 2 | 1 |
| 46 | 2 | 2 | 2 | 1 |
| 47 | 2 | 1 | 2 | 2 |
| 48 | 2 | 1 | 2 | 1 |
| 49 | 2 | 1 | 2 | 2 |
| 50 | 2 | 1 | 2 | 1 |
| 51 | 2 | 2 | 2 | 2 |
| 52 | 2 | 1 | 2 | 1 |
| 53 | 2 | 1 | 2 | 1 |
| 54 | 2 | 1 | 2 | 1 |
| 55 | 1 | 1 | 1 | 1 |
| 56 | 1 | 1 | 2 | 2 |
| 57 | 2 | 1 | 2 | 1 |
| 58 | 2 | 2 | 2 | 1 |
| 59 | 2 | 1 | 2 | 2 |
| 60 | 2 | 1 | 2 | 1 |

For peer review only

|    |   |   |   |   |
|----|---|---|---|---|
| 1  |   |   |   |   |
| 2  | 2 | 1 | 2 | 1 |
| 3  | 2 | 1 | 2 | 1 |
| 4  | 1 | 1 | 2 | 1 |
| 5  | 2 | 1 | 2 | 2 |
| 6  | 2 | 1 | 2 | 1 |
| 7  | 2 | 1 | 2 | 1 |
| 8  | 1 | 1 | 1 | 1 |
| 9  | 1 | 2 | 2 | 2 |
| 10 | 2 | 2 | 2 | 1 |
| 11 | 2 | 1 | 2 | 2 |
| 12 | 1 | 1 | 2 | 1 |
| 13 | 1 | 1 | 2 | 2 |
| 14 | 1 | 1 | 2 | 1 |
| 15 | 1 | 1 | 2 | 1 |
| 16 | 2 | 1 | 2 | 1 |
| 17 | 1 | 1 | 2 | 1 |
| 18 | 1 | 1 | 2 | 1 |
| 19 | 2 | 1 | 2 | 2 |
| 20 | 2 | 1 | 2 | 2 |
| 21 | 2 | 1 | 2 | 2 |
| 22 | 2 | 1 | 2 | 1 |
| 23 | 2 | 1 | 2 | 1 |
| 24 | 1 | 1 | 2 | 1 |
| 25 | 2 | 1 | 2 | 1 |
| 26 | 2 | 1 | 2 | 1 |
| 27 | 2 | 1 | 2 | 1 |
| 28 | 2 | 1 | 2 | 1 |
| 29 | 2 | 2 | 2 | 1 |
| 30 | 1 | 1 | 2 | 1 |
| 31 | 2 | 1 | 2 | 1 |
| 32 | 2 | 1 | 2 | 1 |
| 33 | 2 | 1 | 2 | 1 |
| 34 | 1 | 1 | 2 | 1 |
| 35 | 2 | 2 | 2 | 1 |
| 36 | 2 | 1 | 2 | 1 |
| 37 | 1 | 1 | 2 | 2 |
| 38 | 2 | 1 | 2 | 1 |
| 39 | 2 | 1 | 2 | 1 |
| 40 | 2 | 1 | 2 | 1 |
| 41 | 2 | 1 | 2 | 1 |
| 42 | 2 | 1 | 2 | 2 |
| 43 | 2 | 1 | 2 | 2 |
| 44 | 2 | 1 | 2 | 1 |
| 45 | 2 | 1 | 2 | 2 |
| 46 | 2 | 1 | 2 | 2 |
| 47 | 2 | 1 | 2 | 2 |
| 48 | 2 | 2 | 1 | 1 |
| 49 | 2 | 1 | 1 | 1 |
| 50 | 2 | 1 | 2 | 1 |
| 51 | 2 | 1 | 1 | 1 |
| 52 | 2 | 1 | 2 | 1 |
| 53 | 1 | 1 | 1 | 1 |
| 54 | 2 | 1 | 2 | 1 |
| 55 | 1 | 2 | 1 | 1 |
| 56 | 2 | 2 | 2 | 1 |
| 57 | 1 | 2 | 1 | 1 |
| 58 | 2 | 2 | 2 | 1 |
| 59 | 1 | 1 | 2 | 1 |
| 60 | 2 | 1 | 2 | 1 |

|    |   |   |   |   |
|----|---|---|---|---|
| 1  |   |   |   |   |
| 2  | 2 | 1 | 2 | 1 |
| 3  | 2 | 1 | 2 | 1 |
| 4  | 2 | 1 | 2 | 1 |
| 5  | 2 | 1 | 2 | 1 |
| 6  | 2 | 1 | 2 | 1 |
| 7  | 2 | 1 | 2 | 1 |
| 8  | 2 | 1 | 2 | 1 |
| 9  | 2 | 1 | 2 | 1 |
| 10 | 2 | 1 | 2 | 1 |
| 11 | 2 | 1 | 2 | 1 |
| 12 | 2 | 1 | 2 | 1 |
| 13 | 2 | 1 | 2 | 1 |
| 14 | 2 | 1 | 2 | 1 |
| 15 | 2 | 1 | 2 | 1 |
| 16 | 2 | 1 | 2 | 2 |
| 17 | 2 | 1 | 1 | 1 |
| 18 | 2 | 1 | 2 | 1 |
| 19 | 2 | 1 | 2 | 1 |
| 20 | 2 | 1 | 1 | 1 |
| 21 | 2 | 1 | 1 | 2 |
| 22 | 2 | 2 | 2 | 1 |
| 23 | 2 | 2 | 2 | 1 |
| 24 | 2 | 2 | 2 | 1 |
| 25 | 2 | 2 | 2 | 1 |
| 26 | 2 | 1 | 2 | 1 |
| 27 | 2 | 1 | 2 | 1 |
| 28 | 2 | 1 | 2 | 1 |
| 29 | 1 | 1 | 2 | 1 |
| 30 | 2 | 2 | 2 | 1 |
| 31 | 2 | 2 | 2 | 1 |
| 32 | 2 | 2 | 2 | 1 |
| 33 | 1 | 1 | 2 | 1 |
| 34 | 1 | 1 | 2 | 1 |
| 35 | 2 | 1 | 2 | 2 |
| 36 | 2 | 1 | 2 | 2 |
| 37 | 1 | 1 | 1 | 2 |
| 38 | 2 | 1 | 2 | 1 |
| 39 | 2 | 1 | 2 | 2 |
| 40 | 1 | 1 | 2 | 2 |
| 41 | 2 | 1 | 2 | 2 |
| 42 | 1 | 1 | 2 | 1 |
| 43 | 1 | 1 | 2 | 1 |
| 44 | 2 | 1 | 2 | 1 |
| 45 | 2 | 1 | 2 | 1 |
| 46 | 2 | 1 | 1 | 1 |
| 47 | 2 | 2 | 1 | 1 |
| 48 | 1 | 1 | 2 | 1 |
| 49 | 1 | 1 | 2 | 1 |
| 50 | 1 | 1 | 2 | 1 |
| 51 | 2 | 1 | 1 | 1 |
| 52 | 2 | 1 | 2 | 1 |
| 53 | 2 | 1 | 1 | 1 |
| 54 | 1 | 1 | 2 | 1 |
| 55 | 2 | 1 | 2 | 1 |
| 56 | 1 | 2 | 1 | 2 |
| 57 | 2 | 1 | 2 | 1 |
| 58 | 1 | 2 | 1 | 2 |
| 59 | 2 | 1 | 1 | 1 |
| 60 | 1 | 1 | 1 | 2 |
|    | 1 | 2 | 2 | 2 |

For peer review only

|    |   |   |   |   |
|----|---|---|---|---|
| 1  |   |   |   |   |
| 2  | 1 | 2 | 2 | 2 |
| 3  | 2 | 1 | 2 | 1 |
| 4  | 2 | 1 | 2 | 1 |
| 5  | 1 | 1 | 2 | 1 |
| 6  | 1 | 1 | 2 | 2 |
| 7  | 2 | 1 | 2 | 1 |
| 8  | 2 | 1 | 2 | 1 |
| 9  | 2 | 1 | 2 | 1 |
| 10 | 2 | 1 | 2 | 1 |
| 11 | 2 | 1 | 2 | 1 |
| 12 | 2 | 1 | 2 | 1 |
| 13 | 2 | 1 | 2 | 1 |
| 14 | 1 | 1 | 1 | 2 |
| 15 | 2 | 1 | 2 | 1 |
| 16 | 2 | 1 | 2 | 1 |
| 17 | 2 | 1 | 2 | 1 |
| 18 | 2 | 2 | 1 | 1 |
| 19 | 2 | 1 | 2 | 1 |
| 20 | 2 | 1 | 2 | 1 |
| 21 | 2 | 1 | 2 | 1 |
| 22 | 2 | 1 | 2 | 1 |
| 23 | 1 | 1 | 1 | 1 |
| 24 | 2 | 1 | 1 | 1 |
| 25 | 2 | 1 | 2 | 1 |
| 26 | 2 | 1 | 2 | 1 |
| 27 | 2 | 1 | 2 | 1 |
| 28 | 1 | 1 | 1 | 1 |
| 29 | 1 | 1 | 2 | 1 |
| 30 | 1 | 1 | 2 | 1 |
| 31 | 1 | 1 | 1 | 2 |
| 32 | 2 | 1 | 1 | 1 |
| 33 | 2 | 1 | 2 | 1 |
| 34 | 2 | 1 | 2 | 1 |
| 35 | 2 | 1 | 2 | 1 |
| 36 | 2 | 1 | 2 | 1 |
| 37 | 2 | 1 | 2 | 1 |
| 38 | 2 | 1 | 2 | 1 |
| 39 | 2 | 1 | 2 | 1 |
| 40 | 2 | 1 | 1 | 1 |
| 41 | 2 | 1 | 2 | 2 |
| 42 | 2 | 2 | 1 | 1 |
| 43 | 2 | 1 | 2 | 1 |
| 44 | 2 | 1 | 2 | 1 |
| 45 | 2 | 1 | 1 | 1 |
| 46 | 2 | 1 | 2 | 1 |
| 47 | 2 | 1 | 2 | 1 |
| 48 | 1 | 1 | 2 | 1 |
| 49 | 2 | 1 | 2 | 1 |
| 50 | 1 | 1 | 2 | 1 |
| 51 | 2 | 1 | 1 | 1 |
| 52 | 1 | 1 | 2 | 1 |
| 53 | 2 | 1 | 1 | 1 |
| 54 | 1 | 1 | 2 | 1 |
| 55 | 1 | 1 | 1 | 1 |
| 56 | 1 | 1 | 2 | 1 |
| 57 | 2 | 1 | 2 | 1 |
| 58 | 2 | 1 | 1 | 1 |
| 59 | 2 | 1 | 2 | 1 |
| 60 | 1 | 2 | 1 | 2 |

|    |   |   |   |   |
|----|---|---|---|---|
| 1  |   |   |   |   |
| 2  | 2 | 1 | 2 | 1 |
| 3  | 2 | 1 | 1 | 1 |
| 4  | 2 | 1 | 2 | 1 |
| 5  | 2 | 1 | 2 | 1 |
| 6  | 2 | 2 | 1 | 1 |
| 7  | 2 | 1 | 1 | 1 |
| 8  | 1 | 1 | 1 | 1 |
| 9  | 2 | 1 | 2 | 1 |
| 10 | 2 | 1 | 2 | 1 |
| 11 | 1 | 1 | 1 | 1 |
| 12 | 2 | 1 | 2 | 1 |
| 13 | 2 | 1 | 2 | 1 |
| 14 | 1 | 1 | 2 | 1 |
| 15 | 2 | 1 | 2 | 1 |
| 16 | 1 | 2 | 2 | 1 |
| 17 | 2 | 1 | 1 | 1 |
| 18 | 2 | 1 | 1 | 1 |
| 19 | 2 | 1 | 1 | 1 |
| 20 | 1 | 1 | 2 | 1 |
| 21 | 2 | 1 | 2 | 2 |
| 22 | 2 | 1 | 1 | 1 |
| 23 | 2 | 1 | 2 | 2 |
| 24 | 2 | 1 | 2 | 1 |
| 25 | 2 | 2 | 2 | 1 |
| 26 | 2 | 2 | 2 | 1 |
| 27 | 2 | 2 | 2 | 1 |
| 28 | 2 | 1 | 2 | 1 |
| 29 | 2 | 1 | 2 | 1 |
| 30 | 2 | 1 | 2 | 1 |
| 31 | 2 | 1 | 2 | 1 |
| 32 | 2 | 1 | 2 | 1 |
| 33 | 2 | 1 | 1 | 1 |
| 34 | 1 | 1 | 2 | 1 |
| 35 | 2 | 1 | 1 | 1 |
| 36 | 2 | 2 | 2 | 1 |
| 37 | 2 | 1 | 2 | 1 |
| 38 | 2 | 1 | 2 | 1 |
| 39 | 2 | 1 | 2 | 1 |
| 40 | 1 | 2 | 1 | 1 |
| 41 | 2 | 1 | 2 | 1 |
| 42 | 2 | 1 | 1 | 1 |
| 43 | 2 | 2 | 2 | 1 |
| 44 | 2 | 1 | 2 | 1 |
| 45 | 2 | 1 | 2 | 1 |
| 46 | 2 | 1 | 2 | 1 |
| 47 | 2 | 1 | 2 | 1 |
| 48 | 2 | 1 | 2 | 1 |
| 49 | 2 | 1 | 2 | 1 |
| 50 | 2 | 1 | 1 | 2 |
| 51 | 2 | 1 | 1 | 1 |
| 52 | 2 | 1 | 2 | 1 |
| 53 | 2 | 2 | 2 | 1 |
| 54 | 2 | 1 | 2 | 1 |
| 55 | 2 | 2 | 1 | 1 |
| 56 | 2 | 1 | 1 | 2 |
| 57 | 2 | 1 | 2 | 2 |
| 58 | 2 | 1 | 2 | 1 |
| 59 | 2 | 1 | 2 | 1 |
| 60 | 2 | 1 | 2 | 1 |

For peer review only

|    |   |   |   |   |
|----|---|---|---|---|
| 1  |   |   |   |   |
| 2  | 2 | 1 | 2 | 1 |
| 3  | 2 | 1 | 2 | 2 |
| 4  | 1 | 2 | 2 | 1 |
| 5  | 2 | 1 | 2 | 1 |
| 6  | 2 | 1 | 2 | 1 |
| 7  | 2 | 1 | 2 | 1 |
| 8  | 2 | 1 | 2 | 1 |
| 9  | 2 | 1 | 2 | 2 |
| 10 | 2 | 2 | 2 | 1 |
| 11 | 1 | 2 | 2 | 1 |
| 12 | 2 | 2 | 2 | 1 |
| 13 | 2 | 2 | 2 | 1 |
| 14 | 2 | 1 | 2 | 1 |
| 15 | 2 | 1 | 2 | 1 |
| 16 | 2 | 1 | 2 | 2 |
| 17 | 2 | 1 | 2 | 1 |
| 18 | 2 | 1 | 2 | 2 |
| 19 | 2 | 1 | 2 | 2 |
| 20 | 2 | 1 | 1 | 1 |
| 21 | 2 | 1 | 2 | 2 |
| 22 | 2 | 1 | 2 | 2 |
| 23 | 2 | 1 | 2 | 1 |
| 24 | 2 | 1 | 2 | 2 |
| 25 | 2 | 1 | 2 | 2 |
| 26 | 2 | 2 | 2 | 2 |
| 27 | 2 | 1 | 2 | 1 |
| 28 | 2 | 1 | 2 | 2 |
| 29 | 2 | 1 | 2 | 1 |
| 30 | 2 | 1 | 2 | 1 |
| 31 | 2 | 1 | 2 | 1 |
| 32 | 2 | 1 | 2 | 1 |
| 33 | 2 | 1 | 2 | 1 |
| 34 | 1 | 1 | 1 | 1 |
| 35 | 2 | 1 | 2 | 2 |
| 36 | 2 | 1 | 2 | 2 |
| 37 | 2 | 1 | 2 | 2 |
| 38 | 1 | 2 | 2 | 1 |
| 39 | 2 | 1 | 2 | 1 |
| 40 | 2 | 1 | 2 | 1 |
| 41 | 2 | 1 | 2 | 1 |
| 42 | 2 | 1 | 2 | 1 |
| 43 | 1 | 1 | 2 | 1 |
| 44 | 2 | 1 | 2 | 1 |
| 45 | 2 | 1 | 2 | 1 |
| 46 | 2 | 1 | 2 | 2 |
| 47 | 2 | 1 | 2 | 1 |
| 48 | 2 | 1 | 2 | 1 |
| 49 | 2 | 1 | 2 | 1 |
| 50 | 2 | 1 | 2 | 1 |
| 51 | 2 | 1 | 2 | 1 |
| 52 | 2 | 1 | 2 | 1 |
| 53 | 2 | 1 | 2 | 1 |
| 54 | 2 | 1 | 2 | 1 |
| 55 | 2 | 1 | 2 | 1 |
| 56 | 2 | 1 | 2 | 1 |
| 57 | 2 | 1 | 1 | 1 |
| 58 | 2 | 1 | 2 | 2 |
| 59 | 2 | 1 | 2 | 1 |
| 60 | 2 | 1 | 1 | 1 |



|    |   |   |   |   |
|----|---|---|---|---|
| 1  |   |   |   |   |
| 2  | 2 | 2 | 2 | 1 |
| 3  | 2 | 1 | 2 | 1 |
| 4  | 2 | 1 | 1 | 1 |
| 5  | 2 | 2 | 2 | 2 |
| 6  | 2 | 1 | 2 | 1 |
| 7  | 2 | 1 | 2 | 1 |
| 8  | 1 | 1 | 2 | 1 |
| 9  | 2 | 1 | 2 | 1 |
| 10 | 2 | 1 | 2 | 1 |
| 11 | 1 | 2 | 2 | 1 |
| 12 | 1 | 1 | 2 | 1 |
| 13 | 2 | 1 | 2 | 1 |
| 14 | 2 | 1 | 2 | 2 |
| 15 | 2 | 1 | 2 | 1 |
| 16 | 2 | 1 | 2 | 1 |
| 17 | 1 | 1 | 2 | 1 |
| 18 | 2 | 1 | 2 | 1 |
| 19 | 2 | 2 | 2 | 1 |
| 20 | 2 | 1 | 2 | 1 |
| 21 | 1 | 1 | 2 | 1 |
| 22 | 1 | 1 | 2 | 1 |
| 23 | 1 | 1 | 2 | 1 |
| 24 | 1 | 1 | 2 | 1 |
| 25 | 2 | 1 | 1 | 1 |
| 26 | 2 | 1 | 2 | 1 |
| 27 | 2 | 1 | 2 | 2 |
| 28 | 2 | 1 | 2 | 1 |
| 29 | 2 | 1 | 2 | 1 |
| 30 | 1 | 1 | 2 | 1 |
| 31 | 2 | 1 | 2 | 1 |
| 32 | 2 | 1 | 1 | 1 |
| 33 | 2 | 1 | 2 | 1 |
| 34 | 2 | 1 | 2 | 1 |
| 35 | 1 | 1 | 1 | 1 |
| 36 | 2 | 2 | 1 | 1 |
| 37 | 2 | 2 | 2 | 1 |
| 38 | 2 | 1 | 2 | 1 |
| 39 | 1 | 1 | 2 | 1 |
| 40 | 2 | 1 | 2 | 1 |
| 41 | 2 | 2 | 2 | 1 |
| 42 | 2 | 1 | 2 | 1 |
| 43 | 2 | 2 | 2 | 1 |
| 44 | 2 | 1 | 2 | 1 |
| 45 | 2 | 2 | 2 | 1 |
| 46 | 2 | 1 | 2 | 1 |
| 47 | 1 | 1 | 2 | 1 |
| 48 | 2 | 1 | 2 | 1 |
| 49 | 1 | 1 | 2 | 1 |
| 50 | 2 | 1 | 2 | 1 |
| 51 | 2 | 1 | 2 | 1 |
| 52 | 2 | 1 | 2 | 1 |
| 53 | 2 | 2 | 2 | 2 |
| 54 | 2 | 1 | 1 | 1 |
| 55 | 2 | 1 | 2 | 1 |
| 56 | 2 | 1 | 2 | 1 |
| 57 | 2 | 1 | 2 | 1 |
| 58 | 2 | 1 | 2 | 1 |
| 59 | 2 | 1 | 2 | 1 |
| 60 | 1 | 2 | 2 | 1 |

For peer review only

|    |   |   |   |   |
|----|---|---|---|---|
| 1  |   |   |   |   |
| 2  | 2 | 1 | 2 | 1 |
| 3  | 2 | 1 | 1 | 1 |
| 4  | 2 | 1 | 2 | 1 |
| 5  | 2 | 1 | 2 | 1 |
| 6  | 2 | 2 | 2 | 1 |
| 7  | 2 | 1 | 2 | 1 |
| 8  | 2 | 1 | 2 | 1 |
| 9  | 2 | 1 | 2 | 1 |
| 10 | 2 | 2 | 2 | 1 |
| 11 | 2 | 1 | 2 | 1 |
| 12 | 1 | 1 | 2 | 1 |
| 13 | 2 | 1 | 2 | 1 |
| 14 | 2 | 1 | 2 | 1 |
| 15 | 2 | 1 | 2 | 1 |
| 16 | 1 | 1 | 2 | 1 |
| 17 | 1 | 2 | 1 | 1 |
| 18 | 1 | 1 | 2 | 1 |
| 19 | 2 | 1 | 2 | 1 |
| 20 | 1 | 1 | 2 | 1 |
| 21 | 1 | 1 | 2 | 1 |
| 22 | 1 | 1 | 2 | 1 |
| 23 | 1 | 1 | 2 | 1 |
| 24 | 1 | 1 | 2 | 1 |
| 25 | 1 | 1 | 2 | 1 |
| 26 | 1 | 1 | 2 | 1 |
| 27 | 1 | 1 | 2 | 1 |
| 28 | 2 | 1 | 2 | 1 |
| 29 | 2 | 1 | 2 | 2 |
| 30 | 1 | 1 | 2 | 1 |
| 31 | 2 | 1 | 1 | 1 |
| 32 | 2 | 2 | 2 | 2 |
| 33 | 2 | 2 | 2 | 2 |
| 34 | 2 | 1 | 1 | 1 |
| 35 | 2 | 1 | 2 | 1 |
| 36 | 1 | 2 | 2 | 1 |
| 37 | 2 | 1 | 2 | 1 |
| 38 | 2 | 1 | 2 | 1 |
| 39 | 2 | 1 | 2 | 1 |
| 40 | 2 | 1 | 2 | 1 |
| 41 | 2 | 2 | 2 | 2 |
| 42 | 2 | 1 | 2 | 1 |
| 43 | 1 | 2 | 2 | 2 |
| 44 | 2 | 1 | 2 | 1 |
| 45 | 2 | 1 | 2 | 1 |
| 46 | 2 | 1 | 2 | 2 |
| 47 | 1 | 1 | 2 | 1 |
| 48 | 1 | 1 | 2 | 1 |
| 49 | 2 | 1 | 2 | 2 |
| 50 | 2 | 1 | 2 | 1 |
| 51 | 2 | 1 | 2 | 1 |
| 52 | 2 | 1 | 2 | 1 |
| 53 | 1 | 1 | 2 | 2 |
| 54 | 2 | 1 | 2 | 1 |
| 55 | 2 | 1 | 2 | 1 |
| 56 | 2 | 1 | 2 | 1 |
| 57 | 1 | 1 | 2 | 1 |
| 58 | 2 | 1 | 2 | 1 |
| 59 | 2 | 1 | 1 | 1 |
| 60 | 2 | 1 | 2 | 1 |

|    |   |   |   |   |
|----|---|---|---|---|
| 1  |   |   |   |   |
| 2  | 1 | 1 | 2 | 1 |
| 3  | 1 | 1 | 2 | 1 |
| 4  | 2 | 1 | 2 | 1 |
| 5  | 2 | 2 | 2 | 1 |
| 6  | 2 | 1 | 2 | 1 |
| 7  | 2 | 1 | 1 | 1 |
| 8  | 2 | 2 | 1 | 1 |
| 9  | 2 | 1 | 2 | 1 |
| 10 | 2 | 2 | 2 | 1 |
| 11 | 2 | 1 | 2 | 1 |
| 12 | 2 | 1 | 2 | 1 |
| 13 | 2 | 1 | 2 | 1 |
| 14 | 2 | 1 | 2 | 1 |
| 15 | 1 | 1 | 2 | 1 |
| 16 | 1 | 1 | 2 | 1 |
| 17 | 2 | 1 | 2 | 1 |
| 18 | 2 | 1 | 2 | 1 |
| 19 | 2 | 1 | 2 | 2 |
| 20 | 2 | 1 | 2 | 1 |
| 21 | 2 | 1 | 2 | 2 |
| 22 | 2 | 2 | 2 | 1 |
| 23 | 1 | 1 | 1 | 2 |
| 24 | 2 | 1 | 2 | 1 |
| 25 | 1 | 1 | 2 | 1 |
| 26 | 2 | 1 | 2 | 1 |
| 27 | 2 | 1 | 2 | 1 |
| 28 | 2 | 1 | 2 | 1 |
| 29 | 2 | 2 | 2 | 1 |
| 30 | 1 | 2 | 1 | 1 |
| 31 | 1 | 1 | 2 | 1 |
| 32 | 2 | 2 | 2 | 1 |
| 33 | 2 | 2 | 2 | 1 |
| 34 | 2 | 2 | 2 | 1 |
| 35 | 1 | 1 | 2 | 1 |
| 36 | 2 | 1 | 2 | 1 |
| 37 | 2 | 1 | 2 | 1 |
| 38 | 2 | 1 | 2 | 1 |
| 39 | 2 | 1 | 2 | 1 |
| 40 | 2 | 1 | 2 | 1 |
| 41 | 2 | 1 | 2 | 1 |
| 42 | 2 | 1 | 1 | 1 |
| 43 | 2 | 1 | 2 | 1 |
| 44 | 2 | 1 | 2 | 1 |
| 45 | 2 | 1 | 2 | 1 |
| 46 | 2 | 1 | 2 | 1 |
| 47 | 2 | 1 | 1 | 1 |
| 48 | 2 | 2 | 1 | 1 |
| 49 | 1 | 1 | 2 | 1 |
| 50 | 2 | 1 | 2 | 1 |
| 51 | 2 | 1 | 2 | 1 |
| 52 | 2 | 1 | 2 | 1 |
| 53 | 2 | 1 | 2 | 1 |
| 54 | 1 | 1 | 2 | 1 |
| 55 | 2 | 1 | 1 | 1 |
| 56 | 2 | 1 | 2 | 1 |
| 57 | 2 | 2 | 1 | 1 |
| 58 | 2 | 2 | 1 | 1 |
| 59 | 2 | 2 | 2 | 1 |
| 60 | 2 | 1 | 2 | 1 |

For peer review only

|    |   |   |   |   |
|----|---|---|---|---|
| 1  |   |   |   |   |
| 2  | 2 | 1 | 2 | 1 |
| 3  | 2 | 1 | 2 | 1 |
| 4  | 2 | 1 | 2 | 2 |
| 5  | 2 | 1 | 2 | 1 |
| 6  | 2 | 1 | 2 | 2 |
| 7  | 2 | 1 | 2 | 2 |
| 8  | 2 | 1 | 2 | 2 |
| 9  | 1 | 1 | 2 | 1 |
| 10 | 1 | 2 | 2 | 1 |
| 11 | 2 | 1 | 2 | 1 |
| 12 | 2 | 1 | 2 | 1 |
| 13 | 2 | 1 | 2 | 1 |
| 14 | 2 | 1 | 2 | 1 |
| 15 | 2 | 1 | 2 | 1 |
| 16 | 2 | 1 | 2 | 1 |
| 17 | 2 | 1 | 2 | 1 |
| 18 | 2 | 2 | 2 | 1 |
| 19 | 2 | 2 | 2 | 1 |
| 20 | 2 | 1 | 1 | 1 |
| 21 | 2 | 2 | 2 | 1 |
| 22 | 2 | 1 | 2 | 1 |
| 23 | 2 | 2 | 2 | 1 |
| 24 | 2 | 2 | 2 | 1 |
| 25 | 2 | 1 | 2 | 1 |
| 26 | 2 | 1 | 2 | 1 |
| 27 | 2 | 1 | 2 | 1 |
| 28 | 2 | 1 | 2 | 1 |
| 29 | 2 | 1 | 2 | 1 |
| 30 | 2 | 1 | 2 | 1 |
| 31 | 2 | 2 | 2 | 2 |
| 32 | 2 | 2 | 2 | 1 |
| 33 | 1 | 1 | 2 | 1 |
| 34 | 2 | 1 | 1 | 2 |
| 35 | 2 | 2 | 2 | 1 |
| 36 | 2 | 2 | 2 | 1 |
| 37 | 2 | 1 | 2 | 1 |
| 38 | 2 | 1 | 2 | 1 |
| 39 | 2 | 2 | 2 | 1 |
| 40 | 2 | 2 | 2 | 1 |
| 41 | 2 | 2 | 2 | 1 |
| 42 | 2 | 2 | 2 | 1 |
| 43 | 2 | 1 | 2 | 1 |
| 44 | 2 | 2 | 2 | 1 |
| 45 | 2 | 1 | 2 | 1 |
| 46 | 2 | 1 | 2 | 1 |
| 47 | 2 | 1 | 1 | 1 |
| 48 | 2 | 1 | 1 | 1 |
| 49 | 2 | 2 | 2 | 1 |
| 50 | 2 | 1 | 2 | 1 |
| 51 | 2 | 1 | 2 | 1 |
| 52 | 2 | 1 | 2 | 1 |
| 53 | 2 | 1 | 2 | 1 |
| 54 | 2 | 2 | 2 | 1 |
| 55 | 2 | 2 | 1 | 1 |
| 56 | 2 | 2 | 2 | 1 |
| 57 | 2 | 2 | 2 | 1 |
| 58 | 2 | 2 | 2 | 1 |
| 59 | 2 | 2 | 2 | 1 |
| 60 | 2 | 1 | 2 | 1 |
|    | 2 | 2 | 2 | 1 |

For peer review only

|    |   |   |   |   |
|----|---|---|---|---|
| 1  |   |   |   |   |
| 2  | 2 | 1 | 1 | 2 |
| 3  | 2 | 1 | 2 | 1 |
| 4  | 2 | 2 | 2 | 1 |
| 5  | 2 | 1 | 2 | 1 |
| 6  | 2 | 1 | 2 | 1 |
| 7  | 2 | 1 | 2 | 1 |
| 8  | 1 | 1 | 2 | 1 |
| 9  | 2 | 1 | 2 | 2 |
| 10 | 1 | 1 | 2 | 1 |
| 11 | 2 | 1 | 2 | 1 |
| 12 | 1 | 1 | 2 | 1 |
| 13 | 2 | 2 | 2 | 1 |
| 14 | 2 | 1 | 2 | 1 |
| 15 | 2 | 1 | 2 | 1 |
| 16 | 2 | 1 | 2 | 1 |
| 17 | 2 | 1 | 1 | 1 |
| 18 | 2 | 1 | 2 | 1 |
| 19 | 2 | 1 | 2 | 2 |
| 20 | 2 | 1 | 1 | 1 |
| 21 | 2 | 1 | 2 | 1 |
| 22 | 2 | 1 | 1 | 1 |
| 23 | 2 | 1 | 2 | 1 |
| 24 | 2 | 1 | 2 | 1 |
| 25 | 2 | 1 | 2 | 1 |
| 26 | 2 | 1 | 1 | 1 |
| 27 | 2 | 1 | 2 | 1 |
| 28 | 2 | 1 | 2 | 2 |
| 29 | 2 | 1 | 2 | 1 |
| 30 | 2 | 1 | 2 | 1 |
| 31 | 2 | 1 | 2 | 1 |
| 32 | 2 | 1 | 2 | 2 |
| 33 | 2 | 1 | 2 | 1 |
| 34 | 2 | 1 | 2 | 1 |
| 35 | 2 | 2 | 1 | 1 |
| 36 | 2 | 1 | 2 | 1 |
| 37 | 2 | 1 | 2 | 1 |
| 38 | 2 | 1 | 2 | 1 |
| 39 | 2 | 1 | 2 | 1 |
| 40 | 2 | 1 | 2 | 1 |
| 41 | 2 | 1 | 1 | 1 |
| 42 | 2 | 1 | 2 | 1 |
| 43 | 2 | 1 | 2 | 1 |
| 44 | 2 | 2 | 2 | 1 |
| 45 | 2 | 1 | 2 | 1 |
| 46 | 2 | 1 | 1 | 1 |
| 47 | 2 | 1 | 2 | 1 |
| 48 | 2 | 1 | 2 | 1 |
| 49 | 2 | 1 | 2 | 1 |
| 50 | 2 | 1 | 2 | 1 |
| 51 | 2 | 1 | 2 | 1 |
| 52 | 2 | 2 | 2 | 1 |
| 53 | 2 | 1 | 2 | 1 |
| 54 | 2 | 1 | 2 | 1 |
| 55 | 2 | 1 | 2 | 2 |
| 56 | 2 | 1 | 2 | 1 |
| 57 | 2 | 1 | 2 | 1 |
| 58 | 2 | 2 | 2 | 1 |
| 59 | 2 | 1 | 2 | 1 |
| 60 | 2 | 1 | 1 | 1 |

For peer review only

|    |   |   |   |   |
|----|---|---|---|---|
| 1  |   |   |   |   |
| 2  | 2 | 2 | 2 | 1 |
| 3  | 2 | 1 | 2 | 1 |
| 4  | 2 | 1 | 2 | 1 |
| 5  | 2 | 1 | 2 | 1 |
| 6  | 2 | 1 | 1 | 1 |
| 7  | 2 | 1 | 2 | 1 |
| 8  | 2 | 1 | 2 | 1 |
| 9  | 2 | 1 | 2 | 1 |
| 10 | 2 | 1 | 2 | 1 |
| 11 | 2 | 1 | 2 | 1 |
| 12 | 2 | 2 | 2 | 1 |
| 13 | 2 | 2 | 2 | 1 |
| 14 | 2 | 1 | 2 | 1 |
| 15 | 2 | 1 | 2 | 1 |
| 16 | 2 | 1 | 2 | 1 |
| 17 | 2 | 1 | 2 | 1 |
| 18 | 2 | 1 | 2 | 1 |
| 19 | 2 | 1 | 2 | 1 |
| 20 | 2 | 1 | 2 | 1 |
| 21 | 2 | 1 | 2 | 1 |
| 22 | 2 | 1 | 2 | 1 |
| 23 | 2 | 1 | 2 | 1 |
| 24 | 2 | 1 | 2 | 1 |
| 25 | 2 | 2 | 2 | 1 |
| 26 | 2 | 1 | 1 | 2 |
| 27 | 2 | 1 | 2 | 1 |
| 28 | 2 | 1 | 2 | 1 |
| 29 | 2 | 1 | 2 | 1 |
| 30 | 2 | 1 | 2 | 1 |
| 31 | 2 | 1 | 2 | 1 |
| 32 | 2 | 1 | 2 | 1 |
| 33 | 2 | 1 | 2 | 2 |
| 34 | 2 | 1 | 2 | 1 |
| 35 | 2 | 1 | 2 | 1 |
| 36 | 2 | 1 | 2 | 1 |
| 37 | 2 | 1 | 1 | 1 |
| 38 | 2 | 2 | 2 | 1 |
| 39 | 2 | 1 | 2 | 1 |
| 40 | 2 | 2 | 2 | 1 |
| 41 | 1 | 1 | 2 | 1 |
| 42 | 2 | 1 | 2 | 1 |
| 43 | 2 | 1 | 2 | 1 |
| 44 | 2 | 1 | 1 | 2 |
| 45 | 2 | 2 | 2 | 1 |
| 46 | 2 | 1 | 2 | 1 |
| 47 | 2 | 1 | 2 | 1 |
| 48 | 2 | 1 | 2 | 1 |
| 49 | 2 | 1 | 1 | 2 |
| 50 | 2 | 1 | 2 | 1 |
| 51 | 2 | 2 | 2 | 2 |
| 52 | 2 | 2 | 2 | 1 |
| 53 | 2 | 1 | 2 | 1 |
| 54 | 2 | 1 | 2 | 1 |
| 55 | 2 | 1 | 2 | 1 |
| 56 | 1 | 1 | 2 | 1 |
| 57 | 2 | 1 | 2 | 1 |
| 58 | 2 | 1 | 2 | 1 |
| 59 | 2 | 1 | 2 | 1 |
| 60 | 2 | 1 | 2 | 1 |
|    | 2 | 1 | 2 | 1 |

|    |   |   |   |   |
|----|---|---|---|---|
| 1  |   |   |   |   |
| 2  | 2 | 1 | 2 | 1 |
| 3  | 1 | 1 | 2 | 1 |
| 4  | 2 | 1 | 2 | 1 |
| 5  | 2 | 1 | 2 | 1 |
| 6  | 2 | 1 | 2 | 1 |
| 7  | 2 | 1 | 2 | 1 |
| 8  | 2 | 1 | 2 | 1 |
| 9  | 2 | 1 | 2 | 1 |
| 10 | 2 | 1 | 1 | 2 |
| 11 | 2 | 1 | 2 | 1 |
| 12 | 2 | 1 | 2 | 1 |
| 13 | 2 | 1 | 2 | 1 |
| 14 | 1 | 1 | 2 | 2 |
| 15 | 2 | 1 | 2 | 2 |
| 16 | 2 | 1 | 2 | 1 |
| 17 | 2 | 1 | 2 | 1 |
| 18 | 2 | 1 | 2 | 1 |
| 19 | 2 | 1 | 2 | 1 |
| 20 | 2 | 1 | 2 | 1 |
| 21 | 1 | 1 | 2 | 1 |
| 22 | 1 | 1 | 2 | 1 |
| 23 | 1 | 1 | 2 | 1 |
| 24 | 1 | 1 | 2 | 1 |
| 25 | 1 | 1 | 2 | 2 |
| 26 | 1 | 1 | 1 | 2 |
| 27 | 2 | 1 | 2 | 1 |
| 28 | 1 | 1 | 2 | 1 |
| 29 | 2 | 1 | 2 | 2 |
| 30 | 1 | 1 | 2 | 1 |
| 31 | 2 | 1 | 2 | 1 |
| 32 | 1 | 1 | 2 | 1 |
| 33 | 2 | 1 | 2 | 1 |
| 34 | 2 | 1 | 2 | 1 |
| 35 | 2 | 1 | 2 | 1 |
| 36 | 2 | 2 | 2 | 1 |
| 37 | 1 | 1 | 2 | 1 |
| 38 | 1 | 2 | 2 | 1 |
| 39 | 1 | 1 | 1 | 2 |
| 40 | 2 | 1 | 2 | 1 |
| 41 | 2 | 1 | 2 | 1 |
| 42 | 2 | 1 | 2 | 1 |
| 43 | 2 | 1 | 2 | 2 |
| 44 | 2 | 1 | 2 | 1 |
| 45 | 2 | 1 | 2 | 1 |
| 46 | 1 | 1 | 2 | 1 |
| 47 | 2 | 1 | 2 | 2 |
| 48 | 2 | 1 | 2 | 1 |
| 49 | 2 | 1 | 2 | 1 |
| 50 | 2 | 1 | 2 | 1 |
| 51 | 2 | 1 | 2 | 1 |
| 52 | 2 | 2 | 2 | 1 |
| 53 | 1 | 2 | 2 | 1 |
| 54 | 2 | 1 | 2 | 1 |
| 55 | 1 | 2 | 2 | 1 |
| 56 | 2 | 1 | 2 | 1 |
| 57 | 2 | 1 | 2 | 2 |
| 58 | 2 | 1 | 2 | 1 |
| 59 | 1 | 1 | 2 | 1 |
| 60 | 1 | 1 | 2 | 1 |

For peer review only

|    |   |   |   |   |
|----|---|---|---|---|
| 1  |   |   |   |   |
| 2  | 2 | 1 | 2 | 1 |
| 3  | 1 | 1 | 2 | 2 |
| 4  | 2 | 1 | 2 | 1 |
| 5  | 2 | 1 | 2 | 2 |
| 6  | 2 | 1 | 2 | 1 |
| 7  | 2 | 1 | 2 | 1 |
| 8  | 2 | 1 | 1 | 1 |
| 9  | 1 | 1 | 2 | 2 |
| 10 | 2 | 1 | 2 | 1 |
| 11 | 2 | 1 | 2 | 1 |
| 12 | 2 | 1 | 2 | 1 |
| 13 | 2 | 1 | 2 | 1 |
| 14 | 2 | 1 | 2 | 1 |
| 15 | 1 | 1 | 2 | 1 |
| 16 | 2 | 1 | 2 | 1 |
| 17 | 1 | 1 | 2 | 1 |
| 18 | 1 | 1 | 2 | 2 |
| 19 | 1 | 1 | 2 | 2 |
| 20 | 1 | 1 | 2 | 2 |
| 21 | 1 | 1 | 2 | 1 |
| 22 | 2 | 2 | 2 | 1 |
| 23 | 1 | 1 | 2 | 1 |
| 24 | 1 | 1 | 1 | 1 |
| 25 | 2 | 1 | 2 | 1 |
| 26 | 2 | 1 | 2 | 1 |
| 27 | 2 | 1 | 2 | 1 |
| 28 | 1 | 1 | 1 | 1 |
| 29 | 2 | 1 | 2 | 1 |
| 30 | 1 | 1 | 2 | 2 |
| 31 | 2 | 1 | 2 | 1 |
| 32 | 1 | 1 | 2 | 1 |
| 33 | 1 | 2 | 2 | 2 |
| 34 | 1 | 1 | 1 | 2 |
| 35 | 1 | 2 | 2 | 1 |
| 36 | 1 | 1 | 2 | 2 |
| 37 | 1 | 1 | 2 | 1 |
| 38 | 1 | 1 | 2 | 2 |
| 39 | 1 | 1 | 2 | 1 |
| 40 | 1 | 1 | 2 | 1 |
| 41 | 1 | 1 | 2 | 1 |
| 42 | 1 | 1 | 2 | 1 |
| 43 | 2 | 1 | 1 | 2 |
| 44 | 2 | 1 | 2 | 1 |
| 45 | 2 | 1 | 2 | 1 |
| 46 | 2 | 1 | 2 | 1 |
| 47 | 2 | 1 | 1 | 1 |
| 48 | 2 | 1 | 1 | 1 |
| 49 | 2 | 1 | 2 | 1 |
| 50 | 2 | 2 | 2 | 1 |
| 51 | 2 | 2 | 2 | 2 |
| 52 | 2 | 1 | 2 | 1 |
| 53 | 2 | 1 | 2 | 1 |
| 54 | 2 | 1 | 2 | 1 |
| 55 | 1 | 1 | 2 | 1 |
| 56 | 1 | 1 | 2 | 1 |
| 57 | 1 | 1 | 2 | 1 |
| 58 | 1 | 1 | 2 | 1 |
| 59 | 1 | 1 | 2 | 1 |
| 60 | 2 | 1 | 2 | 1 |



1  
2  
3  
4  
5  
6  
7  
8  
9  
10  
11  
12  
13  
14  
15  
16  
17  
18  
19  
20  
21  
22  
23  
24  
25  
26  
27  
28  
29  
30  
31  
32  
33  
34  
35  
36  
37  
38  
39  
40  
41  
42  
43  
44  
45  
46  
47  
48  
49  
50  
51  
52  
53  
54  
55  
56  
57  
58  
59  
60

|  |   |   |   |   |
|--|---|---|---|---|
|  | 2 | 1 | 2 | 1 |
|  | 2 | 1 | 2 | 2 |

For peer review only

|    | Q75_self_foot_exam | HTN | Q53_DRetin | Q54_DNeph |
|----|--------------------|-----|------------|-----------|
| 1  |                    |     |            |           |
| 2  |                    |     |            |           |
| 3  |                    |     |            |           |
| 4  | 2                  | 1   | 1          | 2         |
| 5  | 1                  | 2   | 2          | 2         |
| 6  | 2                  | 2   | 2          | 2         |
| 7  | 2                  | 2   | 2          | 2         |
| 8  | 1                  | 1   | 2          | 2         |
| 9  | 1                  | 2   | 2          | 2         |
| 10 | 1                  | 2   | 2          | 2         |
| 11 | 2                  | 1   | 2          | 2         |
| 12 | 2                  | 2   | 1          | 2         |
| 13 | 1                  | 1   | 2          | 2         |
| 14 | 1                  | 2   | 2          | 2         |
| 15 | 1                  | 2   | 1          | 1         |
| 16 | 2                  | 1   | 1          | 2         |
| 17 | 2                  | 2   | 1          | 2         |
| 18 | 2                  | 2   | 1          | 2         |
| 19 | 1                  | 1   | 1          | 2         |
| 20 | 2                  | 2   | 1          | 1         |
| 21 | 1                  | 2   | 2          | 2         |
| 22 | 2                  | 2   | 2          | 2         |
| 23 | 2                  | 2   | 2          | 2         |
| 24 | 2                  | 2   | 1          | 2         |
| 25 | 2                  | 2   | 2          | 2         |
| 26 | 2                  | 2   | 2          | 2         |
| 27 | 2                  | 2   | 1          | 1         |
| 28 | 2                  | 2   | 1          | 1         |
| 29 | 2                  | 2   | 2          | 2         |
| 30 | 2                  | 2   | 1          | 2         |
| 31 | 1                  | 2   | 1          | 2         |
| 32 | 1                  | 2   | 2          | 2         |
| 33 | 1                  | 2   | 2          | 2         |
| 34 | 1                  | 2   | 2          | 2         |
| 35 | 2                  | 2   | 2          | 2         |
| 36 | 1                  | 2   | 2          | 2         |
| 37 | 1                  | 2   | 1          | 2         |
| 38 | 2                  | 2   | 2          | 2         |
| 39 | 1                  | 2   | 2          | 2         |
| 40 | 2                  | 2   | 2          | 2         |
| 41 | 1                  | 2   | 2          | 2         |
| 42 | 2                  | 2   | 2          | 2         |
| 43 | 2                  | 2   | 2          | 2         |
| 44 | 1                  | 2   | 2          | 2         |
| 45 | 2                  | 1   | 2          | 2         |
| 46 | 2                  | 2   | 2          | 2         |
| 47 | 2                  | 1   | 2          | 2         |
| 48 | 2                  | 2   | 2          | 2         |
| 49 | 1                  | 2   | 1          | 1         |
| 50 | 2                  | 2   | 2          | 2         |
| 51 | 2                  | 2   | 2          | 2         |
| 52 | 2                  | 2   | 2          | 2         |
| 53 | 2                  | 1   | 1          | 2         |
| 54 | 1                  | 1   | 2          | 2         |
| 55 | 2                  | 2   | 1          | 2         |
| 56 | 1                  | 1   | 2          | 2         |
| 57 | 2                  | 2   | 1          | 1         |
| 58 | 1                  | 2   | 1          | 2         |
| 59 | 2                  | 2   | 1          | 2         |
| 60 | 2                  | 1   | 1          | 2         |

|    |   |   |   |   |
|----|---|---|---|---|
| 1  |   |   |   |   |
| 2  | 2 | 1 | 1 | 2 |
| 3  | 1 | 2 | 1 | 2 |
| 4  | 2 | 2 | 2 | 2 |
| 5  | 2 | 1 | 2 | 2 |
| 6  | 1 | 2 | 2 | 1 |
| 7  | 2 | 2 | 2 | 2 |
| 8  | 2 | 2 | 2 | 2 |
| 9  | 2 | 2 | 2 | 2 |
| 10 | 1 | 2 | 2 | 2 |
| 11 | 1 | 2 | 2 | 2 |
| 12 | 2 | 1 | 1 | 2 |
| 13 | 2 | 2 | 1 | 2 |
| 14 | 1 | 2 | 2 | 2 |
| 15 | 2 | 2 | 2 | 2 |
| 16 | 2 | 2 | 2 | 2 |
| 17 | 1 | 2 | 2 | 2 |
| 18 | 2 | 1 | 2 | 1 |
| 19 | 2 | 2 | 1 | 2 |
| 20 | 2 | 2 | 2 | 2 |
| 21 | 1 | 2 | 2 | 2 |
| 22 | 1 | 1 | 2 | 2 |
| 23 | 2 | 2 | 2 | 2 |
| 24 | 2 | 2 | 2 | 2 |
| 25 | 2 | 2 | 1 | 1 |
| 26 | 1 | 2 | 2 | 2 |
| 27 | 1 | 2 | 1 | 2 |
| 28 | 1 | 1 | 2 | 2 |
| 29 | 2 | 2 | 2 | 2 |
| 30 | 2 | 2 | 1 | 1 |
| 31 | 2 | 2 | 2 | 2 |
| 32 | 1 | 2 | 2 | 2 |
| 33 | 2 | 2 | 2 | 2 |
| 34 | 2 | 2 | 2 | 2 |
| 35 | 1 | 2 | 2 | 2 |
| 36 | 2 | 2 | 2 | 2 |
| 37 | 2 | 2 | 2 | 2 |
| 38 | 2 | 2 | 1 | 1 |
| 39 | 1 | 2 | 2 | 2 |
| 40 | 2 | 2 | 2 | 2 |
| 41 | 1 | 2 | 2 | 2 |
| 42 | 1 | 2 | 2 | 2 |
| 43 | 1 | 1 | 2 | 2 |
| 44 | 1 | 2 | 1 | 2 |
| 45 | 1 | 2 | 2 | 2 |
| 46 | 1 | 2 | 2 | 2 |
| 47 | 2 | 2 | 2 | 2 |
| 48 | 1 | 2 | 2 | 2 |
| 49 | 1 | 2 | 2 | 2 |
| 50 | 1 | 2 | 2 | 2 |
| 51 | 1 | 2 | 2 | 2 |
| 52 | 1 | 2 | 2 | 2 |
| 53 | 1 | 1 | 1 | 2 |
| 54 | 1 | 1 | 1 | 2 |
| 55 | 1 | 2 | 1 | 2 |
| 56 | 2 | 1 | 2 | 2 |
| 57 | 2 | 2 | 1 | 2 |
| 58 | 2 | 2 | 1 | 2 |
| 59 | 2 | 2 | 1 | 2 |
| 60 | 1 | 1 | 2 | 2 |

For peer review only

|    |   |   |   |   |
|----|---|---|---|---|
| 1  |   |   |   |   |
| 2  | 1 | 2 | 2 | 2 |
| 3  | 2 | 2 | 1 | 2 |
| 4  | 2 | 1 | 1 | 2 |
| 5  | 2 | 1 | 1 | 2 |
| 6  | 2 | 1 | 2 | 2 |
| 7  | 2 | 1 | 2 | 2 |
| 8  | 2 | 2 | 1 | 2 |
| 9  | 2 | 2 | 2 | 2 |
| 10 | 2 | 2 | 1 | 2 |
| 11 | 1 | 2 | 2 | 2 |
| 12 | 2 | 2 | 2 | 2 |
| 13 | 2 | 2 | 2 | 2 |
| 14 | 2 | 2 | 2 | 2 |
| 15 | 2 | 2 | 1 | 2 |
| 16 | 2 | 2 | 2 | 1 |
| 17 | 1 | 2 | 1 | 1 |
| 18 | 2 | 2 | 2 | 2 |
| 19 | 2 | 2 | 2 | 2 |
| 20 | 2 | 1 | 2 | 2 |
| 21 | 2 | 2 | 1 | 2 |
| 22 | 2 | 2 | 2 | 2 |
| 23 | 2 | 2 | 2 | 2 |
| 24 | 2 | 2 | 2 | 2 |
| 25 | 1 | 1 | 1 | 2 |
| 26 | 1 | 2 | 2 | 2 |
| 27 | 1 | 2 | 1 | 2 |
| 28 | 2 | 2 | 1 | 1 |
| 29 | 2 | 2 | 2 | 2 |
| 30 | 2 | 2 | 2 | 2 |
| 31 | 1 | 1 | 1 | 2 |
| 32 | 2 | 2 | 2 | 2 |
| 33 | 1 | 2 | 1 | 2 |
| 34 | 2 | 2 | 1 | 2 |
| 35 | 2 | 2 | 2 | 2 |
| 36 | 2 | 2 | 2 | 2 |
| 37 | 1 | 1 | 1 | 2 |
| 38 | 1 | 2 | 2 | 2 |
| 39 | 1 | 2 | 2 | 2 |
| 40 | 1 | 2 | 2 | 2 |
| 41 | 1 | 2 | 2 | 2 |
| 42 | 1 | 2 | 2 | 2 |
| 43 | 1 | 2 | 2 | 2 |
| 44 | 1 | 2 | 1 | 1 |
| 45 | 1 | 2 | 2 | 2 |
| 46 | 1 | 2 | 2 | 2 |
| 47 | 1 | 2 | 2 | 2 |
| 48 | 2 | 2 | 2 | 2 |
| 49 | 1 | 1 | 1 | 1 |
| 50 | 2 | 1 | 2 | 2 |
| 51 | 2 | 2 | 2 | 2 |
| 52 | 2 | 2 | 2 | 2 |
| 53 | 2 | 2 | 2 | 2 |
| 54 | 2 | 2 | 2 | 2 |
| 55 | 1 | 2 | 1 | 1 |
| 56 | 2 | 2 | 2 | 2 |
| 57 | 2 | 1 | 1 | 2 |
| 58 | 1 | 2 | 2 | 2 |
| 59 | 2 | 2 | 2 | 2 |
| 60 | 1 | 2 | 1 | 2 |

|    |   |   |   |   |
|----|---|---|---|---|
| 1  |   |   |   |   |
| 2  | 2 | 2 | 2 | 2 |
| 3  | 2 | 1 | 2 | 1 |
| 4  | 2 | 2 | 2 | 2 |
| 5  | 2 | 2 | 2 | 2 |
| 6  | 2 | 2 | 1 | 2 |
| 7  | 2 | 1 | 2 | 2 |
| 8  | 2 | 1 | 2 | 1 |
| 9  | 2 | 2 | 2 | 2 |
| 10 | 2 | 2 | 2 | 2 |
| 11 | 2 | 2 | 2 | 2 |
| 12 | 2 | 1 | 2 | 2 |
| 13 | 1 | 2 | 2 | 2 |
| 14 | 2 | 2 | 2 | 2 |
| 15 | 1 | 2 | 2 | 2 |
| 16 | 2 | 2 | 2 | 2 |
| 17 | 1 | 2 | 2 | 2 |
| 18 | 2 | 1 | 2 | 2 |
| 19 | 1 | 2 | 2 | 2 |
| 20 | 1 | 1 | 1 | 2 |
| 21 | 2 | 2 | 2 | 2 |
| 22 | 2 | 1 | 2 | 2 |
| 23 | 2 | 2 | 2 | 2 |
| 24 | 2 | 2 | 1 | 2 |
| 25 | 2 | 1 | 2 | 2 |
| 26 | 2 | 2 | 2 | 2 |
| 27 | 2 | 2 | 2 | 2 |
| 28 | 1 | 1 | 2 | 2 |
| 29 | 2 | 2 | 2 | 1 |
| 30 | 1 | 1 | 2 | 2 |
| 31 | 2 | 2 | 2 | 2 |
| 32 | 2 | 1 | 1 | 2 |
| 33 | 2 | 2 | 1 | 2 |
| 34 | 2 | 2 | 2 | 2 |
| 35 | 2 | 2 | 2 | 2 |
| 36 | 2 | 2 | 2 | 2 |
| 37 | 2 | 2 | 2 | 2 |
| 38 | 1 | 2 | 2 | 1 |
| 39 | 2 | 2 | 2 | 2 |
| 40 | 1 | 1 | 1 | 2 |
| 41 | 1 | 2 | 2 | 2 |
| 42 | 2 | 2 | 2 | 2 |
| 43 | 2 | 2 | 2 | 2 |
| 44 | 2 | 2 | 2 | 2 |
| 45 | 2 | 2 | 1 | 2 |
| 46 | 1 | 2 | 2 | 2 |
| 47 | 2 | 2 | 2 | 2 |
| 48 | 2 | 2 | 1 | 2 |
| 49 | 1 | 2 | 2 | 2 |
| 50 | 2 | 2 | 2 | 2 |
| 51 | 2 | 1 | 2 | 2 |
| 52 | 2 | 2 | 2 | 2 |
| 53 | 2 | 2 | 2 | 2 |
| 54 | 1 | 2 | 2 | 2 |
| 55 | 1 | 2 | 2 | 2 |
| 56 | 1 | 2 | 2 | 2 |
| 57 | 1 | 2 | 2 | 2 |
| 58 | 2 | 2 | 2 | 2 |
| 59 | 2 | 2 | 2 | 2 |
| 60 | 1 | 2 | 1 | 2 |

For peer review only

|    |   |   |   |   |
|----|---|---|---|---|
| 1  |   |   |   |   |
| 2  | 2 | 2 | 2 | 2 |
| 3  | 2 | 2 | 2 | 1 |
| 4  | 1 | 2 | 2 | 1 |
| 5  | 1 | 2 | 1 | 1 |
| 6  | 1 | 2 | 2 | 1 |
| 7  | 1 | 2 | 2 | 1 |
| 8  | 2 | 2 | 2 | 2 |
| 9  | 2 | 2 | 1 | 1 |
| 10 | 1 | 2 | 2 | 2 |
| 11 | 2 | 2 | 1 | 1 |
| 12 | 1 | 2 | 1 | 2 |
| 13 | 1 | 2 | 2 | 2 |
| 14 | 1 | 2 | 2 | 2 |
| 15 | 1 | 2 | 2 | 2 |
| 16 | 2 | 2 | 2 | 2 |
| 17 | 2 | 1 | 2 | 2 |
| 18 | 1 | 2 | 2 | 2 |
| 19 | 2 | 2 | 2 | 2 |
| 20 | 2 | 2 | 2 | 2 |
| 21 | 1 | 2 | 2 | 2 |
| 22 | 2 | 2 | 2 | 2 |
| 23 | 1 | 1 | 1 | 2 |
| 24 | 1 | 2 | 1 | 2 |
| 25 | 2 | 2 | 2 | 2 |
| 26 | 2 | 2 | 2 | 2 |
| 27 | 2 | 2 | 2 | 2 |
| 28 | 2 | 2 | 2 | 2 |
| 29 | 2 | 2 | 2 | 2 |
| 30 | 2 | 2 | 2 | 2 |
| 31 | 2 | 2 | 2 | 2 |
| 32 | 1 | 2 | 2 | 2 |
| 33 | 2 | 1 | 2 | 2 |
| 34 | 2 | 2 | 2 | 2 |
| 35 | 2 | 2 | 2 | 2 |
| 36 | 2 | 2 | 2 | 2 |
| 37 | 1 | 2 | 2 | 1 |
| 38 | 2 | 2 | 2 | 2 |
| 39 | 2 | 2 | 2 | 2 |
| 40 | 2 | 2 | 2 | 2 |
| 41 | 2 | 2 | 2 | 2 |
| 42 | 2 | 2 | 2 | 2 |
| 43 | 2 | 2 | 2 | 2 |
| 44 | 2 | 2 | 2 | 2 |
| 45 | 2 | 2 | 2 | 2 |
| 46 | 2 | 2 | 2 | 2 |
| 47 | 2 | 2 | 2 | 2 |
| 48 | 2 | 2 | 2 | 2 |
| 49 | 2 | 2 | 2 | 2 |
| 50 | 1 | 2 | 2 | 2 |
| 51 | 2 | 2 | 2 | 2 |
| 52 | 1 | 2 | 2 | 2 |
| 53 | 1 | 1 | 2 | 2 |
| 54 | 1 | 2 | 2 | 2 |
| 55 | 2 | 2 | 2 | 2 |
| 56 | 2 | 2 | 2 | 2 |
| 57 | 2 | 2 | 2 | 2 |
| 58 | 2 | 2 | 2 | 2 |
| 59 | 2 | 2 | 2 | 2 |
| 60 | 2 | 2 | 2 | 2 |

For peer review only

|    |   |   |   |   |
|----|---|---|---|---|
| 1  |   |   |   |   |
| 2  | 2 | 2 | 1 | 2 |
| 3  | 1 | 2 | 1 | 2 |
| 4  | 1 | 2 | 2 | 2 |
| 5  | 1 | 2 | 2 | 2 |
| 6  | 2 | 2 | 2 | 2 |
| 7  | 1 | 1 | 2 | 2 |
| 8  | 1 | 2 | 2 | 2 |
| 9  | 1 | 2 | 2 | 2 |
| 10 | 2 | 2 | 2 | 2 |
| 11 | 1 | 2 | 2 | 2 |
| 12 | 2 | 2 | 2 | 2 |
| 13 | 2 | 2 | 2 | 2 |
| 14 | 1 | 1 | 1 | 2 |
| 15 | 1 | 2 | 1 | 2 |
| 16 | 1 | 2 | 2 | 2 |
| 17 | 1 | 2 | 2 | 2 |
| 18 | 1 | 2 | 2 | 2 |
| 19 | 2 | 2 | 2 | 2 |
| 20 | 1 | 1 | 2 | 2 |
| 21 | 1 | 2 | 2 | 2 |
| 22 | 2 | 2 | 2 | 2 |
| 23 | 2 | 2 | 2 | 2 |
| 24 | 1 | 2 | 2 | 2 |
| 25 | 2 | 2 | 2 | 2 |
| 26 | 1 | 1 | 1 | 2 |
| 27 | 1 | 2 | 1 | 2 |
| 28 | 1 | 2 | 2 | 2 |
| 29 | 1 | 2 | 2 | 2 |
| 30 | 2 | 2 | 2 | 2 |
| 31 | 2 | 2 | 2 | 2 |
| 32 | 2 | 1 | 2 | 2 |
| 33 | 2 | 2 | 2 | 2 |
| 34 | 2 | 1 | 2 | 1 |
| 35 | 2 | 2 | 2 | 2 |
| 36 | 2 | 2 | 2 | 2 |
| 37 | 2 | 2 | 2 | 2 |
| 38 | 2 | 2 | 2 | 2 |
| 39 | 1 | 1 | 2 | 2 |
| 40 | 1 | 1 | 2 | 2 |
| 41 | 2 | 2 | 2 | 1 |
| 42 | 2 | 2 | 2 | 2 |
| 43 | 1 | 2 | 2 | 2 |
| 44 | 1 | 1 | 2 | 2 |
| 45 | 1 | 2 | 2 | 2 |
| 46 | 1 | 1 | 2 | 2 |
| 47 | 1 | 1 | 2 | 2 |
| 48 | 2 | 2 | 2 | 2 |
| 49 | 1 | 2 | 2 | 1 |
| 50 | 1 | 2 | 1 | 1 |
| 51 | 1 | 2 | 2 | 1 |
| 52 | 1 | 2 | 2 | 2 |
| 53 | 2 | 2 | 2 | 2 |
| 54 | 2 | 2 | 1 | 1 |
| 55 | 1 | 2 | 2 | 2 |
| 56 | 2 | 2 | 1 | 1 |
| 57 | 1 | 2 | 1 | 2 |
| 58 | 1 | 2 | 2 | 2 |
| 59 | 1 | 2 | 2 | 2 |
| 60 | 1 | 2 | 2 | 2 |
|    | 2 | 2 | 2 | 2 |

For peer review only

|    |   |   |   |   |
|----|---|---|---|---|
| 1  |   |   |   |   |
| 2  | 1 | 1 | 2 | 2 |
| 3  | 1 | 2 | 2 | 2 |
| 4  | 1 | 2 | 1 | 1 |
| 5  | 1 | 2 | 2 | 2 |
| 6  | 1 | 2 | 1 | 1 |
| 7  | 1 | 2 | 1 | 2 |
| 8  | 1 | 2 | 1 | 2 |
| 9  | 2 | 1 | 2 | 2 |
| 10 | 1 | 2 | 2 | 2 |
| 11 | 2 | 2 | 2 | 2 |
| 12 | 1 | 1 | 1 | 2 |
| 13 | 1 | 2 | 1 | 2 |
| 14 | 1 | 2 | 1 | 2 |
| 15 | 1 | 2 | 1 | 2 |
| 16 | 1 | 2 | 1 | 2 |
| 17 | 2 | 2 | 2 | 2 |
| 18 | 1 | 2 | 1 | 2 |
| 19 | 1 | 2 | 2 | 2 |
| 20 | 1 | 2 | 2 | 2 |
| 21 | 1 | 2 | 2 | 2 |
| 22 | 2 | 2 | 2 | 2 |
| 23 | 1 | 1 | 2 | 2 |
| 24 | 2 | 1 | 2 | 2 |
| 25 | 2 | 1 | 2 | 2 |
| 26 | 2 | 1 | 2 | 2 |
| 27 | 1 | 2 | 1 | 2 |
| 28 | 1 | 2 | 1 | 2 |
| 29 | 1 | 2 | 1 | 2 |
| 30 | 1 | 2 | 2 | 2 |
| 31 | 2 | 2 | 2 | 2 |
| 32 | 1 | 2 | 2 | 2 |
| 33 | 1 | 2 | 2 | 2 |
| 34 | 1 | 1 | 1 | 2 |
| 35 | 1 | 2 | 1 | 2 |
| 36 | 1 | 2 | 1 | 2 |
| 37 | 1 | 2 | 1 | 2 |
| 38 | 1 | 2 | 2 | 2 |
| 39 | 2 | 1 | 2 | 2 |
| 40 | 1 | 2 | 2 | 2 |
| 41 | 1 | 2 | 2 | 1 |
| 42 | 1 | 2 | 2 | 2 |
| 43 | 1 | 2 | 2 | 2 |
| 44 | 1 | 2 | 2 | 2 |
| 45 | 1 | 2 | 2 | 2 |
| 46 | 1 | 2 | 2 | 2 |
| 47 | 1 | 2 | 2 | 2 |
| 48 | 1 | 2 | 2 | 2 |
| 49 | 1 | 2 | 2 | 2 |
| 50 | 1 | 2 | 2 | 2 |
| 51 | 2 | 2 | 2 | 2 |
| 52 | 1 | 2 | 2 | 2 |
| 53 | 1 | 2 | 2 | 2 |
| 54 | 2 | 2 | 2 | 2 |
| 55 | 1 | 2 | 1 | 2 |
| 56 | 1 | 2 | 2 | 2 |
| 57 | 2 | 1 | 2 | 2 |
| 58 | 2 | 1 | 2 | 2 |
| 59 | 2 | 2 | 2 | 2 |
| 60 | 2 | 2 | 2 | 2 |



|    |   |   |   |   |
|----|---|---|---|---|
| 1  |   |   |   |   |
| 2  | 2 | 1 | 2 | 2 |
| 3  | 2 | 2 | 2 | 2 |
| 4  | 1 | 2 | 2 | 2 |
| 5  | 2 | 2 | 2 | 2 |
| 6  | 2 | 1 | 1 | 2 |
| 7  | 2 | 2 | 2 | 2 |
| 8  | 2 | 2 | 2 | 2 |
| 9  | 2 | 2 | 2 | 2 |
| 10 | 2 | 2 | 2 | 2 |
| 11 | 2 | 1 | 2 | 2 |
| 12 | 2 | 2 | 2 | 2 |
| 13 | 2 | 2 | 2 | 2 |
| 14 | 2 | 2 | 2 | 2 |
| 15 | 2 | 1 | 1 | 2 |
| 16 | 2 | 2 | 1 | 2 |
| 17 | 2 | 2 | 2 | 2 |
| 18 | 2 | 1 | 2 | 2 |
| 19 | 2 | 2 | 2 | 2 |
| 20 | 2 | 2 | 2 | 2 |
| 21 | 2 | 1 | 2 | 2 |
| 22 | 2 | 1 | 2 | 2 |
| 23 | 2 | 1 | 2 | 2 |
| 24 | 2 | 1 | 2 | 2 |
| 25 | 2 | 2 | 2 | 2 |
| 26 | 2 | 1 | 2 | 2 |
| 27 | 2 | 2 | 2 | 2 |
| 28 | 2 | 2 | 2 | 2 |
| 29 | 2 | 2 | 2 | 2 |
| 30 | 2 | 2 | 2 | 2 |
| 31 | 2 | 1 | 2 | 2 |
| 32 | 2 | 2 | 2 | 2 |
| 33 | 2 | 1 | 2 | 2 |
| 34 | 2 | 2 | 2 | 2 |
| 35 | 2 | 1 | 2 | 2 |
| 36 | 2 | 2 | 2 | 2 |
| 37 | 2 | 2 | 2 | 2 |
| 38 | 2 | 1 | 2 | 2 |
| 39 | 2 | 2 | 1 | 2 |
| 40 | 1 | 2 | 2 | 2 |
| 41 | 2 | 1 | 2 | 2 |
| 42 | 2 | 1 | 2 | 2 |
| 43 | 2 | 1 | 2 | 2 |
| 44 | 2 | 2 | 2 | 2 |
| 45 | 1 | 2 | 2 | 2 |
| 46 | 2 | 1 | 1 | 2 |
| 47 | 2 | 2 | 1 | 2 |
| 48 | 2 | 2 | 1 | 2 |
| 49 | 2 | 2 | 1 | 2 |
| 50 | 2 | 1 | 1 | 2 |
| 51 | 1 | 2 | 1 | 2 |
| 52 | 1 | 2 | 2 | 2 |
| 53 | 1 | 2 | 2 | 2 |
| 54 | 2 | 2 | 2 | 2 |
| 55 | 1 | 2 | 1 | 2 |
| 56 | 1 | 1 | 2 | 2 |
| 57 | 1 | 2 | 2 | 2 |
| 58 | 1 | 2 | 2 | 2 |
| 59 | 1 | 2 | 2 | 1 |
| 60 | 2 | 2 | 1 | 1 |
|    | 2 | 2 | 2 | 2 |

For peer review only

|    |   |   |   |   |
|----|---|---|---|---|
| 1  |   |   |   |   |
| 2  | 2 | 2 | 1 | 2 |
| 3  | 2 | 1 | 1 | 1 |
| 4  | 1 | 1 | 2 | 2 |
| 5  | 1 | 2 | 1 | 2 |
| 6  | 1 | 2 | 2 | 2 |
| 7  | 1 | 2 | 2 | 2 |
| 8  | 1 | 2 | 2 | 2 |
| 9  | 1 | 1 | 2 | 2 |
| 10 | 1 | 2 | 2 | 2 |
| 11 | 2 | 2 | 2 | 1 |
| 12 | 2 | 2 | 2 | 2 |
| 13 | 2 | 2 | 2 | 2 |
| 14 | 1 | 1 | 2 | 2 |
| 15 | 1 | 2 | 1 | 2 |
| 16 | 2 | 2 | 1 | 2 |
| 17 | 1 | 2 | 1 | 2 |
| 18 | 2 | 2 | 2 | 2 |
| 19 | 2 | 2 | 2 | 2 |
| 20 | 1 | 2 | 2 | 2 |
| 21 | 1 | 1 | 2 | 2 |
| 22 | 1 | 2 | 2 | 2 |
| 23 | 2 | 2 | 2 | 2 |
| 24 | 2 | 2 | 2 | 2 |
| 25 | 1 | 2 | 2 | 2 |
| 26 | 2 | 2 | 2 | 2 |
| 27 | 2 | 2 | 2 | 2 |
| 28 | 2 | 2 | 2 | 2 |
| 29 | 2 | 1 | 2 | 2 |
| 30 | 2 | 1 | 2 | 2 |
| 31 | 1 | 2 | 2 | 2 |
| 32 | 2 | 2 | 2 | 2 |
| 33 | 2 | 2 | 1 | 2 |
| 34 | 2 | 1 | 2 | 2 |
| 35 | 1 | 2 | 2 | 2 |
| 36 | 2 | 1 | 1 | 2 |
| 37 | 2 | 1 | 2 | 2 |
| 38 | 2 | 1 | 2 | 2 |
| 39 | 2 | 2 | 2 | 2 |
| 40 | 2 | 2 | 2 | 2 |
| 41 | 2 | 2 | 2 | 2 |
| 42 | 2 | 2 | 2 | 2 |
| 43 | 2 | 2 | 2 | 2 |
| 44 | 2 | 2 | 2 | 2 |
| 45 | 2 | 1 | 2 | 2 |
| 46 | 2 | 2 | 2 | 2 |
| 47 | 2 | 2 | 2 | 2 |
| 48 | 1 | 2 | 2 | 2 |
| 49 | 1 | 1 | 2 | 2 |
| 50 | 2 | 2 | 2 | 2 |
| 51 | 2 | 2 | 2 | 2 |
| 52 | 2 | 2 | 2 | 2 |
| 53 | 1 | 2 | 2 | 2 |
| 54 | 1 | 1 | 2 | 2 |
| 55 | 2 | 2 | 2 | 2 |
| 56 | 2 | 2 | 2 | 2 |
| 57 | 2 | 2 | 2 | 2 |
| 58 | 2 | 2 | 2 | 2 |
| 59 | 1 | 2 | 2 | 2 |
| 60 | 2 | 2 | 2 | 2 |
|    | 1 | 2 | 2 | 2 |

|    |   |   |   |   |
|----|---|---|---|---|
| 1  |   |   |   |   |
| 2  | 2 | 2 | 2 | 2 |
| 3  | 2 | 2 | 2 | 2 |
| 4  | 2 | 2 | 2 | 2 |
| 5  | 2 | 1 | 2 | 2 |
| 6  | 2 | 2 | 2 | 2 |
| 7  | 2 | 2 | 2 | 2 |
| 8  | 1 | 2 | 2 | 2 |
| 9  | 2 | 2 | 2 | 2 |
| 10 | 2 | 2 | 2 | 2 |
| 11 | 2 | 2 | 2 | 2 |
| 12 | 2 | 2 | 2 | 2 |
| 13 | 2 | 2 | 2 | 2 |
| 14 | 1 | 2 | 2 | 2 |
| 15 | 2 | 2 | 2 | 2 |
| 16 | 2 | 2 | 2 | 2 |
| 17 | 2 | 1 | 2 | 2 |
| 18 | 2 | 2 | 2 | 2 |
| 19 | 2 | 2 | 2 | 2 |
| 20 | 2 | 2 | 2 | 2 |
| 21 | 2 | 2 | 2 | 2 |
| 22 | 1 | 2 | 2 | 2 |
| 23 | 2 | 2 | 2 | 2 |
| 24 | 2 | 2 | 2 | 2 |
| 25 | 1 | 2 | 2 | 2 |
| 26 | 2 | 2 | 2 | 2 |
| 27 | 2 | 2 | 2 | 2 |
| 28 | 2 | 2 | 2 | 2 |
| 29 | 2 | 2 | 2 | 2 |
| 30 | 2 | 2 | 2 | 2 |
| 31 | 1 | 2 | 1 | 2 |
| 32 | 2 | 2 | 2 | 2 |
| 33 | 2 | 2 | 2 | 2 |
| 34 | 2 | 2 | 2 | 2 |
| 35 | 2 | 2 | 2 | 2 |
| 36 | 2 | 2 | 2 | 2 |
| 37 | 2 | 1 | 2 | 2 |
| 38 | 2 | 2 | 2 | 2 |
| 39 | 1 | 2 | 2 | 2 |
| 40 | 2 | 2 | 2 | 2 |
| 41 | 1 | 2 | 2 | 2 |
| 42 | 2 | 2 | 2 | 2 |
| 43 | 2 | 2 | 2 | 2 |
| 44 | 2 | 2 | 2 | 2 |
| 45 | 1 | 2 | 2 | 2 |
| 46 | 1 | 1 | 2 | 2 |
| 47 | 2 | 2 | 2 | 2 |
| 48 | 2 | 2 | 2 | 2 |
| 49 | 2 | 2 | 2 | 2 |
| 50 | 2 | 2 | 2 | 2 |
| 51 | 1 | 2 | 2 | 2 |
| 52 | 1 | 2 | 2 | 2 |
| 53 | 2 | 2 | 2 | 2 |
| 54 | 1 | 2 | 2 | 2 |
| 55 | 2 | 2 | 2 | 2 |
| 56 | 1 | 2 | 2 | 2 |
| 57 | 1 | 2 | 2 | 2 |
| 58 | 1 | 2 | 2 | 2 |
| 59 | 2 | 1 | 2 | 2 |
| 60 | 2 | 2 | 2 | 2 |

For peer review only

|    |   |   |   |   |
|----|---|---|---|---|
| 1  |   |   |   |   |
| 2  | 2 | 2 | 2 | 2 |
| 3  | 2 | 2 | 2 | 2 |
| 4  | 2 | 2 | 2 | 2 |
| 5  | 1 | 2 | 2 | 2 |
| 6  | 1 | 2 | 2 | 2 |
| 7  | 1 | 2 | 2 | 2 |
| 8  | 2 | 2 | 2 | 2 |
| 9  | 1 | 2 | 2 | 2 |
| 10 | 1 | 2 | 2 | 2 |
| 11 | 2 | 2 | 2 | 2 |
| 12 | 2 | 1 | 1 | 2 |
| 13 | 2 | 2 | 1 | 2 |
| 14 | 1 | 2 | 1 | 2 |
| 15 | 1 | 2 | 2 | 2 |
| 16 | 1 | 2 | 2 | 2 |
| 17 | 1 | 2 | 2 | 2 |
| 18 | 2 | 2 | 2 | 2 |
| 19 | 2 | 2 | 2 | 2 |
| 20 | 2 | 2 | 2 | 2 |
| 21 | 2 | 2 | 2 | 2 |
| 22 | 1 | 1 | 2 | 2 |
| 23 | 1 | 2 | 2 | 2 |
| 24 | 2 | 1 | 1 | 2 |
| 25 | 2 | 2 | 1 | 2 |
| 26 | 1 | 2 | 2 | 2 |
| 27 | 2 | 2 | 2 | 2 |
| 28 | 2 | 2 | 2 | 2 |
| 29 | 2 | 2 | 2 | 2 |
| 30 | 2 | 2 | 1 | 2 |
| 31 | 2 | 2 | 2 | 2 |
| 32 | 2 | 2 | 2 | 2 |
| 33 | 2 | 2 | 2 | 2 |
| 34 | 1 | 2 | 2 | 2 |
| 35 | 1 | 2 | 2 | 2 |
| 36 | 2 | 2 | 2 | 2 |
| 37 | 2 | 2 | 2 | 2 |
| 38 | 2 | 2 | 2 | 2 |
| 39 | 1 | 2 | 2 | 2 |
| 40 | 2 | 1 | 2 | 2 |
| 41 | 1 | 2 | 2 | 2 |
| 42 | 1 | 2 | 2 | 2 |
| 43 | 2 | 1 | 2 | 2 |
| 44 | 2 | 2 | 2 | 2 |
| 45 | 1 | 2 | 1 | 2 |
| 46 | 2 | 2 | 2 | 2 |
| 47 | 2 | 2 | 2 | 2 |
| 48 | 2 | 2 | 2 | 2 |
| 49 | 2 | 2 | 2 | 2 |
| 50 | 2 | 2 | 2 | 2 |
| 51 | 1 | 2 | 2 | 2 |
| 52 | 1 | 2 | 2 | 2 |
| 53 | 1 | 2 | 2 | 2 |
| 54 | 1 | 2 | 1 | 2 |
| 55 | 2 | 1 | 2 | 1 |
| 56 | 1 | 2 | 1 | 2 |
| 57 | 2 | 1 | 2 | 2 |
| 58 | 2 | 2 | 2 | 2 |
| 59 | 2 | 2 | 2 | 2 |
| 60 | 1 | 2 | 2 | 2 |

|    |   |   |   |   |
|----|---|---|---|---|
| 1  |   |   |   |   |
| 2  | 2 | 2 | 2 | 1 |
| 3  | 1 | 2 | 2 | 2 |
| 4  | 1 | 1 | 2 | 2 |
| 5  | 2 | 1 | 1 | 2 |
| 6  | 1 | 2 | 2 | 2 |
| 7  | 1 | 2 | 2 | 2 |
| 8  | 1 | 2 | 2 | 2 |
| 9  | 2 | 1 | 2 | 2 |
| 10 | 1 | 1 | 2 | 2 |
| 11 | 1 | 2 | 1 | 2 |
| 12 | 1 | 1 | 2 | 2 |
| 13 | 1 | 1 | 2 | 2 |
| 14 | 2 | 1 | 2 | 2 |
| 15 | 1 | 1 | 2 | 2 |
| 16 | 1 | 2 | 2 | 2 |
| 17 | 2 | 2 | 2 | 2 |
| 18 | 2 | 2 | 2 | 2 |
| 19 | 2 | 2 | 2 | 2 |
| 20 | 2 | 2 | 2 | 2 |
| 21 | 2 | 1 | 2 | 2 |
| 22 | 1 | 1 | 2 | 2 |
| 23 | 1 | 1 | 2 | 2 |
| 24 | 1 | 2 | 2 | 2 |
| 25 | 2 | 2 | 2 | 2 |
| 26 | 2 | 2 | 2 | 2 |
| 27 | 1 | 1 | 2 | 2 |
| 28 | 1 | 1 | 2 | 2 |
| 29 | 1 | 2 | 2 | 2 |
| 30 | 2 | 2 | 2 | 2 |
| 31 | 1 | 2 | 2 | 2 |
| 32 | 1 | 2 | 2 | 2 |
| 33 | 1 | 2 | 2 | 2 |
| 34 | 2 | 1 | 2 | 2 |
| 35 | 2 | 1 | 2 | 2 |
| 36 | 2 | 1 | 2 | 2 |
| 37 | 2 | 1 | 2 | 2 |
| 38 | 2 | 2 | 2 | 2 |
| 39 | 1 | 2 | 2 | 2 |
| 40 | 1 | 1 | 2 | 2 |
| 41 | 1 | 1 | 2 | 2 |
| 42 | 2 | 2 | 2 | 2 |
| 43 | 1 | 2 | 2 | 2 |
| 44 | 1 | 1 | 2 | 2 |
| 45 | 2 | 2 | 2 | 2 |
| 46 | 2 | 2 | 2 | 2 |
| 47 | 2 | 2 | 2 | 2 |
| 48 | 2 | 2 | 2 | 2 |
| 49 | 1 | 2 | 2 | 2 |
| 50 | 1 | 2 | 2 | 2 |
| 51 | 2 | 1 | 2 | 2 |
| 52 | 2 | 2 | 2 | 2 |
| 53 | 2 | 2 | 2 | 2 |
| 54 | 2 | 1 | 1 | 2 |
| 55 | 2 | 2 | 2 | 2 |
| 56 | 2 | 2 | 2 | 2 |
| 57 | 2 | 2 | 2 | 2 |
| 58 | 2 | 2 | 2 | 2 |
| 59 | 1 | 2 | 2 | 2 |
| 60 | 1 | 2 | 2 | 2 |

For peer review only

|    |   |   |   |   |
|----|---|---|---|---|
| 1  |   |   |   |   |
| 2  | 2 | 2 | 2 | 2 |
| 3  | 1 | 2 | 2 | 2 |
| 4  | 2 | 1 | 2 | 2 |
| 5  | 1 | 2 | 2 | 2 |
| 6  | 1 | 2 | 2 | 2 |
| 7  | 1 | 2 | 2 | 2 |
| 8  | 1 | 1 | 1 | 1 |
| 9  | 1 | 2 | 2 | 2 |
| 10 | 1 | 2 | 2 | 2 |
| 11 | 2 | 2 | 2 | 1 |
| 12 | 1 | 2 | 2 | 2 |
| 13 | 1 | 2 | 2 | 2 |
| 14 | 1 | 2 | 2 | 2 |
| 15 | 1 | 2 | 2 | 2 |
| 16 | 2 | 1 | 1 | 2 |
| 17 | 1 | 2 | 2 | 2 |
| 18 | 2 | 2 | 2 | 2 |
| 19 | 2 | 2 | 2 | 2 |
| 20 | 2 | 2 | 2 | 2 |
| 21 | 1 | 2 | 2 | 2 |
| 22 | 2 | 2 | 2 | 2 |
| 23 | 2 | 2 | 2 | 2 |
| 24 | 2 | 2 | 2 | 2 |
| 25 | 2 | 2 | 2 | 2 |
| 26 | 2 | 2 | 2 | 2 |
| 27 | 2 | 1 | 2 | 2 |
| 28 | 2 | 1 | 2 | 2 |
| 29 | 2 | 1 | 2 | 2 |
| 30 | 2 | 1 | 2 | 2 |
| 31 | 2 | 1 | 2 | 2 |
| 32 | 1 | 2 | 2 | 2 |
| 33 | 2 | 2 | 2 | 2 |
| 34 | 1 | 2 | 2 | 2 |
| 35 | 2 | 2 | 2 | 2 |
| 36 | 2 | 2 | 2 | 2 |
| 37 | 2 | 2 | 2 | 2 |
| 38 | 2 | 2 | 2 | 2 |
| 39 | 2 | 2 | 2 | 2 |
| 40 | 2 | 1 | 2 | 2 |
| 41 | 2 | 2 | 2 | 2 |
| 42 | 2 | 2 | 2 | 2 |
| 43 | 1 | 2 | 2 | 2 |
| 44 | 1 | 2 | 2 | 2 |
| 45 | 1 | 1 | 2 | 2 |
| 46 | 1 | 2 | 2 | 2 |
| 47 | 1 | 2 | 2 | 2 |
| 48 | 1 | 2 | 2 | 2 |
| 49 | 2 | 2 | 2 | 2 |
| 50 | 1 | 2 | 2 | 2 |
| 51 | 1 | 2 | 2 | 2 |
| 52 | 1 | 2 | 2 | 2 |
| 53 | 1 | 2 | 2 | 2 |
| 54 | 1 | 2 | 2 | 2 |
| 55 | 1 | 1 | 2 | 2 |
| 56 | 1 | 2 | 2 | 2 |
| 57 | 2 | 2 | 2 | 2 |
| 58 | 2 | 2 | 2 | 2 |
| 59 | 2 | 2 | 2 | 2 |
| 60 | 2 | 2 | 2 | 2 |
|    | 2 | 1 | 2 | 2 |

|    |   |   |   |   |
|----|---|---|---|---|
| 1  |   |   |   |   |
| 2  | 1 | 1 | 2 | 2 |
| 3  | 2 | 1 | 2 | 2 |
| 4  | 1 | 2 | 2 | 2 |
| 5  | 1 | 1 | 2 | 2 |
| 6  | 2 | 2 | 1 | 2 |
| 7  | 1 | 1 | 2 | 2 |
| 8  | 1 | 2 | 2 | 1 |
| 9  | 2 | 2 | 2 | 2 |
| 10 | 1 | 1 | 2 | 2 |
| 11 | 2 | 2 | 2 | 2 |
| 12 | 1 | 2 | 2 | 2 |
| 13 | 2 | 2 | 2 | 2 |
| 14 | 2 | 2 | 1 | 2 |
| 15 | 1 | 1 | 2 | 2 |
| 16 | 1 | 2 | 2 | 2 |
| 17 | 2 | 2 | 2 | 2 |
| 18 | 2 | 1 | 2 | 2 |
| 19 | 2 | 2 | 2 | 2 |
| 20 | 1 | 2 | 2 | 2 |
| 21 | 2 | 2 | 2 | 2 |
| 22 | 1 | 2 | 2 | 2 |
| 23 | 1 | 2 | 2 | 2 |
| 24 | 1 | 2 | 2 | 2 |
| 25 | 2 | 1 | 2 | 2 |
| 26 | 2 | 2 | 2 | 2 |
| 27 | 2 | 2 | 2 | 2 |
| 28 | 2 | 1 | 2 | 2 |
| 29 | 2 | 2 | 1 | 2 |
| 30 | 2 | 2 | 2 | 2 |
| 31 | 1 | 2 | 2 | 2 |
| 32 | 2 | 1 | 2 | 2 |
| 33 | 1 | 2 | 2 | 2 |
| 34 | 1 | 2 | 2 | 2 |
| 35 | 2 | 2 | 2 | 2 |
| 36 | 2 | 2 | 2 | 2 |
| 37 | 2 | 2 | 2 | 2 |
| 38 | 1 | 2 | 2 | 2 |
| 39 | 2 | 2 | 2 | 2 |
| 40 | 1 | 2 | 2 | 2 |
| 41 | 1 | 1 | 2 | 2 |
| 42 | 1 | 2 | 2 | 2 |
| 43 | 2 | 2 | 2 | 2 |
| 44 | 2 | 2 | 2 | 2 |
| 45 | 2 | 2 | 2 | 2 |
| 46 | 1 | 2 | 2 | 2 |
| 47 | 1 | 2 | 2 | 2 |
| 48 | 1 | 2 | 2 | 2 |
| 49 | 1 | 2 | 2 | 2 |
| 50 | 1 | 2 | 2 | 2 |
| 51 | 2 | 2 | 2 | 2 |
| 52 | 2 | 1 | 2 | 2 |
| 53 | 2 | 2 | 2 | 2 |
| 54 | 1 | 1 | 2 | 2 |
| 55 | 1 | 2 | 2 | 2 |
| 56 | 2 | 2 | 2 | 2 |
| 57 | 1 | 2 | 2 | 2 |
| 58 | 2 | 2 | 2 | 2 |
| 59 | 1 | 2 | 2 | 2 |
| 60 | 2 | 2 | 2 | 2 |
|    | 2 | 1 | 2 | 2 |

For peer review only

|    |   |   |   |   |
|----|---|---|---|---|
| 1  |   |   |   |   |
| 2  | 2 | 2 | 2 | 2 |
| 3  | 1 | 2 | 2 | 2 |
| 4  | 2 | 2 | 2 | 2 |
| 5  | 2 | 2 | 2 | 2 |
| 6  | 1 | 2 | 2 | 2 |
| 7  | 2 | 2 | 2 | 2 |
| 8  | 1 | 1 | 2 | 2 |
| 9  | 2 | 1 | 2 | 2 |
| 10 | 1 | 1 | 2 | 2 |
| 11 | 2 | 2 | 2 | 2 |
| 12 | 1 | 1 | 2 | 2 |
| 13 | 2 | 2 | 2 | 2 |
| 14 | 1 | 1 | 2 | 2 |
| 15 | 2 | 1 | 2 | 2 |
| 16 | 2 | 2 | 2 | 2 |
| 17 | 2 | 2 | 2 | 2 |
| 18 | 2 | 2 | 2 | 2 |
| 19 | 2 | 2 | 2 | 2 |
| 20 | 1 | 2 | 2 | 2 |
| 21 | 2 | 2 | 2 | 2 |
| 22 | 2 | 2 | 1 | 2 |
| 23 | 2 | 1 | 2 | 2 |
| 24 | 1 | 2 | 1 | 2 |
| 25 | 2 | 1 | 1 | 2 |
| 26 | 1 | 1 | 2 | 2 |
| 27 | 2 | 1 | 2 | 2 |
| 28 | 2 | 1 | 2 | 2 |
| 29 | 2 | 1 | 2 | 2 |
| 30 | 2 | 1 | 2 | 2 |
| 31 | 2 | 1 | 2 | 2 |
| 32 | 2 | 1 | 2 | 2 |
| 33 | 1 | 2 | 2 | 2 |
| 34 | 1 | 1 | 2 | 2 |
| 35 | 2 | 2 | 2 | 2 |
| 36 | 1 | 2 | 2 | 2 |
| 37 | 1 | 1 | 2 | 2 |
| 38 | 1 | 1 | 2 | 2 |
| 39 | 1 | 1 | 2 | 2 |
| 40 | 2 | 2 | 2 | 2 |
| 41 | 2 | 2 | 2 | 2 |
| 42 | 2 | 1 | 2 | 2 |
| 43 | 1 | 2 | 2 | 2 |
| 44 | 1 | 2 | 2 | 2 |
| 45 | 1 | 2 | 2 | 2 |
| 46 | 1 | 2 | 2 | 2 |
| 47 | 2 | 1 | 2 | 2 |
| 48 | 2 | 1 | 2 | 2 |
| 49 | 2 | 1 | 2 | 2 |
| 50 | 2 | 1 | 2 | 2 |
| 51 | 2 | 1 | 2 | 2 |
| 52 | 1 | 2 | 2 | 2 |
| 53 | 2 | 2 | 2 | 2 |
| 54 | 1 | 2 | 2 | 2 |
| 55 | 1 | 1 | 2 | 2 |
| 56 | 2 | 2 | 2 | 2 |
| 57 | 2 | 2 | 2 | 2 |
| 58 | 2 | 2 | 2 | 2 |
| 59 | 2 | 2 | 2 | 2 |
| 60 | 2 | 2 | 2 | 2 |



|    |   |   |   |   |
|----|---|---|---|---|
| 1  |   |   |   |   |
| 2  | 1 | 2 | 2 | 2 |
| 3  | 2 | 2 | 2 | 2 |
| 4  | 1 | 2 | 2 | 2 |
| 5  | 2 | 2 | 2 | 2 |
| 6  | 1 | 2 | 2 | 2 |
| 7  | 1 | 2 | 2 | 2 |
| 8  | 1 | 2 | 2 | 2 |
| 9  | 1 | 2 | 2 | 2 |
| 10 | 1 | 1 | 2 | 2 |
| 11 | 1 | 1 | 1 | 2 |
| 12 | 2 | 2 | 2 | 2 |
| 13 | 2 | 2 | 2 | 2 |
| 14 | 2 | 2 | 2 | 2 |
| 15 | 2 | 2 | 2 | 2 |
| 16 | 2 | 2 | 2 | 2 |
| 17 | 2 | 2 | 2 | 1 |
| 18 | 2 | 2 | 2 | 2 |
| 19 | 2 | 2 | 2 | 2 |
| 20 | 1 | 2 | 2 | 2 |
| 21 | 2 | 2 | 2 | 2 |
| 22 | 2 | 2 | 1 | 2 |
| 23 | 2 | 2 | 2 | 2 |
| 24 | 2 | 2 | 2 | 2 |
| 25 | 2 | 2 | 2 | 2 |
| 26 | 2 | 1 | 2 | 2 |
| 27 | 1 | 2 | 2 | 2 |
| 28 | 2 | 2 | 2 | 2 |
| 29 | 1 | 2 | 2 | 2 |
| 30 | 1 | 1 | 2 | 2 |
| 31 | 2 | 2 | 2 | 2 |
| 32 | 2 | 1 | 2 | 2 |
| 33 | 2 | 1 | 2 | 2 |
| 34 | 2 | 1 | 2 | 2 |
| 35 | 2 | 2 | 2 | 2 |
| 36 | 1 | 2 | 2 | 2 |
| 37 | 1 | 2 | 2 | 2 |
| 38 | 1 | 2 | 2 | 2 |
| 39 | 2 | 2 | 1 | 2 |
| 40 | 1 | 2 | 2 | 2 |
| 41 | 2 | 2 | 2 | 2 |
| 42 | 1 | 2 | 2 | 2 |
| 43 | 1 | 2 | 2 | 2 |
| 44 | 1 | 2 | 2 | 2 |
| 45 | 1 | 2 | 1 | 2 |
| 46 | 2 | 2 | 2 | 2 |
| 47 | 2 | 2 | 2 | 2 |
| 48 | 2 | 2 | 2 | 2 |
| 49 | 2 | 2 | 2 | 2 |
| 50 | 2 | 2 | 2 | 2 |
| 51 | 2 | 1 | 2 | 2 |
| 52 | 2 | 2 | 2 | 2 |
| 53 | 2 | 2 | 2 | 2 |
| 54 | 2 | 2 | 2 | 2 |
| 55 | 2 | 1 | 2 | 2 |
| 56 | 2 | 2 | 2 | 2 |
| 57 | 2 | 1 | 2 | 2 |
| 58 | 2 | 1 | 2 | 2 |
| 59 | 1 | 2 | 2 | 2 |
| 60 | 2 | 2 | 1 | 1 |

For peer review only

|    |   |   |   |   |
|----|---|---|---|---|
| 1  |   |   |   |   |
| 2  | 1 | 2 | 2 | 2 |
| 3  | 2 | 2 | 2 | 2 |
| 4  | 1 | 1 | 2 | 2 |
| 5  | 2 | 2 | 2 | 2 |
| 6  | 2 | 1 | 2 | 2 |
| 7  | 1 | 2 | 2 | 2 |
| 8  | 2 | 1 | 2 | 2 |
| 9  | 1 | 2 | 2 | 2 |
| 10 | 2 | 2 | 2 | 2 |
| 11 | 1 | 2 | 1 | 2 |
| 12 | 1 | 2 | 2 | 2 |
| 13 | 2 | 1 | 2 | 2 |
| 14 | 2 | 2 | 2 | 2 |
| 15 | 2 | 2 | 2 | 2 |
| 16 | 2 | 1 | 2 | 2 |
| 17 | 2 | 2 | 2 | 2 |
| 18 | 1 | 2 | 2 | 2 |
| 19 | 1 | 2 | 2 | 2 |
| 20 | 2 | 2 | 2 | 2 |
| 21 | 1 | 2 | 2 | 2 |
| 22 | 1 | 2 | 2 | 2 |
| 23 | 1 | 2 | 1 | 2 |
| 24 | 1 | 2 | 2 | 2 |
| 25 | 2 | 1 | 2 | 2 |
| 26 | 2 | 2 | 2 | 2 |
| 27 | 2 | 2 | 2 | 2 |
| 28 | 1 | 2 | 2 | 2 |
| 29 | 2 | 2 | 2 | 2 |
| 30 | 2 | 1 | 2 | 1 |
| 31 | 2 | 1 | 2 | 2 |
| 32 | 1 | 2 | 2 | 2 |
| 33 | 2 | 1 | 1 | 2 |
| 34 | 2 | 2 | 2 | 2 |
| 35 | 2 | 2 | 2 | 1 |
| 36 | 2 | 2 | 1 | 2 |
| 37 | 2 | 2 | 2 | 2 |
| 38 | 2 | 2 | 2 | 2 |
| 39 | 2 | 2 | 2 | 2 |
| 40 | 2 | 2 | 2 | 2 |
| 41 | 1 | 1 | 2 | 2 |
| 42 | 2 | 2 | 2 | 2 |
| 43 | 1 | 1 | 2 | 2 |
| 44 | 2 | 2 | 1 | 2 |
| 45 | 1 | 1 | 2 | 2 |
| 46 | 1 | 2 | 2 | 2 |
| 47 | 2 | 2 | 2 | 2 |
| 48 | 1 | 2 | 2 | 2 |
| 49 | 2 | 2 | 2 | 2 |
| 50 | 1 | 2 | 2 | 2 |
| 51 | 2 | 1 | 2 | 2 |
| 52 | 1 | 1 | 2 | 2 |
| 53 | 2 | 2 | 2 | 2 |
| 54 | 2 | 2 | 2 | 2 |
| 55 | 2 | 2 | 2 | 2 |
| 56 | 2 | 2 | 2 | 2 |
| 57 | 2 | 1 | 2 | 2 |
| 58 | 1 | 2 | 2 | 2 |
| 59 | 2 | 2 | 2 | 2 |
| 60 | 2 | 1 | 2 | 2 |

|    |   |   |   |   |
|----|---|---|---|---|
| 1  |   |   |   |   |
| 2  | 2 | 1 | 2 | 2 |
| 3  | 2 | 1 | 1 | 1 |
| 4  | 1 | 2 | 2 | 2 |
| 5  | 2 | 2 | 2 | 2 |
| 6  | 1 | 2 | 2 | 2 |
| 7  | 2 | 1 | 2 | 2 |
| 8  | 2 | 2 | 2 | 2 |
| 9  | 2 | 1 | 2 | 2 |
| 10 | 2 | 2 | 2 | 2 |
| 11 | 2 | 1 | 2 | 2 |
| 12 | 1 | 2 | 2 | 2 |
| 13 | 1 | 2 | 2 | 2 |
| 14 | 2 | 2 | 2 | 2 |
| 15 | 2 | 2 | 2 | 2 |
| 16 | 2 | 2 | 2 | 2 |
| 17 | 2 | 2 | 2 | 2 |
| 18 | 1 | 2 | 1 | 2 |
| 19 | 1 | 1 | 2 | 2 |
| 20 | 1 | 2 | 2 | 2 |
| 21 | 1 | 2 | 2 | 2 |
| 22 | 2 | 2 | 2 | 2 |
| 23 | 2 | 2 | 2 | 2 |
| 24 | 2 | 2 | 2 | 2 |
| 25 | 2 | 2 | 2 | 2 |
| 26 | 1 | 2 | 2 | 2 |
| 27 | 2 | 2 | 2 | 2 |
| 28 | 2 | 2 | 2 | 2 |
| 29 | 2 | 2 | 2 | 2 |
| 30 | 2 | 2 | 2 | 2 |
| 31 | 1 | 2 | 2 | 2 |
| 32 | 1 | 2 | 2 | 2 |
| 33 | 2 | 1 | 2 | 2 |
| 34 | 2 | 2 | 2 | 2 |
| 35 | 2 | 1 | 2 | 2 |
| 36 | 2 | 2 | 2 | 2 |
| 37 | 2 | 2 | 2 | 2 |
| 38 | 1 | 2 | 2 | 2 |
| 39 | 2 | 1 | 2 | 2 |
| 40 | 2 | 2 | 2 | 2 |
| 41 | 2 | 2 | 2 | 2 |
| 42 | 2 | 2 | 2 | 2 |
| 43 | 1 | 1 | 2 | 2 |
| 44 | 2 | 1 | 2 | 2 |
| 45 | 2 | 2 | 2 | 2 |
| 46 | 1 | 2 | 2 | 2 |
| 47 | 2 | 2 | 2 | 2 |
| 48 | 2 | 2 | 2 | 2 |
| 49 | 2 | 2 | 2 | 2 |
| 50 | 2 | 1 | 2 | 2 |
| 51 | 2 | 2 | 2 | 2 |
| 52 | 2 | 2 | 2 | 2 |
| 53 | 2 | 2 | 2 | 2 |
| 54 | 2 | 2 | 2 | 2 |
| 55 | 2 | 2 | 2 | 2 |
| 56 | 1 | 2 | 2 | 2 |
| 57 | 2 | 2 | 2 | 2 |
| 58 | 2 | 2 | 2 | 2 |
| 59 | 2 | 2 | 2 | 2 |
| 60 | 1 | 2 | 2 | 2 |
|    | 2 | 2 | 2 | 2 |

For peer review only

|    |   |   |   |   |
|----|---|---|---|---|
| 1  |   |   |   |   |
| 2  | 1 | 1 | 2 | 2 |
| 3  | 2 | 2 | 2 | 2 |
| 4  | 1 | 1 | 2 | 2 |
| 5  | 2 | 1 | 2 | 2 |
| 6  | 2 | 2 | 2 | 2 |
| 7  | 2 | 2 | 2 | 2 |
| 8  | 1 | 1 | 2 | 1 |
| 9  | 2 | 2 | 2 | 2 |
| 10 | 2 | 1 | 2 | 2 |
| 11 | 2 | 2 | 2 | 2 |
| 12 | 2 | 2 | 2 | 2 |
| 13 | 2 | 2 | 2 | 2 |
| 14 | 2 | 1 | 2 | 2 |
| 15 | 2 | 2 | 2 | 2 |
| 16 | 1 | 2 | 2 | 2 |
| 17 | 1 | 2 | 2 | 2 |
| 18 | 1 | 2 | 2 | 2 |
| 19 | 1 | 2 | 2 | 2 |
| 20 | 1 | 1 | 2 | 2 |
| 21 | 2 | 2 | 2 | 2 |
| 22 | 2 | 2 | 2 | 2 |
| 23 | 2 | 2 | 2 | 2 |
| 24 | 2 | 2 | 2 | 1 |
| 25 | 2 | 2 | 2 | 2 |
| 26 | 2 | 2 | 2 | 2 |
| 27 | 1 | 1 | 2 | 2 |
| 28 | 1 | 1 | 2 | 2 |
| 29 | 2 | 2 | 2 | 2 |
| 30 | 2 | 2 | 2 | 2 |
| 31 | 1 | 1 | 2 | 2 |
| 32 | 1 | 2 | 2 | 2 |
| 33 | 2 | 1 | 2 | 2 |
| 34 | 2 | 2 | 1 | 2 |
| 35 | 1 | 2 | 2 | 2 |
| 36 | 2 | 1 | 2 | 2 |
| 37 | 2 | 2 | 2 | 2 |
| 38 | 2 | 2 | 2 | 2 |
| 39 | 2 | 2 | 2 | 2 |
| 40 | 2 | 2 | 2 | 2 |
| 41 | 2 | 2 | 2 | 2 |
| 42 | 1 | 1 | 2 | 2 |
| 43 | 2 | 2 | 2 | 2 |
| 44 | 2 | 1 | 2 | 2 |
| 45 | 2 | 2 | 2 | 2 |
| 46 | 2 | 2 | 2 | 2 |
| 47 | 2 | 2 | 2 | 2 |
| 48 | 2 | 2 | 2 | 2 |
| 49 | 2 | 2 | 2 | 2 |
| 50 | 1 | 2 | 2 | 2 |
| 51 | 1 | 2 | 2 | 2 |
| 52 | 1 | 2 | 2 | 2 |
| 53 | 1 | 2 | 2 | 2 |
| 54 | 2 | 1 | 2 | 2 |
| 55 | 1 | 2 | 2 | 2 |
| 56 | 1 | 2 | 1 | 2 |
| 57 | 2 | 2 | 2 | 2 |
| 58 | 2 | 1 | 2 | 2 |
| 59 | 2 | 2 | 2 | 2 |
| 60 | 1 | 2 | 1 | 2 |
|    | 1 | 2 | 2 | 2 |

|    |   |   |   |   |
|----|---|---|---|---|
| 1  |   |   |   |   |
| 2  | 1 | 2 | 2 | 2 |
| 3  | 1 | 2 | 2 | 2 |
| 4  | 2 | 2 | 2 | 2 |
| 5  | 1 | 1 | 2 | 2 |
| 6  | 2 | 1 | 2 | 2 |
| 7  | 2 | 2 | 2 | 2 |
| 8  | 2 | 2 | 2 | 2 |
| 9  | 2 | 2 | 2 | 2 |
| 10 | 1 | 2 | 1 | 2 |
| 11 | 1 | 2 | 2 | 2 |
| 12 | 2 | 2 | 2 | 1 |
| 13 | 1 | 2 | 2 | 2 |
| 14 | 2 | 2 | 2 | 2 |
| 15 | 2 | 2 | 2 | 2 |
| 16 | 2 | 1 | 2 | 2 |
| 17 | 1 | 2 | 2 | 2 |
| 18 | 2 | 2 | 2 | 2 |
| 19 | 1 | 2 | 2 | 2 |
| 20 | 1 | 2 | 2 | 2 |
| 21 | 1 | 1 | 2 | 2 |
| 22 | 2 | 2 | 2 | 2 |
| 23 | 2 | 2 | 2 | 2 |
| 24 | 1 | 2 | 2 | 2 |
| 25 | 1 | 2 | 2 | 2 |
| 26 | 1 | 2 | 2 | 2 |
| 27 | 1 | 2 | 1 | 2 |
| 28 | 1 | 2 | 2 | 2 |
| 29 | 2 | 2 | 2 | 2 |
| 30 | 2 | 2 | 2 | 2 |
| 31 | 1 | 2 | 2 | 2 |
| 32 | 1 | 2 | 2 | 2 |
| 33 | 1 | 2 | 2 | 2 |
| 34 | 1 | 2 | 2 | 2 |
| 35 | 1 | 2 | 2 | 2 |
| 36 | 1 | 2 | 2 | 2 |
| 37 | 1 | 2 | 2 | 2 |
| 38 | 1 | 1 | 2 | 2 |
| 39 | 2 | 1 | 2 | 2 |
| 40 | 1 | 2 | 2 | 2 |
| 41 | 1 | 2 | 2 | 2 |
| 42 | 1 | 2 | 2 | 2 |
| 43 | 1 | 2 | 2 | 2 |
| 44 | 1 | 2 | 2 | 2 |
| 45 | 2 | 2 | 2 | 2 |
| 46 | 1 | 2 | 2 | 2 |
| 47 | 1 | 1 | 2 | 2 |
| 48 | 2 | 2 | 1 | 2 |
| 49 | 1 | 1 | 2 | 2 |
| 50 | 1 | 2 | 2 | 2 |
| 51 | 2 | 2 | 2 | 2 |
| 52 | 1 | 2 | 2 | 2 |
| 53 | 1 | 2 | 2 | 2 |
| 54 | 1 | 2 | 2 | 2 |
| 55 | 1 | 2 | 2 | 2 |
| 56 | 1 | 2 | 2 | 2 |
| 57 | 1 | 1 | 2 | 2 |
| 58 | 1 | 2 | 2 | 2 |
| 59 | 1 | 1 | 2 | 2 |
| 60 | 1 | 1 | 2 | 2 |

For peer review only

|    |   |   |   |   |
|----|---|---|---|---|
| 1  |   |   |   |   |
| 2  | 2 | 2 | 2 | 2 |
| 3  | 1 | 2 | 2 | 2 |
| 4  | 1 | 2 | 2 | 2 |
| 5  | 1 | 2 | 2 | 2 |
| 6  |   |   |   |   |
| 7  | 2 | 2 | 2 | 2 |
| 8  | 1 | 1 | 2 | 2 |
| 9  | 2 | 2 | 2 | 1 |
| 10 | 1 | 2 | 2 | 2 |
| 11 | 1 | 2 | 1 | 2 |
| 12 | 1 | 2 | 2 | 2 |
| 13 | 1 | 2 | 2 | 2 |
| 14 | 1 | 2 | 2 | 2 |
| 15 | 1 | 2 | 2 | 2 |
| 16 | 2 | 2 | 2 | 2 |
| 17 | 1 | 2 | 2 | 2 |
| 18 | 1 | 1 | 2 | 2 |
| 19 | 1 | 2 | 2 | 2 |
| 20 | 1 | 2 | 2 | 2 |
| 21 | 1 | 2 | 2 | 2 |
| 22 | 1 | 2 | 1 | 2 |
| 23 | 1 | 2 | 2 | 2 |
| 24 | 1 | 2 | 2 | 2 |
| 25 | 1 | 2 | 2 | 2 |
| 26 | 1 | 2 | 2 | 2 |
| 27 | 1 | 2 | 2 | 2 |
| 28 | 2 | 2 | 2 | 2 |
| 29 | 1 | 1 | 2 | 2 |
| 30 | 1 | 2 | 2 | 2 |
| 31 | 1 | 2 | 2 | 2 |
| 32 | 1 | 2 | 2 | 2 |
| 33 | 1 | 2 | 2 | 1 |
| 34 | 1 | 1 | 1 | 2 |
| 35 | 1 | 2 | 2 | 2 |
| 36 | 1 | 2 | 1 | 2 |
| 37 | 1 | 2 | 2 | 2 |
| 38 | 1 | 1 | 2 | 2 |
| 39 | 1 | 2 | 1 | 2 |
| 40 | 1 | 2 | 2 | 2 |
| 41 | 1 | 2 | 2 | 2 |
| 42 | 1 | 2 | 2 | 2 |
| 43 | 1 | 2 | 2 | 2 |
| 44 | 1 | 2 | 2 | 1 |
| 45 | 1 | 1 | 2 | 2 |
| 46 | 1 | 2 | 2 | 2 |
| 47 | 1 | 2 | 2 | 2 |
| 48 | 1 | 2 | 2 | 2 |
| 49 | 1 | 1 | 2 | 2 |
| 50 | 1 | 2 | 2 | 2 |
| 51 | 1 | 2 | 1 | 2 |
| 52 | 1 | 2 | 2 | 2 |
| 53 | 1 | 2 | 2 | 2 |
| 54 | 1 | 2 | 2 | 2 |
| 55 | 2 | 2 | 2 | 2 |
| 56 | 1 | 2 | 2 | 2 |
| 57 | 1 | 2 | 2 | 2 |
| 58 | 1 | 2 | 2 | 2 |
| 59 | 1 | 2 | 2 | 2 |
| 60 | 1 | 2 | 2 | 2 |
|    | 1 | 2 | 2 | 2 |

|    |   |   |   |   |
|----|---|---|---|---|
| 1  |   |   |   |   |
| 2  | 1 | 1 | 2 | 2 |
| 3  | 1 | 2 | 2 | 2 |
| 4  | 1 | 2 | 2 | 2 |
| 5  | 1 | 2 | 2 | 2 |
| 6  | 1 | 2 | 1 | 2 |
| 7  | 1 | 2 | 2 | 2 |
| 8  | 1 | 2 | 2 | 2 |
| 9  | 1 | 2 | 2 | 2 |
| 10 | 1 | 2 | 2 | 2 |
| 11 | 1 | 2 | 2 | 2 |
| 12 | 1 | 2 | 2 | 2 |
| 13 | 1 | 2 | 2 | 2 |
| 14 | 1 | 2 | 2 | 2 |
| 15 | 1 | 2 | 2 | 2 |
| 16 | 1 | 2 | 2 | 2 |
| 17 | 1 | 2 | 2 | 2 |
| 18 | 1 | 2 | 2 | 2 |
| 19 | 1 | 2 | 1 | 2 |
| 20 | 1 | 2 | 2 | 2 |
| 21 | 1 | 2 | 2 | 2 |
| 22 | 1 | 2 | 1 | 2 |
| 23 | 1 | 2 | 2 | 2 |
| 24 | 1 | 2 | 2 | 2 |
| 25 | 1 | 2 | 2 | 2 |
| 26 | 1 | 2 | 1 | 2 |
| 27 | 2 | 2 | 2 | 2 |
| 28 | 1 | 1 | 1 | 2 |
| 29 | 1 | 2 | 1 | 2 |
| 30 | 1 | 2 | 2 | 2 |
| 31 | 1 | 2 | 2 | 2 |
| 32 | 1 | 2 | 2 | 2 |
| 33 | 2 | 2 | 2 | 2 |
| 34 | 1 | 2 | 2 | 2 |
| 35 | 1 | 1 | 1 | 2 |
| 36 | 1 | 2 | 2 | 2 |
| 37 | 1 | 2 | 2 | 2 |
| 38 | 1 | 2 | 2 | 2 |
| 39 | 1 | 2 | 2 | 2 |
| 40 | 1 | 2 | 1 | 2 |
| 41 | 1 | 2 | 2 | 2 |
| 42 | 1 | 2 | 2 | 2 |
| 43 | 1 | 2 | 2 | 2 |
| 44 | 1 | 2 | 2 | 2 |
| 45 | 2 | 2 | 2 | 2 |
| 46 | 1 | 2 | 2 | 2 |
| 47 | 1 | 2 | 1 | 2 |
| 48 | 1 | 2 | 2 | 2 |
| 49 | 2 | 2 | 2 | 2 |
| 50 | 2 | 2 | 2 | 2 |
| 51 | 2 | 2 | 2 | 2 |
| 52 | 2 | 2 | 2 | 2 |
| 53 | 2 | 2 | 2 | 2 |
| 54 | 2 | 2 | 2 | 2 |
| 55 | 1 | 2 | 2 | 2 |
| 56 | 2 | 2 | 2 | 2 |
| 57 | 2 | 1 | 2 | 2 |
| 58 | 1 | 2 | 2 | 2 |
| 59 | 2 | 2 | 2 | 2 |
| 60 | 2 | 2 | 2 | 2 |

For peer review only

|    |   |   |   |   |
|----|---|---|---|---|
| 1  |   |   |   |   |
| 2  | 2 | 2 | 2 | 2 |
| 3  | 1 | 2 | 2 | 2 |
| 4  | 2 | 2 | 2 | 2 |
| 5  | 1 | 2 | 1 | 2 |
| 6  | 2 | 2 | 2 | 2 |
| 7  | 2 | 1 | 1 | 2 |
| 8  | 2 | 1 | 2 | 2 |
| 9  | 2 | 2 | 2 | 2 |
| 10 | 2 | 2 | 2 | 2 |
| 11 | 2 | 2 | 2 | 2 |
| 12 | 2 | 2 | 2 | 2 |
| 13 | 2 | 2 | 2 | 2 |
| 14 | 2 | 1 | 2 | 2 |
| 15 | 2 | 1 | 2 | 2 |
| 16 | 2 | 2 | 2 | 2 |
| 17 | 1 | 2 | 2 | 2 |
| 18 | 1 | 2 | 2 | 2 |
| 19 | 1 | 2 | 2 | 2 |
| 20 | 1 | 2 | 2 | 2 |
| 21 | 1 | 2 | 2 | 1 |
| 22 | 1 | 2 | 2 | 2 |
| 23 | 1 | 1 | 2 | 2 |
| 24 | 2 | 2 | 2 | 2 |
| 25 | 2 | 2 | 2 | 2 |
| 26 | 2 | 2 | 2 | 2 |
| 27 | 1 | 1 | 2 | 1 |
| 28 | 1 | 2 | 2 | 2 |
| 29 | 1 | 1 | 2 | 2 |
| 30 | 2 | 2 | 2 | 2 |
| 31 | 1 | 1 | 2 | 2 |
| 32 | 2 | 2 | 2 | 2 |
| 33 | 2 | 1 | 2 | 2 |
| 34 | 1 | 1 | 2 | 2 |
| 35 | 2 | 1 | 2 | 2 |
| 36 | 2 | 2 | 2 | 2 |
| 37 | 2 | 2 | 2 | 2 |
| 38 | 2 | 1 | 2 | 2 |
| 39 | 2 | 2 | 2 | 2 |
| 40 | 2 | 2 | 2 | 2 |
| 41 | 2 | 1 | 2 | 2 |
| 42 | 2 | 2 | 1 | 2 |
| 43 | 2 | 1 | 1 | 1 |
| 44 | 2 | 2 | 2 | 2 |
| 45 | 2 | 1 | 2 | 1 |
| 46 | 2 | 2 | 2 | 2 |
| 47 | 2 | 2 | 2 | 2 |
| 48 | 2 | 2 | 2 | 2 |
| 49 | 2 | 1 | 2 | 2 |
| 50 | 2 | 2 | 2 | 2 |
| 51 | 1 | 1 | 2 | 2 |
| 52 | 1 | 2 | 2 | 2 |
| 53 | 2 | 2 | 2 | 2 |
| 54 | 2 | 2 | 2 | 2 |
| 55 | 2 | 2 | 2 | 2 |
| 56 | 1 | 2 | 2 | 2 |
| 57 | 1 | 2 | 2 | 2 |
| 58 | 1 | 1 | 2 | 2 |
| 59 | 1 | 1 | 2 | 2 |
| 60 | 1 | 1 | 2 | 2 |



|    |   |   |   |   |
|----|---|---|---|---|
| 1  |   |   |   |   |
| 2  | 1 | 2 | 2 | 2 |
| 3  | 2 | 2 | 2 | 2 |
| 4  | 2 | 2 | 2 | 2 |
| 5  | 2 | 2 | 2 | 2 |
| 6  | 2 | 2 | 2 | 2 |
| 7  | 2 | 2 | 2 | 2 |
| 8  | 2 | 2 | 2 | 2 |
| 9  | 2 | 2 | 2 | 2 |
| 10 | 2 | 1 | 2 | 2 |
| 11 | 2 | 2 | 2 | 2 |
| 12 | 2 | 1 | 2 | 2 |
| 13 | 2 | 2 | 2 | 2 |
| 14 | 2 | 2 | 2 | 2 |
| 15 | 1 | 2 | 2 | 2 |
| 16 | 2 | 2 | 2 | 1 |
| 17 | 2 | 2 | 2 | 2 |
| 18 | 1 | 2 | 2 | 2 |
| 19 | 2 | 2 | 2 | 2 |
| 20 | 2 | 2 | 2 | 2 |
| 21 | 1 | 2 | 2 | 2 |
| 22 | 2 | 1 | 1 | 2 |
| 23 | 2 | 2 | 2 | 1 |
| 24 | 2 | 2 | 2 | 2 |
| 25 | 2 | 1 | 2 | 2 |
| 26 | 2 | 2 | 2 | 2 |
| 27 | 2 | 2 | 2 | 2 |
| 28 | 1 | 2 | 2 | 1 |
| 29 | 2 | 2 | 2 | 2 |
| 30 | 2 | 1 | 2 | 2 |
| 31 | 1 | 2 | 2 | 1 |
| 32 | 2 | 2 | 2 | 2 |
| 33 | 2 | 2 | 2 | 2 |
| 34 | 2 | 2 | 2 | 2 |
| 35 | 2 | 2 | 2 | 2 |
| 36 | 2 | 2 | 2 | 2 |
| 37 | 2 | 2 | 2 | 2 |
| 38 | 2 | 2 | 2 | 2 |
| 39 | 2 | 2 | 2 | 2 |
| 40 | 2 | 2 | 2 | 2 |
| 41 | 1 | 2 | 2 | 2 |
| 42 | 1 | 2 | 2 | 2 |
| 43 | 2 | 1 | 2 | 2 |
| 44 | 1 | 2 | 2 | 2 |
| 45 | 2 | 1 | 2 | 2 |
| 46 | 1 | 2 | 2 | 2 |
| 47 | 2 | 1 | 2 | 2 |
| 48 | 1 | 2 | 2 | 2 |
| 49 | 2 | 2 | 2 | 2 |
| 50 | 1 | 2 | 2 | 2 |
| 51 | 2 | 2 | 2 | 2 |
| 52 | 2 | 1 | 2 | 2 |
| 53 | 2 | 1 | 2 | 2 |
| 54 | 1 | 2 | 2 | 2 |
| 55 | 2 | 2 | 2 | 2 |
| 56 | 1 | 1 | 2 | 1 |
| 57 | 2 | 1 | 2 | 2 |
| 58 | 1 | 2 | 2 | 2 |
| 59 | 2 | 1 | 2 | 2 |
| 60 | 1 | 2 | 2 | 2 |
|    | 2 | 1 | 2 | 2 |

For peer review only

|    |   |   |   |   |
|----|---|---|---|---|
| 1  |   |   |   |   |
| 2  | 1 | 2 | 2 | 2 |
| 3  | 2 | 1 | 2 | 1 |
| 4  |   |   |   |   |
| 5  |   |   |   |   |
| 6  |   |   |   |   |
| 7  |   |   |   |   |
| 8  |   |   |   |   |
| 9  |   |   |   |   |
| 10 |   |   |   |   |
| 11 |   |   |   |   |
| 12 |   |   |   |   |
| 13 |   |   |   |   |
| 14 |   |   |   |   |
| 15 |   |   |   |   |
| 16 |   |   |   |   |
| 17 |   |   |   |   |
| 18 |   |   |   |   |
| 19 |   |   |   |   |
| 20 |   |   |   |   |
| 21 |   |   |   |   |
| 22 |   |   |   |   |
| 23 |   |   |   |   |
| 24 |   |   |   |   |
| 25 |   |   |   |   |
| 26 |   |   |   |   |
| 27 |   |   |   |   |
| 28 |   |   |   |   |
| 29 |   |   |   |   |
| 30 |   |   |   |   |
| 31 |   |   |   |   |
| 32 |   |   |   |   |
| 33 |   |   |   |   |
| 34 |   |   |   |   |
| 35 |   |   |   |   |
| 36 |   |   |   |   |
| 37 |   |   |   |   |
| 38 |   |   |   |   |
| 39 |   |   |   |   |
| 40 |   |   |   |   |
| 41 |   |   |   |   |
| 42 |   |   |   |   |
| 43 |   |   |   |   |
| 44 |   |   |   |   |
| 45 |   |   |   |   |
| 46 |   |   |   |   |
| 47 |   |   |   |   |
| 48 |   |   |   |   |
| 49 |   |   |   |   |
| 50 |   |   |   |   |
| 51 |   |   |   |   |
| 52 |   |   |   |   |
| 53 |   |   |   |   |
| 54 |   |   |   |   |
| 55 |   |   |   |   |
| 56 |   |   |   |   |
| 57 |   |   |   |   |
| 58 |   |   |   |   |
| 59 |   |   |   |   |
| 60 |   |   |   |   |

For peer review only

|    | PN | PAD | Deformity | HO_Amputation |
|----|----|-----|-----------|---------------|
| 1  |    |     |           |               |
| 2  |    |     |           |               |
| 3  |    |     |           |               |
| 4  | 1  | 2   | 1         | 2             |
| 5  | 2  | 2   | 1         | 2             |
| 6  | 2  | 2   | 2         | 2             |
| 7  | 2  | 2   | 2         | 2             |
| 8  | 1  | 2   | 1         | 2             |
| 9  | 2  | 2   | 1         | 2             |
| 10 | 2  | 2   | 2         | 2             |
| 11 | 2  | 2   | 1         | 2             |
| 12 | 2  | 2   | 2         | 2             |
| 13 | 1  | 2   | 2         | 1             |
| 14 | 2  | 2   | 1         | 2             |
| 15 | 2  | 2   | 2         | 2             |
| 16 | 1  | 2   | 2         | 2             |
| 17 | 1  | 2   | 2         | 2             |
| 18 | 1  | 2   | 2         | 2             |
| 19 | 1  | 2   | 2         | 2             |
| 20 | 2  | 2   | 2         | 2             |
| 21 | 2  | 2   | 1         | 2             |
| 22 | 2  | 2   | 1         | 2             |
| 23 | 2  | 2   | 2         | 2             |
| 24 | 2  | 2   | 2         | 2             |
| 25 | 2  | 2   | 1         | 2             |
| 26 | 2  | 2   | 2         | 2             |
| 27 | 2  | 2   | 1         | 1             |
| 28 | 2  | 2   | 2         | 1             |
| 29 | 2  | 2   | 2         | 2             |
| 30 | 1  | 2   | 1         | 2             |
| 31 | 2  | 2   | 2         | 2             |
| 32 | 2  | 2   | 2         | 2             |
| 33 | 1  | 2   | 2         | 2             |
| 34 | 2  | 2   | 2         | 2             |
| 35 | 2  | 2   | 1         | 2             |
| 36 | 2  | 2   | 2         | 2             |
| 37 | 2  | 2   | 2         | 2             |
| 38 | 2  | 2   | 1         | 2             |
| 39 | 2  | 2   | 2         | 2             |
| 40 | 2  | 2   | 1         | 2             |
| 41 | 2  | 2   | 1         | 2             |
| 42 | 2  | 2   | 2         | 2             |
| 43 | 2  | 2   | 2         | 2             |
| 44 | 1  | 2   | 1         | 2             |
| 45 | 2  | 2   | 1         | 2             |
| 46 | 2  | 2   | 1         | 2             |
| 47 | 2  | 2   | 2         | 2             |
| 48 | 2  | 2   | 2         | 2             |
| 49 | 1  | 2   | 1         | 2             |
| 50 | 2  | 2   | 2         | 2             |
| 51 | 2  | 2   | 2         | 2             |
| 52 | 2  | 2   | 2         | 2             |
| 53 | 2  | 2   | 2         | 2             |
| 54 | 2  | 2   | 2         | 2             |
| 55 | 2  | 2   | 2         | 2             |
| 56 | 2  | 2   | 1         | 2             |
| 57 | 2  | 2   | 1         | 2             |
| 58 | 2  | 2   | 1         | 1             |
| 59 | 2  | 2   | 2         | 2             |
| 60 | 2  | 2   | 2         | 1             |

|    |   |   |   |   |
|----|---|---|---|---|
| 1  |   |   |   |   |
| 2  | 2 | 2 | 2 | 1 |
| 3  | 2 | 2 | 2 | 2 |
| 4  | 2 | 2 | 2 | 2 |
| 5  | 2 | 2 | 2 | 2 |
| 6  | 2 | 2 | 2 | 2 |
| 7  | 1 | 2 | 2 | 2 |
| 8  | 2 | 2 | 2 | 2 |
| 9  | 2 | 2 | 1 | 2 |
| 10 | 2 | 2 | 2 | 1 |
| 11 | 1 | 2 | 1 | 2 |
| 12 | 2 | 2 | 2 | 2 |
| 13 | 2 | 2 | 2 | 2 |
| 14 | 2 | 2 | 2 | 2 |
| 15 | 2 | 2 | 1 | 2 |
| 16 | 2 | 2 | 2 | 1 |
| 17 | 2 | 2 | 2 | 2 |
| 18 | 2 | 2 | 1 | 2 |
| 19 | 2 | 2 | 2 | 1 |
| 20 | 2 | 2 | 2 | 1 |
| 21 | 2 | 2 | 2 | 1 |
| 22 | 2 | 2 | 1 | 2 |
| 23 | 2 | 2 | 2 | 2 |
| 24 | 2 | 2 | 1 | 1 |
| 25 | 2 | 2 | 2 | 2 |
| 26 | 1 | 2 | 2 | 2 |
| 27 | 2 | 2 | 2 | 2 |
| 28 | 2 | 2 | 2 | 1 |
| 29 | 2 | 2 | 1 | 2 |
| 30 | 2 | 2 | 1 | 2 |
| 31 | 2 | 2 | 2 | 2 |
| 32 | 1 | 2 | 2 | 2 |
| 33 | 2 | 2 | 1 | 2 |
| 34 | 2 | 2 | 1 | 2 |
| 35 | 2 | 2 | 2 | 2 |
| 36 | 2 | 2 | 2 | 2 |
| 37 | 1 | 2 | 2 | 2 |
| 38 | 2 | 2 | 1 | 2 |
| 39 | 2 | 2 | 2 | 2 |
| 40 | 1 | 2 | 2 | 2 |
| 41 | 2 | 2 | 2 | 2 |
| 42 | 2 | 2 | 2 | 2 |
| 43 | 2 | 2 | 2 | 2 |
| 44 | 2 | 2 | 2 | 2 |
| 45 | 2 | 2 | 2 | 2 |
| 46 | 2 | 2 | 1 | 1 |
| 47 | 2 | 2 | 1 | 2 |
| 48 | 2 | 2 | 2 | 2 |
| 49 | 2 | 2 | 2 | 2 |
| 50 | 2 | 2 | 2 | 2 |
| 51 | 2 | 2 | 1 | 2 |
| 52 | 2 | 2 | 1 | 2 |
| 53 | 2 | 2 | 1 | 2 |
| 54 | 2 | 2 | 1 | 2 |
| 55 | 1 | 2 | 1 | 2 |
| 56 | 2 | 2 | 1 | 2 |
| 57 | 2 | 2 | 1 | 2 |
| 58 | 1 | 2 | 2 | 2 |
| 59 | 2 | 2 | 1 | 2 |
| 60 | 2 | 2 | 1 | 2 |

|    |   |   |   |   |
|----|---|---|---|---|
| 1  |   |   |   |   |
| 2  | 2 | 2 | 2 | 2 |
| 3  | 2 | 2 | 1 | 2 |
| 4  | 2 | 2 | 2 | 2 |
| 5  | 1 | 2 | 2 | 2 |
| 6  | 2 | 2 | 2 | 2 |
| 7  | 2 | 2 | 2 | 2 |
| 8  | 2 | 2 | 2 | 2 |
| 9  | 2 | 2 | 1 | 1 |
| 10 | 2 | 2 | 1 | 2 |
| 11 | 2 | 2 | 2 | 2 |
| 12 | 1 | 2 | 1 | 2 |
| 13 | 2 | 2 | 1 | 2 |
| 14 | 2 | 2 | 1 | 2 |
| 15 | 2 | 2 | 1 | 2 |
| 16 | 2 | 2 | 1 | 2 |
| 17 | 1 | 2 | 1 | 2 |
| 18 | 1 | 2 | 1 | 2 |
| 19 | 1 | 2 | 1 | 2 |
| 20 | 1 | 2 | 2 | 2 |
| 21 | 2 | 2 | 2 | 2 |
| 22 | 2 | 2 | 1 | 2 |
| 23 | 2 | 2 | 1 | 2 |
| 24 | 2 | 2 | 1 | 2 |
| 25 | 2 | 2 | 1 | 2 |
| 26 | 2 | 2 | 1 | 2 |
| 27 | 2 | 2 | 1 | 1 |
| 28 | 1 | 2 | 2 | 1 |
| 29 | 2 | 2 | 2 | 2 |
| 30 | 2 | 2 | 2 | 2 |
| 31 | 2 | 2 | 2 | 2 |
| 32 | 2 | 2 | 2 | 2 |
| 33 | 2 | 2 | 1 | 2 |
| 34 | 2 | 2 | 1 | 2 |
| 35 | 1 | 2 | 1 | 2 |
| 36 | 1 | 2 | 2 | 2 |
| 37 | 1 | 2 | 2 | 2 |
| 38 | 2 | 2 | 2 | 2 |
| 39 | 2 | 2 | 1 | 2 |
| 40 | 2 | 2 | 2 | 2 |
| 41 | 1 | 2 | 2 | 1 |
| 42 | 2 | 2 | 1 | 2 |
| 43 | 2 | 2 | 2 | 2 |
| 44 | 1 | 2 | 1 | 2 |
| 45 | 2 | 2 | 2 | 1 |
| 46 | 1 | 2 | 2 | 2 |
| 47 | 1 | 2 | 2 | 2 |
| 48 | 2 | 2 | 2 | 2 |
| 49 | 2 | 2 | 2 | 2 |
| 50 | 2 | 2 | 2 | 2 |
| 51 | 2 | 2 | 1 | 2 |
| 52 | 2 | 2 | 2 | 2 |
| 53 | 1 | 2 | 1 | 2 |
| 54 | 2 | 2 | 2 | 2 |
| 55 | 1 | 2 | 2 | 2 |
| 56 | 2 | 2 | 1 | 2 |
| 57 | 1 | 2 | 2 | 1 |
| 58 | 2 | 2 | 1 | 1 |
| 59 | 1 | 2 | 2 | 1 |
| 60 | 2 | 2 | 1 | 1 |
|    | 2 | 2 | 1 | 1 |

For peer review only

|    |   |   |   |   |
|----|---|---|---|---|
| 1  |   |   |   |   |
| 2  | 2 | 2 | 2 | 2 |
| 3  | 2 | 2 | 1 | 2 |
| 4  | 2 | 2 | 1 | 2 |
| 5  | 2 | 2 | 1 | 1 |
| 6  | 2 | 2 | 1 | 2 |
| 7  | 2 | 2 | 1 | 2 |
| 8  | 1 | 2 | 1 | 2 |
| 9  | 2 | 2 | 1 | 2 |
| 10 | 1 | 2 | 1 | 2 |
| 11 | 1 | 2 | 1 | 2 |
| 12 | 2 | 2 | 1 | 1 |
| 13 | 2 | 2 | 1 | 2 |
| 14 | 2 | 2 | 1 | 2 |
| 15 | 1 | 2 | 1 | 2 |
| 16 | 2 | 2 | 1 | 2 |
| 17 | 2 | 2 | 1 | 2 |
| 18 | 2 | 2 | 1 | 2 |
| 19 | 2 | 2 | 1 | 2 |
| 20 | 2 | 2 | 2 | 2 |
| 21 | 2 | 2 | 1 | 2 |
| 22 | 2 | 2 | 1 | 1 |
| 23 | 1 | 2 | 1 | 2 |
| 24 | 2 | 2 | 1 | 2 |
| 25 | 2 | 2 | 1 | 2 |
| 26 | 1 | 2 | 1 | 2 |
| 27 | 2 | 2 | 1 | 2 |
| 28 | 2 | 2 | 2 | 2 |
| 29 | 2 | 2 | 1 | 2 |
| 30 | 2 | 2 | 1 | 1 |
| 31 | 2 | 2 | 1 | 2 |
| 32 | 2 | 2 | 1 | 2 |
| 33 | 1 | 2 | 1 | 2 |
| 34 | 2 | 2 | 1 | 2 |
| 35 | 2 | 2 | 1 | 2 |
| 36 | 2 | 2 | 1 | 2 |
| 37 | 2 | 2 | 1 | 2 |
| 38 | 2 | 2 | 1 | 2 |
| 39 | 2 | 2 | 1 | 2 |
| 40 | 2 | 2 | 1 | 2 |
| 41 | 2 | 2 | 1 | 1 |
| 42 | 2 | 2 | 1 | 2 |
| 43 | 2 | 2 | 1 | 2 |
| 44 | 1 | 2 | 1 | 2 |
| 45 | 2 | 2 | 1 | 2 |
| 46 | 2 | 2 | 1 | 1 |
| 47 | 2 | 2 | 1 | 2 |
| 48 | 2 | 2 | 1 | 2 |
| 49 | 1 | 2 | 2 | 2 |
| 50 | 2 | 2 | 1 | 2 |
| 51 | 1 | 2 | 1 | 2 |
| 52 | 2 | 2 | 1 | 2 |
| 53 | 2 | 2 | 1 | 2 |
| 54 | 2 | 2 | 1 | 2 |
| 55 | 2 | 2 | 1 | 2 |
| 56 | 2 | 2 | 2 | 2 |
| 57 | 2 | 2 | 2 | 2 |
| 58 | 2 | 2 | 1 | 2 |
| 59 | 2 | 2 | 2 | 2 |
| 60 | 2 | 2 | 1 | 2 |

|    |   |   |   |   |
|----|---|---|---|---|
| 1  |   |   |   |   |
| 2  | 2 | 2 | 1 | 1 |
| 3  | 1 | 2 | 1 | 2 |
| 4  | 2 | 2 | 2 | 2 |
| 5  | 2 | 2 | 1 | 2 |
| 6  | 2 | 2 | 1 | 2 |
| 7  | 2 | 2 | 1 | 2 |
| 8  | 1 | 2 | 1 | 1 |
| 9  | 2 | 2 | 1 | 2 |
| 10 | 2 | 2 | 1 | 2 |
| 11 | 2 | 2 | 1 | 1 |
| 12 | 2 | 2 | 1 | 2 |
| 13 | 2 | 2 | 1 | 2 |
| 14 | 1 | 2 | 1 | 2 |
| 15 | 2 | 2 | 1 | 2 |
| 16 | 2 | 2 | 2 | 2 |
| 17 | 2 | 2 | 1 | 2 |
| 18 | 1 | 2 | 1 | 2 |
| 19 | 2 | 2 | 1 | 2 |
| 20 | 2 | 2 | 1 | 2 |
| 21 | 1 | 2 | 2 | 2 |
| 22 | 2 | 2 | 1 | 2 |
| 23 | 1 | 2 | 1 | 2 |
| 24 | 2 | 2 | 1 | 2 |
| 25 | 2 | 2 | 1 | 2 |
| 26 | 2 | 2 | 1 | 2 |
| 27 | 2 | 2 | 2 | 2 |
| 28 | 2 | 2 | 2 | 2 |
| 29 | 1 | 2 | 2 | 2 |
| 30 | 1 | 2 | 1 | 2 |
| 31 | 2 | 2 | 1 | 2 |
| 32 | 2 | 2 | 2 | 2 |
| 33 | 2 | 2 | 1 | 2 |
| 34 | 1 | 2 | 1 | 2 |
| 35 | 1 | 2 | 1 | 2 |
| 36 | 2 | 2 | 1 | 2 |
| 37 | 2 | 2 | 1 | 2 |
| 38 | 2 | 2 | 1 | 2 |
| 39 | 2 | 2 | 1 | 2 |
| 40 | 2 | 2 | 1 | 2 |
| 41 | 2 | 2 | 1 | 2 |
| 42 | 2 | 2 | 1 | 2 |
| 43 | 2 | 2 | 1 | 2 |
| 44 | 2 | 2 | 1 | 2 |
| 45 | 2 | 2 | 2 | 2 |
| 46 | 2 | 2 | 2 | 2 |
| 47 | 2 | 2 | 1 | 2 |
| 48 | 2 | 2 | 1 | 2 |
| 49 | 2 | 2 | 1 | 2 |
| 50 | 2 | 2 | 1 | 1 |
| 51 | 2 | 2 | 2 | 1 |
| 52 | 2 | 2 | 1 | 2 |
| 53 | 2 | 2 | 1 | 2 |
| 54 | 2 | 2 | 1 | 2 |
| 55 | 2 | 2 | 1 | 2 |
| 56 | 2 | 2 | 2 | 2 |
| 57 | 2 | 2 | 1 | 2 |
| 58 | 2 | 2 | 1 | 2 |
| 59 | 2 | 2 | 1 | 2 |
| 60 | 2 | 2 | 1 | 2 |
|    | 2 | 2 | 2 | 2 |

For peer review only

|    |   |   |   |   |
|----|---|---|---|---|
| 1  |   |   |   |   |
| 2  | 2 | 2 | 1 | 1 |
| 3  | 2 | 2 | 1 | 2 |
| 4  | 2 | 2 | 1 | 2 |
| 5  | 1 | 2 | 1 | 2 |
| 6  | 2 | 2 | 1 | 2 |
| 7  | 2 | 2 | 1 | 2 |
| 8  | 2 | 2 | 1 | 2 |
| 9  | 2 | 2 | 1 | 2 |
| 10 | 1 | 2 | 1 | 2 |
| 11 | 2 | 2 | 1 | 2 |
| 12 | 2 | 2 | 1 | 2 |
| 13 | 2 | 2 | 1 | 2 |
| 14 | 2 | 2 | 1 | 2 |
| 15 | 2 | 2 | 1 | 2 |
| 16 | 2 | 2 | 1 | 2 |
| 17 | 2 | 2 | 1 | 2 |
| 18 | 2 | 2 | 1 | 2 |
| 19 | 1 | 2 | 1 | 2 |
| 20 | 2 | 2 | 1 | 2 |
| 21 | 2 | 2 | 1 | 2 |
| 22 | 2 | 2 | 1 | 2 |
| 23 | 2 | 2 | 1 | 2 |
| 24 | 2 | 2 | 1 | 2 |
| 25 | 1 | 2 | 1 | 2 |
| 26 | 1 | 2 | 1 | 2 |
| 27 | 2 | 2 | 1 | 2 |
| 28 | 2 | 2 | 1 | 2 |
| 29 | 2 | 2 | 1 | 2 |
| 30 | 2 | 2 | 1 | 2 |
| 31 | 2 | 2 | 1 | 2 |
| 32 | 2 | 2 | 2 | 2 |
| 33 | 2 | 2 | 1 | 2 |
| 34 | 2 | 2 | 1 | 2 |
| 35 | 2 | 2 | 1 | 2 |
| 36 | 2 | 2 | 1 | 2 |
| 37 | 2 | 2 | 1 | 2 |
| 38 | 2 | 2 | 1 | 2 |
| 39 | 2 | 2 | 1 | 2 |
| 40 | 2 | 2 | 1 | 2 |
| 41 | 2 | 2 | 1 | 2 |
| 42 | 1 | 2 | 1 | 2 |
| 43 | 2 | 2 | 2 | 2 |
| 44 | 2 | 2 | 1 | 2 |
| 45 | 2 | 2 | 1 | 2 |
| 46 | 2 | 2 | 2 | 2 |
| 47 | 2 | 2 | 1 | 2 |
| 48 | 2 | 2 | 1 | 2 |
| 49 | 2 | 2 | 1 | 2 |
| 50 | 2 | 2 | 1 | 2 |
| 51 | 2 | 2 | 1 | 2 |
| 52 | 2 | 2 | 1 | 1 |
| 53 | 2 | 2 | 1 | 2 |
| 54 | 2 | 2 | 1 | 2 |
| 55 | 2 | 2 | 2 | 2 |
| 56 | 2 | 2 | 2 | 1 |
| 57 | 2 | 2 | 1 | 2 |
| 58 | 2 | 2 | 1 | 2 |
| 59 | 2 | 2 | 1 | 2 |
| 60 | 1 | 2 | 1 | 2 |
|    | 2 | 2 | 1 | 2 |



|    |   |   |   |   |
|----|---|---|---|---|
| 1  |   |   |   |   |
| 2  | 2 | 2 | 1 | 2 |
| 3  | 2 | 2 | 2 | 2 |
| 4  | 2 | 2 | 1 | 2 |
| 5  | 2 | 2 | 2 | 2 |
| 6  | 2 | 2 | 2 | 2 |
| 7  | 1 | 2 | 1 | 1 |
| 8  | 1 | 2 | 1 | 2 |
| 9  | 2 | 2 | 1 | 2 |
| 10 | 2 | 2 | 1 | 1 |
| 11 | 1 | 2 | 1 | 2 |
| 12 | 2 | 2 | 1 | 2 |
| 13 | 2 | 2 | 1 | 2 |
| 14 | 2 | 2 | 1 | 2 |
| 15 | 2 | 2 | 2 | 2 |
| 16 | 2 | 2 | 1 | 2 |
| 17 | 2 | 2 | 1 | 2 |
| 18 | 2 | 2 | 1 | 2 |
| 19 | 2 | 2 | 1 | 2 |
| 20 | 1 | 2 | 1 | 1 |
| 21 | 2 | 2 | 1 | 2 |
| 22 | 2 | 2 | 1 | 2 |
| 23 | 2 | 2 | 1 | 2 |
| 24 | 2 | 2 | 1 | 2 |
| 25 | 2 | 2 | 1 | 1 |
| 26 | 2 | 2 | 1 | 2 |
| 27 | 1 | 2 | 1 | 2 |
| 28 | 2 | 2 | 1 | 2 |
| 29 | 2 | 2 | 2 | 1 |
| 30 | 2 | 2 | 2 | 2 |
| 31 | 2 | 2 | 2 | 2 |
| 32 | 1 | 2 | 2 | 2 |
| 33 | 2 | 2 | 1 | 2 |
| 34 | 1 | 2 | 1 | 2 |
| 35 | 2 | 2 | 1 | 2 |
| 36 | 2 | 2 | 2 | 1 |
| 37 | 2 | 2 | 1 | 2 |
| 38 | 1 | 2 | 1 | 2 |
| 39 | 1 | 2 | 1 | 2 |
| 40 | 2 | 2 | 1 | 2 |
| 41 | 2 | 2 | 2 | 1 |
| 42 | 2 | 2 | 1 | 1 |
| 43 | 2 | 2 | 1 | 2 |
| 44 | 2 | 2 | 1 | 2 |
| 45 | 2 | 2 | 1 | 2 |
| 46 | 2 | 2 | 1 | 2 |
| 47 | 2 | 2 | 1 | 2 |
| 48 | 2 | 2 | 2 | 2 |
| 49 | 2 | 2 | 1 | 2 |
| 50 | 1 | 2 | 1 | 2 |
| 51 | 2 | 2 | 1 | 2 |
| 52 | 2 | 2 | 2 | 2 |
| 53 | 2 | 2 | 1 | 2 |
| 54 | 1 | 2 | 1 | 2 |
| 55 | 1 | 2 | 1 | 2 |
| 56 | 2 | 2 | 1 | 2 |
| 57 | 2 | 2 | 2 | 2 |
| 58 | 2 | 2 | 1 | 2 |
| 59 | 1 | 2 | 2 | 2 |
| 60 | 1 | 2 | 1 | 2 |

For peer review only

|    |   |   |   |   |
|----|---|---|---|---|
| 1  |   |   |   |   |
| 2  | 1 | 2 | 1 | 2 |
| 3  | 1 | 2 | 1 | 2 |
| 4  | 2 | 2 | 1 | 2 |
| 5  | 2 | 2 | 2 | 2 |
| 6  | 1 | 2 | 1 | 2 |
| 7  | 2 | 2 | 1 | 2 |
| 8  | 2 | 2 | 1 | 2 |
| 9  | 2 | 2 | 1 | 2 |
| 10 | 2 | 2 | 1 | 2 |
| 11 | 2 | 2 | 1 | 2 |
| 12 | 1 | 2 | 1 | 2 |
| 13 | 2 | 2 | 1 | 2 |
| 14 | 2 | 2 | 1 | 2 |
| 15 | 2 | 2 | 1 | 2 |
| 16 | 1 | 2 | 1 | 1 |
| 17 | 1 | 2 | 1 | 2 |
| 18 | 1 | 2 | 1 | 2 |
| 19 | 1 | 2 | 1 | 2 |
| 20 | 2 | 2 | 2 | 2 |
| 21 | 1 | 2 | 1 | 2 |
| 22 | 1 | 2 | 1 | 1 |
| 23 | 1 | 2 | 1 | 1 |
| 24 | 1 | 2 | 1 | 1 |
| 25 | 2 | 2 | 1 | 2 |
| 26 | 1 | 2 | 1 | 2 |
| 27 | 1 | 2 | 1 | 2 |
| 28 | 2 | 2 | 1 | 2 |
| 29 | 2 | 2 | 1 | 2 |
| 30 | 2 | 2 | 1 | 2 |
| 31 | 1 | 2 | 1 | 2 |
| 32 | 2 | 2 | 1 | 1 |
| 33 | 2 | 2 | 1 | 2 |
| 34 | 1 | 2 | 1 | 2 |
| 35 | 2 | 2 | 2 | 2 |
| 36 | 2 | 2 | 2 | 2 |
| 37 | 2 | 2 | 2 | 2 |
| 38 | 2 | 2 | 2 | 2 |
| 39 | 2 | 2 | 1 | 2 |
| 40 | 1 | 2 | 2 | 2 |
| 41 | 2 | 2 | 2 | 1 |
| 42 | 2 | 2 | 2 | 2 |
| 43 | 2 | 2 | 2 | 2 |
| 44 | 2 | 2 | 1 | 2 |
| 45 | 1 | 2 | 1 | 2 |
| 46 | 2 | 2 | 1 | 2 |
| 47 | 2 | 2 | 1 | 2 |
| 48 | 2 | 2 | 1 | 2 |
| 49 | 2 | 2 | 2 | 2 |
| 50 | 2 | 2 | 1 | 2 |
| 51 | 2 | 2 | 2 | 2 |
| 52 | 2 | 2 | 1 | 2 |
| 53 | 2 | 2 | 1 | 2 |
| 54 | 1 | 2 | 2 | 2 |
| 55 | 2 | 2 | 2 | 2 |
| 56 | 2 | 2 | 2 | 2 |
| 57 | 2 | 2 | 2 | 1 |
| 58 | 2 | 2 | 1 | 2 |
| 59 | 2 | 2 | 2 | 2 |
| 60 | 2 | 2 | 2 | 2 |

|    |   |   |   |   |
|----|---|---|---|---|
| 1  |   |   |   |   |
| 2  | 2 | 2 | 2 | 2 |
| 3  | 2 | 2 | 2 | 2 |
| 4  | 2 | 2 | 1 | 2 |
| 5  | 2 | 2 | 2 | 2 |
| 6  | 2 | 2 | 2 | 2 |
| 7  | 2 | 2 | 2 | 2 |
| 8  | 2 | 2 | 2 | 2 |
| 9  | 2 | 2 | 2 | 2 |
| 10 | 2 | 2 | 2 | 2 |
| 11 | 2 | 2 | 2 | 2 |
| 12 | 2 | 2 | 2 | 2 |
| 13 | 2 | 2 | 2 | 2 |
| 14 | 2 | 2 | 2 | 2 |
| 15 | 2 | 2 | 2 | 2 |
| 16 | 2 | 2 | 1 | 2 |
| 17 | 2 | 2 | 2 | 2 |
| 18 | 2 | 2 | 2 | 2 |
| 19 | 2 | 2 | 2 | 2 |
| 20 | 2 | 2 | 2 | 2 |
| 21 | 2 | 2 | 1 | 2 |
| 22 | 2 | 2 | 2 | 2 |
| 23 | 2 | 2 | 2 | 2 |
| 24 | 2 | 2 | 1 | 2 |
| 25 | 2 | 2 | 1 | 2 |
| 26 | 2 | 2 | 2 | 1 |
| 27 | 2 | 2 | 2 | 2 |
| 28 | 2 | 2 | 1 | 2 |
| 29 | 2 | 2 | 2 | 2 |
| 30 | 2 | 2 | 2 | 2 |
| 31 | 2 | 2 | 2 | 2 |
| 32 | 2 | 2 | 2 | 2 |
| 33 | 2 | 2 | 1 | 2 |
| 34 | 2 | 2 | 2 | 2 |
| 35 | 2 | 2 | 1 | 2 |
| 36 | 2 | 2 | 1 | 2 |
| 37 | 2 | 2 | 2 | 2 |
| 38 | 2 | 2 | 2 | 2 |
| 39 | 2 | 2 | 1 | 2 |
| 40 | 2 | 2 | 1 | 2 |
| 41 | 2 | 2 | 2 | 2 |
| 42 | 2 | 2 | 2 | 2 |
| 43 | 1 | 2 | 2 | 2 |
| 44 | 2 | 2 | 2 | 2 |
| 45 | 2 | 2 | 1 | 2 |
| 46 | 2 | 2 | 2 | 2 |
| 47 | 2 | 2 | 2 | 2 |
| 48 | 2 | 2 | 2 | 2 |
| 49 | 2 | 2 | 2 | 2 |
| 50 | 2 | 2 | 2 | 2 |
| 51 | 2 | 2 | 2 | 2 |
| 52 | 2 | 2 | 2 | 2 |
| 53 | 2 | 2 | 2 | 2 |
| 54 | 2 | 2 | 2 | 2 |
| 55 | 2 | 2 | 2 | 2 |
| 56 | 2 | 2 | 2 | 2 |
| 57 | 2 | 2 | 1 | 2 |
| 58 | 2 | 2 | 1 | 2 |
| 59 | 2 | 2 | 2 | 2 |
| 60 | 2 | 2 | 2 | 2 |
|    | 2 | 2 | 1 | 2 |

For peer review only

|    |   |   |   |   |
|----|---|---|---|---|
| 1  |   |   |   |   |
| 2  | 2 | 2 | 2 | 2 |
| 3  | 2 | 2 | 2 | 2 |
| 4  | 2 | 2 | 2 | 2 |
| 5  | 2 | 2 | 2 | 2 |
| 6  | 2 | 2 | 2 | 2 |
| 7  | 2 | 2 | 2 | 2 |
| 8  | 2 | 2 | 2 | 2 |
| 9  | 2 | 2 | 2 | 2 |
| 10 | 2 | 2 | 2 | 2 |
| 11 | 2 | 2 | 2 | 2 |
| 12 | 2 | 2 | 2 | 2 |
| 13 | 2 | 2 | 2 | 2 |
| 14 | 2 | 2 | 2 | 1 |
| 15 | 2 | 2 | 2 | 2 |
| 16 | 2 | 2 | 2 | 2 |
| 17 | 2 | 2 | 1 | 2 |
| 18 | 2 | 2 | 2 | 2 |
| 19 | 2 | 2 | 2 | 2 |
| 20 | 2 | 2 | 2 | 2 |
| 21 | 2 | 2 | 1 | 2 |
| 22 | 2 | 2 | 1 | 2 |
| 23 | 2 | 2 | 1 | 2 |
| 24 | 2 | 2 | 1 | 2 |
| 25 | 2 | 2 | 2 | 2 |
| 26 | 2 | 2 | 1 | 2 |
| 27 | 2 | 2 | 1 | 2 |
| 28 | 2 | 2 | 1 | 2 |
| 29 | 2 | 2 | 1 | 2 |
| 30 | 2 | 2 | 2 | 2 |
| 31 | 2 | 2 | 2 | 2 |
| 32 | 2 | 2 | 1 | 2 |
| 33 | 2 | 2 | 1 | 2 |
| 34 | 2 | 2 | 1 | 2 |
| 35 | 2 | 2 | 1 | 2 |
| 36 | 2 | 2 | 1 | 2 |
| 37 | 2 | 2 | 1 | 2 |
| 38 | 2 | 2 | 2 | 1 |
| 39 | 2 | 2 | 1 | 2 |
| 40 | 2 | 2 | 1 | 2 |
| 41 | 2 | 2 | 1 | 2 |
| 42 | 2 | 2 | 1 | 2 |
| 43 | 2 | 2 | 1 | 2 |
| 44 | 2 | 2 | 2 | 2 |
| 45 | 2 | 2 | 1 | 2 |
| 46 | 2 | 2 | 1 | 2 |
| 47 | 2 | 2 | 1 | 2 |
| 48 | 1 | 2 | 1 | 2 |
| 49 | 2 | 2 | 2 | 2 |
| 50 | 1 | 2 | 1 | 2 |
| 51 | 2 | 2 | 2 | 2 |
| 52 | 2 | 2 | 1 | 2 |
| 53 | 2 | 2 | 1 | 2 |
| 54 | 2 | 2 | 1 | 2 |
| 55 | 2 | 2 | 1 | 2 |
| 56 | 2 | 2 | 1 | 2 |
| 57 | 2 | 2 | 1 | 2 |
| 58 | 1 | 2 | 1 | 2 |
| 59 | 2 | 2 | 1 | 2 |
| 60 | 2 | 2 | 1 | 2 |

|    |   |   |   |   |
|----|---|---|---|---|
| 1  |   |   |   |   |
| 2  | 2 | 2 | 1 | 2 |
| 3  | 2 | 2 | 2 | 2 |
| 4  | 2 | 2 | 2 | 2 |
| 5  | 2 | 2 | 2 | 2 |
| 6  | 2 | 2 | 2 | 2 |
| 7  | 1 | 2 | 1 | 2 |
| 8  | 2 | 2 | 1 | 2 |
| 9  | 2 | 2 | 2 | 2 |
| 10 | 2 | 2 | 2 | 2 |
| 11 | 2 | 2 | 2 | 2 |
| 12 | 2 | 2 | 2 | 2 |
| 13 | 2 | 2 | 2 | 2 |
| 14 | 2 | 2 | 1 | 2 |
| 15 | 2 | 2 | 1 | 1 |
| 16 | 2 | 2 | 1 | 2 |
| 17 | 2 | 2 | 2 | 2 |
| 18 | 1 | 2 | 1 | 2 |
| 19 | 2 | 2 | 1 | 2 |
| 20 | 2 | 2 | 1 | 2 |
| 21 | 2 | 2 | 2 | 2 |
| 22 | 2 | 2 | 1 | 2 |
| 23 | 2 | 2 | 1 | 2 |
| 24 | 2 | 2 | 1 | 2 |
| 25 | 2 | 2 | 1 | 1 |
| 26 | 2 | 2 | 1 | 2 |
| 27 | 2 | 2 | 1 | 2 |
| 28 | 2 | 2 | 1 | 2 |
| 29 | 2 | 2 | 1 | 2 |
| 30 | 1 | 2 | 1 | 2 |
| 31 | 2 | 2 | 1 | 2 |
| 32 | 2 | 2 | 1 | 2 |
| 33 | 2 | 2 | 1 | 2 |
| 34 | 2 | 2 | 2 | 2 |
| 35 | 2 | 2 | 2 | 2 |
| 36 | 1 | 2 | 2 | 2 |
| 37 | 1 | 2 | 2 | 2 |
| 38 | 2 | 2 | 1 | 2 |
| 39 | 2 | 2 | 2 | 2 |
| 40 | 2 | 2 | 2 | 2 |
| 41 | 2 | 2 | 2 | 2 |
| 42 | 2 | 2 | 2 | 2 |
| 43 | 2 | 2 | 2 | 2 |
| 44 | 2 | 2 | 2 | 1 |
| 45 | 2 | 2 | 1 | 2 |
| 46 | 1 | 2 | 1 | 2 |
| 47 | 2 | 2 | 1 | 2 |
| 48 | 2 | 2 | 1 | 2 |
| 49 | 2 | 2 | 1 | 2 |
| 50 | 2 | 2 | 1 | 2 |
| 51 | 2 | 2 | 2 | 2 |
| 52 | 2 | 2 | 1 | 2 |
| 53 | 2 | 2 | 2 | 2 |
| 54 | 2 | 2 | 2 | 2 |
| 55 | 2 | 2 | 1 | 2 |
| 56 | 2 | 2 | 1 | 2 |
| 57 | 2 | 2 | 1 | 2 |
| 58 | 2 | 2 | 1 | 2 |
| 59 | 2 | 2 | 1 | 2 |
| 60 | 2 | 2 | 1 | 2 |
|    | 2 | 2 | 1 | 2 |

For peer review only

|    |   |   |   |   |
|----|---|---|---|---|
| 1  |   |   |   |   |
| 2  | 2 | 2 | 1 | 1 |
| 3  | 2 | 2 | 1 | 2 |
| 4  | 2 | 2 | 1 | 2 |
| 5  | 1 | 2 | 2 | 2 |
| 6  | 2 | 2 | 1 | 2 |
| 7  | 2 | 2 | 1 | 2 |
| 8  | 2 | 2 | 1 | 2 |
| 9  | 2 | 2 | 1 | 2 |
| 10 | 2 | 2 | 1 | 2 |
| 11 | 2 | 2 | 2 | 2 |
| 12 | 2 | 2 | 1 | 2 |
| 13 | 2 | 2 | 1 | 2 |
| 14 | 2 | 2 | 1 | 2 |
| 15 | 2 | 2 | 2 | 2 |
| 16 | 1 | 2 | 2 | 2 |
| 17 | 1 | 2 | 2 | 2 |
| 18 | 2 | 2 | 1 | 2 |
| 19 | 2 | 2 | 1 | 2 |
| 20 | 2 | 2 | 1 | 2 |
| 21 | 2 | 2 | 2 | 2 |
| 22 | 2 | 2 | 1 | 2 |
| 23 | 2 | 2 | 1 | 2 |
| 24 | 2 | 2 | 1 | 2 |
| 25 | 2 | 2 | 1 | 2 |
| 26 | 2 | 2 | 1 | 2 |
| 27 | 2 | 2 | 1 | 2 |
| 28 | 2 | 2 | 1 | 2 |
| 29 | 2 | 2 | 1 | 2 |
| 30 | 2 | 2 | 1 | 2 |
| 31 | 1 | 2 | 1 | 2 |
| 32 | 2 | 2 | 1 | 2 |
| 33 | 2 | 2 | 1 | 1 |
| 34 | 2 | 2 | 1 | 2 |
| 35 | 2 | 2 | 2 | 2 |
| 36 | 2 | 2 | 2 | 2 |
| 37 | 2 | 2 | 2 | 2 |
| 38 | 2 | 2 | 2 | 2 |
| 39 | 2 | 2 | 1 | 2 |
| 40 | 1 | 2 | 1 | 2 |
| 41 | 1 | 2 | 2 | 2 |
| 42 | 2 | 2 | 2 | 1 |
| 43 | 1 | 2 | 2 | 2 |
| 44 | 2 | 2 | 2 | 2 |
| 45 | 2 | 2 | 1 | 2 |
| 46 | 2 | 2 | 2 | 2 |
| 47 | 2 | 2 | 1 | 2 |
| 48 | 2 | 2 | 2 | 2 |
| 49 | 2 | 2 | 1 | 2 |
| 50 | 2 | 2 | 1 | 2 |
| 51 | 2 | 2 | 2 | 2 |
| 52 | 1 | 2 | 1 | 2 |
| 53 | 2 | 2 | 2 | 2 |
| 54 | 2 | 2 | 1 | 2 |
| 55 | 1 | 2 | 1 | 2 |
| 56 | 2 | 2 | 1 | 2 |
| 57 | 2 | 2 | 1 | 2 |
| 58 | 2 | 2 | 1 | 2 |
| 59 | 2 | 2 | 1 | 2 |
| 60 | 2 | 2 | 1 | 2 |

|    |   |   |   |   |
|----|---|---|---|---|
| 1  |   |   |   |   |
| 2  | 2 | 2 | 1 | 2 |
| 3  | 2 | 2 | 2 | 2 |
| 4  | 2 | 2 | 1 | 2 |
| 5  | 2 | 2 | 1 | 2 |
| 6  | 2 | 2 | 1 | 2 |
| 7  | 2 | 2 | 1 | 2 |
| 8  | 2 | 2 | 2 | 2 |
| 9  | 2 | 2 | 1 | 2 |
| 10 | 2 | 2 | 1 | 2 |
| 11 | 2 | 2 | 1 | 2 |
| 12 | 2 | 2 | 1 | 2 |
| 13 | 2 | 2 | 1 | 2 |
| 14 | 2 | 2 | 1 | 2 |
| 15 | 1 | 2 | 2 | 2 |
| 16 | 2 | 2 | 1 | 2 |
| 17 | 2 | 2 | 1 | 2 |
| 18 | 2 | 2 | 2 | 2 |
| 19 | 2 | 2 | 2 | 2 |
| 20 | 2 | 2 | 1 | 1 |
| 21 | 2 | 2 | 1 | 2 |
| 22 | 1 | 2 | 1 | 2 |
| 23 | 2 | 2 | 1 | 2 |
| 24 | 2 | 2 | 2 | 2 |
| 25 | 2 | 2 | 2 | 2 |
| 26 | 2 | 2 | 2 | 2 |
| 27 | 2 | 2 | 1 | 2 |
| 28 | 1 | 2 | 1 | 2 |
| 29 | 2 | 2 | 1 | 2 |
| 30 | 2 | 2 | 1 | 2 |
| 31 | 2 | 2 | 1 | 2 |
| 32 | 2 | 2 | 1 | 2 |
| 33 | 2 | 2 | 1 | 2 |
| 34 | 2 | 2 | 1 | 2 |
| 35 | 2 | 2 | 1 | 2 |
| 36 | 2 | 2 | 1 | 2 |
| 37 | 1 | 2 | 1 | 2 |
| 38 | 2 | 2 | 1 | 2 |
| 39 | 2 | 2 | 1 | 1 |
| 40 | 1 | 1 | 2 | 2 |
| 41 | 2 | 2 | 1 | 2 |
| 42 | 2 | 2 | 1 | 2 |
| 43 | 2 | 2 | 1 | 2 |
| 44 | 2 | 2 | 1 | 2 |
| 45 | 1 | 2 | 1 | 2 |
| 46 | 2 | 2 | 2 | 2 |
| 47 | 2 | 2 | 2 | 2 |
| 48 | 2 | 2 | 2 | 2 |
| 49 | 2 | 2 | 1 | 2 |
| 50 | 2 | 2 | 2 | 2 |
| 51 | 1 | 2 | 1 | 2 |
| 52 | 2 | 2 | 1 | 2 |
| 53 | 2 | 2 | 1 | 2 |
| 54 | 2 | 2 | 1 | 2 |
| 55 | 2 | 2 | 1 | 2 |
| 56 | 2 | 2 | 2 | 2 |
| 57 | 2 | 2 | 2 | 2 |
| 58 | 2 | 2 | 1 | 2 |
| 59 | 2 | 2 | 2 | 2 |
| 60 | 2 | 2 | 1 | 2 |

For peer review only

|    |   |   |   |   |
|----|---|---|---|---|
| 1  |   |   |   |   |
| 2  | 1 | 2 | 1 | 2 |
| 3  | 2 | 2 | 1 | 2 |
| 4  | 2 | 2 | 1 | 1 |
| 5  | 1 | 2 | 1 | 2 |
| 6  | 2 | 2 | 1 | 2 |
| 7  | 2 | 2 | 1 | 2 |
| 8  | 2 | 2 | 1 | 2 |
| 9  | 2 | 2 | 2 | 2 |
| 10 | 2 | 2 | 2 | 2 |
| 11 | 2 | 2 | 1 | 2 |
| 12 | 2 | 2 | 1 | 2 |
| 13 | 2 | 2 | 1 | 2 |
| 14 | 1 | 2 | 1 | 2 |
| 15 | 2 | 2 | 1 | 2 |
| 16 | 2 | 2 | 2 | 2 |
| 17 | 2 | 2 | 2 | 2 |
| 18 | 2 | 2 | 2 | 2 |
| 19 | 1 | 2 | 1 | 2 |
| 20 | 1 | 2 | 1 | 2 |
| 21 | 2 | 2 | 1 | 2 |
| 22 | 2 | 2 | 1 | 2 |
| 23 | 2 | 2 | 2 | 2 |
| 24 | 2 | 2 | 2 | 2 |
| 25 | 2 | 2 | 1 | 2 |
| 26 | 2 | 2 | 1 | 2 |
| 27 | 2 | 2 | 1 | 2 |
| 28 | 2 | 2 | 2 | 2 |
| 29 | 2 | 2 | 2 | 2 |
| 30 | 1 | 2 | 1 | 2 |
| 31 | 1 | 2 | 1 | 2 |
| 32 | 1 | 2 | 1 | 2 |
| 33 | 1 | 2 | 2 | 2 |
| 34 | 2 | 2 | 1 | 2 |
| 35 | 2 | 2 | 1 | 2 |
| 36 | 2 | 2 | 1 | 2 |
| 37 | 2 | 2 | 1 | 2 |
| 38 | 2 | 2 | 1 | 2 |
| 39 | 2 | 2 | 2 | 2 |
| 40 | 2 | 2 | 2 | 2 |
| 41 | 2 | 2 | 2 | 2 |
| 42 | 1 | 2 | 1 | 2 |
| 43 | 2 | 2 | 1 | 2 |
| 44 | 2 | 2 | 1 | 2 |
| 45 | 2 | 2 | 1 | 2 |
| 46 | 2 | 2 | 2 | 2 |
| 47 | 2 | 2 | 2 | 2 |
| 48 | 2 | 2 | 1 | 2 |
| 49 | 1 | 2 | 1 | 2 |
| 50 | 2 | 2 | 1 | 2 |
| 51 | 2 | 2 | 2 | 2 |
| 52 | 2 | 2 | 1 | 2 |
| 53 | 2 | 2 | 1 | 2 |
| 54 | 1 | 2 | 1 | 2 |
| 55 | 2 | 2 | 2 | 2 |
| 56 | 1 | 2 | 1 | 2 |
| 57 | 2 | 2 | 1 | 2 |
| 58 | 2 | 2 | 2 | 2 |
| 59 | 2 | 2 | 2 | 2 |
| 60 | 2 | 2 | 1 | 2 |
|    | 2 | 2 | 1 | 2 |



|    |   |   |   |   |
|----|---|---|---|---|
| 1  |   |   |   |   |
| 2  | 2 | 2 | 1 | 2 |
| 3  | 1 | 2 | 2 | 2 |
| 4  | 2 | 2 | 1 | 2 |
| 5  | 2 | 2 | 1 | 2 |
| 6  | 2 | 2 | 2 | 2 |
| 7  | 2 | 2 | 2 | 2 |
| 8  | 2 | 2 | 1 | 2 |
| 9  | 2 | 2 | 1 | 2 |
| 10 | 2 | 2 | 2 | 1 |
| 11 | 1 | 2 | 2 | 2 |
| 12 | 2 | 2 | 2 | 2 |
| 13 | 2 | 2 | 2 | 2 |
| 14 | 2 | 2 | 1 | 1 |
| 15 | 2 | 2 | 2 | 2 |
| 16 | 1 | 2 | 1 | 2 |
| 17 | 1 | 2 | 1 | 2 |
| 18 | 2 | 2 | 1 | 2 |
| 19 | 2 | 2 | 1 | 2 |
| 20 | 2 | 2 | 1 | 2 |
| 21 | 2 | 2 | 1 | 2 |
| 22 | 2 | 2 | 2 | 1 |
| 23 | 2 | 2 | 1 | 2 |
| 24 | 2 | 2 | 2 | 2 |
| 25 | 2 | 2 | 2 | 2 |
| 26 | 2 | 2 | 1 | 1 |
| 27 | 2 | 2 | 2 | 2 |
| 28 | 2 | 2 | 1 | 2 |
| 29 | 1 | 2 | 1 | 2 |
| 30 | 2 | 2 | 2 | 2 |
| 31 | 2 | 2 | 2 | 2 |
| 32 | 1 | 2 | 1 | 2 |
| 33 | 2 | 2 | 1 | 2 |
| 34 | 2 | 2 | 1 | 2 |
| 35 | 2 | 2 | 2 | 2 |
| 36 | 2 | 2 | 2 | 2 |
| 37 | 2 | 2 | 2 | 2 |
| 38 | 2 | 2 | 1 | 2 |
| 39 | 2 | 2 | 2 | 2 |
| 40 | 2 | 2 | 1 | 2 |
| 41 | 2 | 2 | 1 | 2 |
| 42 | 2 | 2 | 2 | 2 |
| 43 | 2 | 2 | 1 | 2 |
| 44 | 2 | 2 | 2 | 2 |
| 45 | 2 | 2 | 1 | 2 |
| 46 | 2 | 2 | 2 | 2 |
| 47 | 2 | 2 | 1 | 2 |
| 48 | 2 | 2 | 1 | 2 |
| 49 | 2 | 2 | 1 | 2 |
| 50 | 2 | 2 | 1 | 1 |
| 51 | 2 | 2 | 1 | 2 |
| 52 | 2 | 2 | 1 | 2 |
| 53 | 2 | 2 | 1 | 2 |
| 54 | 2 | 2 | 1 | 2 |
| 55 | 2 | 2 | 2 | 2 |
| 56 | 2 | 2 | 2 | 2 |
| 57 | 2 | 2 | 1 | 2 |
| 58 | 1 | 2 | 1 | 2 |
| 59 | 2 | 2 | 1 | 2 |
| 60 | 2 | 2 | 1 | 2 |

For peer review only

|    |   |   |   |   |
|----|---|---|---|---|
| 1  |   |   |   |   |
| 2  | 1 | 2 | 2 | 2 |
| 3  | 2 | 2 | 1 | 2 |
| 4  | 2 | 2 | 1 | 2 |
| 5  | 2 | 2 | 2 | 2 |
| 6  | 2 | 2 | 1 | 2 |
| 7  | 2 | 2 | 1 | 2 |
| 8  | 2 | 2 | 1 | 2 |
| 9  | 2 | 2 | 1 | 2 |
| 10 | 2 | 2 | 1 | 2 |
| 11 | 2 | 2 | 2 | 2 |
| 12 | 2 | 2 | 1 | 2 |
| 13 | 2 | 2 | 2 | 2 |
| 14 | 2 | 2 | 1 | 2 |
| 15 | 1 | 2 | 2 | 2 |
| 16 | 2 | 2 | 1 | 2 |
| 17 | 2 | 2 | 1 | 2 |
| 18 | 2 | 2 | 1 | 2 |
| 19 | 1 | 2 | 1 | 2 |
| 20 | 2 | 2 | 1 | 2 |
| 21 | 2 | 2 | 2 | 2 |
| 22 | 2 | 2 | 1 | 2 |
| 23 | 2 | 2 | 1 | 2 |
| 24 | 2 | 2 | 1 | 2 |
| 25 | 2 | 2 | 2 | 1 |
| 26 | 2 | 2 | 1 | 2 |
| 27 | 2 | 2 | 1 | 2 |
| 28 | 2 | 2 | 2 | 2 |
| 29 | 2 | 1 | 1 | 2 |
| 30 | 2 | 2 | 1 | 1 |
| 31 | 2 | 2 | 1 | 2 |
| 32 | 2 | 2 | 1 | 2 |
| 33 | 2 | 2 | 1 | 2 |
| 34 | 2 | 2 | 1 | 1 |
| 35 | 2 | 2 | 1 | 2 |
| 36 | 2 | 2 | 1 | 2 |
| 37 | 2 | 2 | 1 | 2 |
| 38 | 2 | 2 | 1 | 2 |
| 39 | 2 | 2 | 1 | 2 |
| 40 | 2 | 2 | 1 | 2 |
| 41 | 2 | 2 | 1 | 2 |
| 42 | 2 | 2 | 2 | 2 |
| 43 | 2 | 2 | 1 | 2 |
| 44 | 1 | 2 | 2 | 1 |
| 45 | 2 | 2 | 1 | 2 |
| 46 | 1 | 2 | 1 | 2 |
| 47 | 2 | 2 | 1 | 2 |
| 48 | 1 | 2 | 1 | 2 |
| 49 | 2 | 2 | 1 | 2 |
| 50 | 1 | 2 | 1 | 2 |
| 51 | 1 | 2 | 1 | 2 |
| 52 | 1 | 2 | 1 | 2 |
| 53 | 2 | 2 | 2 | 2 |
| 54 | 2 | 2 | 1 | 1 |
| 55 | 2 | 2 | 1 | 2 |
| 56 | 1 | 2 | 1 | 2 |
| 57 | 2 | 2 | 2 | 2 |
| 58 | 1 | 2 | 1 | 2 |
| 59 | 2 | 2 | 1 | 2 |
| 60 | 1 | 2 | 1 | 2 |
|    | 2 | 2 | 1 | 2 |

|    |   |   |   |   |
|----|---|---|---|---|
| 1  |   |   |   |   |
| 2  | 2 | 2 | 1 | 1 |
| 3  | 1 | 2 | 1 | 2 |
| 4  | 2 | 2 | 1 | 2 |
| 5  | 2 | 2 | 1 | 2 |
| 6  | 1 | 2 | 1 | 2 |
| 7  | 2 | 2 | 2 | 2 |
| 8  | 2 | 2 | 2 | 2 |
| 9  | 2 | 2 | 2 | 2 |
| 10 | 2 | 2 | 1 | 2 |
| 11 | 2 | 2 | 1 | 2 |
| 12 | 2 | 2 | 1 | 2 |
| 13 | 2 | 2 | 1 | 2 |
| 14 | 2 | 2 | 1 | 2 |
| 15 | 2 | 2 | 1 | 2 |
| 16 | 2 | 2 | 1 | 2 |
| 17 | 1 | 2 | 1 | 2 |
| 18 | 1 | 2 | 1 | 2 |
| 19 | 1 | 2 | 1 | 2 |
| 20 | 1 | 2 | 1 | 2 |
| 21 | 2 | 2 | 2 | 2 |
| 22 | 1 | 2 | 1 | 2 |
| 23 | 2 | 2 | 1 | 2 |
| 24 | 1 | 2 | 1 | 2 |
| 25 | 2 | 2 | 1 | 2 |
| 26 | 2 | 2 | 1 | 2 |
| 27 | 2 | 2 | 1 | 2 |
| 28 | 2 | 2 | 1 | 2 |
| 29 | 2 | 2 | 2 | 2 |
| 30 | 2 | 2 | 2 | 2 |
| 31 | 2 | 2 | 2 | 2 |
| 32 | 2 | 2 | 1 | 2 |
| 33 | 2 | 2 | 2 | 2 |
| 34 | 1 | 2 | 2 | 2 |
| 35 | 2 | 2 | 1 | 2 |
| 36 | 2 | 2 | 1 | 2 |
| 37 | 2 | 2 | 1 | 2 |
| 38 | 2 | 2 | 1 | 2 |
| 39 | 2 | 2 | 1 | 2 |
| 40 | 2 | 2 | 2 | 2 |
| 41 | 2 | 2 | 1 | 2 |
| 42 | 2 | 2 | 1 | 2 |
| 43 | 2 | 2 | 1 | 2 |
| 44 | 2 | 2 | 1 | 2 |
| 45 | 1 | 2 | 1 | 2 |
| 46 | 2 | 2 | 1 | 2 |
| 47 | 1 | 2 | 1 | 2 |
| 48 | 2 | 2 | 2 | 2 |
| 49 | 2 | 2 | 1 | 1 |
| 50 | 2 | 2 | 1 | 2 |
| 51 | 2 | 2 | 1 | 1 |
| 52 | 2 | 2 | 1 | 2 |
| 53 | 2 | 2 | 1 | 1 |
| 54 | 2 | 2 | 1 | 2 |
| 55 | 2 | 2 | 1 | 1 |
| 56 | 1 | 2 | 1 | 2 |
| 57 | 2 | 2 | 1 | 2 |
| 58 | 2 | 2 | 1 | 2 |
| 59 | 2 | 2 | 1 | 2 |
| 60 | 2 | 2 | 1 | 2 |

For peer review only

|    |   |   |   |   |
|----|---|---|---|---|
| 1  |   |   |   |   |
| 2  | 2 | 2 | 1 | 1 |
| 3  | 2 | 2 | 2 | 1 |
| 4  | 2 | 2 | 1 | 2 |
| 5  | 2 | 2 | 1 | 2 |
| 6  | 2 | 2 | 2 | 2 |
| 7  | 2 | 2 | 2 | 2 |
| 8  | 2 | 2 | 2 | 2 |
| 9  | 1 | 2 | 1 | 2 |
| 10 | 2 | 2 | 1 | 2 |
| 11 | 1 | 2 | 2 | 2 |
| 12 | 2 | 2 | 1 | 1 |
| 13 | 2 | 2 | 1 | 2 |
| 14 | 2 | 2 | 1 | 2 |
| 15 | 2 | 2 | 1 | 2 |
| 16 | 2 | 2 | 1 | 2 |
| 17 | 2 | 2 | 2 | 2 |
| 18 | 2 | 2 | 1 | 2 |
| 19 | 2 | 2 | 1 | 2 |
| 20 | 1 | 2 | 1 | 2 |
| 21 | 1 | 2 | 1 | 2 |
| 22 | 2 | 2 | 1 | 1 |
| 23 | 2 | 2 | 2 | 2 |
| 24 | 2 | 2 | 1 | 1 |
| 25 | 2 | 2 | 1 | 2 |
| 26 | 2 | 2 | 1 | 2 |
| 27 | 2 | 2 | 1 | 2 |
| 28 | 1 | 2 | 1 | 2 |
| 29 | 2 | 2 | 1 | 2 |
| 30 | 2 | 2 | 1 | 2 |
| 31 | 2 | 2 | 1 | 2 |
| 32 | 1 | 2 | 1 | 2 |
| 33 | 2 | 2 | 1 | 2 |
| 34 | 2 | 2 | 2 | 2 |
| 35 | 2 | 2 | 1 | 2 |
| 36 | 2 | 2 | 1 | 2 |
| 37 | 2 | 2 | 1 | 2 |
| 38 | 2 | 2 | 1 | 2 |
| 39 | 2 | 2 | 1 | 2 |
| 40 | 2 | 2 | 1 | 2 |
| 41 | 2 | 2 | 1 | 2 |
| 42 | 2 | 2 | 1 | 2 |
| 43 | 2 | 2 | 1 | 1 |
| 44 | 2 | 2 | 2 | 2 |
| 45 | 2 | 2 | 1 | 2 |
| 46 | 2 | 2 | 1 | 2 |
| 47 | 2 | 2 | 1 | 2 |
| 48 | 2 | 2 | 1 | 2 |
| 49 | 2 | 2 | 2 | 2 |
| 50 | 2 | 2 | 1 | 1 |
| 51 | 2 | 2 | 1 | 2 |
| 52 | 2 | 2 | 1 | 2 |
| 53 | 2 | 2 | 1 | 2 |
| 54 | 2 | 2 | 1 | 2 |
| 55 | 2 | 2 | 1 | 2 |
| 56 | 2 | 2 | 1 | 2 |
| 57 | 2 | 2 | 2 | 2 |
| 58 | 2 | 2 | 1 | 2 |
| 59 | 2 | 2 | 2 | 2 |
| 60 | 2 | 2 | 1 | 1 |

|    |   |   |   |   |
|----|---|---|---|---|
| 1  |   |   |   |   |
| 2  | 2 | 2 | 2 | 2 |
| 3  | 2 | 2 | 1 | 2 |
| 4  | 2 | 2 | 1 | 2 |
| 5  | 2 | 2 | 1 | 2 |
| 6  | 2 | 2 | 1 | 2 |
| 7  | 2 | 2 | 1 | 2 |
| 8  | 2 | 2 | 1 | 2 |
| 9  | 2 | 2 | 1 | 2 |
| 10 | 1 | 2 | 2 | 2 |
| 11 | 2 | 2 | 1 | 2 |
| 12 | 2 | 2 | 1 | 2 |
| 13 | 2 | 2 | 1 | 2 |
| 14 | 2 | 2 | 1 | 2 |
| 15 | 2 | 2 | 1 | 2 |
| 16 | 2 | 2 | 1 | 2 |
| 17 | 1 | 2 | 2 | 2 |
| 18 | 2 | 2 | 2 | 2 |
| 19 | 2 | 2 | 2 | 2 |
| 20 | 2 | 2 | 1 | 2 |
| 21 | 2 | 2 | 1 | 2 |
| 22 | 2 | 2 | 1 | 2 |
| 23 | 2 | 2 | 2 | 1 |
| 24 | 2 | 2 | 1 | 2 |
| 25 | 2 | 2 | 1 | 2 |
| 26 | 1 | 2 | 1 | 2 |
| 27 | 1 | 2 | 1 | 2 |
| 28 | 2 | 2 | 1 | 2 |
| 29 | 2 | 2 | 2 | 2 |
| 30 | 2 | 2 | 1 | 1 |
| 31 | 2 | 2 | 2 | 2 |
| 32 | 2 | 2 | 1 | 2 |
| 33 | 2 | 2 | 1 | 2 |
| 34 | 2 | 2 | 1 | 1 |
| 35 | 2 | 2 | 1 | 2 |
| 36 | 2 | 2 | 1 | 2 |
| 37 | 2 | 2 | 1 | 2 |
| 38 | 2 | 2 | 1 | 2 |
| 39 | 2 | 2 | 1 | 2 |
| 40 | 2 | 2 | 2 | 2 |
| 41 | 2 | 2 | 1 | 2 |
| 42 | 2 | 2 | 2 | 2 |
| 43 | 2 | 2 | 2 | 2 |
| 44 | 2 | 2 | 2 | 2 |
| 45 | 2 | 2 | 1 | 2 |
| 46 | 1 | 2 | 1 | 2 |
| 47 | 1 | 2 | 1 | 2 |
| 48 | 2 | 2 | 1 | 2 |
| 49 | 2 | 2 | 1 | 2 |
| 50 | 2 | 2 | 2 | 2 |
| 51 | 2 | 2 | 1 | 2 |
| 52 | 2 | 2 | 2 | 2 |
| 53 | 2 | 2 | 2 | 2 |
| 54 | 2 | 2 | 2 | 2 |
| 55 | 2 | 2 | 1 | 2 |
| 56 | 2 | 2 | 1 | 2 |
| 57 | 1 | 2 | 1 | 2 |
| 58 | 2 | 2 | 2 | 1 |
| 59 | 2 | 2 | 2 | 2 |
| 60 | 1 | 2 | 2 | 2 |

For peer review only

|    |   |   |   |   |
|----|---|---|---|---|
| 1  |   |   |   |   |
| 2  | 2 | 2 | 1 | 2 |
| 3  | 2 | 2 | 1 | 2 |
| 4  | 2 | 2 | 1 | 2 |
| 5  | 2 | 2 | 1 | 2 |
| 6  | 2 | 2 | 1 | 2 |
| 7  | 2 | 2 | 1 | 2 |
| 8  | 2 | 2 | 1 | 2 |
| 9  | 2 | 2 | 1 | 2 |
| 10 | 2 | 2 | 1 | 2 |
| 11 | 2 | 2 | 1 | 2 |
| 12 | 2 | 2 | 1 | 2 |
| 13 | 1 | 2 | 1 | 2 |
| 14 | 2 | 2 | 1 | 2 |
| 15 | 1 | 2 | 1 | 2 |
| 16 | 2 | 2 | 1 | 2 |
| 17 | 2 | 2 | 1 | 2 |
| 18 | 2 | 2 | 1 | 2 |
| 19 | 2 | 2 | 1 | 2 |
| 20 | 2 | 2 | 1 | 2 |
| 21 | 2 | 2 | 2 | 2 |
| 22 | 2 | 2 | 2 | 2 |
| 23 | 2 | 2 | 2 | 2 |
| 24 | 1 | 2 | 1 | 2 |
| 25 | 2 | 2 | 1 | 2 |
| 26 | 1 | 2 | 1 | 2 |
| 27 | 2 | 2 | 1 | 2 |
| 28 | 2 | 2 | 1 | 2 |
| 29 | 2 | 2 | 1 | 2 |
| 30 | 1 | 2 | 1 | 2 |
| 31 | 2 | 2 | 2 | 2 |
| 32 | 2 | 2 | 2 | 2 |
| 33 | 2 | 2 | 2 | 2 |
| 34 | 2 | 2 | 1 | 2 |
| 35 | 2 | 2 | 1 | 2 |
| 36 | 1 | 2 | 1 | 2 |
| 37 | 1 | 2 | 1 | 2 |
| 38 | 2 | 2 | 2 | 2 |
| 39 | 1 | 2 | 1 | 2 |
| 40 | 2 | 2 | 2 | 2 |
| 41 | 2 | 2 | 1 | 2 |
| 42 | 2 | 2 | 1 | 2 |
| 43 | 1 | 2 | 2 | 2 |
| 44 | 2 | 2 | 1 | 2 |
| 45 | 2 | 2 | 1 | 2 |
| 46 | 2 | 2 | 1 | 2 |
| 47 | 2 | 2 | 1 | 2 |
| 48 | 2 | 2 | 1 | 2 |
| 49 | 1 | 2 | 2 | 2 |
| 50 | 2 | 2 | 1 | 2 |
| 51 | 1 | 2 | 1 | 2 |
| 52 | 2 | 2 | 2 | 2 |
| 53 | 2 | 2 | 2 | 2 |
| 54 | 1 | 2 | 1 | 2 |
| 55 | 2 | 2 | 1 | 2 |
| 56 | 1 | 2 | 1 | 2 |
| 57 | 1 | 2 | 1 | 2 |
| 58 | 2 | 2 | 2 | 2 |
| 59 | 2 | 2 | 2 | 2 |
| 60 | 1 | 2 | 1 | 2 |
|    | 2 | 2 | 1 | 2 |

|    |   |   |   |   |
|----|---|---|---|---|
| 1  |   |   |   |   |
| 2  | 2 | 2 | 2 | 2 |
| 3  | 2 | 2 | 1 | 2 |
| 4  | 2 | 2 | 2 | 2 |
| 5  | 2 | 2 | 1 | 2 |
| 6  | 2 | 2 | 1 | 2 |
| 7  | 2 | 2 | 1 | 2 |
| 8  | 2 | 2 | 1 | 2 |
| 9  | 1 | 2 | 2 | 2 |
| 10 | 2 | 2 | 1 | 2 |
| 11 | 2 | 2 | 1 | 2 |
| 12 | 1 | 2 | 1 | 2 |
| 13 | 2 | 2 | 1 | 1 |
| 14 | 2 | 2 | 1 | 2 |
| 15 | 2 | 2 | 1 | 2 |
| 16 | 2 | 1 | 1 | 2 |
| 17 | 2 | 2 | 1 | 2 |
| 18 | 2 | 2 | 1 | 2 |
| 19 | 2 | 2 | 1 | 2 |
| 20 | 2 | 2 | 1 | 1 |
| 21 | 1 | 2 | 2 | 2 |
| 22 | 2 | 2 | 1 | 2 |
| 23 | 2 | 2 | 1 | 2 |
| 24 | 2 | 2 | 1 | 2 |
| 25 | 2 | 2 | 1 | 2 |
| 26 | 2 | 2 | 2 | 2 |
| 27 | 2 | 2 | 2 | 2 |
| 28 | 2 | 2 | 2 | 2 |
| 29 | 1 | 2 | 1 | 1 |
| 30 | 2 | 2 | 2 | 2 |
| 31 | 2 | 2 | 1 | 2 |
| 32 | 1 | 2 | 2 | 2 |
| 33 | 2 | 2 | 1 | 2 |
| 34 | 2 | 2 | 2 | 2 |
| 35 | 2 | 2 | 2 | 2 |
| 36 | 2 | 2 | 2 | 2 |
| 37 | 2 | 2 | 2 | 2 |
| 38 | 2 | 2 | 2 | 2 |
| 39 | 2 | 2 | 1 | 2 |
| 40 | 2 | 2 | 2 | 2 |
| 41 | 1 | 2 | 2 | 2 |
| 42 | 1 | 2 | 2 | 2 |
| 43 | 1 | 2 | 2 | 2 |
| 44 | 1 | 2 | 2 | 2 |
| 45 | 1 | 2 | 1 | 2 |
| 46 | 2 | 2 | 2 | 2 |
| 47 | 2 | 2 | 2 | 2 |
| 48 | 2 | 2 | 2 | 2 |
| 49 | 1 | 2 | 2 | 2 |
| 50 | 2 | 2 | 1 | 2 |
| 51 | 2 | 2 | 2 | 2 |
| 52 | 1 | 2 | 2 | 2 |
| 53 | 1 | 2 | 1 | 2 |
| 54 | 1 | 2 | 1 | 2 |
| 55 | 2 | 2 | 2 | 2 |
| 56 | 2 | 2 | 2 | 2 |
| 57 | 2 | 2 | 1 | 2 |
| 58 | 2 | 2 | 1 | 2 |
| 59 | 1 | 2 | 1 | 2 |
| 60 | 1 | 2 | 1 | 2 |

For peer review only

|    |   |   |   |   |
|----|---|---|---|---|
| 1  |   |   |   |   |
| 2  | 2 | 2 | 1 | 2 |
| 3  | 1 | 2 | 1 | 2 |
| 4  | 2 | 2 | 1 | 2 |
| 5  | 2 | 2 | 1 | 2 |
| 6  | 2 | 2 | 1 | 2 |
| 7  | 2 | 2 | 1 | 2 |
| 8  | 1 | 2 | 2 | 2 |
| 9  | 2 | 2 | 1 | 2 |
| 10 | 2 | 2 | 2 | 2 |
| 11 | 2 | 2 | 1 | 2 |
| 12 | 2 | 2 | 1 | 1 |
| 13 | 2 | 2 | 1 | 2 |
| 14 | 2 | 2 | 1 | 2 |
| 15 | 2 | 2 | 1 | 2 |
| 16 | 2 | 2 | 1 | 2 |
| 17 | 2 | 2 | 1 | 2 |
| 18 | 2 | 2 | 1 | 2 |
| 19 | 1 | 2 | 1 | 2 |
| 20 | 2 | 2 | 1 | 2 |
| 21 | 2 | 2 | 1 | 2 |
| 22 | 2 | 2 | 1 | 2 |
| 23 | 2 | 2 | 1 | 2 |
| 24 | 1 | 2 | 1 | 1 |
| 25 | 2 | 2 | 1 | 2 |
| 26 | 1 | 2 | 1 | 2 |
| 27 | 1 | 2 | 2 | 2 |
| 28 | 2 | 2 | 1 | 2 |
| 29 | 2 | 2 | 1 | 2 |
| 30 | 2 | 2 | 1 | 2 |
| 31 | 2 | 2 | 1 | 2 |
| 32 | 1 | 2 | 1 | 2 |
| 33 | 1 | 2 | 2 | 2 |
| 34 | 2 | 2 | 1 | 2 |
| 35 | 1 | 2 | 1 | 2 |
| 36 | 1 | 2 | 1 | 2 |
| 37 | 2 | 2 | 1 | 2 |
| 38 | 2 | 2 | 1 | 2 |
| 39 | 2 | 2 | 1 | 1 |
| 40 | 2 | 2 | 2 | 2 |
| 41 | 1 | 2 | 1 | 2 |
| 42 | 1 | 2 | 1 | 2 |
| 43 | 1 | 2 | 1 | 2 |
| 44 | 2 | 2 | 1 | 2 |
| 45 | 2 | 2 | 1 | 2 |
| 46 | 2 | 2 | 2 | 2 |
| 47 | 2 | 2 | 1 | 2 |
| 48 | 2 | 2 | 1 | 2 |
| 49 | 1 | 2 | 1 | 2 |
| 50 | 2 | 2 | 1 | 2 |
| 51 | 2 | 2 | 1 | 2 |
| 52 | 1 | 2 | 1 | 2 |
| 53 | 1 | 2 | 1 | 2 |
| 54 | 2 | 2 | 1 | 2 |
| 55 | 2 | 2 | 1 | 2 |
| 56 | 1 | 2 | 1 | 2 |
| 57 | 2 | 2 | 1 | 2 |
| 58 | 2 | 2 | 1 | 2 |
| 59 | 2 | 2 | 1 | 2 |
| 60 | 2 | 2 | 1 | 2 |
|    | 2 | 2 | 1 | 2 |



|    |   |   |   |   |
|----|---|---|---|---|
| 1  |   |   |   |   |
| 2  | 1 | 2 | 1 | 2 |
| 3  | 1 | 2 | 1 | 2 |
| 4  | 2 | 2 | 1 | 2 |
| 5  | 1 | 2 | 1 | 2 |
| 6  | 1 | 2 | 1 | 2 |
| 7  | 1 | 2 | 1 | 2 |
| 8  | 1 | 2 | 1 | 2 |
| 9  | 2 | 2 | 1 | 2 |
| 10 | 2 | 2 | 1 | 2 |
| 11 | 2 | 2 | 1 | 2 |
| 12 | 2 | 2 | 1 | 2 |
| 13 | 2 | 2 | 1 | 1 |
| 14 | 1 | 2 | 1 | 2 |
| 15 | 2 | 2 | 1 | 2 |
| 16 | 1 | 2 | 1 | 2 |
| 17 | 2 | 2 | 1 | 2 |
| 18 | 2 | 2 | 1 | 2 |
| 19 | 2 | 2 | 1 | 2 |
| 20 | 2 | 2 | 1 | 2 |
| 21 | 2 | 2 | 2 | 2 |
| 22 | 2 | 2 | 1 | 2 |
| 23 | 1 | 2 | 1 | 2 |
| 24 | 2 | 2 | 1 | 2 |
| 25 | 2 | 2 | 1 | 2 |
| 26 | 1 | 2 | 1 | 2 |
| 27 | 2 | 2 | 1 | 2 |
| 28 | 1 | 2 | 1 | 2 |
| 29 | 2 | 2 | 1 | 2 |
| 30 | 1 | 2 | 1 | 2 |
| 31 | 2 | 2 | 2 | 2 |
| 32 | 1 | 2 | 1 | 2 |
| 33 | 2 | 2 | 2 | 2 |
| 34 | 2 | 2 | 2 | 2 |
| 35 | 2 | 2 | 1 | 2 |
| 36 | 2 | 2 | 1 | 2 |
| 37 | 2 | 2 | 1 | 2 |
| 38 | 2 | 2 | 1 | 2 |
| 39 | 2 | 2 | 1 | 2 |
| 40 | 1 | 2 | 1 | 2 |
| 41 | 2 | 2 | 1 | 2 |
| 42 | 2 | 2 | 1 | 2 |
| 43 | 2 | 2 | 1 | 2 |
| 44 | 2 | 2 | 2 | 2 |
| 45 | 1 | 2 | 2 | 2 |
| 46 | 1 | 2 | 1 | 2 |
| 47 | 2 | 2 | 1 | 2 |
| 48 | 1 | 2 | 1 | 2 |
| 49 | 2 | 2 | 2 | 1 |
| 50 | 2 | 2 | 1 | 2 |
| 51 | 1 | 2 | 1 | 2 |
| 52 | 1 | 2 | 1 | 2 |
| 53 | 1 | 2 | 2 | 2 |
| 54 | 2 | 2 | 2 | 2 |
| 55 | 2 | 2 | 1 | 2 |
| 56 | 2 | 2 | 2 | 2 |
| 57 | 2 | 2 | 2 | 2 |
| 58 | 2 | 2 | 1 | 2 |
| 59 | 1 | 2 | 2 | 2 |
| 60 | 2 | 2 | 1 | 2 |

For peer review only

|    |   |   |   |   |
|----|---|---|---|---|
| 1  |   |   |   |   |
| 2  | 1 | 2 | 1 | 2 |
| 3  | 2 | 2 | 1 | 2 |
| 4  | 1 | 2 | 1 | 2 |
| 5  | 2 | 2 | 1 | 2 |
| 6  | 2 | 2 | 2 | 2 |
| 7  | 2 | 2 | 2 | 2 |
| 8  | 1 | 2 | 2 | 2 |
| 9  | 2 | 2 | 2 | 2 |
| 10 | 2 | 2 | 1 | 2 |
| 11 | 1 | 2 | 2 | 2 |
| 12 | 2 | 2 | 2 | 2 |
| 13 | 2 | 2 | 2 | 2 |
| 14 | 1 | 2 | 1 | 2 |
| 15 | 1 | 2 | 1 | 2 |
| 16 | 2 | 2 | 1 | 2 |
| 17 | 1 | 2 | 1 | 2 |
| 18 | 2 | 2 | 1 | 2 |
| 19 | 2 | 2 | 1 | 2 |
| 20 | 2 | 2 | 1 | 2 |
| 21 | 2 | 2 | 1 | 2 |
| 22 | 2 | 2 | 2 | 2 |
| 23 | 2 | 2 | 1 | 2 |
| 24 | 2 | 2 | 1 | 2 |
| 25 | 1 | 2 | 2 | 2 |
| 26 | 2 | 2 | 1 | 2 |
| 27 | 1 | 2 | 2 | 2 |
| 28 | 1 | 2 | 1 | 2 |
| 29 | 1 | 2 | 1 | 2 |
| 30 | 1 | 2 | 1 | 2 |
| 31 | 2 | 2 | 2 | 2 |
| 32 | 1 | 2 | 1 | 2 |
| 33 | 2 | 2 | 1 | 2 |
| 34 | 1 | 2 | 2 | 2 |
| 35 | 2 | 2 | 2 | 2 |
| 36 | 2 | 2 | 2 | 2 |
| 37 | 2 | 2 | 1 | 2 |
| 38 | 1 | 2 | 1 | 2 |
| 39 | 2 | 2 | 2 | 2 |
| 40 | 2 | 2 | 1 | 2 |
| 41 | 2 | 2 | 1 | 2 |
| 42 | 2 | 2 | 1 | 2 |
| 43 | 1 | 2 | 2 | 2 |
| 44 | 2 | 2 | 1 | 2 |
| 45 | 2 | 2 | 1 | 2 |
| 46 | 2 | 2 | 2 | 2 |
| 47 | 2 | 2 | 2 | 2 |
| 48 | 2 | 2 | 2 | 2 |
| 49 | 1 | 2 | 1 | 2 |
| 50 | 2 | 2 | 1 | 2 |
| 51 | 2 | 2 | 2 | 2 |
| 52 | 1 | 2 | 1 | 2 |
| 53 | 1 | 2 | 1 | 2 |
| 54 | 1 | 2 | 2 | 2 |
| 55 | 2 | 2 | 1 | 2 |
| 56 | 2 | 2 | 2 | 2 |
| 57 | 2 | 2 | 1 | 2 |
| 58 | 2 | 2 | 2 | 2 |
| 59 | 2 | 2 | 2 | 2 |
| 60 | 2 | 2 | 1 | 2 |
|    | 2 | 2 | 1 | 2 |

|    |   |   |   |   |
|----|---|---|---|---|
| 1  |   |   |   |   |
| 2  | 2 | 2 | 1 | 2 |
| 3  | 2 | 2 | 1 | 2 |
| 4  |   |   |   |   |
| 5  |   |   |   |   |
| 6  |   |   |   |   |
| 7  |   |   |   |   |
| 8  |   |   |   |   |
| 9  |   |   |   |   |
| 10 |   |   |   |   |
| 11 |   |   |   |   |
| 12 |   |   |   |   |
| 13 |   |   |   |   |
| 14 |   |   |   |   |
| 15 |   |   |   |   |
| 16 |   |   |   |   |
| 17 |   |   |   |   |
| 18 |   |   |   |   |
| 19 |   |   |   |   |
| 20 |   |   |   |   |
| 21 |   |   |   |   |
| 22 |   |   |   |   |
| 23 |   |   |   |   |
| 24 |   |   |   |   |
| 25 |   |   |   |   |
| 26 |   |   |   |   |
| 27 |   |   |   |   |
| 28 |   |   |   |   |
| 29 |   |   |   |   |
| 30 |   |   |   |   |
| 31 |   |   |   |   |
| 32 |   |   |   |   |
| 33 |   |   |   |   |
| 34 |   |   |   |   |
| 35 |   |   |   |   |
| 36 |   |   |   |   |
| 37 |   |   |   |   |
| 38 |   |   |   |   |
| 39 |   |   |   |   |
| 40 |   |   |   |   |
| 41 |   |   |   |   |
| 42 |   |   |   |   |
| 43 |   |   |   |   |
| 44 |   |   |   |   |
| 45 |   |   |   |   |
| 46 |   |   |   |   |
| 47 |   |   |   |   |
| 48 |   |   |   |   |
| 49 |   |   |   |   |
| 50 |   |   |   |   |
| 51 |   |   |   |   |
| 52 |   |   |   |   |
| 53 |   |   |   |   |
| 54 |   |   |   |   |
| 55 |   |   |   |   |
| 56 |   |   |   |   |
| 57 |   |   |   |   |
| 58 |   |   |   |   |
| 59 |   |   |   |   |
| 60 |   |   |   |   |

For peer review only

|    | HO_FU | IWGDFcat | IWGDF_cat_4 |
|----|-------|----------|-------------|
| 1  |       |          |             |
| 2  |       |          |             |
| 3  |       |          |             |
| 4  | 2     | 21       | 2           |
| 5  | 2     | 0        | 0           |
| 6  | 2     | 0        | 0           |
| 7  | 2     | 0        | 0           |
| 8  | 2     | 21       | 2           |
| 9  | 2     | 0        | 0           |
| 10 | 2     | 0        | 0           |
| 11 | 2     | 0        | 0           |
| 12 | 2     | 0        | 0           |
| 13 | 2     | 32       | 4           |
| 14 | 2     | 0        | 0           |
| 15 | 2     | 0        | 0           |
| 16 | 2     | 1        | 1           |
| 17 | 2     | 1        | 1           |
| 18 | 2     | 1        | 1           |
| 19 | 2     | 1        | 1           |
| 20 | 2     | 0        | 0           |
| 21 | 2     | 0        | 0           |
| 22 | 2     | 0        | 0           |
| 23 | 2     | 0        | 0           |
| 24 | 1     | 31       | 3           |
| 25 | 1     | 31       | 3           |
| 26 | 2     | 0        | 0           |
| 27 | 2     | 32       | 4           |
| 28 | 2     | 32       | 4           |
| 29 | 2     | 21       | 2           |
| 30 | 2     | 0        | 0           |
| 31 | 2     | 0        | 0           |
| 32 | 2     | 0        | 0           |
| 33 | 2     | 1        | 1           |
| 34 | 2     | 0        | 0           |
| 35 | 2     | 0        | 0           |
| 36 | 2     | 0        | 0           |
| 37 | 2     | 0        | 0           |
| 38 | 2     | 0        | 0           |
| 39 | 2     | 0        | 0           |
| 40 | 2     | 0        | 0           |
| 41 | 2     | 0        | 0           |
| 42 | 1     | 31       | 3           |
| 43 | 2     | 0        | 0           |
| 44 | 2     | 21       | 2           |
| 45 | 2     | 0        | 0           |
| 46 | 1     | 31       | 3           |
| 47 | 2     | 0        | 0           |
| 48 | 2     | 21       | 2           |
| 49 | 2     | 21       | 2           |
| 50 | 1     | 31       | 3           |
| 51 | 2     | 0        | 0           |
| 52 | 2     | 0        | 0           |
| 53 | 2     | 0        | 0           |
| 54 | 2     | 0        | 0           |
| 55 | 1     | 31       | 3           |
| 56 | 1     | 31       | 3           |
| 57 | 2     | 0        | 0           |
| 58 | 2     | 32       | 4           |
| 59 | 2     | 0        | 0           |
| 60 | 2     | 32       | 4           |

|    |   |    |   |
|----|---|----|---|
| 1  |   |    |   |
| 2  | 2 | 32 | 4 |
| 3  | 2 | 0  | 0 |
| 4  | 2 | 0  | 0 |
| 5  | 2 | 0  | 0 |
| 6  | 2 | 1  | 1 |
| 7  | 2 | 0  | 0 |
| 8  | 2 | 0  | 0 |
| 9  | 2 | 0  | 0 |
| 10 | 2 | 32 | 4 |
| 11 | 2 | 21 | 2 |
| 12 | 2 | 0  | 0 |
| 13 | 2 | 0  | 0 |
| 14 | 1 | 31 | 3 |
| 15 | 2 | 0  | 0 |
| 16 | 2 | 32 | 4 |
| 17 | 2 | 0  | 0 |
| 18 | 2 | 0  | 0 |
| 19 | 2 | 0  | 0 |
| 20 | 2 | 32 | 4 |
| 21 | 1 | 32 | 4 |
| 22 | 2 | 0  | 0 |
| 23 | 2 | 0  | 0 |
| 24 | 2 | 0  | 0 |
| 25 | 2 | 32 | 4 |
| 26 | 2 | 1  | 1 |
| 27 | 2 | 0  | 0 |
| 28 | 2 | 32 | 4 |
| 29 | 2 | 0  | 0 |
| 30 | 2 | 0  | 0 |
| 31 | 2 | 0  | 0 |
| 32 | 2 | 1  | 1 |
| 33 | 2 | 0  | 0 |
| 34 | 2 | 0  | 0 |
| 35 | 2 | 0  | 0 |
| 36 | 2 | 0  | 0 |
| 37 | 2 | 1  | 1 |
| 38 | 2 | 0  | 0 |
| 39 | 2 | 0  | 0 |
| 40 | 2 | 1  | 1 |
| 41 | 1 | 31 | 3 |
| 42 | 2 | 0  | 0 |
| 43 | 2 | 0  | 0 |
| 44 | 2 | 0  | 0 |
| 45 | 2 | 0  | 0 |
| 46 | 2 | 32 | 4 |
| 47 | 1 | 31 | 3 |
| 48 | 2 | 0  | 0 |
| 49 | 2 | 0  | 0 |
| 50 | 2 | 0  | 0 |
| 51 | 2 | 0  | 0 |
| 52 | 2 | 0  | 0 |
| 53 | 2 | 0  | 0 |
| 54 | 1 | 31 | 3 |
| 55 | 2 | 21 | 2 |
| 56 | 1 | 31 | 3 |
| 57 | 2 | 0  | 0 |
| 58 | 2 | 1  | 1 |
| 59 | 2 | 0  | 0 |
| 60 | 2 | 0  | 0 |

|    |   |    |   |
|----|---|----|---|
| 1  |   |    |   |
| 2  | 2 | 0  | 0 |
| 3  | 2 | 0  | 0 |
| 4  | 2 | 0  | 0 |
| 5  | 2 | 1  | 1 |
| 6  | 2 | 0  | 0 |
| 7  | 2 | 0  | 0 |
| 8  | 2 | 0  | 0 |
| 9  | 2 | 32 | 4 |
| 10 | 2 | 0  | 0 |
| 11 | 2 | 0  | 0 |
| 12 | 2 | 21 | 2 |
| 13 | 2 | 0  | 0 |
| 14 | 2 | 0  | 0 |
| 15 | 2 | 0  | 0 |
| 16 | 2 | 0  | 0 |
| 17 | 2 | 21 | 2 |
| 18 | 2 | 21 | 2 |
| 19 | 2 | 1  | 1 |
| 20 | 2 | 0  | 0 |
| 21 | 2 | 0  | 0 |
| 22 | 2 | 0  | 0 |
| 23 | 2 | 0  | 0 |
| 24 | 2 | 0  | 0 |
| 25 | 2 | 0  | 0 |
| 26 | 2 | 0  | 0 |
| 27 | 2 | 32 | 4 |
| 28 | 1 | 32 | 4 |
| 29 | 2 | 0  | 0 |
| 30 | 2 | 0  | 0 |
| 31 | 2 | 0  | 0 |
| 32 | 2 | 0  | 0 |
| 33 | 2 | 0  | 0 |
| 34 | 2 | 0  | 0 |
| 35 | 2 | 0  | 0 |
| 36 | 2 | 21 | 2 |
| 37 | 2 | 1  | 1 |
| 38 | 2 | 0  | 0 |
| 39 | 2 | 0  | 0 |
| 40 | 2 | 0  | 0 |
| 41 | 2 | 0  | 0 |
| 42 | 2 | 32 | 4 |
| 43 | 2 | 0  | 0 |
| 44 | 1 | 31 | 3 |
| 45 | 2 | 21 | 2 |
| 46 | 2 | 32 | 4 |
| 47 | 2 | 1  | 1 |
| 48 | 2 | 0  | 0 |
| 49 | 2 | 0  | 0 |
| 50 | 2 | 0  | 0 |
| 51 | 2 | 0  | 0 |
| 52 | 2 | 0  | 0 |
| 53 | 2 | 0  | 0 |
| 54 | 1 | 31 | 3 |
| 55 | 2 | 0  | 0 |
| 56 | 2 | 1  | 1 |
| 57 | 2 | 0  | 0 |
| 58 | 1 | 32 | 4 |
| 59 | 2 | 32 | 4 |
| 60 | 2 | 32 | 4 |

|    |   |    |   |
|----|---|----|---|
| 1  |   |    |   |
| 2  | 2 | 0  | 0 |
| 3  | 2 | 0  | 0 |
| 4  | 1 | 31 | 3 |
| 5  | 2 | 32 | 4 |
| 6  | 1 | 31 | 3 |
| 7  | 2 | 21 | 2 |
| 8  | 1 | 31 | 3 |
| 9  | 2 | 21 | 2 |
| 10 | 2 | 21 | 2 |
| 11 | 2 | 21 | 2 |
| 12 | 1 | 32 | 4 |
| 13 | 1 | 31 | 3 |
| 14 | 2 | 21 | 2 |
| 15 | 2 | 0  | 0 |
| 16 | 1 | 31 | 3 |
| 17 | 2 | 0  | 0 |
| 18 | 2 | 0  | 0 |
| 19 | 2 | 0  | 0 |
| 20 | 2 | 0  | 0 |
| 21 | 2 | 0  | 0 |
| 22 | 2 | 32 | 4 |
| 23 | 2 | 21 | 2 |
| 24 | 2 | 0  | 0 |
| 25 | 2 | 21 | 2 |
| 26 | 2 | 0  | 0 |
| 27 | 2 | 0  | 0 |
| 28 | 2 | 0  | 0 |
| 29 | 1 | 31 | 3 |
| 30 | 1 | 32 | 4 |
| 31 | 2 | 0  | 0 |
| 32 | 2 | 21 | 2 |
| 33 | 2 | 0  | 0 |
| 34 | 2 | 0  | 0 |
| 35 | 2 | 0  | 0 |
| 36 | 2 | 0  | 0 |
| 37 | 2 | 0  | 0 |
| 38 | 2 | 0  | 0 |
| 39 | 2 | 0  | 0 |
| 40 | 2 | 0  | 0 |
| 41 | 1 | 32 | 4 |
| 42 | 1 | 31 | 3 |
| 43 | 2 | 21 | 2 |
| 44 | 2 | 0  | 0 |
| 45 | 2 | 32 | 4 |
| 46 | 2 | 0  | 0 |
| 47 | 2 | 1  | 1 |
| 48 | 2 | 0  | 0 |
| 49 | 2 | 0  | 0 |
| 50 | 2 | 0  | 0 |
| 51 | 2 | 21 | 2 |
| 52 | 2 | 0  | 0 |
| 53 | 2 | 0  | 0 |
| 54 | 2 | 0  | 0 |
| 55 | 2 | 0  | 0 |
| 56 | 2 | 0  | 0 |
| 57 | 2 | 0  | 0 |
| 58 | 2 | 0  | 0 |
| 59 | 2 | 0  | 0 |
| 60 | 2 | 0  | 0 |
|    | 2 | 0  | 0 |

|    |   |    |   |
|----|---|----|---|
| 1  |   |    |   |
| 2  | 2 | 32 | 4 |
| 3  | 2 | 21 | 2 |
| 4  | 2 | 0  | 0 |
| 5  | 1 | 31 | 3 |
| 6  | 2 | 0  | 0 |
| 7  | 2 | 0  | 0 |
| 8  | 1 | 32 | 4 |
| 9  | 2 | 0  | 0 |
| 10 | 2 | 0  | 0 |
| 11 | 2 | 32 | 4 |
| 12 | 2 | 0  | 0 |
| 13 | 2 | 0  | 0 |
| 14 | 1 | 31 | 3 |
| 15 | 1 | 31 | 3 |
| 16 | 2 | 0  | 0 |
| 17 | 1 | 31 | 3 |
| 18 | 2 | 21 | 2 |
| 19 | 2 | 0  | 0 |
| 20 | 2 | 0  | 0 |
| 21 | 2 | 1  | 1 |
| 22 | 2 | 0  | 0 |
| 23 | 2 | 21 | 2 |
| 24 | 2 | 0  | 0 |
| 25 | 2 | 0  | 0 |
| 26 | 2 | 0  | 0 |
| 27 | 2 | 0  | 0 |
| 28 | 2 | 0  | 0 |
| 29 | 2 | 1  | 1 |
| 30 | 2 | 21 | 2 |
| 31 | 2 | 0  | 0 |
| 32 | 2 | 0  | 0 |
| 33 | 2 | 0  | 0 |
| 34 | 2 | 21 | 2 |
| 35 | 2 | 21 | 2 |
| 36 | 2 | 0  | 0 |
| 37 | 2 | 0  | 0 |
| 38 | 2 | 0  | 0 |
| 39 | 2 | 0  | 0 |
| 40 | 2 | 0  | 0 |
| 41 | 2 | 0  | 0 |
| 42 | 2 | 0  | 0 |
| 43 | 2 | 0  | 0 |
| 44 | 1 | 31 | 3 |
| 45 | 2 | 0  | 0 |
| 46 | 2 | 0  | 0 |
| 47 | 2 | 0  | 0 |
| 48 | 2 | 0  | 0 |
| 49 | 1 | 31 | 3 |
| 50 | 2 | 32 | 4 |
| 51 | 2 | 32 | 4 |
| 52 | 2 | 0  | 0 |
| 53 | 2 | 0  | 0 |
| 54 | 2 | 0  | 0 |
| 55 | 2 | 0  | 0 |
| 56 | 2 | 0  | 0 |
| 57 | 2 | 0  | 0 |
| 58 | 2 | 0  | 0 |
| 59 | 2 | 0  | 0 |
| 60 | 2 | 0  | 0 |
|    | 2 | 0  | 0 |



|    |   |    |   |
|----|---|----|---|
| 1  |   |    |   |
| 2  | 2 | 32 | 4 |
| 3  | 2 | 0  | 0 |
| 4  | 1 | 31 | 3 |
| 5  | 1 | 31 | 3 |
| 6  | 2 | 0  | 0 |
| 7  | 1 | 31 | 3 |
| 8  | 2 | 0  | 0 |
| 9  | 2 | 21 | 2 |
| 10 | 2 | 0  | 0 |
| 11 | 2 | 0  | 0 |
| 12 | 2 | 0  | 0 |
| 13 | 2 | 0  | 0 |
| 14 | 2 | 0  | 0 |
| 15 | 2 | 0  | 0 |
| 16 | 1 | 31 | 3 |
| 17 | 1 | 31 | 3 |
| 18 | 2 | 21 | 2 |
| 19 | 1 | 31 | 3 |
| 20 | 2 | 0  | 0 |
| 21 | 2 | 0  | 0 |
| 22 | 2 | 0  | 0 |
| 23 | 2 | 21 | 2 |
| 24 | 2 | 21 | 2 |
| 25 | 2 | 0  | 0 |
| 26 | 1 | 31 | 3 |
| 27 | 2 | 0  | 0 |
| 28 | 1 | 31 | 3 |
| 29 | 2 | 0  | 0 |
| 30 | 2 | 0  | 0 |
| 31 | 1 | 31 | 3 |
| 32 | 1 | 31 | 3 |
| 33 | 1 | 31 | 3 |
| 34 | 1 | 31 | 3 |
| 35 | 2 | 0  | 0 |
| 36 | 2 | 0  | 0 |
| 37 | 2 | 0  | 0 |
| 38 | 2 | 0  | 0 |
| 39 | 1 | 31 | 3 |
| 40 | 1 | 31 | 3 |
| 41 | 2 | 21 | 2 |
| 42 | 1 | 31 | 3 |
| 43 | 2 | 0  | 0 |
| 44 | 2 | 0  | 0 |
| 45 | 1 | 31 | 3 |
| 46 | 1 | 31 | 3 |
| 47 | 2 | 0  | 0 |
| 48 | 1 | 31 | 3 |
| 49 | 2 | 0  | 0 |
| 50 | 1 | 31 | 3 |
| 51 | 2 | 0  | 0 |
| 52 | 1 | 32 | 4 |
| 53 | 2 | 0  | 0 |
| 54 | 2 | 0  | 0 |
| 55 | 2 | 32 | 4 |
| 56 | 2 | 0  | 0 |
| 57 | 1 | 31 | 3 |
| 58 | 1 | 31 | 3 |
| 59 | 1 | 31 | 3 |
| 60 | 2 | 0  | 0 |

|    |   |    |   |
|----|---|----|---|
| 1  |   |    |   |
| 2  | 1 | 31 | 3 |
| 3  | 2 | 0  | 0 |
| 4  | 2 | 0  | 0 |
| 5  | 2 | 0  | 0 |
| 6  | 2 | 32 | 4 |
| 7  | 1 | 31 | 3 |
| 8  | 2 | 0  | 0 |
| 9  | 1 | 32 | 4 |
| 10 | 2 | 21 | 2 |
| 11 | 2 | 0  | 0 |
| 12 | 2 | 0  | 0 |
| 13 | 2 | 0  | 0 |
| 14 | 2 | 0  | 0 |
| 15 | 2 | 0  | 0 |
| 16 | 2 | 0  | 0 |
| 17 | 2 | 0  | 0 |
| 18 | 1 | 31 | 3 |
| 19 | 2 | 32 | 4 |
| 20 | 1 | 31 | 3 |
| 21 | 2 | 0  | 0 |
| 22 | 2 | 0  | 0 |
| 23 | 1 | 32 | 4 |
| 24 | 2 | 0  | 0 |
| 25 | 1 | 31 | 3 |
| 26 | 2 | 0  | 0 |
| 27 | 1 | 31 | 3 |
| 28 | 2 | 0  | 0 |
| 29 | 2 | 32 | 4 |
| 30 | 1 | 31 | 3 |
| 31 | 2 | 1  | 1 |
| 32 | 2 | 0  | 0 |
| 33 | 2 | 21 | 2 |
| 34 | 2 | 0  | 0 |
| 35 | 2 | 32 | 4 |
| 36 | 2 | 21 | 2 |
| 37 | 2 | 21 | 2 |
| 38 | 2 | 0  | 0 |
| 39 | 1 | 32 | 4 |
| 40 | 2 | 32 | 4 |
| 41 | 1 | 31 | 3 |
| 42 | 1 | 31 | 3 |
| 43 | 1 | 31 | 3 |
| 44 | 2 | 0  | 0 |
| 45 | 2 | 0  | 0 |
| 46 | 1 | 31 | 3 |
| 47 | 2 | 0  | 0 |
| 48 | 2 | 0  | 0 |
| 49 | 1 | 31 | 3 |
| 50 | 2 | 0  | 0 |
| 51 | 2 | 0  | 0 |
| 52 | 2 | 21 | 2 |
| 53 | 2 | 21 | 2 |
| 54 | 2 | 0  | 0 |
| 55 | 2 | 0  | 0 |
| 56 | 2 | 0  | 0 |
| 57 | 2 | 0  | 0 |
| 58 | 2 | 0  | 0 |
| 59 | 2 | 1  | 1 |
| 60 | 2 | 21 | 2 |

|    |   |    |   |
|----|---|----|---|
| 1  |   |    |   |
| 2  | 2 | 21 | 2 |
| 3  | 2 | 21 | 2 |
| 4  | 2 | 0  | 0 |
| 5  | 2 | 0  | 0 |
| 6  | 2 | 21 | 2 |
| 7  | 2 | 0  | 0 |
| 8  | 2 | 0  | 0 |
| 9  | 1 | 31 | 3 |
| 10 | 2 | 0  | 0 |
| 11 | 1 | 31 | 3 |
| 12 | 2 | 21 | 2 |
| 13 | 2 | 0  | 0 |
| 14 | 2 | 0  | 0 |
| 15 | 1 | 31 | 3 |
| 16 | 2 | 32 | 4 |
| 17 | 2 | 21 | 2 |
| 18 | 2 | 21 | 2 |
| 19 | 2 | 21 | 2 |
| 20 | 2 | 0  | 0 |
| 21 | 2 | 21 | 2 |
| 22 | 2 | 32 | 4 |
| 23 | 2 | 32 | 4 |
| 24 | 2 | 0  | 0 |
| 25 | 2 | 21 | 2 |
| 26 | 2 | 21 | 2 |
| 27 | 2 | 0  | 0 |
| 28 | 2 | 0  | 0 |
| 29 | 2 | 0  | 0 |
| 30 | 2 | 0  | 0 |
| 31 | 2 | 21 | 2 |
| 32 | 2 | 32 | 4 |
| 33 | 2 | 0  | 0 |
| 34 | 2 | 21 | 2 |
| 35 | 2 | 0  | 0 |
| 36 | 2 | 0  | 0 |
| 37 | 2 | 0  | 0 |
| 38 | 2 | 0  | 0 |
| 39 | 2 | 0  | 0 |
| 40 | 2 | 1  | 1 |
| 41 | 2 | 32 | 4 |
| 42 | 2 | 0  | 0 |
| 43 | 2 | 0  | 0 |
| 44 | 2 | 0  | 0 |
| 45 | 2 | 21 | 2 |
| 46 | 2 | 0  | 0 |
| 47 | 2 | 0  | 0 |
| 48 | 2 | 0  | 0 |
| 49 | 1 | 31 | 3 |
| 50 | 2 | 0  | 0 |
| 51 | 1 | 31 | 3 |
| 52 | 2 | 0  | 0 |
| 53 | 2 | 1  | 1 |
| 54 | 2 | 0  | 0 |
| 55 | 2 | 0  | 0 |
| 56 | 2 | 0  | 0 |
| 57 | 1 | 32 | 4 |
| 58 | 2 | 0  | 0 |
| 59 | 2 | 0  | 0 |
| 60 | 2 | 0  | 0 |
|    | 1 | 31 | 3 |

|    |   |    |   |
|----|---|----|---|
| 1  |   |    |   |
| 2  | 2 | 0  | 0 |
| 3  | 2 | 0  | 0 |
| 4  | 2 | 0  | 0 |
| 5  | 2 | 0  | 0 |
| 6  | 2 | 0  | 0 |
| 7  | 2 | 0  | 0 |
| 8  | 1 | 31 | 3 |
| 9  | 2 | 0  | 0 |
| 10 | 2 | 0  | 0 |
| 11 | 2 | 0  | 0 |
| 12 | 2 | 0  | 0 |
| 13 | 2 | 0  | 0 |
| 14 | 2 | 0  | 0 |
| 15 | 1 | 31 | 3 |
| 16 | 2 | 0  | 0 |
| 17 | 1 | 31 | 3 |
| 18 | 2 | 0  | 0 |
| 19 | 2 | 0  | 0 |
| 20 | 2 | 0  | 0 |
| 21 | 2 | 0  | 0 |
| 22 | 2 | 0  | 0 |
| 23 | 2 | 0  | 0 |
| 24 | 2 | 0  | 0 |
| 25 | 1 | 31 | 3 |
| 26 | 1 | 32 | 4 |
| 27 | 2 | 0  | 0 |
| 28 | 2 | 0  | 0 |
| 29 | 2 | 0  | 0 |
| 30 | 2 | 0  | 0 |
| 31 | 1 | 31 | 3 |
| 32 | 2 | 0  | 0 |
| 33 | 2 | 0  | 0 |
| 34 | 1 | 31 | 3 |
| 35 | 1 | 31 | 3 |
| 36 | 2 | 0  | 0 |
| 37 | 2 | 0  | 0 |
| 38 | 2 | 0  | 0 |
| 39 | 2 | 0  | 0 |
| 40 | 2 | 0  | 0 |
| 41 | 2 | 0  | 0 |
| 42 | 2 | 0  | 0 |
| 43 | 2 | 1  | 1 |
| 44 | 2 | 0  | 0 |
| 45 | 2 | 0  | 0 |
| 46 | 2 | 0  | 0 |
| 47 | 2 | 0  | 0 |
| 48 | 2 | 0  | 0 |
| 49 | 2 | 0  | 0 |
| 50 | 2 | 0  | 0 |
| 51 | 2 | 0  | 0 |
| 52 | 2 | 0  | 0 |
| 53 | 2 | 0  | 0 |
| 54 | 2 | 0  | 0 |
| 55 | 1 | 31 | 3 |
| 56 | 2 | 0  | 0 |
| 57 | 2 | 0  | 0 |
| 58 | 1 | 31 | 3 |
| 59 | 1 | 31 | 3 |
| 60 | 2 | 0  | 0 |

|    |   |    |   |
|----|---|----|---|
| 1  |   |    |   |
| 2  | 2 | 0  | 0 |
| 3  | 2 | 0  | 0 |
| 4  | 2 | 0  | 0 |
| 5  | 2 | 0  | 0 |
| 6  | 2 | 0  | 0 |
| 7  | 1 | 31 | 3 |
| 8  | 1 | 31 | 3 |
| 9  | 2 | 0  | 0 |
| 10 | 2 | 0  | 0 |
| 11 | 2 | 0  | 0 |
| 12 | 2 | 0  | 0 |
| 13 | 2 | 0  | 0 |
| 14 | 2 | 32 | 4 |
| 15 | 2 | 0  | 0 |
| 16 | 2 | 0  | 0 |
| 17 | 2 | 0  | 0 |
| 18 | 2 | 0  | 0 |
| 19 | 2 | 0  | 0 |
| 20 | 2 | 0  | 0 |
| 21 | 2 | 0  | 0 |
| 22 | 2 | 0  | 0 |
| 23 | 2 | 0  | 0 |
| 24 | 2 | 0  | 0 |
| 25 | 1 | 31 | 3 |
| 26 | 2 | 0  | 0 |
| 27 | 2 | 0  | 0 |
| 28 | 1 | 31 | 3 |
| 29 | 1 | 31 | 3 |
| 30 | 1 | 31 | 3 |
| 31 | 2 | 0  | 0 |
| 32 | 2 | 0  | 0 |
| 33 | 1 | 31 | 3 |
| 34 | 2 | 0  | 0 |
| 35 | 2 | 0  | 0 |
| 36 | 2 | 0  | 0 |
| 37 | 2 | 0  | 0 |
| 38 | 2 | 32 | 4 |
| 39 | 2 | 0  | 0 |
| 40 | 2 | 0  | 0 |
| 41 | 2 | 0  | 0 |
| 42 | 2 | 0  | 0 |
| 43 | 2 | 0  | 0 |
| 44 | 1 | 31 | 3 |
| 45 | 2 | 0  | 0 |
| 46 | 2 | 0  | 0 |
| 47 | 2 | 0  | 0 |
| 48 | 2 | 21 | 2 |
| 49 | 2 | 0  | 0 |
| 50 | 2 | 21 | 2 |
| 51 | 1 | 31 | 3 |
| 52 | 1 | 31 | 3 |
| 53 | 1 | 31 | 3 |
| 54 | 2 | 0  | 0 |
| 55 | 1 | 31 | 3 |
| 56 | 1 | 31 | 3 |
| 57 | 1 | 31 | 3 |
| 58 | 1 | 31 | 3 |
| 59 | 2 | 21 | 2 |
| 60 | 2 | 0  | 0 |
|    | 1 | 31 | 3 |

|    |   |    |   |
|----|---|----|---|
| 1  |   |    |   |
| 2  | 2 | 0  | 0 |
| 3  | 2 | 0  | 0 |
| 4  | 1 | 31 | 3 |
| 5  | 1 | 31 | 3 |
| 6  | 1 | 31 | 3 |
| 7  | 1 | 31 | 3 |
| 8  | 2 | 0  | 0 |
| 9  | 2 | 0  | 0 |
| 10 | 2 | 0  | 0 |
| 11 | 1 | 31 | 3 |
| 12 | 2 | 0  | 0 |
| 13 | 2 | 0  | 0 |
| 14 | 2 | 0  | 0 |
| 15 | 2 | 32 | 4 |
| 16 | 2 | 0  | 0 |
| 17 | 2 | 1  | 1 |
| 18 | 2 | 0  | 0 |
| 19 | 2 | 0  | 0 |
| 20 | 2 | 0  | 0 |
| 21 | 2 | 0  | 0 |
| 22 | 2 | 0  | 0 |
| 23 | 2 | 0  | 0 |
| 24 | 2 | 0  | 0 |
| 25 | 2 | 32 | 4 |
| 26 | 2 | 0  | 0 |
| 27 | 1 | 31 | 3 |
| 28 | 1 | 31 | 3 |
| 29 | 2 | 21 | 2 |
| 30 | 2 | 0  | 0 |
| 31 | 2 | 0  | 0 |
| 32 | 2 | 0  | 0 |
| 33 | 1 | 31 | 3 |
| 34 | 2 | 0  | 0 |
| 35 | 1 | 31 | 3 |
| 36 | 1 | 31 | 3 |
| 37 | 2 | 1  | 1 |
| 38 | 2 | 0  | 0 |
| 39 | 2 | 0  | 0 |
| 40 | 2 | 0  | 0 |
| 41 | 2 | 0  | 0 |
| 42 | 2 | 0  | 0 |
| 43 | 2 | 0  | 0 |
| 44 | 1 | 32 | 4 |
| 45 | 1 | 31 | 3 |
| 46 | 1 | 31 | 3 |
| 47 | 1 | 31 | 3 |
| 48 | 2 | 0  | 0 |
| 49 | 2 | 0  | 0 |
| 50 | 2 | 0  | 0 |
| 51 | 2 | 0  | 0 |
| 52 | 2 | 0  | 0 |
| 53 | 2 | 0  | 0 |
| 54 | 2 | 0  | 0 |
| 55 | 2 | 0  | 0 |
| 56 | 2 | 0  | 0 |
| 57 | 2 | 0  | 0 |
| 58 | 2 | 0  | 0 |
| 59 | 2 | 0  | 0 |
| 60 | 2 | 0  | 0 |
|    | 2 | 0  | 0 |

|    |   |    |   |
|----|---|----|---|
| 1  |   |    |   |
| 2  | 1 | 32 | 4 |
| 3  | 2 | 0  | 0 |
| 4  | 2 | 0  | 0 |
| 5  | 2 | 1  | 1 |
| 6  | 1 | 31 | 3 |
| 7  | 2 | 0  | 0 |
| 8  | 2 | 0  | 0 |
| 9  | 2 | 0  | 0 |
| 10 | 2 | 0  | 0 |
| 11 | 2 | 0  | 0 |
| 12 | 2 | 0  | 0 |
| 13 | 2 | 0  | 0 |
| 14 | 2 | 0  | 0 |
| 15 | 2 | 0  | 0 |
| 16 | 1 | 31 | 3 |
| 17 | 2 | 1  | 1 |
| 18 | 2 | 0  | 0 |
| 19 | 2 | 0  | 0 |
| 20 | 2 | 0  | 0 |
| 21 | 2 | 0  | 0 |
| 22 | 2 | 0  | 0 |
| 23 | 2 | 0  | 0 |
| 24 | 2 | 0  | 0 |
| 25 | 2 | 0  | 0 |
| 26 | 2 | 0  | 0 |
| 27 | 2 | 0  | 0 |
| 28 | 2 | 0  | 0 |
| 29 | 2 | 0  | 0 |
| 30 | 2 | 0  | 0 |
| 31 | 2 | 21 | 2 |
| 32 | 2 | 0  | 0 |
| 33 | 2 | 32 | 4 |
| 34 | 1 | 31 | 3 |
| 35 | 2 | 0  | 0 |
| 36 | 2 | 0  | 0 |
| 37 | 2 | 0  | 0 |
| 38 | 2 | 0  | 0 |
| 39 | 2 | 0  | 0 |
| 40 | 2 | 21 | 2 |
| 41 | 2 | 1  | 1 |
| 42 | 2 | 32 | 4 |
| 43 | 2 | 1  | 1 |
| 44 | 2 | 0  | 0 |
| 45 | 2 | 0  | 0 |
| 46 | 2 | 0  | 0 |
| 47 | 1 | 31 | 3 |
| 48 | 2 | 0  | 0 |
| 49 | 2 | 0  | 0 |
| 50 | 2 | 0  | 0 |
| 51 | 2 | 0  | 0 |
| 52 | 2 | 21 | 2 |
| 53 | 2 | 0  | 0 |
| 54 | 2 | 0  | 0 |
| 55 | 2 | 0  | 0 |
| 56 | 1 | 31 | 3 |
| 57 | 2 | 0  | 0 |
| 58 | 2 | 0  | 0 |
| 59 | 1 | 31 | 3 |
| 60 | 2 | 0  | 0 |

|    |   |    |   |
|----|---|----|---|
| 1  |   |    |   |
| 2  | 1 | 31 | 3 |
| 3  | 2 | 0  | 0 |
| 4  | 2 | 0  | 0 |
| 5  | 2 | 0  | 0 |
| 6  | 2 | 0  | 0 |
| 7  | 2 | 0  | 0 |
| 8  | 2 | 0  | 0 |
| 9  | 2 | 0  | 0 |
| 10 | 2 | 0  | 0 |
| 11 | 1 | 31 | 3 |
| 12 | 2 | 0  | 0 |
| 13 | 2 | 0  | 0 |
| 14 | 1 | 31 | 3 |
| 15 | 2 | 1  | 1 |
| 16 | 2 | 0  | 0 |
| 17 | 1 | 31 | 3 |
| 18 | 2 | 0  | 0 |
| 19 | 2 | 32 | 4 |
| 20 | 1 | 31 | 3 |
| 21 | 2 | 21 | 2 |
| 22 | 2 | 0  | 0 |
| 23 | 1 | 31 | 3 |
| 24 | 2 | 0  | 0 |
| 25 | 2 | 0  | 0 |
| 26 | 2 | 0  | 0 |
| 27 | 2 | 0  | 0 |
| 28 | 2 | 21 | 2 |
| 29 | 2 | 0  | 0 |
| 30 | 2 | 0  | 0 |
| 31 | 2 | 0  | 0 |
| 32 | 2 | 0  | 0 |
| 33 | 2 | 0  | 0 |
| 34 | 2 | 0  | 0 |
| 35 | 1 | 31 | 3 |
| 36 | 1 | 31 | 3 |
| 37 | 2 | 0  | 0 |
| 38 | 2 | 32 | 4 |
| 39 | 2 | 22 | 2 |
| 40 | 2 | 0  | 0 |
| 41 | 2 | 0  | 0 |
| 42 | 2 | 0  | 0 |
| 43 | 2 | 0  | 0 |
| 44 | 2 | 0  | 0 |
| 45 | 2 | 21 | 2 |
| 46 | 1 | 31 | 3 |
| 47 | 2 | 0  | 0 |
| 48 | 1 | 31 | 3 |
| 49 | 2 | 0  | 0 |
| 50 | 1 | 31 | 3 |
| 51 | 1 | 31 | 3 |
| 52 | 2 | 0  | 0 |
| 53 | 2 | 0  | 0 |
| 54 | 2 | 0  | 0 |
| 55 | 1 | 31 | 3 |
| 56 | 1 | 31 | 3 |
| 57 | 1 | 31 | 3 |
| 58 | 1 | 31 | 3 |
| 59 | 1 | 31 | 3 |
| 60 | 1 | 31 | 3 |



|    |   |    |   |
|----|---|----|---|
| 1  |   |    |   |
| 2  | 2 | 21 | 2 |
| 3  | 2 | 0  | 0 |
| 4  | 2 | 32 | 4 |
| 5  | 2 | 21 | 2 |
| 6  | 2 | 0  | 0 |
| 7  | 2 | 0  | 0 |
| 8  | 1 | 31 | 3 |
| 9  | 1 | 31 | 3 |
| 10 | 2 | 0  | 0 |
| 11 | 2 | 0  | 0 |
| 12 | 1 | 31 | 3 |
| 13 | 2 | 21 | 2 |
| 14 | 2 | 0  | 0 |
| 15 | 2 | 0  | 0 |
| 16 | 2 | 0  | 0 |
| 17 | 2 | 0  | 0 |
| 18 | 1 | 31 | 3 |
| 19 | 1 | 31 | 3 |
| 20 | 2 | 21 | 2 |
| 21 | 2 | 0  | 0 |
| 22 | 2 | 0  | 0 |
| 23 | 1 | 31 | 3 |
| 24 | 1 | 31 | 3 |
| 25 | 1 | 31 | 3 |
| 26 | 2 | 0  | 0 |
| 27 | 2 | 0  | 0 |
| 28 | 1 | 31 | 3 |
| 29 | 1 | 31 | 3 |
| 30 | 1 | 31 | 3 |
| 31 | 2 | 21 | 2 |
| 32 | 1 | 31 | 3 |
| 33 | 1 | 31 | 3 |
| 34 | 2 | 0  | 0 |
| 35 | 2 | 0  | 0 |
| 36 | 2 | 0  | 0 |
| 37 | 2 | 0  | 0 |
| 38 | 2 | 0  | 0 |
| 39 | 1 | 31 | 3 |
| 40 | 1 | 31 | 3 |
| 41 | 1 | 31 | 3 |
| 42 | 2 | 21 | 2 |
| 43 | 1 | 31 | 3 |
| 44 | 2 | 0  | 0 |
| 45 | 2 | 0  | 0 |
| 46 | 1 | 31 | 3 |
| 47 | 1 | 31 | 3 |
| 48 | 1 | 31 | 3 |
| 49 | 2 | 21 | 2 |
| 50 | 2 | 0  | 0 |
| 51 | 1 | 31 | 3 |
| 52 | 1 | 31 | 3 |
| 53 | 2 | 0  | 0 |
| 54 | 2 | 21 | 2 |
| 55 | 1 | 31 | 3 |
| 56 | 1 | 31 | 3 |
| 57 | 1 | 31 | 3 |
| 58 | 1 | 31 | 3 |
| 59 | 1 | 31 | 3 |
| 60 | 1 | 31 | 3 |
|    | 1 | 31 | 3 |

For peer review only

|    |   |    |   |
|----|---|----|---|
| 1  |   |    |   |
| 2  | 2 | 0  | 0 |
| 3  | 2 | 1  | 1 |
| 4  | 2 | 0  | 0 |
| 5  | 2 | 0  | 0 |
| 6  | 1 | 31 | 3 |
| 7  | 1 | 31 | 3 |
| 8  | 2 | 0  | 0 |
| 9  | 2 | 32 | 4 |
| 10 | 1 | 31 | 3 |
| 11 | 2 | 0  | 0 |
| 12 | 1 | 32 | 4 |
| 13 | 2 | 0  | 0 |
| 14 | 2 | 21 | 2 |
| 15 | 1 | 31 | 3 |
| 16 | 2 | 0  | 0 |
| 17 | 2 | 0  | 0 |
| 18 | 2 | 0  | 0 |
| 19 | 2 | 21 | 2 |
| 20 | 2 | 0  | 0 |
| 21 | 1 | 31 | 3 |
| 22 | 1 | 32 | 4 |
| 23 | 1 | 31 | 3 |
| 24 | 2 | 0  | 0 |
| 25 | 2 | 32 | 4 |
| 26 | 2 | 0  | 0 |
| 27 | 2 | 0  | 0 |
| 28 | 2 | 0  | 0 |
| 29 | 2 | 0  | 0 |
| 30 | 2 | 21 | 2 |
| 31 | 2 | 0  | 0 |
| 32 | 1 | 31 | 3 |
| 33 | 2 | 0  | 0 |
| 34 | 1 | 31 | 3 |
| 35 | 1 | 31 | 3 |
| 36 | 2 | 0  | 0 |
| 37 | 2 | 0  | 0 |
| 38 | 2 | 0  | 0 |
| 39 | 2 | 0  | 0 |
| 40 | 1 | 31 | 3 |
| 41 | 2 | 0  | 0 |
| 42 | 2 | 0  | 0 |
| 43 | 2 | 0  | 0 |
| 44 | 2 | 0  | 0 |
| 45 | 2 | 0  | 0 |
| 46 | 2 | 0  | 0 |
| 47 | 2 | 0  | 0 |
| 48 | 2 | 0  | 0 |
| 49 | 2 | 0  | 0 |
| 50 | 1 | 32 | 4 |
| 51 | 1 | 31 | 3 |
| 52 | 2 | 0  | 0 |
| 53 | 2 | 0  | 0 |
| 54 | 2 | 0  | 0 |
| 55 | 2 | 0  | 0 |
| 56 | 2 | 0  | 0 |
| 57 | 1 | 31 | 3 |
| 58 | 2 | 21 | 2 |
| 59 | 2 | 0  | 0 |
| 60 | 2 | 0  | 0 |

|    |   |    |   |
|----|---|----|---|
| 1  |   |    |   |
| 2  | 2 | 1  | 1 |
| 3  | 1 | 31 | 3 |
| 4  | 2 | 0  | 0 |
| 5  | 1 | 31 | 3 |
| 6  | 1 | 31 | 3 |
| 7  | 1 | 31 | 3 |
| 8  | 1 | 31 | 3 |
| 9  | 1 | 31 | 3 |
| 10 | 2 | 0  | 0 |
| 11 | 1 | 31 | 3 |
| 12 | 2 | 0  | 0 |
| 13 | 2 | 0  | 0 |
| 14 | 2 | 0  | 0 |
| 15 | 2 | 21 | 2 |
| 16 | 2 | 0  | 0 |
| 17 | 1 | 31 | 3 |
| 18 | 1 | 31 | 3 |
| 19 | 2 | 0  | 0 |
| 20 | 2 | 0  | 0 |
| 21 | 2 | 0  | 0 |
| 22 | 2 | 0  | 0 |
| 23 | 2 | 0  | 0 |
| 24 | 2 | 0  | 0 |
| 25 | 2 | 32 | 4 |
| 26 | 2 | 0  | 0 |
| 27 | 2 | 0  | 0 |
| 28 | 2 | 0  | 0 |
| 29 | 2 | 22 | 2 |
| 30 | 2 | 32 | 4 |
| 31 | 2 | 0  | 0 |
| 32 | 2 | 0  | 0 |
| 33 | 1 | 31 | 3 |
| 34 | 1 | 32 | 4 |
| 35 | 1 | 31 | 3 |
| 36 | 2 | 0  | 0 |
| 37 | 2 | 0  | 0 |
| 38 | 2 | 0  | 0 |
| 39 | 1 | 31 | 3 |
| 40 | 2 | 0  | 0 |
| 41 | 2 | 0  | 0 |
| 42 | 2 | 0  | 0 |
| 43 | 1 | 31 | 3 |
| 44 | 2 | 0  | 0 |
| 45 | 2 | 32 | 4 |
| 46 | 2 | 0  | 0 |
| 47 | 2 | 0  | 0 |
| 48 | 2 | 21 | 2 |
| 49 | 2 | 0  | 0 |
| 50 | 2 | 21 | 2 |
| 51 | 2 | 21 | 2 |
| 52 | 2 | 21 | 2 |
| 53 | 2 | 21 | 2 |
| 54 | 2 | 0  | 0 |
| 55 | 2 | 32 | 4 |
| 56 | 2 | 0  | 0 |
| 57 | 2 | 21 | 2 |
| 58 | 2 | 0  | 0 |
| 59 | 2 | 0  | 0 |
| 60 | 1 | 31 | 3 |
|    | 2 | 0  | 0 |

For peer review only

|    |   |    |   |
|----|---|----|---|
| 1  |   |    |   |
| 2  | 2 | 32 | 4 |
| 3  | 2 | 21 | 2 |
| 4  | 2 | 0  | 0 |
| 5  | 1 | 31 | 3 |
| 6  | 1 | 31 | 3 |
| 7  | 1 | 31 | 3 |
| 8  | 1 | 31 | 3 |
| 9  | 2 | 0  | 0 |
| 10 | 2 | 0  | 0 |
| 11 | 1 | 31 | 3 |
| 12 | 1 | 31 | 3 |
| 13 | 1 | 31 | 3 |
| 14 | 2 | 0  | 0 |
| 15 | 2 | 0  | 0 |
| 16 | 1 | 31 | 3 |
| 17 | 2 | 21 | 2 |
| 18 | 1 | 31 | 3 |
| 19 | 1 | 31 | 3 |
| 20 | 2 | 21 | 2 |
| 21 | 1 | 31 | 3 |
| 22 | 2 | 21 | 2 |
| 23 | 2 | 0  | 0 |
| 24 | 2 | 21 | 2 |
| 25 | 2 | 21 | 2 |
| 26 | 1 | 31 | 3 |
| 27 | 2 | 0  | 0 |
| 28 | 1 | 31 | 3 |
| 29 | 2 | 0  | 0 |
| 30 | 2 | 0  | 0 |
| 31 | 2 | 0  | 0 |
| 32 | 2 | 0  | 0 |
| 33 | 2 | 0  | 0 |
| 34 | 2 | 0  | 0 |
| 35 | 1 | 31 | 3 |
| 36 | 2 | 0  | 0 |
| 37 | 1 | 31 | 3 |
| 38 | 2 | 0  | 0 |
| 39 | 2 | 0  | 0 |
| 40 | 2 | 0  | 0 |
| 41 | 2 | 0  | 0 |
| 42 | 1 | 31 | 3 |
| 43 | 2 | 0  | 0 |
| 44 | 2 | 0  | 0 |
| 45 | 2 | 21 | 2 |
| 46 | 1 | 31 | 3 |
| 47 | 1 | 31 | 3 |
| 48 | 2 | 21 | 2 |
| 49 | 1 | 31 | 3 |
| 50 | 1 | 32 | 4 |
| 51 | 2 | 0  | 0 |
| 52 | 1 | 32 | 4 |
| 53 | 1 | 32 | 4 |
| 54 | 2 | 0  | 0 |
| 55 | 2 | 32 | 4 |
| 56 | 2 | 21 | 2 |
| 57 | 1 | 31 | 3 |
| 58 | 2 | 0  | 0 |
| 59 | 2 | 0  | 0 |
| 60 | 2 | 0  | 0 |
|    | 1 | 31 | 3 |

|    |   |    |   |
|----|---|----|---|
| 1  |   |    |   |
| 2  | 2 | 32 | 4 |
| 3  | 1 | 32 | 4 |
| 4  | 2 | 0  | 0 |
| 5  | 1 | 31 | 3 |
| 6  | 2 | 0  | 0 |
| 7  | 2 | 0  | 0 |
| 8  | 2 | 0  | 0 |
| 9  | 2 | 21 | 2 |
| 10 | 1 | 31 | 3 |
| 11 | 1 | 31 | 3 |
| 12 | 2 | 32 | 4 |
| 13 | 2 | 0  | 0 |
| 14 | 2 | 0  | 0 |
| 15 | 2 | 0  | 0 |
| 16 | 2 | 0  | 0 |
| 17 | 2 | 0  | 0 |
| 18 | 2 | 0  | 0 |
| 19 | 2 | 0  | 0 |
| 20 | 2 | 21 | 2 |
| 21 | 1 | 31 | 3 |
| 22 | 2 | 32 | 4 |
| 23 | 2 | 0  | 0 |
| 24 | 2 | 32 | 4 |
| 25 | 2 | 0  | 0 |
| 26 | 2 | 0  | 0 |
| 27 | 2 | 0  | 0 |
| 28 | 2 | 21 | 2 |
| 29 | 2 | 0  | 0 |
| 30 | 1 | 31 | 3 |
| 31 | 1 | 31 | 3 |
| 32 | 1 | 31 | 3 |
| 33 | 1 | 31 | 3 |
| 34 | 1 | 31 | 3 |
| 35 | 2 | 0  | 0 |
| 36 | 2 | 0  | 0 |
| 37 | 2 | 0  | 0 |
| 38 | 2 | 0  | 0 |
| 39 | 1 | 31 | 3 |
| 40 | 2 | 0  | 0 |
| 41 | 2 | 0  | 0 |
| 42 | 2 | 0  | 0 |
| 43 | 2 | 32 | 4 |
| 44 | 2 | 0  | 0 |
| 45 | 2 | 0  | 0 |
| 46 | 2 | 0  | 0 |
| 47 | 2 | 0  | 0 |
| 48 | 2 | 0  | 0 |
| 49 | 2 | 0  | 0 |
| 50 | 2 | 32 | 4 |
| 51 | 2 | 0  | 0 |
| 52 | 2 | 0  | 0 |
| 53 | 2 | 0  | 0 |
| 54 | 2 | 0  | 0 |
| 55 | 2 | 0  | 0 |
| 56 | 2 | 0  | 0 |
| 57 | 2 | 0  | 0 |
| 58 | 2 | 0  | 0 |
| 59 | 2 | 0  | 0 |
| 60 | 1 | 31 | 3 |
|    | 1 | 32 | 4 |

|    |   |    |   |
|----|---|----|---|
| 1  |   |    |   |
| 2  | 2 | 0  | 0 |
| 3  | 2 | 0  | 0 |
| 4  | 2 | 0  | 0 |
| 5  | 1 | 31 | 3 |
| 6  | 2 | 0  | 0 |
| 7  | 2 | 0  | 0 |
| 8  | 2 | 0  | 0 |
| 9  | 2 | 0  | 0 |
| 10 | 2 | 1  | 1 |
| 11 | 2 | 0  | 0 |
| 12 | 2 | 0  | 0 |
| 13 | 2 | 0  | 0 |
| 14 | 1 | 31 | 3 |
| 15 | 2 | 0  | 0 |
| 16 | 2 | 0  | 0 |
| 17 | 1 | 31 | 3 |
| 18 | 1 | 31 | 3 |
| 19 | 1 | 31 | 3 |
| 20 | 2 | 0  | 0 |
| 21 | 1 | 31 | 3 |
| 22 | 2 | 0  | 0 |
| 23 | 2 | 32 | 4 |
| 24 | 2 | 0  | 0 |
| 25 | 2 | 21 | 2 |
| 26 | 2 | 21 | 2 |
| 27 | 2 | 0  | 0 |
| 28 | 2 | 0  | 0 |
| 29 | 1 | 31 | 3 |
| 30 | 2 | 32 | 4 |
| 31 | 2 | 0  | 0 |
| 32 | 2 | 0  | 0 |
| 33 | 2 | 0  | 0 |
| 34 | 1 | 32 | 4 |
| 35 | 1 | 31 | 3 |
| 36 | 2 | 0  | 0 |
| 37 | 2 | 0  | 0 |
| 38 | 2 | 0  | 0 |
| 39 | 2 | 0  | 0 |
| 40 | 2 | 0  | 0 |
| 41 | 2 | 0  | 0 |
| 42 | 2 | 0  | 0 |
| 43 | 1 | 31 | 3 |
| 44 | 2 | 0  | 0 |
| 45 | 2 | 0  | 0 |
| 46 | 2 | 21 | 2 |
| 47 | 2 | 21 | 2 |
| 48 | 2 | 21 | 2 |
| 49 | 1 | 31 | 3 |
| 50 | 2 | 0  | 0 |
| 51 | 2 | 0  | 0 |
| 52 | 2 | 0  | 0 |
| 53 | 2 | 0  | 0 |
| 54 | 2 | 0  | 0 |
| 55 | 2 | 0  | 0 |
| 56 | 2 | 0  | 0 |
| 57 | 1 | 31 | 3 |
| 58 | 2 | 32 | 4 |
| 59 | 2 | 0  | 0 |
| 60 | 1 | 31 | 3 |

|    |   |    |   |
|----|---|----|---|
| 1  |   |    |   |
| 2  | 2 | 0  | 0 |
| 3  | 2 | 0  | 0 |
| 4  | 2 | 0  | 0 |
| 5  | 2 | 0  | 0 |
| 6  | 2 | 0  | 0 |
| 7  | 2 | 0  | 0 |
| 8  | 2 | 0  | 0 |
| 9  | 2 | 0  | 0 |
| 10 | 2 | 0  | 0 |
| 11 | 2 | 0  | 0 |
| 12 | 2 | 0  | 0 |
| 13 | 1 | 31 | 3 |
| 14 | 1 | 31 | 3 |
| 15 | 2 | 21 | 2 |
| 16 | 2 | 0  | 0 |
| 17 | 2 | 0  | 0 |
| 18 | 2 | 0  | 0 |
| 19 | 2 | 0  | 0 |
| 20 | 2 | 0  | 0 |
| 21 | 2 | 0  | 0 |
| 22 | 1 | 31 | 3 |
| 23 | 2 | 21 | 2 |
| 24 | 1 | 31 | 3 |
| 25 | 1 | 31 | 3 |
| 26 | 1 | 31 | 3 |
| 27 | 2 | 0  | 0 |
| 28 | 2 | 0  | 0 |
| 29 | 1 | 31 | 3 |
| 30 | 2 | 0  | 0 |
| 31 | 2 | 0  | 0 |
| 32 | 2 | 0  | 0 |
| 33 | 2 | 0  | 0 |
| 34 | 2 | 0  | 0 |
| 35 | 2 | 21 | 2 |
| 36 | 2 | 21 | 2 |
| 37 | 2 | 0  | 0 |
| 38 | 2 | 21 | 2 |
| 39 | 2 | 0  | 0 |
| 40 | 2 | 0  | 0 |
| 41 | 2 | 0  | 0 |
| 42 | 1 | 31 | 3 |
| 43 | 2 | 0  | 0 |
| 44 | 1 | 31 | 3 |
| 45 | 2 | 0  | 0 |
| 46 | 1 | 31 | 3 |
| 47 | 1 | 31 | 3 |
| 48 | 1 | 31 | 3 |
| 49 | 1 | 31 | 3 |
| 50 | 1 | 31 | 3 |
| 51 | 2 | 21 | 2 |
| 52 | 1 | 31 | 3 |
| 53 | 2 | 21 | 2 |
| 54 | 2 | 0  | 0 |
| 55 | 2 | 21 | 2 |
| 56 | 2 | 21 | 2 |
| 57 | 2 | 0  | 0 |
| 58 | 2 | 21 | 2 |
| 59 | 2 | 0  | 0 |
| 60 | 2 | 21 | 2 |
|    | 2 | 0  | 0 |

|    |   |    |   |
|----|---|----|---|
| 1  |   |    |   |
| 2  | 2 | 0  | 0 |
| 3  | 1 | 31 | 3 |
| 4  | 2 | 0  | 0 |
| 5  | 2 | 0  | 0 |
| 6  | 2 | 0  | 0 |
| 7  | 2 | 0  | 0 |
| 8  | 2 | 0  | 0 |
| 9  | 2 | 1  | 1 |
| 10 | 2 | 0  | 0 |
| 11 | 2 | 0  | 0 |
| 12 | 2 | 21 | 2 |
| 13 | 2 | 32 | 4 |
| 14 | 2 | 0  | 0 |
| 15 | 2 | 22 | 2 |
| 16 | 2 | 31 | 3 |
| 17 | 1 | 0  | 0 |
| 18 | 2 | 0  | 0 |
| 19 | 2 | 32 | 4 |
| 20 | 1 | 32 | 4 |
| 21 | 2 | 1  | 1 |
| 22 | 2 | 0  | 0 |
| 23 | 2 | 0  | 0 |
| 24 | 2 | 0  | 0 |
| 25 | 2 | 0  | 0 |
| 26 | 1 | 31 | 3 |
| 27 | 2 | 0  | 0 |
| 28 | 2 | 0  | 0 |
| 29 | 2 | 32 | 4 |
| 30 | 2 | 0  | 0 |
| 31 | 2 | 0  | 0 |
| 32 | 2 | 0  | 0 |
| 33 | 2 | 1  | 1 |
| 34 | 2 | 0  | 0 |
| 35 | 2 | 0  | 0 |
| 36 | 2 | 0  | 0 |
| 37 | 2 | 0  | 0 |
| 38 | 2 | 0  | 0 |
| 39 | 2 | 0  | 0 |
| 40 | 2 | 0  | 0 |
| 41 | 2 | 0  | 0 |
| 42 | 2 | 1  | 1 |
| 43 | 2 | 1  | 1 |
| 44 | 2 | 1  | 1 |
| 45 | 2 | 0  | 0 |
| 46 | 2 | 0  | 0 |
| 47 | 2 | 0  | 0 |
| 48 | 2 | 0  | 0 |
| 49 | 2 | 1  | 1 |
| 50 | 1 | 31 | 3 |
| 51 | 2 | 0  | 0 |
| 52 | 2 | 1  | 1 |
| 53 | 2 | 21 | 2 |
| 54 | 2 | 31 | 3 |
| 55 | 1 | 31 | 3 |
| 56 | 2 | 0  | 0 |
| 57 | 2 | 0  | 0 |
| 58 | 2 | 0  | 0 |
| 59 | 2 | 0  | 0 |
| 60 | 2 | 21 | 2 |
|    | 1 | 31 | 3 |



|    |   |    |   |
|----|---|----|---|
| 1  |   |    |   |
| 2  | 2 | 0  | 0 |
| 3  | 2 | 21 | 2 |
| 4  | 2 | 0  | 0 |
| 5  | 2 | 0  | 0 |
| 6  | 2 | 0  | 0 |
| 7  | 2 | 0  | 0 |
| 8  | 2 | 1  | 1 |
| 9  | 1 | 31 | 3 |
| 10 | 2 | 0  | 0 |
| 11 | 2 | 0  | 0 |
| 12 | 2 | 32 | 4 |
| 13 | 2 | 32 | 4 |
| 14 | 1 | 31 | 3 |
| 15 | 2 | 0  | 0 |
| 16 | 2 | 0  | 0 |
| 17 | 2 | 0  | 0 |
| 18 | 2 | 0  | 0 |
| 19 | 2 | 21 | 2 |
| 20 | 2 | 0  | 0 |
| 21 | 2 | 0  | 0 |
| 22 | 2 | 0  | 0 |
| 23 | 2 | 0  | 0 |
| 24 | 2 | 32 | 4 |
| 25 | 1 | 31 | 3 |
| 26 | 2 | 21 | 2 |
| 27 | 2 | 1  | 1 |
| 28 | 2 | 0  | 0 |
| 29 | 2 | 0  | 0 |
| 30 | 2 | 0  | 0 |
| 31 | 2 | 0  | 0 |
| 32 | 2 | 21 | 2 |
| 33 | 2 | 1  | 1 |
| 34 | 2 | 0  | 0 |
| 35 | 2 | 21 | 2 |
| 36 | 2 | 21 | 2 |
| 37 | 2 | 0  | 0 |
| 38 | 2 | 0  | 0 |
| 39 | 2 | 32 | 4 |
| 40 | 2 | 0  | 0 |
| 41 | 2 | 21 | 2 |
| 42 | 2 | 21 | 2 |
| 43 | 2 | 21 | 2 |
| 44 | 1 | 31 | 3 |
| 45 | 2 | 0  | 0 |
| 46 | 2 | 0  | 0 |
| 47 | 2 | 0  | 0 |
| 48 | 1 | 31 | 3 |
| 49 | 2 | 21 | 2 |
| 50 | 2 | 0  | 0 |
| 51 | 1 | 31 | 3 |
| 52 | 2 | 21 | 2 |
| 53 | 2 | 21 | 2 |
| 54 | 2 | 0  | 0 |
| 55 | 2 | 0  | 0 |
| 56 | 2 | 21 | 2 |
| 57 | 2 | 0  | 0 |
| 58 | 2 | 0  | 0 |
| 59 | 2 | 0  | 0 |
| 60 | 2 | 0  | 0 |
|    | 1 | 31 | 3 |

|    |   |    |   |
|----|---|----|---|
| 1  |   |    |   |
| 2  | 1 | 31 | 3 |
| 3  | 2 | 21 | 2 |
| 4  | 2 | 0  | 0 |
| 5  | 2 | 21 | 2 |
| 6  | 2 | 21 | 2 |
| 7  | 2 | 21 | 2 |
| 8  | 2 | 21 | 2 |
| 9  | 2 | 0  | 0 |
| 10 | 1 | 31 | 3 |
| 11 | 2 | 0  | 0 |
| 12 | 2 | 32 | 4 |
| 13 | 2 | 32 | 4 |
| 14 | 1 | 31 | 3 |
| 15 | 2 | 0  | 0 |
| 16 | 2 | 21 | 2 |
| 17 | 2 | 0  | 0 |
| 18 | 2 | 0  | 0 |
| 19 | 2 | 0  | 0 |
| 20 | 2 | 0  | 0 |
| 21 | 2 | 0  | 0 |
| 22 | 2 | 0  | 0 |
| 23 | 2 | 0  | 0 |
| 24 | 2 | 21 | 2 |
| 25 | 1 | 31 | 3 |
| 26 | 2 | 21 | 2 |
| 27 | 1 | 31 | 3 |
| 28 | 2 | 21 | 2 |
| 29 | 2 | 21 | 2 |
| 30 | 1 | 31 | 3 |
| 31 | 2 | 21 | 2 |
| 32 | 2 | 0  | 0 |
| 33 | 1 | 31 | 3 |
| 34 | 2 | 0  | 0 |
| 35 | 2 | 0  | 0 |
| 36 | 2 | 0  | 0 |
| 37 | 2 | 0  | 0 |
| 38 | 2 | 0  | 0 |
| 39 | 2 | 0  | 0 |
| 40 | 2 | 21 | 2 |
| 41 | 2 | 0  | 0 |
| 42 | 2 | 0  | 0 |
| 43 | 2 | 0  | 0 |
| 44 | 2 | 0  | 0 |
| 45 | 2 | 1  | 1 |
| 46 | 2 | 21 | 2 |
| 47 | 2 | 0  | 0 |
| 48 | 2 | 21 | 2 |
| 49 | 2 | 21 | 2 |
| 50 | 2 | 32 | 4 |
| 51 | 2 | 0  | 0 |
| 52 | 2 | 21 | 2 |
| 53 | 2 | 21 | 2 |
| 54 | 2 | 21 | 2 |
| 55 | 1 | 31 | 3 |
| 56 | 2 | 0  | 0 |
| 57 | 2 | 0  | 0 |
| 58 | 2 | 0  | 0 |
| 59 | 1 | 31 | 3 |
| 60 | 2 | 21 | 2 |
|    | 2 | 0  | 0 |

|    |   |    |   |
|----|---|----|---|
| 1  |   |    |   |
| 2  | 2 | 21 | 2 |
| 3  | 2 | 0  | 0 |
| 4  | 2 | 21 | 2 |
| 5  | 2 | 0  | 0 |
| 6  | 2 | 0  | 0 |
| 7  | 2 | 0  | 0 |
| 8  | 2 | 1  | 1 |
| 9  | 1 | 31 | 3 |
| 10 | 2 | 0  | 0 |
| 11 | 2 | 1  | 1 |
| 12 | 2 | 0  | 0 |
| 13 | 2 | 0  | 0 |
| 14 | 2 | 21 | 2 |
| 15 | 1 | 31 | 3 |
| 16 | 2 | 0  | 0 |
| 17 | 2 | 21 | 2 |
| 18 | 2 | 0  | 0 |
| 19 | 2 | 0  | 0 |
| 20 | 2 | 0  | 0 |
| 21 | 1 | 31 | 3 |
| 22 | 2 | 0  | 0 |
| 23 | 2 | 0  | 0 |
| 24 | 2 | 1  | 1 |
| 25 | 2 | 0  | 0 |
| 26 | 2 | 0  | 0 |
| 27 | 2 | 1  | 1 |
| 28 | 1 | 31 | 3 |
| 29 | 2 | 21 | 2 |
| 30 | 2 | 0  | 0 |
| 31 | 2 | 21 | 2 |
| 32 | 2 | 0  | 0 |
| 33 | 2 | 0  | 0 |
| 34 | 1 | 31 | 3 |
| 35 | 1 | 31 | 3 |
| 36 | 2 | 0  | 0 |
| 37 | 2 | 21 | 2 |
| 38 | 1 | 31 | 3 |
| 39 | 1 | 31 | 3 |
| 40 | 1 | 31 | 3 |
| 41 | 1 | 31 | 3 |
| 42 | 1 | 31 | 3 |
| 43 | 1 | 31 | 3 |
| 44 | 2 | 0  | 0 |
| 45 | 1 | 31 | 3 |
| 46 | 2 | 0  | 0 |
| 47 | 2 | 0  | 0 |
| 48 | 2 | 0  | 0 |
| 49 | 2 | 21 | 2 |
| 50 | 2 | 0  | 0 |
| 51 | 2 | 0  | 0 |
| 52 | 1 | 31 | 3 |
| 53 | 2 | 1  | 1 |
| 54 | 2 | 0  | 0 |
| 55 | 2 | 0  | 0 |
| 56 | 2 | 0  | 0 |
| 57 | 2 | 0  | 0 |
| 58 | 2 | 0  | 0 |
| 59 | 2 | 0  | 0 |
| 60 | 2 | 0  | 0 |

For peer review only

|    |   |   |   |
|----|---|---|---|
| 1  |   |   |   |
| 2  | 2 | 0 | 0 |
| 3  | 2 | 0 | 0 |
| 4  |   |   |   |
| 5  |   |   |   |
| 6  |   |   |   |
| 7  |   |   |   |
| 8  |   |   |   |
| 9  |   |   |   |
| 10 |   |   |   |
| 11 |   |   |   |
| 12 |   |   |   |
| 13 |   |   |   |
| 14 |   |   |   |
| 15 |   |   |   |
| 16 |   |   |   |
| 17 |   |   |   |
| 18 |   |   |   |
| 19 |   |   |   |
| 20 |   |   |   |
| 21 |   |   |   |
| 22 |   |   |   |
| 23 |   |   |   |
| 24 |   |   |   |
| 25 |   |   |   |
| 26 |   |   |   |
| 27 |   |   |   |
| 28 |   |   |   |
| 29 |   |   |   |
| 30 |   |   |   |
| 31 |   |   |   |
| 32 |   |   |   |
| 33 |   |   |   |
| 34 |   |   |   |
| 35 |   |   |   |
| 36 |   |   |   |
| 37 |   |   |   |
| 38 |   |   |   |
| 39 |   |   |   |
| 40 |   |   |   |
| 41 |   |   |   |
| 42 |   |   |   |
| 43 |   |   |   |
| 44 |   |   |   |
| 45 |   |   |   |
| 46 |   |   |   |
| 47 |   |   |   |
| 48 |   |   |   |
| 49 |   |   |   |
| 50 |   |   |   |
| 51 |   |   |   |
| 52 |   |   |   |
| 53 |   |   |   |
| 54 |   |   |   |
| 55 |   |   |   |
| 56 |   |   |   |
| 57 |   |   |   |
| 58 |   |   |   |
| 59 |   |   |   |
| 60 |   |   |   |

For peer review only

# Reporting checklist for cross sectional study.

Based on the STROBE cross sectional guidelines.

## Instructions to authors

Complete this checklist by entering the page numbers from your manuscript where readers will find each of the items listed below.

Your article may not currently address all the items on the checklist. Please modify your text to include the missing information. If you are certain that an item does not apply, please write "n/a" and provide a short explanation.

Upload your completed checklist as an extra file when you submit to a journal.

In your methods section, say that you used the STROBE cross sectional reporting guidelines, and cite them as:

von Elm E, Altman DG, Egger M, Pocock SJ, Gøtzsche PC, Vandenbroucke JP. The Strengthening the Reporting of Observational Studies in Epidemiology (STROBE) Statement: guidelines for reporting observational studies.

|                           | Reporting Item                                                                                                      | Page Number                  |
|---------------------------|---------------------------------------------------------------------------------------------------------------------|------------------------------|
| <b>Title and abstract</b> |                                                                                                                     |                              |
| Title                     | <a href="#">#1a</a> Indicate the study's design with a commonly used term in the title or the abstract              | Page-1, Line Number-1        |
| Abstract                  | <a href="#">#1b</a> Provide in the abstract an informative and balanced summary of what was done and what was found | Page-2,3, Line Number-25-54  |
| <b>Introduction</b>       |                                                                                                                     |                              |
| Background / rationale    | <a href="#">#2</a> Explain the scientific background and rationale for the investigation being reported             | Page-4-6, Line Number-75-135 |
| Objectives                | <a href="#">#3</a> State specific objectives, including any prespecified hypotheses                                 | Page-6, Line Number-133-135  |
| <b>Methods</b>            |                                                                                                                     |                              |

|    |                            |                      |                                                                                                                                                                                                                                                                      |                                  |
|----|----------------------------|----------------------|----------------------------------------------------------------------------------------------------------------------------------------------------------------------------------------------------------------------------------------------------------------------|----------------------------------|
| 1  | Study design               | <a href="#">#4</a>   | Present key elements of study design early in the paper                                                                                                                                                                                                              | Page-6, Line Number-138          |
| 2  |                            |                      |                                                                                                                                                                                                                                                                      |                                  |
| 3  |                            |                      |                                                                                                                                                                                                                                                                      |                                  |
| 4  | Setting                    | <a href="#">#5</a>   | Describe the setting, locations, and relevant dates, including periods of recruitment, exposure, follow-up, and data collection                                                                                                                                      | Page-6, Line Number-140-143      |
| 5  |                            |                      |                                                                                                                                                                                                                                                                      |                                  |
| 6  |                            |                      |                                                                                                                                                                                                                                                                      |                                  |
| 7  |                            |                      |                                                                                                                                                                                                                                                                      |                                  |
| 8  |                            |                      |                                                                                                                                                                                                                                                                      |                                  |
| 9  |                            |                      |                                                                                                                                                                                                                                                                      |                                  |
| 10 | Eligibility criteria       | <a href="#">#6a</a>  | Give the eligibility criteria, and the sources and methods of selection of participants.                                                                                                                                                                             | Page-6, Line Number-144-148      |
| 11 |                            |                      |                                                                                                                                                                                                                                                                      |                                  |
| 12 |                            |                      |                                                                                                                                                                                                                                                                      |                                  |
| 13 |                            |                      |                                                                                                                                                                                                                                                                      |                                  |
| 14 |                            | <a href="#">#7</a>   | Clearly define all outcomes, exposures, predictors, potential confounders, and effect modifiers. Give diagnostic criteria, if applicable                                                                                                                             | Page-6-8, Line Number-147-201    |
| 15 |                            |                      |                                                                                                                                                                                                                                                                      |                                  |
| 16 |                            |                      |                                                                                                                                                                                                                                                                      |                                  |
| 17 |                            |                      |                                                                                                                                                                                                                                                                      |                                  |
| 18 |                            |                      |                                                                                                                                                                                                                                                                      |                                  |
| 19 | Data sources / measurement | <a href="#">#8</a>   | For each variable of interest give sources of data and details of methods of assessment (measurement). Describe comparability of assessment methods if there is more than one group. Give information separately for for exposed and unexposed groups if applicable. | Page-7, Line Number-179-201      |
| 20 |                            |                      |                                                                                                                                                                                                                                                                      |                                  |
| 21 |                            |                      |                                                                                                                                                                                                                                                                      |                                  |
| 22 |                            |                      |                                                                                                                                                                                                                                                                      |                                  |
| 23 |                            |                      |                                                                                                                                                                                                                                                                      |                                  |
| 24 |                            |                      |                                                                                                                                                                                                                                                                      |                                  |
| 25 |                            |                      |                                                                                                                                                                                                                                                                      |                                  |
| 26 |                            |                      |                                                                                                                                                                                                                                                                      |                                  |
| 27 |                            |                      |                                                                                                                                                                                                                                                                      |                                  |
| 28 |                            |                      |                                                                                                                                                                                                                                                                      |                                  |
| 29 | Bias                       | <a href="#">#9</a>   | Describe any efforts to address potential sources of bias                                                                                                                                                                                                            | Page-8, Line Number-203-226      |
| 30 |                            |                      |                                                                                                                                                                                                                                                                      |                                  |
| 31 |                            |                      |                                                                                                                                                                                                                                                                      |                                  |
| 32 |                            |                      |                                                                                                                                                                                                                                                                      |                                  |
| 33 | Study size                 | <a href="#">#10</a>  | Explain how the study size was arrived at                                                                                                                                                                                                                            | Page-6, Line Number-139-140      |
| 34 |                            |                      |                                                                                                                                                                                                                                                                      |                                  |
| 35 |                            |                      |                                                                                                                                                                                                                                                                      |                                  |
| 36 | Quantitative variables     | <a href="#">#11</a>  | Explain how quantitative variables were handled in the analyses. If applicable, describe which groupings were chosen, and why                                                                                                                                        | Page-9, Line Number-239-258      |
| 37 |                            |                      |                                                                                                                                                                                                                                                                      |                                  |
| 38 |                            |                      |                                                                                                                                                                                                                                                                      |                                  |
| 39 |                            |                      |                                                                                                                                                                                                                                                                      |                                  |
| 40 |                            |                      |                                                                                                                                                                                                                                                                      |                                  |
| 41 | Statistical methods        | <a href="#">#12a</a> | Describe all statistical methods, including those used to control for confounding                                                                                                                                                                                    | Page-9 & 10, Line Number-240-260 |
| 42 |                            |                      |                                                                                                                                                                                                                                                                      |                                  |
| 43 |                            |                      |                                                                                                                                                                                                                                                                      |                                  |
| 44 |                            |                      |                                                                                                                                                                                                                                                                      |                                  |
| 45 | Statistical methods        | <a href="#">#12b</a> | Describe any methods used to examine subgroups and interactions                                                                                                                                                                                                      | n/a                              |
| 46 |                            |                      |                                                                                                                                                                                                                                                                      |                                  |
| 47 |                            |                      |                                                                                                                                                                                                                                                                      |                                  |
| 48 |                            |                      |                                                                                                                                                                                                                                                                      |                                  |
| 49 | Statistical methods        | <a href="#">#12c</a> | Explain how missing data were addressed                                                                                                                                                                                                                              | n/a                              |
| 50 |                            |                      |                                                                                                                                                                                                                                                                      |                                  |
| 51 |                            |                      |                                                                                                                                                                                                                                                                      |                                  |
| 52 |                            |                      |                                                                                                                                                                                                                                                                      |                                  |
| 53 | Statistical methods        | <a href="#">#12d</a> | If applicable, describe analytical methods taking account of sampling strategy                                                                                                                                                                                       | n/a                              |
| 54 |                            |                      |                                                                                                                                                                                                                                                                      |                                  |
| 55 |                            |                      |                                                                                                                                                                                                                                                                      |                                  |
| 56 |                            |                      |                                                                                                                                                                                                                                                                      |                                  |
| 57 | Statistical methods        | <a href="#">#12e</a> | Describe any sensitivity analyses                                                                                                                                                                                                                                    | n/a                              |
| 58 |                            |                      |                                                                                                                                                                                                                                                                      |                                  |
| 59 |                            |                      |                                                                                                                                                                                                                                                                      |                                  |
| 60 |                            |                      |                                                                                                                                                                                                                                                                      |                                  |

## Results

|                  |                      |                                                                                                                                                                                                                                                                                |                                                                         |
|------------------|----------------------|--------------------------------------------------------------------------------------------------------------------------------------------------------------------------------------------------------------------------------------------------------------------------------|-------------------------------------------------------------------------|
| Participants     | <a href="#">#13a</a> | Report numbers of individuals at each stage of study—eg numbers potentially eligible, examined for eligibility, confirmed eligible, included in the study, completing follow-up, and analysed. Give information separately for for exposed and unexposed groups if applicable. | n/a                                                                     |
| Participants     | <a href="#">#13b</a> | Give reasons for non-participation at each stage                                                                                                                                                                                                                               | Some of the participants were not participate as they had limited time. |
| Participants     | <a href="#">#13c</a> | Consider use of a flow diagram                                                                                                                                                                                                                                                 | n/a                                                                     |
| Descriptive data | <a href="#">#14a</a> | Give characteristics of study participants (eg demographic, clinical, social) and information on exposures and potential confounders. Give information separately for exposed and unexposed groups if applicable.                                                              | Page-10, Line Number-242-244                                            |
| Descriptive data | <a href="#">#14b</a> | Indicate number of participants with missing data for each variable of interest                                                                                                                                                                                                | n/a                                                                     |
| Outcome data     | <a href="#">#15</a>  | Report numbers of outcome events or summary measures. Give information separately for exposed and unexposed groups if applicable.                                                                                                                                              | n/a                                                                     |
| Main results     | <a href="#">#16a</a> | Give unadjusted estimates and, if applicable, confounder-adjusted estimates and their precision (eg, 95% confidence interval). Make clear which confounders were adjusted for and why they were included                                                                       | Page-13-16, Line Number- 292-308                                        |
| Main results     | <a href="#">#16b</a> | Report category boundaries when continuous variables were categorized                                                                                                                                                                                                          | Page-10-16, Line Number- 259-308                                        |
| Main results     | <a href="#">#16c</a> | If relevant, consider translating estimates of relative risk into absolute risk for a meaningful time period                                                                                                                                                                   | n/a                                                                     |

|    |                    |                     |                                                                                                                                                                  |                                  |
|----|--------------------|---------------------|------------------------------------------------------------------------------------------------------------------------------------------------------------------|----------------------------------|
| 1  | Other analyses     | <a href="#">#17</a> | Report other analyses done—e.g., analyses of subgroups and interactions, and sensitivity analyses                                                                | n/a                              |
| 2  |                    |                     |                                                                                                                                                                  |                                  |
| 3  |                    |                     |                                                                                                                                                                  |                                  |
| 4  |                    |                     |                                                                                                                                                                  |                                  |
| 5  |                    |                     |                                                                                                                                                                  |                                  |
| 6  | <b>Discussion</b>  |                     |                                                                                                                                                                  |                                  |
| 7  |                    |                     |                                                                                                                                                                  |                                  |
| 8  |                    |                     |                                                                                                                                                                  |                                  |
| 9  | Key results        | <a href="#">#18</a> | Summarise key results with reference to study objectives                                                                                                         | Page-16-20, Line Number- 311-434 |
| 10 |                    |                     |                                                                                                                                                                  |                                  |
| 11 |                    |                     |                                                                                                                                                                  |                                  |
| 12 | Limitations        | <a href="#">#19</a> | Discuss limitations of the study, taking into account sources of potential bias or imprecision. Discuss both direction and magnitude of any potential bias.      | Page-20-21, Line Number-436-447  |
| 13 |                    |                     |                                                                                                                                                                  |                                  |
| 14 |                    |                     |                                                                                                                                                                  |                                  |
| 15 |                    |                     |                                                                                                                                                                  |                                  |
| 16 |                    |                     |                                                                                                                                                                  |                                  |
| 17 |                    |                     |                                                                                                                                                                  |                                  |
| 18 | Interpretation     | <a href="#">#20</a> | Give a cautious overall interpretation considering objectives, limitations, multiplicity of analyses, results from similar studies, and other relevant evidence. | Page-16-20, Line Number- 311-434 |
| 19 |                    |                     |                                                                                                                                                                  |                                  |
| 20 |                    |                     |                                                                                                                                                                  |                                  |
| 21 |                    |                     |                                                                                                                                                                  |                                  |
| 22 |                    |                     |                                                                                                                                                                  |                                  |
| 23 |                    |                     |                                                                                                                                                                  |                                  |
| 24 | Generalisability   | <a href="#">#21</a> | Discuss the generalisability (external validity) of the study results                                                                                            | Page-20-21, Line Number-436-447  |
| 25 |                    |                     |                                                                                                                                                                  |                                  |
| 26 |                    |                     |                                                                                                                                                                  |                                  |
| 27 |                    |                     |                                                                                                                                                                  |                                  |
| 28 | <b>Other</b>       |                     |                                                                                                                                                                  |                                  |
| 29 | <b>Information</b> |                     |                                                                                                                                                                  |                                  |
| 30 |                    |                     |                                                                                                                                                                  |                                  |
| 31 |                    |                     |                                                                                                                                                                  |                                  |
| 32 | Funding            | <a href="#">#22</a> | Give the source of funding and the role of the funders for the present study and, if applicable, for the original study on which the present article is based    | Page-22, Line Number-467-470     |
| 33 |                    |                     |                                                                                                                                                                  |                                  |
| 34 |                    |                     |                                                                                                                                                                  |                                  |
| 35 |                    |                     |                                                                                                                                                                  |                                  |
| 36 |                    |                     |                                                                                                                                                                  |                                  |
| 37 |                    |                     |                                                                                                                                                                  |                                  |
| 38 |                    |                     |                                                                                                                                                                  |                                  |

39 None The STROBE checklist is distributed under the terms of the Creative Commons Attribution  
 40 License CC-BY. This checklist can be completed online using <https://www.goodreports.org/>, a tool  
 41 made by the [EQUATOR Network](#) in collaboration with [Penelope.ai](#)  
 42  
 43  
 44  
 45  
 46  
 47  
 48  
 49  
 50  
 51  
 52  
 53  
 54  
 55  
 56  
 57  
 58  
 59  
 60
